# Supplementary material
Source: Royal Society of Chemistry journal article supplement (doi:10.1039/d6cp00552g)
Supplement: d6cp00552g1.pdf [file d6cp00552g1.pdf]

## Supporting Information

### Theoretical insights into p-block functionalized carbon edges for efficient electrochemical CO<sub>2</sub> reduction

#### Computational details

In this work, vibrational frequencies were calculated using the finite-difference method implemented in VASP. The frequencies were obtained by displacing atoms from their optimized equilibrium positions and evaluating the corresponding forces. The vibrational calculations were performed using  $IBRION = 5$ , which activates the frozen phonon method in VASP to calculate the zone-center vibrational frequencies. The parameter  $NFREE$  was set to 0, which corresponds to the default displacement scheme used by VASP for frozen phonon calculations; under this setting, VASP automatically determines the required ionic displacements to construct the Hessian matrix. The displacement magnitude was controlled by the parameter  $POTIM$ , which defines the step width of atomic displacements in the finite-difference calculation. In this work, the displacement amplitude was  $0.015 \text{ \AA}$ , a value widely used in phonon calculations to ensure the validity of the harmonic approximation while maintaining numerical stability. Regarding the displacement scheme, each atom in the system was displaced along the three Cartesian directions, and the corresponding forces were calculated. The Hessian matrix was then constructed from the resulting force constants, from which the vibrational modes and vibrational frequencies of the system were obtained. During structural optimization, the electronic self-consistent loop was converged to  $10^{-7} \text{ eV}$ , and the atomic structures were relaxed until the residual forces on each atom were smaller than  $0.01 \text{ eV \AA}^{-1}$ .

In the vibrational frequency calculations, only the adsorbed species were considered, and the remaining atoms of the graphene nanoribbon were kept fixed.

To avoid artificial entropy divergence caused by very low-frequency modes of adsorbates, vibrational frequencies lower than  $50 \text{ cm}^{-1}$  were replaced by  $50 \text{ cm}^{-1}$  when calculating vibrational entropy contributions.

For gas-phase molecules (CO<sub>2</sub>, CO, and H<sub>2</sub>), thermodynamic corrections were evaluated under the ideal-gas approximation at 298.15 K and 1 atm. The entropy contributions include translational,

rotational, and vibrational terms. For adsorbed species, only vibrational entropy contributions were considered because translational and rotational motions are restricted upon adsorption. Within the computational hydrogen electrode (CHE) framework, the chemical potential of the proton–electron pair ( $\text{H}^+ + \text{e}^-$ ) was referenced to  $1/2\text{H}_2$  under standard conditions ( $U = 0 \text{ V}$  vs. RHE and  $\text{pH} = 0$ ).

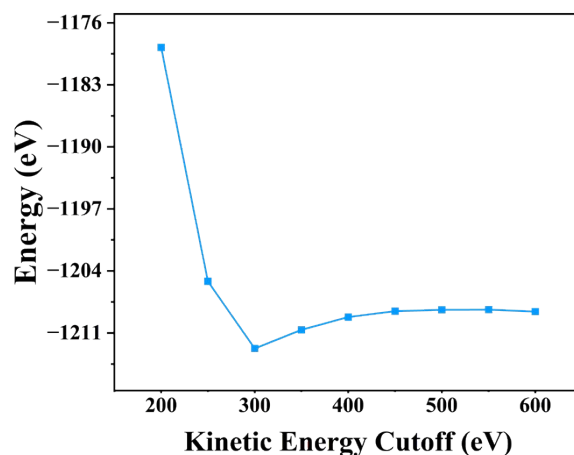

**Fig. S1.** Planewave energy cut off (using  $1 \times 1 \times 1$  k-points) convergence plots for CO chemisorption on Edge-AsH<sub>2</sub>/C.

### Supporting data for vibrational calculations

Representative VASP input and output files used for the vibrational frequency calculations are provided as separate supporting data files. These files correspond to the frequency calculation of the CO intermediate adsorbed on the Edge-AsH<sub>2</sub>/C system and include the INCAR, KPOINTS, and POSCAR input files as well as an example OUTCAR file. These files illustrate the workflow used to obtain the vibrational frequencies and compute the zero-point energy (ZPE) and entropy corrections. The same computational settings were applied to all intermediates studied in this work.

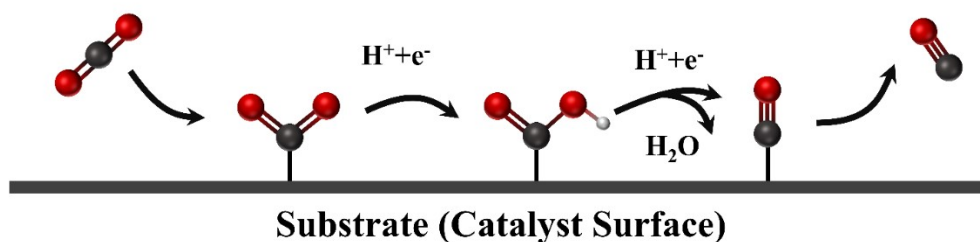

**Fig. S2.** Reaction Pathways and Energy Evolution Mechanisms of CO<sub>2</sub>-to-CO Reduction

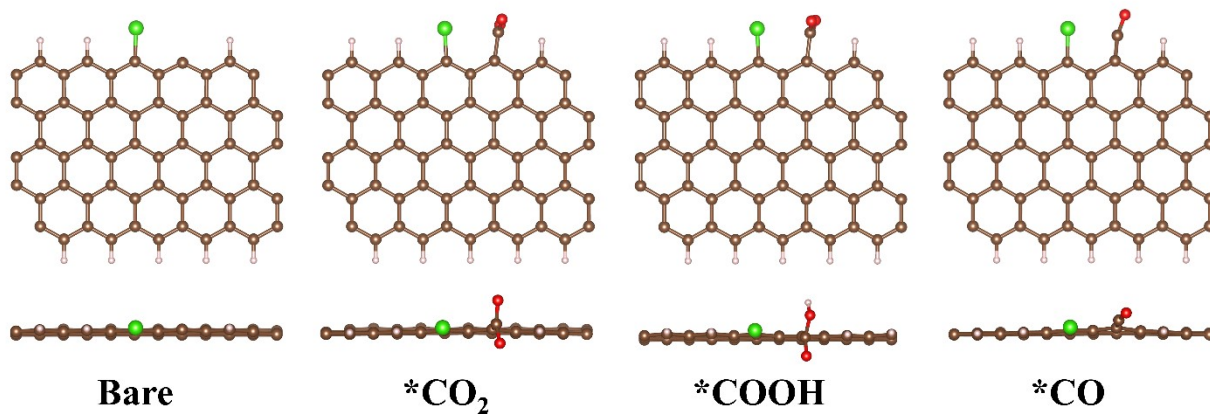

**Fig. S3.** Optimized geometric structures of intermediates over Edge-Cl/C.

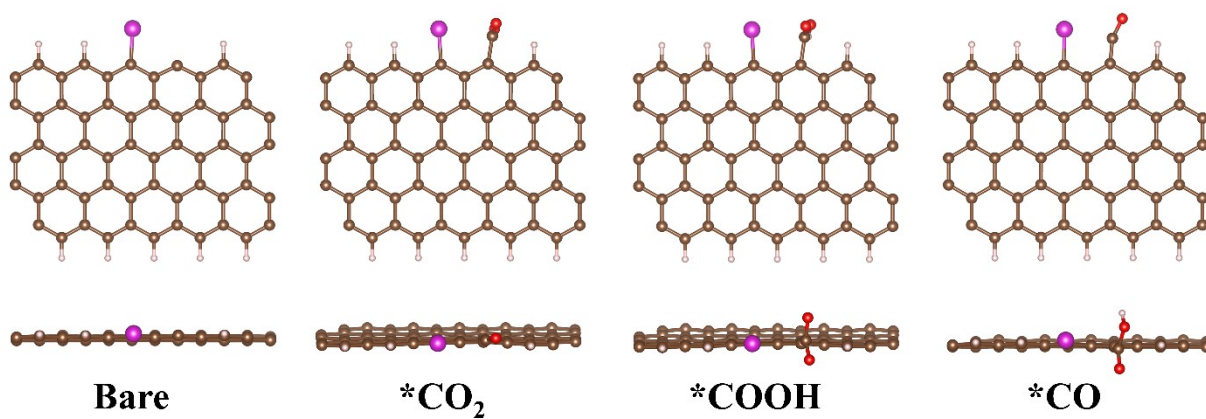

**Fig. S4.** Optimized geometric structures of intermediates over Edge-Br/C.

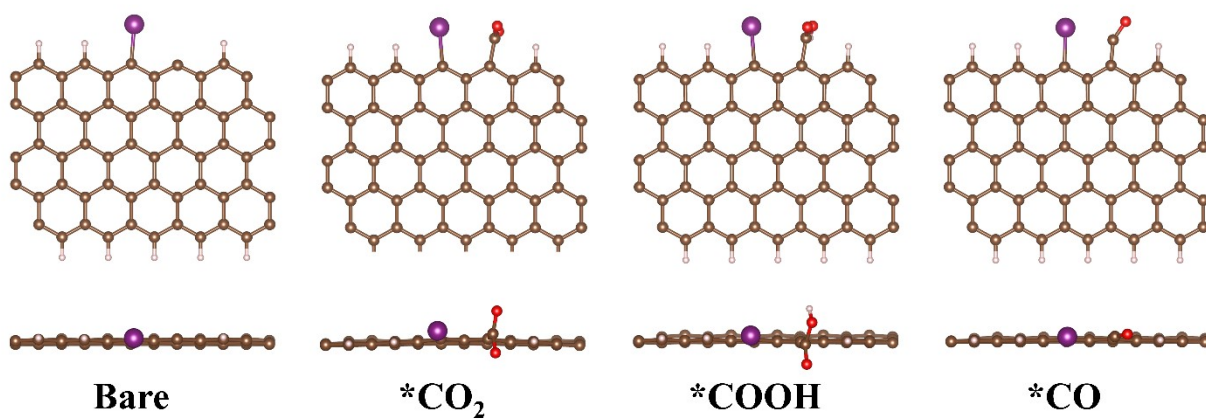

**Fig. S5.** Optimized geometric structures of intermediates over Edge-I/C.

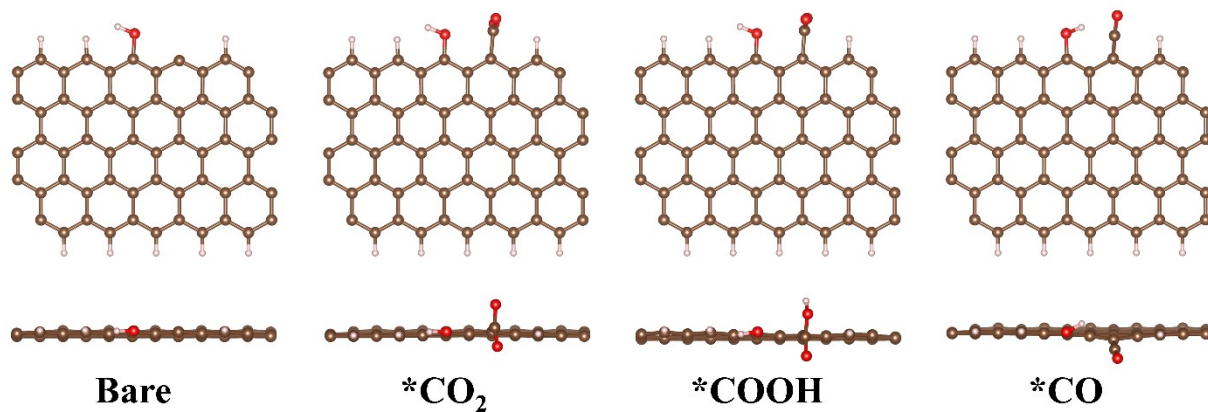

**Fig. S6.** Optimized geometric structures of intermediates over Edge-OH/C.

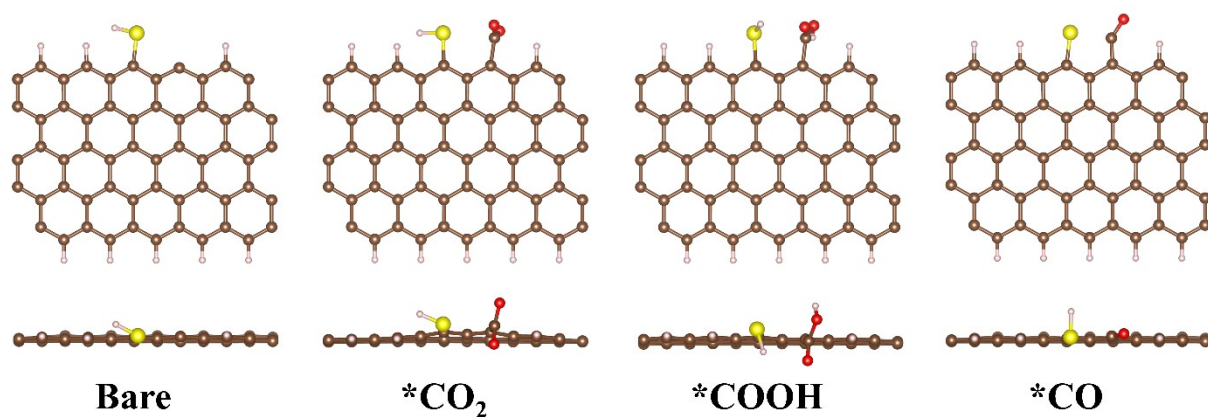

**Fig. S7.** Optimized geometric structures of intermediates over Edge-SH/C.

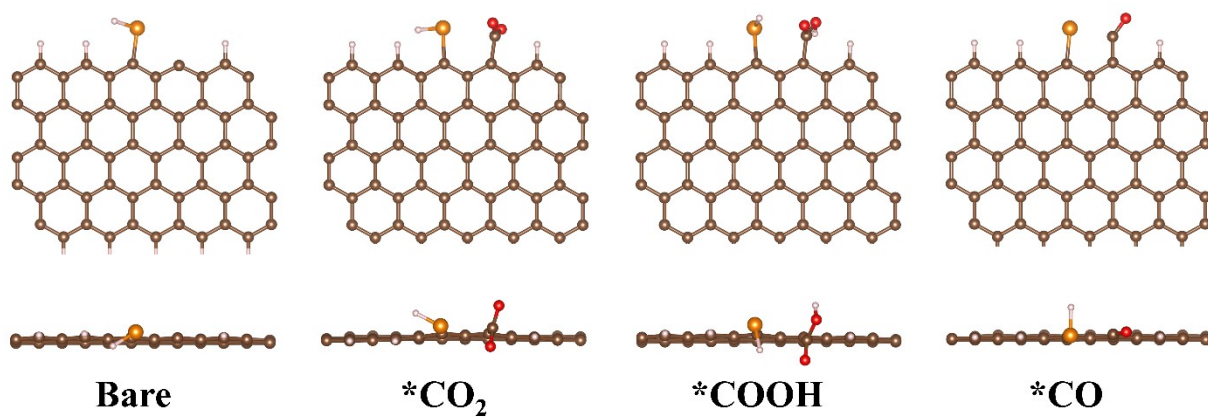

**Fig. S8.** Optimized geometric structures of intermediates over Edge-SeH/C.

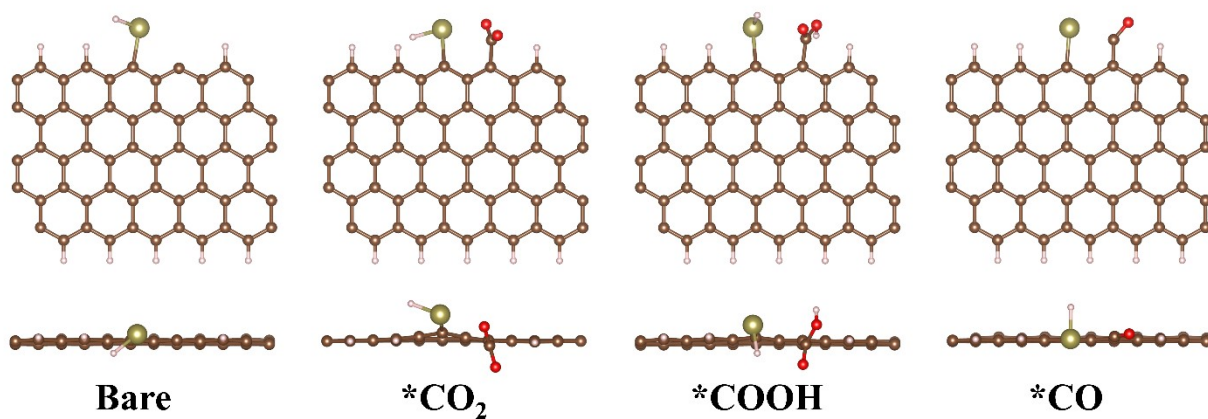

**Fig. S9.** Optimized geometric structures of intermediates over Edge-TeH/C.

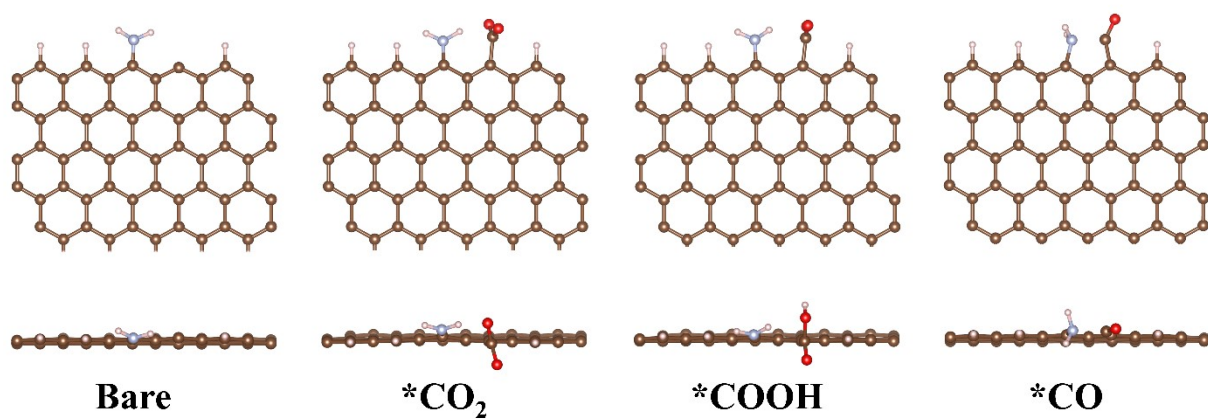

**Fig. S10.** Optimized geometric structures of intermediates over Edge-NH<sub>2</sub>/C.

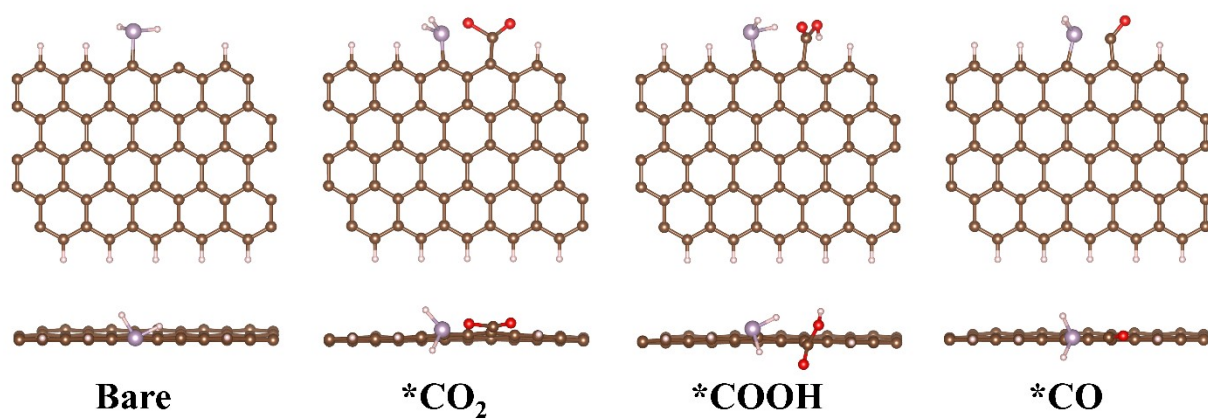

**Fig. S11.** Optimized geometric structures of intermediates over Edge-PH<sub>2</sub>/C.

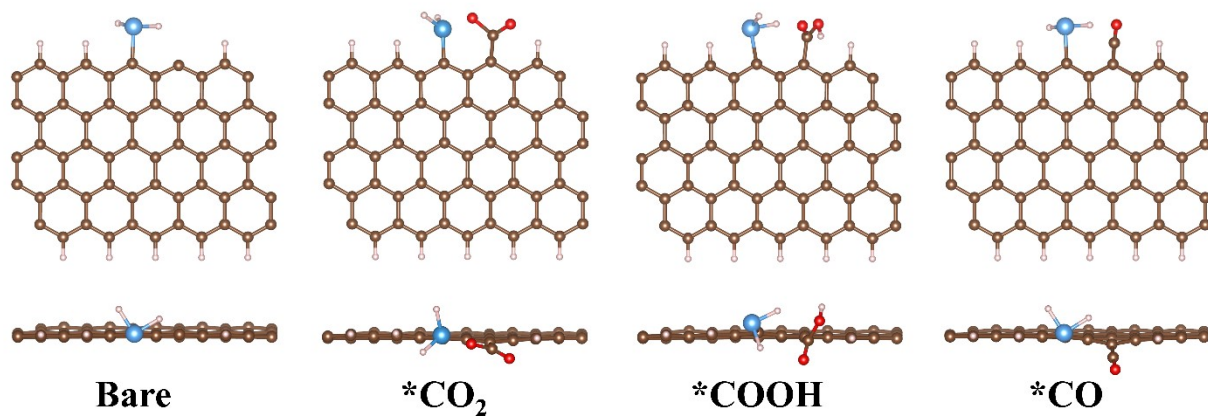

**Fig. S12.** Optimized geometric structures of intermediates over Edge-AsH<sub>2</sub>/C.

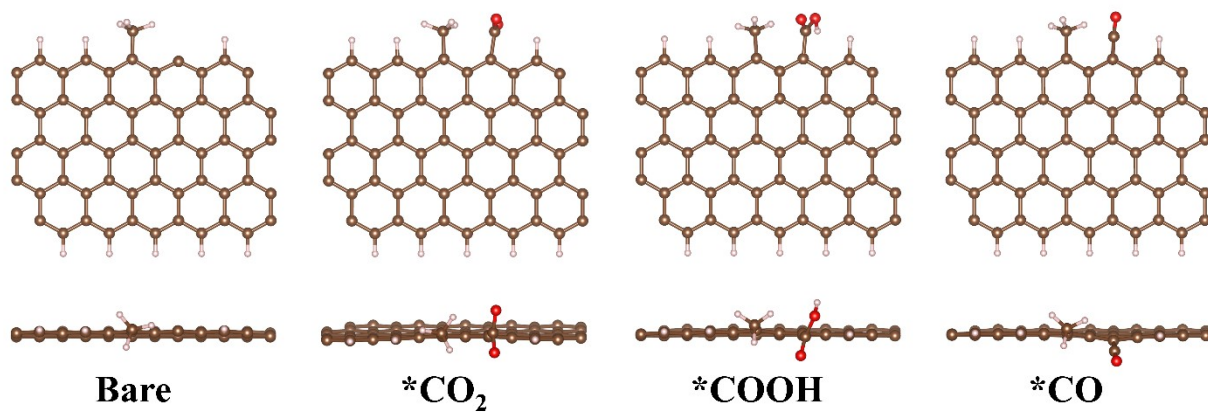

**Fig. S13.** Optimized geometric structures of intermediates over Edge-CH<sub>3</sub>/C.

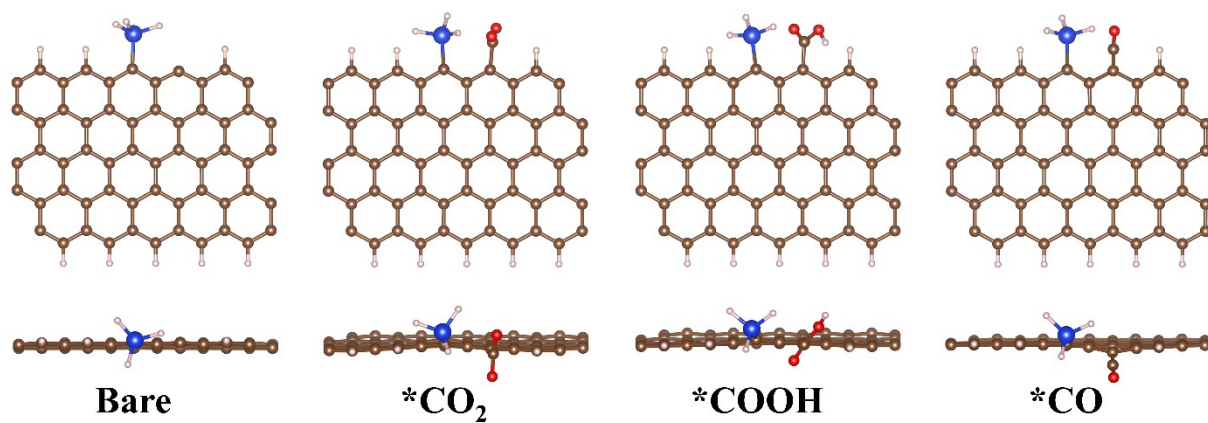

**Fig. S14.** Optimized geometric structures of intermediates over Edge-SiH<sub>3</sub>/C.

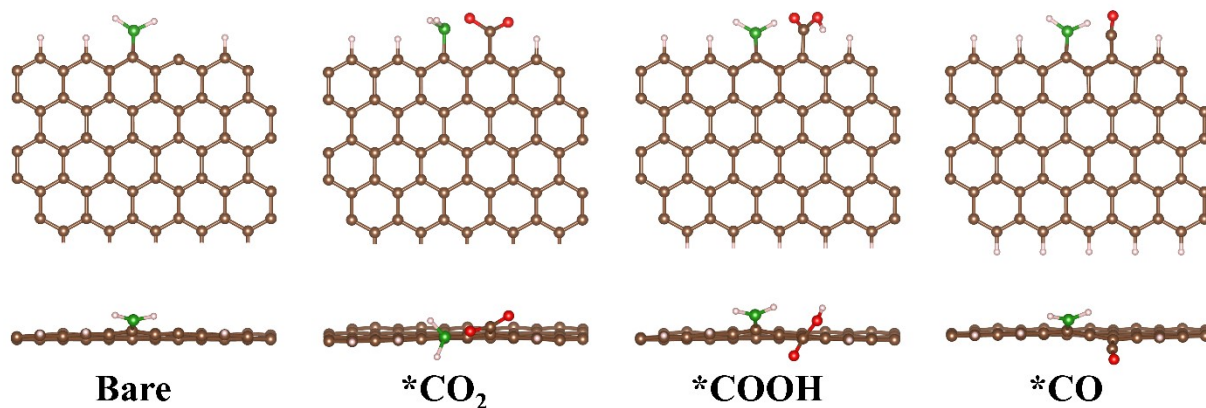

**Fig. S15.** Optimized geometric structures of intermediates over Edge-BH<sub>2</sub>/C.

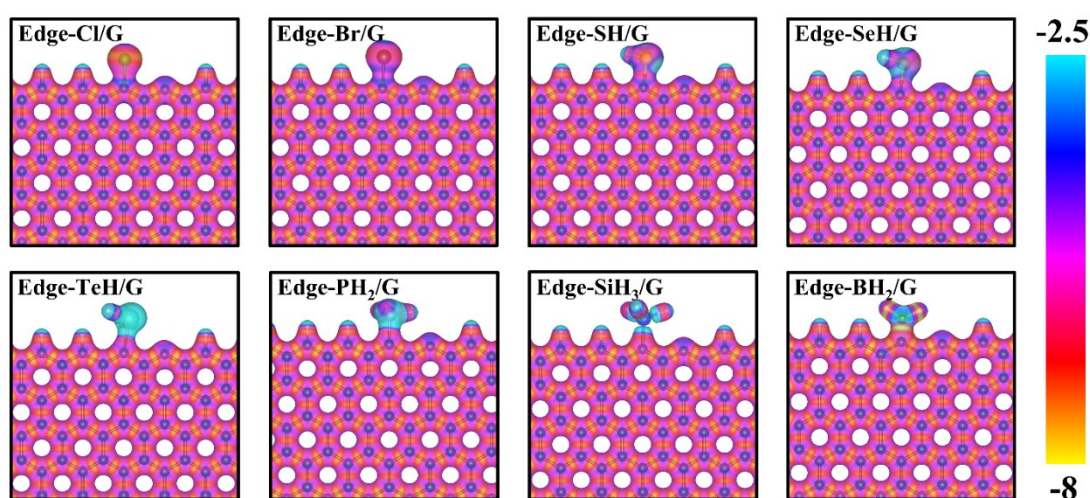

**Fig. S16.** Electrostatic potential distribution of Edge-Cl/C, Edge-Br/C, Edge-SH/C, Edge-SeH/C, Edge-TeH/C, Edge-PH<sub>2</sub>/C, Edge-SiH<sub>3</sub>/C and Edge-BH<sub>2</sub>/C.

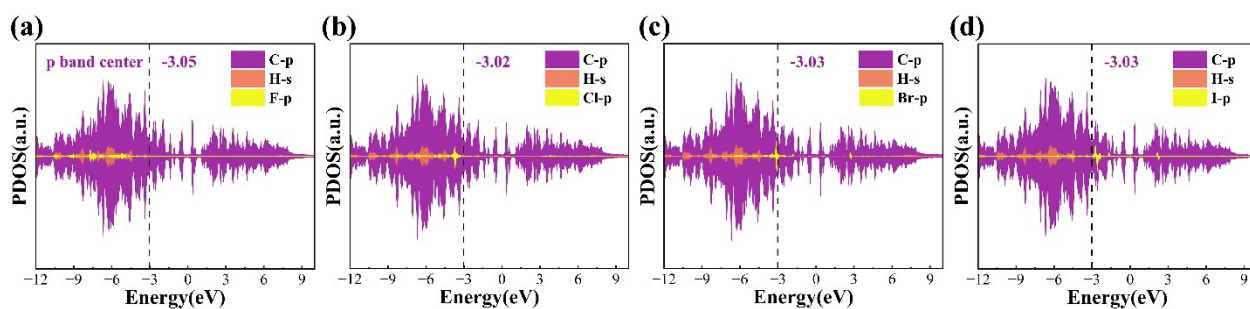

**Fig. S17.** Projected density of states of (a) Edge-F/C; (b) Edge-Cl/C; (c) Edge-Br/C; (d) Edge-I/C.

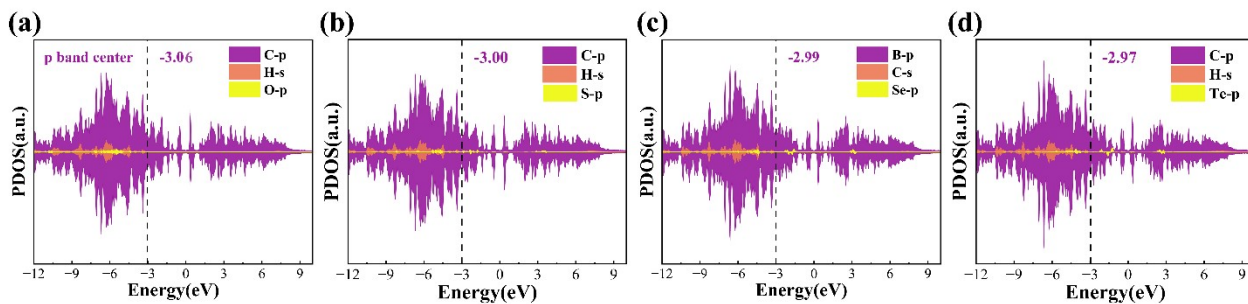

**Fig. S18.** Projected density of states of (a) Edge-OH/C; (b) Edge-SH/C; (c) Edge-SeH/C; (d) Edge-TeH/C.

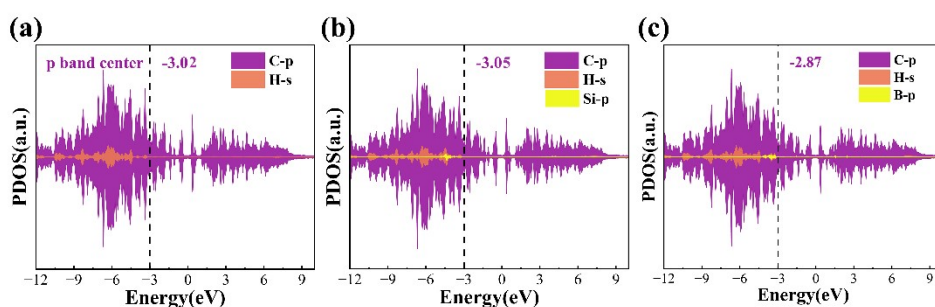

**Fig. S19.** Projected density of states of (a) Edge-CH<sub>3</sub>/C; (b) Edge-SiH<sub>3</sub>/C; (c) Edge-BH<sub>2</sub>/C.

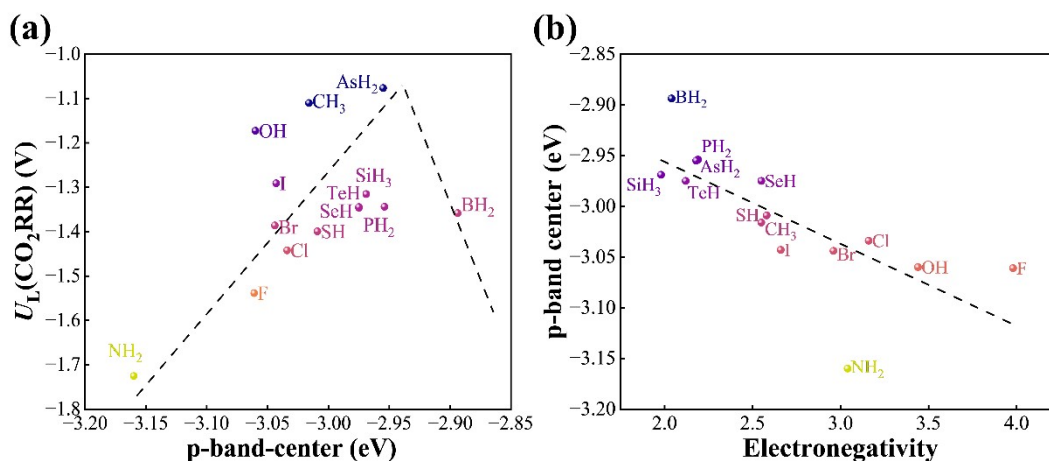

**Fig. S20.** Validation of the structure-activity relationships using the RPBE functional. (a) Relationship between the  $U_L$  and the p-band center of the carbon active sites. (b) Relationship between the p-band center of the carbon active sites and the electronegativity of the functional groups.

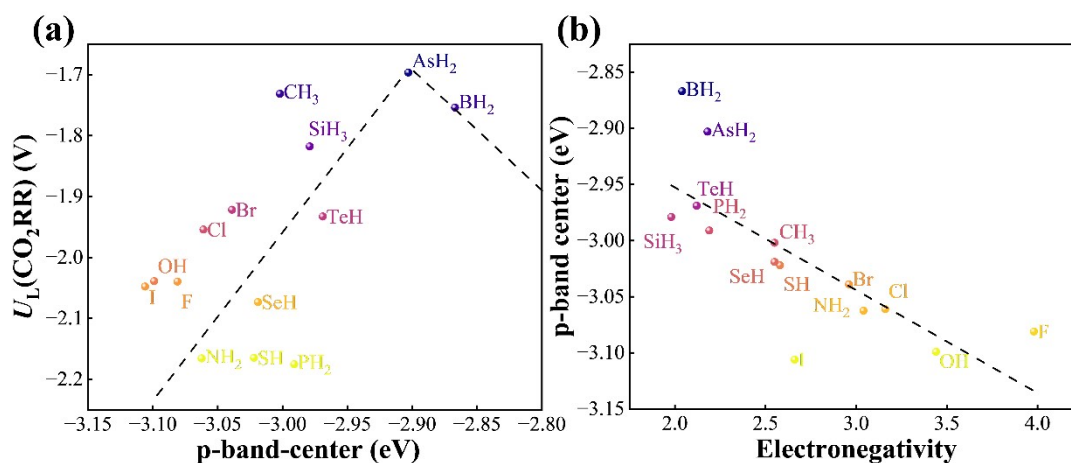

**Fig. S21.** Validation of structure-activity relationships incorporating the VASPsol implicit solvation model ( $\text{EB\_K} = 78.4$ ). (a) Relationship between the  $U_L$  and the p-band center of carbon active sites. (b) Correlation between the p-band center of carbon active sites and the electronegativity of the introduced functional groups. The results demonstrate that the trends remain robust in an aqueous environment.

## Representative computational files

To illustrate the computational workflow, representative VASP input and output files (including INCAR, KPOINTS, POSCAR, and an example OUTCAR) are provided for the vibrational frequency calculation of the CO intermediate adsorbed on the Edge-AsH<sub>2</sub>/C system.

### INCAR

NCORE = 1

ISTART = 1

ICHARG = 1

LWAVE = .FALSE.

LCHARG = .FALSE.

LORBIT = 11

ENCUT = 400

ISMEAR = 0

SIGMA = 0.05

EDIFF = 1E-7

NELMIN = 5

NELM = 200

GGA = PE

LREAL = Auto

ALGO = Fast

ISPIN = 2

EDIFFG = -0.01

IBRION = 5

NSW = 3000

ISIF = 2

IVDW = 11

### KPOINTS

K

Gamma

1 1 1

0.0 0.0 0.0

### POSCAR

|                    |                    |                    |
|--------------------|--------------------|--------------------|
| 14.780599999999997 | 0.0000000000000000 | 0.0000000000000000 |
| 0.0000000000000000 | 21.333899999999999 | 0.0000000000000000 |
| 0.0000000000000000 | 0.0000000000000000 | 18.425699999999991 |

H C As O

24 121 1 1

Selective Dynamics

Direct

|                    |                    |                    |       |      |
|--------------------|--------------------|--------------------|-------|------|
| 0.0842827448243466 | 0.1888401298875863 | 0.2952284261282731 | F F F | H001 |
| 0.0818803154246983 | 0.1910486376296957 | 0.4579073784134210 | F F F | H002 |
| 0.2509113506189883 | 0.1888495025507219 | 0.2952206162936981 | F F F | H003 |
| 0.2489737289082186 | 0.1911198846268702 | 0.4578876144763527 | F F F | H004 |

|                    |                    |                    |       |      |
|--------------------|--------------------|--------------------|-------|------|
| 0.4175455408440487 | 0.1888326699932459 | 0.2952084875393743 | F F F | H005 |
| 0.4157356461806057 | 0.1913819060061859 | 0.4576733424281593 | F F F | H006 |
| 0.5842204364799898 | 0.1888078127419974 | 0.2951684409706413 | F F F | H007 |
| 0.5820728436739949 | 0.1915880137649009 | 0.4575615531931824 | F F F | H008 |
| 0.7509354426450099 | 0.1887998755629026 | 0.2951773416039357 | F F F | H009 |
| 0.7482922101179702 | 0.1915351155090610 | 0.4575667773295219 | F F F | H010 |
| 0.9176294706953719 | 0.1888106576394027 | 0.2952246513867149 | F F F | H011 |
| 0.9148077040723498 | 0.1912668997276624 | 0.4577022931703638 | F F F | H012 |
| 0.1652443374075854 | 0.7256400510182786 | 0.4804291158193799 | F F F | H013 |
| 0.0011598510822151 | 0.7240233627727167 | 0.2889814520124729 | F F F | H014 |
| 0.3288367756471584 | 0.7254784519548638 | 0.4811883574111332 | F F F | H015 |
| 0.1677983864728379 | 0.7241312829318650 | 0.2863185071349593 | F F F | H016 |
| 0.3344803182701149 | 0.7241644057229439 | 0.2848569894232263 | F F F | H017 |
| 0.8332075973384732 | 0.7257190671657263 | 0.4885626493212136 | F F F | H018 |
| 0.6676126748840714 | 0.7239915479458894 | 0.2899078671798710 | F F F | H019 |
| 0.9987953381133803 | 0.7257206907812074 | 0.4829946689315169 | F F F | H020 |
| 0.8344617136160314 | 0.7239697325225538 | 0.2909677260976732 | F F F | H021 |
| 0.5011587988042231 | 0.7240195802819341 | 0.2857223766992348 | F F F | H022 |
| 0.4362787187675821 | 0.7661174593128154 | 0.4019647042980633 | F F F | H023 |
| 0.5818871070448182 | 0.7723128137208481 | 0.4283415152113995 | F F F | H024 |
| 0.0842619104444478 | 0.2399377784197958 | 0.2906269269790748 | F F F | C001 |
| 0.1653170015173659 | 0.2736904963069490 | 0.4679835365991118 | F F F | C002 |

|                    |                    |                    |       |      |
|--------------------|--------------------|--------------------|-------|------|
| 0.0009333245335456 | 0.2716472900964854 | 0.2868672624512447 | F F F | C003 |
| 0.0819067516446296 | 0.2420656243769368 | 0.4635648419130271 | F F F | C004 |
| 0.1653184419017500 | 0.3412084534649198 | 0.4747889338165369 | F F F | C005 |
| 0.2509138196731173 | 0.2399450248887889 | 0.2905668034237513 | F F F | C006 |
| 0.3320567307986007 | 0.2738902958210024 | 0.4678915747818297 | F F F | C007 |
| 0.1675852975000238 | 0.2716618243640871 | 0.2867715497094489 | F F F | C008 |
| 0.2487579211642718 | 0.2421368864429145 | 0.4634833168329932 | F F F | C009 |
| 0.3320323484600892 | 0.3414273169605941 | 0.4747590626941771 | F F F | C010 |
| 0.4175638548474319 | 0.2399279762617466 | 0.2905903144117638 | F F F | C011 |
| 0.4986914145131727 | 0.2741782318206483 | 0.4678758953804779 | F F F | C012 |
| 0.3342414964478872 | 0.2716558010836332 | 0.2867409033099376 | F F F | C013 |
| 0.4154635840426623 | 0.2423881515493131 | 0.4633284763945892 | F F F | C014 |
| 0.4986746194397080 | 0.3417015895546640 | 0.4749517785570104 | F F F | C015 |
| 0.5842407840486820 | 0.2399091538336308 | 0.2906378464353064 | F F F | C016 |
| 0.6652187674891087 | 0.2742891653319269 | 0.4680078278981035 | F F F | C017 |
| 0.5009092896418317 | 0.2716323859009793 | 0.2868339344246869 | F F F | C018 |
| 0.5819752585942339 | 0.2425848292823787 | 0.4633520650008812 | F F F | C019 |
| 0.6651989765524547 | 0.3417613313476685 | 0.4752706333697170 | F F F | C020 |
| 0.7509370782754136 | 0.2399063852300192 | 0.2906689127651720 | F F F | C021 |
| 0.8317988913795330 | 0.2740583723594172 | 0.4680335509527730 | F F F | C022 |
| 0.6675981439944715 | 0.2716183295064094 | 0.2869244427726086 | F F F | C023 |
| 0.7484550607666985 | 0.2425290056733195 | 0.4634252915903129 | F F F | C024 |

|                    |                    |                    |       |      |
|--------------------|--------------------|--------------------|-------|------|
| 0.8317845978767109 | 0.3415828204667761 | 0.4751693045832825 | F F F | C025 |
| 0.9176070096135777 | 0.2399133455149763 | 0.2906838570353447 | F F F | C026 |
| 0.9985355489683677 | 0.2737370569394882 | 0.4680603585328877 | F F F | C027 |
| 0.8342814631007808 | 0.2716242247981018 | 0.2869320330944537 | F F F | C028 |
| 0.9150746492515700 | 0.2422641423586044 | 0.4634947706570813 | F F F | C029 |
| 0.9985499553337046 | 0.3412465144529280 | 0.4749773117184443 | F F F | C030 |
| 0.0009699469123150 | 0.3392863466316798 | 0.2816808808972854 | F F F | C031 |
| 0.0843598962106220 | 0.4397046347140331 | 0.2785025458451361 | F F F | C032 |
| 0.0819217304577262 | 0.3740802990910975 | 0.4773703789151835 | F F F | C033 |
| 0.1652260464818601 | 0.4744764919393368 | 0.4814692697062304 | F F F | C034 |
| 0.0010362824436301 | 0.4728092207987223 | 0.2789845361186983 | F F F | C035 |
| 0.0843035258005342 | 0.3722921222201733 | 0.2799214159490780 | F F F | C036 |
| 0.0819198251285078 | 0.4413594455361716 | 0.4807316275585395 | F F F | C037 |
| 0.1651302255911437 | 0.5416321657535508 | 0.4821600894489430 | F F F | C038 |
| 0.1676163491146704 | 0.3392918759349486 | 0.2814466092212586 | F F F | C039 |
| 0.2510025051073796 | 0.4397017238297341 | 0.2781799058017721 | F F F | C040 |
| 0.2486598529479876 | 0.3742213681762431 | 0.4772406352171555 | F F F | C041 |
| 0.3318453711869925 | 0.4747961024276677 | 0.4816739774146988 | F F F | C042 |
| 0.1676975644907913 | 0.4728215380350964 | 0.2782500562781694 | F F F | C043 |
| 0.2509635562931184 | 0.3722909194187376 | 0.2797404144651786 | F F F | C044 |
| 0.2486971242465456 | 0.4415368992105962 | 0.4805490419699406 | F F F | C045 |
| 0.3316938477312448 | 0.5420976784918367 | 0.4825249550688998 | F F F | C046 |

|                    |                    |                    |       |      |
|--------------------|--------------------|--------------------|-------|------|
| 0.3342790803368405 | 0.3392862601658221 | 0.2814289084801485 | F F F | C047 |
| 0.4176543850964537 | 0.4396768726974998 | 0.2785094804153253 | F F F | C048 |
| 0.4153171641060418 | 0.3745420881125773 | 0.4774024042484859 | F F F | C049 |
| 0.4984779607753970 | 0.4751875434801400 | 0.4827351016208030 | F F F | C050 |
| 0.3343544776161380 | 0.4728069700178834 | 0.2782525485006686 | F F F | C051 |
| 0.4176309262158837 | 0.3722706878977521 | 0.2799164253947181 | F F F | C052 |
| 0.4153678595072685 | 0.4418601064262155 | 0.4809389987792762 | F F F | C053 |
| 0.4982273654831270 | 0.5426674792554900 | 0.4846137060147139 | F F F | C054 |
| 0.5009445639129243 | 0.3392695502319515 | 0.2816780477605970 | F F F | C055 |
| 0.5843471259336578 | 0.4396618040961091 | 0.2792527336632633 | F F F | C056 |
| 0.5819016343697726 | 0.3747874137423360 | 0.4779284094182991 | F F F | C057 |
| 0.6651070052304692 | 0.4754340107095823 | 0.4845632470536068 | F F F | C058 |
| 0.5010305699395168 | 0.4727812902735594 | 0.2789928389603737 | F F F | C059 |
| 0.5843044865863175 | 0.3722554119640999 | 0.2803447706195842 | F F F | C060 |
| 0.5818960423987584 | 0.4421387781564420 | 0.4822244703754562 | F F F | C061 |
| 0.6650115255329112 | 0.5429123475129605 | 0.4885002900130555 | F F F | C062 |
| 0.6676355825409546 | 0.3392663391746272 | 0.2819372349795559 | F F F | C063 |
| 0.7510564252584299 | 0.4396661147953611 | 0.2795854841679201 | F F F | C064 |
| 0.7485019132708155 | 0.3747138412995796 | 0.4780380030634245 | F F F | C065 |
| 0.8320466549820991 | 0.4748044637235345 | 0.4832055790041310 | F F F | C066 |
| 0.6677200287018262 | 0.4727655559097856 | 0.2798433247671959 | F F F | C067 |
| 0.7509985003104263 | 0.3722595741176703 | 0.2805113457155740 | F F F | C068 |

|                    |                    |                    |       |      |
|--------------------|--------------------|--------------------|-------|------|
| 0.7484173210833667 | 0.4420487150532820 | 0.4823909968547150 | F F F | C069 |
| 0.8323442745838756 | 0.5421215533234636 | 0.4855684901576776 | F F F | C070 |
| 0.8343161946307757 | 0.3392719973822945 | 0.2819143393262035 | F F F | C071 |
| 0.9177142131142438 | 0.4396855957677991 | 0.2791941258854080 | F F F | C072 |
| 0.9152224682187599 | 0.3743125385744329 | 0.4776866471177007 | F F F | C073 |
| 0.9987637083020692 | 0.4745121839579621 | 0.4820904337443102 | F F F | C074 |
| 0.8343752338398105 | 0.4727858347939105 | 0.2797783658481017 | F F F | C075 |
| 0.9176557484917762 | 0.3722780318220071 | 0.2803069253055866 | F F F | C076 |
| 0.9152069631099504 | 0.4415697402200363 | 0.4813520209748164 | F F F | C077 |
| 0.9988974230458147 | 0.5417326303004982 | 0.4833717622278816 | F F F | C078 |
| 0.0010896780846690 | 0.5402276665027511 | 0.2803806383541929 | F F F | C079 |
| 0.0844147168852616 | 0.6410149111951463 | 0.2834132444208290 | F F F | C080 |
| 0.0820106104157512 | 0.5748294800260626 | 0.4827003746536826 | F F F | C081 |
| 0.1650800245777449 | 0.6743856811896054 | 0.4812563292692176 | F F F | C082 |
| 0.0011494012863688 | 0.6728296037949901 | 0.2861737160777795 | F F F | C083 |
| 0.0844307225588043 | 0.5732487457008156 | 0.2807354436850225 | F F F | C084 |
| 0.0821580148593087 | 0.6425536721413083 | 0.4823542477369118 | F F F | C085 |
| 0.1677592695793439 | 0.5402575854331063 | 0.2792549674160965 | F F F | C086 |
| 0.2511522226894682 | 0.6410621507413529 | 0.2819623339502237 | F F F | C087 |
| 0.2482524468811301 | 0.5747886199692562 | 0.4820355518945587 | F F F | C088 |
| 0.3310894556168500 | 0.6743206642344781 | 0.4808907867040684 | F F F | C089 |
| 0.1677878060508511 | 0.6729179153511682 | 0.2839232726264277 | F F F | C090 |

|                    |                    |                    |       |      |
|--------------------|--------------------|--------------------|-------|------|
| 0.2511060033166664 | 0.5732762179091631 | 0.2798277671851040 | F F F | C091 |
| 0.2477654464606527 | 0.6423421525785887 | 0.4814565102811118 | F F F | C092 |
| 0.3344178943117345 | 0.5402397009034856 | 0.2791485183732506 | F F F | C093 |
| 0.4178635621144234 | 0.6410009842767775 | 0.2822321098769078 | F F F | C094 |
| 0.4148312621881781 | 0.5755679370607518 | 0.4833416827996023 | F F F | C095 |
| 0.4983657027601222 | 0.6763728314508386 | 0.4820456198405735 | F F F | C096 |
| 0.3344566898103963 | 0.6729322336450400 | 0.2829606707649748 | F F F | C097 |
| 0.4177728326796091 | 0.5732272168778322 | 0.2803815870930451 | F F F | C098 |
| 0.4139741384250105 | 0.6432655878378722 | 0.4818082207565502 | F F F | C099 |
| 0.5010793168915446 | 0.5401792369072015 | 0.2802431741513018 | F F F | C100 |
| 0.5844660091159987 | 0.6409158459353231 | 0.2845898335966948 | F F F | C101 |
| 0.5811262452300987 | 0.5761097509266384 | 0.4885608240760924 | F F F | C102 |
| 0.6656396947682662 | 0.6745356900818470 | 0.5048953595958274 | F F F | C103 |
| 0.5011108073220597 | 0.6728193717325276 | 0.2841301664540008 | F F F | C104 |
| 0.5844282219860871 | 0.5731619353484558 | 0.2821061671165912 | F F F | C105 |
| 0.5788470526464320 | 0.6438561446626188 | 0.4909435083319301 | F F F | C106 |
| 0.6677568875063171 | 0.5401441420250156 | 0.2816134613100255 | F F F | C107 |
| 0.7510514107661362 | 0.6409290916309890 | 0.2863765329253803 | F F F | C108 |
| 0.7492107067537678 | 0.5752971665939300 | 0.4889315600807242 | F F F | C109 |
| 0.8326413334360783 | 0.6744647722074566 | 0.4886288399503115 | F F F | C110 |
| 0.6677222754227965 | 0.6727789703487070 | 0.2874048586811460 | F F F | C111 |
| 0.7510930446089144 | 0.5731739521599354 | 0.2831097843424180 | F F F | C112 |

|                    |                    |                    |       |       |
|--------------------|--------------------|--------------------|-------|-------|
| 0.7519749777972990 | 0.6424683607715013 | 0.4927229580240037 | F F F | C113  |
| 0.8344220003513751 | 0.5401781120239486 | 0.2815713586922216 | F F F | C114  |
| 0.9177095991819042 | 0.6409514564631540 | 0.2854679817641615 | F F F | C115  |
| 0.9158125874241838 | 0.5749538427496481 | 0.4849675997714241 | F F F | C116  |
| 0.9987865695199720 | 0.6744691937682290 | 0.4832521880393058 | F F F | C117  |
| 0.8344702960803131 | 0.6727731682349518 | 0.2880270509960479 | F F F | C118  |
| 0.9177605701781296 | 0.5732049976545137 | 0.2822715888391425 | F F F | C119  |
| 0.9166888736983309 | 0.6424936828583906 | 0.4854086109118846 | F F F | C120  |
| 0.6705584984527109 | 0.7280360755646152 | 0.5424337562991518 | T T T | C121  |
| 0.4931222923355237 | 0.7691437895169553 | 0.4720648768797336 | F F F | As001 |
| 0.6782713065519286 | 0.7735881776657597 | 0.5777243945157891 | T T T | O001  |

**OUTCAR**

INCAR:

POTCAR: PAW\_PBE H 15Jun2001

POTCAR: PAW\_PBE C 08Apr2002

POTCAR: PAW\_PBE As 22Sep2009

POTCAR: PAW\_PBE O 08Apr2002

-----

|  |   |   |     |       |    |   |    |    |   |      |     |  |
|--|---|---|-----|-------|----|---|----|----|---|------|-----|--|
|  |   |   |     |       |    |   |    |    |   |      |     |  |
|  | W | W | AA  | RRRRR | N  | N | II | N  | N | GGGG | !!! |  |
|  | W | W | A A | R R   | NN | N | II | NN | N | G G  | !!! |  |
|  | W | W | A A | R R   | NN | N | II | NN | N | G    | !!! |  |

W WW W AAAAAA RRRRR N NN II N NN G GGG !

WW WW A A R R N NN II N NN G G

W W A A R R N N II N N GGGG !!!

For optimal performance we recommend to set

NCORE= 4 - approx SQRT( number of cores)

NCORE specifies how many cores store one orbital (NPAR=cpu/NCORE).

This setting can greatly improve the performance of VASP for DFT.

The default, NCORE=1 might be grossly inefficient

on modern multi-core architectures or massively parallel machines.

Do your own testing !!!!

Unfortunately you need to use the default for GW and RPA calculations.

(for HF NCORE is supported but not extensively tested yet)

-----

POTCAR: PAW\_PBE H 15Jun2001

SHA256 = 030f79b5d3ab3cf0e668861823c8fb652ff669f3e15e46930bd03bfd63a607b6 H/

COPYR = (c) Copyright 15Jun2001 Georg Kresse

COPYR = This file is part of the software VASP. Any use, copying, and all ot

COPYR = If you do not have a valid VASP license, you may not use, copy or di

VRHFIN =H: ultrasoft test

LEXCH = PE

EATOM = 12.4884 eV, 0.9179 Ry

TITEL = PAW\_PBE H 15Jun2001

LULTRA = F use ultrasoft PP ?

IUNSCR = 0 unscreen: 0-lin 1-nonlin 2-no

RPACOR = 0.000 partial core radius

POMASS = 1.000; ZVAL = 1.000 mass and valenz

RCORE = 1.100 outmost cutoff radius

RWIGS = 0.700; RWIGS = 0.370 wigner-seitz radius (au A)

ENMAX = 250.000; ENMIN = 200.000 eV

RCLOC = 0.701 cutoff for local pot

LCOR = T correct aug charges

LPAW = T paw PP

EAUG = 400.000

RMAX = 1.123 core radius for proj-oper

RAUG = 1.200 factor for augmentation sphere

RDEP = 1.112 radius for radial grids

RDEPT = 0.926 core radius for aug-charge

Atomic configuration

2 entries

| n | l | j    | E       | occ.   |
|---|---|------|---------|--------|
| 1 | 0 | 0.50 | -6.4927 | 1.0000 |
| 2 | 1 | 0.50 | -3.4015 | 0.0000 |

Description

| l | E          | TYP | RCUT  | TYP | RCUT |
|---|------------|-----|-------|-----|------|
| 0 | -6.4927494 | 23  | 1.100 |     |      |
| 0 | 6.8029130  | 23  | 1.100 |     |      |
| 1 | -4.0817478 | 23  | 1.100 |     |      |

local pseudopotential read in

atomic valenz-charges read in

non local Contribution for L= 0 read in

real space projection operators read in

non local Contribution for L= 0 read in

real space projection operators read in

non local Contribution for L= 1 read in

real space projection operators read in

PAW grid and wavefunctions read in

number of l-projection operators is LMAX = 3

number of lm-projection operators is LMMAX = 5

POTCAR: PAW\_PBE C 08Apr2002

SHA256 = 253f7b50bb8d59471dbedb8285d89021f4a42ed1a2c5d38a03a736e69125dd95 C/

COPYR = (c) Copyright 08Apr2002 Georg Kresse

COPYR = This file is part of the software VASP. Any use, copying, and all ot

COPYR = If you do not have a valid VASP license, you may not use, copy or di

VRHFIN =C: s2p2

LEXCH = PE

EATOM = 147.1560 eV, 10.8157 Ry

TITEL = PAW\_PBE C 08Apr2002

LULTRA = F use ultrasoft PP ?

IUNSCR = 1 unscreen: 0-lin 1-nonlin 2-no

RPACOR = 1.200 partial core radius

POMASS = 12.011; ZVAL = 4.000 mass and valenz

RCORE = 1.500 outmost cutoff radius

RWIGS = 1.630; RWIGS = 0.863 wigner-seitz radius (au A)

ENMAX = 400.000; ENMIN = 300.000 eV

ICORE = 2 local potential

LCOR = T correct aug charges

LPAW = T paw PP

EAUG = 644.873

DEXC = 0.000  
 RMAX = 1.529 core radius for proj-oper  
 RAUG = 1.300 factor for augmentation sphere  
 RDEP = 1.501 radius for radial grids  
 RDEPT = 1.300 core radius for aug-charge

Atomic configuration

4 entries

| n | l | j    | E         | occ.   |
|---|---|------|-----------|--------|
| 1 | 0 | 0.50 | -273.3789 | 2.0000 |
| 2 | 0 | 0.50 | -13.7508  | 2.0000 |
| 2 | 1 | 0.50 | -5.2854   | 2.0000 |
| 3 | 2 | 1.50 | -5.4423   | 0.0000 |

Description

| l | E           | TYP | RCUT  | TYP | RCUT |
|---|-------------|-----|-------|-----|------|
| 0 | -13.7508458 | 23  | 1.200 |     |      |
| 0 | -8.2022199  | 23  | 1.200 |     |      |
| 1 | -5.2854383  | 23  | 1.500 |     |      |
| 1 | 34.0145650  | 23  | 1.500 |     |      |
| 2 | -5.4423304  | 7   | 1.500 |     |      |

local pseudopotential read in

partial core-charges read in

partial kinetic energy density read in

atomic valenz-charges read in

non local Contribution for L= 0 read in

real space projection operators read in

non local Contribution for L= 0 read in

real space projection operators read in

non local Contribution for L= 1 read in

real space projection operators read in

non local Contribution for L= 1 read in

real space projection operators read in

PAW grid and wavefunctions read in

number of l-projection operators is LMAX = 4

number of lm-projection operators is LMMAX = 8

POTCAR: PAW\_PBE As 22Sep2009

SHA256 = bc8fb55b00baa90d383a523722e1771deb40ea3f17a5ce25913641995975acad As

COPYR = (c) Copyright 22Sep2009 Georg Kresse

COPYR = This file is part of the software VASP. Any use, copying, and all ot

COPYR = If you do not have a valid VASP license, you may not use, copy or di

VRHFIN =As: s2p3

LEXCH = PE

EATOM = 170.1867 eV, 12.5084 Ry

TITEL = PAW\_PBE As 22Sep2009

LULTRA = F use ultrasoft PP ?

IUNSCR = 1 unscreen: 0-lin 1-nonlin 2-no

RPACOR = 1.900 partial core radius

POMASS = 74.922; ZVAL = 5.000 mass and valenz

RCORE = 2.100 outmost cutoff radius

RWIGS = 2.300; RWIGS = 1.217 wigner-seitz radius (au A)

ENMAX = 208.702; ENMIN = 156.526 eV

ICORE = 3 local potential

LCOR = T correct aug charges

LPAW = T paw PP

EAUG = 462.758

DEXC = 0.000

RMAX = 2.144 core radius for proj-oper

RAUG = 1.300 factor for augmentation sphere

RDEP = 2.140 radius for radial grids

RDEPT = 1.956 core radius for aug-charge

Atomic configuration

10 entries

| n | l | j    | E           | occ.    |
|---|---|------|-------------|---------|
| 1 | 0 | 0.50 | -11718.0418 | 2.0000  |
| 2 | 0 | 0.50 | -1486.5454  | 2.0000  |
| 2 | 1 | 1.50 | -1303.3889  | 6.0000  |
| 3 | 0 | 0.50 | -190.2849   | 2.0000  |
| 3 | 1 | 1.50 | -133.6555   | 6.0000  |
| 3 | 2 | 2.50 | -40.6443    | 10.0000 |
| 4 | 0 | 0.50 | -14.4936    | 2.0000  |
| 4 | 1 | 0.50 | -5.1947     | 3.0000  |
| 4 | 2 | 1.50 | -5.4423     | 0.0000  |
| 4 | 3 | 2.50 | -5.4423     | 0.0000  |

Description

| l | E           | TYP | RCUT  | TYP | RCUT |
|---|-------------|-----|-------|-----|------|
| 0 | -14.4935570 | 23  | 2.100 |     |      |
| 0 | -11.9212055 | 23  | 2.100 |     |      |
| 1 | -5.1947127  | 23  | 2.100 |     |      |
| 1 | 27.2116520  | 23  | 2.100 |     |      |
| 2 | -5.4423304  | 23  | 2.100 |     |      |
| 3 | -1.3605826  | 7   | 2.100 |     |      |

local pseudopotential read in

partial core-charges read in

partial kinetic energy density read in

atomic valenz-charges read in

non local Contribution for L= 0 read in

real space projection operators read in

non local Contribution for L= 0 read in

real space projection operators read in

non local Contribution for L= 1 read in

real space projection operators read in

non local Contribution for L= 1 read in

real space projection operators read in

non local Contribution for L= 2 read in

real space projection operators read in

PAW grid and wavefunctions read in

number of l-projection operators is LMAX = 5

number of lm-projection operators is LMMAX = 13

POTCAR: PAW\_PBE O 08Apr2002

SHA256 = 818f92134a0a090dccd8ba1447fa70422a3b330e708bb4f08108d8ae51209ddf O/

COPYR = (c) Copyright 08Apr2002 Georg Kresse

COPYR = This file is part of the software VASP. Any use, copying, and all ot

COPYR = If you do not have a valid VASP license, you may not use, copy or di

VRHFIN =O: s2p4

LEXCH = PE

EATOM = 432.3788 eV, 31.7789 Ry

TITEL = PAW\_PBE O 08Apr2002

LULTRA = F use ultrasoft PP ?

IUNSCR = 1 unscreen: 0-lin 1-nonlin 2-no

RPACOR = 1.200 partial core radius

POMASS = 16.000; ZVAL = 6.000 mass and valenz

RCORE = 1.520 outmost cutoff radius

RWIGS = 1.550; RWIGS = 0.820 wigner-seitz radius (au A)

ENMAX = 400.000; ENMIN = 300.000 eV

ICORE = 2 local potential

LCOR = T correct aug charges

LPAW = T paw PP

EAUG = 605.392

DEXC = 0.000

RMAX = 1.553 core radius for proj-oper

RAUG = 1.300 factor for augmentation sphere

RDEP = 1.550 radius for radial grids

RDEPT = 1.329 core radius for aug-charge

Atomic configuration

4 entries

| n | l | j    | E         | occ.   |
|---|---|------|-----------|--------|
| 1 | 0 | 0.50 | -514.6923 | 2.0000 |
| 2 | 0 | 0.50 | -23.9615  | 2.0000 |
| 2 | 1 | 0.50 | -9.0305   | 4.0000 |
| 3 | 2 | 1.50 | -9.5241   | 0.0000 |

Description

| 1 | E           | TYP | RCUT  | TYP | RCUT |
|---|-------------|-----|-------|-----|------|
| 0 | -23.9615318 | 23  | 1.200 |     |      |
| 0 | -9.5240782  | 23  | 1.200 |     |      |
| 1 | -9.0304911  | 23  | 1.520 |     |      |
| 1 | 8.1634956   | 23  | 1.520 |     |      |
| 2 | -9.5240782  | 7   | 1.500 |     |      |

local pseudopotential read in

partial core-charges read in

partial kinetic energy density read in

kinetic energy density of atom read in

atomic valenz-charges read in

non local Contribution for L= 0 read in

real space projection operators read in

non local Contribution for L= 0 read in

real space projection operators read in

non local Contribution for L= 1 read in

real space projection operators read in

non local Contribution for L= 1 read in

real space projection operators read in

PAW grid and wavefunctions read in

number of l-projection operators is LMAX = 4

number of lm-projection operators is LMMAX = 8

Optimization of the real space projectors (new method)

maximal supplied QI-value = 34.20

optimisation between [QCUT,QGAM] = [ 9.92, 20.18] = [ 27.55,114.04] Ry

Optimized for a Real-space Cutoff 1.26 Angstroem

| l | n(q) | QCUT  | max X(q) | W(low)/X(q) | W(high)/X(q) | e(spline) |
|---|------|-------|----------|-------------|--------------|-----------|
| 0 | 8    | 9.919 | 19.460   | 0.50E-03    | 0.23E-03     | 0.29E-06  |
| 0 | 8    | 9.919 | 12.209   | 0.48E-03    | 0.23E-03     | 0.28E-06  |
| 1 | 7    | 9.919 | 4.655    | 0.17E-03    | 0.75E-03     | 0.30E-06  |

Optimization of the real space projectors (new method)

maximal supplied QI-value = 25.13

optimisation between [QCUT,QGAM] = [ 10.05, 20.36] = [ 28.30,116.06] Ry

Optimized for a Real-space Cutoff 1.30 Angstroem

| 1 | n(q) | QCUT   | max X(q) | W(low)/X(q) | W(high)/X(q) | e(spline) |
|---|------|--------|----------|-------------|--------------|-----------|
| 0 | 8    | 10.053 | 115.676  | 0.49E-03    | 0.72E-03     | 0.18E-06  |
| 0 | 8    | 10.053 | 87.132   | 0.49E-03    | 0.71E-03     | 0.18E-06  |
| 1 | 7    | 10.053 | 4.429    | 0.32E-03    | 0.31E-03     | 0.18E-06  |
| 1 | 7    | 10.053 | 2.733    | 0.23E-03    | 0.19E-03     | 0.20E-06  |

Optimization of the real space projectors (new method)

maximal supplied QI-value = 17.95

optimisation between [QCUT,QGAM] = [ 10.23, 20.47] = [ 29.32,117.29] Ry

Optimized for a Real-space Cutoff 1.30 Angstroem

| 1 | n(q) | QCUT   | max X(q) | W(low)/X(q) | W(high)/X(q) | e(spline) |
|---|------|--------|----------|-------------|--------------|-----------|
| 0 | 8    | 10.233 | 117.213  | 0.22E-03    | 0.22E-03     | 0.48E-07  |
| 0 | 8    | 10.233 | 98.411   | 0.22E-03    | 0.22E-03     | 0.48E-07  |
| 1 | 7    | 10.233 | 10.093   | 0.11E-03    | 0.37E-03     | 0.86E-07  |
| 1 | 7    | 10.233 | 5.228    | 0.12E-03    | 0.33E-03     | 0.71E-07  |
| 2 | 7    | 10.233 | 4.067    | 0.22E-03    | 0.22E-03     | 0.50E-07  |

Optimization of the real space projectors (new method)

maximal supplied QI-value = 24.76

optimisation between [QCUT, QGAM] = [ 10.15, 20.30] = [ 28.85, 115.39] Ry

Optimized for a Real-space Cutoff 1.38 Angstroem

| l | n(q) | QCUT   | max X(q) | W(low)/X(q) | W(high)/X(q) | e(spline) |
|---|------|--------|----------|-------------|--------------|-----------|
| 0 | 8    | 10.150 | 20.381   | 0.22E-03    | 0.32E-03     | 0.29E-06  |
| 0 | 8    | 10.150 | 15.268   | 0.23E-03    | 0.35E-03     | 0.30E-06  |
| 1 | 8    | 10.150 | 5.964    | 0.46E-03    | 0.53E-03     | 0.21E-06  |
| 1 | 8    | 10.150 | 5.382    | 0.38E-03    | 0.45E-03     | 0.19E-06  |

PAW\_PBE H 15Jun2001 :

energy of atom 1 EATOM= -12.4884

kinetic energy error for atom= 0.0098 (will be added to EATOM!!)

PAW\_PBE C 08Apr2002 :

energy of atom 2 EATOM= -147.1560

kinetic energy error for atom= 0.0288 (will be added to EATOM!!)

PAW\_PBE As 22Sep2009 :

energy of atom 3 EATOM= -170.1867

kinetic energy error for atom= 0.0013 (will be added to EATOM!!)

PAW\_PBE O 08Apr2002 :

energy of atom 4 EATOM= -432.3788

kinetic energy error for atom= 0.1156 (will be added to EATOM!!)

POSCAR: Generated by VASPKIT code

positions in direct lattice

No initial velocities read in

exchange correlation table for LEXCH = 8

RHO(1)= 0.500 N(1) = 2000

RHO(2)= 100.500 N(2) = 4000

VTST: version 3.2, (02/03/18)

CHAIN: initializing optimizer

OPT: Using VASP Dynamics algorithm

CHAIN: Read ICHAIN 0

POSCAR: Generated by VASPKIT code

positions in direct lattice

No initial velocities read in

-----

ion position nearest neighbor table

|    |       |       |        |     |      |
|----|-------|-------|--------|-----|------|
| 1  | 0.084 | 0.189 | 0.295- | 25  | 1.09 |
| 2  | 0.082 | 0.191 | 0.458- | 28  | 1.09 |
| 3  | 0.251 | 0.189 | 0.295- | 30  | 1.09 |
| 4  | 0.249 | 0.191 | 0.458- | 33  | 1.09 |
| 5  | 0.418 | 0.189 | 0.295- | 35  | 1.09 |
| 6  | 0.416 | 0.191 | 0.458- | 38  | 1.09 |
| 7  | 0.584 | 0.189 | 0.295- | 40  | 1.09 |
| 8  | 0.582 | 0.192 | 0.458- | 43  | 1.09 |
| 9  | 0.751 | 0.189 | 0.295- | 45  | 1.09 |
| 10 | 0.748 | 0.192 | 0.458- | 48  | 1.09 |
| 11 | 0.918 | 0.189 | 0.295- | 50  | 1.09 |
| 12 | 0.915 | 0.191 | 0.458- | 53  | 1.09 |
| 13 | 0.165 | 0.726 | 0.480- | 106 | 1.09 |
| 14 | 0.001 | 0.724 | 0.289- | 107 | 1.09 |
| 15 | 0.329 | 0.725 | 0.481- | 113 | 1.09 |
| 16 | 0.168 | 0.724 | 0.286- | 114 | 1.09 |
| 17 | 0.334 | 0.724 | 0.285- | 121 | 1.09 |
| 18 | 0.833 | 0.726 | 0.489- | 134 | 1.09 |
| 19 | 0.668 | 0.724 | 0.290- | 135 | 1.09 |

|    |       |       |        |     |      |    |              |
|----|-------|-------|--------|-----|------|----|--------------|
| 20 | 0.999 | 0.726 | 0.483- | 141 | 1.09 |    |              |
| 21 | 0.834 | 0.724 | 0.291- | 142 | 1.09 |    |              |
| 22 | 0.501 | 0.724 | 0.286- | 128 | 1.09 |    |              |
| 23 | 0.436 | 0.766 | 0.402- | 146 | 1.54 |    |              |
| 24 | 0.582 | 0.772 | 0.428- | 146 | 1.54 |    |              |
| 25 | 0.084 | 0.240 | 0.291- | 1   | 1.09 | 27 | 1.41 32 1.41 |
| 26 | 0.165 | 0.274 | 0.468- | 33  | 1.41 | 28 | 1.41 29 1.45 |
| 27 | 0.001 | 0.272 | 0.287- | 25  | 1.41 | 50 | 1.41 55 1.45 |
| 28 | 0.082 | 0.242 | 0.464- | 2   | 1.09 | 26 | 1.41 51 1.41 |
| 29 | 0.165 | 0.341 | 0.475- | 57  | 1.42 | 65 | 1.42 26 1.45 |
| 30 | 0.251 | 0.240 | 0.291- | 3   | 1.09 | 37 | 1.41 32 1.41 |
| 31 | 0.332 | 0.274 | 0.468- | 38  | 1.41 | 33 | 1.41 34 1.45 |
| 32 | 0.168 | 0.272 | 0.287- | 30  | 1.41 | 25 | 1.41 63 1.45 |
| 33 | 0.249 | 0.242 | 0.463- | 4   | 1.09 | 26 | 1.41 31 1.41 |
| 34 | 0.332 | 0.341 | 0.475- | 65  | 1.42 | 73 | 1.42 31 1.45 |
| 35 | 0.418 | 0.240 | 0.291- | 5   | 1.09 | 42 | 1.41 37 1.41 |
| 36 | 0.499 | 0.274 | 0.468- | 43  | 1.41 | 38 | 1.41 39 1.45 |
| 37 | 0.334 | 0.272 | 0.287- | 30  | 1.41 | 35 | 1.41 71 1.45 |
| 38 | 0.415 | 0.242 | 0.463- | 6   | 1.09 | 31 | 1.41 36 1.41 |
| 39 | 0.499 | 0.342 | 0.475- | 73  | 1.42 | 81 | 1.42 36 1.45 |
| 40 | 0.584 | 0.240 | 0.291- | 7   | 1.09 | 42 | 1.41 47 1.41 |
| 41 | 0.665 | 0.274 | 0.468- | 43  | 1.41 | 48 | 1.41 44 1.45 |

|    |       |       |        |          |          |          |
|----|-------|-------|--------|----------|----------|----------|
| 42 | 0.501 | 0.272 | 0.287- | 35 1.41  | 40 1.41  | 79 1.45  |
| 43 | 0.582 | 0.243 | 0.463- | 8 1.09   | 36 1.41  | 41 1.41  |
| 44 | 0.665 | 0.342 | 0.475- | 89 1.42  | 81 1.42  | 41 1.45  |
| 45 | 0.751 | 0.240 | 0.291- | 9 1.09   | 47 1.41  | 52 1.41  |
| 46 | 0.832 | 0.274 | 0.468- | 48 1.41  | 53 1.41  | 49 1.45  |
| 47 | 0.668 | 0.272 | 0.287- | 45 1.41  | 40 1.41  | 87 1.45  |
| 48 | 0.748 | 0.243 | 0.463- | 10 1.09  | 46 1.41  | 41 1.41  |
| 49 | 0.832 | 0.342 | 0.475- | 97 1.42  | 89 1.42  | 46 1.45  |
| 50 | 0.918 | 0.240 | 0.291- | 11 1.09  | 52 1.41  | 27 1.41  |
| 51 | 0.999 | 0.274 | 0.468- | 53 1.41  | 28 1.41  | 54 1.45  |
| 52 | 0.834 | 0.272 | 0.287- | 50 1.41  | 45 1.41  | 95 1.45  |
| 53 | 0.915 | 0.242 | 0.463- | 12 1.09  | 51 1.41  | 46 1.41  |
| 54 | 0.999 | 0.341 | 0.475- | 57 1.42  | 97 1.42  | 51 1.45  |
| 55 | 0.001 | 0.339 | 0.282- | 100 1.42 | 60 1.42  | 27 1.45  |
| 56 | 0.084 | 0.440 | 0.279- | 59 1.42  | 67 1.42  | 60 1.44  |
| 57 | 0.082 | 0.374 | 0.477- | 54 1.42  | 29 1.42  | 61 1.44  |
| 58 | 0.165 | 0.474 | 0.481- | 61 1.42  | 69 1.42  | 62 1.43  |
| 59 | 0.001 | 0.473 | 0.279- | 56 1.42  | 96 1.42  | 103 1.44 |
| 60 | 0.084 | 0.372 | 0.280- | 63 1.42  | 55 1.42  | 56 1.44  |
| 61 | 0.082 | 0.441 | 0.481- | 98 1.42  | 58 1.42  | 57 1.44  |
| 62 | 0.165 | 0.542 | 0.482- | 112 1.42 | 105 1.42 | 58 1.43  |
| 63 | 0.168 | 0.339 | 0.281- | 60 1.42  | 68 1.42  | 32 1.45  |

64 0.251 0.440 0.278- 67 1.42 75 1.42 68 1.44  
65 0.249 0.374 0.477- 34 1.42 29 1.42 69 1.44  
66 0.332 0.475 0.482- 69 1.42 77 1.42 70 1.44  
67 0.168 0.473 0.278- 64 1.42 56 1.42 110 1.44  
68 0.251 0.372 0.280- 71 1.42 63 1.42 64 1.44  
69 0.249 0.442 0.481- 66 1.42 58 1.42 65 1.44  
70 0.332 0.542 0.483- 112 1.42 119 1.42 66 1.44  
71 0.334 0.339 0.281- 68 1.42 76 1.42 37 1.45  
72 0.418 0.440 0.279- 75 1.42 83 1.42 76 1.44  
73 0.415 0.375 0.477- 39 1.42 34 1.42 77 1.44  
74 0.498 0.475 0.483- 77 1.42 85 1.42 78 1.44  
75 0.334 0.473 0.278- 72 1.42 64 1.42 117 1.44  
76 0.418 0.372 0.280- 79 1.42 71 1.42 72 1.44  
77 0.415 0.442 0.481- 74 1.42 66 1.42 73 1.44  
78 0.498 0.543 0.485- 119 1.42 126 1.42 74 1.44  
79 0.501 0.339 0.282- 76 1.42 84 1.42 42 1.45  
80 0.584 0.440 0.279- 83 1.42 91 1.42 84 1.44  
81 0.582 0.375 0.478- 39 1.42 44 1.42 85 1.44  
82 0.665 0.475 0.485- 85 1.42 93 1.42 86 1.44  
83 0.501 0.473 0.279- 80 1.42 72 1.42 124 1.44  
84 0.584 0.372 0.280- 87 1.42 79 1.42 80 1.44  
85 0.582 0.442 0.482- 74 1.42 82 1.42 81 1.44

86 0.665 0.543 0.489- 133 1.42 126 1.43 82 1.44

87 0.668 0.339 0.282- 84 1.42 92 1.42 47 1.45

88 0.751 0.440 0.280- 99 1.42 91 1.42 92 1.44

89 0.749 0.375 0.478- 44 1.42 49 1.42 93 1.44

90 0.832 0.475 0.483- 101 1.42 93 1.42 94 1.44

91 0.668 0.473 0.280- 88 1.42 80 1.42 131 1.44

92 0.751 0.372 0.281- 95 1.42 87 1.42 88 1.44

93 0.748 0.442 0.482- 90 1.42 82 1.42 89 1.44

94 0.832 0.542 0.486- 140 1.42 133 1.42 90 1.44

95 0.834 0.339 0.282- 92 1.42 100 1.42 52 1.45

96 0.918 0.440 0.279- 59 1.42 99 1.42 100 1.44

97 0.915 0.374 0.478- 49 1.42 54 1.42 101 1.44

98 0.999 0.475 0.482- 61 1.42 101 1.42 102 1.43

99 0.834 0.473 0.280- 88 1.42 96 1.42 138 1.44

100 0.918 0.372 0.280- 55 1.42 95 1.42 96 1.44

101 0.915 0.442 0.481- 90 1.42 98 1.42 97 1.44

102 0.999 0.542 0.483- 105 1.42 140 1.42 98 1.43

103 0.001 0.540 0.280- 143 1.42 108 1.42 59 1.44

104 0.084 0.641 0.283- 107 1.41 114 1.41 108 1.45

105 0.082 0.575 0.483- 102 1.42 62 1.42 109 1.44

106 0.165 0.674 0.481- 13 1.09 116 1.40 109 1.40

107 0.001 0.673 0.286- 14 1.09 104 1.41 139 1.41

108 0.084 0.573 0.281- 110 1.42 103 1.42 104 1.45  
109 0.082 0.643 0.482- 106 1.40 141 1.41 105 1.44  
110 0.168 0.540 0.279- 108 1.42 115 1.42 67 1.44  
111 0.251 0.641 0.282- 121 1.41 114 1.41 115 1.45  
112 0.248 0.575 0.482- 70 1.42 62 1.42 116 1.44  
113 0.331 0.674 0.481- 15 1.09 123 1.39 116 1.41  
114 0.168 0.673 0.284- 16 1.09 111 1.41 104 1.41  
115 0.251 0.573 0.280- 117 1.42 110 1.42 111 1.45  
116 0.248 0.642 0.481- 106 1.40 113 1.41 112 1.44  
117 0.334 0.540 0.279- 115 1.42 122 1.42 75 1.44  
118 0.418 0.641 0.282- 128 1.41 121 1.41 122 1.45  
119 0.415 0.576 0.483- 78 1.42 70 1.42 123 1.44  
120 0.498 0.676 0.482- 130 1.39 123 1.43 146 1.99  
121 0.334 0.673 0.283- 17 1.09 111 1.41 118 1.41  
122 0.418 0.573 0.280- 124 1.42 117 1.42 118 1.45  
123 0.414 0.643 0.482- 113 1.39 120 1.43 119 1.44  
124 0.501 0.540 0.280- 122 1.42 129 1.42 83 1.44  
125 0.584 0.641 0.285- 135 1.41 128 1.41 129 1.45  
126 0.581 0.576 0.489- 78 1.42 86 1.43 130 1.45  
127 0.666 0.675 0.505- 145 1.34 130 1.46 137 1.47  
128 0.501 0.673 0.284- 22 1.09 118 1.41 125 1.41  
129 0.584 0.573 0.282- 131 1.42 124 1.42 125 1.45

130 0.579 0.644 0.491- 120 1.39 126 1.45 127 1.46  
 131 0.668 0.540 0.282- 129 1.42 136 1.42 91 1.44  
 132 0.751 0.641 0.286- 135 1.41 142 1.41 136 1.45  
 133 0.749 0.575 0.489- 94 1.42 86 1.42 137 1.44  
 134 0.833 0.674 0.489- 18 1.09 137 1.38 144 1.42  
 135 0.668 0.673 0.287- 19 1.09 132 1.41 125 1.41  
 136 0.751 0.573 0.283- 138 1.42 131 1.42 132 1.45  
 137 0.752 0.642 0.493- 134 1.38 133 1.44 127 1.47  
 138 0.834 0.540 0.282- 136 1.42 143 1.42 99 1.44  
 139 0.918 0.641 0.285- 142 1.41 107 1.41 143 1.45  
 140 0.916 0.575 0.485- 102 1.42 94 1.42 144 1.44  
 141 0.999 0.674 0.483- 20 1.09 144 1.39 109 1.41  
 142 0.834 0.673 0.288- 21 1.09 139 1.41 132 1.41  
 143 0.918 0.573 0.282- 103 1.42 138 1.42 139 1.45  
 144 0.917 0.642 0.485- 141 1.39 134 1.42 140 1.44  
 145 0.671 0.728 0.542- 147 1.17 127 1.34  
 146 0.493 0.769 0.472- 24 1.54 23 1.54 120 1.99  
 147 0.678 0.774 0.578- 145 1.17

LATTYP: Found a simple orthorhombic cell.

ALAT = 14.7806000000

B/A-ratio = 1.2466138046

C/A-ratio = 1.4433717170

Lattice vectors:

A1 = (-14.7806000000, 0.0000000000, 0.0000000000)

A2 = ( 0.0000000000, 0.0000000000, -18.4257000000)

A3 = ( 0.0000000000, -21.3339000000, 0.0000000000)

Analysis of symmetry for initial positions (statically):

=====

Subroutine PRICEL returns:

Original cell was already a primitive cell.

Routine SETGRP: Setting up the symmetry group for a  
simple orthorhombic supercell.

Subroutine GETGRP returns: Found 1 space group operations

(whereof 1 operations were pure point group operations)

out of a pool of 8 trial point group operations.

The static configuration has the point symmetry  $C_1$  .

Analysis of symmetry for dynamics (positions and initial velocities):

---

Subroutine PRICEL returns:

Original cell was already a primitive cell.

Routine SETGRP: Setting up the symmetry group for a  
simple orthorhombic supercell.

Subroutine GETGRP returns: Found 1 space group operations  
(whereof 1 operations were pure point group operations)  
out of a pool of 8 trial point group operations.

The dynamic configuration has the point symmetry  $C_1$  .

Analysis of constrained symmetry for selective dynamics:

---

Subroutine PRICEL returns:

Original cell was already a primitive cell.

Routine SETGRP: Setting up the symmetry group for a  
simple orthorhombic supercell.

Subroutine GETGRP returns: Found 1 space group operations  
(whereof 1 operations were pure point group operations)  
out of a pool of 8 trial point group operations.

The constrained configuration has the point symmetry  $C_1$ .

Analysis of structural, dynamic, and magnetic symmetry:

---

Subroutine PRICEL returns:

Original cell was already a primitive cell.

Routine SETGRP: Setting up the symmetry group for a  
simple orthorhombic supercell.

Subroutine GETGRP returns: Found 1 space group operations  
(whereof 1 operations were pure point group operations)  
out of a pool of 8 trial point group operations.

The magnetic configuration has the point symmetry  $C_1$ .

Subroutine INISYM returns: Found 1 space group operations  
(whereof 1 operations are pure point group operations),  
and found 1 'primitive' translations

KPOINTS: KPT-Resolved Value to Generate K-Mesh: 0

Automatic generation of k-mesh.

Space group operators:

| irotn | det(A)   | alpha    | n_x      | n_y      | n_z      | tau_x    | tau_y    | tau_z    |
|-------|----------|----------|----------|----------|----------|----------|----------|----------|
| 1     | 1.000000 | 0.000000 | 1.000000 | 0.000000 | 0.000000 | 0.000000 | 0.000000 | 0.000000 |

Subroutine IBZKPT returns following result:

=====

Found 1 irreducible k-points:

Following reciprocal coordinates:

| Coordinates |          |          | Weight   |
|-------------|----------|----------|----------|
| 0.000000    | 0.000000 | 0.000000 | 1.000000 |

Following cartesian coordinates:

| Coordinates |          |          | Weight   |
|-------------|----------|----------|----------|
| 0.000000    | 0.000000 | 0.000000 | 1.000000 |

Subroutine IBZKPT\_HF returns following result:

=====  
Found 1 k-points in 1st BZ

the following 1 k-points will be used (e.g. in the exchange kernel)

Following reciprocal coordinates: # in IRBZ

0.000000 0.000000 0.000000 1.00000000 1 t-inv F

-----  
Dimension of arrays:

|                   |         |        |                    |         |       |           |
|-------------------|---------|--------|--------------------|---------|-------|-----------|
| k-points          | NKPTS = | 1      | k-points in BZ     | NKDIM = | 1     | number of |
| bands             | NBANDS= | 480    |                    |         |       |           |
| number of dos     | NEDOS = | 301    | number of ions     | NIONS = | 147   |           |
| non local maximal | LDIM =  | 5      | non local SUM 2l+1 | LMDIM = | 13    |           |
| total plane-waves | NPLWV = | 699840 |                    |         |       |           |
| max r-space proj  | IRMAX = | 1377   | max aug-charges    | IRDMAX= | 5183  |           |
| dimension x,y,z   | NGX =   | 72     | NGY =              | 108     | NGZ = | 90        |

dimension x,y,z NGXF= 144 NGYF= 216 NGZF= 180

support grid NGXF= 144 NGYF= 216 NGZF= 180

ions per type = 24 121 1 1

NGX,Y,Z is equivalent to a cutoff of 8.10, 8.42, 8.12 a.u.

NGXF,Y,Z is equivalent to a cutoff of 16.20, 16.83, 16.24 a.u.

SYSTEM = Al2O3 Cell opt

POSCAR = Generated by VASPKIT code

Startparameter for this run:

NWRITE = 2 write-flag & timer

PREC = normal normal or accurate (medium, high low for compatibility)

ISTART = 0 job : 0-new 1-cont 2-samecut

ICHARG = 1 charge: 1-file 2-atom 10-const

ISPIN = 2 spin polarized calculation?

LNONCOLLINEAR = F non collinear calculations

LSORBIT = F spin-orbit coupling

INIWAV = 1 electr: 0-lowe 1-rand 2-diag

LASPH = F aspherical Exc in radial PAW

METAGGA= F non-selfconsistent MetaGGA calc.

Electronic Relaxation 1

ENCUT = 400.0 eV 29.40 Ry 5.42 a.u. 24.10 34.79 30.05\*2\*pi/ulx,y,z  
 ENINI = 400.0 initial cutoff  
 ENAUG = 644.9 eV augmentation charge cutoff  
 NELM = 200; NELMIN= 5; NELMDL= 0 # of ELM steps  
 EDIFF = 0.1E-06 stopping-criterion for ELM  
 LREAL = T real-space projection  
 NLSPLINE = F spline interpolate recip. space projectors  
 LCOMPAT= F compatible to vasp.4.4  
 GGA\_COMPAT = T GGA compatible to vasp.4.4-vasp.4.6  
 LMAXPAW = -100 max onsite density  
 LMAXMIX = 2 max onsite mixed and CHGCAR  
 VOSKOWN= 0 Vosko Wilk Nusair interpolation  
 ROPT = -0.00050 -0.00050 -0.00050 -0.00050

#### Ionic relaxation

EDIFFG = -.1E-01 stopping-criterion for IOM  
 NSW = 1801 number of steps for IOM  
 NBLOCK = 1; KBLOCK = 1801 inner block; outer block  
 IBRION = 5 ionic relax: 0-MD 1-quasi-New 2-CG  
 NFREE = 2 steps in history (QN), initial steepest desc. (CG)  
 ISIF = 2 stress and relaxation  
 IWAVPR = 11 prediction: 0-non 1-charg 2-wave 3-comb  
 ISYM = 2 0-nonsym 1-usesym 2-fastsym

LCORR = T Harris-Foulkes like correction to forces

POTIM = 0.5000 time-step for ionic-motion

TEIN = 0.0 initial temperature

TEBEG = 0.0; TEEND = 0.0 temperature during run

SMASS = -3.00 Nose mass-parameter (am)

estimated Nose-frequency (Omega) = 0.10E-29 period in steps =\*\*\*\*\* mass= -0.499E-26a.u.

SCALEE = 1.0000 scale energy and forces

NPACO = 256; APACO = 16.0 distance and # of slots for P.C.

PSTRESS= 0.0 pullay stress

Mass of Ions in am

POMASS = 1.00 12.01 74.92 16.00

Ionic Valenz

ZVAL = 1.00 4.00 5.00 6.00

Atomic Wigner-Seitz radii

RWIGS = -1.00 -1.00 -1.00 -1.00

virtual crystal weights

VCA = 1.00 1.00 1.00 1.00

NELECT = 519.0000 total number of electrons

NUPDOWN= -1.0000 fix difference up-down

DOS related values:

EMIN = 10.00; EMAX = -10.00 energy-range for DOS

EFERMI = 0.00

ISMEAR = 0; SIGMA = 0.05 broadening in eV -4-tet -1-fermi 0-gaus

Electronic relaxation 2 (details)

IALGO = 48 algorithm

LDIAG = T sub-space diagonalisation (order eigenvalues)

LSUBROT= F optimize rotation matrix (better conditioning)

TURBO = 0 0=normal 1=particle mesh

IRESTART = 0 0=no restart 2=restart with 2 vectors

NREBOOT = 0 no. of reboots

NMIN = 0 reboot dimension

EREF = 0.00 reference energy to select bands

IMIX = 4 mixing-type and parameters

AMIX = 0.40; BMIX = 1.00

AMIX\_MAG = 1.60; BMIX\_MAG = 1.00

AMIN = 0.10

WC = 100.; INIMIX= 1; MIXPRE= 1; MAXMIX= -45

Intra band minimization:

WEIMIN = 0.0010 energy-eigenvalue tresh-hold

EBREAK = 0.52E-10 absolut break condition

DEPER = 0.30 relativ break condition

TIME = 0.40 timestep for ELM

volume/ion in A,a.u. = 39.52 266.73

Fermi-wavevector in a.u.,A,eV,Ry = 0.731816 1.382932 7.286662 0.535555

Thomas-Fermi vector in A = 1.824126

#### Write flags

LWAVE = F write WAVECAR

LDOWNSAMPLE = F k-point downsampling of WAVECAR

LCHARG = F write CHGCAR

LVTOT = F write LOCPOT, total local potential

LVHAR = F write LOCPOT, Hartree potential only

LELF = F write electronic localiz. function (ELF)

LORBIT = 11 0 simple, 1 ext, 2 COOP (PROOUT), +10 PAW based schemes

#### Dipole corrections

LMONO = F monopole corrections only (constant potential shift)

LDIPOL = F correct potential (dipole corrections)

IDIPOL = 0 1-x, 2-y, 3-z, 4-all directions

EPSILON= 1.0000000 bulk dielectric constant

Exchange correlation treatment:

GGA = PE GGA type

LEXCH = 8 internal setting for exchange type

VOSKOWN= 0 Vosko Wilk Nusair interpolation

LHFCALC = F Hartree Fock is set to

LHFONE = F Hartree Fock one center treatment

AEXX = 0.0000 exact exchange contribution

Linear response parameters

LEPSILON= F determine dielectric tensor

LRPA = F only Hartree local field effects (RPA)

LNABLA = F use nabla operator in PAW spheres

LEVEL = F velocity operator in full k-point grid

LINTERFAST= F fast interpolation

KINTER = 0 interpolate to denser k-point grid

CSHIFT =0.1000 complex shift for real part using Kramers Kronig

OMEGAMAX= -1.0 maximum frequency

DEG\_THRESHOLD= 0.2000000E-02 threshold for treating states as degenerate

RTIME = -0.100 relaxation time in fs

(WPLASMAI= 0.000 imaginary part of plasma frequency in eV, 0.658/RTIME)

DFIELD = 0.0000000 0.0000000 0.0000000 field for delta impulse in time

Orbital magnetization related:

ORBITALMAG= F switch on orbital magnetization

LCHIMAG = F perturbation theory with respect to B field

DQ = 0.001000 dq finite difference perturbation B field

LLRAUG = F two centre corrections for induced B field

---

finite differences

using selective dynamics as specified on POSCAR

charge density and potential will be updated during run

spin polarized calculation

RMM-DIIS sequential band-by-band

perform sub-space diagonalisation

before iterative eigenvector-optimisation

modified Broyden-mixing scheme, WC = 100.0

initial mixing is a Kerker type mixing with AMIX = 0.4000 and BMIX = 1.0000

Hartree-type preconditioning will be used

using additional bands 220

real space projection scheme for non local part

use partial core corrections

calculate Harris-corrections to forces

(improved forces if not selfconsistent)

use gradient corrections

use of overlap-Matrix (Vanderbilt PP)

Gauss-broadening in eV SIGMA = 0.05

-----

energy-cutoff : 400.00

volume of cell : 5810.14

direct lattice vectors

reciprocal lattice vectors

|             |             |             |             |             |             |
|-------------|-------------|-------------|-------------|-------------|-------------|
| 14.78060000 | 0.00000000  | 0.00000000  | 0.067656252 | 0.00000000  | 0.00000000  |
| 0.00000000  | 21.33390000 | 0.00000000  | 0.00000000  | 0.046873755 | 0.00000000  |
| 0.00000000  | 0.00000000  | 18.42570000 | 0.00000000  | 0.00000000  | 0.054272022 |

length of vectors

14.780600000 21.333900000 18.425700000 0.067656252 0.046873755 0.054272022

k-points in units of  $2\pi/\text{SCALE}$  and weight: KPT-Resolved Value to Generate K-Mesh: 0

0.00000000 0.00000000 0.00000000 1.000

k-points in reciprocal lattice and weights: KPT-Resolved Value to Generate K-Mesh: 0

0.00000000 0.00000000 0.00000000 1.000

position of ions in fractional coordinates (direct lattice)

0.08428274 0.18884013 0.29522843

0.08188032 0.19104864 0.45790738

0.25091135 0.18884950 0.29522062

0.24897373 0.19111988 0.45788761

0.41754554 0.18883267 0.29520849

0.41573565 0.19138191 0.45767334

0.58422044 0.18880781 0.29516844

0.58207284 0.19158801 0.45756155

0.75093544 0.18879988 0.29517734

0.74829221 0.19153512 0.45756678

|            |            |            |
|------------|------------|------------|
| 0.91762947 | 0.18881066 | 0.29522465 |
| 0.91480770 | 0.19126690 | 0.45770229 |
| 0.16524434 | 0.72564005 | 0.48042912 |
| 0.00115985 | 0.72402336 | 0.28898145 |
| 0.32883678 | 0.72547845 | 0.48118836 |
| 0.16779839 | 0.72413128 | 0.28631851 |
| 0.33448032 | 0.72416441 | 0.28485699 |
| 0.83320760 | 0.72571907 | 0.48856265 |
| 0.66761267 | 0.72399155 | 0.28990787 |
| 0.99879534 | 0.72572069 | 0.48299467 |
| 0.83446171 | 0.72396973 | 0.29096773 |
| 0.50115880 | 0.72401958 | 0.28572238 |
| 0.43627872 | 0.76611746 | 0.40196470 |
| 0.58188711 | 0.77231281 | 0.42834152 |
| 0.08426191 | 0.23993778 | 0.29062693 |
| 0.16531700 | 0.27369050 | 0.46798354 |
| 0.00093332 | 0.27164729 | 0.28686726 |
| 0.08190675 | 0.24206562 | 0.46356484 |
| 0.16531844 | 0.34120845 | 0.47478893 |
| 0.25091382 | 0.23994502 | 0.29056680 |
| 0.33205673 | 0.27389030 | 0.46789157 |
| 0.16758530 | 0.27166182 | 0.28677155 |

|            |            |            |
|------------|------------|------------|
| 0.24875792 | 0.24213689 | 0.46348332 |
| 0.33203235 | 0.34142732 | 0.47475906 |
| 0.41756385 | 0.23992798 | 0.29059031 |
| 0.49869141 | 0.27417823 | 0.46787590 |
| 0.33424150 | 0.27165580 | 0.28674090 |
| 0.41546358 | 0.24238815 | 0.46332848 |
| 0.49867462 | 0.34170159 | 0.47495178 |
| 0.58424078 | 0.23990915 | 0.29063785 |
| 0.66521877 | 0.27428917 | 0.46800783 |
| 0.50090929 | 0.27163239 | 0.28683393 |
| 0.58197526 | 0.24258483 | 0.46335207 |
| 0.66519898 | 0.34176133 | 0.47527063 |
| 0.75093708 | 0.23990639 | 0.29066891 |
| 0.83179889 | 0.27405837 | 0.46803355 |
| 0.66759814 | 0.27161833 | 0.28692444 |
| 0.74845506 | 0.24252901 | 0.46342529 |
| 0.83178460 | 0.34158282 | 0.47516930 |
| 0.91760701 | 0.23991335 | 0.29068386 |
| 0.99853555 | 0.27373706 | 0.46806036 |
| 0.83428146 | 0.27162422 | 0.28693203 |
| 0.91507465 | 0.24226414 | 0.46349477 |
| 0.99854996 | 0.34124651 | 0.47497731 |

|            |            |            |
|------------|------------|------------|
| 0.00096995 | 0.33928635 | 0.28168088 |
| 0.08435990 | 0.43970463 | 0.27850255 |
| 0.08192173 | 0.37408030 | 0.47737038 |
| 0.16522605 | 0.47447649 | 0.48146927 |
| 0.00103628 | 0.47280922 | 0.27898454 |
| 0.08430353 | 0.37229212 | 0.27992142 |
| 0.08191983 | 0.44135945 | 0.48073163 |
| 0.16513023 | 0.54163217 | 0.48216009 |
| 0.16761635 | 0.33929188 | 0.28144661 |
| 0.25100251 | 0.43970172 | 0.27817991 |
| 0.24865985 | 0.37422137 | 0.47724064 |
| 0.33184537 | 0.47479610 | 0.48167398 |
| 0.16769756 | 0.47282154 | 0.27825006 |
| 0.25096356 | 0.37229092 | 0.27974041 |
| 0.24869712 | 0.44153690 | 0.48054904 |
| 0.33169385 | 0.54209768 | 0.48252496 |
| 0.33427908 | 0.33928626 | 0.28142891 |
| 0.41765439 | 0.43967687 | 0.27850948 |
| 0.41531716 | 0.37454209 | 0.47740240 |
| 0.49847796 | 0.47518754 | 0.48273510 |
| 0.33435448 | 0.47280697 | 0.27825255 |
| 0.41763093 | 0.37227069 | 0.27991643 |

|            |            |            |
|------------|------------|------------|
| 0.41536786 | 0.44186011 | 0.48093900 |
| 0.49822737 | 0.54266748 | 0.48461371 |
| 0.50094456 | 0.33926955 | 0.28167805 |
| 0.58434713 | 0.43966180 | 0.27925273 |
| 0.58190163 | 0.37478741 | 0.47792841 |
| 0.66510701 | 0.47543401 | 0.48456325 |
| 0.50103057 | 0.47278129 | 0.27899284 |
| 0.58430449 | 0.37225541 | 0.28034477 |
| 0.58189604 | 0.44213878 | 0.48222447 |
| 0.66501153 | 0.54291235 | 0.48850029 |
| 0.66763558 | 0.33926634 | 0.28193723 |
| 0.75105643 | 0.43966611 | 0.27958548 |
| 0.74850191 | 0.37471384 | 0.47803800 |
| 0.83204665 | 0.47480446 | 0.48320558 |
| 0.66772003 | 0.47276556 | 0.27984332 |
| 0.75099850 | 0.37225957 | 0.28051135 |
| 0.74841732 | 0.44204872 | 0.48239100 |
| 0.83234427 | 0.54212155 | 0.48556849 |
| 0.83431619 | 0.33927200 | 0.28191434 |
| 0.91771421 | 0.43968560 | 0.27919413 |
| 0.91522247 | 0.37431254 | 0.47768665 |
| 0.99876371 | 0.47451218 | 0.48209043 |

|            |            |            |
|------------|------------|------------|
| 0.83437523 | 0.47278583 | 0.27977837 |
| 0.91765575 | 0.37227803 | 0.28030693 |
| 0.91520696 | 0.44156974 | 0.48135202 |
| 0.99889742 | 0.54173263 | 0.48337176 |
| 0.00108968 | 0.54022767 | 0.28038064 |
| 0.08441472 | 0.64101491 | 0.28341324 |
| 0.08201061 | 0.57482948 | 0.48270037 |
| 0.16508002 | 0.67438568 | 0.48125633 |
| 0.00114940 | 0.67282960 | 0.28617372 |
| 0.08443072 | 0.57324875 | 0.28073544 |
| 0.08215801 | 0.64255367 | 0.48235425 |
| 0.16775927 | 0.54025759 | 0.27925497 |
| 0.25115222 | 0.64106215 | 0.28196233 |
| 0.24825245 | 0.57478862 | 0.48203555 |
| 0.33108946 | 0.67432066 | 0.48089079 |
| 0.16778781 | 0.67291792 | 0.28392327 |
| 0.25110600 | 0.57327622 | 0.27982777 |
| 0.24776545 | 0.64234215 | 0.48145651 |
| 0.33441789 | 0.54023970 | 0.27914852 |
| 0.41786356 | 0.64100098 | 0.28223211 |
| 0.41483126 | 0.57556794 | 0.48334168 |
| 0.49836570 | 0.67637283 | 0.48204562 |

|            |            |            |
|------------|------------|------------|
| 0.33445669 | 0.67293223 | 0.28296067 |
| 0.41777283 | 0.57322722 | 0.28038159 |
| 0.41397414 | 0.64326559 | 0.48180822 |
| 0.50107932 | 0.54017924 | 0.28024317 |
| 0.58446601 | 0.64091585 | 0.28458983 |
| 0.58112625 | 0.57610975 | 0.48856082 |
| 0.66563969 | 0.67453569 | 0.50489536 |
| 0.50111081 | 0.67281937 | 0.28413017 |
| 0.58442822 | 0.57316194 | 0.28210617 |
| 0.57884705 | 0.64385614 | 0.49094351 |
| 0.66775689 | 0.54014414 | 0.28161346 |
| 0.75105141 | 0.64092909 | 0.28637653 |
| 0.74921071 | 0.57529717 | 0.48893156 |
| 0.83264133 | 0.67446477 | 0.48862884 |
| 0.66772228 | 0.67277897 | 0.28740486 |
| 0.75109304 | 0.57317395 | 0.28310978 |
| 0.75197498 | 0.64246836 | 0.49272296 |
| 0.83442200 | 0.54017811 | 0.28157136 |
| 0.91770960 | 0.64095146 | 0.28546798 |
| 0.91581259 | 0.57495384 | 0.48496760 |
| 0.99878657 | 0.67446919 | 0.48325219 |
| 0.83447030 | 0.67277317 | 0.28802705 |

0.91776057 0.57320500 0.28227159  
0.91668887 0.64249368 0.48540861  
0.67055850 0.72803608 0.54243376  
0.49312229 0.76914379 0.47206488  
0.67827131 0.77358818 0.57772439

position of ions in cartesian coordinates (Angst):

1.24574954 4.02869645 5.43979041  
1.21024019 4.07581253 8.43726398  
3.70862031 4.02889640 5.43964651  
3.67998110 4.07733251 8.43689982  
6.17157362 4.02853730 5.43942303  
6.14482229 4.08292244 8.43295171  
8.63512858 4.02800700 5.43868514  
8.60338587 4.08731953 8.43089191  
11.09927640 4.02783767 5.43884914  
11.06020784 4.08619100 8.43098817  
13.56311415 4.02806769 5.43972086  
13.52140675 4.08046891 8.43348514  
2.44241045 15.48073228 8.85224276  
0.01714329 15.44624202 5.32468554  
4.86040485 15.47728475 8.86623232

2.48016083 15.44854438 5.27561892  
4.94381979 15.44925102 5.24868943  
12.31530821 15.48241801 9.00210881  
9.86771590 15.44556328 5.34175539  
14.76279437 15.48245265 8.89951487  
12.33384480 15.44509788 5.36128403  
7.40742774 15.44616132 5.26463480  
6.44846123 16.34427327 7.40648105  
8.60064057 16.47644434 7.89249226  
1.24544159 5.11880857 5.35500457  
2.44348447 5.83888568 8.62292425  
0.01379510 5.79529612 5.28573012  
1.21063093 5.16420382 8.54150671  
2.44350576 7.27930703 8.74831846  
3.70865680 5.11896317 5.35389675  
4.90799772 5.84314818 8.62122979  
2.47701125 5.79560619 5.28396654  
3.67679133 5.16572412 8.54000455  
4.90763733 7.28397624 8.74776806  
6.17184431 5.11859945 5.35432996  
7.37095832 5.84929098 8.62094089  
4.94028986 5.79547769 5.28340186

|             |             |            |
|-------------|-------------|------------|
| 6.14080105  | 5.17108459  | 8.53715151 |
| 7.37071008  | 7.28982754  | 8.75131899 |
| 8.63542933  | 5.11819790  | 5.35520577 |
| 9.83233251  | 5.85165762  | 8.62337183 |
| 7.40373985  | 5.79497816  | 5.28511603 |
| 8.60194351  | 5.17528049  | 8.53758614 |
| 9.83203999  | 7.29110207  | 8.75719411 |
| 11.09930058 | 5.11813883  | 5.35577819 |
| 12.29448669 | 5.84673391  | 8.62384580 |
| 9.86750113  | 5.79467828  | 5.28678371 |
| 11.06261487 | 5.17408955  | 8.53893540 |
| 12.29427543 | 7.28729373  | 8.75532706 |
| 13.56278217 | 5.11828732  | 5.35605354 |
| 14.75895454 | 5.83987900  | 8.62433975 |
| 12.33118059 | 5.79480405  | 5.28692356 |
| 13.52535236 | 5.16843899  | 8.54021560 |
| 14.75916747 | 7.28011901  | 8.75178945 |
| 0.01433640  | 7.23830099  | 5.19016741 |
| 1.24688988  | 9.38061471  | 5.13160436 |
| 1.21085233  | 7.98059169  | 8.79588339 |
| 2.44214010  | 10.12243403 | 8.87140832 |
| 0.01531688  | 10.08686464 | 5.14048537 |

1.24605669 7.94244291 5.15774803  
1.21082417 9.41591828 8.85781675  
2.44072381 11.55512646 8.88413716  
2.47747021 7.23841895 5.18585079  
3.70996763 9.38055261 5.12565949  
3.67534182 7.98360125 8.79349277  
4.90487369 10.12925257 8.87518021  
2.47867062 10.08712741 5.12695206  
3.70939194 7.94241725 5.15441295  
3.67589271 9.41970405 8.85445248  
4.90263409 11.56505766 8.89086006  
4.94084537 7.23829915 5.18552464  
6.17318240 9.38002243 5.13173213  
6.13863688 7.99044345 8.79647348  
7.36780335 10.13760353 8.89473216  
4.94195979 10.08681662 5.12699798  
6.17283567 7.94198563 5.15765608  
6.13938618 9.42659932 8.86163771  
7.36409940 11.57721374 8.92934676  
7.40426122 7.23794266 5.19011520  
8.63700113 9.37970096 5.14542709  
8.60085530 7.99567721 8.80616549

9.83068060 10.14286164 8.92841702  
7.40553244 10.08626877 5.14063835  
8.63637089 7.94165973 5.16554864  
8.60077264 9.43254448 8.88532342  
9.82926935 11.58243773 9.00095979  
9.86805449 7.23787415 5.19489091  
11.10106460 9.37979293 5.15155826  
11.06330738 7.99410762 8.80818483  
12.29814879 10.12943095 8.90340104  
9.86930266 10.08593309 5.15630915  
11.10020843 7.94174853 5.16861790  
11.06205706 9.43062308 8.88839179  
12.30254778 11.56556701 8.94693933  
12.33169395 7.23799486 5.19446904  
13.56436670 9.38020853 5.14434721  
13.52753721 7.98554627 8.80171085  
14.76232687 10.12319548 8.88285371  
12.33256658 10.08636572 5.15511224  
13.56350256 7.94214230 5.16485131  
13.52730804 9.42040468 8.86924793  
14.76430325 11.55726976 8.90646308  
0.01610610 11.52516301 5.16620953

1.24770016 13.67534801 5.22208742  
1.21216603 12.26335464 8.89409229  
2.43998181 14.38727668 8.86748475  
0.01698884 14.35407948 5.27295104  
1.24793674 12.22963142 5.17274706  
1.21434475 13.70817579 8.88771466  
2.47958266 11.52580130 5.14546825  
3.71218054 13.67635582 5.19535338  
3.66932012 12.26248294 8.88184247  
4.89370081 14.38588962 8.86074937  
2.48000445 14.35596351 5.23148504  
3.71149739 12.23021751 5.15602249  
3.66212196 13.70366325 8.87117322  
4.94289713 11.52541976 5.14350685  
6.17627417 13.67505090 5.20032419  
6.13145495 12.27910881 8.90590884  
7.36614411 14.42967035 8.88202798  
4.94347055 14.35626898 5.21374843  
6.17493313 12.22917212 5.16622701  
6.11878615 13.72336372 8.87765373  
7.40625295 11.52412982 5.16367665  
8.63875829 13.67323457 5.24376690

8.58939458 12.29066782 9.00207518  
9.83855407 14.39047696 9.30305043  
7.40671840 14.35386119 5.23529721  
8.63819978 12.22777941 5.19800360  
8.55570675 13.73596260 9.04597780  
9.86984745 11.52338111 5.18892515  
11.10099048 13.67351715 5.27668808  
11.07378377 12.27333222 9.00890625  
12.30693849 14.38896400 9.00332842  
9.86933586 14.35299928 5.29563570  
11.10160586 12.22803578 5.21649595  
11.11464136 13.70635576 9.07876541  
12.33325782 11.52410582 5.18814938  
13.56429850 13.67399428 5.25994739  
13.53625953 12.26600779 8.93586750  
14.76266477 14.38905833 8.90425984  
12.33397166 14.35287549 5.30710003  
13.56505188 12.22869810 5.20105161  
13.54921157 13.70689598 8.94399344  
9.91125694 15.53184883 9.99472166  
7.28864335 16.40883669 8.69812580  
10.02525687 16.50365282 10.64497638

---

k-point 1 : 0.0000 0.0000 0.0000 plane waves: 105525

maximum and minimum number of plane-waves per node : 105525 105525

maximum number of plane-waves: 105525

maximum index in each direction:

IXMAX= 24 IYMAX= 34 IZMAX= 30

IXMIN= -24 IYMIN= -34 IZMIN= -30

serial 3D FFT for wavefunctions

parallel 3D FFT for charge:

minimum data exchange during FFTs selected (reduces bandwidth)

total amount of memory used by VASP MPI-rank0 132380. kBytes

---

---

base : 30000. kBytes

nonlr-proj: 13792. kBytes

fftplans : 5354. kBytes

grid : 63770. kBytes

one-center: 2384. kBytes

wavefun : 17080. kBytes

INWAV: cpu time 0.0000: real time 0.0000

Broyden mixing: mesh for mixing (old mesh)

NGX = 49 NGY = 69 NGZ = 61

(NGX =144 NGY =216 NGZ =180)

gives a total of 206241 points

initial charge density was supplied:

charge density of overlapping atoms calculated

number of electron 519.0000000 magnetization 147.0000000

keeping initial charge density in first step

---

Maximum index for non-local projection operator 1292

Maximum index for augmentation-charges 154 (set IRDMAX)

-----

First call to EWALD: gamma= 0.099

Maximum number of real-space cells 3x 2x 3

Maximum number of reciprocal cells 2x 3x 3

FEWALD: cpu time 0.0064: real time 0.0070

----- Iteration 1( 1) -----

POTLOK: cpu time 0.2319: real time 0.2569

SETDIJ: cpu time 0.0110: real time 0.0112

EDDIAG: cpu time 1.9671: real time 1.9786

RMM-DIIS:  cpu time    3.8414: real time    3.8654

  ORTHCH:  cpu time    0.3618: real time    0.3630

    DOS:  cpu time    0.0019: real time    0.0025

-----

  LOOP:  cpu time    6.4153: real time    6.4775

eigenvalue-minimisations :  960

total energy-change (2. order) : 0.6253145E+04  (-0.1156169E+05)

number of electron       519.0000000 magnetization       147.0000000

augmentation part       519.0000000 magnetization       147.0000000

Free energy of the ion-electron system (eV)

-----

alpha Z       PSCENC =       233.50077011

Ewald energy   TEWEN =       91329.23020906

-Hartree energ DENC =   -105102.20925185

-exchange     EXHF =       0.00000000

-V(xc)+E(xc)  XCENC =       1690.14211936

PAW double counting =   13652.10586829  -13700.47723969

entropy T\*S   EENTRO =       -0.05422273

eigenvalues   EBANDS =       -553.42276431

atomic energy  EATOM =       18704.32991668

Solvation Ediel\_sol = 0.00000000

-----

free energy TOTEN = 6253.14540493 eV

energy without entropy = 6253.19962766 energy(sigma->0) = 6253.17251630

-----

----- Iteration 1( 2) -----

EDDIAG: cpu time 1.9617: real time 1.9683

RMM-DIIS: cpu time 3.8223: real time 3.8364

ORTHCH: cpu time 0.3571: real time 0.3584

DOS: cpu time 0.0004: real time 0.0004

-----

LOOP: cpu time 6.1415: real time 6.1635

eigenvalue-minimisations : 960

total energy-change (2. order) :-0.3969773E+04 (-0.4892682E+04)

number of electron 519.0000000 magnetization 147.0000000

augmentation part 519.0000000 magnetization 147.0000000

Free energy of the ion-electron system (eV)

-----

alpha Z PSCENC = 233.50077011

Ewald energy TEWEN = 91329.23020906

-Hartree energy DENC = -105102.20925185

-exchange EXHF = 0.00000000

-V(xc)+E(xc) XCENC = 1690.14211936

PAW double counting = 13652.10586829 -13700.47723969

entropy T\*S EENTRO = -0.01417874

eigenvalues EBANDS = -4523.23543262

atomic energy EATOM = 18704.32991668

Solvation Ediel\_sol = 0.00000000

-----

free energy TOTEN = 2283.37278062 eV

energy without entropy = 2283.38695936 energy(sigma->0) = 2283.37986999

-----

----- Iteration 1( 3) -----

|           |          |         |           |        |
|-----------|----------|---------|-----------|--------|
| EDDIAG:   | cpu time | 1.9257: | real time | 1.9378 |
| RMM-DIIS: | cpu time | 3.8092: | real time | 3.8321 |
| ORTHCH:   | cpu time | 0.3619: | real time | 0.3631 |
| DOS:      | cpu time | 0.0004: | real time | 0.0004 |

-----

|       |          |         |           |        |
|-------|----------|---------|-----------|--------|
| LOOP: | cpu time | 6.0972: | real time | 6.1334 |
|-------|----------|---------|-----------|--------|

eigenvalue-minimisations : 960

total energy-change (2. order) :-0.1553959E+04 (-0.2326767E+04)

|                    |             |               |             |
|--------------------|-------------|---------------|-------------|
| number of electron | 519.0000000 | magnetization | 147.0000000 |
|--------------------|-------------|---------------|-------------|

|                   |             |               |             |
|-------------------|-------------|---------------|-------------|
| augmentation part | 519.0000000 | magnetization | 147.0000000 |
|-------------------|-------------|---------------|-------------|

Free energy of the ion-electron system (eV)

---

alpha Z        PSCENC =        233.50077011

Ewald energy    TEWEN =        91329.23020906

-Hartree energ DENC =    -105102.20925185

-exchange       EXHF =            0.00000000

-V(xc)+E(xc)    XCENC =        1690.14211936

PAW double counting =    13652.10586829    -13700.47723969

entropy T\*S     EENTRO =        -0.01300233

eigenvalues     EBANDS =        -6077.19580200

atomic energy   EATOM =        18704.32991668

Solvation    Ediel\_sol =        0.00000000

---

free energy     TOTEN =        729.41358765 eV

energy without entropy =    729.42658998    energy(sigma->0) =    729.42008881

---

----- Iteration 1( 4) -----

EDDIAG: cpu time 1.9457: real time 1.9529

RMM-DIIS: cpu time 3.8199: real time 3.8331

ORTHCH: cpu time 0.3577: real time 0.3591

DOS: cpu time 0.0004: real time 0.0004

-----

LOOP: cpu time 6.1238: real time 6.1456

eigenvalue-minimisations : 960

total energy-change (2. order) :-0.1425630E+04 (-0.1105763E+04)

number of electron 519.0000000 magnetization 147.0000000

augmentation part 519.0000000 magnetization 147.0000000

Free energy of the ion-electron system (eV)

-----

alpha Z PSCENC = 233.50077011

Ewald energy TEWEN = 91329.23020906

-Hartree energ DENC = -105102.20925185

-exchange EXHF = 0.00000000

-V(xc)+E(xc) XCENC = 1690.14211936

PAW double counting = 13652.10586829 -13700.47723969

entropy T\*S EENTRO = -0.01007327

eigenvalues EBANDS = -7502.82879182

atomic energy EATOM = 18704.32991668

Solvation Ediel\_sol = 0.00000000

-----  
free energy TOTEN = -696.21647311 eV

energy without entropy = -696.20639984 energy(sigma->0) = -696.21143648

----- Iteration 1( 5) -----

EDDIAG: cpu time 1.9308: real time 1.9374

RMM-DIIS: cpu time 3.8115: real time 3.8324

ORTHCH: cpu time 0.3575: real time 0.3587

DOS: cpu time 0.0004: real time 0.0004

-----

LOOP: cpu time 6.1002: real time 6.1290

eigenvalue-minimisations : 960

total energy-change (2. order) :-0.3740123E+03 (-0.3261586E+03)

number of electron 519.0000000 magnetization 147.0000000

augmentation part 519.0000000 magnetization 147.0000000

Free energy of the ion-electron system (eV)

-----

alpha Z PSCENC = 233.50077011

Ewald energy TEWEN = 91329.23020906

-Hartree energ DENC = -105102.20925185

-exchange EXHF = 0.00000000

-V(xc)+E(xc) XCENC = 1690.14211936

PAW double counting = 13652.10586829 -13700.47723969

entropy T\*S EENTRO = -0.02800851

eigenvalues EBANDS = -7876.82311217

atomic energy EATOM = 18704.32991668

Solvation Ediel\_sol = 0.00000000

-----

free energy TOTEN = -1070.22872870 eV

energy without entropy = -1070.20072019 energy(sigma->0) = -1070.21472445

-----

----- Iteration 1( 6) -----

|           |          |         |           |        |
|-----------|----------|---------|-----------|--------|
| EDDIAG:   | cpu time | 1.9279: | real time | 1.9591 |
| RMM-DIIS: | cpu time | 3.8199: | real time | 3.8325 |
| ORTHCH:   | cpu time | 0.3587: | real time | 0.3600 |
| DOS:      | cpu time | 0.0004: | real time | 0.0004 |

-----

|       |          |         |           |        |
|-------|----------|---------|-----------|--------|
| LOOP: | cpu time | 6.1070: | real time | 6.1520 |
|-------|----------|---------|-----------|--------|

eigenvalue-minimisations : 960

total energy-change (2. order) :-0.9724909E+02 (-0.8301419E+02)

number of electron      519.0000000 magnetization      147.0000000  
augmentation part      519.0000000 magnetization      147.0000000

Free energy of the ion-electron system (eV)

-----

alpha Z      PSCENC =      233.50077011

Ewald energy      TEWEN =      91329.23020906

-Hartree energy      DENC =      -105102.20925185

-exchange      EXHF =      0.00000000

-V(xc)+E(xc)      XCENC =      1690.14211936

PAW double counting      =      13652.10586829      -13700.47723969

entropy T\*S      EENTRO =      -0.03209245

eigenvalues      EBANDS =      -7974.06811402

atomic energy      EATOM =      18704.32991668

Solvation      Ediel\_sol =      0.00000000

-----

free energy      TOTEN =      -1167.47781449 eV

energy without entropy =      -1167.44572204      energy(sigma->0) =      -1167.46176826

-----

----- Iteration 1( 7) -----

|           |          |         |           |        |
|-----------|----------|---------|-----------|--------|
| EDDIAG:   | cpu time | 1.9395: | real time | 1.9458 |
| RMM-DIIS: | cpu time | 3.8170: | real time | 3.8308 |
| ORTHCH:   | cpu time | 0.3577: | real time | 0.3588 |
| DOS:      | cpu time | 0.0004: | real time | 0.0004 |

-----

|       |          |         |           |        |
|-------|----------|---------|-----------|--------|
| LOOP: | cpu time | 6.1146: | real time | 6.1359 |
|-------|----------|---------|-----------|--------|

eigenvalue-minimisations : 960

total energy-change (2. order) :-0.2480899E+02 (-0.2290662E+02)

|                    |             |               |             |
|--------------------|-------------|---------------|-------------|
| number of electron | 519.0000000 | magnetization | 147.0000000 |
|--------------------|-------------|---------------|-------------|

|                   |             |               |             |
|-------------------|-------------|---------------|-------------|
| augmentation part | 519.0000000 | magnetization | 147.0000000 |
|-------------------|-------------|---------------|-------------|

Free energy of the ion-electron system (eV)

-----

|         |          |              |
|---------|----------|--------------|
| alpha Z | PSCENC = | 233.50077011 |
|---------|----------|--------------|

Ewald energy TEWEN = 91329.23020906

-Hartree energy DENC = -105102.20925185

-exchange EXHF = 0.00000000

-V(xc)+E(xc) XCENC = 1690.14211936

PAW double counting = 13652.10586829 -13700.47723969

entropy T\*S EENTRO = -0.04483185

eigenvalues EBANDS = -7998.86436560

atomic energy EATOM = 18704.32991668

Solvation Ediel\_sol = 0.00000000

-----

free energy TOTEN = -1192.28680547 eV

energy without entropy = -1192.24197362 energy(sigma->0) = -1192.26438955

-----

----- Iteration 1( 8) -----

EDDIAG: cpu time 1.9278: real time 1.9343  
RMM-DIIS: cpu time 3.8175: real time 3.8316  
ORTHCH: cpu time 0.3585: real time 0.3597  
DOS: cpu time 0.0004: real time 0.0004

-----

LOOP: cpu time 6.1042: real time 6.1260

eigenvalue-minimisations : 960

total energy-change (2. order) :-0.7651671E+01 (-0.6908152E+01)

number of electron 519.0000000 magnetization 147.0000000

augmentation part 519.0000000 magnetization 147.0000000

Free energy of the ion-electron system (eV)

-----

alpha Z PSCENC = 233.50077011

Ewald energy TEWEN = 91329.23020906

-Hartree energ DENC = -105102.20925185

-exchange EXHF = 0.00000000

-V(xc)+E(xc) XCENC = 1690.14211936

PAW double counting = 13652.10586829 -13700.47723969

entropy T\*S EENTRO = -0.04322998

eigenvalues EBANDS = -8006.51763842

atomic energy EATOM = 18704.32991668

Solvation Ediel\_sol = 0.00000000

-----  
free energy TOTEN = -1199.93847642 eV

energy without entropy = -1199.89524644 energy(sigma->0) = -1199.91686143

-----  
----- Iteration 1( 9) -----

EDDIAG: cpu time 1.9238: real time 1.9299

RMM-DIIS: cpu time 7.9039: real time 7.9377

ORTHCH: cpu time 0.3583: real time 0.3593

DOS: cpu time 0.0004: real time 0.0004  
-----

LOOP: cpu time 10.1865: real time 10.2273

eigenvalue-minimisations : 2041

total energy-change (2. order) :-0.3417799E+01 (-0.3288551E+01)

number of electron 519.0000000 magnetization 147.0000000

augmentation part 519.0000000 magnetization 147.0000000

Free energy of the ion-electron system (eV)

-----

alpha Z PSCENC = 233.50077011

Ewald energy TEWEN = 91329.23020906

-Hartree energy DENC = -105102.20925185

-exchange EXHF = 0.00000000

-V(xc)+E(xc) XCENC = 1690.14211936

PAW double counting = 13652.10586829 -13700.47723969

entropy T\*S EENTRO = -0.03758039

eigenvalues EBANDS = -8009.94108680

atomic energy EATOM = 18704.32991668

Solvation Ediel\_sol = 0.00000000

-----

free energy TOTEN = -1203.35627522 eV

energy without entropy = -1203.31869483 energy(sigma->0) = -1203.33748502

-----

----- Iteration 1( 10) -----

|           |          |         |           |        |
|-----------|----------|---------|-----------|--------|
| EDDIAG:   | cpu time | 1.9260: | real time | 1.9328 |
| RMM-DIIS: | cpu time | 7.9130: | real time | 7.9522 |
| ORTHCH:   | cpu time | 0.3591: | real time | 0.3604 |
| DOS:      | cpu time | 0.0004: | real time | 0.0004 |

-----

|       |          |          |           |         |
|-------|----------|----------|-----------|---------|
| LOOP: | cpu time | 10.1986: | real time | 10.2458 |
|-------|----------|----------|-----------|---------|

eigenvalue-minimisations : 2165

total energy-change (2. order) :-0.4509083E+00 (-0.4119970E+00)

|                    |             |               |             |
|--------------------|-------------|---------------|-------------|
| number of electron | 519.0000000 | magnetization | 147.0000000 |
|--------------------|-------------|---------------|-------------|

|                   |             |               |             |
|-------------------|-------------|---------------|-------------|
| augmentation part | 519.0000000 | magnetization | 147.0000000 |
|-------------------|-------------|---------------|-------------|

Free energy of the ion-electron system (eV)

---

alpha Z        PSCENC =        233.50077011

Ewald energy    TEWEN =        91329.23020906

-Hartree energ DENC =    -105102.20925185

-exchange       EXHF =            0.00000000

-V(xc)+E(xc)    XCENC =        1690.14211936

PAW double counting =    13652.10586829    -13700.47723969

entropy T\*S     EENTRO =        -0.03704897

eigenvalues     EBANDS =        -8010.39252652

atomic energy   EATOM =        18704.32991668

Solvation    Ediel\_sol =        0.00000000

---

free energy     TOTEN =        -1203.80718351 eV

energy without entropy =    -1203.77013454    energy(sigma->0) =    -1203.78865903

---

----- Iteration 1( 11) -----

EDDIAG: cpu time 1.9293: real time 1.9502  
RMM-DIIS: cpu time 7.3453: real time 7.3948  
ORTHCH: cpu time 0.3568: real time 0.3580  
DOS: cpu time 0.0004: real time 0.0004

-----

LOOP: cpu time 9.6319: real time 9.7034

eigenvalue-minimisations : 2045

total energy-change (2. order) :-0.2265513E-01 (-0.1945174E-01)

number of electron 519.0000000 magnetization 147.0000000

augmentation part 519.0000000 magnetization 147.0000000

Free energy of the ion-electron system (eV)

-----

alpha Z PSCENC = 233.50077011

Ewald energy TEWEN = 91329.23020906

-Hartree energ DENC = -105102.20925185

-exchange EXHF = 0.00000000  
-V(xc)+E(xc) XCENC = 1690.14211936  
PAW double counting = 13652.10586829 -13700.47723969  
entropy T\*S EENTRO = -0.03702975  
eigenvalues EBANDS = -8010.41520087  
atomic energy EATOM = 18704.32991668  
Solvation Ediel\_sol = 0.00000000

-----  
free energy TOTEN = -1203.82983864 eV

energy without entropy = -1203.79280890 energy(sigma->0) = -1203.81132377

----- Iteration 1( 12) -----

EDDIAG: cpu time 1.9226: real time 1.9288

RMM-DIIS:  cpu time    7.8274: real time    7.8657

  ORTHCH:  cpu time    0.3577: real time    0.3586

    DOS:  cpu time    0.0005: real time    0.0005

  CHARGE:  cpu time    0.5302: real time    0.5324

  MIXING:  cpu time    0.0067: real time    0.0075

-----

  LOOP:  cpu time   10.6450: real time   10.6935

eigenvalue-minimisations : 2073

total energy-change (2. order) :-0.4065193E-02  (-0.3871173E-02)

number of electron       518.9999725 magnetization       129.4925519

augmentation part       13.3485603 magnetization       120.1905281

Broyden mixing:

rms(total) = 0.76030E+01    rms(broyden)= 0.76014E+01

rms(prec ) = 0.78880E+01

weight for this iteration    100.00

Free energy of the ion-electron system (eV)

-----

alpha Z           PSCENC =       233.50077011

Ewald energy    TEWEN =       91329.23020906

-Hartree energ DENC = -105102.20925185

-exchange EXHF = 0.00000000

-V(xc)+E(xc) XCENC = 1690.14211936

PAW double counting = 13652.10586829 -13700.47723969

entropy T\*S EENTRO = -0.03702917

eigenvalues EBANDS = -8010.41926665

atomic energy EATOM = 18704.32991668

Solvation Ediel\_sol = 0.00000000

-----  
free energy TOTEN = -1203.83390384 eV

energy without entropy = -1203.79687467 energy(sigma->0) = -1203.81538925

----- Iteration 1( 13) -----

|           |          |          |           |         |
|-----------|----------|----------|-----------|---------|
| POTLOK:   | cpu time | 0.1799:  | real time | 0.1847  |
| SETDIJ:   | cpu time | 0.0101:  | real time | 0.0101  |
| EDDIAG:   | cpu time | 1.9260:  | real time | 1.9327  |
| RMM-DIIS: | cpu time | 7.1897:  | real time | 7.2188  |
| ORTHCH:   | cpu time | 0.3574:  | real time | 0.3584  |
| DOS:      | cpu time | 0.0005:  | real time | 0.0005  |
| CHARGE:   | cpu time | 0.5246:  | real time | 0.5263  |
| MIXING:   | cpu time | 0.0053:  | real time | 0.0058  |
| -----     |          |          |           |         |
| LOOP:     | cpu time | 10.1935: | real time | 10.2372 |

eigenvalue-minimisations : 1920

total energy-change (2. order) : 0.4159608E+03 (-0.6208793E+02)

number of electron      518.9999729 magnetization      110.9003208

augmentation part      12.9165444 magnetization      99.8831001

Broyden mixing:

rms(total) = 0.43964E+01      rms(broyden)= 0.43959E+01

rms(prec ) = 0.45875E+01

weight for this iteration      100.00

eigenvalues of (default mixing \* dielectric matrix)

average eigenvalue GAMMA= 0.9878

0.9878

Free energy of the ion-electron system (eV)

-----

alpha Z PSCENC = 233.50077011

Ewald energy TEWEN = 91329.23020906

-Hartree energy DENC = -105996.24158199

-exchange EXHF = 0.00000000

-V(xc)+E(xc) XCENC = 1997.14669930

PAW double counting = 25040.66430253 -25099.41948414

entropy T\*S EENTRO = -0.00001326

eigenvalues EBANDS = -6997.08394179

atomic energy EATOM = 18704.32991668

Solvation Ediel\_sol = 0.00000000

-----

free energy TOTEN = -787.87312349 eV

energy without entropy = -787.87311023 energy(sigma->0) = -787.87311686

-----

----- Iteration 1( 14) -----

POTLOK: cpu time 0.1779: real time 0.2063  
SETDIJ: cpu time 0.0101: real time 0.0101  
EDDIAG: cpu time 1.9259: real time 1.9326  
RMM-DIIS: cpu time 7.1390: real time 7.1728  
ORTHCH: cpu time 0.3551: real time 0.3563  
DOS: cpu time 0.0004: real time 0.0004  
CHARGE: cpu time 0.5233: real time 0.5249  
MIXING: cpu time 0.0049: real time 0.0050

-----

LOOP: cpu time 10.1365: real time 10.2083

eigenvalue-minimisations : 1920

total energy-change (2. order) :-0.8155024E+02 (-0.9086178E+01)

number of electron 518.9999735 magnetization 87.6529986

augmentation part 12.5034714 magnetization 76.5462227

Broyden mixing:

rms(total) = 0.28857E+01      rms(broyden)= 0.28854E+01

rms(prec ) = 0.29462E+01

weight for this iteration      100.00

eigenvalues of (default mixing \* dielectric matrix)

average eigenvalue GAMMA=    1.2636

0.8149   1.7123

Free energy of the ion-electron system (eV)

-----

alpha Z          PSCENC =          233.50077011

Ewald energy    TEWEN   =          91329.23020906

-Hartree energy DENC   =   -106759.76097741

-exchange       EXHF     =          0.00000000

-V(xc)+E(xc)    XCENC   =          1942.34566782

PAW double counting   =   36802.90568802   -36867.59288628

entropy T\*S     EENTRO =          -0.00713977

eigenvalues     EBANDS =          -6254.37460702

atomic energy   EATOM   =          18704.32991668

Solvation    Ediel\_sol   =          0.00000000

-----  
free energy    TOTEN    =    -869.42335878 eV

energy without entropy =    -869.41621901    energy(sigma->0) =    -869.41978889

----- Iteration    1( 15) -----

|           |          |         |           |        |
|-----------|----------|---------|-----------|--------|
| POTLOK:   | cpu time | 0.1732: | real time | 0.1890 |
| SETDIJ:   | cpu time | 0.0100: | real time | 0.0101 |
| EDDIAG:   | cpu time | 1.9259: | real time | 1.9324 |
| RMM-DIIS: | cpu time | 7.1674: | real time | 7.1933 |
| ORTHCH:   | cpu time | 0.3566: | real time | 0.3579 |
| DOS:      | cpu time | 0.0005: | real time | 0.0005 |
| CHARGE:   | cpu time | 0.5244: | real time | 0.5261 |
| MIXING:   | cpu time | 0.0051: | real time | 0.0051 |

-----  
LOOP:  cpu time   10.1631: real time   10.2143

eigenvalue-minimisations   :   1922

total energy-change (2. order) :-0.6584722E+02  (-0.5512357E+01)

number of electron       518.9999735 magnetization       71.4685680

augmentation part       12.1425180 magnetization       62.3404050

Broyden mixing:

rms(total) = 0.18281E+01    rms(broyden)= 0.18278E+01

rms(prec ) = 0.18431E+01

weight for this iteration    100.00

eigenvalues of (default mixing \* dielectric matrix)

average eigenvalue GAMMA=   1.3535

2.3106  1.0266  0.7233

Free energy of the ion-electron system (eV)

-----  
alpha Z       PSCENC =       233.50077011

Ewald energy   TEWEN  =       91329.23020906

-Hartree energ DENC  =   -107375.79845493

-exchange EXHF = 0.00000000  
-V(xc)+E(xc) XCENC = 1918.66466433  
PAW double counting = 49747.95946590 -49815.27733295  
entropy T\*S EENTRO = -0.01841236  
eigenvalues EBANDS = -5677.86140301  
atomic energy EATOM = 18704.32991668  
Solvation Ediel\_sol = 0.00000000

-----  
free energy TOTEN = -935.27057716 eV

energy without entropy = -935.25216480 energy(sigma->0) = -935.26137098

----- Iteration 1( 16) -----

POTLOK: cpu time 0.1729: real time 0.1927

|           |          |          |           |         |
|-----------|----------|----------|-----------|---------|
| SETDIJ:   | cpu time | 0.0101:  | real time | 0.0101  |
| EDDIAG:   | cpu time | 1.9261:  | real time | 1.9319  |
| RMM-DIIS: | cpu time | 7.1714:  | real time | 7.2039  |
| ORTHCH:   | cpu time | 0.3562:  | real time | 0.3571  |
| DOS:      | cpu time | 0.0005:  | real time | 0.0005  |
| CHARGE:   | cpu time | 0.5248:  | real time | 0.5264  |
| MIXING:   | cpu time | 0.0053:  | real time | 0.0053  |
| -----     |          |          |           |         |
| LOOP:     | cpu time | 10.1673: | real time | 10.2280 |

eigenvalue-minimisations : 1923

total energy-change (2. order) :-0.6752407E+02 (-0.2639404E+01)

number of electron 518.9999734 magnetization 51.8208336

augmentation part 11.9931659 magnetization 44.5183975

Broyden mixing:

rms(total) = 0.13854E+01 rms(broyden)= 0.13853E+01

rms(prec ) = 0.14006E+01

weight for this iteration 100.00

eigenvalues of (default mixing \* dielectric matrix)

average eigenvalue GAMMA= 1.4439

2.6103 1.6367 0.8599 0.6689

Free energy of the ion-electron system (eV)

-----  
alpha Z PSCENC = 233.50077011

Ewald energy TEWEN = 91329.23020906

-Hartree energy DENC = -107519.78222990

-exchange EXHF = 0.00000000

-V(xc)+E(xc) XCENC = 1880.60304409

PAW double counting = 54098.40596706 -54164.54467756

entropy T\*S EENTRO = -0.01740013

eigenvalues EBANDS = -5564.52024710

atomic energy EATOM = 18704.32991668

Solvation Ediel\_sol = 0.00000000

-----  
free energy TOTEN = -1002.79464769 eV

energy without entropy = -1002.77724756 energy(sigma->0) = -1002.78594763

-----

----- Iteration 1( 17) -----

POTLOK: cpu time 0.1737: real time 0.1948  
SETDIJ: cpu time 0.0101: real time 0.0101  
EDDIAG: cpu time 1.9252: real time 1.9314  
RMM-DIIS: cpu time 7.1286: real time 7.1811  
ORTHCH: cpu time 0.3566: real time 0.3575  
DOS: cpu time 0.0005: real time 0.0004  
CHARGE: cpu time 0.5250: real time 0.5266  
MIXING: cpu time 0.0058: real time 0.0058

-----

LOOP: cpu time 10.1255: real time 10.2078

eigenvalue-minimisations : 1920

total energy-change (2. order) :-0.7927338E+02 (-0.4749844E+01)

number of electron 518.9999732 magnetization 33.6768259

augmentation part 11.9369816 magnetization 30.2790873

Broyden mixing:

rms(total) = 0.99265E+00    rms(broyden)= 0.99242E+00

rms(prec ) = 0.10004E+01

weight for this iteration    100.00

eigenvalues of (default mixing \* dielectric matrix)

average eigenvalue GAMMA=    1.5377

3.1359   2.1034   1.0021   0.8184   0.6289

Free energy of the ion-electron system (eV)

-----

alpha Z        PSCENC =        233.50077011

Ewald energy    TEWEN   =        91329.23020906

-Hartree energ DENC    =    -107538.74966943

-exchange        EXHF    =        0.00000000

-V(xc)+E(xc)    XCENC   =        1831.77837520

PAW double counting    =    55680.40329255    -55744.06650899

entropy T\*S     EENTRO =        -0.00353678

eigenvalues     EBANDS =        -5578.49087816

atomic energy    EATOM   =        18704.32991668

Solvation    Ediel\_sol   =        0.00000000

-----

free energy TOTEN = -1082.06802976 eV

energy without entropy = -1082.06449297 energy(sigma->0) = -1082.06626137

-----

----- Iteration 1( 18) -----

|           |          |         |           |        |
|-----------|----------|---------|-----------|--------|
| POTLOK:   | cpu time | 0.1747: | real time | 0.1822 |
| SETDIJ:   | cpu time | 0.0100: | real time | 0.0101 |
| EDDIAG:   | cpu time | 1.9247: | real time | 1.9309 |
| RMM-DIIS: | cpu time | 7.1674: | real time | 7.1945 |
| ORTHCH:   | cpu time | 0.3562: | real time | 0.3571 |
| DOS:      | cpu time | 0.0004: | real time | 0.0004 |
| CHARGE:   | cpu time | 0.5249: | real time | 0.5263 |
| MIXING:   | cpu time | 0.0058: | real time | 0.0059 |

-----

LOOP:  cpu time   10.1641: real time   10.2074

eigenvalue-minimisations   :   1920

total energy-change (2. order) :-0.5386056E+02  (-0.3727611E+01)

number of electron       518.9999729 magnetization       24.2607392

augmentation part       11.8634838 magnetization       22.9160359

Broyden mixing:

rms(total) = 0.72623E+00    rms(broyden)= 0.72582E+00

rms(prec ) = 0.73345E+00

weight for this iteration    100.00

eigenvalues of (default mixing \* dielectric matrix)

average eigenvalue GAMMA=   1.4669

3.4038  2.2348  0.9543  0.9543  0.6271  0.6271

Free energy of the ion-electron system (eV)

-----

alpha Z       PSCENC =       233.50077011

Ewald energy   TEWEN  =       91329.23020906

-Hartree energ DENC   =   -107544.34898339

-exchange       EXHF   =       0.00000000

-V(xc)+E(xc) XCENC = 1797.98122008

PAW double counting = 55525.04609610 -55587.60449989

entropy T\*S EENTRO = -0.00455933

eigenvalues EBANDS = -5594.05876335

atomic energy EATOM = 18704.32991668

Solvation Ediel\_sol = 0.00000000

-----

free energy TOTEN = -1135.92859392 eV

energy without entropy = -1135.92403459 energy(sigma->0) = -1135.92631425

-----

----- Iteration 1( 19) -----

POTLOK: cpu time 0.1729: real time 0.1845

SETDIJ: cpu time 0.0100: real time 0.0100

|           |          |          |           |         |
|-----------|----------|----------|-----------|---------|
| EDDIAG:   | cpu time | 1.9273:  | real time | 1.9339  |
| RMM-DIIS: | cpu time | 7.1723:  | real time | 7.2035  |
| ORTHCH:   | cpu time | 0.3560:  | real time | 0.3571  |
| DOS:      | cpu time | 0.0004:  | real time | 0.0004  |
| CHARGE:   | cpu time | 0.5253:  | real time | 0.5269  |
| MIXING:   | cpu time | 0.0061:  | real time | 0.0062  |
| -----     |          |          |           |         |
| LOOP:     | cpu time | 10.1703: | real time | 10.2225 |

eigenvalue-minimisations : 1922

total energy-change (2. order) :-0.2906592E+02 (-0.2047657E+01)

number of electron      518.9999725 magnetization      11.8752298

augmentation part      11.8049912 magnetization      10.7127338

Broyden mixing:

rms(total) = 0.48193E+00      rms(broyden)= 0.48170E+00

rms(prec ) = 0.49062E+00

weight for this iteration      100.00

eigenvalues of (default mixing \* dielectric matrix)

average eigenvalue GAMMA=      1.7204

4.7702   2.5061   1.5519   1.1382   0.7227   0.7227   0.6311

Free energy of the ion-electron system (eV)

---

alpha Z        PSCENC =        233.50077011

Ewald energy    TEWEN =        91329.23020906

-Hartree energ DENC =    -107528.38618568

-exchange       EXHF =            0.00000000

-V(xc)+E(xc)    XCENC =        1778.38824580

PAW double counting =    54392.98229790    -54455.52857482

entropy T\*S     EENTRO =        -0.00000000

eigenvalues     EBANDS =        -5619.51119457

atomic energy   EATOM =        18704.32991668

Solvation    Ediel\_sol =        0.00000000

---

free energy     TOTEN =        -1164.99451552 eV

energy without entropy =    -1164.99451552    energy(sigma->0) =    -1164.99451552

---

----- Iteration 1( 20) -----

|           |          |         |           |        |
|-----------|----------|---------|-----------|--------|
| POTLOK:   | cpu time | 0.1717: | real time | 0.1924 |
| SETDIJ:   | cpu time | 0.0101: | real time | 0.0102 |
| EDDIAG:   | cpu time | 1.9241: | real time | 1.9304 |
| RMM-DIIS: | cpu time | 7.1662: | real time | 7.2026 |
| ORTHCH:   | cpu time | 0.3540: | real time | 0.3550 |
| DOS:      | cpu time | 0.0003: | real time | 0.0003 |
| CHARGE:   | cpu time | 0.5243: | real time | 0.5260 |
| MIXING:   | cpu time | 0.0065: | real time | 0.0064 |

-----

|       |          |          |           |         |
|-------|----------|----------|-----------|---------|
| LOOP: | cpu time | 10.1571: | real time | 10.2232 |
|-------|----------|----------|-----------|---------|

eigenvalue-minimisations : 1920

total energy-change (2. order) :-0.2247908E+02 (-0.2441003E+01)

|                    |             |               |           |
|--------------------|-------------|---------------|-----------|
| number of electron | 518.9999724 | magnetization | 7.3620543 |
|--------------------|-------------|---------------|-----------|

|                   |            |               |           |
|-------------------|------------|---------------|-----------|
| augmentation part | 11.7617118 | magnetization | 6.3297128 |
|-------------------|------------|---------------|-----------|

Broyden mixing:

rms(total) = 0.24810E+00      rms(broyden)= 0.24782E+00

rms(prec ) = 0.25716E+00

weight for this iteration      100.00

eigenvalues of (default mixing \* dielectric matrix)

average eigenvalue GAMMA=    1.7966

5.8972   2.2502   2.1394   0.9155   0.9155   0.8831   0.7487   0.6235

Free energy of the ion-electron system (eV)

-----

alpha Z          PSCENC =          233.50077011

Ewald energy    TEWEN =          91329.23020906

-Hartree energ DENC =   -107480.16632979

-exchange       EXHF =            0.00000000

-V(xc)+E(xc)    XCENC =          1761.34690267

PAW double counting =    52534.71371033   -52597.36891073

entropy T\*S     EENTRO =          -0.00000000

eigenvalues     EBANDS =          -5673.05986003

atomic energy   EATOM =          18704.32991668

Solvation    Ediel\_sol =          0.00000000

-----

free energy      TOTEN =          -1187.47359170 eV

energy without entropy = -1187.47359170 energy(sigma->0) = -1187.47359170

-----

----- Iteration 1( 21) -----

|           |          |         |           |        |
|-----------|----------|---------|-----------|--------|
| POTLOK:   | cpu time | 0.1683: | real time | 0.1688 |
| SETDIJ:   | cpu time | 0.0100: | real time | 0.0101 |
| EDDIAG:   | cpu time | 1.9287: | real time | 1.9349 |
| RMM-DIIS: | cpu time | 7.1825: | real time | 7.2175 |
| ORTHCH:   | cpu time | 0.3539: | real time | 0.3548 |
| DOS:      | cpu time | 0.0004: | real time | 0.0004 |
| CHARGE:   | cpu time | 0.5246: | real time | 0.5264 |
| MIXING:   | cpu time | 0.0068: | real time | 0.0069 |

-----

|       |          |          |           |         |
|-------|----------|----------|-----------|---------|
| LOOP: | cpu time | 10.1752: | real time | 10.2197 |
|-------|----------|----------|-----------|---------|

eigenvalue-minimisations : 1921

total energy-change (2. order) :-0.6015771E+01 (-0.2269652E+00)

number of electron 518.9999723 magnetization 4.8820893

augmentation part 11.7372508 magnetization 3.8981551

Broyden mixing:

rms(total) = 0.14986E+00 rms(broyden)= 0.14979E+00

rms(prec) = 0.15937E+00

weight for this iteration 100.00

eigenvalues of (default mixing \* dielectric matrix)

average eigenvalue GAMMA= 1.8615

6.7881 2.3938 2.3938 1.1785 0.9699 0.9699 0.7376 0.6938 0.6286

Free energy of the ion-electron system (eV)

-----

alpha Z PSCENC = 233.50077011

Ewald energy TEWEN = 91329.23020906

-Hartree energ DENC = -107460.83206167

-exchange EXHF = 0.00000000

-V(xc)+E(xc) XCENC = 1755.16201679

PAW double counting = 52318.82739995 -52381.67065872

entropy T\*S EENTRO = -0.00000000

eigenvalues EBANDS = -5692.03695447

atomic energy EATOM = 18704.32991668

Solvation Ediel\_sol = 0.00000000

-----

free energy TOTEN = -1193.48936226 eV

energy without entropy = -1193.48936226 energy(sigma->0) = -1193.48936226

-----

----- Iteration 1( 22) -----

POTLOK: cpu time 0.1701: real time 0.1859

SETDIJ: cpu time 0.0100: real time 0.0100

EDDIAG: cpu time 1.9344: real time 1.9414

RMM-DIIS:  cpu time    7.1579: real time    7.1975

  ORTHCH:  cpu time    0.3539: real time    0.3550

    DOS:  cpu time    0.0004: real time    0.0004

  CHARGE:  cpu time    0.5250: real time    0.5270

  MIXING:  cpu time    0.0071: real time    0.0071

-----

  LOOP:  cpu time   10.1588: real time   10.2242

eigenvalue-minimisations : 1920

total energy-change (2. order) :-0.3846462E+01 (-0.6217377E-01)

number of electron    518.9999724 magnetization    3.4287927

augmentation part    11.7352339 magnetization    2.4703433

Broyden mixing:

rms(total) = 0.86655E-01    rms(broyden)= 0.86615E-01

rms(prec ) = 0.93667E-01

weight for this iteration    100.00

eigenvalues of (default mixing \* dielectric matrix)

average eigenvalue GAMMA=    1.8605

7.1890  2.5393  2.5393  1.3960  1.0398  1.0398  0.7860  0.7860  0.6611  0.6285

Free energy of the ion-electron system (eV)

-----

alpha Z        PSCENC =        233.50077011

Ewald energy    TEWEN =        91329.23020906

-Hartree energy DENC =    -107425.07434742

-exchange       EXHF =            0.00000000

-V(xc)+E(xc)    XCENC =        1750.26433371

PAW double counting =    52050.88156602    -52113.79980481

entropy T\*S     EENTRO =        -0.00000000

eigenvalues     EBANDS =        -5726.66846737

atomic energy   EATOM =        18704.32991668

Solvation    Ediel\_sol =        0.00000000

-----

free energy     TOTEN =        -1197.33582402 eV

energy without entropy =    -1197.33582402    energy(sigma->0) =    -1197.33582402

-----

----- Iteration 1( 23) -----

|           |          |         |           |        |
|-----------|----------|---------|-----------|--------|
| POTLOK:   | cpu time | 0.1706: | real time | 0.1926 |
| SETDIJ:   | cpu time | 0.0101: | real time | 0.0101 |
| EDDIAG:   | cpu time | 1.9141: | real time | 1.9364 |
| RMM-DIIS: | cpu time | 7.1750: | real time | 7.2033 |
| ORTHCH:   | cpu time | 0.3556: | real time | 0.3566 |
| DOS:      | cpu time | 0.0004: | real time | 0.0004 |
| CHARGE:   | cpu time | 0.5233: | real time | 0.5249 |
| MIXING:   | cpu time | 0.0073: | real time | 0.0074 |

-----

|       |          |          |           |         |
|-------|----------|----------|-----------|---------|
| LOOP: | cpu time | 10.1564: | real time | 10.2317 |
|-------|----------|----------|-----------|---------|

eigenvalue-minimisations : 1921

total energy-change (2. order) :-0.2277417E+01 (-0.1649966E-01)

|                    |             |               |           |
|--------------------|-------------|---------------|-----------|
| number of electron | 518.9999724 | magnetization | 2.4821834 |
|--------------------|-------------|---------------|-----------|

|                   |            |               |           |
|-------------------|------------|---------------|-----------|
| augmentation part | 11.7363931 | magnetization | 1.5330397 |
|-------------------|------------|---------------|-----------|

Broyden mixing:

|                          |                           |
|--------------------------|---------------------------|
| rms(total) = 0.55902E-01 | rms(broyden)= 0.55891E-01 |
|--------------------------|---------------------------|

rms(prec ) = 0.60789E-01

weight for this iteration 100.00

eigenvalues of (default mixing \* dielectric matrix)

average eigenvalue GAMMA= 1.8666

7.3180 2.7694 2.7694 1.6976 1.2155 0.9865 0.9865 0.7529 0.7529 0.6269

0.6565

Free energy of the ion-electron system (eV)

-----

alpha Z PSCENC = 233.50077011

Ewald energy TEWEN = 91329.23020906

-Hartree energy DENC = -107396.52545828

-exchange EXHF = 0.00000000

-V(xc)+E(xc) XCENC = 1747.40461145

PAW double counting = 52022.76870542 -52085.69999667

entropy T\*S EENTRO = -0.00000000

eigenvalues EBANDS = -5754.62199861

atomic energy EATOM = 18704.32991668

Solvation Ediel\_sol = 0.00000000

-----

free energy TOTEN = -1199.61324084 eV

energy without entropy = -1199.61324084 energy(sigma->0) = -1199.61324084

-----

----- Iteration 1( 24) -----

|           |          |         |           |        |
|-----------|----------|---------|-----------|--------|
| POTLOK:   | cpu time | 0.1680: | real time | 0.1690 |
| SETDIJ:   | cpu time | 0.0100: | real time | 0.0100 |
| EDDIAG:   | cpu time | 1.9282: | real time | 1.9342 |
| RMM-DIIS: | cpu time | 7.1698: | real time | 7.1897 |
| ORTHCH:   | cpu time | 0.3548: | real time | 0.3558 |
| DOS:      | cpu time | 0.0004: | real time | 0.0004 |
| CHARGE:   | cpu time | 0.5230: | real time | 0.5246 |
| MIXING:   | cpu time | 0.0078: | real time | 0.0078 |

-----

|       |          |          |           |         |
|-------|----------|----------|-----------|---------|
| LOOP: | cpu time | 10.1619: | real time | 10.1916 |
|-------|----------|----------|-----------|---------|

eigenvalue-minimisations : 1920

total energy-change (2. order) :-0.1390432E+01 (-0.5353285E-02)

number of electron      518.9999724 magnetization      1.8161170

augmentation part      11.7363030 magnetization      0.8692455

Broyden mixing:

rms(total) = 0.34897E-01      rms(broyden)= 0.34892E-01

rms(prec ) = 0.37950E-01

weight for this iteration      100.00

eigenvalues of (default mixing \* dielectric matrix)

average eigenvalue GAMMA=      1.8827

7.4267   3.5450   2.6389   2.0268   1.2480   1.0550   1.0550   0.8399   0.7469   0.7469

0.6215   0.6422

Free energy of the ion-electron system (eV)

-----

alpha Z      PSCENC =      233.50077011

Ewald energy      TEWEN =      91329.23020906

-Hartree energ DENC      =      -107375.59696301

-exchange      EXHF =      0.00000000

-V(xc)+E(xc) XCENC = 1745.79516896

PAW double counting = 52128.74863518 -52191.68100635

entropy T\*S EENTRO = -0.00000000

eigenvalues EBANDS = -5775.33040336

atomic energy EATOM = 18704.32991668

Solvation Ediel\_sol = 0.00000000

-----

free energy TOTEN = -1201.00367271 eV

energy without entropy = -1201.00367271 energy(sigma->0) = -1201.00367271

-----

----- Iteration 1( 25) -----

POTLOK: cpu time 0.1679: real time 0.1689

SETDIJ: cpu time 0.0100: real time 0.0100

|           |          |          |           |         |
|-----------|----------|----------|-----------|---------|
| EDDIAG:   | cpu time | 1.9250:  | real time | 1.9312  |
| RMM-DIIS: | cpu time | 7.1800:  | real time | 7.2036  |
| ORTHCH:   | cpu time | 0.3545:  | real time | 0.3554  |
| DOS:      | cpu time | 0.0004:  | real time | 0.0004  |
| CHARGE:   | cpu time | 0.5222:  | real time | 0.5241  |
| MIXING:   | cpu time | 0.0079:  | real time | 0.0079  |
| -----     |          |          |           |         |
| LOOP:     | cpu time | 10.1679: | real time | 10.2015 |

eigenvalue-minimisations : 1920

total energy-change (2. order) :-0.9019985E+00 (-0.2798415E-02)

number of electron      518.9999724 magnetization      1.3869764

augmentation part      11.7364323 magnetization      0.4407608

Broyden mixing:

rms(total) = 0.21413E-01      rms(broyden)= 0.21407E-01

rms(prec ) = 0.23398E-01

weight for this iteration      100.00

eigenvalues of (default mixing \* dielectric matrix)

average eigenvalue GAMMA=      1.9142

7.5661 4.2054 2.5435 2.3925 1.5228 1.1787 1.0030 1.0030 0.7640 0.7640

0.6941 0.6341 0.6135

Free energy of the ion-electron system (eV)

-----

alpha Z PSCENC = 233.50077011

Ewald energy TEWEN = 91329.23020906

-Hartree energy DENC = -107359.65007262

-exchange EXHF = 0.00000000

-V(xc)+E(xc) XCENC = 1744.73232841

PAW double counting = 52170.11401385 -52233.03392242

entropy T\*S EENTRO = -0.00000000

eigenvalues EBANDS = -5791.12891424

atomic energy EATOM = 18704.32991668

Solvation Ediel\_sol = 0.00000000

-----

free energy TOTEN = -1201.90567116 eV

energy without entropy = -1201.90567116 energy(sigma->0) = -1201.90567116

-----

----- Iteration 1( 26) -----

|           |          |         |           |        |
|-----------|----------|---------|-----------|--------|
| POTLOK:   | cpu time | 0.1692: | real time | 0.1968 |
| SETDIJ:   | cpu time | 0.0100: | real time | 0.0101 |
| EDDIAG:   | cpu time | 1.9249: | real time | 1.9313 |
| RMM-DIIS: | cpu time | 7.2046: | real time | 7.2307 |
| ORTHCH:   | cpu time | 0.3540: | real time | 0.3553 |
| DOS:      | cpu time | 0.0004: | real time | 0.0004 |
| CHARGE:   | cpu time | 0.5225: | real time | 0.5242 |
| MIXING:   | cpu time | 0.0084: | real time | 0.0084 |

-----

|       |          |          |           |         |
|-------|----------|----------|-----------|---------|
| LOOP: | cpu time | 10.1940: | real time | 10.2572 |
|-------|----------|----------|-----------|---------|

eigenvalue-minimisations : 1923

total energy-change (2. order) :-0.5321665E+00 (-0.9657343E-03)

|                    |             |               |           |
|--------------------|-------------|---------------|-----------|
| number of electron | 518.9999723 | magnetization | 1.1620054 |
|--------------------|-------------|---------------|-----------|

|                   |            |               |           |
|-------------------|------------|---------------|-----------|
| augmentation part | 11.7367917 | magnetization | 0.2160075 |
|-------------------|------------|---------------|-----------|

Broyden mixing:

rms(total) = 0.11666E-01      rms(broyden)= 0.11660E-01

rms(prec ) = 0.13045E-01

weight for this iteration      100.00

eigenvalues of (default mixing \* dielectric matrix)

average eigenvalue GAMMA=    1.9608

7.7154  4.9104  2.6645  2.6645  1.8366  1.1393  1.1393  0.9758  0.9758  0.7580

0.7580  0.6747  0.6293  0.6101

Free energy of the ion-electron system (eV)

-----

alpha Z            PSCENC =            233.50077011

Ewald energy      TEWEN    =            91329.23020906

-Hartree energy DENC    =       -107349.79634083

-exchange          EXHF      =            0.00000000

-V(xc)+E(xc)      XCENC    =            1744.13353760

PAW double counting    =       52180.32743183    -52243.23662334

entropy T\*S       EENTRO =            -0.00000000

eigenvalues       EBANDS =            -5800.92673876

atomic energy      EATOM    =            18704.32991668

Solvation    Ediel\_sol    =            0.00000000

-----  
free energy    TOTEN    =    -1202.43783764 eV

energy without entropy =    -1202.43783764    energy(sigma->0) =    -1202.43783764

----- Iteration    1( 27) -----

|           |          |         |           |        |
|-----------|----------|---------|-----------|--------|
| POTLOK:   | cpu time | 0.1688: | real time | 0.1723 |
| SETDIJ:   | cpu time | 0.0102: | real time | 0.0102 |
| EDDIAG:   | cpu time | 1.9256: | real time | 1.9326 |
| RMM-DIIS: | cpu time | 7.1935: | real time | 7.2203 |
| ORTHCH:   | cpu time | 0.3539: | real time | 0.3551 |
| DOS:      | cpu time | 0.0004: | real time | 0.0004 |
| CHARGE:   | cpu time | 0.5244: | real time | 0.5262 |
| MIXING:   | cpu time | 0.0090: | real time | 0.0090 |

-----  
LOOP:  cpu time   10.1858: real time   10.2261

eigenvalue-minimisations   :   1921

total energy-change (2. order) :-0.2161649E+00   (-0.4016869E-03)

number of electron       518.9999723 magnetization       1.0647759

augmentation part       11.7367477 magnetization       0.1188298

Broyden mixing:

rms(total) = 0.61180E-02       rms(broyden)= 0.61135E-02

rms(prec ) = 0.70995E-02

weight for this iteration       100.00

eigenvalues of (default mixing \* dielectric matrix)

average eigenvalue GAMMA=   1.9711

7.8207  5.4101  2.7776  2.7776  1.9908  1.3769  1.1214  1.0118  1.0118  0.8593

0.7485  0.7485  0.6753  0.6260  0.6100

Free energy of the ion-electron system (eV)

-----  
alpha Z       PSCENC =       233.50077011

Ewald energy   TEWEN  =       91329.23020906

-Hartree energ DENC = -107344.69589719

-exchange EXHF = 0.00000000

-V(xc)+E(xc) XCENC = 1743.93646677

PAW double counting = 52187.79399261 -52250.70504239

entropy T\*S EENTRO = -0.00000000

eigenvalues EBANDS = -5806.04441824

atomic energy EATOM = 18704.32991668

Solvation Ediel\_sol = 0.00000000

-----  
free energy TOTEN = -1202.65400258 eV

energy without entropy = -1202.65400258 energy(sigma->0) = -1202.65400258

----- Iteration 1( 28) -----

|           |          |          |           |         |
|-----------|----------|----------|-----------|---------|
| POTLOK:   | cpu time | 0.1775:  | real time | 0.1830  |
| SETDIJ:   | cpu time | 0.0100:  | real time | 0.0100  |
| EDDIAG:   | cpu time | 1.9276:  | real time | 1.9336  |
| RMM-DIIS: | cpu time | 7.1730:  | real time | 7.2115  |
| ORTHCH:   | cpu time | 0.3560:  | real time | 0.3572  |
| DOS:      | cpu time | 0.0003:  | real time | 0.0003  |
| CHARGE:   | cpu time | 0.5219:  | real time | 0.5234  |
| MIXING:   | cpu time | 0.0096:  | real time | 0.0097  |
| -----     |          |          |           |         |
| LOOP:     | cpu time | 10.1759: | real time | 10.2287 |

eigenvalue-minimisations : 1923

total energy-change (2. order) :-0.7630373E-01 (-0.1212697E-03)

number of electron 518.9999723 magnetization 1.0187580

augmentation part 11.7367652 magnetization 0.0729141

Broyden mixing:

rms(total) = 0.32173E-02 rms(broyden)= 0.32153E-02

rms(prec ) = 0.40464E-02

weight for this iteration 100.00

eigenvalues of (default mixing \* dielectric matrix)

average eigenvalue GAMMA= 1.9912

7.9282 5.8052 3.0557 2.7471 2.2371 1.6836 1.1838 1.1027 0.9836 0.9836

0.7689 0.7689 0.6973 0.6796 0.6228 0.6111

Free energy of the ion-electron system (eV)

-----

alpha Z PSCENC = 233.50077011

Ewald energy TEWEN = 91329.23020906

-Hartree energy DENC = -107341.79559049

-exchange EXHF = 0.00000000

-V(xc)+E(xc) XCENC = 1743.86152718

PAW double counting = 52181.15784311 -52244.07419286

entropy T\*S EENTRO = -0.00000000

eigenvalues EBANDS = -5808.94078911

atomic energy EATOM = 18704.32991668

Solvation Ediel\_sol = 0.00000000

-----

free energy TOTEN = -1202.73030631 eV

energy without entropy = -1202.73030631 energy(sigma->0) = -1202.73030631

-----

----- Iteration 1( 29) -----

|           |          |         |           |        |
|-----------|----------|---------|-----------|--------|
| POTLOK:   | cpu time | 0.1733: | real time | 0.1964 |
| SETDIJ:   | cpu time | 0.0101: | real time | 0.0101 |
| EDDIAG:   | cpu time | 1.9250: | real time | 1.9341 |
| RMM-DIIS: | cpu time | 7.2538: | real time | 7.2856 |
| ORTHCH:   | cpu time | 0.3545: | real time | 0.3557 |
| DOS:      | cpu time | 0.0004: | real time | 0.0004 |
| CHARGE:   | cpu time | 0.5229: | real time | 0.5247 |
| MIXING:   | cpu time | 0.0104: | real time | 0.0104 |

-----

|       |          |          |           |         |
|-------|----------|----------|-----------|---------|
| LOOP: | cpu time | 10.2504: | real time | 10.3175 |
|-------|----------|----------|-----------|---------|

eigenvalue-minimisations : 1931

total energy-change (2. order) :-0.3135074E-01 (-0.4043497E-04)

number of electron 518.9999723 magnetization 1.0074543

augmentation part            11.7368788 magnetization            0.0616848

Broyden mixing:

rms(total) = 0.15439E-02      rms(broyden)= 0.15429E-02

rms(prec ) = 0.22919E-02

weight for this iteration      100.00

eigenvalues of (default mixing \* dielectric matrix)

average eigenvalue GAMMA=    1.9913

7.9769  6.0692  3.3946  2.5652  2.5652  1.7938  1.3458  1.0473  1.0473  0.9776

0.9776  0.7592  0.7592  0.6693  0.6693  0.6229  0.6114

Free energy of the ion-electron system (eV)

-----

alpha Z            PSCENC =            233.50077011

Ewald energy      TEWEN =            91329.23020906

-Hartree energ DENC =    -107339.91903463

-exchange          EXHF =            0.00000000

-V(xc)+E(xc)      XCENC =            1743.82392225

PAW double counting =    52176.27049065    -52239.18831157

entropy T\*S        EENTRO =            -0.00000000

eigenvalues        EBANDS =            -5810.80961959

atomic energy EATOM = 18704.32991668

Solvation Ediel\_sol = 0.00000000

-----  
free energy TOTEN = -1202.76165705 eV

energy without entropy = -1202.76165705 energy(sigma->0) = -1202.76165705

----- Iteration 1( 30) -----

|           |          |         |           |        |
|-----------|----------|---------|-----------|--------|
| POTLOK:   | cpu time | 0.1682: | real time | 0.1711 |
| SETDIJ:   | cpu time | 0.0129: | real time | 0.0129 |
| EDDIAG:   | cpu time | 1.9273: | real time | 1.9340 |
| RMM-DIIS: | cpu time | 7.2982: | real time | 7.3234 |
| ORTHCH:   | cpu time | 0.3547: | real time | 0.3560 |
| DOS:      | cpu time | 0.0003: | real time | 0.0003 |

CHARGE:  cpu time     0.5226: real time     0.5242

MIXING:  cpu time     0.0104: real time     0.0104

-----

LOOP:  cpu time     10.2946: real time     10.3322

eigenvalue-minimisations  :  1938

total energy-change (2. order) :-0.7418754E-02  (-0.1043906E-04)

number of electron       518.9999723 magnetization       1.0040893

augmentation part       11.7369592 magnetization       0.0583134

Broyden mixing:

rms(total) = 0.90440E-03     rms(broyden)= 0.90392E-03

rms(prec ) = 0.15000E-02

weight for this iteration     100.00

eigenvalues of (default mixing \* dielectric matrix)

average eigenvalue GAMMA=    1.9781

7.9866  6.2192  3.5364  2.6619  2.6619  1.8908  1.4758  1.2631  0.9992  0.9992

1.0021  0.8553  0.7512  0.7512  0.6562  0.6562  0.6125  0.6259

Free energy of the ion-electron system (eV)

-----

alpha Z PSCENC = 233.50077011  
Ewald energy TEWEN = 91329.23020906  
-Hartree energy DENC = -107338.79532071  
-exchange EXHF = 0.00000000  
-V(xc)+E(xc) XCENC = 1743.81379259  
PAW double counting = 52176.75708908 -52239.67510362  
entropy T\*S EENTRO = -0.00000000  
eigenvalues EBANDS = -5811.93042899  
atomic energy EATOM = 18704.32991668  
Solvation Ediel\_sol = 0.00000000

-----  
free energy TOTEN = -1202.76907580 eV

energy without entropy = -1202.76907580 energy(sigma->0) = -1202.76907580

|           |          |          |           |         |
|-----------|----------|----------|-----------|---------|
| POTLOK:   | cpu time | 0.1658:  | real time | 0.1668  |
| SETDIJ:   | cpu time | 0.0101:  | real time | 0.0101  |
| EDDIAG:   | cpu time | 1.9251:  | real time | 1.9320  |
| RMM-DIIS: | cpu time | 7.1953:  | real time | 7.2300  |
| ORTHCH:   | cpu time | 0.3541:  | real time | 0.3554  |
| DOS:      | cpu time | 0.0003:  | real time | 0.0003  |
| CHARGE:   | cpu time | 0.5213:  | real time | 0.5231  |
| MIXING:   | cpu time | 0.0107:  | real time | 0.0108  |
| -----     |          |          |           |         |
| LOOP:     | cpu time | 10.1827: | real time | 10.2284 |

eigenvalue-minimisations : 1926

total energy-change (2. order) :-0.9633148E-03 (-0.2475593E-05)

number of electron 518.9999723 magnetization 0.9996549

augmentation part 11.7370307 magnetization 0.0538903

Broyden mixing:

rms(total) = 0.60538E-03 rms(broyden)= 0.60505E-03

rms(prec ) = 0.10420E-02

weight for this iteration 100.00

eigenvalues of (default mixing \* dielectric matrix)

average eigenvalue GAMMA= 1.9635

7.9958 6.2692 3.6840 2.7397 2.7397 1.9735 1.7519 1.1702 1.1702 1.0406

0.9755 0.9755 0.7614 0.7614 0.7518 0.6697 0.6139 0.6313 0.6313

Free energy of the ion-electron system (eV)

-----  
alpha Z PSCENC = 233.50077011

Ewald energy TEWEN = 91329.23020906

-Hartree energ DENC = -107337.98021789

-exchange EXHF = 0.00000000

-V(xc)+E(xc) XCENC = 1743.80645195

PAW double counting = 52176.21282522 -52239.13122311

entropy T\*S EENTRO = -0.00000000

eigenvalues EBANDS = -5812.73877114

atomic energy EATOM = 18704.32991668

Solvation Ediel\_sol = 0.00000000

-----  
free energy TOTEN = -1202.77003911 eV

energy without entropy = -1202.77003911 energy(sigma->0) = -1202.77003911

-----

----- Iteration 1( 32) -----

|           |          |          |           |         |
|-----------|----------|----------|-----------|---------|
| POTLOK:   | cpu time | 0.1695:  | real time | 0.1977  |
| SETDIJ:   | cpu time | 0.0099:  | real time | 0.0099  |
| EDDIAG:   | cpu time | 1.9291:  | real time | 1.9354  |
| RMM-DIIS: | cpu time | 7.1756:  | real time | 7.1986  |
| ORTHCH:   | cpu time | 0.3561:  | real time | 0.3572  |
| DOS:      | cpu time | 0.0004:  | real time | 0.0004  |
| CHARGE:   | cpu time | 0.5215:  | real time | 0.5231  |
| MIXING:   | cpu time | 0.0115:  | real time | 0.0115  |
| -----     |          |          |           |         |
| LOOP:     | cpu time | 10.1738: | real time | 10.2338 |

total energy-change (2. order) :-0.3996028E-03 (-0.1591722E-05)

number of electron      518.9999723 magnetization      0.9989696

augmentation part      11.7370934 magnetization      0.0532232

Broyden mixing:

rms(total) = 0.41892E-03      rms(broyden)= 0.41858E-03

rms(prec ) = 0.66842E-03

weight for this iteration      100.00

eigenvalues of (default mixing \* dielectric matrix)

average eigenvalue GAMMA=      1.9756

7.9990   6.3261   4.0079   2.8835   2.8835   2.1514   1.9534   1.3239   1.3239   1.0293

1.0293   0.9220   0.9220   0.7562   0.7562   0.7065   0.6651   0.6145   0.6296   0.6296

Free energy of the ion-electron system (eV)

-----

alpha Z      PSCENC =      233.50077011

Ewald energy      TEWEN =      91329.23020906

-Hartree energ      DENC =      -107337.20981452

-exchange      EXHF =      0.00000000

-V(xc)+E(xc)      XCENC =      1743.80042579

PAW double counting =      52176.03241224      -52238.95094585

entropy T\*S    EENTRO =        -0.00000000

eigenvalues    EBANDS =        -5813.50341224

atomic energy  EATOM  =        18704.32991668

Solvation    Ediel\_sol  =        0.00000000

-----  
free energy    TOTEN  =        -1202.77043872 eV

energy without entropy =    -1202.77043872    energy(sigma->0) =    -1202.77043872

-----  
----- Iteration        1( 33) -----

POTLOK:    cpu time    0.1702: real time    0.1850

SETDIJ:    cpu time    0.0100: real time    0.0100

EDDIAG:    cpu time    1.9262: real time    1.9328

RMM-DIIS:    cpu time    7.0565: real time    7.0910

ORTHCH: cpu time 0.3560: real time 0.3569

DOS: cpu time 0.0004: real time 0.0004

CHARGE: cpu time 0.5239: real time 0.5255

MIXING: cpu time 0.0114: real time 0.0114

-----

LOOP: cpu time 10.0547: real time 10.1131

eigenvalue-minimisations : 1905

total energy-change (2. order) :-0.2601544E-03 (-0.8083856E-06)

number of electron 518.9999723 magnetization 0.9996984

augmentation part 11.7371163 magnetization 0.0539585

Broyden mixing:

rms(total) = 0.26943E-03 rms(broyden)= 0.26923E-03

rms(prec ) = 0.41380E-03

weight for this iteration 100.00

eigenvalues of (default mixing \* dielectric matrix)

average eigenvalue GAMMA= 1.9835

7.9946 6.3932 4.4348 3.0115 3.0115 2.3369 1.9837 1.5677 1.2099 1.2099

1.0037 1.0037 0.8799 0.8799 0.7528 0.7528 0.6956 0.6146 0.6549 0.6288

0.6329

Free energy of the ion-electron system (eV)

---

alpha Z        PSCENC =        233.50077011

Ewald energy    TEWEN =        91329.23020906

-Hartree energ DENC =    -107336.70114258

-exchange       EXHF =            0.00000000

-V(xc)+E(xc)    XCENC =        1743.79887902

PAW double counting =    52176.74389101    -52239.66244722

entropy T\*S     EENTRO =        -0.00000000

eigenvalues     EBANDS =        -5814.01077496

atomic energy   EATOM =        18704.32991668

Solvation    Ediel\_sol =        0.00000000

---

free energy     TOTEN =        -1202.77069887 eV

energy without entropy =    -1202.77069887    energy(sigma->0) =    -1202.77069887

---

----- Iteration 1( 34) -----

|           |          |         |           |        |
|-----------|----------|---------|-----------|--------|
| POTLOK:   | cpu time | 0.1688: | real time | 0.1708 |
| SETDIJ:   | cpu time | 0.0099: | real time | 0.0099 |
| EDDIAG:   | cpu time | 1.9256: | real time | 1.9325 |
| RMM-DIIS: | cpu time | 6.4971: | real time | 6.5284 |
| ORTHCH:   | cpu time | 0.3530: | real time | 0.3542 |
| DOS:      | cpu time | 0.0004: | real time | 0.0004 |
| CHARGE:   | cpu time | 0.4805: | real time | 0.5304 |
| MIXING:   | cpu time | 0.0111: | real time | 0.0112 |
| -----     |          |         |           |        |
| LOOP:     | cpu time | 9.4464: | real time | 9.5378 |

eigenvalue-minimisations : 1793

total energy-change (2. order) :-0.4183618E-03 (-0.4915493E-06)

number of electron 518.9999723 magnetization 0.9993478

augmentation part 11.7371271 magnetization 0.0536153

Broyden mixing:

rms(total) = 0.16952E-03      rms(broyden)= 0.16939E-03

rms(prec ) = 0.24860E-03

weight for this iteration      100.00

eigenvalues of (default mixing \* dielectric matrix)

average eigenvalue GAMMA=    2.0128

7.9986   6.4847   5.2064   3.3284   2.8447   2.5972   1.9942   1.8150   1.2970   1.2970

1.0356   1.0356   0.9261   0.9261   0.7586   0.7586   0.7573   0.7016   0.6153   0.6228

0.6406   0.6406

Free energy of the ion-electron system (eV)

-----

alpha Z          PSCENC =          233.50077011

Ewald energy    TEWEN =          91329.23020906

-Hartree energy DENC =    -107336.33783538

-exchange       EXHF =            0.00000000

-V(xc)+E(xc)    XCENC =          1743.79747825

PAW double counting =    52176.76241682   -52239.68108251

entropy T\*S     EENTRO =          -0.00000000

eigenvalues     EBANDS =         -5814.37299027

atomic energy   EATOM =          18704.32991668

Solvation    Ediel\_sol =          0.00000000

-----  
free energy    TOTEN    =    -1202.77111723 eV

energy without entropy =    -1202.77111723    energy(sigma->0) =    -1202.77111723

----- Iteration            1( 35) -----

|           |          |         |           |        |
|-----------|----------|---------|-----------|--------|
| POTLOK:   | cpu time | 0.1695: | real time | 0.1724 |
| SETDIJ:   | cpu time | 0.0099: | real time | 0.0099 |
| EDDIAG:   | cpu time | 1.9257: | real time | 1.9326 |
| RMM-DIIS: | cpu time | 6.3972: | real time | 6.4315 |
| ORTHCH:   | cpu time | 0.3547: | real time | 0.3559 |
| DOS:      | cpu time | 0.0004: | real time | 0.0004 |
| CHARGE:   | cpu time | 0.5244: | real time | 0.5261 |
| MIXING:   | cpu time | 0.0116: | real time | 0.0117 |

-----  
LOOP:  cpu time    9.3934: real time    9.4405

eigenvalue-minimisations : 1756

total energy-change (2. order) :-0.2705514E-03  (-0.3666622E-06)

number of electron    518.9999723 magnetization       0.9994705

augmentation part    11.7371366 magnetization       0.0537458

Broyden mixing:

rms(total) = 0.90969E-04    rms(broyden)= 0.90868E-04

rms(prec ) = 0.13439E-03

weight for this iteration    100.00

eigenvalues of (default mixing \* dielectric matrix)

average eigenvalue GAMMA=   2.0571

8.0056  6.9275  5.9855  3.5859  2.8690  2.7255  2.2461  1.8675  1.4614  1.1987

1.1987  1.0144  1.0144  0.8870  0.8870  0.7559  0.7559  0.7347  0.6805  0.6162

0.6226  0.6397  0.6333

Free energy of the ion-electron system (eV)

-----  
alpha Z           PSCENC =       233.50077011

Ewald energy TEWEN = 91329.23020906

-Hartree energy DENC = -107336.10106619

-exchange EXHF = 0.00000000

-V(xc)+E(xc) XCENC = 1743.79667318

PAW double counting = 52176.69265360 -52239.61139613

entropy T\*S EENTRO = -0.00000000

eigenvalues EBANDS = -5814.60914809

atomic energy EATOM = 18704.32991668

Solvation Ediel\_sol = 0.00000000

-----

free energy TOTEN = -1202.77138778 eV

energy without entropy = -1202.77138778 energy(sigma->0) = -1202.77138778

-----

|           |          |         |           |        |
|-----------|----------|---------|-----------|--------|
| POTLOK:   | cpu time | 0.1697: | real time | 0.1872 |
| SETDIJ:   | cpu time | 0.0100: | real time | 0.0101 |
| EDDIAG:   | cpu time | 1.9271: | real time | 1.9332 |
| RMM-DIIS: | cpu time | 6.0623: | real time | 6.0913 |
| ORTHCH:   | cpu time | 0.3540: | real time | 0.3551 |
| DOS:      | cpu time | 0.0004: | real time | 0.0004 |
| CHARGE:   | cpu time | 0.5236: | real time | 0.5252 |
| MIXING:   | cpu time | 0.0125: | real time | 0.0125 |
| -----     |          |         |           |        |
| LOOP:     | cpu time | 9.0595: | real time | 9.1150 |

eigenvalue-minimisations : 1673

total energy-change (2. order) :-0.6923552E-04 (-0.8366979E-07)

number of electron      518.9999723 magnetization      0.9997405

augmentation part      11.7371376 magnetization      0.0540153

Broyden mixing:

rms(total) = 0.50469E-04      rms(broyden)= 0.50424E-04

rms(prec ) = 0.77252E-04

weight for this iteration      100.00

eigenvalues of (default mixing \* dielectric matrix)

average eigenvalue GAMMA= 2.0667

7.9959 7.5413 6.1436 3.7490 2.9506 2.7200 2.3906 1.8042 1.6345 1.2397

1.2397 1.0287 1.0287 0.9243 0.9243 0.8744 0.7543 0.7543 0.7272 0.6614

0.6543 0.6167 0.6213 0.6213

Free energy of the ion-electron system (eV)

-----

alpha Z PSCENC = 233.50077011

Ewald energy TEWEN = 91329.23020906

-Hartree energ DENC = -107335.99953872

-exchange EXHF = 0.00000000

-V(xc)+E(xc) XCENC = 1743.79676887

PAW double counting = 52176.81208529 -52239.73088500

entropy T\*S EENTRO = -0.00000000

eigenvalues EBANDS = -5814.71078331

atomic energy EATOM = 18704.32991668

Solvation Ediel\_sol = 0.00000000

-----

free energy TOTEN = -1202.77145702 eV

energy without entropy = -1202.77145702 energy(sigma->0) = -1202.77145702

-----

----- Iteration 1( 37) -----

|           |          |         |           |        |
|-----------|----------|---------|-----------|--------|
| POTLOK:   | cpu time | 0.1742: | real time | 0.1810 |
| SETDIJ:   | cpu time | 0.0099: | real time | 0.0099 |
| EDDIAG:   | cpu time | 1.9262: | real time | 1.9325 |
| RMM-DIIS: | cpu time | 5.4986: | real time | 5.5204 |
| ORTHCH:   | cpu time | 0.3530: | real time | 0.3539 |
| DOS:      | cpu time | 0.0004: | real time | 0.0004 |
| CHARGE:   | cpu time | 0.5235: | real time | 0.5254 |
| MIXING:   | cpu time | 0.0124: | real time | 0.0125 |
| -----     |          |         |           |        |
| LOOP:     | cpu time | 8.4982: | real time | 8.5360 |

eigenvalue-minimisations : 1518

total energy-change (2. order) :-0.8873205E-05 (-0.2240760E-07)

number of electron 518.9999723 magnetization 0.9998117

augmentation part 11.7371385 magnetization 0.0540852

Broyden mixing:

rms(total) = 0.31392E-04 rms(broyden)= 0.31372E-04

rms(prec ) = 0.48504E-04

weight for this iteration 100.00

eigenvalues of (default mixing \* dielectric matrix)

average eigenvalue GAMMA= 2.0706

7.9829 7.9829 6.2014 3.8578 3.0420 2.7016 2.4969 1.8805 1.8805 1.2451

1.2451 1.2391 1.0212 1.0212 0.8968 0.8968 0.7611 0.7611 0.7714 0.7176

0.6523 0.6523 0.6182 0.6182 0.6204

Free energy of the ion-electron system (eV)

-----

alpha Z PSCENC = 233.50077011

Ewald energy TEWEN = 91329.23020906

-Hartree energ DENC = -107335.95155523

-exchange EXHF = 0.00000000

-V(xc)+E(xc) XCENC = 1743.79664123

PAW double counting = 52176.81515383 -52239.73397247

entropy T\*S EENTRO = -0.00000000

eigenvalues EBANDS = -5814.75862911

atomic energy EATOM = 18704.32991668

Solvation Ediel\_sol = 0.00000000

-----

free energy TOTEN = -1202.77146589 eV

energy without entropy = -1202.77146589 energy(sigma->0) = -1202.77146589

-----

----- Iteration 1( 38) -----

POTLOK: cpu time 0.1706: real time 0.1774

SETDIJ: cpu time 0.0101: real time 0.0101

EDDIAG: cpu time 1.9274: real time 1.9344

RMM-DIIS:  cpu time    5.2430: real time    5.2701

  ORTHCH:  cpu time    0.3543: real time    0.3554

    DOS:  cpu time    0.0004: real time    0.0004

  CHARGE:  cpu time    0.5238: real time    0.5256

  MIXING:  cpu time    0.0131: real time    0.0132

-----

  LOOP:  cpu time    8.2425: real time    8.2865

eigenvalue-minimisations : 1437

total energy-change (2. order) :-0.4445072E-05 (-0.9338061E-08)

number of electron    518.9999723 magnetization    0.9999245

augmentation part    11.7371406 magnetization    0.0541983

Broyden mixing:

rms(total) = 0.20919E-04    rms(broyden)= 0.20905E-04

rms(prec ) = 0.31789E-04

weight for this iteration    100.00

eigenvalues of (default mixing \* dielectric matrix)

average eigenvalue GAMMA= 2.0666

8.1027  8.1027  6.2181  3.9574  3.1961  2.6452  2.6452  1.9964  1.9964  1.3329

1.3329  1.1482  1.1482  1.0112  1.0112  0.8794  0.8794  0.7577  0.7577  0.7612

0.6990 0.6497 0.6497 0.6145 0.6198 0.6198

Free energy of the ion-electron system (eV)

-----

alpha Z        PSCENC =        233.50077011

Ewald energy    TEWEN =        91329.23020906

-Hartree energ DENC =    -107335.92503541

-exchange       EXHF =            0.00000000

-V(xc)+E(xc)    XCENC =        1743.79641312

PAW double counting =    52176.80420244    -52239.72300777

entropy T\*S     EENTRO =        -0.00000000

eigenvalues     EBANDS =       -5814.78493857

atomic energy   EATOM =        18704.32991668

Solvation    Ediel\_sol =        0.00000000

-----

free energy     TOTEN =        -1202.77147034 eV

energy without entropy =    -1202.77147034    energy(sigma->0) =    -1202.77147034

-----

----- Iteration 1( 39) -----

|           |          |         |           |        |
|-----------|----------|---------|-----------|--------|
| POTLOK:   | cpu time | 0.1701: | real time | 0.1821 |
| SETDIJ:   | cpu time | 0.0100: | real time | 0.0101 |
| EDDIAG:   | cpu time | 1.9317: | real time | 1.9383 |
| RMM-DIIS: | cpu time | 5.1461: | real time | 5.1646 |
| ORTHCH:   | cpu time | 0.3541: | real time | 0.3550 |
| DOS:      | cpu time | 0.0004: | real time | 0.0004 |
| CHARGE:   | cpu time | 0.5244: | real time | 0.5263 |
| MIXING:   | cpu time | 0.0134: | real time | 0.0134 |

-----

|       |          |         |           |        |
|-------|----------|---------|-----------|--------|
| LOOP: | cpu time | 8.1503: | real time | 8.1900 |
|-------|----------|---------|-----------|--------|

eigenvalue-minimisations : 1402

total energy-change (2. order) :-0.4926915E-05 (-0.5438121E-08)

|                    |             |               |           |
|--------------------|-------------|---------------|-----------|
| number of electron | 518.9999723 | magnetization | 0.9999848 |
|--------------------|-------------|---------------|-----------|

|                   |            |               |           |
|-------------------|------------|---------------|-----------|
| augmentation part | 11.7371417 | magnetization | 0.0542584 |
|-------------------|------------|---------------|-----------|

Broyden mixing:

rms(total) = 0.13508E-04      rms(broyden)= 0.13498E-04

rms(prec ) = 0.19766E-04

weight for this iteration      100.00

eigenvalues of (default mixing \* dielectric matrix)

average eigenvalue GAMMA=    2.0709

8.3031  8.0755  6.2268  4.1292  3.3724  2.7669  2.7669  2.1025  2.1025  1.5574

1.4047  1.1788  1.1788  1.0154  1.0154  0.9016  0.9016  0.8305  0.7586  0.7586

0.7391  0.6832  0.6463  0.6463  0.6229  0.6135  0.6167

Free energy of the ion-electron system (eV)

-----

alpha Z            PSCENC =            233.50077011

Ewald energy      TEWEN  =            91329.23020906

-Hartree energ DENC    =       -107335.91017291

-exchange          EXHF    =            0.00000000

-V(xc)+E(xc)      XCENC  =            1743.79630335

PAW double counting    =       52176.82772319    -52239.74652447

entropy T\*S        EENTRO =            -0.00000000

eigenvalues        EBANDS =            -5814.79970027

atomic energy      EATOM  =            18704.32991668

Solvation Ediel\_sol = 0.00000000

-----

free energy TOTEN = -1202.77147527 eV

energy without entropy = -1202.77147527 energy(sigma->0) = -1202.77147527

-----

----- Iteration 1( 40) -----

|           |          |         |           |        |
|-----------|----------|---------|-----------|--------|
| POTLOK:   | cpu time | 0.1697: | real time | 0.1874 |
| SETDIJ:   | cpu time | 0.0100: | real time | 0.0100 |
| EDDIAG:   | cpu time | 1.9276: | real time | 1.9341 |
| RMM-DIIS: | cpu time | 5.0390: | real time | 5.0634 |
| ORTHCH:   | cpu time | 0.3567: | real time | 0.3578 |
| DOS:      | cpu time | 0.0004: | real time | 0.0004 |
| CHARGE:   | cpu time | 0.5248: | real time | 0.5265 |

MIXING: cpu time 0.0145: real time 0.0145

-----

LOOP: cpu time 8.0427: real time 8.0942

eigenvalue-minimisations : 1379

total energy-change (2. order) :-0.3339424E-05 (-0.3272575E-08)

number of electron 518.9999723 magnetization 0.9999873

augmentation part 11.7371423 magnetization 0.0542609

Broyden mixing:

rms(total) = 0.87280E-05 rms(broyden)= 0.87220E-05

rms(prec ) = 0.12429E-04

weight for this iteration 100.00

eigenvalues of (default mixing \* dielectric matrix)

average eigenvalue GAMMA= 2.0776

8.4403 8.0564 6.2379 4.4684 3.6043 2.8651 2.8651 2.2538 2.1186 1.6922

1.4394 1.2102 1.2102 1.0868 1.0160 1.0160 0.8817 0.8817 0.7597 0.7597

0.7835 0.7160 0.6731 0.6459 0.6348 0.6287 0.6130 0.6130

Free energy of the ion-electron system (eV)

-----

alpha Z PSCENC = 233.50077011  
Ewald energy TEWEN = 91329.23020906  
-Hartree energy DENC = -107335.90344927  
-exchange EXHF = 0.00000000  
-V(xc)+E(xc) XCENC = 1743.79624664  
PAW double counting = 52176.83057773 -52239.74938493  
entropy T\*S EENTRO = -0.00000000  
eigenvalues EBANDS = -5814.80636463  
atomic energy EATOM = 18704.32991668  
Solvation Ediel\_sol = 0.00000000

-----  
free energy TOTEN = -1202.77147860 eV

energy without entropy = -1202.77147860 energy(sigma->0) = -1202.77147860

|           |          |         |           |        |
|-----------|----------|---------|-----------|--------|
| POTLOK:   | cpu time | 0.1699: | real time | 0.1823 |
| SETDIJ:   | cpu time | 0.0100: | real time | 0.0101 |
| EDDIAG:   | cpu time | 1.9285: | real time | 1.9349 |
| RMM-DIIS: | cpu time | 4.9472: | real time | 4.9642 |
| ORTHCH:   | cpu time | 0.3539: | real time | 0.3549 |
| DOS:      | cpu time | 0.0004: | real time | 0.0004 |
| CHARGE:   | cpu time | 0.5237: | real time | 0.5256 |
| MIXING:   | cpu time | 0.0143: | real time | 0.0143 |
| -----     |          |         |           |        |
| LOOP:     | cpu time | 7.9480: | real time | 7.9867 |

eigenvalue-minimisations : 1349

total energy-change (2. order) :-0.2025554E-05 (-0.1765465E-08)

number of electron 518.9999723 magnetization 0.9999944

augmentation part 11.7371428 magnetization 0.0542681

Broyden mixing:

rms(total) = 0.54637E-05 rms(broyden)= 0.54601E-05

rms(prec ) = 0.78213E-05

weight for this iteration 100.00

eigenvalues of (default mixing \* dielectric matrix)

average eigenvalue GAMMA= 2.0999

8.5633 8.0497 6.2631 5.2176 3.8124 2.9325 2.9325 2.3727 2.2016 1.8256

1.5699 1.2330 1.2330 1.2032 1.0215 1.0215 0.9128 0.9128 0.8578 0.7601

0.7601 0.7475 0.7119 0.6573 0.6499 0.6249 0.6249 0.6169 0.6083

Free energy of the ion-electron system (eV)

-----  
alpha Z PSCENC = 233.50077011

Ewald energy TEWEN = 91329.23020906

-Hartree energy DENC = -107335.90146402

-exchange EXHF = 0.00000000

-V(xc)+E(xc) XCENC = 1743.79622908

PAW double counting = 52176.82928856 -52239.74810012

entropy T\*S EENTRO = -0.00000000

eigenvalues EBANDS = -5814.80832999

atomic energy EATOM = 18704.32991668

Solvation Ediel\_sol = 0.00000000

-----  
free energy TOTEN = -1202.77148063 eV

energy without entropy = -1202.77148063 energy(sigma->0) = -1202.77148063

-----

----- Iteration 1( 42) -----

|           |          |         |           |        |
|-----------|----------|---------|-----------|--------|
| POTLOK:   | cpu time | 0.1664: | real time | 0.1672 |
| SETDIJ:   | cpu time | 0.0086: | real time | 0.0133 |
| EDDIAG:   | cpu time | 1.9333: | real time | 1.9469 |
| RMM-DIIS: | cpu time | 4.8015: | real time | 4.8328 |
| ORTHCH:   | cpu time | 0.3586: | real time | 0.3598 |
| DOS:      | cpu time | 0.0004: | real time | 0.0004 |
| CHARGE:   | cpu time | 0.5264: | real time | 0.5280 |
| MIXING:   | cpu time | 0.0151: | real time | 0.0152 |
| -----     |          |         |           |        |
| LOOP:     | cpu time | 7.8102: | real time | 7.8637 |

eigenvalue-minimisations : 1314

total energy-change (2. order) :-0.1568340E-05 (-0.9289280E-09)

number of electron      518.9999723 magnetization      1.0000019

augmentation part      11.7371431 magnetization      0.0542757

Broyden mixing:

rms(total) = 0.33577E-05      rms(broyden)= 0.33552E-05

rms(prec ) = 0.48066E-05

weight for this iteration      100.00

eigenvalues of (default mixing \* dielectric matrix)

average eigenvalue GAMMA=      2.1044

8.6735   8.0455   6.3433   5.8185   3.9011   2.9660   2.9660   2.5001   2.2229   1.9580

1.5833   1.3741   1.2090   1.2090   1.0228   1.0228   1.0042   0.8872   0.8872   0.8100

0.7626   0.7626   0.7475   0.6913   0.6532   0.6454   0.6296   0.6156   0.6156   0.6043

Free energy of the ion-electron system (eV)

-----

alpha Z      PSCENC =      233.50077011

Ewald energy      TEWEN =      91329.23020906

-Hartree energ DENC      =      -107335.90163131

-exchange      EXHF =      0.00000000

-V(xc)+E(xc) XCENC = 1743.79623707

PAW double counting = 52176.83166797 -52239.75048227

entropy T\*S EENTRO = -0.00000000

eigenvalues EBANDS = -5814.80816951

atomic energy EATOM = 18704.32991668

Solvation Ediel\_sol = 0.00000000

-----

free energy TOTEN = -1202.77148220 eV

energy without entropy = -1202.77148220 energy(sigma->0) = -1202.77148220

-----

----- Iteration 1( 43) -----

POTLOK: cpu time 0.1679: real time 0.1691

SETDIJ: cpu time 0.0099: real time 0.0100

|           |          |         |           |        |
|-----------|----------|---------|-----------|--------|
| EDDIAG:   | cpu time | 1.9252: | real time | 1.9311 |
| RMM-DIIS: | cpu time | 4.5777: | real time | 4.5952 |
| ORTHCH:   | cpu time | 0.3533: | real time | 0.3543 |
| DOS:      | cpu time | 0.0004: | real time | 0.0004 |
| CHARGE:   | cpu time | 0.5243: | real time | 0.5259 |
| MIXING:   | cpu time | 0.0155: | real time | 0.0156 |
| -----     |          |         |           |        |
| LOOP:     | cpu time | 7.5743: | real time | 7.6014 |

eigenvalue-minimisations : 1175

total energy-change (2. order) :-0.3885943E-06 (-0.3893952E-09)

|                    |             |               |           |
|--------------------|-------------|---------------|-----------|
| number of electron | 518.9999723 | magnetization | 1.0000012 |
| augmentation part  | 11.7371432  | magnetization | 0.0542750 |

Broyden mixing:

rms(total) = 0.22296E-05      rms(broyden)= 0.22286E-05

rms( prec ) = 0.31539E-05

weight for this iteration      100.00

eigenvalues of (default mixing \* dielectric matrix)

average eigenvalue GAMMA=    2.1127

8.7637  8.0390  6.5749  6.0687  3.9787  2.9883  2.9883  2.6615  2.2201  2.1514

1.5973 1.5973 1.2493 1.2493 1.1328 1.0218 1.0218 0.9574 0.8884 0.8884  
0.7604 0.7604 0.7791 0.7291 0.6761 0.6518 0.6383 0.6304 0.6150 0.6150  
0.6007

Free energy of the ion-electron system (eV)

-----

alpha Z PSCENC = 233.50077011

Ewald energy TEWEN = 91329.23020906

-Hartree energy DENC = -107335.90235380

-exchange EXHF = 0.00000000

-V(xc)+E(xc) XCENC = 1743.79624880

PAW double counting = 52176.83226743 -52239.75108293

entropy T\*S EENTRO = -0.00000000

eigenvalues EBANDS = -5814.80745794

atomic energy EATOM = 18704.32991668

Solvation Ediel\_sol = 0.00000000

-----

free energy TOTEN = -1202.77148259 eV

energy without entropy = -1202.77148259 energy(sigma->0) = -1202.77148259

-----

----- Iteration 1( 44) -----

|           |          |         |           |        |
|-----------|----------|---------|-----------|--------|
| POTLOK:   | cpu time | 0.1681: | real time | 0.1863 |
| SETDIJ:   | cpu time | 0.0099: | real time | 0.0100 |
| EDDIAG:   | cpu time | 1.9231: | real time | 1.9298 |
| RMM-DIIS: | cpu time | 4.4219: | real time | 4.4458 |
| ORTHCH:   | cpu time | 0.3568: | real time | 0.3578 |
| DOS:      | cpu time | 0.0004: | real time | 0.0004 |
| CHARGE:   | cpu time | 0.5239: | real time | 0.5256 |
| MIXING:   | cpu time | 0.0165: | real time | 0.0166 |

-----

|       |          |         |           |        |
|-------|----------|---------|-----------|--------|
| LOOP: | cpu time | 7.4207: | real time | 7.4723 |
|-------|----------|---------|-----------|--------|

eigenvalue-minimisations : 1076

total energy-change (2. order) :-0.1673689E-06 (-0.1918137E-09)

number of electron 518.9999723 magnetization 0.9999988

augmentation part            11.7371432 magnetization            0.0542726

Broyden mixing:

rms(total) = 0.11806E-05      rms(broyden)= 0.11795E-05

rms(prec ) = 0.15864E-05

weight for this iteration      100.00

eigenvalues of (default mixing \* dielectric matrix)

average eigenvalue GAMMA=    2.1332

8.8850  8.0266  7.0198  6.1536  4.1491  3.4345  2.8760  2.8760  2.3982  2.2007

1.8256  1.5923  1.3052  1.2078  1.2078  1.0222  1.0222  1.0212  0.9140  0.8645

0.8645  0.7617  0.7617  0.7583  0.7109  0.6574  0.6574  0.6279  0.6279  0.6211

0.6110  0.5989

Free energy of the ion-electron system (eV)

-----

alpha Z            PSCENC =            233.50077011

Ewald energy      TEWEN   =            91329.23020906

-Hartree energ    DENC     =            -107335.90344119

-exchange          EXHF     =            0.00000000

-V(xc)+E(xc)      XCENC   =            1743.79626514

PAW double counting   =            52176.83292890    -52239.75174485

entropy T\*S    EENTRO =        -0.00000000

eigenvalues    EBANDS =        -5814.80638662

atomic energy  EATOM  =        18704.32991668

Solvation    Ediel\_sol  =        0.00000000

-----  
free energy    TOTEN  =        -1202.77148275 eV

energy without entropy =    -1202.77148275    energy(sigma->0) =    -1202.77148275

----- Iteration        1( 45) -----

POTLOK:    cpu time    0.1697: real time    0.1839

SETDIJ:    cpu time    0.0100: real time    0.0100

EDDIAG:    cpu time    1.9274: real time    1.9328

RMM-DIIS:    cpu time    4.1690: real time    4.1951

ORTHCH: cpu time 0.3547: real time 0.3555

DOS: cpu time 0.0003: real time 0.0003

-----

LOOP: cpu time 6.6312: real time 6.6777

eigenvalue-minimisations : 964

total energy-change (2. order) :-0.2403976E-07 (-0.1167271E-09)

number of electron 518.9999723 magnetization 0.9999988

augmentation part 11.7371432 magnetization 0.0542726

Free energy of the ion-electron system (eV)

-----

alpha Z PSCENC = 233.50077011

Ewald energy TEWEN = 91329.23020906

-Hartree energy DENC = -107335.90390815

-exchange EXHF = 0.00000000

-V(xc)+E(xc) XCENC = 1743.79627221

PAW double counting = 52176.83304683 -52239.75186274

entropy T\*S EENTRO = -0.00000000

eigenvalues EBANDS = -5814.80592679

atomic energy EATOM = 18704.32991668

Solvation Ediel\_sol = 0.00000000

-----  
free energy TOTEN = -1202.77148278 eV

energy without entropy = -1202.77148278 energy(sigma->0) = -1202.77148278

-----  
average (electrostatic) potential at core

the test charge radii are 0.5201 0.6991 1.0621 0.7215

(the norm of the test charge is 1.0000)

|             |             |             |             |             |
|-------------|-------------|-------------|-------------|-------------|
| 1 -40.7528  | 2 -40.7507  | 3 -40.7521  | 4 -40.7508  | 5 -40.7528  |
| 6 -40.7550  | 7 -40.7525  | 8 -40.7603  | 9 -40.7521  | 10 -40.7597 |
| 11 -40.7535 | 12 -40.7555 | 13 -40.6502 | 14 -40.6961 | 15 -40.7700 |
| 16 -40.6982 | 17 -40.6921 | 18 -40.8606 | 19 -40.6792 | 20 -40.6671 |
| 21 -40.6886 | 22 -40.6616 | 23 -40.0851 | 24 -40.1279 | 25 -57.4589 |
| 26 -57.6700 | 27 -57.6569 | 28 -57.4688 | 29 -57.6636 | 30 -57.4589 |
| 31 -57.6698 | 32 -57.6565 | 33 -57.4667 | 34 -57.6684 | 35 -57.4597 |
| 36 -57.6717 | 37 -57.6565 | 38 -57.4690 | 39 -57.6743 | 40 -57.4587 |

|              |              |              |              |              |
|--------------|--------------|--------------|--------------|--------------|
| 41 -57.6757  | 42 -57.6567  | 43 -57.4739  | 44 -57.6889  | 45 -57.4587  |
| 46 -57.6746  | 47 -57.6575  | 48 -57.4741  | 49 -57.6800  | 50 -57.4599  |
| 51 -57.6713  | 52 -57.6572  | 53 -57.4717  | 54 -57.6663  | 55 -57.6367  |
| 56 -57.6628  | 57 -57.6871  | 58 -57.6834  | 59 -57.6665  | 60 -57.6693  |
| 61 -57.6902  | 62 -57.6749  | 63 -57.6370  | 64 -57.6622  | 65 -57.6892  |
| 66 -57.6949  | 67 -57.6647  | 68 -57.6691  | 69 -57.6939  | 70 -57.7012  |
| 71 -57.6365  | 72 -57.6636  | 73 -57.6968  | 74 -57.7219  | 75 -57.6656  |
| 76 -57.6697  | 77 -57.7062  | 78 -57.7515  | 79 -57.6367  | 80 -57.6662  |
| 81 -57.7106  | 82 -57.7523  | 83 -57.6689  | 84 -57.6712  | 85 -57.7376  |
| 86 -57.8417  | 87 -57.6391  | 88 -57.6669  | 89 -57.7125  | 90 -57.7172  |
| 91 -57.6736  | 92 -57.6714  | 93 -57.7423  | 94 -57.7598  | 95 -57.6374  |
| 96 -57.6651  | 97 -57.6962  | 98 -57.6908  | 99 -57.6709  | 100 -57.6702 |
| 101 -57.7080 | 102 -57.6860 | 103 -57.6603 | 104 -57.6309 | 105 -57.6457 |
| 106 -57.2901 | 107 -57.3881 | 108 -57.6312 | 109 -57.5976 | 110 -57.6592 |
| 111 -57.6309 | 112 -57.6423 | 113 -57.3091 | 114 -57.3938 | 115 -57.6305 |
| 116 -57.5995 | 117 -57.6585 | 118 -57.6226 | 119 -57.6982 | 120 -57.6833 |
| 121 -57.3874 | 122 -57.6293 | 123 -57.7095 | 124 -57.6594 | 125 -57.6254 |
| 126 -57.8335 | 127 -58.3289 | 128 -57.3607 | 129 -57.6346 | 130 -58.1438 |
| 131 -57.6674 | 132 -57.6346 | 133 -57.8009 | 134 -57.4165 | 135 -57.3720 |
| 136 -57.6385 | 137 -58.0783 | 138 -57.6638 | 139 -57.6304 | 140 -57.6714 |
| 141 -57.2993 | 142 -57.3782 | 143 -57.6338 | 144 -57.6478 | 145 -60.8466 |
| 146 -57.3145 | 147 -81.2713 |              |              |              |

E-fermi : -2.3578      XC(G=0): -2.7341      alpha+bet : -2.2521

spin component 1

k-point    1 :        0.0000    0.0000    0.0000

| band No. | band energies | occupation |
|----------|---------------|------------|
| 1        | -26.9864      | 1.00000    |
| 2        | -21.5687      | 1.00000    |
| 3        | -21.4717      | 1.00000    |
| 4        | -21.0998      | 1.00000    |
| 5        | -21.0688      | 1.00000    |
| 6        | -21.0149      | 1.00000    |
| 7        | -20.9789      | 1.00000    |
| 8        | -20.9769      | 1.00000    |
| 9        | -20.8913      | 1.00000    |
| 10       | -20.5579      | 1.00000    |
| 11       | -20.5035      | 1.00000    |
| 12       | -20.4118      | 1.00000    |

|    |          |         |
|----|----------|---------|
| 13 | -20.3982 | 1.00000 |
| 14 | -20.1266 | 1.00000 |
| 15 | -19.9760 | 1.00000 |
| 16 | -19.7035 | 1.00000 |
| 17 | -19.6277 | 1.00000 |
| 18 | -19.5998 | 1.00000 |
| 19 | -19.5841 | 1.00000 |
| 20 | -19.5288 | 1.00000 |
| 21 | -19.5271 | 1.00000 |
| 22 | -19.4988 | 1.00000 |
| 23 | -19.4813 | 1.00000 |
| 24 | -19.1121 | 1.00000 |
| 25 | -19.0755 | 1.00000 |
| 26 | -18.9787 | 1.00000 |
| 27 | -18.9650 | 1.00000 |
| 28 | -18.9008 | 1.00000 |
| 29 | -18.7337 | 1.00000 |
| 30 | -18.5049 | 1.00000 |
| 31 | -18.3593 | 1.00000 |
| 32 | -18.2755 | 1.00000 |
| 33 | -18.2523 | 1.00000 |
| 34 | -18.1838 | 1.00000 |

|    |          |         |
|----|----------|---------|
| 35 | -18.1817 | 1.00000 |
| 36 | -18.0800 | 1.00000 |
| 37 | -18.0762 | 1.00000 |
| 38 | -17.5619 | 1.00000 |
| 39 | -17.3135 | 1.00000 |
| 40 | -17.2878 | 1.00000 |
| 41 | -17.2829 | 1.00000 |
| 42 | -17.2102 | 1.00000 |
| 43 | -17.2037 | 1.00000 |
| 44 | -17.1770 | 1.00000 |
| 45 | -17.0230 | 1.00000 |
| 46 | -16.9505 | 1.00000 |
| 47 | -16.9328 | 1.00000 |
| 48 | -16.8934 | 1.00000 |
| 49 | -16.8915 | 1.00000 |
| 50 | -16.8503 | 1.00000 |
| 51 | -16.8419 | 1.00000 |
| 52 | -16.8213 | 1.00000 |
| 53 | -16.8191 | 1.00000 |
| 54 | -16.7296 | 1.00000 |
| 55 | -16.7264 | 1.00000 |
| 56 | -16.1777 | 1.00000 |

|    |          |         |
|----|----------|---------|
| 57 | -15.7298 | 1.00000 |
| 58 | -15.6923 | 1.00000 |
| 59 | -15.6606 | 1.00000 |
| 60 | -15.6373 | 1.00000 |
| 61 | -15.6164 | 1.00000 |
| 62 | -15.5539 | 1.00000 |
| 63 | -15.5500 | 1.00000 |
| 64 | -15.1754 | 1.00000 |
| 65 | -14.8101 | 1.00000 |
| 66 | -14.6086 | 1.00000 |
| 67 | -14.5783 | 1.00000 |
| 68 | -14.5351 | 1.00000 |
| 69 | -14.4985 | 1.00000 |
| 70 | -14.4688 | 1.00000 |
| 71 | -14.4426 | 1.00000 |
| 72 | -14.3341 | 1.00000 |
| 73 | -14.3058 | 1.00000 |
| 74 | -14.2799 | 1.00000 |
| 75 | -14.2723 | 1.00000 |
| 76 | -14.1827 | 1.00000 |
| 77 | -14.1788 | 1.00000 |
| 78 | -13.8905 | 1.00000 |

|     |          |         |
|-----|----------|---------|
| 79  | -13.7601 | 1.00000 |
| 80  | -13.5938 | 1.00000 |
| 81  | -13.5486 | 1.00000 |
| 82  | -13.5296 | 1.00000 |
| 83  | -13.4980 | 1.00000 |
| 84  | -13.4461 | 1.00000 |
| 85  | -13.3643 | 1.00000 |
| 86  | -13.3457 | 1.00000 |
| 87  | -13.1891 | 1.00000 |
| 88  | -12.7866 | 1.00000 |
| 89  | -12.7597 | 1.00000 |
| 90  | -12.7275 | 1.00000 |
| 91  | -12.6963 | 1.00000 |
| 92  | -12.6865 | 1.00000 |
| 93  | -12.6242 | 1.00000 |
| 94  | -12.4613 | 1.00000 |
| 95  | -12.4465 | 1.00000 |
| 96  | -12.3821 | 1.00000 |
| 97  | -12.3242 | 1.00000 |
| 98  | -12.2132 | 1.00000 |
| 99  | -12.2036 | 1.00000 |
| 100 | -12.1653 | 1.00000 |

|     |          |         |
|-----|----------|---------|
| 101 | -11.9488 | 1.00000 |
| 102 | -11.6850 | 1.00000 |
| 103 | -11.6282 | 1.00000 |
| 104 | -11.6113 | 1.00000 |
| 105 | -11.5792 | 1.00000 |
| 106 | -11.1039 | 1.00000 |
| 107 | -11.0736 | 1.00000 |
| 108 | -10.8989 | 1.00000 |
| 109 | -10.8878 | 1.00000 |
| 110 | -10.8323 | 1.00000 |
| 111 | -10.7110 | 1.00000 |
| 112 | -10.6801 | 1.00000 |
| 113 | -10.6623 | 1.00000 |
| 114 | -10.6468 | 1.00000 |
| 115 | -10.5896 | 1.00000 |
| 116 | -10.5811 | 1.00000 |
| 117 | -10.5719 | 1.00000 |
| 118 | -10.5681 | 1.00000 |
| 119 | -10.5264 | 1.00000 |
| 120 | -10.5256 | 1.00000 |
| 121 | -10.5108 | 1.00000 |
| 122 | -10.5030 | 1.00000 |

|     |          |         |
|-----|----------|---------|
| 123 | -10.3788 | 1.00000 |
| 124 | -10.2941 | 1.00000 |
| 125 | -10.2567 | 1.00000 |
| 126 | -10.1878 | 1.00000 |
| 127 | -10.1867 | 1.00000 |
| 128 | -10.0727 | 1.00000 |
| 129 | -10.0329 | 1.00000 |
| 130 | -9.8915  | 1.00000 |
| 131 | -9.8655  | 1.00000 |
| 132 | -9.7943  | 1.00000 |
| 133 | -9.7863  | 1.00000 |
| 134 | -9.7568  | 1.00000 |
| 135 | -9.6918  | 1.00000 |
| 136 | -9.4498  | 1.00000 |
| 137 | -9.4255  | 1.00000 |
| 138 | -9.3952  | 1.00000 |
| 139 | -9.3882  | 1.00000 |
| 140 | -9.3800  | 1.00000 |
| 141 | -9.3694  | 1.00000 |
| 142 | -9.3105  | 1.00000 |
| 143 | -9.3037  | 1.00000 |
| 144 | -9.2993  | 1.00000 |

|     |         |         |
|-----|---------|---------|
| 145 | -9.2851 | 1.00000 |
| 146 | -9.2703 | 1.00000 |
| 147 | -9.0919 | 1.00000 |
| 148 | -9.0043 | 1.00000 |
| 149 | -8.9862 | 1.00000 |
| 150 | -8.9573 | 1.00000 |
| 151 | -8.9559 | 1.00000 |
| 152 | -8.7932 | 1.00000 |
| 153 | -8.7458 | 1.00000 |
| 154 | -8.7346 | 1.00000 |
| 155 | -8.7181 | 1.00000 |
| 156 | -8.7088 | 1.00000 |
| 157 | -8.6873 | 1.00000 |
| 158 | -8.6781 | 1.00000 |
| 159 | -8.6686 | 1.00000 |
| 160 | -8.6539 | 1.00000 |
| 161 | -8.5946 | 1.00000 |
| 162 | -8.5830 | 1.00000 |
| 163 | -8.5762 | 1.00000 |
| 164 | -8.5678 | 1.00000 |
| 165 | -8.4879 | 1.00000 |
| 166 | -8.4571 | 1.00000 |

|     |         |         |
|-----|---------|---------|
| 167 | -8.4360 | 1.00000 |
| 168 | -8.3455 | 1.00000 |
| 169 | -8.2975 | 1.00000 |
| 170 | -8.2747 | 1.00000 |
| 171 | -8.2637 | 1.00000 |
| 172 | -8.2333 | 1.00000 |
| 173 | -8.2322 | 1.00000 |
| 174 | -8.1516 | 1.00000 |
| 175 | -8.1452 | 1.00000 |
| 176 | -8.0776 | 1.00000 |
| 177 | -8.0443 | 1.00000 |
| 178 | -8.0262 | 1.00000 |
| 179 | -8.0216 | 1.00000 |
| 180 | -7.9730 | 1.00000 |
| 181 | -7.9645 | 1.00000 |
| 182 | -7.9245 | 1.00000 |
| 183 | -7.9006 | 1.00000 |
| 184 | -7.8851 | 1.00000 |
| 185 | -7.8723 | 1.00000 |
| 186 | -7.8007 | 1.00000 |
| 187 | -7.7973 | 1.00000 |
| 188 | -7.7476 | 1.00000 |

|     |         |         |
|-----|---------|---------|
| 189 | -7.7105 | 1.00000 |
| 190 | -7.6662 | 1.00000 |
| 191 | -7.5998 | 1.00000 |
| 192 | -7.5848 | 1.00000 |
| 193 | -7.5757 | 1.00000 |
| 194 | -7.5472 | 1.00000 |
| 195 | -7.4806 | 1.00000 |
| 196 | -7.4800 | 1.00000 |
| 197 | -7.4286 | 1.00000 |
| 198 | -7.3244 | 1.00000 |
| 199 | -7.2493 | 1.00000 |
| 200 | -7.1571 | 1.00000 |
| 201 | -7.0663 | 1.00000 |
| 202 | -7.0419 | 1.00000 |
| 203 | -7.0281 | 1.00000 |
| 204 | -7.0134 | 1.00000 |
| 205 | -6.9965 | 1.00000 |
| 206 | -6.9897 | 1.00000 |
| 207 | -6.9753 | 1.00000 |
| 208 | -6.8664 | 1.00000 |
| 209 | -6.8206 | 1.00000 |
| 210 | -6.8015 | 1.00000 |

|     |         |         |
|-----|---------|---------|
| 211 | -6.7931 | 1.00000 |
| 212 | -6.7320 | 1.00000 |
| 213 | -6.6868 | 1.00000 |
| 214 | -6.4709 | 1.00000 |
| 215 | -6.4250 | 1.00000 |
| 216 | -6.3959 | 1.00000 |
| 217 | -6.3911 | 1.00000 |
| 218 | -6.3740 | 1.00000 |
| 219 | -6.3724 | 1.00000 |
| 220 | -6.3171 | 1.00000 |
| 221 | -6.3072 | 1.00000 |
| 222 | -6.2368 | 1.00000 |
| 223 | -6.2297 | 1.00000 |
| 224 | -6.2292 | 1.00000 |
| 225 | -6.0776 | 1.00000 |
| 226 | -6.0375 | 1.00000 |
| 227 | -5.7926 | 1.00000 |
| 228 | -5.7521 | 1.00000 |
| 229 | -5.6938 | 1.00000 |
| 230 | -5.6411 | 1.00000 |
| 231 | -5.6372 | 1.00000 |
| 232 | -5.5589 | 1.00000 |

|     |         |         |
|-----|---------|---------|
| 233 | -5.5303 | 1.00000 |
| 234 | -5.4677 | 1.00000 |
| 235 | -5.4392 | 1.00000 |
| 236 | -5.1656 | 1.00000 |
| 237 | -5.0586 | 1.00000 |
| 238 | -5.0505 | 1.00000 |
| 239 | -5.0182 | 1.00000 |
| 240 | -4.9889 | 1.00000 |
| 241 | -4.9105 | 1.00000 |
| 242 | -4.8535 | 1.00000 |
| 243 | -4.8224 | 1.00000 |
| 244 | -4.7897 | 1.00000 |
| 245 | -4.6811 | 1.00000 |
| 246 | -4.5726 | 1.00000 |
| 247 | -4.5713 | 1.00000 |
| 248 | -4.5056 | 1.00000 |
| 249 | -4.4456 | 1.00000 |
| 250 | -4.3837 | 1.00000 |
| 251 | -4.2928 | 1.00000 |
| 252 | -4.2657 | 1.00000 |
| 253 | -4.2127 | 1.00000 |
| 254 | -3.5588 | 1.00000 |

|     |         |         |
|-----|---------|---------|
| 255 | -3.3545 | 1.00000 |
| 256 | -3.2008 | 1.00000 |
| 257 | -2.9393 | 1.00000 |
| 258 | -2.8483 | 1.00000 |
| 259 | -2.8236 | 1.00000 |
| 260 | -2.6068 | 1.00000 |
| 261 | -1.9086 | 0.00000 |
| 262 | -1.7678 | 0.00000 |
| 263 | -1.7188 | 0.00000 |
| 264 | -1.3448 | 0.00000 |
| 265 | -1.3046 | 0.00000 |
| 266 | -1.1905 | 0.00000 |
| 267 | -0.7445 | 0.00000 |
| 268 | -0.5846 | 0.00000 |
| 269 | -0.5019 | 0.00000 |
| 270 | -0.3079 | 0.00000 |
| 271 | -0.3057 | 0.00000 |
| 272 | -0.2900 | 0.00000 |
| 273 | -0.1830 | 0.00000 |
| 274 | -0.0579 | 0.00000 |
| 275 | -0.0497 | 0.00000 |
| 276 | -0.0102 | 0.00000 |

|     |        |         |
|-----|--------|---------|
| 277 | 0.0350 | 0.00000 |
| 278 | 0.0844 | 0.00000 |
| 279 | 0.1730 | 0.00000 |
| 280 | 0.2205 | 0.00000 |
| 281 | 0.2481 | 0.00000 |
| 282 | 0.4203 | 0.00000 |
| 283 | 0.4479 | 0.00000 |
| 284 | 0.4818 | 0.00000 |
| 285 | 0.5977 | 0.00000 |
| 286 | 0.6748 | 0.00000 |
| 287 | 0.8188 | 0.00000 |
| 288 | 0.8731 | 0.00000 |
| 289 | 1.0471 | 0.00000 |
| 290 | 1.0867 | 0.00000 |
| 291 | 1.1208 | 0.00000 |
| 292 | 1.1625 | 0.00000 |
| 293 | 1.2232 | 0.00000 |
| 294 | 1.2444 | 0.00000 |
| 295 | 1.2875 | 0.00000 |
| 296 | 1.3143 | 0.00000 |
| 297 | 1.3464 | 0.00000 |
| 298 | 1.4116 | 0.00000 |

|     |        |         |
|-----|--------|---------|
| 299 | 1.4661 | 0.00000 |
| 300 | 1.4829 | 0.00000 |
| 301 | 1.5532 | 0.00000 |
| 302 | 1.5868 | 0.00000 |
| 303 | 1.6245 | 0.00000 |
| 304 | 1.6777 | 0.00000 |
| 305 | 1.7508 | 0.00000 |
| 306 | 1.7631 | 0.00000 |
| 307 | 1.8740 | 0.00000 |
| 308 | 1.8947 | 0.00000 |
| 309 | 1.9048 | 0.00000 |
| 310 | 1.9137 | 0.00000 |
| 311 | 2.1232 | 0.00000 |
| 312 | 2.1870 | 0.00000 |
| 313 | 2.2084 | 0.00000 |
| 314 | 2.2351 | 0.00000 |
| 315 | 2.2756 | 0.00000 |
| 316 | 2.2918 | 0.00000 |
| 317 | 2.3314 | 0.00000 |
| 318 | 2.3533 | 0.00000 |
| 319 | 2.3722 | 0.00000 |
| 320 | 2.3979 | 0.00000 |

|     |        |         |
|-----|--------|---------|
| 321 | 2.4201 | 0.00000 |
| 322 | 2.4301 | 0.00000 |
| 323 | 2.4401 | 0.00000 |
| 324 | 2.4532 | 0.00000 |
| 325 | 2.4617 | 0.00000 |
| 326 | 2.5246 | 0.00000 |
| 327 | 2.5391 | 0.00000 |
| 328 | 2.7010 | 0.00000 |
| 329 | 2.7287 | 0.00000 |
| 330 | 2.7531 | 0.00000 |
| 331 | 2.7565 | 0.00000 |
| 332 | 2.7651 | 0.00000 |
| 333 | 2.8145 | 0.00000 |
| 334 | 2.8340 | 0.00000 |
| 335 | 2.8592 | 0.00000 |
| 336 | 2.8913 | 0.00000 |
| 337 | 2.9240 | 0.00000 |
| 338 | 2.9464 | 0.00000 |
| 339 | 2.9786 | 0.00000 |
| 340 | 3.0051 | 0.00000 |
| 341 | 3.0340 | 0.00000 |
| 342 | 3.0440 | 0.00000 |

|     |        |         |
|-----|--------|---------|
| 343 | 3.0660 | 0.00000 |
| 344 | 3.0849 | 0.00000 |
| 345 | 3.1502 | 0.00000 |
| 346 | 3.1626 | 0.00000 |
| 347 | 3.1798 | 0.00000 |
| 348 | 3.1918 | 0.00000 |
| 349 | 3.3014 | 0.00000 |
| 350 | 3.3231 | 0.00000 |
| 351 | 3.3528 | 0.00000 |
| 352 | 3.3680 | 0.00000 |
| 353 | 3.3898 | 0.00000 |
| 354 | 3.4331 | 0.00000 |
| 355 | 3.4764 | 0.00000 |
| 356 | 3.4847 | 0.00000 |
| 357 | 3.4859 | 0.00000 |
| 358 | 3.4985 | 0.00000 |
| 359 | 3.6344 | 0.00000 |
| 360 | 3.6730 | 0.00000 |
| 361 | 3.6870 | 0.00000 |
| 362 | 3.7324 | 0.00000 |
| 363 | 3.7512 | 0.00000 |
| 364 | 3.7588 | 0.00000 |

|     |        |         |
|-----|--------|---------|
| 365 | 3.7723 | 0.00000 |
| 366 | 3.7937 | 0.00000 |
| 367 | 3.8119 | 0.00000 |
| 368 | 3.8338 | 0.00000 |
| 369 | 3.8381 | 0.00000 |
| 370 | 3.8518 | 0.00000 |
| 371 | 3.8765 | 0.00000 |
| 372 | 3.8837 | 0.00000 |
| 373 | 3.9101 | 0.00000 |
| 374 | 3.9238 | 0.00000 |
| 375 | 3.9339 | 0.00000 |
| 376 | 3.9575 | 0.00000 |
| 377 | 3.9726 | 0.00000 |
| 378 | 3.9841 | 0.00000 |
| 379 | 4.0161 | 0.00000 |
| 380 | 4.0690 | 0.00000 |
| 381 | 4.1646 | 0.00000 |
| 382 | 4.2465 | 0.00000 |
| 383 | 4.2577 | 0.00000 |
| 384 | 4.2586 | 0.00000 |
| 385 | 4.2854 | 0.00000 |
| 386 | 4.3134 | 0.00000 |

|     |        |         |
|-----|--------|---------|
| 387 | 4.3279 | 0.00000 |
| 388 | 4.3415 | 0.00000 |
| 389 | 4.3711 | 0.00000 |
| 390 | 4.3810 | 0.00000 |
| 391 | 4.4176 | 0.00000 |
| 392 | 4.4449 | 0.00000 |
| 393 | 4.4692 | 0.00000 |
| 394 | 4.4806 | 0.00000 |
| 395 | 4.4862 | 0.00000 |
| 396 | 4.4966 | 0.00000 |
| 397 | 4.5176 | 0.00000 |
| 398 | 4.5507 | 0.00000 |
| 399 | 4.5903 | 0.00000 |
| 400 | 4.6077 | 0.00000 |
| 401 | 4.6269 | 0.00000 |
| 402 | 4.6426 | 0.00000 |
| 403 | 4.6567 | 0.00000 |
| 404 | 4.6796 | 0.00000 |
| 405 | 4.7040 | 0.00000 |
| 406 | 4.7317 | 0.00000 |
| 407 | 4.7464 | 0.00000 |
| 408 | 4.7673 | 0.00000 |

|     |        |         |
|-----|--------|---------|
| 409 | 4.7834 | 0.00000 |
| 410 | 4.7835 | 0.00000 |
| 411 | 4.7973 | 0.00000 |
| 412 | 4.8283 | 0.00000 |
| 413 | 4.8631 | 0.00000 |
| 414 | 4.8720 | 0.00000 |
| 415 | 4.8979 | 0.00000 |
| 416 | 4.9314 | 0.00000 |
| 417 | 4.9838 | 0.00000 |
| 418 | 5.0047 | 0.00000 |
| 419 | 5.0107 | 0.00000 |
| 420 | 5.0351 | 0.00000 |
| 421 | 5.0390 | 0.00000 |
| 422 | 5.0648 | 0.00000 |
| 423 | 5.0820 | 0.00000 |
| 424 | 5.1146 | 0.00000 |
| 425 | 5.1178 | 0.00000 |
| 426 | 5.1371 | 0.00000 |
| 427 | 5.1411 | 0.00000 |
| 428 | 5.1539 | 0.00000 |
| 429 | 5.1756 | 0.00000 |
| 430 | 5.1854 | 0.00000 |

|     |        |         |
|-----|--------|---------|
| 431 | 5.1885 | 0.00000 |
| 432 | 5.2165 | 0.00000 |
| 433 | 5.2356 | 0.00000 |
| 434 | 5.2417 | 0.00000 |
| 435 | 5.2563 | 0.00000 |
| 436 | 5.2903 | 0.00000 |
| 437 | 5.2959 | 0.00000 |
| 438 | 5.3104 | 0.00000 |
| 439 | 5.3347 | 0.00000 |
| 440 | 5.3508 | 0.00000 |
| 441 | 5.3677 | 0.00000 |
| 442 | 5.3747 | 0.00000 |
| 443 | 5.3938 | 0.00000 |
| 444 | 5.4242 | 0.00000 |
| 445 | 5.4599 | 0.00000 |
| 446 | 5.4711 | 0.00000 |
| 447 | 5.4861 | 0.00000 |
| 448 | 5.5045 | 0.00000 |
| 449 | 5.5242 | 0.00000 |
| 450 | 5.5554 | 0.00000 |
| 451 | 5.5768 | 0.00000 |
| 452 | 5.5809 | 0.00000 |

|     |        |         |
|-----|--------|---------|
| 453 | 5.6099 | 0.00000 |
| 454 | 5.6187 | 0.00000 |
| 455 | 5.6644 | 0.00000 |
| 456 | 5.6885 | 0.00000 |
| 457 | 5.7297 | 0.00000 |
| 458 | 5.7524 | 0.00000 |
| 459 | 5.7706 | 0.00000 |
| 460 | 5.8012 | 0.00000 |
| 461 | 5.8028 | 0.00000 |
| 462 | 5.8119 | 0.00000 |
| 463 | 5.8187 | 0.00000 |
| 464 | 5.8501 | 0.00000 |
| 465 | 5.8603 | 0.00000 |
| 466 | 5.8823 | 0.00000 |
| 467 | 5.8921 | 0.00000 |
| 468 | 5.9053 | 0.00000 |
| 469 | 5.9182 | 0.00000 |
| 470 | 5.9249 | 0.00000 |
| 471 | 5.9550 | 0.00000 |
| 472 | 5.9929 | 0.00000 |
| 473 | 6.0092 | 0.00000 |
| 474 | 6.0201 | 0.00000 |

|     |        |         |
|-----|--------|---------|
| 475 | 6.0594 | 0.00000 |
| 476 | 6.0916 | 0.00000 |
| 477 | 6.1296 | 0.00000 |
| 478 | 6.1600 | 0.00000 |
| 479 | 6.2636 | 0.00000 |
| 480 | 6.3499 | 0.00000 |

spin component 2

k-point 1 : 0.0000 0.0000 0.0000

| band No. | band energies | occupation |
|----------|---------------|------------|
| 1        | -26.9797      | 1.00000    |
| 2        | -21.5675      | 1.00000    |
| 3        | -21.4701      | 1.00000    |
| 4        | -21.0979      | 1.00000    |
| 5        | -21.0679      | 1.00000    |
| 6        | -21.0122      | 1.00000    |
| 7        | -20.9774      | 1.00000    |
| 8        | -20.9750      | 1.00000    |
| 9        | -20.8807      | 1.00000    |
| 10       | -20.5550      | 1.00000    |
| 11       | -20.5001      | 1.00000    |

|    |          |         |
|----|----------|---------|
| 12 | -20.4007 | 1.00000 |
| 13 | -20.3886 | 1.00000 |
| 14 | -20.1224 | 1.00000 |
| 15 | -19.9529 | 1.00000 |
| 16 | -19.7007 | 1.00000 |
| 17 | -19.6264 | 1.00000 |
| 18 | -19.5977 | 1.00000 |
| 19 | -19.5777 | 1.00000 |
| 20 | -19.5275 | 1.00000 |
| 21 | -19.5253 | 1.00000 |
| 22 | -19.4762 | 1.00000 |
| 23 | -19.4618 | 1.00000 |
| 24 | -19.1097 | 1.00000 |
| 25 | -19.0731 | 1.00000 |
| 26 | -18.9688 | 1.00000 |
| 27 | -18.9555 | 1.00000 |
| 28 | -18.8960 | 1.00000 |
| 29 | -18.7041 | 1.00000 |
| 30 | -18.5019 | 1.00000 |
| 31 | -18.3523 | 1.00000 |
| 32 | -18.2474 | 1.00000 |
| 33 | -18.2272 | 1.00000 |

|    |          |         |
|----|----------|---------|
| 34 | -18.1785 | 1.00000 |
| 35 | -18.1763 | 1.00000 |
| 36 | -18.0599 | 1.00000 |
| 37 | -18.0566 | 1.00000 |
| 38 | -17.5585 | 1.00000 |
| 39 | -17.2973 | 1.00000 |
| 40 | -17.2872 | 1.00000 |
| 41 | -17.2736 | 1.00000 |
| 42 | -17.2078 | 1.00000 |
| 43 | -17.2068 | 1.00000 |
| 44 | -17.1740 | 1.00000 |
| 45 | -17.0190 | 1.00000 |
| 46 | -16.9416 | 1.00000 |
| 47 | -16.9224 | 1.00000 |
| 48 | -16.8708 | 1.00000 |
| 49 | -16.8698 | 1.00000 |
| 50 | -16.8294 | 1.00000 |
| 51 | -16.8231 | 1.00000 |
| 52 | -16.8180 | 1.00000 |
| 53 | -16.8156 | 1.00000 |
| 54 | -16.7313 | 1.00000 |
| 55 | -16.7253 | 1.00000 |

|    |          |         |
|----|----------|---------|
| 56 | -16.1750 | 1.00000 |
| 57 | -15.7290 | 1.00000 |
| 58 | -15.6579 | 1.00000 |
| 59 | -15.6436 | 1.00000 |
| 60 | -15.6211 | 1.00000 |
| 61 | -15.5668 | 1.00000 |
| 62 | -15.5280 | 1.00000 |
| 63 | -15.5253 | 1.00000 |
| 64 | -15.1717 | 1.00000 |
| 65 | -14.8079 | 1.00000 |
| 66 | -14.6065 | 1.00000 |
| 67 | -14.5607 | 1.00000 |
| 68 | -14.5005 | 1.00000 |
| 69 | -14.4987 | 1.00000 |
| 70 | -14.4648 | 1.00000 |
| 71 | -14.4383 | 1.00000 |
| 72 | -14.3307 | 1.00000 |
| 73 | -14.2981 | 1.00000 |
| 74 | -14.2682 | 1.00000 |
| 75 | -14.2640 | 1.00000 |
| 76 | -14.1646 | 1.00000 |
| 77 | -14.1612 | 1.00000 |

|    |          |         |
|----|----------|---------|
| 78 | -13.8896 | 1.00000 |
| 79 | -13.7577 | 1.00000 |
| 80 | -13.5911 | 1.00000 |
| 81 | -13.5381 | 1.00000 |
| 82 | -13.5185 | 1.00000 |
| 83 | -13.4944 | 1.00000 |
| 84 | -13.4443 | 1.00000 |
| 85 | -13.3438 | 1.00000 |
| 86 | -13.3412 | 1.00000 |
| 87 | -13.1876 | 1.00000 |
| 88 | -12.7803 | 1.00000 |
| 89 | -12.7502 | 1.00000 |
| 90 | -12.7186 | 1.00000 |
| 91 | -12.6777 | 1.00000 |
| 92 | -12.6708 | 1.00000 |
| 93 | -12.6219 | 1.00000 |
| 94 | -12.4488 | 1.00000 |
| 95 | -12.4317 | 1.00000 |
| 96 | -12.3786 | 1.00000 |
| 97 | -12.3233 | 1.00000 |
| 98 | -12.2086 | 1.00000 |
| 99 | -12.1984 | 1.00000 |

|     |          |         |
|-----|----------|---------|
| 100 | -12.1637 | 1.00000 |
| 101 | -11.9460 | 1.00000 |
| 102 | -11.6820 | 1.00000 |
| 103 | -11.6119 | 1.00000 |
| 104 | -11.5921 | 1.00000 |
| 105 | -11.5718 | 1.00000 |
| 106 | -11.1016 | 1.00000 |
| 107 | -11.0710 | 1.00000 |
| 108 | -10.8898 | 1.00000 |
| 109 | -10.8773 | 1.00000 |
| 110 | -10.8294 | 1.00000 |
| 111 | -10.7049 | 1.00000 |
| 112 | -10.6790 | 1.00000 |
| 113 | -10.6593 | 1.00000 |
| 114 | -10.6419 | 1.00000 |
| 115 | -10.5816 | 1.00000 |
| 116 | -10.5742 | 1.00000 |
| 117 | -10.5691 | 1.00000 |
| 118 | -10.5651 | 1.00000 |
| 119 | -10.5158 | 1.00000 |
| 120 | -10.5149 | 1.00000 |
| 121 | -10.5016 | 1.00000 |

|     |          |         |
|-----|----------|---------|
| 122 | -10.4970 | 1.00000 |
| 123 | -10.3779 | 1.00000 |
| 124 | -10.2932 | 1.00000 |
| 125 | -10.2557 | 1.00000 |
| 126 | -10.1844 | 1.00000 |
| 127 | -10.1832 | 1.00000 |
| 128 | -10.0618 | 1.00000 |
| 129 | -10.0265 | 1.00000 |
| 130 | -9.8887  | 1.00000 |
| 131 | -9.8633  | 1.00000 |
| 132 | -9.7864  | 1.00000 |
| 133 | -9.7772  | 1.00000 |
| 134 | -9.7541  | 1.00000 |
| 135 | -9.6894  | 1.00000 |
| 136 | -9.4481  | 1.00000 |
| 137 | -9.4221  | 1.00000 |
| 138 | -9.3841  | 1.00000 |
| 139 | -9.3793  | 1.00000 |
| 140 | -9.3724  | 1.00000 |
| 141 | -9.3597  | 1.00000 |
| 142 | -9.3081  | 1.00000 |
| 143 | -9.3008  | 1.00000 |

|     |         |         |
|-----|---------|---------|
| 144 | -9.2986 | 1.00000 |
| 145 | -9.2842 | 1.00000 |
| 146 | -9.2480 | 1.00000 |
| 147 | -9.0907 | 1.00000 |
| 148 | -9.0007 | 1.00000 |
| 149 | -8.9806 | 1.00000 |
| 150 | -8.9438 | 1.00000 |
| 151 | -8.9426 | 1.00000 |
| 152 | -8.7906 | 1.00000 |
| 153 | -8.7378 | 1.00000 |
| 154 | -8.7322 | 1.00000 |
| 155 | -8.7125 | 1.00000 |
| 156 | -8.7056 | 1.00000 |
| 157 | -8.6702 | 1.00000 |
| 158 | -8.6639 | 1.00000 |
| 159 | -8.6563 | 1.00000 |
| 160 | -8.6531 | 1.00000 |
| 161 | -8.5773 | 1.00000 |
| 162 | -8.5711 | 1.00000 |
| 163 | -8.5663 | 1.00000 |
| 164 | -8.5492 | 1.00000 |
| 165 | -8.4875 | 1.00000 |

|     |         |         |
|-----|---------|---------|
| 166 | -8.4565 | 1.00000 |
| 167 | -8.4344 | 1.00000 |
| 168 | -8.3427 | 1.00000 |
| 169 | -8.2943 | 1.00000 |
| 170 | -8.2731 | 1.00000 |
| 171 | -8.2332 | 1.00000 |
| 172 | -8.2295 | 1.00000 |
| 173 | -8.2275 | 1.00000 |
| 174 | -8.1415 | 1.00000 |
| 175 | -8.1339 | 1.00000 |
| 176 | -8.0743 | 1.00000 |
| 177 | -8.0422 | 1.00000 |
| 178 | -8.0133 | 1.00000 |
| 179 | -8.0071 | 1.00000 |
| 180 | -7.9685 | 1.00000 |
| 181 | -7.9595 | 1.00000 |
| 182 | -7.9204 | 1.00000 |
| 183 | -7.8909 | 1.00000 |
| 184 | -7.8713 | 1.00000 |
| 185 | -7.8635 | 1.00000 |
| 186 | -7.7919 | 1.00000 |
| 187 | -7.7880 | 1.00000 |

|     |         |         |
|-----|---------|---------|
| 188 | -7.7381 | 1.00000 |
| 189 | -7.6790 | 1.00000 |
| 190 | -7.6361 | 1.00000 |
| 191 | -7.5975 | 1.00000 |
| 192 | -7.5769 | 1.00000 |
| 193 | -7.5547 | 1.00000 |
| 194 | -7.5398 | 1.00000 |
| 195 | -7.4725 | 1.00000 |
| 196 | -7.4724 | 1.00000 |
| 197 | -7.4275 | 1.00000 |
| 198 | -7.3235 | 1.00000 |
| 199 | -7.2360 | 1.00000 |
| 200 | -7.1540 | 1.00000 |
| 201 | -7.0556 | 1.00000 |
| 202 | -7.0363 | 1.00000 |
| 203 | -7.0158 | 1.00000 |
| 204 | -6.9854 | 1.00000 |
| 205 | -6.9775 | 1.00000 |
| 206 | -6.9723 | 1.00000 |
| 207 | -6.9410 | 1.00000 |
| 208 | -6.8627 | 1.00000 |
| 209 | -6.8163 | 1.00000 |

|     |         |         |
|-----|---------|---------|
| 210 | -6.7954 | 1.00000 |
| 211 | -6.7879 | 1.00000 |
| 212 | -6.7252 | 1.00000 |
| 213 | -6.6774 | 1.00000 |
| 214 | -6.4676 | 1.00000 |
| 215 | -6.3950 | 1.00000 |
| 216 | -6.3828 | 1.00000 |
| 217 | -6.3784 | 1.00000 |
| 218 | -6.3630 | 1.00000 |
| 219 | -6.3385 | 1.00000 |
| 220 | -6.3034 | 1.00000 |
| 221 | -6.2757 | 1.00000 |
| 222 | -6.2295 | 1.00000 |
| 223 | -6.2281 | 1.00000 |
| 224 | -6.2224 | 1.00000 |
| 225 | -6.0469 | 1.00000 |
| 226 | -6.0090 | 1.00000 |
| 227 | -5.7563 | 1.00000 |
| 228 | -5.7114 | 1.00000 |
| 229 | -5.6922 | 1.00000 |
| 230 | -5.6357 | 1.00000 |
| 231 | -5.6228 | 1.00000 |

|     |         |         |
|-----|---------|---------|
| 232 | -5.5440 | 1.00000 |
| 233 | -5.5233 | 1.00000 |
| 234 | -5.4413 | 1.00000 |
| 235 | -5.4117 | 1.00000 |
| 236 | -5.1435 | 1.00000 |
| 237 | -5.0601 | 1.00000 |
| 238 | -5.0261 | 1.00000 |
| 239 | -5.0224 | 1.00000 |
| 240 | -4.9594 | 1.00000 |
| 241 | -4.8777 | 1.00000 |
| 242 | -4.8543 | 1.00000 |
| 243 | -4.8027 | 1.00000 |
| 244 | -4.7777 | 1.00000 |
| 245 | -4.6507 | 1.00000 |
| 246 | -4.5787 | 1.00000 |
| 247 | -4.5757 | 1.00000 |
| 248 | -4.4756 | 1.00000 |
| 249 | -4.4213 | 1.00000 |
| 250 | -4.3949 | 1.00000 |
| 251 | -4.2966 | 1.00000 |
| 252 | -4.2269 | 1.00000 |
| 253 | -4.1752 | 1.00000 |

|     |         |         |
|-----|---------|---------|
| 254 | -3.5324 | 1.00000 |
| 255 | -3.3091 | 1.00000 |
| 256 | -3.1414 | 1.00000 |
| 257 | -2.9442 | 1.00000 |
| 258 | -2.7992 | 1.00000 |
| 259 | -2.7401 | 1.00000 |
| 260 | -2.0606 | 0.00000 |
| 261 | -1.9145 | 0.00000 |
| 262 | -1.7226 | 0.00000 |
| 263 | -1.6789 | 0.00000 |
| 264 | -1.2917 | 0.00000 |
| 265 | -1.2791 | 0.00000 |
| 266 | -1.1571 | 0.00000 |
| 267 | -0.7232 | 0.00000 |
| 268 | -0.5839 | 0.00000 |
| 269 | -0.5094 | 0.00000 |
| 270 | -0.2807 | 0.00000 |
| 271 | -0.2777 | 0.00000 |
| 272 | -0.2599 | 0.00000 |
| 273 | -0.1564 | 0.00000 |
| 274 | -0.0577 | 0.00000 |
| 275 | -0.0482 | 0.00000 |

|     |        |         |
|-----|--------|---------|
| 276 | 0.0134 | 0.00000 |
| 277 | 0.0401 | 0.00000 |
| 278 | 0.0793 | 0.00000 |
| 279 | 0.2082 | 0.00000 |
| 280 | 0.2556 | 0.00000 |
| 281 | 0.2797 | 0.00000 |
| 282 | 0.4341 | 0.00000 |
| 283 | 0.4520 | 0.00000 |
| 284 | 0.4830 | 0.00000 |
| 285 | 0.6024 | 0.00000 |
| 286 | 0.6951 | 0.00000 |
| 287 | 0.8215 | 0.00000 |
| 288 | 0.8799 | 0.00000 |
| 289 | 1.0559 | 0.00000 |
| 290 | 1.1054 | 0.00000 |
| 291 | 1.1422 | 0.00000 |
| 292 | 1.1770 | 0.00000 |
| 293 | 1.2319 | 0.00000 |
| 294 | 1.2503 | 0.00000 |
| 295 | 1.3088 | 0.00000 |
| 296 | 1.3197 | 0.00000 |
| 297 | 1.3601 | 0.00000 |

|     |        |         |
|-----|--------|---------|
| 298 | 1.4307 | 0.00000 |
| 299 | 1.4785 | 0.00000 |
| 300 | 1.5006 | 0.00000 |
| 301 | 1.5775 | 0.00000 |
| 302 | 1.6029 | 0.00000 |
| 303 | 1.6530 | 0.00000 |
| 304 | 1.6864 | 0.00000 |
| 305 | 1.7582 | 0.00000 |
| 306 | 1.7733 | 0.00000 |
| 307 | 1.8776 | 0.00000 |
| 308 | 1.8999 | 0.00000 |
| 309 | 1.9080 | 0.00000 |
| 310 | 1.9214 | 0.00000 |
| 311 | 2.1394 | 0.00000 |
| 312 | 2.1980 | 0.00000 |
| 313 | 2.2200 | 0.00000 |
| 314 | 2.2536 | 0.00000 |
| 315 | 2.2895 | 0.00000 |
| 316 | 2.2964 | 0.00000 |
| 317 | 2.3369 | 0.00000 |
| 318 | 2.3612 | 0.00000 |
| 319 | 2.3828 | 0.00000 |

|     |        |         |
|-----|--------|---------|
| 320 | 2.4080 | 0.00000 |
| 321 | 2.4285 | 0.00000 |
| 322 | 2.4353 | 0.00000 |
| 323 | 2.4508 | 0.00000 |
| 324 | 2.4582 | 0.00000 |
| 325 | 2.4670 | 0.00000 |
| 326 | 2.5263 | 0.00000 |
| 327 | 2.5441 | 0.00000 |
| 328 | 2.7062 | 0.00000 |
| 329 | 2.7346 | 0.00000 |
| 330 | 2.7532 | 0.00000 |
| 331 | 2.7592 | 0.00000 |
| 332 | 2.7735 | 0.00000 |
| 333 | 2.8290 | 0.00000 |
| 334 | 2.8470 | 0.00000 |
| 335 | 2.8719 | 0.00000 |
| 336 | 2.9023 | 0.00000 |
| 337 | 2.9325 | 0.00000 |
| 338 | 2.9558 | 0.00000 |
| 339 | 2.9837 | 0.00000 |
| 340 | 3.0070 | 0.00000 |
| 341 | 3.0382 | 0.00000 |

|     |        |         |
|-----|--------|---------|
| 342 | 3.0509 | 0.00000 |
| 343 | 3.0719 | 0.00000 |
| 344 | 3.0924 | 0.00000 |
| 345 | 3.1526 | 0.00000 |
| 346 | 3.1710 | 0.00000 |
| 347 | 3.1883 | 0.00000 |
| 348 | 3.1998 | 0.00000 |
| 349 | 3.3069 | 0.00000 |
| 350 | 3.3273 | 0.00000 |
| 351 | 3.3607 | 0.00000 |
| 352 | 3.3708 | 0.00000 |
| 353 | 3.3927 | 0.00000 |
| 354 | 3.4381 | 0.00000 |
| 355 | 3.4816 | 0.00000 |
| 356 | 3.4916 | 0.00000 |
| 357 | 3.4941 | 0.00000 |
| 358 | 3.5048 | 0.00000 |
| 359 | 3.6392 | 0.00000 |
| 360 | 3.6768 | 0.00000 |
| 361 | 3.6994 | 0.00000 |
| 362 | 3.7381 | 0.00000 |
| 363 | 3.7550 | 0.00000 |

|     |        |         |
|-----|--------|---------|
| 364 | 3.7605 | 0.00000 |
| 365 | 3.7773 | 0.00000 |
| 366 | 3.7985 | 0.00000 |
| 367 | 3.8147 | 0.00000 |
| 368 | 3.8410 | 0.00000 |
| 369 | 3.8473 | 0.00000 |
| 370 | 3.8660 | 0.00000 |
| 371 | 3.8803 | 0.00000 |
| 372 | 3.8931 | 0.00000 |
| 373 | 3.9209 | 0.00000 |
| 374 | 3.9357 | 0.00000 |
| 375 | 3.9485 | 0.00000 |
| 376 | 3.9593 | 0.00000 |
| 377 | 3.9827 | 0.00000 |
| 378 | 3.9863 | 0.00000 |
| 379 | 4.0219 | 0.00000 |
| 380 | 4.0782 | 0.00000 |
| 381 | 4.1708 | 0.00000 |
| 382 | 4.2591 | 0.00000 |
| 383 | 4.2621 | 0.00000 |
| 384 | 4.2692 | 0.00000 |
| 385 | 4.2929 | 0.00000 |

|     |        |         |
|-----|--------|---------|
| 386 | 4.3213 | 0.00000 |
| 387 | 4.3343 | 0.00000 |
| 388 | 4.3505 | 0.00000 |
| 389 | 4.3810 | 0.00000 |
| 390 | 4.3858 | 0.00000 |
| 391 | 4.4232 | 0.00000 |
| 392 | 4.4487 | 0.00000 |
| 393 | 4.4740 | 0.00000 |
| 394 | 4.4831 | 0.00000 |
| 395 | 4.4927 | 0.00000 |
| 396 | 4.4993 | 0.00000 |
| 397 | 4.5207 | 0.00000 |
| 398 | 4.5552 | 0.00000 |
| 399 | 4.5936 | 0.00000 |
| 400 | 4.6107 | 0.00000 |
| 401 | 4.6290 | 0.00000 |
| 402 | 4.6462 | 0.00000 |
| 403 | 4.6598 | 0.00000 |
| 404 | 4.6854 | 0.00000 |
| 405 | 4.7087 | 0.00000 |
| 406 | 4.7373 | 0.00000 |
| 407 | 4.7514 | 0.00000 |

|     |        |         |
|-----|--------|---------|
| 408 | 4.7704 | 0.00000 |
| 409 | 4.7867 | 0.00000 |
| 410 | 4.7892 | 0.00000 |
| 411 | 4.8029 | 0.00000 |
| 412 | 4.8331 | 0.00000 |
| 413 | 4.8682 | 0.00000 |
| 414 | 4.8849 | 0.00000 |
| 415 | 4.9030 | 0.00000 |
| 416 | 4.9420 | 0.00000 |
| 417 | 4.9934 | 0.00000 |
| 418 | 5.0099 | 0.00000 |
| 419 | 5.0135 | 0.00000 |
| 420 | 5.0388 | 0.00000 |
| 421 | 5.0445 | 0.00000 |
| 422 | 5.0690 | 0.00000 |
| 423 | 5.0860 | 0.00000 |
| 424 | 5.1177 | 0.00000 |
| 425 | 5.1217 | 0.00000 |
| 426 | 5.1411 | 0.00000 |
| 427 | 5.1441 | 0.00000 |
| 428 | 5.1703 | 0.00000 |
| 429 | 5.1799 | 0.00000 |

|     |        |         |
|-----|--------|---------|
| 430 | 5.1889 | 0.00000 |
| 431 | 5.1930 | 0.00000 |
| 432 | 5.2207 | 0.00000 |
| 433 | 5.2380 | 0.00000 |
| 434 | 5.2444 | 0.00000 |
| 435 | 5.2617 | 0.00000 |
| 436 | 5.3004 | 0.00000 |
| 437 | 5.3034 | 0.00000 |
| 438 | 5.3124 | 0.00000 |
| 439 | 5.3369 | 0.00000 |
| 440 | 5.3536 | 0.00000 |
| 441 | 5.3713 | 0.00000 |
| 442 | 5.3817 | 0.00000 |
| 443 | 5.3962 | 0.00000 |
| 444 | 5.4302 | 0.00000 |
| 445 | 5.4614 | 0.00000 |
| 446 | 5.4722 | 0.00000 |
| 447 | 5.4890 | 0.00000 |
| 448 | 5.5006 | 0.00000 |
| 449 | 5.5274 | 0.00000 |
| 450 | 5.5708 | 0.00000 |
| 451 | 5.5771 | 0.00000 |

|     |        |         |
|-----|--------|---------|
| 452 | 5.5987 | 0.00000 |
| 453 | 5.6098 | 0.00000 |
| 454 | 5.6273 | 0.00000 |
| 455 | 5.6747 | 0.00000 |
| 456 | 5.6984 | 0.00000 |
| 457 | 5.7285 | 0.00000 |
| 458 | 5.7393 | 0.00000 |
| 459 | 5.7573 | 0.00000 |
| 460 | 5.7771 | 0.00000 |
| 461 | 5.7988 | 0.00000 |
| 462 | 5.8024 | 0.00000 |
| 463 | 5.8133 | 0.00000 |
| 464 | 5.8283 | 0.00000 |
| 465 | 5.8353 | 0.00000 |
| 466 | 5.8528 | 0.00000 |
| 467 | 5.8814 | 0.00000 |
| 468 | 5.8880 | 0.00000 |
| 469 | 5.9013 | 0.00000 |
| 470 | 5.9084 | 0.00000 |
| 471 | 5.9176 | 0.00000 |
| 472 | 5.9384 | 0.00000 |
| 473 | 5.9598 | 0.00000 |

|     |        |         |
|-----|--------|---------|
| 474 | 5.9662 | 0.00000 |
| 475 | 5.9969 | 0.00000 |
| 476 | 6.0289 | 0.00000 |
| 477 | 6.0602 | 0.00000 |
| 478 | 6.1350 | 0.00000 |
| 479 | 6.1710 | 0.00000 |
| 480 | 6.2339 | 0.00000 |

-----

soft charge-density along one line, spin component

1

0 1 2 3 4 5 6 7

8 9

total charge-density along one line

soft charge-density along one line, spin component

2

0 1 2 3 4 5 6 7

8 9

total charge-density along one line

pseudopotential strength for first ion, spin component: 1

-2.331 -4.014 -0.002 0.000 0.000

-4.014 -6.828 -0.006 0.000 -0.000

-0.002 -0.006 -0.336 -0.000 0.000

0.000 0.000 -0.000 -0.341 -0.000

0.000 -0.000 0.000 -0.000 -0.341

pseudopotential strength for first ion, spin component: 2

-2.331 -4.014 -0.002 0.000 0.000

-4.014 -6.828 -0.006 0.000 -0.000

-0.002 -0.006 -0.336 -0.000 0.000

0.000 0.000 -0.000 -0.341 -0.000

0.000 -0.000 0.000 -0.000 -0.341

total augmentation occupancy for first ion, spin component: 1

3.579 -0.646 0.444 -0.034 -0.000

-0.646 0.130 -0.082 0.006 0.000

0.444 -0.082 0.056 -0.003 -0.000

-0.034 0.006 -0.003 0.011 0.000

-0.000 0.000 -0.000 0.000 0.007

total augmentation occupancy for first ion, spin component: 2

-0.000 0.000 -0.000 0.000 0.000

0.000 -0.000 0.000 -0.000 -0.000

-0.000 0.000 -0.000 -0.000 -0.000

0.000 -0.000 -0.000 -0.000 -0.000

0.000 -0.000 -0.000 -0.000 -0.000

----- aborting loop because EDIFF is reached -----

total charge

| # of ion | s     | p     | d     | tot   |
|----------|-------|-------|-------|-------|
| 1        | 0.646 | 0.043 | 0.000 | 0.690 |
| 2        | 0.646 | 0.043 | 0.000 | 0.690 |
| 3        | 0.646 | 0.043 | 0.000 | 0.690 |
| 4        | 0.646 | 0.043 | 0.000 | 0.690 |
| 5        | 0.646 | 0.043 | 0.000 | 0.690 |
| 6        | 0.646 | 0.043 | 0.000 | 0.690 |
| 7        | 0.646 | 0.043 | 0.000 | 0.690 |
| 8        | 0.646 | 0.043 | 0.000 | 0.690 |

|    |       |       |       |       |
|----|-------|-------|-------|-------|
| 9  | 0.646 | 0.043 | 0.000 | 0.690 |
| 10 | 0.646 | 0.043 | 0.000 | 0.690 |
| 11 | 0.646 | 0.043 | 0.000 | 0.690 |
| 12 | 0.646 | 0.043 | 0.000 | 0.690 |
| 13 | 0.646 | 0.043 | 0.000 | 0.689 |
| 14 | 0.646 | 0.043 | 0.000 | 0.689 |
| 15 | 0.648 | 0.045 | 0.000 | 0.693 |
| 16 | 0.646 | 0.043 | 0.000 | 0.689 |
| 17 | 0.646 | 0.043 | 0.000 | 0.689 |
| 18 | 0.646 | 0.043 | 0.000 | 0.689 |
| 19 | 0.646 | 0.043 | 0.000 | 0.689 |
| 20 | 0.646 | 0.043 | 0.000 | 0.689 |
| 21 | 0.646 | 0.043 | 0.000 | 0.689 |
| 22 | 0.646 | 0.044 | 0.000 | 0.690 |
| 23 | 0.541 | 0.015 | 0.000 | 0.557 |
| 24 | 0.541 | 0.015 | 0.000 | 0.556 |
| 25 | 0.870 | 1.763 | 0.000 | 2.633 |
| 26 | 0.867 | 1.785 | 0.000 | 2.653 |
| 27 | 0.867 | 1.786 | 0.000 | 2.653 |
| 28 | 0.870 | 1.762 | 0.000 | 2.632 |
| 29 | 0.865 | 1.783 | 0.000 | 2.648 |
| 30 | 0.870 | 1.763 | 0.000 | 2.633 |

|    |       |       |       |       |
|----|-------|-------|-------|-------|
| 31 | 0.867 | 1.786 | 0.000 | 2.653 |
| 32 | 0.867 | 1.786 | 0.000 | 2.653 |
| 33 | 0.870 | 1.762 | 0.000 | 2.632 |
| 34 | 0.865 | 1.783 | 0.000 | 2.648 |
| 35 | 0.870 | 1.763 | 0.000 | 2.633 |
| 36 | 0.868 | 1.787 | 0.000 | 2.654 |
| 37 | 0.867 | 1.786 | 0.000 | 2.653 |
| 38 | 0.870 | 1.763 | 0.000 | 2.633 |
| 39 | 0.865 | 1.784 | 0.000 | 2.649 |
| 40 | 0.870 | 1.763 | 0.000 | 2.633 |
| 41 | 0.868 | 1.787 | 0.000 | 2.655 |
| 42 | 0.867 | 1.786 | 0.000 | 2.653 |
| 43 | 0.871 | 1.764 | 0.000 | 2.634 |
| 44 | 0.865 | 1.783 | 0.000 | 2.648 |
| 45 | 0.870 | 1.763 | 0.000 | 2.633 |
| 46 | 0.867 | 1.786 | 0.000 | 2.653 |
| 47 | 0.867 | 1.786 | 0.000 | 2.653 |
| 48 | 0.871 | 1.763 | 0.000 | 2.634 |
| 49 | 0.865 | 1.783 | 0.000 | 2.648 |
| 50 | 0.870 | 1.763 | 0.000 | 2.633 |
| 51 | 0.867 | 1.786 | 0.000 | 2.653 |
| 52 | 0.867 | 1.786 | 0.000 | 2.653 |

|    |       |       |       |       |
|----|-------|-------|-------|-------|
| 53 | 0.870 | 1.762 | 0.000 | 2.632 |
| 54 | 0.865 | 1.784 | 0.000 | 2.648 |
| 55 | 0.865 | 1.784 | 0.000 | 2.649 |
| 56 | 0.865 | 1.786 | 0.000 | 2.651 |
| 57 | 0.866 | 1.787 | 0.000 | 2.653 |
| 58 | 0.866 | 1.790 | 0.000 | 2.656 |
| 59 | 0.865 | 1.786 | 0.000 | 2.651 |
| 60 | 0.866 | 1.786 | 0.000 | 2.651 |
| 61 | 0.866 | 1.788 | 0.000 | 2.654 |
| 62 | 0.867 | 1.791 | 0.000 | 2.658 |
| 63 | 0.865 | 1.784 | 0.000 | 2.649 |
| 64 | 0.865 | 1.786 | 0.000 | 2.651 |
| 65 | 0.866 | 1.787 | 0.000 | 2.652 |
| 66 | 0.865 | 1.788 | 0.000 | 2.653 |
| 67 | 0.865 | 1.786 | 0.000 | 2.651 |
| 68 | 0.866 | 1.785 | 0.000 | 2.651 |
| 69 | 0.865 | 1.787 | 0.000 | 2.652 |
| 70 | 0.866 | 1.787 | 0.000 | 2.653 |
| 71 | 0.865 | 1.784 | 0.000 | 2.649 |
| 72 | 0.865 | 1.786 | 0.000 | 2.651 |
| 73 | 0.866 | 1.786 | 0.000 | 2.652 |
| 74 | 0.864 | 1.785 | 0.000 | 2.649 |

|    |       |       |       |       |
|----|-------|-------|-------|-------|
| 75 | 0.865 | 1.786 | 0.000 | 2.651 |
| 76 | 0.866 | 1.786 | 0.000 | 2.651 |
| 77 | 0.865 | 1.786 | 0.000 | 2.651 |
| 78 | 0.865 | 1.784 | 0.000 | 2.649 |
| 79 | 0.865 | 1.784 | 0.000 | 2.649 |
| 80 | 0.865 | 1.786 | 0.000 | 2.651 |
| 81 | 0.865 | 1.785 | 0.000 | 2.650 |
| 82 | 0.863 | 1.782 | 0.000 | 2.645 |
| 83 | 0.865 | 1.786 | 0.000 | 2.651 |
| 84 | 0.866 | 1.786 | 0.000 | 2.651 |
| 85 | 0.865 | 1.784 | 0.000 | 2.648 |
| 86 | 0.862 | 1.774 | 0.000 | 2.636 |
| 87 | 0.865 | 1.784 | 0.000 | 2.649 |
| 88 | 0.865 | 1.787 | 0.000 | 2.652 |
| 89 | 0.865 | 1.785 | 0.000 | 2.650 |
| 90 | 0.865 | 1.788 | 0.000 | 2.653 |
| 91 | 0.865 | 1.786 | 0.000 | 2.651 |
| 92 | 0.866 | 1.786 | 0.000 | 2.651 |
| 93 | 0.864 | 1.783 | 0.000 | 2.647 |
| 94 | 0.866 | 1.785 | 0.000 | 2.651 |
| 95 | 0.865 | 1.784 | 0.000 | 2.649 |
| 96 | 0.865 | 1.786 | 0.000 | 2.651 |

|     |       |       |       |       |
|-----|-------|-------|-------|-------|
| 97  | 0.866 | 1.787 | 0.000 | 2.653 |
| 98  | 0.866 | 1.789 | 0.000 | 2.655 |
| 99  | 0.865 | 1.786 | 0.000 | 2.651 |
| 100 | 0.866 | 1.786 | 0.000 | 2.651 |
| 101 | 0.865 | 1.787 | 0.000 | 2.652 |
| 102 | 0.867 | 1.790 | 0.000 | 2.657 |
| 103 | 0.865 | 1.786 | 0.000 | 2.651 |
| 104 | 0.867 | 1.785 | 0.000 | 2.653 |
| 105 | 0.866 | 1.786 | 0.000 | 2.652 |
| 106 | 0.870 | 1.778 | 0.000 | 2.648 |
| 107 | 0.869 | 1.765 | 0.000 | 2.635 |
| 108 | 0.865 | 1.783 | 0.000 | 2.648 |
| 109 | 0.869 | 1.789 | 0.000 | 2.658 |
| 110 | 0.865 | 1.786 | 0.000 | 2.651 |
| 111 | 0.867 | 1.785 | 0.000 | 2.653 |
| 112 | 0.867 | 1.789 | 0.000 | 2.655 |
| 113 | 0.871 | 1.782 | 0.000 | 2.653 |
| 114 | 0.869 | 1.765 | 0.000 | 2.634 |
| 115 | 0.865 | 1.783 | 0.000 | 2.648 |
| 116 | 0.870 | 1.791 | 0.000 | 2.661 |
| 117 | 0.865 | 1.786 | 0.000 | 2.651 |
| 118 | 0.867 | 1.786 | 0.000 | 2.653 |

|     |       |       |       |       |
|-----|-------|-------|-------|-------|
| 119 | 0.865 | 1.782 | 0.000 | 2.647 |
| 120 | 0.857 | 1.707 | 0.000 | 2.564 |
| 121 | 0.869 | 1.765 | 0.000 | 2.634 |
| 122 | 0.865 | 1.783 | 0.000 | 2.648 |
| 123 | 0.866 | 1.778 | 0.000 | 2.644 |
| 124 | 0.866 | 1.786 | 0.000 | 2.652 |
| 125 | 0.867 | 1.785 | 0.000 | 2.653 |
| 126 | 0.862 | 1.776 | 0.000 | 2.638 |
| 127 | 0.849 | 1.831 | 0.000 | 2.679 |
| 128 | 0.870 | 1.767 | 0.000 | 2.637 |
| 129 | 0.865 | 1.783 | 0.000 | 2.648 |
| 130 | 0.860 | 1.757 | 0.000 | 2.617 |
| 131 | 0.866 | 1.786 | 0.000 | 2.652 |
| 132 | 0.867 | 1.784 | 0.000 | 2.652 |
| 133 | 0.864 | 1.787 | 0.000 | 2.651 |
| 134 | 0.869 | 1.789 | 0.000 | 2.659 |
| 135 | 0.869 | 1.767 | 0.000 | 2.636 |
| 136 | 0.865 | 1.783 | 0.000 | 2.648 |
| 137 | 0.866 | 1.772 | 0.000 | 2.638 |
| 138 | 0.866 | 1.786 | 0.000 | 2.652 |
| 139 | 0.867 | 1.785 | 0.000 | 2.652 |
| 140 | 0.866 | 1.788 | 0.000 | 2.654 |

|     |       |       |       |       |
|-----|-------|-------|-------|-------|
| 141 | 0.870 | 1.779 | 0.000 | 2.649 |
| 142 | 0.869 | 1.766 | 0.000 | 2.635 |
| 143 | 0.865 | 1.783 | 0.000 | 2.648 |
| 144 | 0.869 | 1.790 | 0.000 | 2.659 |
| 145 | 0.942 | 1.718 | 0.000 | 2.660 |
| 146 | 1.240 | 1.546 | 0.074 | 2.860 |
| 147 | 1.633 | 3.526 | 0.000 | 5.160 |

-----

|     |         |         |       |         |
|-----|---------|---------|-------|---------|
| tot | 123.062 | 221.548 | 0.074 | 344.685 |
|-----|---------|---------|-------|---------|

magnetization (x)

| # of ion | s      | p      | d     | tot    |
|----------|--------|--------|-------|--------|
| 1        | 0.000  | -0.000 | 0.000 | 0.000  |
| 2        | -0.000 | 0.000  | 0.000 | -0.000 |
| 3        | 0.000  | -0.000 | 0.000 | 0.000  |
| 4        | -0.000 | 0.000  | 0.000 | -0.000 |
| 5        | 0.000  | -0.000 | 0.000 | 0.000  |
| 6        | -0.000 | 0.000  | 0.000 | -0.000 |

|    |        |        |       |        |
|----|--------|--------|-------|--------|
| 7  | 0.000  | -0.000 | 0.000 | 0.000  |
| 8  | -0.000 | 0.000  | 0.000 | -0.000 |
| 9  | 0.000  | -0.000 | 0.000 | 0.000  |
| 10 | -0.000 | 0.000  | 0.000 | -0.000 |
| 11 | 0.000  | -0.000 | 0.000 | 0.000  |
| 12 | -0.000 | 0.000  | 0.000 | -0.000 |
| 13 | 0.000  | -0.000 | 0.000 | 0.000  |
| 14 | -0.004 | 0.002  | 0.000 | -0.002 |
| 15 | 0.000  | -0.000 | 0.000 | 0.000  |
| 16 | -0.004 | 0.002  | 0.000 | -0.002 |
| 17 | -0.004 | 0.002  | 0.000 | -0.002 |
| 18 | 0.000  | -0.000 | 0.000 | 0.000  |
| 19 | -0.003 | 0.001  | 0.000 | -0.002 |
| 20 | 0.000  | -0.000 | 0.000 | 0.000  |
| 21 | -0.003 | 0.002  | 0.000 | -0.002 |
| 22 | -0.003 | 0.002  | 0.000 | -0.002 |
| 23 | -0.000 | 0.000  | 0.000 | -0.000 |
| 24 | -0.000 | 0.000  | 0.000 | -0.000 |
| 25 | -0.000 | -0.007 | 0.000 | -0.008 |
| 26 | -0.000 | -0.002 | 0.000 | -0.002 |
| 27 | 0.000  | 0.003  | 0.000 | 0.003  |
| 28 | 0.000  | 0.005  | 0.000 | 0.005  |

|    |        |        |       |        |
|----|--------|--------|-------|--------|
| 29 | 0.000  | 0.003  | 0.000 | 0.003  |
| 30 | -0.000 | -0.007 | 0.000 | -0.008 |
| 31 | -0.000 | -0.002 | 0.000 | -0.002 |
| 32 | 0.000  | 0.003  | 0.000 | 0.003  |
| 33 | 0.000  | 0.005  | 0.000 | 0.005  |
| 34 | 0.000  | 0.002  | 0.000 | 0.002  |
| 35 | -0.000 | -0.007 | 0.000 | -0.008 |
| 36 | -0.000 | -0.002 | 0.000 | -0.002 |
| 37 | 0.000  | 0.003  | 0.000 | 0.003  |
| 38 | 0.000  | 0.006  | 0.000 | 0.007  |
| 39 | 0.000  | 0.002  | 0.000 | 0.002  |
| 40 | -0.000 | -0.007 | 0.000 | -0.008 |
| 41 | -0.000 | -0.002 | 0.000 | -0.002 |
| 42 | 0.000  | 0.002  | 0.000 | 0.003  |
| 43 | 0.000  | 0.005  | 0.000 | 0.006  |
| 44 | 0.000  | 0.004  | 0.000 | 0.004  |
| 45 | -0.000 | -0.007 | 0.000 | -0.008 |
| 46 | -0.000 | -0.002 | 0.000 | -0.002 |
| 47 | 0.000  | 0.003  | 0.000 | 0.003  |
| 48 | 0.000  | 0.005  | 0.000 | 0.006  |
| 49 | 0.000  | 0.001  | 0.000 | 0.002  |
| 50 | -0.000 | -0.007 | 0.000 | -0.008 |

|    |        |        |       |        |
|----|--------|--------|-------|--------|
| 51 | -0.000 | -0.002 | 0.000 | -0.002 |
| 52 | 0.000  | 0.002  | 0.000 | 0.003  |
| 53 | 0.000  | 0.006  | 0.000 | 0.007  |
| 54 | 0.000  | 0.002  | 0.000 | 0.002  |
| 55 | -0.000 | -0.005 | 0.000 | -0.006 |
| 56 | -0.000 | -0.007 | 0.000 | -0.007 |
| 57 | -0.000 | -0.001 | 0.000 | -0.001 |
| 58 | -0.000 | -0.001 | 0.000 | -0.001 |
| 59 | 0.000  | 0.006  | 0.000 | 0.007  |
| 60 | 0.000  | 0.003  | 0.000 | 0.003  |
| 61 | 0.000  | 0.001  | 0.000 | 0.001  |
| 62 | 0.000  | 0.003  | 0.000 | 0.003  |
| 63 | -0.000 | -0.005 | 0.000 | -0.006 |
| 64 | -0.000 | -0.007 | 0.000 | -0.007 |
| 65 | -0.000 | -0.001 | 0.000 | -0.001 |
| 66 | -0.000 | -0.001 | 0.000 | -0.001 |
| 67 | 0.000  | 0.006  | 0.000 | 0.006  |
| 68 | 0.000  | 0.003  | 0.000 | 0.003  |
| 69 | 0.000  | 0.001  | 0.000 | 0.001  |
| 70 | 0.000  | 0.002  | 0.000 | 0.002  |
| 71 | -0.000 | -0.005 | 0.000 | -0.006 |
| 72 | -0.000 | -0.007 | 0.000 | -0.007 |

|    |        |        |       |        |
|----|--------|--------|-------|--------|
| 73 | -0.000 | -0.001 | 0.000 | -0.001 |
| 74 | -0.000 | -0.002 | 0.000 | -0.002 |
| 75 | 0.000  | 0.006  | 0.000 | 0.007  |
| 76 | 0.000  | 0.003  | 0.000 | 0.004  |
| 77 | 0.000  | 0.003  | 0.000 | 0.003  |
| 78 | 0.000  | 0.001  | 0.000 | 0.001  |
| 79 | -0.000 | -0.005 | 0.000 | -0.006 |
| 80 | -0.000 | -0.007 | 0.000 | -0.007 |
| 81 | -0.000 | -0.001 | 0.000 | -0.002 |
| 82 | -0.000 | -0.002 | 0.000 | -0.002 |
| 83 | 0.001  | 0.007  | 0.000 | 0.008  |
| 84 | 0.000  | 0.003  | 0.000 | 0.003  |
| 85 | 0.000  | 0.002  | 0.000 | 0.002  |
| 86 | 0.000  | 0.005  | 0.000 | 0.006  |
| 87 | -0.000 | -0.005 | 0.000 | -0.005 |
| 88 | -0.000 | -0.007 | 0.000 | -0.007 |
| 89 | -0.000 | -0.001 | 0.000 | -0.002 |
| 90 | -0.000 | -0.002 | 0.000 | -0.002 |
| 91 | 0.001  | 0.008  | 0.000 | 0.008  |
| 92 | 0.000  | 0.003  | 0.000 | 0.003  |
| 93 | 0.000  | 0.002  | 0.000 | 0.003  |
| 94 | 0.000  | 0.001  | 0.000 | 0.001  |

|     |        |        |       |        |
|-----|--------|--------|-------|--------|
| 95  | -0.000 | -0.005 | 0.000 | -0.006 |
| 96  | -0.000 | -0.007 | 0.000 | -0.007 |
| 97  | -0.000 | -0.001 | 0.000 | -0.001 |
| 98  | -0.000 | -0.001 | 0.000 | -0.001 |
| 99  | 0.001  | 0.007  | 0.000 | 0.007  |
| 100 | 0.000  | 0.003  | 0.000 | 0.004  |
| 101 | 0.000  | 0.003  | 0.000 | 0.003  |
| 102 | 0.000  | 0.002  | 0.000 | 0.002  |
| 103 | -0.001 | -0.010 | 0.000 | -0.011 |
| 104 | -0.003 | -0.028 | 0.000 | -0.031 |
| 105 | -0.000 | -0.001 | 0.000 | -0.002 |
| 106 | -0.000 | -0.004 | 0.000 | -0.005 |
| 107 | 0.007  | 0.116  | 0.000 | 0.122  |
| 108 | 0.001  | 0.010  | 0.000 | 0.011  |
| 109 | 0.000  | 0.001  | 0.000 | 0.001  |
| 110 | -0.001 | -0.010 | 0.000 | -0.011 |
| 111 | -0.003 | -0.028 | 0.000 | -0.031 |
| 112 | -0.000 | -0.001 | 0.000 | -0.002 |
| 113 | -0.000 | -0.003 | 0.000 | -0.004 |
| 114 | 0.007  | 0.120  | 0.000 | 0.127  |
| 115 | 0.001  | 0.010  | 0.000 | 0.011  |
| 116 | 0.000  | 0.001  | 0.000 | 0.002  |

|     |        |        |       |        |
|-----|--------|--------|-------|--------|
| 117 | -0.001 | -0.010 | 0.000 | -0.011 |
| 118 | -0.003 | -0.026 | 0.000 | -0.029 |
| 119 | -0.000 | -0.002 | 0.000 | -0.002 |
| 120 | -0.000 | -0.002 | 0.000 | -0.002 |
| 121 | 0.007  | 0.115  | 0.000 | 0.122  |
| 122 | 0.001  | 0.010  | 0.000 | 0.010  |
| 123 | 0.000  | 0.003  | 0.000 | 0.003  |
| 124 | -0.001 | -0.010 | 0.000 | -0.011 |
| 125 | -0.003 | -0.024 | 0.000 | -0.027 |
| 126 | -0.000 | -0.002 | 0.000 | -0.002 |
| 127 | -0.000 | 0.001  | 0.000 | 0.001  |
| 128 | 0.006  | 0.105  | 0.000 | 0.111  |
| 129 | 0.001  | 0.009  | 0.000 | 0.010  |
| 130 | 0.000  | 0.004  | 0.000 | 0.004  |
| 131 | -0.001 | -0.009 | 0.000 | -0.010 |
| 132 | -0.003 | -0.024 | 0.000 | -0.027 |
| 133 | -0.000 | -0.002 | 0.000 | -0.002 |
| 134 | -0.000 | -0.002 | 0.000 | -0.002 |
| 135 | 0.006  | 0.097  | 0.000 | 0.102  |
| 136 | 0.001  | 0.009  | 0.000 | 0.010  |
| 137 | 0.000  | 0.004  | 0.000 | 0.005  |
| 138 | -0.001 | -0.010 | 0.000 | -0.011 |

|     |        |        |        |        |
|-----|--------|--------|--------|--------|
| 139 | -0.003 | -0.026 | 0.000  | -0.029 |
| 140 | -0.000 | -0.002 | 0.000  | -0.002 |
| 141 | -0.000 | -0.003 | 0.000  | -0.004 |
| 142 | 0.006  | 0.105  | 0.000  | 0.111  |
| 143 | 0.001  | 0.010  | 0.000  | 0.010  |
| 144 | 0.000  | 0.002  | 0.000  | 0.003  |
| 145 | 0.000  | 0.005  | 0.000  | 0.006  |
| 146 | -0.000 | 0.000  | -0.000 | 0.000  |
| 147 | 0.000  | 0.004  | 0.000  | 0.004  |

-----

|     |       |       |        |       |
|-----|-------|-------|--------|-------|
| tot | 0.001 | 0.513 | -0.000 | 0.514 |
|-----|-------|-------|--------|-------|

|         |          |         |           |        |
|---------|----------|---------|-----------|--------|
| CHARGE: | cpu time | 0.5204: | real time | 0.5220 |
| FORLOC: | cpu time | 0.0200: | real time | 0.0200 |
| FORNL : | cpu time | 2.0683: | real time | 2.0775 |
| STRESS: | cpu time | 6.2217: | real time | 6.2496 |
| FORCOR: | cpu time | 0.1434: | real time | 0.1450 |
| FORHAR: | cpu time | 0.0336: | real time | 0.0339 |
| MIXING: | cpu time | 0.0168: | real time | 0.0168 |
| OFIELD: | cpu time | 0.0002: | real time | 0.0003 |

-----

DFTD3 V3.0 Rev 1

IVDW = 11

DF pbe

parameters

VDW\_S6 = 1.0000

VDW\_S8 = 0.7220

VDW\_SR = 1.2170

rs18 = 1.0000

alpha6 = 14.0000

alpha8 = 16.0000

k1-k3 = 16.0000 1.3333 -4.0000

VDW\_RADIUS = 50.2022 A

VDW\_CNRADIUS = 21.1671 A

Edisp (eV) -6.61779

E6 (eV): -3.9313

E8 (eV): -2.6865

% E8 : 40.60

FORVDW: cpu time 1.8720: real time 1.8918

FORCE on cell =-STRESS in cart. coord. units (eV):

| Direction | XX | YY | ZZ | XY | YZ | ZX |
|-----------|----|----|----|----|----|----|
|-----------|----|----|----|----|----|----|

```

-----
Alpha Z   233.50077   233.50077   233.50077
Ewald    107579.64891 23477.03964-39727.58845   9.73164  3454.91959   128.50515
Hartree 106097.76185 25032.59879-23794.45641  -6.72712  2947.16346   93.19169
E(xc)   -1914.23720 -1916.58834 -1979.89772   0.13187   1.82225   0.13010
Local   *****-53958.07596 57015.85839   0.37222 -6360.09120  -218.27525
n-local  -472.65371  -482.46815  -439.54636  -0.68033  -0.70340  -0.31833
augment  -38.28645   -38.59098   -34.30755   0.00971  -0.98085   0.00029
Kinetic  7635.15424   7638.79437   8713.97763  -3.08733  -41.59850  -3.19058
Fock      0.00000     0.00000     0.00000     0.00000   0.00000   0.00000
vdW       -2.64198   -1.49213   -6.59312   0.00139  -0.07446   0.01168

```

```

-----
Total     -17.74331   -15.28199   -19.05281   -0.24794   0.45689   0.05475
in kB     -4.89282    -4.21409    -5.25392    -0.06837   0.12599   0.01510
external pressure =      -4.79 kB  Pullay stress =      0.00 kB

```

VOLUME and BASIS-vectors are now :

```

-----
energy-cutoff :      400.00
volume of cell :      5810.14

```

direct lattice vectors

reciprocal lattice vectors

|              |              |              |             |             |             |
|--------------|--------------|--------------|-------------|-------------|-------------|
| 14.780600000 | 0.000000000  | 0.000000000  | 0.067656252 | 0.000000000 | 0.000000000 |
| 0.000000000  | 21.333900000 | 0.000000000  | 0.000000000 | 0.046873755 | 0.000000000 |
| 0.000000000  | 0.000000000  | 18.425700000 | 0.000000000 | 0.000000000 | 0.054272022 |

length of vectors

|              |              |              |             |             |             |
|--------------|--------------|--------------|-------------|-------------|-------------|
| 14.780600000 | 21.333900000 | 18.425700000 | 0.067656252 | 0.046873755 | 0.054272022 |
|--------------|--------------|--------------|-------------|-------------|-------------|

FORCES acting on ions

electron-ion (+dipol)

ewald-force

non-local-force

convergence-correction

-----

|           |           |           |           |           |           |           |           |   |
|-----------|-----------|-----------|-----------|-----------|-----------|-----------|-----------|---|
| 0.460E-02 | 0.154E+03 | 0.361E+02 | -.310E-02 | -.160E+03 | -.357E+02 | -.180E-02 | 0.566E+01 | - |
| .438E+00  | -.551E-07 | -.125E-05 | 0.762E-06 |           |           |           |           |   |
| -.185E-01 | 0.155E+03 | -.340E+02 | 0.161E-01 | -.160E+03 | 0.335E+02 | 0.115E-02 | 0.565E+01 |   |
| 0.541E+00 | -.873E-08 | -.122E-05 | -.242E-06 |           |           |           |           |   |
| 0.184E+00 | 0.154E+03 | 0.360E+02 | -.184E+00 | -.160E+03 | -.356E+02 | 0.832E-05 | 0.565E+01 | - |
| .443E+00  | -.246E-06 | -.116E-05 | 0.849E-06 |           |           |           |           |   |
| 0.112E+00 | 0.155E+03 | -.341E+02 | -.988E-01 | -.160E+03 | 0.336E+02 | -.175E-01 | 0.565E+01 |   |
| 0.535E+00 | -.141E-06 | -.130E-05 | -.250E-06 |           |           |           |           |   |
| 0.171E+00 | 0.154E+03 | 0.362E+02 | -.173E+00 | -.160E+03 | -.357E+02 | 0.116E-02 | 0.566E+01 | - |

.440E+00    -.215E-06 -.103E-05 0.882E-06  
0.126E+00 0.154E+03 -.340E+02    -.108E+00 -.160E+03 0.334E+02    -.211E-01 0.565E+01  
0.541E+00    -.116E-06 -.145E-05 -.121E-06  
-.193E-01 0.154E+03 0.363E+02    0.181E-01 -.160E+03 -.359E+02    0.159E-02 0.566E+01 -  
.431E+00    -.299E-07 -.966E-06 0.876E-06  
-.129E-01 0.154E+03 -.338E+02    0.197E-01 -.160E+03 0.332E+02    -.720E-02 0.565E+01  
0.555E+00    0.984E-08 -.127E-05 -.560E-08  
-.182E+00 0.154E+03 0.363E+02    0.182E+00 -.160E+03 -.359E+02    0.255E-03 0.566E+01 -  
.429E+00    0.248E-06 -.101E-05 0.794E-06  
-.128E+00 0.155E+03 -.337E+02    0.115E+00 -.160E+03 0.331E+02    0.109E-01 0.565E+01  
0.561E+00    0.113E-06 -.123E-05 -.515E-08  
-.174E+00 0.154E+03 0.362E+02    0.176E+00 -.160E+03 -.358E+02    -.177E-02 0.566E+01 -  
.432E+00    0.296E-06 -.114E-05 0.704E-06  
-.115E+00 0.155E+03 -.338E+02    0.958E-01 -.160E+03 0.332E+02    0.192E-01 0.565E+01  
0.555E+00    0.151E-06 -.133E-05 -.125E-06  
0.228E+01 -.150E+03 -.386E+02    -.227E+01 0.156E+03 0.386E+02    -.103E-01 -.566E+01  
0.767E-01    -.148E-06 0.129E-05 0.217E-07  
-.416E+00 -.151E+03 0.388E+02    0.417E+00 0.157E+03 -.386E+02    -.129E-02 -.567E+01 -  
.269E+00    -.719E-07 0.878E-06 0.952E-07  
0.136E+02 -.146E+03 -.413E+02    -.138E+02 0.151E+03 0.413E+02    0.257E+00 -.567E+01 -  
.348E-01    -.418E-06 0.965E-06 0.569E-07  
0.162E+01 -.151E+03 0.402E+02    -.162E+01 0.156E+03 -.400E+02    -.100E-02 -.567E+01 -

.229E+00    -.185E-07 0.874E-06 0.870E-07  
0.352E+01 -.149E+03 0.443E+02    -.352E+01 0.155E+03 -.441E+02    -.199E-02 -.567E+01 -  
.180E+00    -.254E-07 0.837E-06 -.180E-06  
-.148E+02 -.146E+03 -.330E+02    0.149E+02 0.151E+03 0.329E+02    -.958E-01 -.566E+01  
0.487E-01    0.479E-06 0.118E-05 -.204E-06  
-.297E+01 -.149E+03 0.432E+02    0.296E+01 0.155E+03 -.430E+02    0.115E-01 -.567E+01 -  
.241E+00    0.846E-07 0.964E-06 -.502E-06  
-.379E+01 -.150E+03 -.385E+02    0.379E+01 0.156E+03 0.385E+02    -.620E-02 -.566E+01  
0.240E-01    0.128E-06 0.129E-05 -.479E-07  
-.207E+01 -.151E+03 0.395E+02    0.207E+01 0.156E+03 -.392E+02    0.151E-02 -.566E+01 -  
.282E+00    -.733E-07 0.986E-06 -.224E-06  
0.162E-02 -.148E+03 0.486E+02    0.601E-02 0.154E+03 -.484E+02    -.554E-02 -.569E+01 -  
.158E+00    0.122E-06 0.850E-06 -.476E-06  
0.196E+02 -.103E+03 0.222E+02    -.212E+02 0.103E+03 -.246E+02    0.153E+01 0.138E+00  
0.238E+01    -.285E-06 0.477E-06 -.470E-06  
-.192E+02 -.103E+03 0.153E+02    0.216E+02 0.103E+03 -.168E+02    -.241E+01 -.119E+00  
0.152E+01    0.650E-07 0.459E-06 -.714E-06  
0.713E-01 0.461E+03 0.202E+03    -.745E-01 -.462E+03 -.201E+03    0.383E-02 0.102E+01 -  
.219E+00    -.250E-06 -.231E-05 0.328E-05  
0.212E+00 0.353E+03 -.234E+03    -.212E+00 -.353E+03 0.234E+03    0.260E-02 0.443E+00 -  
.370E-01    -.322E-06 -.230E-05 -.237E-05  
-.249E-01 0.351E+03 0.240E+03    0.235E-01 -.351E+03 -.241E+03    0.315E-02 0.408E+00

0.564E-01 0.173E-06 -.765E-06 0.347E-05  
-.173E+00 0.462E+03 -.195E+03 0.180E+00 -.463E+03 0.195E+03 -.664E-02 0.105E+01  
0.233E+00 -.245E-06 -.317E-05 -.166E-05  
-.622E-01 0.210E+03 -.272E+03 0.663E-01 -.210E+03 0.272E+03 -.448E-02 0.936E-01  
0.560E-01 -.196E-06 -.185E-06 -.316E-05  
0.562E+00 0.461E+03 0.202E+03 -.565E+00 -.462E+03 -.201E+03 0.202E-02 0.102E+01 -  
.214E+00 -.687E-06 -.168E-05 0.358E-05  
0.106E+01 0.352E+03 -.234E+03 -.107E+01 -.353E+03 0.234E+03 0.160E-01 0.448E+00 -  
.425E-01 -.341E-06 -.109E-05 -.212E-05  
0.413E+00 0.351E+03 0.240E+03 -.415E+00 -.351E+03 -.240E+03 0.302E-02 0.408E+00  
0.491E-01 -.179E-06 -.571E-06 0.372E-05  
0.578E+00 0.462E+03 -.195E+03 -.583E+00 -.463E+03 0.195E+03 0.479E-02 0.105E+01  
0.235E+00 -.166E-06 -.283E-05 -.175E-05  
0.689E+00 0.210E+03 -.272E+03 -.695E+00 -.210E+03 0.272E+03 0.603E-02 0.912E-01  
0.616E-01 0.102E-06 -.155E-05 -.321E-05  
0.426E+00 0.461E+03 0.202E+03 -.428E+00 -.462E+03 -.202E+03 0.385E-02 0.102E+01 -  
.214E+00 -.560E-06 -.106E-05 0.368E-05  
0.939E+00 0.352E+03 -.233E+03 -.955E+00 -.352E+03 0.233E+03 0.151E-01 0.441E+00 -  
.377E-01 -.391E-07 -.756E-06 -.175E-05  
0.478E+00 0.351E+03 0.241E+03 -.480E+00 -.351E+03 -.241E+03 0.250E-02 0.406E+00  
0.512E-01 -.553E-06 -.210E-06 0.394E-05  
0.705E+00 0.462E+03 -.194E+03 -.715E+00 -.463E+03 0.194E+03 0.786E-02 0.106E+01

0.242E+00 - .431E-06 -.178E-05 -.122E-05  
0.725E+00 0.210E+03 -.271E+03 -.734E+00 -.210E+03 0.271E+03 0.654E-02 0.911E-01  
0.592E-01 -.168E-06 -.128E-05 -.300E-05  
-.181E+00 0.461E+03 0.202E+03 0.178E+00 -.462E+03 -.202E+03 0.449E-02 0.102E+01 -  
.218E+00 0.891E-08 -.507E-06 0.369E-05  
-.294E+00 0.352E+03 -.233E+03 0.298E+00 -.352E+03 0.233E+03 -.207E-02 0.440E+00 -  
.299E-01 0.974E-07 -.176E-05 -.173E-05  
0.404E-01 0.351E+03 0.241E+03 -.394E-01 -.351E+03 -.241E+03 0.223E-02 0.409E+00  
0.557E-01 -.293E-06 0.329E-06 0.401E-05  
0.502E-01 0.462E+03 -.194E+03 -.564E-01 -.463E+03 0.194E+03 0.397E-02 0.106E+01  
0.232E+00 -.865E-07 -.231E-05 -.102E-05  
-.478E-01 0.210E+03 -.271E+03 0.458E-01 -.210E+03 0.271E+03 -.245E-03 0.933E-01  
0.324E-01 0.327E-07 0.113E-06 -.283E-05  
-.552E+00 0.461E+03 0.202E+03 0.550E+00 -.462E+03 -.202E+03 0.767E-03 0.102E+01 -  
.220E+00 0.594E-06 -.831E-06 0.346E-05  
-.119E+01 0.352E+03 -.233E+03 0.120E+01 -.353E+03 0.233E+03 -.162E-01 0.447E+00 -  
.330E-01 0.297E-06 -.106E-05 -.175E-05  
-.352E+00 0.351E+03 0.241E+03 0.349E+00 -.351E+03 -.241E+03 0.206E-02 0.413E+00  
0.624E-01 0.241E-06 0.665E-06 0.389E-05  
-.412E+00 0.462E+03 -.194E+03 0.425E+00 -.463E+03 0.194E+03 -.115E-01 0.106E+01  
0.230E+00 0.709E-06 -.243E-05 -.988E-06  
-.561E+00 0.210E+03 -.271E+03 0.565E+00 -.210E+03 0.271E+03 -.942E-02 0.915E-01

0.525E-01 0.292E-06 -.174E-05 -.297E-05  
-.475E+00 0.461E+03 0.202E+03 0.474E+00 -.462E+03 -.202E+03 0.306E-02 0.102E+01 -  
.220E+00 0.925E-06 -.194E-05 0.310E-05  
-.805E+00 0.353E+03 -.234E+03 0.820E+00 -.353E+03 0.234E+03 -.149E-01 0.447E+00 -  
.393E-01 0.273E-06 -.165E-05 -.211E-05  
-.374E+00 0.351E+03 0.241E+03 0.368E+00 -.351E+03 -.241E+03 0.960E-03 0.411E+00  
0.626E-01 0.572E-06 -.891E-07 0.359E-05  
-.594E+00 0.462E+03 -.194E+03 0.607E+00 -.463E+03 0.194E+03 -.170E-01 0.105E+01  
0.234E+00 0.276E-06 -.225E-05 -.117E-05  
-.588E+00 0.210E+03 -.272E+03 0.599E+00 -.210E+03 0.272E+03 -.102E-01 0.992E-01  
0.566E-01 -.366E-07 -.154E-05 -.316E-05  
-.881E-02 0.206E+03 0.279E+03 0.122E-01 -.206E+03 -.279E+03 -.361E-02 0.687E-01 -  
.412E-01 0.931E-07 -.758E-06 0.403E-05  
0.668E+00 0.303E+02 0.296E+03 -.663E+00 -.302E+02 -.296E+03 -.468E-02 -.410E-01  
0.752E-02 -.149E-06 0.604E-06 0.403E-05  
-.846E+00 0.144E+03 -.282E+03 0.848E+00 -.144E+03 0.282E+03 -.318E-02 0.137E+00  
0.286E-01 0.410E-06 0.493E-06 -.336E-05  
0.534E+00 -.215E+02 -.285E+03 -.534E+00 0.214E+02 0.285E+03 -.786E-03 0.387E-01  
0.186E-01 -.584E-07 0.795E-06 -.325E-05  
0.499E+00 -.294E+02 0.293E+03 -.496E+00 0.294E+02 -.293E+03 -.553E-02 0.254E-01 -  
.303E-01 -.177E-07 0.498E-06 0.373E-05  
0.524E+00 0.139E+03 0.289E+03 -.524E+00 -.139E+03 -.289E+03 0.178E-02 0.104E+00 -

.248E-01    -.118E-06 -.335E-06 0.419E-05  
              -.127E+01 0.364E+02 -.287E+03    0.126E+01 -.364E+02 0.287E+03    -.473E-04 -.755E-02  
0.138E-01    0.481E-06 0.791E-06 -.339E-05  
              0.167E+01 -.130E+03 -.271E+03    -.169E+01 0.130E+03 0.271E+03    0.106E-01 -.879E-01  
0.372E-01    -.823E-07 0.230E-05 -.248E-05  
              0.397E+00 0.207E+03 0.280E+03    -.395E+00 -.207E+03 -.280E+03    0.708E-03 0.695E-01 -  
.370E-01    -.206E-06 -.858E-06 0.415E-05  
              0.919E+00 0.312E+02 0.296E+03    -.923E+00 -.311E+02 -.296E+03    0.225E-02 -.410E-01  
0.122E-01    0.155E-07 0.611E-06 0.425E-05  
              0.133E+01 0.144E+03 -.282E+03    -.133E+01 -.144E+03 0.282E+03    0.500E-02 0.126E+00  
0.279E-01    -.553E-06 0.508E-06 -.340E-05  
              0.342E+01 -.199E+02 -.285E+03    -.343E+01 0.199E+02 0.285E+03    0.135E-01 0.414E-01  
0.136E-01    -.212E-06 0.171E-05 -.333E-05  
              0.139E+01 -.287E+02 0.294E+03    -.139E+01 0.287E+02 -.294E+03    -.348E-02 0.253E-01 -  
.307E-01    -.274E-06 0.661E-06 0.401E-05  
              0.678E+00 0.139E+03 0.290E+03    -.678E+00 -.139E+03 -.290E+03    0.617E-03 0.103E+00 -  
.295E-01    -.525E-07 -.376E-06 0.439E-05  
              0.160E+01 0.367E+02 -.287E+03    -.159E+01 -.367E+02 0.287E+03    -.128E-01 -.205E-01  
0.128E-01    -.501E-06 0.989E-06 -.341E-05  
              0.611E+01 -.125E+03 -.271E+03    -.613E+01 0.125E+03 0.271E+03    0.219E-01 -.894E-01  
0.147E-01    0.196E-06 0.781E-06 -.276E-05  
              0.367E+00 0.207E+03 0.280E+03    -.372E+00 -.207E+03 -.280E+03    0.106E-03 0.684E-01 -

.365E-01    -.290E-06 -.304E-06 0.441E-05  
              -.379E-01 0.319E+02 0.296E+03    0.293E-01 -.318E+02 -.296E+03    0.106E-01 -.362E-01  
0.139E-01    -.853E-07 0.512E-06 0.427E-05  
              0.210E+01 0.144E+03 -.281E+03    -.211E+01 -.144E+03 0.281E+03    0.121E-01 0.120E+00  
0.240E-01    0.457E-07 -.744E-06 -.336E-05  
              0.303E+01 -.172E+02 -.283E+03    -.306E+01 0.171E+02 0.283E+03    0.244E-01 0.871E-01  
0.608E-01    -.101E-05 0.125E-05 -.361E-05  
              0.106E+01 -.272E+02 0.294E+03    -.105E+01 0.272E+02 -.294E+03    0.288E-02 0.243E-01 -  
.376E-01    0.432E-07 0.426E-06 0.407E-05  
              0.963E-01 0.140E+03 0.290E+03    -.979E-01 -.140E+03 -.290E+03    0.130E-02 0.107E+00 -  
.232E-01    -.169E-06 0.187E-06 0.454E-05  
              0.277E+01 0.387E+02 -.286E+03    -.277E+01 -.387E+02 0.286E+03    0.117E-02 -.108E-01  
0.292E-01    0.589E-07 0.185E-05 -.347E-05  
              0.595E+01 -.115E+03 -.267E+03    -.611E+01 0.115E+03 0.267E+03    0.154E+00 0.150E-02  
0.130E+00    -.105E-05 0.338E-06 -.310E-05  
              -.242E+00 0.207E+03 0.280E+03    0.240E+00 -.207E+03 -.280E+03    0.438E-02 0.717E-01 -  
.387E-01    0.465E-07 -.835E-07 0.449E-05  
              -.115E+01 0.314E+02 0.294E+03    0.114E+01 -.314E+02 -.294E+03    0.918E-02 -.311E-01  
0.544E-02    0.241E-06 0.935E-06 0.413E-05  
              0.594E+00 0.144E+03 -.281E+03    -.612E+00 -.144E+03 0.281E+03    0.178E-01 0.126E+00  
0.437E-01    0.409E-06 0.335E-06 -.330E-05  
              -.940E+00 -.159E+02 -.286E+03    0.931E+00 0.158E+02 0.285E+03    0.600E-02 0.908E-01

0.802E-01 0.508E-07 -.589E-06 -.379E-05  
-.644E+00 -.265E+02 0.293E+03 0.640E+00 0.265E+02 -.293E+03 0.491E-02 0.234E-01 -  
.270E-01 0.193E-06 0.679E-06 0.393E-05  
-.534E+00 0.139E+03 0.289E+03 0.530E+00 -.139E+03 -.289E+03 0.655E-02 0.114E+00 -  
.213E-01 0.116E-06 0.243E-07 0.450E-05  
0.778E+00 0.408E+02 -.287E+03 -.790E+00 -.408E+02 0.287E+03 0.515E-02 0.211E-02 -  
.191E-01 0.552E-06 -.117E-06 -.381E-05  
-.459E+00 -.113E+03 -.276E+03 0.425E+00 0.113E+03 0.276E+03 0.348E-01 0.602E-01 -  
.268E+00 -.224E-08 0.568E-06 -.317E-05  
-.572E+00 0.206E+03 0.279E+03 0.570E+00 -.206E+03 -.279E+03 0.115E-02 0.721E-01 -  
.455E-01 0.986E-07 -.209E-06 0.434E-05  
-.783E+00 0.304E+02 0.294E+03 0.787E+00 -.304E+02 -.294E+03 -.755E-02 -.308E-01 -  
.138E-02 0.133E-06 0.911E-06 0.387E-05  
-.123E+01 0.144E+03 -.281E+03 0.125E+01 -.145E+03 0.281E+03 -.158E-01 0.122E+00  
0.504E-01 -.329E-06 0.379E-07 -.323E-05  
-.366E+01 -.174E+02 -.283E+03 0.369E+01 0.173E+02 0.283E+03 -.308E-01 0.116E+00  
0.587E-01 0.130E-05 0.142E-05 -.335E-05  
-.130E+01 -.277E+02 0.291E+03 0.129E+01 0.277E+02 -.291E+03 -.132E-02 0.341E-01 -  
.219E-01 0.650E-07 0.820E-06 0.369E-05  
-.347E+00 0.139E+03 0.289E+03 0.347E+00 -.139E+03 -.289E+03 0.164E-04 0.112E+00 -  
.146E-01 0.239E-06 0.270E-07 0.426E-05  
-.829E+00 0.400E+02 -.287E+03 0.821E+00 -.400E+02 0.287E+03 0.126E-01 -.748E-02 -

.182E-01    -.574E-06 0.106E-06 -.365E-05  
              -.786E+01 -.119E+03 -.267E+03    0.805E+01 0.119E+03 0.267E+03    -.190E+00 0.324E-02  
0.345E-01    0.122E-05 0.194E-06 -.276E-05  
              -.409E+00 0.206E+03 0.279E+03    0.410E+00 -.206E+03 -.279E+03    -.280E-02 0.716E-01 -  
.464E-01    0.196E-06 -.163E-06 0.407E-05  
              -.631E-01 0.300E+02 0.294E+03    0.728E-01 -.299E+02 -.294E+03    -.948E-02 -.347E-01  
0.122E-02    -.107E-06 0.508E-06 0.384E-05  
              -.206E+01 0.145E+03 -.282E+03    0.208E+01 -.145E+03 0.282E+03    -.189E-01 0.132E+00  
0.256E-01    -.281E-07 -.762E-06 -.325E-05  
              -.257E+01 -.208E+02 -.285E+03    0.259E+01 0.208E+02 0.285E+03    -.291E-01 0.409E-01  
0.318E-01    -.105E-07 0.186E-05 -.316E-05  
              -.552E+00 -.290E+02 0.291E+03    0.557E+00 0.290E+02 -.291E+03    -.285E-02 0.292E-01 -  
.251E-01    -.306E-07 0.562E-06 0.359E-05  
              0.590E-01 0.139E+03 0.289E+03    -.592E-01 -.139E+03 -.289E+03    -.341E-03 0.109E+00 -  
.208E-01    0.511E-07 0.137E-07 0.406E-05  
              -.290E+01 0.378E+02 -.286E+03    0.291E+01 -.378E+02 0.286E+03    -.147E-01 -.368E-02  
0.209E-01    -.612E-07 0.193E-05 -.328E-05  
              -.514E+01 -.128E+03 -.271E+03    0.518E+01 0.128E+03 0.271E+03    -.464E-01 -.862E-01  
0.378E-01    -.223E-06 0.110E-05 -.242E-05  
              0.400E+00 -.137E+03 0.280E+03    -.392E+00 0.137E+03 -.280E+03    -.969E-02 -.127E+00 -  
.156E-01    -.631E-07 0.958E-06 0.306E-05  
              0.194E+01 -.343E+03 0.233E+03    -.194E+01 0.344E+03 -.233E+03    0.911E-02 -.461E+00 -

.546E-01    -.338E-06 0.283E-05 0.115E-05  
          -.253E+01 -.197E+03 -.259E+03    0.254E+01 0.197E+03 0.259E+03    -.947E-02 -.198E+00  
0.369E-01    0.735E-06 0.277E-05 -.187E-05  
          0.691E+01 -.447E+03 -.198E+03    -.693E+01 0.448E+03 0.198E+03    0.966E-02 -.112E+01  
0.881E-01    -.404E-06 0.263E-06 -.145E-06  
          -.464E+00 -.451E+03 0.204E+03    0.465E+00 0.452E+03 -.204E+03    -.207E-02 -.108E+01 -  
.112E+00    -.174E-06 0.308E-05 0.499E-06  
          0.171E+01 -.203E+03 0.269E+03    -.171E+01 0.203E+03 -.269E+03    -.481E-02 -.926E-01 -  
.320E-01    -.400E-06 0.758E-06 0.261E-05  
          -.211E+01 -.338E+03 -.222E+03    0.215E+01 0.338E+03 0.222E+03    -.442E-01 -.604E+00  
0.538E-01    0.764E-06 -.351E-06 -.591E-06  
          0.218E+01 -.136E+03 0.282E+03    -.218E+01 0.136E+03 -.282E+03    -.636E-02 -.126E+00 -  
.941E-02    -.106E-06 0.611E-06 0.331E-05  
          0.672E+01 -.339E+03 0.238E+03    -.670E+01 0.340E+03 -.238E+03    -.127E-01 -.461E+00 -  
.459E-01    0.353E-06 0.280E-05 0.117E-05  
          0.678E+01 -.193E+03 -.258E+03    -.680E+01 0.193E+03 0.258E+03    0.111E-01 -.145E+00  
0.633E-01    -.119E-05 0.257E-05 -.198E-05  
          0.313E+02 -.427E+03 -.198E+03    -.313E+02 0.428E+03 0.197E+03    0.726E-01 -.970E+00  
0.135E+00    -.913E-06 0.658E-06 -.373E-06  
          0.544E+01 -.449E+03 0.209E+03    -.544E+01 0.450E+03 -.209E+03    0.602E-03 -.108E+01 -  
.798E-01    -.197E-06 0.334E-05 0.512E-06  
          0.368E+01 -.201E+03 0.272E+03    -.368E+01 0.201E+03 -.272E+03    -.735E-03 -.976E-01 -

.306E-01 0.225E-06 0.850E-06 0.274E-05  
0.124E+02 -.332E+03 -.223E+03 -.125E+02 0.332E+03 0.223E+03 0.121E+00 -.535E+00  
0.314E-01 -.124E-05 -.606E-06 -.656E-06  
0.219E+01 -.133E+03 0.283E+03 -.219E+01 0.133E+03 -.283E+03 0.542E-03 -.128E+00 -  
.442E-02 0.321E-07 0.116E-05 0.328E-05  
0.492E+01 -.332E+03 0.245E+03 -.489E+01 0.332E+03 -.245E+03 -.319E-01 -.476E+00 -  
.375E-01 0.363E-06 0.243E-05 0.817E-06  
0.112E+02 -.182E+03 -.258E+03 -.113E+02 0.182E+03 0.258E+03 0.472E-01 -.989E-01 -  
.104E+00 -.100E-05 -.127E-06 -.261E-05  
0.318E+02 -.399E+03 -.175E+03 -.321E+02 0.401E+03 0.174E+03 0.296E+00 -.142E+01  
0.132E+01 -.126E-06 0.976E-06 -.207E-05  
0.930E+01 -.443E+03 0.219E+03 -.930E+01 0.444E+03 -.219E+03 -.562E-02 -.109E+01 -  
.483E-01 -.722E-08 0.313E-05 0.186E-06  
0.169E+01 -.196E+03 0.273E+03 -.170E+01 0.197E+03 -.273E+03 0.550E-02 -.109E+00 -  
.511E-01 0.389E-06 0.125E-05 0.254E-05  
0.172E+02 -.310E+03 -.216E+03 -.175E+02 0.310E+03 0.216E+03 0.325E+00 -.219E+00  
0.123E+00 -.213E-05 0.292E-06 -.173E-05  
-.104E+01 -.132E+03 0.281E+03 0.103E+01 0.132E+03 -.281E+03 0.103E-01 -.127E+00  
0.152E-03 0.215E-06 0.145E-05 0.296E-05  
-.512E+01 -.332E+03 0.239E+03 0.512E+01 0.332E+03 -.239E+03 0.883E-02 -.494E+00 -  
.419E-01 0.231E-06 0.239E-05 0.329E-06  
0.158E+01 -.170E+03 -.261E+03 -.170E+01 0.169E+03 0.261E+03 0.118E+00 0.372E+00 -

.934E-01    -.846E-06 0.469E-06 -.263E-05  
          -.654E+01 -.301E+03 -.189E+03    0.606E+01 0.296E+03 0.185E+03    0.473E+00 0.504E+01  
0.404E+01    0.210E-06 0.343E-06 -.238E-06  
          -.623E+00 -.436E+03 0.227E+03    0.621E+00 0.437E+03 -.227E+03    0.164E-02 -.120E+01 -  
.481E-01    0.311E-06 0.285E-05 -.330E-06  
          -.302E+01 -.197E+03 0.268E+03    0.301E+01 0.197E+03 -.268E+03    0.146E-01 -.112E+00 -  
.428E-01    0.115E-06 0.137E-05 0.214E-05  
          0.333E+01 -.280E+03 -.215E+03    -.525E+01 0.280E+03 0.214E+03    0.191E+01 0.643E+00  
0.821E+00    -.152E-05 -.130E-06 -.156E-05  
          -.274E+01 -.134E+03 0.277E+03    0.274E+01 0.134E+03 -.277E+03    0.247E-02 -.123E+00 -  
.185E-01    0.580E-07 0.117E-05 0.269E-05  
          -.601E+01 -.338E+03 0.230E+03    0.600E+01 0.339E+03 -.230E+03    0.113E-01 -.494E+00 -  
.460E-01    -.157E-06 0.258E-05 0.517E-07  
          -.650E+01 -.171E+03 -.257E+03    0.658E+01 0.170E+03 0.257E+03    -.775E-01 0.485E+00  
0.181E-01    0.101E-05 0.306E-06 -.230E-05  
          -.442E+02 -.422E+03 -.184E+03    0.448E+02 0.423E+03 0.183E+03    -.563E+00 -.110E+01  
0.627E+00    0.935E-06 0.202E-05 -.783E-06  
          -.867E+01 -.441E+03 0.211E+03    0.866E+01 0.442E+03 -.211E+03    0.144E-01 -.111E+01 -  
.752E-01    0.136E-06 0.319E-05 -.816E-06  
          -.293E+01 -.201E+03 0.265E+03    0.294E+01 0.201E+03 -.265E+03    -.917E-02 -.110E+00 -  
.204E-01    -.647E-07 0.125E-05 0.193E-05  
          -.145E+02 -.290E+03 -.209E+03    0.165E+02 0.289E+03 0.208E+03    -.198E+01 0.605E+00

0.784E+00 0.225E-05 0.481E-06 -.908E-06  
-.139E+01 -.136E+03 0.277E+03 0.140E+01 0.136E+03 -.277E+03 -.102E-01 -.125E+00 -  
.239E-01 -.821E-07 0.117E-05 0.275E-05  
-.279E+01 -.343E+03 0.230E+03 0.277E+01 0.343E+03 -.230E+03 0.235E-01 -.473E+00 -  
.592E-01 -.410E-06 0.256E-05 0.706E-06  
-.104E+02 -.189E+03 -.258E+03 0.105E+02 0.189E+03 0.258E+03 -.771E-01 -.139E+00 -  
.526E-01 0.126E-05 0.623E-06 -.204E-05  
-.149E+02 -.446E+03 -.196E+03 0.150E+02 0.447E+03 0.196E+03 -.693E-01 -.113E+01  
0.998E-01 0.590E-06 0.157E-05 -.343E-06  
-.549E+01 -.448E+03 0.204E+03 0.550E+01 0.449E+03 -.203E+03 -.485E-02 -.109E+01 -  
.125E+00 -.823E-07 0.318E-05 -.444E-06  
-.912E+00 -.203E+03 0.267E+03 0.920E+00 0.203E+03 -.267E+03 -.911E-02 -.102E+00 -  
.317E-01 -.303E-06 0.114E-05 0.235E-05  
-.163E+02 -.329E+03 -.218E+03 0.166E+02 0.329E+03 0.218E+03 -.360E+00 -.480E+00  
0.429E-01 0.175E-05 0.670E-06 -.997E-06  
-.335E+01 -.256E+03 -.194E+03 0.236E+01 0.248E+03 0.189E+03 0.979E+00 0.780E+01  
0.489E+01 0.103E-05 0.278E-05 0.200E-05  
0.531E+02 -.518E+03 -.137E+03 -.541E+02 0.522E+03 0.141E+03 0.105E+01 -.396E+01 -  
.382E+01 -.143E-05 0.220E-05 -.108E-05  
-.466E+02 -.585E+03 -.446E+03 0.524E+02 0.636E+03 0.481E+03 -.586E+01 -.510E+02 -  
.343E+02 0.259E-05 0.484E-05 0.473E-05

-----

0.436E+01 0.278E+02 0.224E+02 - .327E-12 -.216E-11 0.165E-11 - .441E+01 -.278E+02 -  
.224E+02 0.231E-05 0.503E-04 0.458E-04

| POSITION | TOTAL-FORCE (eV/Angst) |         |           |           |           |
|----------|------------------------|---------|-----------|-----------|-----------|
| 1.24575  | 4.02870                | 5.43979 | 0.000041  | 0.001024  | -0.000410 |
| 1.21024  | 4.07581                | 8.43726 | -0.000985 | 0.002614  | -0.001142 |
| 3.70862  | 4.02890                | 5.43965 | 0.000308  | 0.001895  | -0.001095 |
| 3.67998  | 4.07733                | 8.43690 | -0.004035 | -0.000418 | -0.002900 |
| 6.17157  | 4.02854                | 5.43942 | -0.000007 | -0.000134 | -0.001753 |
| 6.14482  | 4.08292                | 8.43295 | -0.002834 | -0.003301 | -0.003191 |
| 8.63513  | 4.02801                | 5.43869 | 0.000777  | -0.000438 | -0.002003 |
| 8.60339  | 4.08732                | 8.43089 | -0.000134 | -0.001175 | -0.002212 |
| 11.09928 | 4.02784                | 5.43885 | 0.000873  | 0.001976  | -0.002713 |
| 11.06021 | 4.08619                | 8.43099 | -0.001746 | 0.000706  | -0.000644 |
| 13.56311 | 4.02807                | 5.43972 | 0.000332  | 0.001626  | -0.001620 |
| 13.52141 | 4.08047                | 8.43349 | 0.000402  | -0.002253 | 0.000295  |
| 2.44241  | 15.48073               | 8.85224 | -0.000622 | -0.005273 | 0.002324  |
| 0.01714  | 15.44624               | 5.32469 | 0.000346  | 0.001533  | -0.001196 |
| 4.86040  | 15.47728               | 8.86623 | 0.001094  | 0.000213  | -0.000356 |
| 2.48016  | 15.44854               | 5.27562 | 0.000363  | -0.001207 | -0.000510 |

|          |          |         |           |           |           |
|----------|----------|---------|-----------|-----------|-----------|
| 4.94382  | 15.44925 | 5.24869 | 0.001780  | -0.003002 | 0.000307  |
| 12.31531 | 15.48242 | 9.00211 | -0.004285 | 0.001585  | 0.004161  |
| 9.86772  | 15.44556 | 5.34176 | 0.000427  | -0.001112 | 0.000908  |
| 14.76279 | 15.48245 | 8.89951 | -0.006129 | -0.000475 | 0.005517  |
| 12.33384 | 15.44510 | 5.36128 | 0.001361  | -0.003219 | -0.001281 |
| 7.40743  | 15.44616 | 5.26463 | 0.002371  | 0.001542  | 0.001391  |
| 6.44846  | 16.34427 | 7.40648 | -0.002676 | -0.001174 | 0.002046  |
| 8.60064  | 16.47644 | 7.89249 | 0.005088  | 0.002096  | 0.005110  |
| 1.24544  | 5.11881  | 5.35500 | 0.000946  | 0.000163  | -0.002454 |
| 2.44348  | 5.83889  | 8.62292 | 0.002420  | -0.004431 | 0.001216  |
| 0.01380  | 5.79530  | 5.28573 | 0.002076  | -0.002457 | 0.000473  |
| 1.21063  | 5.16420  | 8.54151 | 0.000256  | -0.000513 | -0.001897 |
| 2.44351  | 7.27931  | 8.74832 | -0.000079 | -0.001258 | -0.000127 |
| 3.70866  | 5.11896  | 5.35390 | -0.000425 | -0.001626 | 0.000336  |
| 4.90800  | 5.84315  | 8.62123 | -0.001081 | 0.003830  | -0.000759 |
| 2.47701  | 5.79561  | 5.28397 | 0.001449  | -0.000600 | -0.002606 |
| 3.67679  | 5.16572  | 8.54000 | -0.000123 | 0.001641  | -0.000045 |
| 4.90764  | 7.28398  | 8.74777 | 0.000698  | -0.000612 | 0.001031  |
| 6.17184  | 5.11860  | 5.35433 | 0.001477  | 0.000392  | 0.000897  |
| 7.37096  | 5.84929  | 8.62094 | -0.000622 | 0.007087  | -0.002456 |
| 4.94029  | 5.79548  | 5.28340 | 0.000602  | -0.002691 | -0.001173 |
| 6.14080  | 5.17108  | 8.53715 | -0.002519 | 0.002538  | 0.002460  |

|          |          |         |           |           |           |
|----------|----------|---------|-----------|-----------|-----------|
| 7.37071  | 7.28983  | 8.75132 | -0.001989 | 0.001604  | 0.000134  |
| 8.63543  | 5.11820  | 5.35521 | 0.001240  | 0.001352  | -0.001068 |
| 9.83233  | 5.85166  | 8.62337 | 0.002789  | 0.000655  | -0.001100 |
| 7.40374  | 5.79498  | 5.28512 | 0.003456  | -0.002691 | -0.001337 |
| 8.60194  | 5.17528  | 8.53759 | -0.001891 | -0.000423 | -0.000216 |
| 9.83204  | 7.29110  | 8.75719 | -0.001834 | -0.002606 | -0.002436 |
| 11.09930 | 5.11814  | 5.35578 | -0.000869 | -0.003344 | -0.001362 |
| 12.29449 | 5.84673  | 8.62385 | 0.000027  | 0.005747  | -0.002203 |
| 9.86750  | 5.79468  | 5.28678 | -0.000748 | -0.000719 | 0.001552  |
| 11.06261 | 5.17409  | 8.53894 | 0.002659  | 0.002689  | -0.000399 |
| 12.29428 | 7.28729  | 8.75533 | -0.004530 | 0.001185  | -0.001521 |
| 13.56278 | 5.11829  | 5.35605 | 0.002656  | 0.000536  | -0.001982 |
| 14.75895 | 5.83988  | 8.62434 | -0.000230 | -0.002660 | -0.002199 |
| 12.33118 | 5.79480  | 5.28692 | -0.004505 | -0.001471 | 0.002595  |
| 13.52535 | 5.16844  | 8.54022 | -0.003506 | 0.003798  | -0.001432 |
| 14.75917 | 7.28012  | 8.75179 | 0.000944  | 0.002537  | -0.000701 |
| 0.01434  | 7.23830  | 5.19017 | 0.000085  | -0.000210 | 0.000078  |
| 1.24689  | 9.38061  | 5.13160 | 0.000543  | -0.001861 | -0.000002 |
| 1.21085  | 7.98059  | 8.79588 | -0.000934 | -0.000483 | 0.001543  |
| 2.44214  | 10.12243 | 8.87141 | -0.000902 | 0.003289  | -0.005011 |
| 0.01532  | 10.08686 | 5.14049 | -0.002041 | -0.000138 | -0.002399 |
| 1.24606  | 7.94244  | 5.15775 | 0.002008  | -0.002604 | 0.000830  |

|         |          |         |           |           |           |
|---------|----------|---------|-----------|-----------|-----------|
| 1.21082 | 9.41592  | 8.85782 | -0.000764 | 0.004388  | 0.000185  |
| 2.44072 | 11.55513 | 8.88414 | -0.006138 | -0.002810 | 0.001634  |
| 2.47747 | 7.23842  | 5.18585 | 0.002795  | 0.002875  | 0.001312  |
| 3.70997 | 9.38055  | 5.12566 | -0.001084 | -0.003011 | 0.000044  |
| 3.67534 | 7.98360  | 8.79349 | -0.000564 | 0.001046  | 0.000949  |
| 4.90487 | 10.12925 | 8.87518 | 0.000247  | -0.000261 | 0.000031  |
| 2.47867 | 10.08713 | 5.12695 | -0.002269 | 0.001499  | 0.000764  |
| 3.70939 | 7.94242  | 5.15441 | 0.000820  | -0.004013 | -0.001698 |
| 3.67589 | 9.41970  | 8.85445 | -0.001460 | 0.001932  | -0.000146 |
| 4.90263 | 11.56506 | 8.89086 | -0.000411 | 0.001441  | 0.000910  |
| 4.94085 | 7.23830  | 5.18552 | -0.004705 | 0.002249  | 0.000831  |
| 6.17318 | 9.38002  | 5.13173 | 0.002026  | 0.002091  | 0.001832  |
| 6.13864 | 7.99044  | 8.79647 | 0.002460  | -0.000316 | -0.001670 |
| 7.36780 | 10.13760 | 8.89473 | -0.000643 | 0.003165  | 0.000572  |
| 4.94196 | 10.08682 | 5.12700 | 0.004134  | 0.001476  | -0.001156 |
| 6.17284 | 7.94199  | 5.15766 | -0.000053 | 0.000553  | 0.003032  |
| 6.13939 | 9.42660  | 8.86164 | 0.000767  | -0.000413 | -0.002183 |
| 7.36410 | 11.57721 | 8.92935 | -0.000673 | -0.002169 | 0.003500  |
| 7.40426 | 7.23794  | 5.19012 | 0.002142  | 0.001761  | 0.001073  |
| 8.63700 | 9.37970  | 5.14543 | -0.000542 | 0.002943  | 0.000950  |
| 8.60086 | 7.99568  | 8.80617 | 0.001101  | -0.000541 | -0.001069 |
| 9.83068 | 10.14286 | 8.92842 | -0.002252 | 0.002516  | -0.000708 |

|          |          |         |           |           |           |
|----------|----------|---------|-----------|-----------|-----------|
| 7.40553  | 10.08627 | 5.14064 | 0.001204  | -0.003579 | 0.003145  |
| 8.63637  | 7.94166  | 5.16555 | 0.002611  | 0.001782  | -0.001408 |
| 8.60077  | 9.43254  | 8.88532 | -0.006062 | 0.002372  | -0.001266 |
| 9.82927  | 11.58244 | 9.00096 | 0.001096  | 0.003285  | 0.001010  |
| 9.86805  | 7.23787  | 5.19489 | -0.000369 | 0.000097  | -0.000214 |
| 11.10106 | 9.37979  | 5.15156 | -0.003832 | -0.001035 | 0.000660  |
| 11.06331 | 7.99411  | 8.80818 | -0.000268 | -0.001629 | 0.000118  |
| 12.29815 | 10.12943 | 8.90340 | -0.000825 | -0.001085 | 0.001373  |
| 9.86930  | 10.08593 | 5.15631 | -0.005452 | -0.001463 | 0.001408  |
| 11.10021 | 7.94175  | 5.16862 | -0.000603 | -0.003080 | 0.001390  |
| 11.06206 | 9.43062  | 8.88839 | 0.004615  | 0.001819  | 0.002064  |
| 12.30255 | 11.56557 | 8.94694 | 0.003320  | -0.000837 | -0.000806 |
| 12.33169 | 7.23799  | 5.19447 | -0.001031 | 0.000240  | -0.001753 |
| 13.56437 | 9.38021  | 5.14435 | 0.000726  | 0.001642  | -0.000577 |
| 13.52754 | 7.98555  | 8.80171 | -0.000765 | -0.002567 | -0.003115 |
| 14.76233 | 10.12320 | 8.88285 | -0.005205 | 0.000905  | -0.001614 |
| 12.33257 | 10.08637 | 5.15511 | 0.002640  | 0.000532  | -0.001540 |
| 13.56350 | 7.94214  | 5.16485 | -0.000086 | -0.000895 | -0.000372 |
| 13.52731 | 9.42040  | 8.86925 | -0.000161 | 0.003138  | -0.000535 |
| 14.76430 | 11.55727 | 8.90646 | -0.002221 | -0.000725 | 0.001756  |
| 0.01611  | 11.52516 | 5.16621 | -0.001078 | -0.002566 | 0.000391  |
| 1.24770  | 13.67535 | 5.22209 | 0.001836  | -0.002327 | -0.002482 |

|         |          |         |           |           |           |
|---------|----------|---------|-----------|-----------|-----------|
| 1.21217 | 12.26335 | 8.89409 | 0.000611  | -0.000318 | 0.001179  |
| 2.43998 | 14.38728 | 8.86748 | -0.002686 | 0.000864  | 0.000809  |
| 0.01699 | 14.35408 | 5.27295 | -0.000441 | -0.000665 | -0.001972 |
| 1.24794 | 12.22963 | 5.17275 | 0.001053  | 0.000849  | -0.001363 |
| 1.21434 | 13.70818 | 8.88771 | 0.002067  | 0.002348  | 0.003768  |
| 2.47958 | 11.52580 | 5.14547 | -0.001616 | -0.000201 | -0.001483 |
| 3.71218 | 13.67636 | 5.19535 | 0.004633  | 0.000579  | 0.001067  |
| 3.66932 | 12.26248 | 8.88184 | -0.002107 | 0.000018  | -0.000624 |
| 4.89370 | 14.38589 | 8.86075 | 0.004012  | -0.001493 | -0.002451 |
| 2.48000 | 14.35596 | 5.23149 | 0.001282  | -0.001176 | 0.001686  |
| 3.71150 | 12.23022 | 5.15602 | 0.000901  | -0.004535 | 0.001008  |
| 3.66212 | 13.70366 | 8.87117 | -0.005216 | 0.004170  | -0.000652 |
| 4.94290 | 11.52542 | 5.14351 | -0.000071 | -0.001779 | -0.001602 |
| 6.17627 | 13.67505 | 5.20032 | 0.000855  | 0.000596  | 0.000063  |
| 6.13145 | 12.27911 | 8.90591 | 0.005248  | 0.006535  | 0.004619  |
| 7.36614 | 14.42967 | 8.88203 | -0.000135 | -0.000458 | 0.000254  |
| 4.94347 | 14.35627 | 5.21375 | 0.000104  | -0.001898 | 0.001066  |
| 6.17493 | 12.22917 | 5.16623 | -0.001422 | -0.001049 | 0.001554  |
| 6.11879 | 13.72336 | 8.87765 | 0.005259  | 0.001201  | 0.000124  |
| 7.40625 | 11.52413 | 5.16368 | 0.000910  | -0.003354 | 0.000353  |
| 8.63876 | 13.67323 | 5.24377 | 0.001853  | 0.002098  | -0.001322 |
| 8.58939 | 12.29067 | 9.00208 | -0.000498 | 0.000682  | -0.000838 |

|          |          |          |           |           |           |
|----------|----------|----------|-----------|-----------|-----------|
| 9.83855  | 14.39048 | 9.30305  | 0.004608  | -0.001779 | 0.002149  |
| 7.40672  | 14.35386 | 5.23530  | -0.001144 | -0.000359 | -0.000752 |
| 8.63820  | 12.22778 | 5.19800  | 0.000308  | -0.001243 | 0.001058  |
| 8.55571  | 13.73596 | 9.04598  | 0.000930  | -0.004883 | 0.004121  |
| 9.86985  | 11.52338 | 5.18893  | 0.001750  | -0.001978 | -0.000110 |
| 11.10099 | 13.67352 | 5.27669  | 0.003182  | -0.000864 | -0.000982 |
| 11.07378 | 12.27333 | 9.00891  | -0.003484 | 0.003910  | -0.002746 |
| 12.30694 | 14.38896 | 9.00333  | -0.001226 | -0.001113 | 0.001405  |
| 9.86934  | 14.35300 | 5.29564  | 0.002925  | 0.000015  | -0.000039 |
| 11.10161 | 12.22804 | 5.21650  | -0.001114 | -0.002727 | 0.001058  |
| 11.11464 | 13.70636 | 9.07877  | 0.001887  | 0.000292  | -0.000060 |
| 12.33326 | 11.52411 | 5.18815  | -0.000926 | 0.000279  | 0.000533  |
| 13.56430 | 13.67399 | 5.25995  | 0.001560  | -0.000022 | 0.000084  |
| 13.53626 | 12.26601 | 8.93587  | -0.002292 | 0.004248  | 0.002106  |
| 14.76266 | 14.38906 | 8.90426  | -0.003758 | 0.001204  | 0.003635  |
| 12.33397 | 14.35288 | 5.30710  | 0.002775  | -0.001899 | -0.001764 |
| 13.56505 | 12.22870 | 5.20105  | 0.000101  | 0.000092  | -0.001137 |
| 13.54921 | 13.70690 | 8.94399  | -0.000579 | -0.003611 | 0.001053  |
| 9.91126  | 15.53185 | 9.99472  | 0.002291  | 0.004294  | 0.005909  |
| 7.28864  | 16.40884 | 8.69813  | -0.000091 | -0.004292 | -0.002828 |
| 10.02526 | 16.50365 | 10.64498 | 0.003072  | -0.002275 | 0.000150  |

---

total drift:                                     -0.044294           0.025188           -0.022834

---

FREE ENERGIE OF THE ION-ELECTRON SYSTEM (eV)

---

free energy TOTEN =     -1209.38927529 eV

energy without entropy=     -1209.38927529   energy(sigma->0) =     -1209.38927529

---

POTLOK:   cpu time     0.1777: real time     0.1783

---

stress matrix after NEB project (eV)

-17.74331     -0.24794     0.05475

-0.24794     -15.28199     0.45689

0.05475     0.45689     -19.05281

FORCES: max atom, RMS     0.007655     0.000706

FORCE total and by dimension     0.008558     0.005909

Stress total and by dimension     30.198016     19.052805

-----

```
|
|
|      W   W   AA   RRRRR   N   N   II   N   N   GGGG   !!!
|
|      W   W   A   A   R   R   NN   N   II   NN   N   G   G   !!!
|
|      W   W   A   A   R   R   NN   N   II   NN   N   G   !!!
|
|      W WW W   AAAAAA   RRRRR   N   NN   II   N   NN   G   GGG   !
|
|
|      WW   WW   A   A   R   R   N   NN   II   N   NN   G   G
|
|
|      W   W   A   A   R   R   N   N   II   N   N   GGGG   !!!
|
|
|
```

Your timestep is larger than 0.1 Angst.

| For finite differences this really does not make sense. I will |  
| reset POTIM to 0.015. I recommend to use 0.01 to 0.02 for finite |  
| differences. |  
| |

-----

Finite differences:

Step POTIM = 1.5000000000000000E-002

Degrees of freedom DOF = 6

LATTYP: Found a simple orthorhombic cell.

ALAT = 14.7806000000

B/A-ratio = 1.2466138046

C/A-ratio = 1.4433717170

Lattice vectors:

A1 = ( -14.7806000000, 0.0000000000, 0.0000000000)

A2 = ( 0.0000000000, 0.0000000000, -18.4257000000)

A3 = ( 0.0000000000, -21.3339000000, 0.0000000000)

Analysis of symmetry for initial positions (statically):

---

---

Subroutine PRICEL returns:

Original cell was already a primitive cell.

Routine SETGRP: Setting up the symmetry group for a  
simple orthorhombic supercell.

Subroutine GETGRP returns: Found 1 space group operations  
(whereof 1 operations were pure point group operations)  
out of a pool of 8 trial point group operations.

The static configuration has the point symmetry C<sub>1</sub>.

Analysis of symmetry for dynamics (positions and initial velocities):

---

---

Subroutine PRICEL returns:

Original cell was already a primitive cell.

Routine SETGRP: Setting up the symmetry group for a  
simple orthorhombic supercell.

Subroutine GETGRP returns: Found 1 space group operations  
(whereof 1 operations were pure point group operations)  
out of a pool of 8 trial point group operations.

The dynamic configuration has the point symmetry  $C_1$ .

Analysis of constrained symmetry for selective dynamics:

=====

Subroutine PRICEL returns:

Original cell was already a primitive cell.

Routine SETGRP: Setting up the symmetry group for a  
simple orthorhombic supercell.

Subroutine GETGRP returns: Found 1 space group operations

(whereof 1 operations were pure point group operations)

out of a pool of 8 trial point group operations.

The constrained configuration has the point symmetry  $C_1$ .

Analysis of structural, dynamic, and magnetic symmetry:

=====

Subroutine PRICEL returns:

Original cell was already a primitive cell.

Routine SETGRP: Setting up the symmetry group for a

simple orthorhombic supercell.

Subroutine GETGRP returns: Found 1 space group operations

(whereof 1 operations were pure point group operations)

out of a pool of 8 trial point group operations.

The magnetic configuration has the point symmetry C<sub>1</sub> .

Subroutine INISYM returns: Found 1 space group operations

(whereof 1 operations are pure point group operations),

and found 1 'primitive' translations

KPOINTS: KPT-Resolved Value to Generate K-Mesh: 0

Automatic generation of k-mesh.

Space group operators:

| irotn    | det(A)   | alpha    | n_x      | n_y      | n_z      | tau_x    |
|----------|----------|----------|----------|----------|----------|----------|
| tau_y    | tau_z    |          |          |          |          |          |
| 1        | 1.000000 | 0.000000 | 1.000000 | 0.000000 | 0.000000 | 0.000000 |
| 0.000000 | 0.000000 |          |          |          |          |          |

Subroutine IBZKPT returns following result:

=====

Found 1 irreducible k-points:

Following reciprocal coordinates:

| Coordinates |          |          | Weight   |
|-------------|----------|----------|----------|
| 0.000000    | 0.000000 | 0.000000 | 1.000000 |

Following cartesian coordinates:

| Coordinates |          |          | Weight   |
|-------------|----------|----------|----------|
| 0.000000    | 0.000000 | 0.000000 | 1.000000 |

WAVPRE: cpu time 0.1227: real time 0.1357

FEWALD: cpu time 0.0028: real time 0.0028

ORTHCH: cpu time 1.0128: real time 1.0158

LOOP+: cpu time 413.9708: real time 416.2489

----- Iteration 2( 1) -----

POTLOK: cpu time 0.1737: real time 0.1872

SETDIJ: cpu time 0.0101: real time 0.0101

EDDIAG: cpu time 1.9279: real time 1.9348

RMM-DIIS:  cpu time    7.1336: real time    7.1565

  ORTHCH:  cpu time    0.3517: real time    0.3530

    DOS:  cpu time    0.0004: real time    0.0004

  CHARGE:  cpu time    0.5244: real time    0.5262

  MIXING:  cpu time    0.0044: real time    0.0043

-----

  LOOP:  cpu time   10.1260: real time   10.1724

eigenvalue-minimisations : 1927

total energy-change (2. order) : 0.2034728E-02 (-0.4345576E-01)

number of electron    518.9999724 magnetization    0.9999987

augmentation part    11.7377713 magnetization    0.0542772

Broyden mixing:

rms(total) = 0.15660E-01    rms(broyden)= 0.15501E-01

rms(prec ) = 0.15951E-01

weight for this iteration    100.00

Free energy of the ion-electron system (eV)

-----

alpha Z           PSCENC =           233.50077011

Ewald energy    TEWEN =           91329.16747224

-Hartree energ DENC = -107335.75640856

-exchange EXHF = 0.00000000

-V(xc)+E(xc) XCENC = 1743.79841311

PAW double counting = 52176.83292844 -52239.75174389

entropy T\*S EENTRO = -0.00000000

eigenvalues EBANDS = -5814.89079617

atomic energy EATOM = 18704.32991668

Solvation Ediel\_sol = 0.00000000

-----  
free energy TOTEN = -1202.76944803 eV

energy without entropy = -1202.76944803 energy(sigma->0) = -1202.76944803

----- Iteration 2( 2) -----

|           |          |          |           |         |
|-----------|----------|----------|-----------|---------|
| POTLOK:   | cpu time | 0.1684:  | real time | 0.1876  |
| SETDIJ:   | cpu time | 0.0101:  | real time | 0.0102  |
| EDDIAG:   | cpu time | 1.9253:  | real time | 1.9318  |
| RMM-DIIS: | cpu time | 7.1126:  | real time | 7.1508  |
| ORTHCH:   | cpu time | 0.3522:  | real time | 0.3532  |
| DOS:      | cpu time | 0.0004:  | real time | 0.0004  |
| CHARGE:   | cpu time | 0.5254:  | real time | 0.5272  |
| MIXING:   | cpu time | 0.0046:  | real time | 0.0046  |
| -----     |          |          |           |         |
| LOOP:     | cpu time | 10.0990: | real time | 10.1658 |

eigenvalue-minimisations : 1920

total energy-change (2. order) :-0.3226761E-03 (-0.4205479E-03)

number of electron 518.9999724 magnetization 0.9999989

augmentation part 11.7373389 magnetization 0.0542768

Broyden mixing:

rms(total) = 0.86718E-02 rms(broyden)= 0.86583E-02

rms(prec ) = 0.89223E-02

weight for this iteration 100.00

eigenvalues of (default mixing \* dielectric matrix)

average eigenvalue GAMMA= 1.6384

1.6384

Free energy of the ion-electron system (eV)

-----

alpha Z PSCENC = 233.50077011

Ewald energy TEWEN = 91329.16747224

-Hartree energy DENC = -107335.81461299

-exchange EXHF = 0.00000000

-V(xc)+E(xc) XCENC = 1743.80027133

PAW double counting = 52177.19011832 -52240.10950715

entropy T\*S EENTRO = -0.00000000

eigenvalues EBANDS = -5814.83419924

atomic energy EATOM = 18704.32991668

Solvation Ediel\_sol = 0.00000000

-----

free energy TOTEN = -1202.76977070 eV

energy without entropy = -1202.76977070 energy(sigma->0) = -1202.76977070

-----

----- Iteration 2( 3) -----

POTLOK: cpu time 0.1693: real time 0.1849  
SETDIJ: cpu time 0.0100: real time 0.0101  
EDDIAG: cpu time 1.9225: real time 1.9289  
RMM-DIIS: cpu time 7.1451: real time 7.1816  
ORTHCH: cpu time 0.3542: real time 0.3553  
DOS: cpu time 0.0004: real time 0.0004  
CHARGE: cpu time 0.5247: real time 0.5266  
MIXING: cpu time 0.0048: real time 0.0049

-----

LOOP: cpu time 10.1312: real time 10.1927

eigenvalue-minimisations : 1937

total energy-change (2. order) :-0.2709967E-04 (-0.1805602E-04)

number of electron 518.9999724 magnetization 0.9999991

augmentation part 11.7379081 magnetization 0.0542765

Broyden mixing:

rms(total) = 0.36107E-02      rms(broyden)= 0.36085E-02

rms(prec ) = 0.37584E-02

weight for this iteration      100.00

eigenvalues of (default mixing \* dielectric matrix)

average eigenvalue GAMMA=    1.4920

0.7253   2.2588

Free energy of the ion-electron system (eV)

-----

alpha Z          PSCENC =          233.50077011

Ewald energy    TEWEN   =          91329.16747224

-Hartree energy DENC   =   -107335.84836826

-exchange       EXHF     =          0.00000000

-V(xc)+E(xc)    XCENC   =          1743.79864593

PAW double counting   =   52177.61014159   -52240.52928607

entropy T\*S     EENTRO =          -0.00000000

eigenvalues     EBANDS =          -5814.79909003

atomic energy   EATOM   =          18704.32991668

Solvation    Ediel\_sol   =          0.00000000

-----  
free energy    TOTEN    =    -1202.76979780 eV

energy without entropy =    -1202.76979780    energy(sigma->0) =    -1202.76979780

----- Iteration    2( 4) -----

|           |          |         |           |        |
|-----------|----------|---------|-----------|--------|
| POTLOK:   | cpu time | 0.1686: | real time | 0.1845 |
| SETDIJ:   | cpu time | 0.0101: | real time | 0.0101 |
| EDDIAG:   | cpu time | 1.9190: | real time | 1.9259 |
| RMM-DIIS: | cpu time | 7.1347: | real time | 7.1617 |
| ORTHCH:   | cpu time | 0.3538: | real time | 0.3551 |
| DOS:      | cpu time | 0.0003: | real time | 0.0003 |
| CHARGE:   | cpu time | 0.5272: | real time | 0.5287 |
| MIXING:   | cpu time | 0.0053: | real time | 0.0053 |

-----  
LOOP:  cpu time   10.1191: real time   10.1714

eigenvalue-minimisations   :   1912

total energy-change (2. order) :-0.4218513E-05   (-0.2809078E-05)

number of electron       518.9999724 magnetization       0.9999992

augmentation part       11.7376711 magnetization       0.0542758

Broyden mixing:

rms(total) = 0.96218E-03       rms(broyden)= 0.96115E-03

rms(prec ) = 0.10451E-02

weight for this iteration       100.00

eigenvalues of (default mixing \* dielectric matrix)

average eigenvalue GAMMA=   1.3919

2.3964   0.8896   0.8896

Free energy of the ion-electron system (eV)

-----  
alpha Z       PSCENC =       233.50077011

Ewald energy   TEWEN =       91329.16747224

-Hartree energ DENC =   -107335.88236620

-exchange EXHF = 0.00000000  
-V(xc)+E(xc) XCENC = 1743.80051869  
PAW double counting = 52177.92060399 -52240.84040598  
entropy T\*S EENTRO = -0.00000000  
eigenvalues EBANDS = -5814.76631156  
atomic energy EATOM = 18704.32991668  
Solvation Ediel\_sol = 0.00000000

-----  
free energy TOTEN = -1202.76980202 eV

energy without entropy = -1202.76980202 energy(sigma->0) = -1202.76980202

-----  
----- Iteration 2( 5) -----

POTLOK: cpu time 0.1693: real time 0.1869

|           |          |         |           |        |
|-----------|----------|---------|-----------|--------|
| SETDIJ:   | cpu time | 0.0101: | real time | 0.0101 |
| EDDIAG:   | cpu time | 1.9233: | real time | 1.9298 |
| RMM-DIIS: | cpu time | 6.8986: | real time | 6.9251 |
| ORTHCH:   | cpu time | 0.3550: | real time | 0.3561 |
| DOS:      | cpu time | 0.0003: | real time | 0.0003 |
| CHARGE:   | cpu time | 0.5267: | real time | 0.5284 |
| MIXING:   | cpu time | 0.0055: | real time | 0.0055 |
| -----     |          |         |           |        |
| LOOP:     | cpu time | 9.8888: | real time | 9.9421 |

eigenvalue-minimisations : 1834

total energy-change (2. order) : 0.9294272E-06 (-0.3759198E-06)

number of electron      518.9999724 magnetization      0.9999993

augmentation part      11.7376290 magnetization      0.0542760

Broyden mixing:

rms(total) = 0.38644E-03      rms(broyden)= 0.38595E-03

rms(prec ) = 0.42825E-03

weight for this iteration      100.00

eigenvalues of (default mixing \* dielectric matrix)

average eigenvalue GAMMA=      1.4407

2.5248 1.5808 0.8286 0.8286

Free energy of the ion-electron system (eV)

-----  
alpha Z        PSCENC =        233.50077011

Ewald energy    TEWEN =        91329.16747224

-Hartree energ DENC =    -107335.89409020

-exchange       EXHF =            0.00000000

-V(xc)+E(xc)    XCENC =        1743.80059952

PAW double counting =    52177.99190555    -52240.91173807

entropy T\*S     EENTRO =        -0.00000000

eigenvalues     EBANDS =       -5814.75463692

atomic energy   EATOM =        18704.32991668

Solvation    Ediel\_sol =        0.00000000

-----  
free energy     TOTEN =        -1202.76980109 eV

energy without entropy =    -1202.76980109    energy(sigma->0) =    -1202.76980109

-----

----- Iteration 2( 6) -----

POTLOK: cpu time 0.1698: real time 0.1724  
SETDIJ: cpu time 0.0102: real time 0.0102  
EDDIAG: cpu time 1.9250: real time 1.9316  
RMM-DIIS: cpu time 6.1534: real time 6.1870  
ORTHCH: cpu time 0.3530: real time 0.3539  
DOS: cpu time 0.0004: real time 0.0004  
CHARGE: cpu time 0.5247: real time 0.5267  
MIXING: cpu time 0.0057: real time 0.0057

-----

LOOP: cpu time 9.1421: real time 9.1878

eigenvalue-minimisations : 1669

total energy-change (2. order) :-0.1401640E-06 (-0.9823190E-07)

number of electron 518.9999724 magnetization 0.9999994

augmentation part 11.7376232 magnetization 0.0542761

Broyden mixing:

rms(total) = 0.14241E-03      rms(broyden)= 0.14219E-03

rms(prec ) = 0.17035E-03

weight for this iteration      100.00

eigenvalues of (default mixing \* dielectric matrix)

average eigenvalue GAMMA=    1.4054

2.6001   1.8029   0.7808   0.9216   0.9216

Free energy of the ion-electron system (eV)

-----

alpha Z          PSCENC =          233.50077011

Ewald energy    TEWEN   =          91329.16747224

-Hartree energ DENC   =   -107335.90292855

-exchange       EXHF     =          0.00000000

-V(xc)+E(xc)    XCENC   =          1743.80059148

PAW double counting   =   52178.01482352   -52240.93464714

entropy T\*S     EENTRO =          -0.00000000

eigenvalues     EBANDS =          -5814.74579958

atomic energy   EATOM   =          18704.32991668

Solvation    Ediel\_sol   =          0.00000000

-----

free energy TOTEN = -1202.76980123 eV

energy without entropy = -1202.76980123 energy(sigma->0) = -1202.76980123

-----

----- Iteration 2( 7) -----

|           |          |         |           |        |
|-----------|----------|---------|-----------|--------|
| POTLOK:   | cpu time | 0.1678: | real time | 0.1821 |
| SETDIJ:   | cpu time | 0.0101: | real time | 0.0101 |
| EDDIAG:   | cpu time | 1.9246: | real time | 1.9311 |
| RMM-DIIS: | cpu time | 5.2369: | real time | 5.2618 |
| ORTHCH:   | cpu time | 0.3511: | real time | 0.3523 |
| DOS:      | cpu time | 0.0004: | real time | 0.0004 |
| CHARGE:   | cpu time | 0.5236: | real time | 0.5252 |
| MIXING:   | cpu time | 0.0059: | real time | 0.0059 |

-----

LOOP:  cpu time    8.2203: real time    8.2688

eigenvalue-minimisations : 1431

total energy-change (2. order) :-0.5946604E-06  (-0.1179023E-07)

number of electron    518.9999724 magnetization        0.9999995

augmentation part    11.7376277 magnetization        0.0542761

Broyden mixing:

rms(total) = 0.67703E-04    rms(broyden)= 0.67665E-04

rms(prec ) = 0.91649E-04

weight for this iteration    100.00

eigenvalues of (default mixing \* dielectric matrix)

average eigenvalue GAMMA=    1.3648

2.6525  1.9604  1.1376  0.9464  0.8452  0.6469

Free energy of the ion-electron system (eV)

-----

alpha Z           PSCENC =        233.50077011

Ewald energy    TEWEN  =        91329.16747224

-Hartree energ DENC  =   -107335.90839516

-exchange       EXHF   =        0.00000000

-V(xc)+E(xc) XCENC = 1743.80062546

PAW double counting = 52178.00997774 -52240.92979539

entropy T\*S EENTRO = -0.00000000

eigenvalues EBANDS = -5814.74037352

atomic energy EATOM = 18704.32991668

Solvation Ediel\_sol = 0.00000000

-----

free energy TOTEN = -1202.76980183 eV

energy without entropy = -1202.76980183 energy(sigma->0) = -1202.76980183

-----

----- Iteration 2( 8) -----

POTLOK: cpu time 0.1698: real time 0.1782

SETDIJ: cpu time 0.0100: real time 0.0101

|           |          |         |           |        |
|-----------|----------|---------|-----------|--------|
| EDDIAG:   | cpu time | 1.9274: | real time | 1.9340 |
| RMM-DIIS: | cpu time | 5.0093: | real time | 5.0402 |
| ORTHCH:   | cpu time | 0.3514: | real time | 0.3525 |
| DOS:      | cpu time | 0.0004: | real time | 0.0004 |
| CHARGE:   | cpu time | 0.5243: | real time | 0.5258 |
| MIXING:   | cpu time | 0.0064: | real time | 0.0065 |
| -----     |          |         |           |        |
| LOOP:     | cpu time | 7.9990: | real time | 8.0476 |

eigenvalue-minimisations : 1364

total energy-change (2. order) :-0.5621332E-06 (-0.3141435E-08)

number of electron      518.9999724 magnetization      0.9999996

augmentation part      11.7376309 magnetization      0.0542761

Broyden mixing:

rms(total) = 0.39841E-04      rms(broyden)= 0.39819E-04

rms(prec ) = 0.63226E-04

weight for this iteration      100.00

eigenvalues of (default mixing \* dielectric matrix)

average eigenvalue GAMMA=      1.4149

2.6942   2.1882   1.6357   0.9775   0.9775   0.8118   0.6192

Free energy of the ion-electron system (eV)

---

alpha Z        PSCENC =        233.50077011

Ewald energy    TEWEN =        91329.16747224

-Hartree energ DENC =    -107335.91265226

-exchange       EXHF =            0.00000000

-V(xc)+E(xc)    XCENC =        1743.80065401

PAW double counting =    52178.00486372    -52240.92467918

entropy T\*S     EENTRO =        -0.00000000

eigenvalues     EBANDS =        -5814.73614771

atomic energy   EATOM =        18704.32991668

Solvation    Ediel\_sol =        0.00000000

---

free energy     TOTEN =        -1202.76980239 eV

energy without entropy =    -1202.76980239    energy(sigma->0) =    -1202.76980239

---

----- Iteration 2( 9) -----

|           |          |         |           |        |
|-----------|----------|---------|-----------|--------|
| POTLOK:   | cpu time | 0.1694: | real time | 0.1886 |
| SETDIJ:   | cpu time | 0.0100: | real time | 0.0101 |
| EDDIAG:   | cpu time | 1.9205: | real time | 1.9274 |
| RMM-DIIS: | cpu time | 4.9396: | real time | 4.9751 |
| ORTHCH:   | cpu time | 0.3504: | real time | 0.3516 |
| DOS:      | cpu time | 0.0004: | real time | 0.0004 |
| CHARGE:   | cpu time | 0.5230: | real time | 0.5250 |
| MIXING:   | cpu time | 0.0066: | real time | 0.0066 |
| -----     |          |         |           |        |
| LOOP:     | cpu time | 7.9200: | real time | 7.9849 |

eigenvalue-minimisations : 1325

total energy-change (2. order) :-0.8886709E-06 (-0.2720626E-08)

number of electron 518.9999724 magnetization 0.9999997

augmentation part 11.7376323 magnetization 0.0542762

Broyden mixing:

rms(total) = 0.22297E-04      rms(broyden)= 0.22286E-04

rms(prec ) = 0.39994E-04

weight for this iteration      100.00

eigenvalues of (default mixing \* dielectric matrix)

average eigenvalue GAMMA=    1.4647

2.9513   2.5559   1.8787   1.1176   0.9431   0.8275   0.8275   0.6164

Free energy of the ion-electron system (eV)

-----

alpha Z          PSCENC =          233.50077011

Ewald energy    TEWEN =          91329.16747224

-Hartree energy DENC =   -107335.91972256

-exchange       EXHF =            0.00000000

-V(xc)+E(xc)    XCENC =          1743.80070755

PAW double counting =    52177.99823772   -52240.91805542

entropy T\*S     EENTRO =          -0.00000000

eigenvalues     EBANDS =          -5814.72912960

atomic energy   EATOM =          18704.32991668

Solvation       Ediel\_sol =          0.00000000

-----

free energy      TOTEN =          -1202.76980328 eV

energy without entropy = -1202.76980328 energy(sigma->0) = -1202.76980328

-----

----- Iteration 2( 10) -----

|           |          |         |           |        |
|-----------|----------|---------|-----------|--------|
| POTLOK:   | cpu time | 0.1661: | real time | 0.1666 |
| SETDIJ:   | cpu time | 0.0099: | real time | 0.0100 |
| EDDIAG:   | cpu time | 1.9235: | real time | 1.9296 |
| RMM-DIIS: | cpu time | 4.7922: | real time | 4.8156 |
| ORTHCH:   | cpu time | 0.3519: | real time | 0.3531 |
| DOS:      | cpu time | 0.0004: | real time | 0.0004 |
| CHARGE:   | cpu time | 0.5238: | real time | 0.5257 |
| MIXING:   | cpu time | 0.0072: | real time | 0.0072 |

-----

|       |          |         |           |        |
|-------|----------|---------|-----------|--------|
| LOOP: | cpu time | 7.7749: | real time | 7.8081 |
|-------|----------|---------|-----------|--------|

eigenvalue-minimisations : 1269

total energy-change (2. order) :-0.7842609E-06 (-0.2213326E-08)

number of electron      518.9999724 magnetization      0.9999997

augmentation part      11.7376313 magnetization      0.0542762

Broyden mixing:

rms(total) = 0.13628E-04      rms(broyden)= 0.13618E-04

rms(prec ) = 0.25121E-04

weight for this iteration      100.00

eigenvalues of (default mixing \* dielectric matrix)

average eigenvalue GAMMA=      1.4639

3.2135   2.6013   1.9541   1.2963   0.9770   0.9770   0.7989   0.7392   0.6172

Free energy of the ion-electron system (eV)

-----

alpha Z      PSCENC =      233.50077011

Ewald energy      TEWEN =      91329.16747224

-Hartree energ DENC =      -107335.92576374

-exchange      EXHF =      0.00000000

-V(xc)+E(xc)      XCENC =      1743.80075501

PAW double counting = 52177.99521374 -52240.91503648

entropy T\*S EENTRO = -0.00000000

eigenvalues EBANDS = -5814.72313163

atomic energy EATOM = 18704.32991668

Solvation Ediel\_sol = 0.00000000

-----  
free energy TOTEN = -1202.76980406 eV

energy without entropy = -1202.76980406 energy(sigma->0) = -1202.76980406

----- Iteration 2( 11) -----

POTLOK: cpu time 0.1689: real time 0.1758

SETDIJ: cpu time 0.0100: real time 0.0100

EDDIAG: cpu time 1.9232: real time 1.9288

|           |          |         |           |        |
|-----------|----------|---------|-----------|--------|
| RMM-DIIS: | cpu time | 4.6007: | real time | 4.6243 |
| ORTHCH:   | cpu time | 0.3520: | real time | 0.3529 |
| DOS:      | cpu time | 0.0005: | real time | 0.0005 |
| CHARGE:   | cpu time | 0.5279: | real time | 0.5292 |
| MIXING:   | cpu time | 0.0076: | real time | 0.0077 |
| -----     |          |         |           |        |
| LOOP:     | cpu time | 7.5908: | real time | 7.6292 |

eigenvalue-minimisations : 1181

total energy-change (2. order) :-0.6158807E-06 (-0.1217587E-08)

number of electron 518.9999724 magnetization 0.9999998

augmentation part 11.7376314 magnetization 0.0542763

Broyden mixing:

rms(total) = 0.95468E-05 rms(broyden)= 0.95418E-05

rms(prec ) = 0.16991E-04

weight for this iteration 100.00

eigenvalues of (default mixing \* dielectric matrix)

average eigenvalue GAMMA= 1.6262

4.3777 2.6665 2.2188 1.8145 1.1745 0.9207 0.9207 0.8699 0.6798 0.6192

Free energy of the ion-electron system (eV)

-----

alpha Z        PSCENC =        233.50077011

Ewald energy    TEWEN =        91329.16747224

-Hartree energy DENC =   -107335.92948116

-exchange       EXHF =            0.00000000

-V(xc)+E(xc)    XCENC =        1743.80077316

PAW double counting =    52177.99493738   -52240.91476137

entropy T\*S     EENTRO =       -0.00000000

eigenvalues     EBANDS =       -5814.71943173

atomic energy   EATOM =        18704.32991668

Solvation    Ediel\_sol =        0.00000000

-----

free energy     TOTEN =       -1202.76980468 eV

energy without entropy =   -1202.76980468    energy(sigma->0) =   -1202.76980468

-----

----- Iteration 2( 12) -----

|           |          |         |           |        |
|-----------|----------|---------|-----------|--------|
| POTLOK:   | cpu time | 0.1685: | real time | 0.1871 |
| SETDIJ:   | cpu time | 0.0102: | real time | 0.0102 |
| EDDIAG:   | cpu time | 1.9230: | real time | 1.9293 |
| RMM-DIIS: | cpu time | 4.5978: | real time | 4.6228 |
| ORTHCH:   | cpu time | 0.3517: | real time | 0.3527 |
| DOS:      | cpu time | 0.0004: | real time | 0.0004 |
| CHARGE:   | cpu time | 0.5237: | real time | 0.5252 |
| MIXING:   | cpu time | 0.0079: | real time | 0.0080 |
| -----     |          |         |           |        |
| LOOP:     | cpu time | 7.5831: | real time | 7.6357 |

eigenvalue-minimisations : 1195

total energy-change (2. order) :-0.6314949E-06 (-0.1359869E-08)

number of electron 518.9999724 magnetization 0.9999998

augmentation part 11.7376324 magnetization 0.0542763

Broyden mixing:

rms(total) = 0.54234E-05 rms(broyden)= 0.54136E-05

rms( prec ) = 0.89231E-05

weight for this iteration 100.00

eigenvalues of (default mixing \* dielectric matrix)

average eigenvalue GAMMA= 1.6816

5.2514 2.7091 2.3542 1.8953 1.2622 1.0255 1.0255 0.8419 0.8419 0.6199

0.6701

Free energy of the ion-electron system (eV)

-----

alpha Z PSCENC = 233.50077011

Ewald energy TEWEN = 91329.16747224

-Hartree energy DENC = -107335.93357540

-exchange EXHF = 0.00000000

-V(xc)+E(xc) XCENC = 1743.80078645

PAW double counting = 52177.99503682 -52240.91486068

entropy T\*S EENTRO = -0.00000000

eigenvalues EBANDS = -5814.71535153

atomic energy EATOM = 18704.32991668

Solvation Ediel\_sol = 0.00000000

-----

free energy TOTEN = -1202.76980531 eV

energy without entropy = -1202.76980531 energy(sigma->0) = -1202.76980531

-----

----- Iteration 2( 13) -----

|           |          |         |           |        |
|-----------|----------|---------|-----------|--------|
| POTLOK:   | cpu time | 0.1678: | real time | 0.1932 |
| SETDIJ:   | cpu time | 0.0101: | real time | 0.0102 |
| EDDIAG:   | cpu time | 1.9196: | real time | 1.9262 |
| RMM-DIIS: | cpu time | 4.2400: | real time | 4.2578 |
| ORTHCH:   | cpu time | 0.3531: | real time | 0.3542 |
| DOS:      | cpu time | 0.0004: | real time | 0.0004 |
| CHARGE:   | cpu time | 0.5231: | real time | 0.5248 |
| MIXING:   | cpu time | 0.0080: | real time | 0.0080 |

-----

|       |          |         |           |        |
|-------|----------|---------|-----------|--------|
| LOOP: | cpu time | 7.2221: | real time | 7.2748 |
|-------|----------|---------|-----------|--------|

eigenvalue-minimisations : 1002

total energy-change (2. order) :-0.2837805E-06 (-0.3662040E-09)

number of electron      518.9999724 magnetization      0.9999998

augmentation part      11.7376323 magnetization      0.0542762

Broyden mixing:

rms(total) = 0.30415E-05      rms(broyden)= 0.30394E-05

rms(prec ) = 0.53779E-05

weight for this iteration      100.00

eigenvalues of (default mixing \* dielectric matrix)

average eigenvalue GAMMA=      1.7360

6.0236   2.7920   2.5284   1.9857   1.5709   1.0683   1.0683   0.8703   0.8703   0.7748

0.6207   0.6586

Free energy of the ion-electron system (eV)

-----

alpha Z      PSCENC =      233.50077011

Ewald energy      TEWEN =      91329.16747224

-Hartree energ DENC      =      -107335.93498881

-exchange      EXHF =      0.00000000

-V(xc)+E(xc) XCENC = 1743.80079288

PAW double counting = 52177.99511446 -52240.91493910

entropy T\*S EENTRO = -0.00000000

eigenvalues EBANDS = -5814.71394407

atomic energy EATOM = 18704.32991668

Solvation Ediel\_sol = 0.00000000

-----

free energy TOTEN = -1202.76980559 eV

energy without entropy = -1202.76980559 energy(sigma->0) = -1202.76980559

-----

----- Iteration 2( 14) -----

POTLOK: cpu time 0.1664: real time 0.1777

SETDIJ: cpu time 0.0101: real time 0.0102

|           |          |         |           |        |
|-----------|----------|---------|-----------|--------|
| EDDIAG:   | cpu time | 1.9267: | real time | 1.9332 |
| RMM-DIIS: | cpu time | 4.2924: | real time | 4.3065 |
| ORTHCH:   | cpu time | 0.3516: | real time | 0.3527 |
| DOS:      | cpu time | 0.0004: | real time | 0.0004 |
| CHARGE:   | cpu time | 0.5234: | real time | 0.5253 |
| MIXING:   | cpu time | 0.0085: | real time | 0.0085 |
| -----     |          |         |           |        |
| LOOP:     | cpu time | 7.2795: | real time | 7.3144 |

eigenvalue-minimisations : 1017

total energy-change (2. order) :-0.1640437E-06 (-0.3044374E-09)

|                    |             |               |           |
|--------------------|-------------|---------------|-----------|
| number of electron | 518.9999724 | magnetization | 0.9999998 |
| augmentation part  | 11.7376321  | magnetization | 0.0542763 |

Broyden mixing:

rms(total) = 0.22556E-05      rms(broyden)= 0.22544E-05

rms(prec ) = 0.35974E-05

weight for this iteration      100.00

eigenvalues of (default mixing \* dielectric matrix)

average eigenvalue GAMMA=      1.7838

6.7009   3.0268   2.6331   2.0662   1.7634   1.1894   1.0709   1.0709   0.8545   0.8545

0.6972 0.6220 0.6400

Free energy of the ion-electron system (eV)

-----  
alpha Z        PSCENC =        233.50077011

Ewald energy    TEWEN =        91329.16747224

-Hartree energ DENC =    -107335.93568583

-exchange       EXHF =            0.00000000

-V(xc)+E(xc)    XCENC =        1743.80079534

PAW double counting =    52177.99506715    -52240.91489231

entropy T\*S     EENTRO =        -0.00000000

eigenvalues     EBANDS =       -5814.71324914

atomic energy   EATOM =        18704.32991668

Solvation    Ediel\_sol =        0.00000000

-----  
free energy     TOTEN =        -1202.76980576 eV

energy without entropy =    -1202.76980576    energy(sigma->0) =    -1202.76980576

-----

----- Iteration 2( 15) -----

POTLOK: cpu time 0.1699: real time 0.1809  
SETDIJ: cpu time 0.0101: real time 0.0102  
EDDIAG: cpu time 1.9216: real time 1.9282  
RMM-DIIS: cpu time 4.0614: real time 4.0863  
ORTHCH: cpu time 0.3542: real time 0.3554  
DOS: cpu time 0.0003: real time 0.0003

-----

LOOP: cpu time 6.5175: real time 6.5612

eigenvalue-minimisations : 944

total energy-change (2. order) :-0.8215648E-07 (-0.1877201E-09)

number of electron 518.9999724 magnetization 0.9999998

augmentation part 11.7376321 magnetization 0.0542763

Free energy of the ion-electron system (eV)

-----

alpha Z        PSCENC =        233.50077011  
Ewald energy    TEWEN  =        91329.16747224  
  
-Hartree energ DENC    =    -107335.93596240  
  
-exchange        EXHF    =        0.00000000  
  
-V(xc)+E(xc)    XCENC  =        1743.80079460  
  
PAW double counting    =    52177.99489018    -52240.91471538  
  
entropy T\*S      EENTRO =        -0.00000000  
  
eigenvalues      EBANDS =        -5814.71297187  
  
atomic energy    EATOM  =        18704.32991668  
  
Solvation    Ediel\_sol  =        0.00000000

-----

free energy      TOTEN  =        -1202.76980584 eV

energy without entropy =    -1202.76980584    energy(sigma->0) =    -1202.76980584

-----

average (electrostatic) potential at core

the test charge radii are      0.5201   0.6991   1.0621   0.7215

(the norm of the test charge is                      1.0000)

|             |             |             |             |              |
|-------------|-------------|-------------|-------------|--------------|
| 1 -40.7525  | 2 -40.7504  | 3 -40.7517  | 4 -40.7504  | 5 -40.7524   |
| 6 -40.7546  | 7 -40.7521  | 8 -40.7599  | 9 -40.7518  | 10 -40.7596  |
| 11 -40.7532 | 12 -40.7552 | 13 -40.6495 | 14 -40.6956 | 15 -40.7691  |
| 16 -40.6977 | 17 -40.6915 | 18 -40.8662 | 19 -40.6786 | 20 -40.6668  |
| 21 -40.6882 | 22 -40.6608 | 23 -40.0822 | 24 -40.1244 | 25 -57.4585  |
| 26 -57.6696 | 27 -57.6565 | 28 -57.4684 | 29 -57.6631 | 30 -57.4585  |
| 31 -57.6694 | 32 -57.6561 | 33 -57.4664 | 34 -57.6680 | 35 -57.4593  |
| 36 -57.6713 | 37 -57.6561 | 38 -57.4686 | 39 -57.6740 | 40 -57.4584  |
| 41 -57.6754 | 42 -57.6563 | 43 -57.4734 | 44 -57.6885 | 45 -57.4584  |
| 46 -57.6743 | 47 -57.6571 | 48 -57.4739 | 49 -57.6797 | 50 -57.4595  |
| 51 -57.6710 | 52 -57.6569 | 53 -57.4714 | 54 -57.6660 | 55 -57.6363  |
| 56 -57.6623 | 57 -57.6867 | 58 -57.6829 | 59 -57.6660 | 60 -57.6689  |
| 61 -57.6897 | 62 -57.6743 | 63 -57.6366 | 64 -57.6618 | 65 -57.6888  |
| 66 -57.6945 | 67 -57.6643 | 68 -57.6687 | 69 -57.6935 | 70 -57.7007  |
| 71 -57.6361 | 72 -57.6632 | 73 -57.6965 | 74 -57.7218 | 75 -57.6651  |
| 76 -57.6693 | 77 -57.7059 | 78 -57.7520 | 79 -57.6362 | 80 -57.6658  |
| 81 -57.7102 | 82 -57.7520 | 83 -57.6684 | 84 -57.6708 | 85 -57.7370  |
| 86 -57.8415 | 87 -57.6387 | 88 -57.6665 | 89 -57.7122 | 90 -57.7166  |
| 91 -57.6731 | 92 -57.6710 | 93 -57.7423 | 94 -57.7588 | 95 -57.6370  |
| 96 -57.6646 | 97 -57.6958 | 98 -57.6902 | 99 -57.6704 | 100 -57.6698 |

|              |              |              |              |              |
|--------------|--------------|--------------|--------------|--------------|
| 101 -57.7074 | 102 -57.6856 | 103 -57.6598 | 104 -57.6304 | 105 -57.6450 |
| 106 -57.2892 | 107 -57.3875 | 108 -57.6308 | 109 -57.5969 | 110 -57.6587 |
| 111 -57.6303 | 112 -57.6418 | 113 -57.3082 | 114 -57.3932 | 115 -57.6300 |
| 116 -57.5989 | 117 -57.6580 | 118 -57.6221 | 119 -57.6982 | 120 -57.6828 |
| 121 -57.3868 | 122 -57.6288 | 123 -57.7089 | 124 -57.6589 | 125 -57.6248 |
| 126 -57.8356 | 127 -58.3295 | 128 -57.3601 | 129 -57.6341 | 130 -58.1470 |
| 131 -57.6669 | 132 -57.6341 | 133 -57.7981 | 134 -57.4165 | 135 -57.3714 |
| 136 -57.6380 | 137 -58.0758 | 138 -57.6633 | 139 -57.6299 | 140 -57.6707 |
| 141 -57.2983 | 142 -57.3777 | 143 -57.6334 | 144 -57.6476 | 145 -60.8535 |
| 146 -57.3121 | 147 -81.2845 |              |              |              |

E-fermi : -2.3010      XC(G=0): -2.7344      alpha+bet : -2.2521

spin component 1

k-point    1 :        0.0000    0.0000    0.0000

| band No. | band energies | occupation |
|----------|---------------|------------|
|----------|---------------|------------|

|   |          |         |
|---|----------|---------|
| 1 | -27.0142 | 1.00000 |
|---|----------|---------|

|   |          |         |
|---|----------|---------|
| 2 | -21.5683 | 1.00000 |
|---|----------|---------|

|    |          |         |
|----|----------|---------|
| 3  | -21.4713 | 1.00000 |
| 4  | -21.0995 | 1.00000 |
| 5  | -21.0684 | 1.00000 |
| 6  | -21.0145 | 1.00000 |
| 7  | -20.9784 | 1.00000 |
| 8  | -20.9764 | 1.00000 |
| 9  | -20.8908 | 1.00000 |
| 10 | -20.5577 | 1.00000 |
| 11 | -20.5030 | 1.00000 |
| 12 | -20.4114 | 1.00000 |
| 13 | -20.3978 | 1.00000 |
| 14 | -20.1262 | 1.00000 |
| 15 | -19.9756 | 1.00000 |
| 16 | -19.7031 | 1.00000 |
| 17 | -19.6272 | 1.00000 |
| 18 | -19.5994 | 1.00000 |
| 19 | -19.5837 | 1.00000 |
| 20 | -19.5284 | 1.00000 |
| 21 | -19.5266 | 1.00000 |
| 22 | -19.4984 | 1.00000 |
| 23 | -19.4808 | 1.00000 |
| 24 | -19.1119 | 1.00000 |

|    |          |         |
|----|----------|---------|
| 25 | -19.0749 | 1.00000 |
| 26 | -18.9782 | 1.00000 |
| 27 | -18.9646 | 1.00000 |
| 28 | -18.9004 | 1.00000 |
| 29 | -18.7332 | 1.00000 |
| 30 | -18.5044 | 1.00000 |
| 31 | -18.3589 | 1.00000 |
| 32 | -18.2751 | 1.00000 |
| 33 | -18.2519 | 1.00000 |
| 34 | -18.1836 | 1.00000 |
| 35 | -18.1809 | 1.00000 |
| 36 | -18.0796 | 1.00000 |
| 37 | -18.0757 | 1.00000 |
| 38 | -17.5611 | 1.00000 |
| 39 | -17.3131 | 1.00000 |
| 40 | -17.2874 | 1.00000 |
| 41 | -17.2825 | 1.00000 |
| 42 | -17.2097 | 1.00000 |
| 43 | -17.2033 | 1.00000 |
| 44 | -17.1767 | 1.00000 |
| 45 | -17.0224 | 1.00000 |
| 46 | -16.9501 | 1.00000 |

|    |          |         |
|----|----------|---------|
| 47 | -16.9324 | 1.00000 |
| 48 | -16.8929 | 1.00000 |
| 49 | -16.8911 | 1.00000 |
| 50 | -16.8499 | 1.00000 |
| 51 | -16.8415 | 1.00000 |
| 52 | -16.8209 | 1.00000 |
| 53 | -16.8187 | 1.00000 |
| 54 | -16.7292 | 1.00000 |
| 55 | -16.7259 | 1.00000 |
| 56 | -16.1763 | 1.00000 |
| 57 | -15.7294 | 1.00000 |
| 58 | -15.6918 | 1.00000 |
| 59 | -15.6597 | 1.00000 |
| 60 | -15.6369 | 1.00000 |
| 61 | -15.6160 | 1.00000 |
| 62 | -15.5534 | 1.00000 |
| 63 | -15.5496 | 1.00000 |
| 64 | -15.1748 | 1.00000 |
| 65 | -14.8087 | 1.00000 |
| 66 | -14.6082 | 1.00000 |
| 67 | -14.5778 | 1.00000 |
| 68 | -14.5347 | 1.00000 |

|    |          |         |
|----|----------|---------|
| 69 | -14.4981 | 1.00000 |
| 70 | -14.4684 | 1.00000 |
| 71 | -14.4421 | 1.00000 |
| 72 | -14.3336 | 1.00000 |
| 73 | -14.3055 | 1.00000 |
| 74 | -14.2795 | 1.00000 |
| 75 | -14.2720 | 1.00000 |
| 76 | -14.1822 | 1.00000 |
| 77 | -14.1784 | 1.00000 |
| 78 | -13.8890 | 1.00000 |
| 79 | -13.7599 | 1.00000 |
| 80 | -13.5932 | 1.00000 |
| 81 | -13.5482 | 1.00000 |
| 82 | -13.5292 | 1.00000 |
| 83 | -13.4975 | 1.00000 |
| 84 | -13.4455 | 1.00000 |
| 85 | -13.3639 | 1.00000 |
| 86 | -13.3453 | 1.00000 |
| 87 | -13.1889 | 1.00000 |
| 88 | -12.7863 | 1.00000 |
| 89 | -12.7592 | 1.00000 |
| 90 | -12.7277 | 1.00000 |

|     |          |         |
|-----|----------|---------|
| 91  | -12.6959 | 1.00000 |
| 92  | -12.6864 | 1.00000 |
| 93  | -12.6234 | 1.00000 |
| 94  | -12.4610 | 1.00000 |
| 95  | -12.4460 | 1.00000 |
| 96  | -12.3820 | 1.00000 |
| 97  | -12.3232 | 1.00000 |
| 98  | -12.2127 | 1.00000 |
| 99  | -12.2031 | 1.00000 |
| 100 | -12.1648 | 1.00000 |
| 101 | -11.9493 | 1.00000 |
| 102 | -11.6845 | 1.00000 |
| 103 | -11.6282 | 1.00000 |
| 104 | -11.6108 | 1.00000 |
| 105 | -11.5807 | 1.00000 |
| 106 | -11.1072 | 1.00000 |
| 107 | -11.0765 | 1.00000 |
| 108 | -10.8985 | 1.00000 |
| 109 | -10.8874 | 1.00000 |
| 110 | -10.8318 | 1.00000 |
| 111 | -10.7107 | 1.00000 |
| 112 | -10.6805 | 1.00000 |

|     |          |         |
|-----|----------|---------|
| 113 | -10.6623 | 1.00000 |
| 114 | -10.6463 | 1.00000 |
| 115 | -10.5892 | 1.00000 |
| 116 | -10.5808 | 1.00000 |
| 117 | -10.5715 | 1.00000 |
| 118 | -10.5677 | 1.00000 |
| 119 | -10.5260 | 1.00000 |
| 120 | -10.5251 | 1.00000 |
| 121 | -10.5103 | 1.00000 |
| 122 | -10.5025 | 1.00000 |
| 123 | -10.3783 | 1.00000 |
| 124 | -10.2944 | 1.00000 |
| 125 | -10.2566 | 1.00000 |
| 126 | -10.1874 | 1.00000 |
| 127 | -10.1863 | 1.00000 |
| 128 | -10.0809 | 1.00000 |
| 129 | -10.0404 | 1.00000 |
| 130 | -9.8918  | 1.00000 |
| 131 | -9.8656  | 1.00000 |
| 132 | -9.7945  | 1.00000 |
| 133 | -9.7859  | 1.00000 |
| 134 | -9.7591  | 1.00000 |

|     |         |         |
|-----|---------|---------|
| 135 | -9.6910 | 1.00000 |
| 136 | -9.4501 | 1.00000 |
| 137 | -9.4250 | 1.00000 |
| 138 | -9.3949 | 1.00000 |
| 139 | -9.3878 | 1.00000 |
| 140 | -9.3797 | 1.00000 |
| 141 | -9.3690 | 1.00000 |
| 142 | -9.3104 | 1.00000 |
| 143 | -9.3040 | 1.00000 |
| 144 | -9.3002 | 1.00000 |
| 145 | -9.2856 | 1.00000 |
| 146 | -9.2703 | 1.00000 |
| 147 | -9.0927 | 1.00000 |
| 148 | -9.0041 | 1.00000 |
| 149 | -8.9859 | 1.00000 |
| 150 | -8.9569 | 1.00000 |
| 151 | -8.9558 | 1.00000 |
| 152 | -8.7938 | 1.00000 |
| 153 | -8.7454 | 1.00000 |
| 154 | -8.7343 | 1.00000 |
| 155 | -8.7178 | 1.00000 |
| 156 | -8.7083 | 1.00000 |

|     |         |         |
|-----|---------|---------|
| 157 | -8.6868 | 1.00000 |
| 158 | -8.6779 | 1.00000 |
| 159 | -8.6681 | 1.00000 |
| 160 | -8.6535 | 1.00000 |
| 161 | -8.5943 | 1.00000 |
| 162 | -8.5824 | 1.00000 |
| 163 | -8.5758 | 1.00000 |
| 164 | -8.5674 | 1.00000 |
| 165 | -8.4876 | 1.00000 |
| 166 | -8.4571 | 1.00000 |
| 167 | -8.4356 | 1.00000 |
| 168 | -8.3450 | 1.00000 |
| 169 | -8.2972 | 1.00000 |
| 170 | -8.2750 | 1.00000 |
| 171 | -8.2631 | 1.00000 |
| 172 | -8.2328 | 1.00000 |
| 173 | -8.2318 | 1.00000 |
| 174 | -8.1511 | 1.00000 |
| 175 | -8.1447 | 1.00000 |
| 176 | -8.0769 | 1.00000 |
| 177 | -8.0443 | 1.00000 |
| 178 | -8.0259 | 1.00000 |

|     |         |         |
|-----|---------|---------|
| 179 | -8.0212 | 1.00000 |
| 180 | -7.9728 | 1.00000 |
| 181 | -7.9642 | 1.00000 |
| 182 | -7.9236 | 1.00000 |
| 183 | -7.9003 | 1.00000 |
| 184 | -7.8847 | 1.00000 |
| 185 | -7.8719 | 1.00000 |
| 186 | -7.8004 | 1.00000 |
| 187 | -7.7969 | 1.00000 |
| 188 | -7.7473 | 1.00000 |
| 189 | -7.7101 | 1.00000 |
| 190 | -7.6660 | 1.00000 |
| 191 | -7.5993 | 1.00000 |
| 192 | -7.5844 | 1.00000 |
| 193 | -7.5755 | 1.00000 |
| 194 | -7.5466 | 1.00000 |
| 195 | -7.4801 | 1.00000 |
| 196 | -7.4795 | 1.00000 |
| 197 | -7.4275 | 1.00000 |
| 198 | -7.3239 | 1.00000 |
| 199 | -7.2489 | 1.00000 |
| 200 | -7.1559 | 1.00000 |

|     |         |         |
|-----|---------|---------|
| 201 | -7.0656 | 1.00000 |
| 202 | -7.0417 | 1.00000 |
| 203 | -7.0277 | 1.00000 |
| 204 | -7.0131 | 1.00000 |
| 205 | -6.9961 | 1.00000 |
| 206 | -6.9892 | 1.00000 |
| 207 | -6.9749 | 1.00000 |
| 208 | -6.8665 | 1.00000 |
| 209 | -6.8202 | 1.00000 |
| 210 | -6.8011 | 1.00000 |
| 211 | -6.7926 | 1.00000 |
| 212 | -6.7315 | 1.00000 |
| 213 | -6.6856 | 1.00000 |
| 214 | -6.4706 | 1.00000 |
| 215 | -6.4244 | 1.00000 |
| 216 | -6.3957 | 1.00000 |
| 217 | -6.3906 | 1.00000 |
| 218 | -6.3735 | 1.00000 |
| 219 | -6.3721 | 1.00000 |
| 220 | -6.3166 | 1.00000 |
| 221 | -6.3067 | 1.00000 |
| 222 | -6.2366 | 1.00000 |

|     |         |         |
|-----|---------|---------|
| 223 | -6.2292 | 1.00000 |
| 224 | -6.2287 | 1.00000 |
| 225 | -6.0773 | 1.00000 |
| 226 | -6.0371 | 1.00000 |
| 227 | -5.7920 | 1.00000 |
| 228 | -5.7520 | 1.00000 |
| 229 | -5.6935 | 1.00000 |
| 230 | -5.6407 | 1.00000 |
| 231 | -5.6366 | 1.00000 |
| 232 | -5.5584 | 1.00000 |
| 233 | -5.5299 | 1.00000 |
| 234 | -5.4675 | 1.00000 |
| 235 | -5.4386 | 1.00000 |
| 236 | -5.1649 | 1.00000 |
| 237 | -5.0582 | 1.00000 |
| 238 | -5.0502 | 1.00000 |
| 239 | -5.0177 | 1.00000 |
| 240 | -4.9885 | 1.00000 |
| 241 | -4.9099 | 1.00000 |
| 242 | -4.8531 | 1.00000 |
| 243 | -4.8217 | 1.00000 |
| 244 | -4.7893 | 1.00000 |

|     |         |         |
|-----|---------|---------|
| 245 | -4.6802 | 1.00000 |
| 246 | -4.5721 | 1.00000 |
| 247 | -4.5708 | 1.00000 |
| 248 | -4.5051 | 1.00000 |
| 249 | -4.4451 | 1.00000 |
| 250 | -4.3833 | 1.00000 |
| 251 | -4.2924 | 1.00000 |
| 252 | -4.2651 | 1.00000 |
| 253 | -4.2123 | 1.00000 |
| 254 | -3.5574 | 1.00000 |
| 255 | -3.3541 | 1.00000 |
| 256 | -3.1998 | 1.00000 |
| 257 | -2.9389 | 1.00000 |
| 258 | -2.8479 | 1.00000 |
| 259 | -2.8231 | 1.00000 |
| 260 | -2.6060 | 1.00000 |
| 261 | -1.9082 | 0.00000 |
| 262 | -1.7672 | 0.00000 |
| 263 | -1.7183 | 0.00000 |
| 264 | -1.3434 | 0.00000 |
| 265 | -1.2946 | 0.00000 |
| 266 | -1.1841 | 0.00000 |

|     |         |         |
|-----|---------|---------|
| 267 | -0.7445 | 0.00000 |
| 268 | -0.5843 | 0.00000 |
| 269 | -0.5009 | 0.00000 |
| 270 | -0.3074 | 0.00000 |
| 271 | -0.3054 | 0.00000 |
| 272 | -0.2895 | 0.00000 |
| 273 | -0.1825 | 0.00000 |
| 274 | -0.0576 | 0.00000 |
| 275 | -0.0485 | 0.00000 |
| 276 | -0.0097 | 0.00000 |
| 277 | 0.0354  | 0.00000 |
| 278 | 0.0851  | 0.00000 |
| 279 | 0.1733  | 0.00000 |
| 280 | 0.2207  | 0.00000 |
| 281 | 0.2486  | 0.00000 |
| 282 | 0.4207  | 0.00000 |
| 283 | 0.4489  | 0.00000 |
| 284 | 0.4820  | 0.00000 |
| 285 | 0.5984  | 0.00000 |
| 286 | 0.6753  | 0.00000 |
| 287 | 0.8191  | 0.00000 |
| 288 | 0.8714  | 0.00000 |

|     |        |         |
|-----|--------|---------|
| 289 | 1.0451 | 0.00000 |
| 290 | 1.0826 | 0.00000 |
| 291 | 1.1209 | 0.00000 |
| 292 | 1.1628 | 0.00000 |
| 293 | 1.2232 | 0.00000 |
| 294 | 1.2444 | 0.00000 |
| 295 | 1.2874 | 0.00000 |
| 296 | 1.3144 | 0.00000 |
| 297 | 1.3456 | 0.00000 |
| 298 | 1.4113 | 0.00000 |
| 299 | 1.4657 | 0.00000 |
| 300 | 1.4839 | 0.00000 |
| 301 | 1.5526 | 0.00000 |
| 302 | 1.5870 | 0.00000 |
| 303 | 1.6251 | 0.00000 |
| 304 | 1.6775 | 0.00000 |
| 305 | 1.7507 | 0.00000 |
| 306 | 1.7634 | 0.00000 |
| 307 | 1.8729 | 0.00000 |
| 308 | 1.8949 | 0.00000 |
| 309 | 1.9049 | 0.00000 |
| 310 | 1.9130 | 0.00000 |

|     |        |         |
|-----|--------|---------|
| 311 | 2.1241 | 0.00000 |
| 312 | 2.1866 | 0.00000 |
| 313 | 2.2084 | 0.00000 |
| 314 | 2.2355 | 0.00000 |
| 315 | 2.2757 | 0.00000 |
| 316 | 2.2917 | 0.00000 |
| 317 | 2.3313 | 0.00000 |
| 318 | 2.3535 | 0.00000 |
| 319 | 2.3726 | 0.00000 |
| 320 | 2.3976 | 0.00000 |
| 321 | 2.4199 | 0.00000 |
| 322 | 2.4297 | 0.00000 |
| 323 | 2.4392 | 0.00000 |
| 324 | 2.4537 | 0.00000 |
| 325 | 2.4613 | 0.00000 |
| 326 | 2.5236 | 0.00000 |
| 327 | 2.5372 | 0.00000 |
| 328 | 2.7006 | 0.00000 |
| 329 | 2.7284 | 0.00000 |
| 330 | 2.7533 | 0.00000 |
| 331 | 2.7564 | 0.00000 |
| 332 | 2.7642 | 0.00000 |

|     |        |         |
|-----|--------|---------|
| 333 | 2.8140 | 0.00000 |
| 334 | 2.8345 | 0.00000 |
| 335 | 2.8583 | 0.00000 |
| 336 | 2.8911 | 0.00000 |
| 337 | 2.9242 | 0.00000 |
| 338 | 2.9464 | 0.00000 |
| 339 | 2.9783 | 0.00000 |
| 340 | 3.0049 | 0.00000 |
| 341 | 3.0340 | 0.00000 |
| 342 | 3.0442 | 0.00000 |
| 343 | 3.0661 | 0.00000 |
| 344 | 3.0851 | 0.00000 |
| 345 | 3.1496 | 0.00000 |
| 346 | 3.1625 | 0.00000 |
| 347 | 3.1795 | 0.00000 |
| 348 | 3.1922 | 0.00000 |
| 349 | 3.3000 | 0.00000 |
| 350 | 3.3228 | 0.00000 |
| 351 | 3.3512 | 0.00000 |
| 352 | 3.3673 | 0.00000 |
| 353 | 3.3893 | 0.00000 |
| 354 | 3.4328 | 0.00000 |

|     |        |         |
|-----|--------|---------|
| 355 | 3.4762 | 0.00000 |
| 356 | 3.4852 | 0.00000 |
| 357 | 3.4852 | 0.00000 |
| 358 | 3.4985 | 0.00000 |
| 359 | 3.6343 | 0.00000 |
| 360 | 3.6729 | 0.00000 |
| 361 | 3.6862 | 0.00000 |
| 362 | 3.7322 | 0.00000 |
| 363 | 3.7512 | 0.00000 |
| 364 | 3.7589 | 0.00000 |
| 365 | 3.7720 | 0.00000 |
| 366 | 3.7934 | 0.00000 |
| 367 | 3.8121 | 0.00000 |
| 368 | 3.8341 | 0.00000 |
| 369 | 3.8381 | 0.00000 |
| 370 | 3.8519 | 0.00000 |
| 371 | 3.8767 | 0.00000 |
| 372 | 3.8838 | 0.00000 |
| 373 | 3.9102 | 0.00000 |
| 374 | 3.9241 | 0.00000 |
| 375 | 3.9336 | 0.00000 |
| 376 | 3.9575 | 0.00000 |

|     |        |         |
|-----|--------|---------|
| 377 | 3.9726 | 0.00000 |
| 378 | 3.9840 | 0.00000 |
| 379 | 4.0162 | 0.00000 |
| 380 | 4.0690 | 0.00000 |
| 381 | 4.1645 | 0.00000 |
| 382 | 4.2464 | 0.00000 |
| 383 | 4.2574 | 0.00000 |
| 384 | 4.2581 | 0.00000 |
| 385 | 4.2852 | 0.00000 |
| 386 | 4.3129 | 0.00000 |
| 387 | 4.3274 | 0.00000 |
| 388 | 4.3406 | 0.00000 |
| 389 | 4.3713 | 0.00000 |
| 390 | 4.3809 | 0.00000 |
| 391 | 4.4174 | 0.00000 |
| 392 | 4.4441 | 0.00000 |
| 393 | 4.4684 | 0.00000 |
| 394 | 4.4800 | 0.00000 |
| 395 | 4.4864 | 0.00000 |
| 396 | 4.4963 | 0.00000 |
| 397 | 4.5177 | 0.00000 |
| 398 | 4.5502 | 0.00000 |

|     |        |         |
|-----|--------|---------|
| 399 | 4.5906 | 0.00000 |
| 400 | 4.6076 | 0.00000 |
| 401 | 4.6272 | 0.00000 |
| 402 | 4.6430 | 0.00000 |
| 403 | 4.6567 | 0.00000 |
| 404 | 4.6794 | 0.00000 |
| 405 | 4.7037 | 0.00000 |
| 406 | 4.7317 | 0.00000 |
| 407 | 4.7461 | 0.00000 |
| 408 | 4.7670 | 0.00000 |
| 409 | 4.7829 | 0.00000 |
| 410 | 4.7835 | 0.00000 |
| 411 | 4.7968 | 0.00000 |
| 412 | 4.8289 | 0.00000 |
| 413 | 4.8627 | 0.00000 |
| 414 | 4.8718 | 0.00000 |
| 415 | 4.8973 | 0.00000 |
| 416 | 4.9311 | 0.00000 |
| 417 | 4.9835 | 0.00000 |
| 418 | 5.0041 | 0.00000 |
| 419 | 5.0103 | 0.00000 |
| 420 | 5.0350 | 0.00000 |

|     |        |         |
|-----|--------|---------|
| 421 | 5.0392 | 0.00000 |
| 422 | 5.0649 | 0.00000 |
| 423 | 5.0819 | 0.00000 |
| 424 | 5.1142 | 0.00000 |
| 425 | 5.1170 | 0.00000 |
| 426 | 5.1365 | 0.00000 |
| 427 | 5.1408 | 0.00000 |
| 428 | 5.1540 | 0.00000 |
| 429 | 5.1751 | 0.00000 |
| 430 | 5.1849 | 0.00000 |
| 431 | 5.1879 | 0.00000 |
| 432 | 5.2154 | 0.00000 |
| 433 | 5.2353 | 0.00000 |
| 434 | 5.2407 | 0.00000 |
| 435 | 5.2558 | 0.00000 |
| 436 | 5.2895 | 0.00000 |
| 437 | 5.2956 | 0.00000 |
| 438 | 5.3090 | 0.00000 |
| 439 | 5.3315 | 0.00000 |
| 440 | 5.3491 | 0.00000 |
| 441 | 5.3671 | 0.00000 |
| 442 | 5.3729 | 0.00000 |

|     |        |         |
|-----|--------|---------|
| 443 | 5.3929 | 0.00000 |
| 444 | 5.4209 | 0.00000 |
| 445 | 5.4539 | 0.00000 |
| 446 | 5.4643 | 0.00000 |
| 447 | 5.4817 | 0.00000 |
| 448 | 5.4951 | 0.00000 |
| 449 | 5.5190 | 0.00000 |
| 450 | 5.5503 | 0.00000 |
| 451 | 5.5698 | 0.00000 |
| 452 | 5.5755 | 0.00000 |
| 453 | 5.5968 | 0.00000 |
| 454 | 5.6160 | 0.00000 |
| 455 | 5.6584 | 0.00000 |
| 456 | 5.6830 | 0.00000 |
| 457 | 5.7143 | 0.00000 |
| 458 | 5.7295 | 0.00000 |
| 459 | 5.7531 | 0.00000 |
| 460 | 5.7782 | 0.00000 |
| 461 | 5.7908 | 0.00000 |
| 462 | 5.7934 | 0.00000 |
| 463 | 5.8009 | 0.00000 |
| 464 | 5.8107 | 0.00000 |

|     |        |         |
|-----|--------|---------|
| 465 | 5.8202 | 0.00000 |
| 466 | 5.8457 | 0.00000 |
| 467 | 5.8545 | 0.00000 |
| 468 | 5.8837 | 0.00000 |
| 469 | 5.8931 | 0.00000 |
| 470 | 5.9038 | 0.00000 |
| 471 | 5.9142 | 0.00000 |
| 472 | 5.9411 | 0.00000 |
| 473 | 5.9444 | 0.00000 |
| 474 | 5.9631 | 0.00000 |
| 475 | 6.0043 | 0.00000 |
| 476 | 6.0304 | 0.00000 |
| 477 | 6.0458 | 0.00000 |
| 478 | 6.0548 | 0.00000 |
| 479 | 6.1070 | 0.00000 |
| 480 | 6.2715 | 0.00000 |

spin component 2

k-point 1 : 0.0000 0.0000 0.0000

band No. band energies occupation

1 -27.0075 1.00000

|    |          |         |
|----|----------|---------|
| 2  | -21.5671 | 1.00000 |
| 3  | -21.4697 | 1.00000 |
| 4  | -21.0977 | 1.00000 |
| 5  | -21.0675 | 1.00000 |
| 6  | -21.0118 | 1.00000 |
| 7  | -20.9770 | 1.00000 |
| 8  | -20.9746 | 1.00000 |
| 9  | -20.8803 | 1.00000 |
| 10 | -20.5547 | 1.00000 |
| 11 | -20.4996 | 1.00000 |
| 12 | -20.4003 | 1.00000 |
| 13 | -20.3881 | 1.00000 |
| 14 | -20.1221 | 1.00000 |
| 15 | -19.9524 | 1.00000 |
| 16 | -19.7004 | 1.00000 |
| 17 | -19.6260 | 1.00000 |
| 18 | -19.5973 | 1.00000 |
| 19 | -19.5773 | 1.00000 |
| 20 | -19.5271 | 1.00000 |
| 21 | -19.5248 | 1.00000 |
| 22 | -19.4758 | 1.00000 |
| 23 | -19.4613 | 1.00000 |

|    |          |         |
|----|----------|---------|
| 24 | -19.1094 | 1.00000 |
| 25 | -19.0725 | 1.00000 |
| 26 | -18.9683 | 1.00000 |
| 27 | -18.9550 | 1.00000 |
| 28 | -18.8956 | 1.00000 |
| 29 | -18.7036 | 1.00000 |
| 30 | -18.5014 | 1.00000 |
| 31 | -18.3519 | 1.00000 |
| 32 | -18.2469 | 1.00000 |
| 33 | -18.2267 | 1.00000 |
| 34 | -18.1783 | 1.00000 |
| 35 | -18.1755 | 1.00000 |
| 36 | -18.0595 | 1.00000 |
| 37 | -18.0562 | 1.00000 |
| 38 | -17.5578 | 1.00000 |
| 39 | -17.2969 | 1.00000 |
| 40 | -17.2868 | 1.00000 |
| 41 | -17.2731 | 1.00000 |
| 42 | -17.2074 | 1.00000 |
| 43 | -17.2063 | 1.00000 |
| 44 | -17.1737 | 1.00000 |
| 45 | -17.0184 | 1.00000 |

|    |          |         |
|----|----------|---------|
| 46 | -16.9412 | 1.00000 |
| 47 | -16.9220 | 1.00000 |
| 48 | -16.8704 | 1.00000 |
| 49 | -16.8693 | 1.00000 |
| 50 | -16.8291 | 1.00000 |
| 51 | -16.8226 | 1.00000 |
| 52 | -16.8176 | 1.00000 |
| 53 | -16.8152 | 1.00000 |
| 54 | -16.7308 | 1.00000 |
| 55 | -16.7248 | 1.00000 |
| 56 | -16.1736 | 1.00000 |
| 57 | -15.7287 | 1.00000 |
| 58 | -15.6569 | 1.00000 |
| 59 | -15.6432 | 1.00000 |
| 60 | -15.6208 | 1.00000 |
| 61 | -15.5663 | 1.00000 |
| 62 | -15.5275 | 1.00000 |
| 63 | -15.5248 | 1.00000 |
| 64 | -15.1711 | 1.00000 |
| 65 | -14.8065 | 1.00000 |
| 66 | -14.6060 | 1.00000 |
| 67 | -14.5602 | 1.00000 |

|    |          |         |
|----|----------|---------|
| 68 | -14.5000 | 1.00000 |
| 69 | -14.4984 | 1.00000 |
| 70 | -14.4644 | 1.00000 |
| 71 | -14.4378 | 1.00000 |
| 72 | -14.3302 | 1.00000 |
| 73 | -14.2979 | 1.00000 |
| 74 | -14.2678 | 1.00000 |
| 75 | -14.2636 | 1.00000 |
| 76 | -14.1641 | 1.00000 |
| 77 | -14.1608 | 1.00000 |
| 78 | -13.8882 | 1.00000 |
| 79 | -13.7575 | 1.00000 |
| 80 | -13.5905 | 1.00000 |
| 81 | -13.5376 | 1.00000 |
| 82 | -13.5181 | 1.00000 |
| 83 | -13.4939 | 1.00000 |
| 84 | -13.4437 | 1.00000 |
| 85 | -13.3434 | 1.00000 |
| 86 | -13.3407 | 1.00000 |
| 87 | -13.1873 | 1.00000 |
| 88 | -12.7800 | 1.00000 |
| 89 | -12.7497 | 1.00000 |

|     |          |         |
|-----|----------|---------|
| 90  | -12.7190 | 1.00000 |
| 91  | -12.6773 | 1.00000 |
| 92  | -12.6705 | 1.00000 |
| 93  | -12.6212 | 1.00000 |
| 94  | -12.4484 | 1.00000 |
| 95  | -12.4312 | 1.00000 |
| 96  | -12.3784 | 1.00000 |
| 97  | -12.3224 | 1.00000 |
| 98  | -12.2081 | 1.00000 |
| 99  | -12.1979 | 1.00000 |
| 100 | -12.1633 | 1.00000 |
| 101 | -11.9466 | 1.00000 |
| 102 | -11.6816 | 1.00000 |
| 103 | -11.6123 | 1.00000 |
| 104 | -11.5917 | 1.00000 |
| 105 | -11.5729 | 1.00000 |
| 106 | -11.1048 | 1.00000 |
| 107 | -11.0740 | 1.00000 |
| 108 | -10.8894 | 1.00000 |
| 109 | -10.8769 | 1.00000 |
| 110 | -10.8289 | 1.00000 |
| 111 | -10.7047 | 1.00000 |

|     |          |         |
|-----|----------|---------|
| 112 | -10.6793 | 1.00000 |
| 113 | -10.6593 | 1.00000 |
| 114 | -10.6414 | 1.00000 |
| 115 | -10.5812 | 1.00000 |
| 116 | -10.5738 | 1.00000 |
| 117 | -10.5687 | 1.00000 |
| 118 | -10.5648 | 1.00000 |
| 119 | -10.5153 | 1.00000 |
| 120 | -10.5145 | 1.00000 |
| 121 | -10.5012 | 1.00000 |
| 122 | -10.4965 | 1.00000 |
| 123 | -10.3775 | 1.00000 |
| 124 | -10.2934 | 1.00000 |
| 125 | -10.2557 | 1.00000 |
| 126 | -10.1840 | 1.00000 |
| 127 | -10.1828 | 1.00000 |
| 128 | -10.0689 | 1.00000 |
| 129 | -10.0348 | 1.00000 |
| 130 | -9.8890  | 1.00000 |
| 131 | -9.8635  | 1.00000 |
| 132 | -9.7868  | 1.00000 |
| 133 | -9.7768  | 1.00000 |

|     |         |         |
|-----|---------|---------|
| 134 | -9.7562 | 1.00000 |
| 135 | -9.6886 | 1.00000 |
| 136 | -9.4485 | 1.00000 |
| 137 | -9.4216 | 1.00000 |
| 138 | -9.3836 | 1.00000 |
| 139 | -9.3791 | 1.00000 |
| 140 | -9.3723 | 1.00000 |
| 141 | -9.3593 | 1.00000 |
| 142 | -9.3080 | 1.00000 |
| 143 | -9.3010 | 1.00000 |
| 144 | -9.2994 | 1.00000 |
| 145 | -9.2850 | 1.00000 |
| 146 | -9.2478 | 1.00000 |
| 147 | -9.0915 | 1.00000 |
| 148 | -9.0006 | 1.00000 |
| 149 | -8.9805 | 1.00000 |
| 150 | -8.9435 | 1.00000 |
| 151 | -8.9423 | 1.00000 |
| 152 | -8.7913 | 1.00000 |
| 153 | -8.7374 | 1.00000 |
| 154 | -8.7318 | 1.00000 |
| 155 | -8.7124 | 1.00000 |

|     |         |         |
|-----|---------|---------|
| 156 | -8.7050 | 1.00000 |
| 157 | -8.6698 | 1.00000 |
| 158 | -8.6635 | 1.00000 |
| 159 | -8.6560 | 1.00000 |
| 160 | -8.6526 | 1.00000 |
| 161 | -8.5770 | 1.00000 |
| 162 | -8.5708 | 1.00000 |
| 163 | -8.5659 | 1.00000 |
| 164 | -8.5487 | 1.00000 |
| 165 | -8.4871 | 1.00000 |
| 166 | -8.4565 | 1.00000 |
| 167 | -8.4340 | 1.00000 |
| 168 | -8.3423 | 1.00000 |
| 169 | -8.2940 | 1.00000 |
| 170 | -8.2731 | 1.00000 |
| 171 | -8.2329 | 1.00000 |
| 172 | -8.2291 | 1.00000 |
| 173 | -8.2270 | 1.00000 |
| 174 | -8.1410 | 1.00000 |
| 175 | -8.1335 | 1.00000 |
| 176 | -8.0736 | 1.00000 |
| 177 | -8.0422 | 1.00000 |

|     |         |         |
|-----|---------|---------|
| 178 | -8.0130 | 1.00000 |
| 179 | -8.0068 | 1.00000 |
| 180 | -7.9684 | 1.00000 |
| 181 | -7.9591 | 1.00000 |
| 182 | -7.9194 | 1.00000 |
| 183 | -7.8907 | 1.00000 |
| 184 | -7.8708 | 1.00000 |
| 185 | -7.8631 | 1.00000 |
| 186 | -7.7915 | 1.00000 |
| 187 | -7.7875 | 1.00000 |
| 188 | -7.7379 | 1.00000 |
| 189 | -7.6786 | 1.00000 |
| 190 | -7.6359 | 1.00000 |
| 191 | -7.5970 | 1.00000 |
| 192 | -7.5766 | 1.00000 |
| 193 | -7.5544 | 1.00000 |
| 194 | -7.5392 | 1.00000 |
| 195 | -7.4721 | 1.00000 |
| 196 | -7.4719 | 1.00000 |
| 197 | -7.4265 | 1.00000 |
| 198 | -7.3230 | 1.00000 |
| 199 | -7.2356 | 1.00000 |

|     |         |         |
|-----|---------|---------|
| 200 | -7.1528 | 1.00000 |
| 201 | -7.0550 | 1.00000 |
| 202 | -7.0360 | 1.00000 |
| 203 | -7.0154 | 1.00000 |
| 204 | -6.9851 | 1.00000 |
| 205 | -6.9770 | 1.00000 |
| 206 | -6.9719 | 1.00000 |
| 207 | -6.9405 | 1.00000 |
| 208 | -6.8628 | 1.00000 |
| 209 | -6.8159 | 1.00000 |
| 210 | -6.7949 | 1.00000 |
| 211 | -6.7874 | 1.00000 |
| 212 | -6.7248 | 1.00000 |
| 213 | -6.6762 | 1.00000 |
| 214 | -6.4673 | 1.00000 |
| 215 | -6.3945 | 1.00000 |
| 216 | -6.3825 | 1.00000 |
| 217 | -6.3779 | 1.00000 |
| 218 | -6.3627 | 1.00000 |
| 219 | -6.3381 | 1.00000 |
| 220 | -6.3029 | 1.00000 |
| 221 | -6.2752 | 1.00000 |

|     |         |         |
|-----|---------|---------|
| 222 | -6.2291 | 1.00000 |
| 223 | -6.2276 | 1.00000 |
| 224 | -6.2222 | 1.00000 |
| 225 | -6.0466 | 1.00000 |
| 226 | -6.0086 | 1.00000 |
| 227 | -5.7557 | 1.00000 |
| 228 | -5.7112 | 1.00000 |
| 229 | -5.6918 | 1.00000 |
| 230 | -5.6352 | 1.00000 |
| 231 | -5.6222 | 1.00000 |
| 232 | -5.5436 | 1.00000 |
| 233 | -5.5228 | 1.00000 |
| 234 | -5.4410 | 1.00000 |
| 235 | -5.4112 | 1.00000 |
| 236 | -5.1428 | 1.00000 |
| 237 | -5.0597 | 1.00000 |
| 238 | -5.0259 | 1.00000 |
| 239 | -5.0218 | 1.00000 |
| 240 | -4.9590 | 1.00000 |
| 241 | -4.8771 | 1.00000 |
| 242 | -4.8540 | 1.00000 |
| 243 | -4.8022 | 1.00000 |

|     |         |         |
|-----|---------|---------|
| 244 | -4.7772 | 1.00000 |
| 245 | -4.6499 | 1.00000 |
| 246 | -4.5783 | 1.00000 |
| 247 | -4.5752 | 1.00000 |
| 248 | -4.4751 | 1.00000 |
| 249 | -4.4208 | 1.00000 |
| 250 | -4.3945 | 1.00000 |
| 251 | -4.2962 | 1.00000 |
| 252 | -4.2262 | 1.00000 |
| 253 | -4.1749 | 1.00000 |
| 254 | -3.5310 | 1.00000 |
| 255 | -3.3087 | 1.00000 |
| 256 | -3.1403 | 1.00000 |
| 257 | -2.9439 | 1.00000 |
| 258 | -2.7988 | 1.00000 |
| 259 | -2.7395 | 1.00000 |
| 260 | -2.0600 | 0.00000 |
| 261 | -1.9142 | 0.00000 |
| 262 | -1.7219 | 0.00000 |
| 263 | -1.6784 | 0.00000 |
| 264 | -1.2856 | 0.00000 |
| 265 | -1.2714 | 0.00000 |

|     |         |         |
|-----|---------|---------|
| 266 | -1.1532 | 0.00000 |
| 267 | -0.7231 | 0.00000 |
| 268 | -0.5836 | 0.00000 |
| 269 | -0.5084 | 0.00000 |
| 270 | -0.2804 | 0.00000 |
| 271 | -0.2773 | 0.00000 |
| 272 | -0.2594 | 0.00000 |
| 273 | -0.1558 | 0.00000 |
| 274 | -0.0567 | 0.00000 |
| 275 | -0.0478 | 0.00000 |
| 276 | 0.0139  | 0.00000 |
| 277 | 0.0405  | 0.00000 |
| 278 | 0.0801  | 0.00000 |
| 279 | 0.2085  | 0.00000 |
| 280 | 0.2558  | 0.00000 |
| 281 | 0.2802  | 0.00000 |
| 282 | 0.4348  | 0.00000 |
| 283 | 0.4528  | 0.00000 |
| 284 | 0.4832  | 0.00000 |
| 285 | 0.6030  | 0.00000 |
| 286 | 0.6956  | 0.00000 |
| 287 | 0.8219  | 0.00000 |

|     |        |         |
|-----|--------|---------|
| 288 | 0.8783 | 0.00000 |
| 289 | 1.0522 | 0.00000 |
| 290 | 1.1023 | 0.00000 |
| 291 | 1.1428 | 0.00000 |
| 292 | 1.1772 | 0.00000 |
| 293 | 1.2318 | 0.00000 |
| 294 | 1.2505 | 0.00000 |
| 295 | 1.3085 | 0.00000 |
| 296 | 1.3201 | 0.00000 |
| 297 | 1.3595 | 0.00000 |
| 298 | 1.4302 | 0.00000 |
| 299 | 1.4784 | 0.00000 |
| 300 | 1.5014 | 0.00000 |
| 301 | 1.5770 | 0.00000 |
| 302 | 1.6033 | 0.00000 |
| 303 | 1.6535 | 0.00000 |
| 304 | 1.6863 | 0.00000 |
| 305 | 1.7581 | 0.00000 |
| 306 | 1.7736 | 0.00000 |
| 307 | 1.8769 | 0.00000 |
| 308 | 1.9004 | 0.00000 |
| 309 | 1.9082 | 0.00000 |

|     |        |         |
|-----|--------|---------|
| 310 | 1.9206 | 0.00000 |
| 311 | 2.1403 | 0.00000 |
| 312 | 2.1977 | 0.00000 |
| 313 | 2.2200 | 0.00000 |
| 314 | 2.2541 | 0.00000 |
| 315 | 2.2895 | 0.00000 |
| 316 | 2.2963 | 0.00000 |
| 317 | 2.3366 | 0.00000 |
| 318 | 2.3612 | 0.00000 |
| 319 | 2.3833 | 0.00000 |
| 320 | 2.4078 | 0.00000 |
| 321 | 2.4284 | 0.00000 |
| 322 | 2.4350 | 0.00000 |
| 323 | 2.4497 | 0.00000 |
| 324 | 2.4590 | 0.00000 |
| 325 | 2.4667 | 0.00000 |
| 326 | 2.5262 | 0.00000 |
| 327 | 2.5429 | 0.00000 |
| 328 | 2.7058 | 0.00000 |
| 329 | 2.7344 | 0.00000 |
| 330 | 2.7535 | 0.00000 |
| 331 | 2.7593 | 0.00000 |

|     |        |         |
|-----|--------|---------|
| 332 | 2.7727 | 0.00000 |
| 333 | 2.8284 | 0.00000 |
| 334 | 2.8475 | 0.00000 |
| 335 | 2.8712 | 0.00000 |
| 336 | 2.9024 | 0.00000 |
| 337 | 2.9328 | 0.00000 |
| 338 | 2.9559 | 0.00000 |
| 339 | 2.9831 | 0.00000 |
| 340 | 3.0065 | 0.00000 |
| 341 | 3.0379 | 0.00000 |
| 342 | 3.0511 | 0.00000 |
| 343 | 3.0717 | 0.00000 |
| 344 | 3.0926 | 0.00000 |
| 345 | 3.1521 | 0.00000 |
| 346 | 3.1711 | 0.00000 |
| 347 | 3.1884 | 0.00000 |
| 348 | 3.2003 | 0.00000 |
| 349 | 3.3057 | 0.00000 |
| 350 | 3.3274 | 0.00000 |
| 351 | 3.3595 | 0.00000 |
| 352 | 3.3709 | 0.00000 |
| 353 | 3.3925 | 0.00000 |

|     |        |         |
|-----|--------|---------|
| 354 | 3.4383 | 0.00000 |
| 355 | 3.4815 | 0.00000 |
| 356 | 3.4914 | 0.00000 |
| 357 | 3.4943 | 0.00000 |
| 358 | 3.5050 | 0.00000 |
| 359 | 3.6392 | 0.00000 |
| 360 | 3.6768 | 0.00000 |
| 361 | 3.6986 | 0.00000 |
| 362 | 3.7380 | 0.00000 |
| 363 | 3.7550 | 0.00000 |
| 364 | 3.7607 | 0.00000 |
| 365 | 3.7769 | 0.00000 |
| 366 | 3.7982 | 0.00000 |
| 367 | 3.8150 | 0.00000 |
| 368 | 3.8414 | 0.00000 |
| 369 | 3.8474 | 0.00000 |
| 370 | 3.8661 | 0.00000 |
| 371 | 3.8805 | 0.00000 |
| 372 | 3.8932 | 0.00000 |
| 373 | 3.9208 | 0.00000 |
| 374 | 3.9358 | 0.00000 |
| 375 | 3.9484 | 0.00000 |

|     |        |         |
|-----|--------|---------|
| 376 | 3.9593 | 0.00000 |
| 377 | 3.9828 | 0.00000 |
| 378 | 3.9866 | 0.00000 |
| 379 | 4.0221 | 0.00000 |
| 380 | 4.0783 | 0.00000 |
| 381 | 4.1709 | 0.00000 |
| 382 | 4.2596 | 0.00000 |
| 383 | 4.2617 | 0.00000 |
| 384 | 4.2686 | 0.00000 |
| 385 | 4.2929 | 0.00000 |
| 386 | 4.3210 | 0.00000 |
| 387 | 4.3340 | 0.00000 |
| 388 | 4.3499 | 0.00000 |
| 389 | 4.3812 | 0.00000 |
| 390 | 4.3858 | 0.00000 |
| 391 | 4.4233 | 0.00000 |
| 392 | 4.4481 | 0.00000 |
| 393 | 4.4735 | 0.00000 |
| 394 | 4.4833 | 0.00000 |
| 395 | 4.4928 | 0.00000 |
| 396 | 4.4990 | 0.00000 |
| 397 | 4.5211 | 0.00000 |

|     |        |         |
|-----|--------|---------|
| 398 | 4.5546 | 0.00000 |
| 399 | 4.5937 | 0.00000 |
| 400 | 4.6103 | 0.00000 |
| 401 | 4.6289 | 0.00000 |
| 402 | 4.6465 | 0.00000 |
| 403 | 4.6597 | 0.00000 |
| 404 | 4.6854 | 0.00000 |
| 405 | 4.7085 | 0.00000 |
| 406 | 4.7374 | 0.00000 |
| 407 | 4.7512 | 0.00000 |
| 408 | 4.7704 | 0.00000 |
| 409 | 4.7866 | 0.00000 |
| 410 | 4.7888 | 0.00000 |
| 411 | 4.8025 | 0.00000 |
| 412 | 4.8337 | 0.00000 |
| 413 | 4.8675 | 0.00000 |
| 414 | 4.8853 | 0.00000 |
| 415 | 4.9024 | 0.00000 |
| 416 | 4.9417 | 0.00000 |
| 417 | 4.9931 | 0.00000 |
| 418 | 5.0096 | 0.00000 |
| 419 | 5.0127 | 0.00000 |

|     |        |         |
|-----|--------|---------|
| 420 | 5.0383 | 0.00000 |
| 421 | 5.0443 | 0.00000 |
| 422 | 5.0692 | 0.00000 |
| 423 | 5.0861 | 0.00000 |
| 424 | 5.1176 | 0.00000 |
| 425 | 5.1210 | 0.00000 |
| 426 | 5.1406 | 0.00000 |
| 427 | 5.1441 | 0.00000 |
| 428 | 5.1705 | 0.00000 |
| 429 | 5.1797 | 0.00000 |
| 430 | 5.1887 | 0.00000 |
| 431 | 5.1927 | 0.00000 |
| 432 | 5.2204 | 0.00000 |
| 433 | 5.2377 | 0.00000 |
| 434 | 5.2439 | 0.00000 |
| 435 | 5.2615 | 0.00000 |
| 436 | 5.2982 | 0.00000 |
| 437 | 5.3029 | 0.00000 |
| 438 | 5.3120 | 0.00000 |
| 439 | 5.3358 | 0.00000 |
| 440 | 5.3530 | 0.00000 |
| 441 | 5.3709 | 0.00000 |

|     |        |         |
|-----|--------|---------|
| 442 | 5.3805 | 0.00000 |
| 443 | 5.3955 | 0.00000 |
| 444 | 5.4289 | 0.00000 |
| 445 | 5.4597 | 0.00000 |
| 446 | 5.4703 | 0.00000 |
| 447 | 5.4871 | 0.00000 |
| 448 | 5.4991 | 0.00000 |
| 449 | 5.5258 | 0.00000 |
| 450 | 5.5683 | 0.00000 |
| 451 | 5.5750 | 0.00000 |
| 452 | 5.5950 | 0.00000 |
| 453 | 5.6080 | 0.00000 |
| 454 | 5.6256 | 0.00000 |
| 455 | 5.6697 | 0.00000 |
| 456 | 5.6934 | 0.00000 |
| 457 | 5.7204 | 0.00000 |
| 458 | 5.7295 | 0.00000 |
| 459 | 5.7514 | 0.00000 |
| 460 | 5.7686 | 0.00000 |
| 461 | 5.7926 | 0.00000 |
| 462 | 5.7963 | 0.00000 |
| 463 | 5.8022 | 0.00000 |

|     |        |         |
|-----|--------|---------|
| 464 | 5.8121 | 0.00000 |
| 465 | 5.8248 | 0.00000 |
| 466 | 5.8339 | 0.00000 |
| 467 | 5.8666 | 0.00000 |
| 468 | 5.8747 | 0.00000 |
| 469 | 5.8894 | 0.00000 |
| 470 | 5.8986 | 0.00000 |
| 471 | 5.9009 | 0.00000 |
| 472 | 5.9150 | 0.00000 |
| 473 | 5.9462 | 0.00000 |
| 474 | 5.9571 | 0.00000 |
| 475 | 5.9755 | 0.00000 |
| 476 | 6.0044 | 0.00000 |
| 477 | 6.0307 | 0.00000 |
| 478 | 6.0909 | 0.00000 |
| 479 | 6.1220 | 0.00000 |
| 480 | 6.1916 | 0.00000 |

---

soft charge-density along one line, spin component

1

0 1 2 3 4 5 6 7

8 9

total charge-density along one line

soft charge-density along one line, spin component

2

0 1 2 3 4 5 6 7

8 9

total charge-density along one line

pseudopotential strength for first ion, spin component:

1

-2.331 -4.014 -0.002 0.000 0.000

-4.014 -6.828 -0.006 0.000 -0.000

-0.002 -0.006 -0.336 -0.000 0.000

0.000 0.000 -0.000 -0.341 -0.000

0.000 -0.000 0.000 -0.000 -0.341

pseudopotential strength for first ion, spin component:

2

-2.331 -4.014 -0.002 0.000 0.000

-4.014 -6.828 -0.006 0.000 -0.000

-0.002 -0.006 -0.336 -0.000 0.000

0.000 0.000 -0.000 -0.341 -0.000

0.000 -0.000 0.000 -0.000 -0.341

total augmentation occupancy for first ion, spin component: 1

|        |        |        |        |        |
|--------|--------|--------|--------|--------|
| 3.579  | -0.646 | 0.444  | -0.034 | -0.000 |
| -0.646 | 0.130  | -0.082 | 0.006  | 0.000  |
| 0.444  | -0.082 | 0.056  | -0.003 | -0.000 |
| -0.034 | 0.006  | -0.003 | 0.011  | 0.000  |
| -0.000 | 0.000  | -0.000 | 0.000  | 0.007  |

total augmentation occupancy for first ion, spin component: 2

|        |        |        |        |        |
|--------|--------|--------|--------|--------|
| -0.000 | 0.000  | -0.000 | 0.000  | 0.000  |
| 0.000  | -0.000 | 0.000  | -0.000 | -0.000 |
| -0.000 | 0.000  | -0.000 | -0.000 | -0.000 |
| 0.000  | -0.000 | -0.000 | -0.000 | -0.000 |
| 0.000  | -0.000 | -0.000 | -0.000 | -0.000 |

----- aborting loop because EDIFF is reached -----

total charge

| # of ion | s     | p     | d     | tot   |
|----------|-------|-------|-------|-------|
| 1        | 0.646 | 0.043 | 0.000 | 0.690 |
| 2        | 0.646 | 0.043 | 0.000 | 0.690 |
| 3        | 0.646 | 0.043 | 0.000 | 0.690 |
| 4        | 0.646 | 0.043 | 0.000 | 0.690 |
| 5        | 0.646 | 0.043 | 0.000 | 0.690 |
| 6        | 0.646 | 0.043 | 0.000 | 0.690 |
| 7        | 0.646 | 0.043 | 0.000 | 0.690 |
| 8        | 0.646 | 0.043 | 0.000 | 0.690 |
| 9        | 0.646 | 0.043 | 0.000 | 0.690 |
| 10       | 0.646 | 0.043 | 0.000 | 0.690 |
| 11       | 0.646 | 0.043 | 0.000 | 0.690 |
| 12       | 0.646 | 0.043 | 0.000 | 0.690 |
| 13       | 0.646 | 0.043 | 0.000 | 0.689 |
| 14       | 0.646 | 0.043 | 0.000 | 0.689 |
| 15       | 0.648 | 0.045 | 0.000 | 0.693 |
| 16       | 0.646 | 0.043 | 0.000 | 0.689 |
| 17       | 0.646 | 0.043 | 0.000 | 0.689 |
| 18       | 0.646 | 0.043 | 0.000 | 0.689 |
| 19       | 0.646 | 0.043 | 0.000 | 0.689 |
| 20       | 0.646 | 0.043 | 0.000 | 0.689 |

|    |       |       |       |       |
|----|-------|-------|-------|-------|
| 21 | 0.646 | 0.043 | 0.000 | 0.689 |
| 22 | 0.646 | 0.044 | 0.000 | 0.690 |
| 23 | 0.541 | 0.015 | 0.000 | 0.557 |
| 24 | 0.541 | 0.015 | 0.000 | 0.556 |
| 25 | 0.870 | 1.763 | 0.000 | 2.633 |
| 26 | 0.867 | 1.785 | 0.000 | 2.653 |
| 27 | 0.867 | 1.786 | 0.000 | 2.653 |
| 28 | 0.870 | 1.762 | 0.000 | 2.632 |
| 29 | 0.865 | 1.783 | 0.000 | 2.648 |
| 30 | 0.870 | 1.763 | 0.000 | 2.633 |
| 31 | 0.867 | 1.786 | 0.000 | 2.653 |
| 32 | 0.867 | 1.786 | 0.000 | 2.653 |
| 33 | 0.870 | 1.762 | 0.000 | 2.632 |
| 34 | 0.865 | 1.783 | 0.000 | 2.648 |
| 35 | 0.870 | 1.763 | 0.000 | 2.633 |
| 36 | 0.868 | 1.787 | 0.000 | 2.654 |
| 37 | 0.867 | 1.786 | 0.000 | 2.653 |
| 38 | 0.870 | 1.763 | 0.000 | 2.633 |
| 39 | 0.865 | 1.784 | 0.000 | 2.649 |
| 40 | 0.870 | 1.763 | 0.000 | 2.633 |
| 41 | 0.868 | 1.787 | 0.000 | 2.655 |
| 42 | 0.867 | 1.786 | 0.000 | 2.653 |

|    |       |       |       |       |
|----|-------|-------|-------|-------|
| 43 | 0.871 | 1.764 | 0.000 | 2.634 |
| 44 | 0.865 | 1.783 | 0.000 | 2.648 |
| 45 | 0.870 | 1.763 | 0.000 | 2.633 |
| 46 | 0.867 | 1.786 | 0.000 | 2.653 |
| 47 | 0.867 | 1.786 | 0.000 | 2.653 |
| 48 | 0.871 | 1.763 | 0.000 | 2.634 |
| 49 | 0.865 | 1.783 | 0.000 | 2.648 |
| 50 | 0.870 | 1.763 | 0.000 | 2.633 |
| 51 | 0.867 | 1.786 | 0.000 | 2.653 |
| 52 | 0.867 | 1.786 | 0.000 | 2.653 |
| 53 | 0.870 | 1.762 | 0.000 | 2.632 |
| 54 | 0.865 | 1.784 | 0.000 | 2.648 |
| 55 | 0.865 | 1.784 | 0.000 | 2.649 |
| 56 | 0.865 | 1.786 | 0.000 | 2.651 |
| 57 | 0.866 | 1.787 | 0.000 | 2.653 |
| 58 | 0.866 | 1.790 | 0.000 | 2.656 |
| 59 | 0.865 | 1.786 | 0.000 | 2.651 |
| 60 | 0.866 | 1.786 | 0.000 | 2.651 |
| 61 | 0.866 | 1.788 | 0.000 | 2.654 |
| 62 | 0.867 | 1.791 | 0.000 | 2.658 |
| 63 | 0.865 | 1.784 | 0.000 | 2.649 |
| 64 | 0.865 | 1.786 | 0.000 | 2.651 |

|    |       |       |       |       |
|----|-------|-------|-------|-------|
| 65 | 0.866 | 1.787 | 0.000 | 2.652 |
| 66 | 0.865 | 1.788 | 0.000 | 2.653 |
| 67 | 0.865 | 1.786 | 0.000 | 2.651 |
| 68 | 0.866 | 1.785 | 0.000 | 2.651 |
| 69 | 0.865 | 1.787 | 0.000 | 2.652 |
| 70 | 0.866 | 1.787 | 0.000 | 2.653 |
| 71 | 0.865 | 1.784 | 0.000 | 2.649 |
| 72 | 0.865 | 1.786 | 0.000 | 2.651 |
| 73 | 0.866 | 1.786 | 0.000 | 2.652 |
| 74 | 0.864 | 1.785 | 0.000 | 2.649 |
| 75 | 0.865 | 1.786 | 0.000 | 2.651 |
| 76 | 0.866 | 1.786 | 0.000 | 2.651 |
| 77 | 0.865 | 1.786 | 0.000 | 2.651 |
| 78 | 0.865 | 1.784 | 0.000 | 2.649 |
| 79 | 0.865 | 1.784 | 0.000 | 2.649 |
| 80 | 0.865 | 1.786 | 0.000 | 2.651 |
| 81 | 0.865 | 1.785 | 0.000 | 2.650 |
| 82 | 0.863 | 1.782 | 0.000 | 2.645 |
| 83 | 0.865 | 1.786 | 0.000 | 2.651 |
| 84 | 0.866 | 1.786 | 0.000 | 2.651 |
| 85 | 0.865 | 1.784 | 0.000 | 2.648 |
| 86 | 0.862 | 1.774 | 0.000 | 2.636 |

|     |       |       |       |       |
|-----|-------|-------|-------|-------|
| 87  | 0.865 | 1.784 | 0.000 | 2.649 |
| 88  | 0.865 | 1.787 | 0.000 | 2.652 |
| 89  | 0.865 | 1.785 | 0.000 | 2.650 |
| 90  | 0.865 | 1.788 | 0.000 | 2.653 |
| 91  | 0.865 | 1.786 | 0.000 | 2.651 |
| 92  | 0.866 | 1.786 | 0.000 | 2.651 |
| 93  | 0.864 | 1.783 | 0.000 | 2.647 |
| 94  | 0.866 | 1.785 | 0.000 | 2.651 |
| 95  | 0.865 | 1.784 | 0.000 | 2.649 |
| 96  | 0.865 | 1.786 | 0.000 | 2.651 |
| 97  | 0.866 | 1.787 | 0.000 | 2.653 |
| 98  | 0.866 | 1.789 | 0.000 | 2.655 |
| 99  | 0.865 | 1.786 | 0.000 | 2.651 |
| 100 | 0.866 | 1.786 | 0.000 | 2.651 |
| 101 | 0.865 | 1.787 | 0.000 | 2.652 |
| 102 | 0.867 | 1.790 | 0.000 | 2.657 |
| 103 | 0.865 | 1.786 | 0.000 | 2.651 |
| 104 | 0.867 | 1.785 | 0.000 | 2.653 |
| 105 | 0.866 | 1.786 | 0.000 | 2.652 |
| 106 | 0.870 | 1.778 | 0.000 | 2.648 |
| 107 | 0.869 | 1.765 | 0.000 | 2.635 |
| 108 | 0.865 | 1.783 | 0.000 | 2.648 |

|     |       |       |       |       |
|-----|-------|-------|-------|-------|
| 109 | 0.869 | 1.789 | 0.000 | 2.658 |
| 110 | 0.865 | 1.786 | 0.000 | 2.651 |
| 111 | 0.867 | 1.785 | 0.000 | 2.653 |
| 112 | 0.867 | 1.789 | 0.000 | 2.655 |
| 113 | 0.871 | 1.782 | 0.000 | 2.653 |
| 114 | 0.869 | 1.765 | 0.000 | 2.634 |
| 115 | 0.865 | 1.783 | 0.000 | 2.648 |
| 116 | 0.870 | 1.791 | 0.000 | 2.661 |
| 117 | 0.865 | 1.786 | 0.000 | 2.651 |
| 118 | 0.867 | 1.786 | 0.000 | 2.653 |
| 119 | 0.865 | 1.782 | 0.000 | 2.647 |
| 120 | 0.857 | 1.707 | 0.000 | 2.564 |
| 121 | 0.869 | 1.765 | 0.000 | 2.634 |
| 122 | 0.865 | 1.783 | 0.000 | 2.648 |
| 123 | 0.866 | 1.778 | 0.000 | 2.644 |
| 124 | 0.866 | 1.786 | 0.000 | 2.652 |
| 125 | 0.867 | 1.785 | 0.000 | 2.653 |
| 126 | 0.862 | 1.776 | 0.000 | 2.637 |
| 127 | 0.849 | 1.830 | 0.000 | 2.678 |
| 128 | 0.870 | 1.767 | 0.000 | 2.637 |
| 129 | 0.865 | 1.783 | 0.000 | 2.648 |
| 130 | 0.860 | 1.757 | 0.000 | 2.617 |

|     |       |       |       |       |
|-----|-------|-------|-------|-------|
| 131 | 0.866 | 1.786 | 0.000 | 2.652 |
| 132 | 0.867 | 1.784 | 0.000 | 2.652 |
| 133 | 0.864 | 1.787 | 0.000 | 2.651 |
| 134 | 0.869 | 1.790 | 0.000 | 2.659 |
| 135 | 0.869 | 1.767 | 0.000 | 2.636 |
| 136 | 0.865 | 1.783 | 0.000 | 2.648 |
| 137 | 0.866 | 1.772 | 0.000 | 2.638 |
| 138 | 0.866 | 1.786 | 0.000 | 2.652 |
| 139 | 0.867 | 1.785 | 0.000 | 2.652 |
| 140 | 0.866 | 1.788 | 0.000 | 2.654 |
| 141 | 0.870 | 1.779 | 0.000 | 2.649 |
| 142 | 0.869 | 1.766 | 0.000 | 2.635 |
| 143 | 0.865 | 1.783 | 0.000 | 2.648 |
| 144 | 0.869 | 1.790 | 0.000 | 2.659 |
| 145 | 0.942 | 1.719 | 0.000 | 2.662 |
| 146 | 1.240 | 1.546 | 0.074 | 2.860 |
| 147 | 1.634 | 3.528 | 0.000 | 5.162 |

-----

tot 123.063 221.551 0.074 344.688

magnetization (x)

| # of ion | s      | p      | d     | tot    |
|----------|--------|--------|-------|--------|
| 1        | 0.000  | -0.000 | 0.000 | 0.000  |
| 2        | -0.000 | 0.000  | 0.000 | -0.000 |
| 3        | 0.000  | -0.000 | 0.000 | 0.000  |
| 4        | -0.000 | 0.000  | 0.000 | -0.000 |
| 5        | 0.000  | -0.000 | 0.000 | 0.000  |
| 6        | -0.000 | 0.000  | 0.000 | -0.000 |
| 7        | 0.000  | -0.000 | 0.000 | 0.000  |
| 8        | -0.000 | 0.000  | 0.000 | -0.000 |
| 9        | 0.000  | -0.000 | 0.000 | 0.000  |
| 10       | -0.000 | 0.000  | 0.000 | -0.000 |
| 11       | 0.000  | -0.000 | 0.000 | 0.000  |
| 12       | -0.000 | 0.000  | 0.000 | -0.000 |
| 13       | 0.000  | -0.000 | 0.000 | 0.000  |
| 14       | -0.004 | 0.002  | 0.000 | -0.002 |
| 15       | 0.000  | -0.000 | 0.000 | 0.000  |
| 16       | -0.004 | 0.002  | 0.000 | -0.002 |
| 17       | -0.004 | 0.002  | 0.000 | -0.002 |
| 18       | 0.000  | -0.000 | 0.000 | 0.000  |

|    |        |        |       |        |
|----|--------|--------|-------|--------|
| 19 | -0.003 | 0.001  | 0.000 | -0.002 |
| 20 | 0.000  | -0.000 | 0.000 | 0.000  |
| 21 | -0.003 | 0.002  | 0.000 | -0.002 |
| 22 | -0.003 | 0.002  | 0.000 | -0.002 |
| 23 | -0.000 | 0.000  | 0.000 | -0.000 |
| 24 | -0.000 | 0.000  | 0.000 | -0.000 |
| 25 | -0.000 | -0.007 | 0.000 | -0.008 |
| 26 | -0.000 | -0.002 | 0.000 | -0.002 |
| 27 | 0.000  | 0.003  | 0.000 | 0.003  |
| 28 | 0.000  | 0.005  | 0.000 | 0.005  |
| 29 | 0.000  | 0.003  | 0.000 | 0.003  |
| 30 | -0.000 | -0.007 | 0.000 | -0.008 |
| 31 | -0.000 | -0.002 | 0.000 | -0.002 |
| 32 | 0.000  | 0.003  | 0.000 | 0.003  |
| 33 | 0.000  | 0.005  | 0.000 | 0.005  |
| 34 | 0.000  | 0.002  | 0.000 | 0.002  |
| 35 | -0.000 | -0.007 | 0.000 | -0.008 |
| 36 | -0.000 | -0.002 | 0.000 | -0.002 |
| 37 | 0.000  | 0.003  | 0.000 | 0.003  |
| 38 | 0.000  | 0.006  | 0.000 | 0.007  |
| 39 | 0.000  | 0.002  | 0.000 | 0.002  |
| 40 | -0.000 | -0.007 | 0.000 | -0.008 |

|    |        |        |       |        |
|----|--------|--------|-------|--------|
| 41 | -0.000 | -0.002 | 0.000 | -0.002 |
| 42 | 0.000  | 0.002  | 0.000 | 0.003  |
| 43 | 0.000  | 0.005  | 0.000 | 0.006  |
| 44 | 0.000  | 0.004  | 0.000 | 0.004  |
| 45 | -0.000 | -0.007 | 0.000 | -0.008 |
| 46 | -0.000 | -0.002 | 0.000 | -0.002 |
| 47 | 0.000  | 0.003  | 0.000 | 0.003  |
| 48 | 0.000  | 0.005  | 0.000 | 0.006  |
| 49 | 0.000  | 0.001  | 0.000 | 0.002  |
| 50 | -0.000 | -0.007 | 0.000 | -0.008 |
| 51 | -0.000 | -0.002 | 0.000 | -0.002 |
| 52 | 0.000  | 0.002  | 0.000 | 0.003  |
| 53 | 0.000  | 0.006  | 0.000 | 0.007  |
| 54 | 0.000  | 0.002  | 0.000 | 0.002  |
| 55 | -0.000 | -0.005 | 0.000 | -0.006 |
| 56 | -0.000 | -0.007 | 0.000 | -0.007 |
| 57 | -0.000 | -0.001 | 0.000 | -0.001 |
| 58 | -0.000 | -0.001 | 0.000 | -0.001 |
| 59 | 0.000  | 0.006  | 0.000 | 0.007  |
| 60 | 0.000  | 0.003  | 0.000 | 0.003  |
| 61 | 0.000  | 0.001  | 0.000 | 0.001  |
| 62 | 0.000  | 0.003  | 0.000 | 0.003  |

|    |        |        |       |        |
|----|--------|--------|-------|--------|
| 63 | -0.000 | -0.005 | 0.000 | -0.006 |
| 64 | -0.000 | -0.007 | 0.000 | -0.007 |
| 65 | -0.000 | -0.001 | 0.000 | -0.001 |
| 66 | -0.000 | -0.001 | 0.000 | -0.001 |
| 67 | 0.000  | 0.006  | 0.000 | 0.006  |
| 68 | 0.000  | 0.003  | 0.000 | 0.003  |
| 69 | 0.000  | 0.001  | 0.000 | 0.001  |
| 70 | 0.000  | 0.002  | 0.000 | 0.002  |
| 71 | -0.000 | -0.005 | 0.000 | -0.006 |
| 72 | -0.000 | -0.007 | 0.000 | -0.007 |
| 73 | -0.000 | -0.001 | 0.000 | -0.001 |
| 74 | -0.000 | -0.002 | 0.000 | -0.002 |
| 75 | 0.000  | 0.006  | 0.000 | 0.007  |
| 76 | 0.000  | 0.003  | 0.000 | 0.004  |
| 77 | 0.000  | 0.003  | 0.000 | 0.003  |
| 78 | 0.000  | 0.001  | 0.000 | 0.001  |
| 79 | -0.000 | -0.005 | 0.000 | -0.006 |
| 80 | -0.000 | -0.007 | 0.000 | -0.007 |
| 81 | -0.000 | -0.001 | 0.000 | -0.002 |
| 82 | -0.000 | -0.002 | 0.000 | -0.002 |
| 83 | 0.001  | 0.007  | 0.000 | 0.008  |
| 84 | 0.000  | 0.003  | 0.000 | 0.003  |

|     |        |        |       |        |
|-----|--------|--------|-------|--------|
| 85  | 0.000  | 0.002  | 0.000 | 0.002  |
| 86  | 0.000  | 0.005  | 0.000 | 0.006  |
| 87  | -0.000 | -0.005 | 0.000 | -0.005 |
| 88  | -0.000 | -0.007 | 0.000 | -0.007 |
| 89  | -0.000 | -0.001 | 0.000 | -0.002 |
| 90  | -0.000 | -0.002 | 0.000 | -0.002 |
| 91  | 0.001  | 0.008  | 0.000 | 0.008  |
| 92  | 0.000  | 0.003  | 0.000 | 0.003  |
| 93  | 0.000  | 0.002  | 0.000 | 0.003  |
| 94  | 0.000  | 0.001  | 0.000 | 0.001  |
| 95  | -0.000 | -0.005 | 0.000 | -0.006 |
| 96  | -0.000 | -0.007 | 0.000 | -0.007 |
| 97  | -0.000 | -0.001 | 0.000 | -0.001 |
| 98  | -0.000 | -0.001 | 0.000 | -0.001 |
| 99  | 0.001  | 0.007  | 0.000 | 0.007  |
| 100 | 0.000  | 0.003  | 0.000 | 0.004  |
| 101 | 0.000  | 0.003  | 0.000 | 0.003  |
| 102 | 0.000  | 0.002  | 0.000 | 0.002  |
| 103 | -0.001 | -0.010 | 0.000 | -0.011 |
| 104 | -0.003 | -0.028 | 0.000 | -0.031 |
| 105 | -0.000 | -0.001 | 0.000 | -0.002 |
| 106 | -0.000 | -0.004 | 0.000 | -0.005 |

|     |        |        |       |        |
|-----|--------|--------|-------|--------|
| 107 | 0.007  | 0.116  | 0.000 | 0.122  |
| 108 | 0.001  | 0.010  | 0.000 | 0.011  |
| 109 | 0.000  | 0.001  | 0.000 | 0.001  |
| 110 | -0.001 | -0.010 | 0.000 | -0.011 |
| 111 | -0.003 | -0.028 | 0.000 | -0.031 |
| 112 | -0.000 | -0.001 | 0.000 | -0.002 |
| 113 | -0.000 | -0.003 | 0.000 | -0.004 |
| 114 | 0.007  | 0.120  | 0.000 | 0.127  |
| 115 | 0.001  | 0.010  | 0.000 | 0.011  |
| 116 | 0.000  | 0.001  | 0.000 | 0.002  |
| 117 | -0.001 | -0.010 | 0.000 | -0.011 |
| 118 | -0.003 | -0.026 | 0.000 | -0.029 |
| 119 | -0.000 | -0.002 | 0.000 | -0.002 |
| 120 | -0.000 | -0.002 | 0.000 | -0.002 |
| 121 | 0.007  | 0.115  | 0.000 | 0.122  |
| 122 | 0.001  | 0.010  | 0.000 | 0.010  |
| 123 | 0.000  | 0.003  | 0.000 | 0.003  |
| 124 | -0.001 | -0.010 | 0.000 | -0.011 |
| 125 | -0.003 | -0.024 | 0.000 | -0.027 |
| 126 | -0.000 | -0.002 | 0.000 | -0.002 |
| 127 | -0.000 | 0.001  | 0.000 | 0.001  |
| 128 | 0.006  | 0.105  | 0.000 | 0.111  |

|       |        |        |        |        |
|-------|--------|--------|--------|--------|
| 129   | 0.001  | 0.009  | 0.000  | 0.010  |
| 130   | 0.000  | 0.004  | 0.000  | 0.004  |
| 131   | -0.001 | -0.009 | 0.000  | -0.010 |
| 132   | -0.003 | -0.024 | 0.000  | -0.027 |
| 133   | -0.000 | -0.002 | 0.000  | -0.002 |
| 134   | -0.000 | -0.002 | 0.000  | -0.002 |
| 135   | 0.006  | 0.097  | 0.000  | 0.102  |
| 136   | 0.001  | 0.009  | 0.000  | 0.010  |
| 137   | 0.000  | 0.004  | 0.000  | 0.005  |
| 138   | -0.001 | -0.010 | 0.000  | -0.011 |
| 139   | -0.003 | -0.026 | 0.000  | -0.029 |
| 140   | -0.000 | -0.002 | 0.000  | -0.002 |
| 141   | -0.000 | -0.003 | 0.000  | -0.004 |
| 142   | 0.006  | 0.105  | 0.000  | 0.111  |
| 143   | 0.001  | 0.010  | 0.000  | 0.010  |
| 144   | 0.000  | 0.002  | 0.000  | 0.003  |
| 145   | 0.000  | 0.005  | 0.000  | 0.006  |
| 146   | -0.000 | 0.000  | -0.000 | 0.000  |
| 147   | 0.000  | 0.004  | 0.000  | 0.004  |
| ----- |        |        |        |        |
| tot   | 0.001  | 0.513  | -0.000 | 0.514  |

CHARGE: cpu time 0.5249: real time 0.5267  
FORLOC: cpu time 0.0200: real time 0.0200  
FORNL : cpu time 2.0735: real time 2.0804  
STRESS: cpu time 6.2313: real time 6.2518  
FORCOR: cpu time 0.1401: real time 0.1405  
FORHAR: cpu time 0.0331: real time 0.0332  
MIXING: cpu time 0.0088: real time 0.0088  
OFIELD: cpu time 0.0001: real time 0.0001

---

DFTD3 V3.0 Rev 1

Edisp (eV) -6.61789

E6 (eV): -3.9313

E8 (eV): -2.6866

% E8 : 40.60

FORVDW: cpu time 1.8566: real time 1.8872

FORCE on cell =-STRESS in cart. coord. units (eV):

Direction XX YY ZZ XY YZ ZX

---

|                     |              |              |                 |          |             |            |
|---------------------|--------------|--------------|-----------------|----------|-------------|------------|
| Alpha Z             | 233.50077    | 233.50077    | 233.50077       |          |             |            |
| Ewald               | 107579.24971 | 23477.46510  | -39727.67744    | 7.74370  | 3455.47796  | 126.44025  |
| Hartree             | 106097.93807 | 25032.61944  | -23794.62156    | -7.53039 | 2947.26437  | 92.23252   |
| E(xc)               | -1914.24398  | -1916.59145  | -1979.90240     | 0.12713  | 1.82431     | 0.12322    |
| Local               | *****        | -53958.39074 | 57016.14852     | 2.90662  | -6360.67159 | -215.40322 |
| n-local             | -472.65576   | -482.49050   | -439.56543      | -0.61282 | -0.71870    | -0.26624   |
| augment             | -38.27908    | -38.59493    | -34.30895       | 0.02903  | -0.98329    | 0.00810    |
| Kinetic             | 7635.26017   | 7638.75065   | 8713.99126      | -3.01273 | -41.61923   | -3.14433   |
| Fock                | 0.00000      | 0.00000      | 0.00000         | 0.00000  | 0.00000     | 0.00000    |
| vdW                 | -2.64127     | -1.49211     | -6.59328        | 0.00094  | -0.07429    | 0.01123    |
| -----               |              |              |                 |          |             |            |
| Total               | -17.74472    | -15.22377    | -19.02851       | -0.34852 | 0.49954     | 0.00153    |
| in kB               | -4.89321     | -4.19804     | -5.24722        | -0.09611 | 0.13775     | 0.00042    |
| external pressure = |              | -4.78 kB     | Pullay stress = |          | 0.00 kB     |            |

VOLUME and BASIS-vectors are now :

-----

energy-cutoff : 400.00

volume of cell : 5810.14

direct lattice vectors

reciprocal lattice vectors

14.780600000 0.000000000 0.000000000 0.067656252 0.000000000 0.000000000

0.000000000 21.333900000 0.000000000 0.000000000 0.046873755 0.000000000  
0.000000000 0.000000000 18.425700000 0.000000000 0.000000000 0.054272022

length of vectors

14.780600000 21.333900000 18.425700000 0.067656252 0.046873755 0.054272022

FORCES acting on ions

electron-ion (+dipol)

ewald-force

non-local-force

convergence-correction

-----

0.428E-02 0.154E+03 0.361E+02 - .278E-02 -.160E+03 -.357E+02 -.180E-02 0.566E+01 -  
.438E+00 -.285E-06 0.232E-06 0.114E-06  
-.190E-01 0.155E+03 -.340E+02 0.166E-01 -.160E+03 0.335E+02 0.115E-02 0.565E+01  
0.541E+00 -.128E-05 -.152E-06 -.306E-06  
0.184E+00 0.154E+03 0.360E+02 -.184E+00 -.160E+03 -.356E+02 0.758E-05 0.565E+01 -  
.443E+00 -.225E-06 0.908E-06 -.770E-06  
0.112E+00 0.155E+03 -.341E+02 -.983E-01 -.160E+03 0.336E+02 -.175E-01 0.565E+01  
0.535E+00 -.579E-06 0.151E-05 -.640E-06  
0.171E+00 0.154E+03 0.362E+02 -.173E+00 -.160E+03 -.357E+02 0.116E-02 0.566E+01 -  
.440E+00 0.420E-07 0.105E-05 -.691E-06  
0.126E+00 0.154E+03 -.340E+02 -.108E+00 -.160E+03 0.334E+02 -.211E-01 0.565E+01

0.541E+00 0.663E-06 0.143E-05 -.455E-06  
-.189E-01 0.154E+03 0.363E+02 0.178E-01 -.160E+03 -.359E+02 0.159E-02 0.566E+01 -  
.431E+00 0.241E-06 0.533E-06 0.261E-06  
-.124E-01 0.154E+03 -.338E+02 0.192E-01 -.160E+03 0.332E+02 -.719E-02 0.565E+01  
0.555E+00 0.124E-05 0.369E-07 0.194E-07  
-.181E+00 0.154E+03 0.363E+02 0.182E+00 -.160E+03 -.359E+02 0.256E-03 0.566E+01 -  
.429E+00 0.235E-06 -.108E-06 0.113E-05  
-.127E+00 0.155E+03 -.337E+02 0.114E+00 -.160E+03 0.331E+02 0.109E-01 0.565E+01  
0.561E+00 0.590E-06 -.144E-05 0.336E-06  
-.174E+00 0.154E+03 0.362E+02 0.176E+00 -.160E+03 -.358E+02 -.177E-02 0.566E+01 -  
.432E+00 -.178E-07 -.260E-06 0.106E-05  
-.115E+00 0.155E+03 -.338E+02 0.958E-01 -.160E+03 0.332E+02 0.192E-01 0.565E+01  
0.555E+00 -.622E-06 -.163E-05 0.191E-06  
0.227E+01 -.150E+03 -.386E+02 -.226E+01 0.156E+03 0.386E+02 -.103E-01 -.566E+01  
0.767E-01 0.368E-06 -.254E-06 -.510E-06  
-.419E+00 -.151E+03 0.388E+02 0.420E+00 0.157E+03 -.386E+02 -.129E-02 -.567E+01 -  
.269E+00 0.979E-06 -.380E-06 0.192E-06  
0.136E+02 -.146E+03 -.413E+02 -.138E+02 0.151E+03 0.413E+02 0.257E+00 -.567E+01 -  
.349E-01 -.665E-07 -.585E-06 -.840E-06  
0.162E+01 -.151E+03 0.402E+02 -.162E+01 0.156E+03 -.400E+02 -.101E-02 -.567E+01 -  
.229E+00 0.733E-06 -.330E-06 0.458E-06  
0.352E+01 -.149E+03 0.443E+02 -.352E+01 0.155E+03 -.441E+02 -.200E-02 -.567E+01 -

.180E+00 0.239E-06 -.226E-06 0.291E-06  
-.149E+02 -.146E+03 -.329E+02 0.150E+02 0.151E+03 0.329E+02 -.979E-01 -.566E+01  
0.496E-01 -.658E-10 -.223E-05 -.164E-05  
-.297E+01 -.149E+03 0.432E+02 0.296E+01 0.155E+03 -.430E+02 0.115E-01 -.567E+01 -  
.241E+00 -.129E-05 -.400E-06 -.151E-06  
-.381E+01 -.150E+03 -.385E+02 0.381E+01 0.156E+03 0.385E+02 -.635E-02 -.566E+01  
0.241E-01 0.229E-05 -.753E-06 -.623E-06  
-.207E+01 -.151E+03 0.395E+02 0.207E+01 0.156E+03 -.392E+02 0.151E-02 -.566E+01 -  
.282E+00 -.582E-07 -.663E-06 -.312E-06  
0.250E-02 -.148E+03 0.486E+02 0.515E-02 0.154E+03 -.484E+02 -.553E-02 -.570E+01 -  
.158E+00 -.584E-06 -.687E-07 0.164E-06  
0.196E+02 -.103E+03 0.222E+02 -.212E+02 0.103E+03 -.246E+02 0.154E+01 0.138E+00  
0.238E+01 -.567E-06 -.553E-06 -.113E-05  
-.192E+02 -.103E+03 0.153E+02 0.216E+02 0.103E+03 -.168E+02 -.241E+01 -.119E+00  
0.152E+01 -.800E-06 -.408E-06 -.126E-05  
0.701E-01 0.461E+03 0.202E+03 -.733E-01 -.462E+03 -.201E+03 0.382E-02 0.102E+01 -  
.219E+00 -.601E-07 0.570E-06 -.268E-06  
0.209E+00 0.353E+03 -.234E+03 -.210E+00 -.353E+03 0.234E+03 0.264E-02 0.443E+00 -  
.370E-01 -.111E-05 0.478E-06 -.200E-05  
-.256E-01 0.351E+03 0.240E+03 0.243E-01 -.351E+03 -.241E+03 0.314E-02 0.408E+00  
0.564E-01 0.456E-06 0.574E-06 0.606E-06  
-.175E+00 0.462E+03 -.195E+03 0.181E+00 -.463E+03 0.195E+03 -.665E-02 0.105E+01

0.233E+00    -.230E-05 -.632E-06 -.180E-05  
              -.654E-01 0.210E+03 -.272E+03    0.696E-01 -.210E+03 0.272E+03    -.450E-02 0.935E-01  
0.560E-01    -.450E-06 -.928E-07 -.174E-05  
              0.561E+00 0.461E+03 0.202E+03    -.563E+00 -.462E+03 -.201E+03    0.202E-02 0.102E+01 -  
.214E+00    -.169E-06 0.198E-05 -.267E-05  
              0.106E+01 0.352E+03 -.234E+03    -.107E+01 -.353E+03 0.234E+03    0.160E-01 0.448E+00 -  
.424E-01    0.264E-07 0.153E-05 -.180E-05  
              0.411E+00 0.351E+03 0.240E+03    -.413E+00 -.351E+03 -.240E+03    0.302E-02 0.408E+00  
0.491E-01    0.350E-06 0.143E-05 -.177E-05  
              0.577E+00 0.462E+03 -.195E+03    -.582E+00 -.463E+03 0.195E+03    0.480E-02 0.105E+01  
0.235E+00    -.903E-06 0.307E-05 -.225E-05  
              0.687E+00 0.210E+03 -.272E+03    -.693E+00 -.210E+03 0.272E+03    0.614E-02 0.913E-01  
0.616E-01    0.161E-06 -.302E-06 -.171E-05  
              0.426E+00 0.461E+03 0.202E+03    -.428E+00 -.462E+03 -.202E+03    0.385E-02 0.102E+01 -  
.214E+00    -.217E-06 0.235E-05 -.244E-05  
              0.940E+00 0.352E+03 -.233E+03    -.956E+00 -.352E+03 0.233E+03    0.150E-01 0.441E+00 -  
.377E-01    0.130E-05 0.239E-06 -.123E-05  
              0.477E+00 0.351E+03 0.241E+03    -.479E+00 -.351E+03 -.241E+03    0.250E-02 0.406E+00  
0.512E-01    -.844E-07 0.198E-05 -.275E-05  
              0.705E+00 0.462E+03 -.194E+03    -.715E+00 -.463E+03 0.194E+03    0.784E-02 0.106E+01  
0.242E+00    0.134E-05 0.308E-05 -.156E-05  
              0.726E+00 0.210E+03 -.271E+03    -.735E+00 -.210E+03 0.271E+03    0.655E-02 0.910E-01

0.593E-01 0.343E-06 -.729E-06 -.148E-05  
-.180E+00 0.461E+03 0.202E+03 0.177E+00 -.462E+03 -.202E+03 0.450E-02 0.102E+01 -  
.218E+00 -.960E-07 0.129E-05 0.221E-06  
-.292E+00 0.352E+03 -.233E+03 0.296E+00 -.352E+03 0.233E+03 -.181E-02 0.440E+00 -  
.299E-01 0.111E-05 -.288E-05 -.111E-05  
0.411E-01 0.351E+03 0.241E+03 -.401E-01 -.351E+03 -.241E+03 0.224E-02 0.409E+00  
0.557E-01 -.520E-06 0.186E-05 -.146E-05  
0.519E-01 0.462E+03 -.194E+03 -.581E-01 -.463E+03 0.194E+03 0.406E-02 0.106E+01  
0.232E+00 0.237E-05 -.865E-06 -.774E-06  
-.443E-01 0.210E+03 -.271E+03 0.420E-01 -.210E+03 0.271E+03 -.181E-03 0.933E-01  
0.324E-01 0.151E-06 -.121E-05 -.156E-05  
-.550E+00 0.461E+03 0.202E+03 0.548E+00 -.462E+03 -.202E+03 0.772E-03 0.102E+01 -  
.220E+00 0.197E-06 -.254E-07 0.262E-05  
-.119E+01 0.352E+03 -.233E+03 0.120E+01 -.353E+03 0.233E+03 -.164E-01 0.447E+00 -  
.330E-01 -.169E-06 -.346E-05 -.131E-05  
-.351E+00 0.351E+03 0.241E+03 0.348E+00 -.351E+03 -.241E+03 0.207E-02 0.413E+00  
0.624E-01 -.299E-06 0.117E-05 0.824E-06  
-.410E+00 0.462E+03 -.194E+03 0.424E+00 -.463E+03 0.194E+03 -.114E-01 0.106E+01  
0.230E+00 0.916E-06 -.463E-05 -.482E-06  
-.559E+00 0.210E+03 -.271E+03 0.564E+00 -.210E+03 0.271E+03 -.954E-02 0.914E-01  
0.525E-01 -.454E-08 -.138E-05 -.166E-05  
-.475E+00 0.461E+03 0.202E+03 0.474E+00 -.462E+03 -.202E+03 0.306E-02 0.102E+01 -

.220E+00 0.292E-06 -.500E-06 0.239E-05  
-.806E+00 0.353E+03 -.234E+03 0.821E+00 -.353E+03 0.234E+03 -.150E-01 0.447E+00 -  
.393E-01 -.120E-05 -.174E-05 -.165E-05  
-.373E+00 0.351E+03 0.241E+03 0.367E+00 -.351E+03 -.241E+03 0.957E-03 0.411E+00  
0.626E-01 0.140E-06 0.462E-06 0.187E-05  
-.594E+00 0.462E+03 -.194E+03 0.607E+00 -.463E+03 0.194E+03 -.171E-01 0.105E+01  
0.234E+00 -.137E-05 -.448E-05 -.924E-06  
-.590E+00 0.210E+03 -.272E+03 0.600E+00 -.210E+03 0.272E+03 -.102E-01 0.990E-01  
0.566E-01 -.153E-06 -.641E-06 -.161E-05  
-.984E-02 0.206E+03 0.279E+03 0.132E-01 -.206E+03 -.279E+03 -.361E-02 0.686E-01 -  
.412E-01 0.780E-06 0.496E-06 -.584E-07  
0.665E+00 0.303E+02 0.296E+03 -.660E+00 -.302E+02 -.296E+03 -.468E-02 -.410E-01  
0.750E-02 0.974E-06 0.948E-07 -.568E-06  
-.849E+00 0.144E+03 -.282E+03 0.852E+00 -.144E+03 0.282E+03 -.325E-02 0.137E+00  
0.287E-01 -.866E-06 -.299E-06 -.146E-05  
0.524E+00 -.215E+02 -.285E+03 -.524E+00 0.214E+02 0.285E+03 -.657E-03 0.386E-01  
0.186E-01 -.102E-05 0.129E-06 -.163E-05  
0.496E+00 -.294E+02 0.293E+03 -.493E+00 0.294E+02 -.293E+03 -.554E-02 0.254E-01 -  
.304E-01 0.917E-06 -.194E-06 0.333E-07  
0.522E+00 0.139E+03 0.289E+03 -.522E+00 -.139E+03 -.289E+03 0.178E-02 0.103E+00 -  
.248E-01 0.842E-06 0.294E-06 -.824E-06  
-.127E+01 0.364E+02 -.287E+03 0.127E+01 -.364E+02 0.287E+03 -.162E-04 -.770E-02

0.140E-01    -.396E-06 0.128E-06 -.105E-05  
0.165E+01 -.130E+03 -.271E+03    -.167E+01 0.130E+03 0.271E+03    0.108E-01 -.880E-01  
0.372E-01    -.114E-05 0.147E-05 -.178E-05  
0.395E+00 0.207E+03 0.280E+03    -.393E+00 -.207E+03 -.280E+03    0.709E-03 0.695E-01 -  
.371E-01    0.671E-06 0.762E-06 -.164E-05  
0.916E+00 0.312E+02 0.296E+03    -.920E+00 -.311E+02 -.296E+03    0.225E-02 -.410E-01  
0.122E-01    0.581E-06 0.302E-06 -.146E-05  
0.132E+01 0.144E+03 -.282E+03    -.133E+01 -.144E+03 0.282E+03    0.498E-02 0.126E+00  
0.279E-01    -.575E-06 -.275E-06 -.178E-05  
0.341E+01 -.199E+02 -.285E+03    -.342E+01 0.199E+02 0.285E+03    0.137E-01 0.412E-01  
0.136E-01    -.755E-06 0.318E-06 -.243E-05  
0.139E+01 -.287E+02 0.294E+03    -.138E+01 0.287E+02 -.294E+03    -.349E-02 0.252E-01 -  
.307E-01    0.924E-06 0.294E-06 -.830E-06  
0.676E+00 0.139E+03 0.290E+03    -.676E+00 -.139E+03 -.290E+03    0.617E-03 0.103E+00 -  
.295E-01    0.422E-06 0.521E-06 -.199E-05  
0.159E+01 0.367E+02 -.287E+03    -.158E+01 -.366E+02 0.287E+03    -.126E-01 -.206E-01  
0.128E-01    -.103E-05 -.436E-06 -.208E-05  
0.609E+01 -.125E+03 -.271E+03    -.612E+01 0.125E+03 0.271E+03    0.223E-01 -.894E-01  
0.150E-01    -.243E-06 0.186E-05 -.252E-05  
0.366E+00 0.207E+03 0.280E+03    -.371E+00 -.207E+03 -.280E+03    0.105E-03 0.684E-01 -  
.365E-01    -.493E-09 0.992E-06 -.241E-05  
-.384E-01 0.319E+02 0.296E+03    0.298E-01 -.318E+02 -.296E+03    0.106E-01 -.362E-01

0.139E-01    -.305E-06 0.477E-06 -.165E-05  
              0.210E+01 0.144E+03 -.281E+03    -.211E+01 -.144E+03 0.281E+03    0.122E-01 0.121E+00

0.241E-01    0.378E-06 -.127E-05 -.177E-05  
              0.304E+01 -.172E+02 -.283E+03    -.306E+01 0.171E+02 0.283E+03    0.248E-01 0.891E-01

0.606E-01    0.147E-06 -.201E-06 -.169E-05  
              0.105E+01 -.272E+02 0.294E+03    -.105E+01 0.272E+02 -.294E+03    0.287E-02 0.243E-01 -

.376E-01    0.175E-06 0.610E-06 -.139E-05  
              0.962E-01 0.140E+03 0.290E+03    -.977E-01 -.140E+03 -.290E+03    0.129E-02 0.107E+00 -

.232E-01    -.355E-06 0.678E-06 -.207E-05  
              0.276E+01 0.387E+02 -.286E+03    -.277E+01 -.387E+02 0.286E+03    0.170E-02 -.103E-01

0.295E-01    0.569E-06 -.634E-06 -.207E-05  
              0.595E+01 -.115E+03 -.267E+03    -.611E+01 0.115E+03 0.267E+03    0.158E+00 0.559E-02

0.129E+00    -.116E-05 0.274E-05 -.120E-05  
              -.241E+00 0.207E+03 0.280E+03    0.239E+00 -.207E+03 -.280E+03    0.438E-02 0.716E-01 -

.387E-01    -.678E-06 0.106E-05 -.161E-05  
              -.114E+01 0.314E+02 0.294E+03    0.113E+01 -.314E+02 -.294E+03    0.919E-02 -.311E-01

0.542E-02    -.101E-05 0.382E-06 -.887E-06  
              0.599E+00 0.144E+03 -.281E+03    -.616E+00 -.144E+03 0.281E+03    0.178E-01 0.126E+00

0.437E-01    0.188E-06 -.950E-06 -.147E-05  
              -.923E+00 -.159E+02 -.286E+03    0.914E+00 0.158E+02 0.285E+03    0.616E-02 0.909E-01

0.802E-01    0.169E-05 -.177E-05 -.167E-05  
              -.642E+00 -.265E+02 0.293E+03    0.638E+00 0.265E+02 -.293E+03    0.491E-02 0.234E-01 -

.270E-01    -.732E-06 0.573E-06 -.112E-05  
              -.532E+00 0.139E+03 0.289E+03    0.528E+00 -.139E+03 -.289E+03    0.656E-02 0.114E+00 -  
.214E-01    -.776E-06 0.642E-06 -.927E-06  
              0.786E+00 0.408E+02 -.287E+03    -.798E+00 -.408E+02 0.287E+03    0.496E-02 0.236E-02 -  
.190E-01    0.198E-06 -.114E-05 -.149E-05  
              -.408E+00 -.113E+03 -.276E+03    0.379E+00 0.113E+03 0.276E+03    0.310E-01 0.604E-01 -  
.268E+00    -.545E-07 -.819E-06 -.270E-05  
              -.570E+00 0.206E+03 0.279E+03    0.568E+00 -.206E+03 -.279E+03    0.118E-02 0.720E-01 -  
.455E-01    -.693E-06 0.914E-06 -.809E-07  
              -.779E+00 0.304E+02 0.294E+03    0.783E+00 -.304E+02 -.294E+03    -.754E-02 -.309E-01 -  
.137E-02    -.689E-06 0.105E-06 0.125E-07  
              -.123E+01 0.144E+03 -.281E+03    0.124E+01 -.145E+03 0.281E+03    -.157E-01 0.123E+00  
0.505E-01    0.666E-06 -.347E-07 -.153E-05  
              -.365E+01 -.174E+02 -.283E+03    0.368E+01 0.173E+02 0.283E+03    -.307E-01 0.115E+00  
0.591E-01    0.137E-06 -.316E-06 -.146E-05  
              -.129E+01 -.277E+02 0.291E+03    0.129E+01 0.277E+02 -.291E+03    -.131E-02 0.340E-01 -  
.219E-01    -.961E-06 0.473E-07 -.409E-06  
              -.345E+00 0.139E+03 0.289E+03    0.344E+00 -.139E+03 -.289E+03    0.220E-04 0.112E+00 -  
.146E-01    -.521E-06 0.396E-06 0.253E-06  
              -.820E+00 0.400E+02 -.287E+03    0.812E+00 -.400E+02 0.287E+03    0.122E-01 -.762E-02 -  
.182E-01    0.450E-06 -.467E-06 -.139E-05  
              -.786E+01 -.119E+03 -.267E+03    0.805E+01 0.119E+03 0.267E+03    -.186E+00 -.916E-03

0.351E-01 0.271E-05 -.263E-05 -.350E-05  
-.408E+00 0.206E+03 0.279E+03 0.409E+00 -.206E+03 -.279E+03 -.281E-02 0.715E-01 -  
.464E-01 -.568E-07 0.594E-06 0.712E-06  
-.634E-01 0.300E+02 0.294E+03 0.732E-01 -.299E+02 -.294E+03 -.948E-02 -.348E-01  
0.120E-02 0.393E-06 -.718E-08 0.183E-06  
-.206E+01 0.145E+03 -.282E+03 0.208E+01 -.145E+03 0.282E+03 -.190E-01 0.132E+00  
0.256E-01 0.178E-06 -.802E-06 -.141E-05  
-.257E+01 -.208E+02 -.285E+03 0.260E+01 0.208E+02 0.285E+03 -.291E-01 0.410E-01  
0.319E-01 -.113E-06 0.430E-06 -.688E-06  
-.549E+00 -.290E+02 0.291E+03 0.554E+00 0.290E+02 -.291E+03 -.285E-02 0.292E-01 -  
.251E-01 -.235E-06 -.320E-06 0.187E-06  
0.589E-01 0.139E+03 0.289E+03 -.591E-01 -.139E+03 -.289E+03 -.353E-03 0.109E+00 -  
.208E-01 0.367E-06 0.201E-06 0.295E-06  
-.290E+01 0.378E+02 -.286E+03 0.291E+01 -.378E+02 0.286E+03 -.145E-01 -.431E-02  
0.207E-01 0.228E-06 0.267E-06 -.862E-06  
-.515E+01 -.128E+03 -.271E+03 0.520E+01 0.128E+03 0.271E+03 -.464E-01 -.862E-01  
0.375E-01 0.141E-06 0.514E-06 -.131E-05  
0.395E+00 -.137E+03 0.280E+03 -.387E+00 0.137E+03 -.280E+03 -.971E-02 -.128E+00 -  
.157E-01 0.134E-05 -.368E-06 0.371E-06  
0.192E+01 -.343E+03 0.233E+03 -.193E+01 0.344E+03 -.233E+03 0.906E-02 -.461E+00 -  
.547E-01 0.264E-05 0.108E-06 0.103E-05  
-.255E+01 -.197E+03 -.259E+03 0.256E+01 0.197E+03 0.259E+03 -.932E-02 -.198E+00

0.367E-01 0.948E-07 0.121E-05 -.138E-05  
0.688E+01 -.447E+03 -.198E+03 -.690E+01 0.448E+03 0.198E+03 0.958E-02 -.112E+01  
0.884E-01 0.159E-05 0.204E-05 -.213E-05  
-.474E+00 -.451E+03 0.204E+03 0.475E+00 0.452E+03 -.204E+03 -.212E-02 -.108E+01 -  
.113E+00 0.303E-05 -.101E-05 0.724E-06  
0.170E+01 -.203E+03 0.269E+03 -.170E+01 0.203E+03 -.269E+03 -.482E-02 -.927E-01 -  
.320E-01 0.176E-05 0.458E-07 0.399E-06  
-.214E+01 -.338E+03 -.222E+03 0.218E+01 0.338E+03 0.222E+03 -.441E-01 -.604E+00  
0.539E-01 0.161E-05 0.171E-05 -.190E-05  
0.218E+01 -.136E+03 0.282E+03 -.217E+01 0.136E+03 -.282E+03 -.636E-02 -.126E+00 -  
.944E-02 0.125E-05 0.478E-06 -.226E-06  
0.671E+01 -.339E+03 0.238E+03 -.669E+01 0.340E+03 -.238E+03 -.128E-01 -.462E+00 -  
.460E-01 0.135E-05 0.146E-05 0.791E-06  
0.676E+01 -.193E+03 -.259E+03 -.678E+01 0.193E+03 0.258E+03 0.114E-01 -.146E+00  
0.634E-01 -.711E-06 0.311E-05 -.251E-05  
0.312E+02 -.427E+03 -.198E+03 -.313E+02 0.428E+03 0.197E+03 0.725E-01 -.971E+00  
0.135E+00 -.103E-05 0.369E-05 -.225E-05  
0.543E+01 -.449E+03 0.209E+03 -.543E+01 0.450E+03 -.209E+03 0.566E-03 -.108E+01 -  
.798E-01 0.266E-05 0.102E-05 0.153E-05  
0.368E+01 -.201E+03 0.272E+03 -.367E+01 0.201E+03 -.272E+03 -.739E-03 -.977E-01 -  
.306E-01 0.107E-05 0.102E-05 -.151E-06  
0.124E+02 -.332E+03 -.223E+03 -.125E+02 0.332E+03 0.223E+03 0.121E+00 -.535E+00

0.315E-01    -.381E-06 0.420E-05 -.252E-05  
0.218E+01 -.133E+03 0.283E+03    -.219E+01 0.133E+03 -.283E+03    0.541E-03 -.128E+00 -  
.443E-02    0.297E-06 0.100E-05 -.709E-06  
0.492E+01 -.332E+03 0.245E+03    -.488E+01 0.332E+03 -.245E+03    -.319E-01 -.476E+00 -  
.375E-01    -.733E-06 0.168E-05 0.163E-06  
0.112E+02 -.182E+03 -.258E+03    -.112E+02 0.183E+03 0.258E+03    0.482E-01 -.999E-01 -  
.104E+00    0.118E-05 0.312E-05 -.125E-05  
0.316E+02 -.399E+03 -.175E+03    -.319E+02 0.401E+03 0.174E+03    0.297E+00 -.142E+01  
0.132E+01    -.285E-05 -.129E-05 -.142E-05  
0.929E+01 -.443E+03 0.219E+03    -.929E+01 0.444E+03 -.219E+03    -.565E-02 -.109E+01 -  
.481E-01    0.538E-06 0.215E-05 0.815E-06  
0.169E+01 -.196E+03 0.273E+03    -.169E+01 0.197E+03 -.273E+03    0.549E-02 -.109E+00 -  
.511E-01    -.420E-06 0.112E-05 -.427E-06  
0.171E+02 -.310E+03 -.216E+03    -.175E+02 0.310E+03 0.216E+03    0.326E+00 -.221E+00  
0.122E+00    0.176E-05 0.386E-05 -.814E-06  
-.103E+01 -.132E+03 0.281E+03    0.102E+01 0.132E+03 -.281E+03    0.103E-01 -.127E+00  
0.180E-03    -.112E-05 0.765E-06 -.650E-06  
-.511E+01 -.332E+03 0.239E+03    0.510E+01 0.332E+03 -.239E+03    0.888E-02 -.494E+00 -  
.419E-01    -.276E-05 0.719E-06 -.552E-07  
0.162E+01 -.170E+03 -.261E+03    -.173E+01 0.169E+03 0.261E+03    0.122E+00 0.383E+00 -  
.937E-01    -.273E-05 0.444E-05 -.205E-05  
-.519E+01 -.301E+03 -.189E+03    0.464E+01 0.296E+03 0.185E+03    0.672E+00 0.505E+01

0.404E+01 - .554E-05 -.251E-05 -.534E-05  
-.619E+00 -.436E+03 0.227E+03 0.617E+00 0.437E+03 -.227E+03 0.166E-02 -.120E+01 -  
.484E-01 -.204E-05 0.212E-05 0.259E-06  
-.301E+01 -.197E+03 0.268E+03 0.300E+01 0.197E+03 -.268E+03 0.146E-01 -.112E+00 -  
.427E-01 -.190E-05 0.362E-06 -.407E-06  
0.331E+01 -.281E+03 -.215E+03 -.526E+01 0.280E+03 0.214E+03 0.194E+01 0.675E+00  
0.823E+00 -.371E-05 0.576E-06 -.278E-05  
-.273E+01 -.134E+03 0.277E+03 0.273E+01 0.134E+03 -.277E+03 0.250E-02 -.123E+00 -  
.185E-01 -.141E-05 -.227E-06 -.382E-06  
-.599E+01 -.338E+03 0.230E+03 0.598E+01 0.339E+03 -.230E+03 0.113E-01 -.494E+00 -  
.460E-01 -.191E-05 -.158E-05 -.399E-06  
-.645E+01 -.171E+03 -.257E+03 0.653E+01 0.170E+03 0.257E+03 -.730E-01 0.475E+00  
0.187E-01 0.212E-07 -.425E-06 -.468E-05  
-.444E+02 -.422E+03 -.184E+03 0.450E+02 0.423E+03 0.183E+03 -.562E+00 -.109E+01  
0.649E+00 -.362E-05 -.897E-05 -.776E-05  
-.865E+01 -.441E+03 0.211E+03 0.864E+01 0.442E+03 -.211E+03 0.145E-01 -.111E+01 -  
.754E-01 -.389E-05 -.168E-06 -.361E-06  
-.292E+01 -.201E+03 0.265E+03 0.293E+01 0.201E+03 -.265E+03 -.916E-02 -.110E+00 -  
.204E-01 -.131E-05 -.106E-05 -.186E-06  
-.145E+02 -.289E+03 -.209E+03 0.164E+02 0.289E+03 0.208E+03 -.195E+01 0.575E+00  
0.791E+00 0.128E-06 0.205E-06 -.698E-05  
-.138E+01 -.136E+03 0.277E+03 0.139E+01 0.136E+03 -.277E+03 -.102E-01 -.125E+00 -

.239E-01    -.312E-06 -.911E-06 0.188E-06  
           -.279E+01 -.343E+03 0.230E+03    0.277E+01 0.343E+03 -.230E+03    0.235E-01 -.473E+00 -  
 .593E-01    0.145E-05 -.163E-05 0.118E-06  
           -.104E+02 -.189E+03 -.258E+03    0.105E+02 0.189E+03 0.258E+03    -.768E-01 -.138E+00 -  
 .534E-01    0.223E-05 -.203E-05 -.381E-05  
           -.150E+02 -.446E+03 -.196E+03    0.151E+02 0.447E+03 0.196E+03    -.703E-01 -.112E+01  
 0.101E+00    0.568E-05 -.369E-05 -.380E-05  
           -.549E+01 -.448E+03 0.204E+03    0.549E+01 0.449E+03 -.204E+03    -.484E-02 -.109E+01 -  
 .125E+00    -.273E-06 -.253E-05 -.642E-06  
           -.914E+00 -.203E+03 0.267E+03    0.923E+00 0.203E+03 -.267E+03    -.912E-02 -.102E+00 -  
 .317E-01    0.818E-06 -.102E-05 0.380E-06  
           -.164E+02 -.329E+03 -.218E+03    0.167E+02 0.329E+03 0.218E+03    -.360E+00 -.478E+00  
 0.447E-01    0.400E-05 -.370E-05 -.646E-05  
           -.715E+01 -.256E+03 -.193E+03    0.601E+01 0.248E+03 0.188E+03    0.922E+00 0.778E+01  
 0.490E+01    -.942E-05 0.318E-05 0.117E-05  
           0.529E+02 -.518E+03 -.137E+03    -.540E+02 0.522E+03 0.141E+03    0.106E+01 -.396E+01 -  
 .382E+01    -.341E-05 -.370E-05 -.378E-05  
           -.443E+02 -.586E+03 -.447E+03    0.493E+02 0.637E+03 0.481E+03    -.497E+01 -.511E+02 -  
 .344E+02    -.746E-05 0.113E-04 0.832E-05  
 -----  
           0.325E+01 0.279E+02 0.224E+02    -.327E-12 0.227E-12 0.182E-11    -.329E+01 -.279E+02 -  
 .225E+02    -.208E-04 0.193E-04 -.146E-03

POSITION

TOTAL-FORCE (eV/Angst)

-----

|          |          |         |           |           |           |
|----------|----------|---------|-----------|-----------|-----------|
| 1.24575  | 4.02870  | 5.43979 | 0.000041  | 0.001020  | -0.000406 |
| 1.21024  | 4.07581  | 8.43726 | -0.000984 | 0.002610  | -0.001139 |
| 3.70862  | 4.02890  | 5.43965 | 0.000307  | 0.001892  | -0.001092 |
| 3.67998  | 4.07733  | 8.43690 | -0.004034 | -0.000421 | -0.002910 |
| 6.17157  | 4.02854  | 5.43942 | -0.000009 | -0.000136 | -0.001750 |
| 6.14482  | 4.08292  | 8.43295 | -0.002835 | -0.003304 | -0.003193 |
| 8.63513  | 4.02801  | 5.43869 | 0.000775  | -0.000440 | -0.001998 |
| 8.60339  | 4.08732  | 8.43089 | -0.000137 | -0.001171 | -0.002214 |
| 11.09928 | 4.02784  | 5.43885 | 0.000872  | 0.001970  | -0.002714 |
| 11.06021 | 4.08619  | 8.43099 | -0.001748 | 0.000698  | -0.000655 |
| 13.56311 | 4.02807  | 5.43972 | 0.000332  | 0.001622  | -0.001618 |
| 13.52141 | 4.08047  | 8.43349 | 0.000401  | -0.002254 | 0.000286  |
| 2.44241  | 15.48073 | 8.85224 | -0.000598 | -0.005263 | 0.002322  |
| 0.01714  | 15.44624 | 5.32469 | 0.000352  | 0.001544  | -0.001197 |
| 4.86040  | 15.47728 | 8.86623 | 0.001143  | 0.000145  | -0.000606 |
| 2.48016  | 15.44854 | 5.27562 | 0.000368  | -0.001202 | -0.000502 |
| 4.94382  | 15.44925 | 5.24869 | 0.001792  | -0.002997 | 0.000305  |
| 12.31531 | 15.48242 | 9.00211 | -0.003355 | 0.004352  | -0.001236 |

|          |          |         |           |           |           |
|----------|----------|---------|-----------|-----------|-----------|
| 9.86772  | 15.44556 | 5.34176 | 0.000404  | -0.001132 | 0.000943  |
| 14.76279 | 15.48245 | 8.89951 | -0.005991 | -0.000398 | 0.005533  |
| 12.33384 | 15.44510 | 5.36128 | 0.001355  | -0.003205 | -0.001290 |
| 7.40743  | 15.44616 | 5.26463 | 0.002388  | 0.001483  | 0.001465  |
| 6.44846  | 16.34427 | 7.40648 | -0.001008 | -0.000792 | 0.003208  |
| 8.60064  | 16.47644 | 7.89249 | 0.006080  | 0.001464  | 0.006137  |
| 1.24544  | 5.11881  | 5.35500 | 0.000958  | 0.000166  | -0.002466 |
| 2.44348  | 5.83889  | 8.62292 | 0.002380  | -0.004432 | 0.001216  |
| 0.01380  | 5.79530  | 5.28573 | 0.002067  | -0.002450 | 0.000472  |
| 1.21063  | 5.16420  | 8.54151 | 0.000268  | -0.000518 | -0.001879 |
| 2.44351  | 7.27931  | 8.74832 | -0.000034 | -0.001253 | -0.000121 |
| 3.70866  | 5.11896  | 5.35390 | -0.000415 | -0.001627 | 0.000332  |
| 4.90800  | 5.84315  | 8.62123 | -0.001046 | 0.003852  | -0.000745 |
| 2.47701  | 5.79561  | 5.28397 | 0.001435  | -0.000594 | -0.002608 |
| 3.67679  | 5.16572  | 8.54000 | -0.000109 | 0.001654  | -0.000039 |
| 4.90764  | 7.28398  | 8.74777 | 0.000691  | -0.000537 | 0.001049  |
| 6.17184  | 5.11860  | 5.35433 | 0.001478  | 0.000385  | 0.000898  |
| 7.37096  | 5.84929  | 8.62094 | -0.000549 | 0.007021  | -0.002466 |
| 4.94029  | 5.79548  | 5.28340 | 0.000591  | -0.002687 | -0.001176 |
| 6.14080  | 5.17108  | 8.53715 | -0.002558 | 0.002551  | 0.002468  |
| 7.37071  | 7.28983  | 8.75132 | -0.001915 | 0.001598  | 0.000125  |
| 8.63543  | 5.11820  | 5.35521 | 0.001241  | 0.001357  | -0.001081 |

|          |          |         |           |           |           |
|----------|----------|---------|-----------|-----------|-----------|
| 9.83233  | 5.85166  | 8.62337 | 0.002659  | 0.000617  | -0.001102 |
| 7.40374  | 5.79498  | 5.28512 | 0.003455  | -0.002680 | -0.001337 |
| 8.60194  | 5.17528  | 8.53759 | -0.001887 | -0.000467 | -0.000191 |
| 9.83204  | 7.29110  | 8.75719 | -0.002112 | -0.002547 | -0.002432 |
| 11.09930 | 5.11814  | 5.35578 | -0.000867 | -0.003344 | -0.001365 |
| 12.29449 | 5.84673  | 8.62385 | 0.000108  | 0.005736  | -0.002189 |
| 9.86750  | 5.79468  | 5.28678 | -0.000754 | -0.000715 | 0.001551  |
| 11.06261 | 5.17409  | 8.53894 | 0.002649  | 0.002824  | -0.000385 |
| 12.29428 | 7.28729  | 8.75533 | -0.004446 | 0.001264  | -0.001506 |
| 13.56278 | 5.11829  | 5.35605 | 0.002656  | 0.000544  | -0.001993 |
| 14.75895 | 5.83988  | 8.62434 | -0.000206 | -0.002713 | -0.002213 |
| 12.33118 | 5.79480  | 5.28692 | -0.004506 | -0.001478 | 0.002594  |
| 13.52535 | 5.16844  | 8.54022 | -0.003520 | 0.003811  | -0.001411 |
| 14.75917 | 7.28012  | 8.75179 | 0.000938  | 0.002469  | -0.000711 |
| 0.01434  | 7.23830  | 5.19017 | 0.000095  | -0.000206 | 0.000078  |
| 1.24689  | 9.38061  | 5.13160 | 0.000551  | -0.001855 | -0.000003 |
| 1.21085  | 7.98059  | 8.79588 | -0.000925 | -0.000436 | 0.001578  |
| 2.44214  | 10.12243 | 8.87141 | -0.000839 | 0.003224  | -0.005016 |
| 0.01532  | 10.08686 | 5.14049 | -0.002048 | -0.000125 | -0.002397 |
| 1.24606  | 7.94244  | 5.15775 | 0.002002  | -0.002604 | 0.000832  |
| 1.21082  | 9.41592  | 8.85782 | -0.000786 | 0.004445  | 0.000204  |
| 2.44072  | 11.55513 | 8.88414 | -0.006571 | -0.002745 | 0.001637  |

|         |          |         |           |           |           |
|---------|----------|---------|-----------|-----------|-----------|
| 2.47747 | 7.23842  | 5.18585 | 0.002790  | 0.002881  | 0.001310  |
| 3.70997 | 9.38055  | 5.12566 | -0.001072 | -0.003009 | 0.000046  |
| 3.67534 | 7.98360  | 8.79349 | -0.000540 | 0.000972  | 0.000927  |
| 4.90487 | 10.12925 | 8.87518 | 0.000267  | -0.000292 | 0.000109  |
| 2.47867 | 10.08713 | 5.12695 | -0.002287 | 0.001510  | 0.000768  |
| 3.70939 | 7.94242  | 5.15441 | 0.000810  | -0.004003 | -0.001698 |
| 3.67589 | 9.41970  | 8.85445 | -0.001480 | 0.001957  | -0.000140 |
| 4.90263 | 11.56506 | 8.89086 | -0.000932 | 0.001278  | 0.001043  |
| 4.94085 | 7.23830  | 5.18552 | -0.004695 | 0.002258  | 0.000827  |
| 6.17318 | 9.38002  | 5.13173 | 0.002042  | 0.002090  | 0.001834  |
| 6.13864 | 7.99044  | 8.79647 | 0.002504  | -0.000392 | -0.001629 |
| 7.36780 | 10.13760 | 8.89473 | 0.000561  | 0.002854  | 0.000286  |
| 4.94196 | 10.08682 | 5.12700 | 0.004115  | 0.001483  | -0.001153 |
| 6.17284 | 7.94199  | 5.15766 | -0.000063 | 0.000558  | 0.003034  |
| 6.13939 | 9.42660  | 8.86164 | 0.000628  | -0.000046 | -0.002219 |
| 7.36410 | 11.57721 | 8.92935 | -0.001361 | 0.000040  | 0.003244  |
| 7.40426 | 7.23794  | 5.19012 | 0.002161  | 0.001767  | 0.001070  |
| 8.63700 | 9.37970  | 5.14543 | -0.000523 | 0.002956  | 0.000939  |
| 8.60086 | 7.99568  | 8.80617 | 0.001168  | -0.000698 | -0.001061 |
| 9.83068 | 10.14286 | 8.92842 | -0.002964 | 0.002355  | -0.000795 |
| 7.40553 | 10.08627 | 5.14064 | 0.001191  | -0.003591 | 0.003144  |
| 8.63637 | 7.94166  | 5.16555 | 0.002596  | 0.001775  | -0.001406 |

|          |          |         |           |           |           |
|----------|----------|---------|-----------|-----------|-----------|
| 8.60077  | 9.43254  | 8.88532 | -0.006080 | 0.002507  | -0.001209 |
| 9.82927  | 11.58244 | 9.00096 | 0.001741  | 0.003850  | 0.001037  |
| 9.86805  | 7.23787  | 5.19489 | -0.000376 | 0.000098  | -0.000215 |
| 11.10106 | 9.37979  | 5.15156 | -0.003817 | -0.001037 | 0.000670  |
| 11.06331 | 7.99411  | 8.80818 | -0.000258 | -0.001604 | 0.000136  |
| 12.29815 | 10.12943 | 8.90340 | 0.000531  | -0.000879 | 0.001578  |
| 9.86930  | 10.08593 | 5.15631 | -0.005473 | -0.001467 | 0.001410  |
| 11.10021 | 7.94175  | 5.16862 | -0.000613 | -0.003071 | 0.001393  |
| 11.06206 | 9.43062  | 8.88839 | 0.004557  | 0.001907  | 0.002010  |
| 12.30255 | 11.56557 | 8.94694 | 0.001982  | -0.003028 | -0.000593 |
| 12.33169 | 7.23799  | 5.19447 | -0.001013 | 0.000244  | -0.001756 |
| 13.56437 | 9.38021  | 5.14435 | 0.000715  | 0.001652  | -0.000578 |
| 13.52754 | 7.98555  | 8.80171 | -0.000682 | -0.002506 | -0.003157 |
| 14.76233 | 10.12320 | 8.88285 | -0.005213 | 0.000806  | -0.001712 |
| 12.33257 | 10.08637 | 5.15511 | 0.002643  | 0.000523  | -0.001539 |
| 13.56350 | 7.94214  | 5.16485 | -0.000095 | -0.000890 | -0.000371 |
| 13.52731 | 9.42040  | 8.86925 | -0.000247 | 0.002810  | -0.000472 |
| 14.76430 | 11.55727 | 8.90646 | -0.002561 | -0.000348 | 0.001434  |
| 0.01611  | 11.52516 | 5.16621 | -0.001074 | -0.002552 | 0.000393  |
| 1.24770  | 13.67535 | 5.22209 | 0.001868  | -0.002255 | -0.002478 |
| 1.21217  | 12.26335 | 8.89409 | 0.001231  | -0.000354 | 0.001231  |
| 2.43998  | 14.38728 | 8.86748 | -0.003225 | 0.000705  | 0.000773  |

|         |          |         |           |           |           |
|---------|----------|---------|-----------|-----------|-----------|
| 0.01699 | 14.35408 | 5.27295 | -0.000466 | -0.000739 | -0.001970 |
| 1.24794 | 12.22963 | 5.17275 | 0.001037  | 0.000864  | -0.001362 |
| 1.21434 | 13.70818 | 8.88771 | 0.002383  | 0.002676  | 0.003652  |
| 2.47958 | 11.52580 | 5.14547 | -0.001624 | -0.000197 | -0.001487 |
| 3.71218 | 13.67636 | 5.19535 | 0.004603  | 0.000625  | 0.001088  |
| 3.66932 | 12.26248 | 8.88184 | -0.001520 | -0.000009 | -0.000681 |
| 4.89370 | 14.38589 | 8.86075 | 0.003475  | -0.002024 | -0.001900 |
| 2.48000 | 14.35596 | 5.23149 | 0.001279  | -0.001238 | 0.001695  |
| 3.71150 | 12.23022 | 5.15602 | 0.000878  | -0.004495 | 0.001009  |
| 3.66212 | 13.70366 | 8.87117 | -0.004369 | 0.004351  | -0.000506 |
| 4.94290 | 11.52542 | 5.14351 | -0.000044 | -0.001784 | -0.001601 |
| 6.17627 | 13.67505 | 5.20032 | 0.000880  | 0.000658  | 0.000051  |
| 6.13145 | 12.27911 | 8.90591 | 0.005097  | 0.007294  | 0.004543  |
| 7.36614 | 14.42967 | 8.88203 | 0.000279  | 0.002624  | 0.002095  |
| 4.94347 | 14.35627 | 5.21375 | 0.000140  | -0.001856 | 0.001121  |
| 6.17493 | 12.22917 | 5.16623 | -0.001437 | -0.001052 | 0.001575  |
| 6.11879 | 13.72336 | 8.87765 | 0.005052  | -0.000549 | -0.001617 |
| 7.40625 | 11.52413 | 5.16368 | 0.000934  | -0.003341 | 0.000351  |
| 8.63876 | 13.67323 | 5.24377 | 0.001841  | 0.002203  | -0.001386 |
| 8.58939 | 12.29067 | 9.00208 | 0.007868  | 0.000969  | 0.000570  |
| 9.83855 | 14.39048 | 9.30305 | 0.124328  | 0.030014  | 0.019181  |
| 7.40672 | 14.35386 | 5.23530 | -0.001104 | -0.000374 | -0.000837 |

|          |          |          |           |           |           |
|----------|----------|----------|-----------|-----------|-----------|
| 8.63820  | 12.22778 | 5.19800  | 0.000300  | -0.001261 | 0.001099  |
| 8.55571  | 13.73596 | 9.04598  | -0.003791 | 0.033742  | 0.020132  |
| 9.86985  | 11.52338 | 5.18893  | 0.001757  | -0.001964 | -0.000106 |
| 11.10099 | 13.67352 | 5.27669  | 0.003165  | -0.000838 | -0.000926 |
| 11.07378 | 12.27333 | 9.00891  | 0.005784  | 0.002379  | -0.003230 |
| 12.30694 | 14.38896 | 9.00333  | 0.004106  | -0.005874 | -0.000735 |
| 9.86934  | 14.35300 | 5.29564  | 0.002859  | -0.000010 | -0.000115 |
| 11.10161 | 12.22804 | 5.21650  | -0.001121 | -0.002729 | 0.001035  |
| 11.11464 | 13.70636 | 9.07877  | -0.008515 | -0.037394 | -0.015751 |
| 12.33326 | 11.52411 | 5.18815  | -0.000912 | 0.000301  | 0.000538  |
| 13.56430 | 13.67399 | 5.25995  | 0.001586  | 0.000062  | 0.000094  |
| 13.53626 | 12.26601 | 8.93587  | -0.002051 | 0.003976  | 0.002018  |
| 14.76266 | 14.38906 | 8.90426  | -0.003853 | 0.000476  | 0.003482  |
| 12.33397 | 14.35288 | 5.30710  | 0.002778  | -0.001993 | -0.001762 |
| 13.56505 | 12.22870 | 5.20105  | 0.000074  | 0.000096  | -0.001144 |
| 13.54921 | 13.70690 | 8.94399  | 0.000545  | -0.001114 | 0.005111  |
| 9.92626  | 15.53185 | 9.99472  | -0.211795 | -0.122620 | -0.077663 |
| 7.28864  | 16.40884 | 8.69813  | 0.002159  | -0.007091 | -0.001038 |
| 10.02526 | 16.50365 | 10.64498 | 0.081920  | 0.093832  | 0.065033  |

-----

|              |  |  |           |          |           |
|--------------|--|--|-----------|----------|-----------|
| total drift: |  |  | -0.044162 | 0.024444 | -0.023016 |
|--------------|--|--|-----------|----------|-----------|

---

FREE ENERGIE OF THE ION-ELECTRON SYSTEM (eV)

---

free energy TOTEN = -1209.38769450 eV

energy without entropy= -1209.38769450 energy(sigma->0) = -1209.38769450

d Force =-0.1571278E-02[-0.318E-02, 0.344E-04] d Energy =-0.1580786E-02 0.951E-05

d Force = 0.6276743E-01[ 0.901E-01, 0.354E-01] d Ewald = 0.6273682E-01 0.306E-04

---

POTLOK: cpu time 0.1773: real time 0.1779

---

stress matrix after NEB project (eV)

-17.74472      -0.34852      0.00153

-0.34852      -15.22377      0.49954

0.00153      0.49954      -19.02851

FORCES: max atom, RMS      0.256757      0.024141

FORCE total and by dimension      0.292692      0.211795

Stress total and by dimension      30.157331      19.028513

Finite differences progress:

Degree of freedom:    1/ 6

Displacement:            1/ 2

Total:                    1/ 12

LATTYP: Found a simple orthorhombic cell.

ALAT            =    14.7806000000

B/A-ratio    =    1.2466138046

C/A-ratio    =    1.4433717170

Lattice vectors:

A1 = ( -14.7806000000,    0.0000000000,    0.0000000000)

A2 = (    0.0000000000,    0.0000000000, -18.4257000000)

A3 = ( 0.0000000000, -21.3339000000, 0.0000000000)

Analysis of symmetry for initial positions (statically):

=====

Subroutine PRICEL returns:

Original cell was already a primitive cell.

Routine SETGRP: Setting up the symmetry group for a  
simple orthorhombic supercell.

Subroutine GETGRP returns: Found 1 space group operations  
(whereof 1 operations were pure point group operations)  
out of a pool of 8 trial point group operations.

The static configuration has the point symmetry C<sub>1</sub>.

Analysis of symmetry for dynamics (positions and initial velocities):

---

---

Subroutine PRICEL returns:

Original cell was already a primitive cell.

Routine SETGRP: Setting up the symmetry group for a  
simple orthorhombic supercell.

Subroutine GETGRP returns: Found 1 space group operations

(whereof 1 operations were pure point group operations)

out of a pool of 8 trial point group operations.

The dynamic configuration has the point symmetry  $C_1$ .

Analysis of constrained symmetry for selective dynamics:

---

---

Subroutine PRICEL returns:

Original cell was already a primitive cell.

Routine SETGRP: Setting up the symmetry group for a  
simple orthorhombic supercell.

Subroutine GETGRP returns: Found 1 space group operations  
(whereof 1 operations were pure point group operations)  
out of a pool of 8 trial point group operations.

The constrained configuration has the point symmetry  $C_1$ .

Analysis of structural, dynamic, and magnetic symmetry:

=====

Subroutine PRICEL returns:

Original cell was already a primitive cell.

Routine SETGRP: Setting up the symmetry group for a  
simple orthorhombic supercell.

Subroutine GETGRP returns: Found 1 space group operations

(whereof 1 operations were pure point group operations)

out of a pool of 8 trial point group operations.

The magnetic configuration has the point symmetry  $C_1$ .

Subroutine INISYM returns: Found 1 space group operations

(whereof 1 operations are pure point group operations),

and found 1 'primitive' translations

KPOINTS: KPT-Resolved Value to Generate K-Mesh: 0

Automatic generation of k-mesh.

Space group operators:

| irotn    | det(A)   | alpha    | n_x      | n_y      | n_z      | tau_x    |
|----------|----------|----------|----------|----------|----------|----------|
| tau_y    | tau_z    |          |          |          |          |          |
| 1        | 1.000000 | 0.000000 | 1.000000 | 0.000000 | 0.000000 | 0.000000 |
| 0.000000 | 0.000000 |          |          |          |          |          |

Subroutine IBZKPT returns following result:

=====

Found 1 irreducible k-points:

Following reciprocal coordinates:

| Coordinates |          |          | Weight   |
|-------------|----------|----------|----------|
| 0.000000    | 0.000000 | 0.000000 | 1.000000 |

Following cartesian coordinates:

| Coordinates |          |          | Weight   |
|-------------|----------|----------|----------|
| 0.000000    | 0.000000 | 0.000000 | 1.000000 |

WAVPRE: cpu time 0.1261: real time 0.1524

FEWALD: cpu time 0.0027: real time 0.0027

ORTHCH: cpu time 0.9988: real time 1.0024

LOOP+: cpu time 139.8593: real time 140.6961

----- Iteration 3( 1) -----

|           |          |          |           |         |
|-----------|----------|----------|-----------|---------|
| POTLOK:   | cpu time | 0.1710:  | real time | 0.1817  |
| SETDIJ:   | cpu time | 0.0100:  | real time | 0.0100  |
| EDDIAG:   | cpu time | 1.9259:  | real time | 1.9322  |
| RMM-DIIS: | cpu time | 7.1062:  | real time | 7.1411  |
| ORTHCH:   | cpu time | 0.3532:  | real time | 0.3546  |
| DOS:      | cpu time | 0.0004:  | real time | 0.0004  |
| CHARGE:   | cpu time | 0.5254:  | real time | 0.5274  |
| MIXING:   | cpu time | 0.0041:  | real time | 0.0042  |
| -----     |          |          |           |         |
| LOOP:     | cpu time | 10.0962: | real time | 10.1516 |

eigenvalue-minimisations : 1926

total energy-change (2. order) : 0.1071462E-02 (-0.1737306E+00)

number of electron      518.9999724 magnetization      0.9999998

augmentation part      11.7369393 magnetization      0.0542611

Broyden mixing:

rms(total) = 0.31450E-01      rms(broyden)= 0.31133E-01

rms(prec ) = 0.32034E-01

weight for this iteration      100.00

Free energy of the ion-electron system (eV)

-----

alpha Z        PSCENC =        233.50077011

Ewald energy    TEWEN =        91329.23845853

-Hartree energy DENC =    -107336.19594189

-exchange       EXHF =            0.00000000

-V(xc)+E(xc)    XCENC =        1743.79571325

PAW double counting =    52177.99462844    -52240.91445342

entropy T\*S     EENTRO =        -0.00000000

eigenvalues     EBANDS =       -5814.51782601

atomic energy   EATOM =        18704.32991668

Solvation    Ediel\_sol =        0.00000000

-----

free energy     TOTEN =       -1202.76873429 eV

energy without entropy =    -1202.76873429    energy(sigma->0) =    -1202.76873429

-----

----- Iteration 3( 2) -----

|           |          |         |           |        |
|-----------|----------|---------|-----------|--------|
| POTLOK:   | cpu time | 0.1695: | real time | 0.1859 |
| SETDIJ:   | cpu time | 0.0101: | real time | 0.0101 |
| EDDIAG:   | cpu time | 1.9220: | real time | 1.9288 |
| RMM-DIIS: | cpu time | 7.1130: | real time | 7.1459 |
| ORTHCH:   | cpu time | 0.3571: | real time | 0.3582 |
| DOS:      | cpu time | 0.0004: | real time | 0.0004 |
| CHARGE:   | cpu time | 0.5285: | real time | 0.5305 |
| MIXING:   | cpu time | 0.0041: | real time | 0.0041 |

-----

|       |          |          |           |         |
|-------|----------|----------|-----------|---------|
| LOOP: | cpu time | 10.1046: | real time | 10.1639 |
|-------|----------|----------|-----------|---------|

eigenvalue-minimisations : 1920

total energy-change (2. order) :-0.1204141E-02 (-0.1752344E-02)

|                    |             |               |           |
|--------------------|-------------|---------------|-----------|
| number of electron | 518.9999724 | magnetization | 0.9999998 |
|--------------------|-------------|---------------|-----------|

|                   |            |               |           |
|-------------------|------------|---------------|-----------|
| augmentation part | 11.7356168 | magnetization | 0.0542644 |
|-------------------|------------|---------------|-----------|

Broyden mixing:

|                          |                           |
|--------------------------|---------------------------|
| rms(total) = 0.18632E-01 | rms(broyden)= 0.18599E-01 |
|--------------------------|---------------------------|

rms(prec ) = 0.19331E-01

weight for this iteration      100.00

eigenvalues of (default mixing \* dielectric matrix)

average eigenvalue GAMMA=    1.3448

1.3448

Free energy of the ion-electron system (eV)

-----  
alpha Z          PSCENC =          233.50077011

Ewald energy    TEWEN   =          91329.23845853

-Hartree energ DENC   =   -107336.11104457

-exchange       EXHF     =          0.00000000

-V(xc)+E(xc)    XCENC   =          1743.79504063

PAW double counting   =    52176.83471691   -52239.75364393

entropy T\*S     EENTRO =          -0.00000000

eigenvalues     EBANDS =          -5814.60415280

atomic energy   EATOM   =          18704.32991668

Solvation    Ediel\_sol   =          0.00000000

-----  
free energy      TOTEN   =          -1202.76993844 eV

energy without entropy = -1202.76993844 energy(sigma->0) = -1202.76993844

-----

----- Iteration 3( 3) -----

|           |          |          |           |         |
|-----------|----------|----------|-----------|---------|
| POTLOK:   | cpu time | 0.1697:  | real time | 0.1706  |
| SETDIJ:   | cpu time | 0.0101:  | real time | 0.0102  |
| EDDIAG:   | cpu time | 1.9254:  | real time | 1.9315  |
| RMM-DIIS: | cpu time | 7.1618:  | real time | 7.1829  |
| ORTHCH:   | cpu time | 0.3527:  | real time | 0.3536  |
| DOS:      | cpu time | 0.0004:  | real time | 0.0004  |
| CHARGE:   | cpu time | 0.5290:  | real time | 0.5305  |
| MIXING:   | cpu time | 0.0046:  | real time | 0.0046  |
| -----     |          |          |           |         |
| LOOP:     | cpu time | 10.1537: | real time | 10.1843 |

eigenvalue-minimisations : 1938

total energy-change (2. order) : 0.6142153E-04 (-0.9674131E-04)

number of electron      518.9999724 magnetization      0.9999998

augmentation part      11.7371533 magnetization      0.0542693

Broyden mixing:

rms(total) = 0.89295E-02      rms(broyden)= 0.89245E-02

rms(prec ) = 0.92532E-02

weight for this iteration      100.00

eigenvalues of (default mixing \* dielectric matrix)

average eigenvalue GAMMA=      1.4396

0.6837    2.1955

Free energy of the ion-electron system (eV)

-----

alpha Z      PSCENC =      233.50077011

Ewald energy    TEWEN =      91329.23845853

-Hartree energ DENC =    -107335.95073222

-exchange      EXHF =      0.00000000

-V(xc)+E(xc)    XCENC =      1743.78726345

PAW double counting =      52175.69830551    -52238.61483394

entropy T\*S    EENTRO =        -0.00000000

eigenvalues    EBANDS =        -5814.75902513

atomic energy  EATOM  =        18704.32991668

Solvation    Ediel\_sol  =        0.00000000

-----  
free energy    TOTEN  =        -1202.76987701 eV

energy without entropy =    -1202.76987701    energy(sigma->0) =    -1202.76987701

-----  
----- Iteration        3( 4) -----

POTLOK:    cpu time    0.1665: real time    0.1969

SETDIJ:    cpu time    0.0101: real time    0.0101

EDDIAG:    cpu time    1.9233: real time    1.9297

RMM-DIIS:    cpu time    7.1976: real time    7.2287

ORTHCH: cpu time 0.3544: real time 0.3554

DOS: cpu time 0.0004: real time 0.0004

CHARGE: cpu time 0.5279: real time 0.5298

MIXING: cpu time 0.0050: real time 0.0050

-----

LOOP: cpu time 10.1852: real time 10.2560

eigenvalue-minimisations : 1931

total energy-change (2. order) :-0.5861691E-04 (-0.1259898E-04)

number of electron 518.9999724 magnetization 0.9999998

augmentation part 11.7368151 magnetization 0.0542705

Broyden mixing:

rms(total) = 0.30786E-02 rms(broyden)= 0.30773E-02

rms( prec ) = 0.33603E-02

weight for this iteration 100.00

eigenvalues of (default mixing \* dielectric matrix)

average eigenvalue GAMMA= 1.3263

2.3462 0.8163 0.8163

Free energy of the ion-electron system (eV)

---

alpha Z        PSCENC =        233.50077011

Ewald energy    TEWEN =        91329.23845853

-Hartree energ DENC =    -107335.88536523

-exchange       EXHF =            0.00000000

-V(xc)+E(xc)    XCENC =        1743.78977604

PAW double counting =    52175.01693708    -52237.93420591

entropy T\*S     EENTRO =        -0.00000000

eigenvalues     EBANDS =        -5814.82622293

atomic energy   EATOM =        18704.32991668

Solvation    Ediel\_sol =        0.00000000

---

free energy     TOTEN =        -1202.76993563 eV

energy without entropy =    -1202.76993563    energy(sigma->0) =    -1202.76993563

---

----- Iteration 3( 5) -----

POTLOK: cpu time 0.1695: real time 0.1820  
SETDIJ: cpu time 0.0101: real time 0.0101  
EDDIAG: cpu time 1.9228: real time 1.9296  
RMM-DIIS: cpu time 7.2937: real time 7.3229  
ORTHCH: cpu time 0.3534: real time 0.3544  
DOS: cpu time 0.0004: real time 0.0004  
CHARGE: cpu time 0.5283: real time 0.5301  
MIXING: cpu time 0.0052: real time 0.0052

-----

LOOP: cpu time 10.2833: real time 10.3347

eigenvalue-minimisations : 1946

total energy-change (2. order) : 0.1584532E-04 (-0.2433704E-05)

number of electron 518.9999724 magnetization 0.9999998

augmentation part 11.7366427 magnetization 0.0542711

Broyden mixing:

rms(total) = 0.12011E-02 rms(broyden)= 0.12000E-02

rms(prec ) = 0.13201E-02

weight for this iteration      100.00

eigenvalues of (default mixing \* dielectric matrix)

average eigenvalue GAMMA=    1.4212

2.5062   0.8362   0.8362   1.5061

Free energy of the ion-electron system (eV)

-----  
alpha Z      PSCENC =      233.50077011

Ewald energy    TEWEN =      91329.23845853

-Hartree energ DENC =   -107335.88673614

-exchange      EXHF =      0.00000000

-V(xc)+E(xc)    XCENC =      1743.79023957

PAW double counting =    52175.01469511   -52237.93217141

entropy T\*S    EENTRO =      -0.00000000

eigenvalues    EBANDS =      -5814.82509224

atomic energy   EATOM =      18704.32991668

Solvation    Ediel\_sol =      0.00000000

-----  
free energy    TOTEN =      -1202.76991979 eV

energy without entropy =   -1202.76991979    energy(sigma->0) =   -1202.76991979

-----

----- Iteration 3( 6) -----

|           |          |          |           |         |
|-----------|----------|----------|-----------|---------|
| POTLOK:   | cpu time | 0.1680:  | real time | 0.1833  |
| SETDIJ:   | cpu time | 0.0101:  | real time | 0.0101  |
| EDDIAG:   | cpu time | 1.9227:  | real time | 1.9295  |
| RMM-DIIS: | cpu time | 7.1509:  | real time | 7.2082  |
| ORTHCH:   | cpu time | 0.3530:  | real time | 0.3541  |
| DOS:      | cpu time | 0.0004:  | real time | 0.0004  |
| CHARGE:   | cpu time | 0.5289:  | real time | 0.5307  |
| MIXING:   | cpu time | 0.0054:  | real time | 0.0055  |
| -----     |          |          |           |         |
| LOOP:     | cpu time | 10.1393: | real time | 10.2218 |

total energy-change (2. order) :-0.4936155E-06 (-0.1347551E-05)

number of electron      518.9999724 magnetization      0.9999998

augmentation part      11.7365199 magnetization      0.0542715

Broyden mixing:

rms(total) = 0.43920E-03      rms(broyden)= 0.43697E-03

rms(prec ) = 0.50106E-03

weight for this iteration      100.00

eigenvalues of (default mixing \* dielectric matrix)

average eigenvalue GAMMA=      1.3953

2.6039   1.7450   0.7589   0.9344   0.9344

Free energy of the ion-electron system (eV)

-----

alpha Z      PSCENC =      233.50077011

Ewald energy      TEWEN =      91329.23845853

-Hartree energ DENC =      -107335.87967128

-exchange      EXHF =      0.00000000

-V(xc)+E(xc)      XCENC =      1743.79045287

PAW double counting =      52175.08736342      -52238.00499975

entropy T\*S      EENTRO =      -0.00000000

eigenvalues EBANDS = -5814.83221087

atomic energy EATOM = 18704.32991668

Solvation Ediel\_sol = 0.00000000

-----  
free energy TOTEN = -1202.76992028 eV

energy without entropy = -1202.76992028 energy(sigma->0) = -1202.76992028

----- Iteration 3( 7) -----

POTLOK: cpu time 0.1680: real time 0.1842

SETDIJ: cpu time 0.0101: real time 0.0101

EDDIAG: cpu time 1.9281: real time 1.9348

RMM-DIIS: cpu time 6.0661: real time 6.0854

ORTHCH: cpu time 0.3545: real time 0.3555

DOS: cpu time 0.0004: real time 0.0004

CHARGE: cpu time 0.5299: real time 0.5318

MIXING: cpu time 0.0054: real time 0.0054

-----

LOOP: cpu time 9.0625: real time 9.1077

eigenvalue-minimisations : 1645

total energy-change (2. order) :-0.2457935E-05 (-0.8603353E-07)

number of electron 518.9999724 magnetization 0.9999998

augmentation part 11.7365382 magnetization 0.0542715

Broyden mixing:

rms(total) = 0.17744E-03 rms(broyden)= 0.17737E-03

rms(prec ) = 0.22576E-03

weight for this iteration 100.00

eigenvalues of (default mixing \* dielectric matrix)

average eigenvalue GAMMA= 1.3489

2.6474 1.8893 1.0314 1.0314 0.7811 0.7128

Free energy of the ion-electron system (eV)

-----

alpha Z        PSCENC =        233.50077011  
Ewald energy    TEWEN  =        91329.23845853  
  
-Hartree energ DENC    =    -107335.86469088  
  
-exchange        EXHF    =        0.00000000  
  
-V(xc)+E(xc)    XCENC  =        1743.79024390  
  
PAW double counting    =    52175.11532475    -52238.03292380  
  
entropy T\*S      EENTRO =        -0.00000000  
  
eigenvalues      EBANDS =        -5814.84702203  
  
atomic energy    EATOM  =        18704.32991668  
  
Solvation    Ediel\_sol  =        0.00000000

-----

free energy      TOTEN  =        -1202.76992274 eV

energy without entropy =    -1202.76992274    energy(sigma->0) =    -1202.76992274

-----

|           |          |         |           |        |
|-----------|----------|---------|-----------|--------|
| POTLOK:   | cpu time | 0.1691: | real time | 0.1726 |
| SETDIJ:   | cpu time | 0.0101: | real time | 0.0101 |
| EDDIAG:   | cpu time | 1.9207: | real time | 1.9275 |
| RMM-DIIS: | cpu time | 5.5063: | real time | 5.5282 |
| ORTHCH:   | cpu time | 0.3525: | real time | 0.3537 |
| DOS:      | cpu time | 0.0004: | real time | 0.0004 |
| CHARGE:   | cpu time | 0.5287: | real time | 0.5305 |
| MIXING:   | cpu time | 0.0056: | real time | 0.0056 |
| -----     |          |         |           |        |
| LOOP:     | cpu time | 8.4935: | real time | 8.5286 |

eigenvalue-minimisations : 1500

total energy-change (2. order) :-0.2662993E-05 (-0.3195138E-07)

number of electron 518.9999724 magnetization 0.9999998

augmentation part 11.7365551 magnetization 0.0542716

Broyden mixing:

rms(total) = 0.92055E-04 rms(broyden)= 0.91961E-04

rms(prec ) = 0.13709E-03

weight for this iteration 100.00

eigenvalues of (default mixing \* dielectric matrix)

average eigenvalue GAMMA= 1.3620

2.6845 2.1033 1.3198 1.0061 1.0061 0.7885 0.6259

Free energy of the ion-electron system (eV)

-----

alpha Z PSCENC = 233.50077011

Ewald energy TEWEN = 91329.23845853

-Hartree energy DENC = -107335.85396107

-exchange EXHF = 0.00000000

-V(xc)+E(xc) XCENC = 1743.79010523

PAW double counting = 52175.13541466 -52238.05298089

entropy T\*S EENTRO = -0.00000000

eigenvalues EBANDS = -5814.85764866

atomic energy EATOM = 18704.32991668

Solvation Ediel\_sol = 0.00000000

-----

free energy TOTEN = -1202.76992540 eV

energy without entropy = -1202.76992540 energy(sigma->0) = -1202.76992540

-----

----- Iteration 3( 9) -----

|           |          |         |           |        |
|-----------|----------|---------|-----------|--------|
| POTLOK:   | cpu time | 0.1676: | real time | 0.1797 |
| SETDIJ:   | cpu time | 0.0101: | real time | 0.0102 |
| EDDIAG:   | cpu time | 1.9225: | real time | 1.9290 |
| RMM-DIIS: | cpu time | 5.1299: | real time | 5.1529 |
| ORTHCH:   | cpu time | 0.3551: | real time | 0.3563 |
| DOS:      | cpu time | 0.0004: | real time | 0.0004 |
| CHARGE:   | cpu time | 0.5301: | real time | 0.5321 |
| MIXING:   | cpu time | 0.0063: | real time | 0.0064 |
| -----     |          |         |           |        |
| LOOP:     | cpu time | 8.1221: | real time | 8.1671 |

eigenvalue-minimisations : 1403

total energy-change (2. order) :-0.2710083E-05 (-0.7781662E-08)

number of electron      518.9999724 magnetization      0.9999998  
augmentation part      11.7365532 magnetization      0.0542716

Broyden mixing:

rms(total) = 0.55446E-04      rms(broyden)= 0.55433E-04

rms(prec ) = 0.95243E-04

weight for this iteration      100.00

eigenvalues of (default mixing \* dielectric matrix)

average eigenvalue GAMMA=      1.4259

2.7928   2.3930   1.7127   1.2509   0.9257   0.9257   0.7901   0.6166

Free energy of the ion-electron system (eV)

-----

alpha Z      PSCENC =      233.50077011

Ewald energy      TEWEN =      91329.23845853

-Hartree energ DENC =      -107335.84459273

-exchange      EXHF =      0.00000000

-V(xc)+E(xc)      XCENC =      1743.79004264

PAW double counting =      52175.15399774      -52238.07155471

entropy T\*S      EENTRO =      -0.00000000

eigenvalues      EBANDS =      -5814.86696638

atomic energy EATOM = 18704.32991668

Solvation Ediel\_sol = 0.00000000

-----  
free energy TOTEN = -1202.76992811 eV

energy without entropy = -1202.76992811 energy(sigma->0) = -1202.76992811

----- Iteration 3( 10) -----

POTLOK: cpu time 0.1670: real time 0.1739

SETDIJ: cpu time 0.0101: real time 0.0101

EDDIAG: cpu time 1.9202: real time 1.9267

RMM-DIIS: cpu time 5.3305: real time 5.3505

ORTHCH: cpu time 0.3552: real time 0.3564

DOS: cpu time 0.0004: real time 0.0004

CHARGE: cpu time 0.5301: real time 0.5319

MIXING: cpu time 0.0063: real time 0.0064

-----

LOOP: cpu time 8.3199: real time 8.3563

eigenvalue-minimisations : 1452

total energy-change (2. order) :-0.3777714E-05 (-0.1367793E-07)

number of electron 518.9999724 magnetization 0.9999998

augmentation part 11.7365464 magnetization 0.0542718

Broyden mixing:

rms(total) = 0.40167E-04 rms(broyden)= 0.40124E-04

rms(prec ) = 0.63298E-04

weight for this iteration 100.00

eigenvalues of (default mixing \* dielectric matrix)

average eigenvalue GAMMA= 1.4518

3.1651 2.5987 1.9214 1.1724 1.0173 1.0173 0.7795 0.7795 0.6153

Free energy of the ion-electron system (eV)

-----

alpha Z PSCENC = 233.50077011

Ewald energy TEWEN = 91329.23845853

-Hartree energy DENC = -107335.83148901

-exchange EXHF = 0.00000000

-V(xc)+E(xc) XCENC = 1743.78997561

PAW double counting = 52175.17054541 -52238.08809802

entropy T\*S EENTRO = -0.00000000

eigenvalues EBANDS = -5814.88001121

atomic energy EATOM = 18704.32991668

Solvation Ediel\_sol = 0.00000000

-----

free energy TOTEN = -1202.76993189 eV

energy without entropy = -1202.76993189 energy(sigma->0) = -1202.76993189

-----

----- Iteration 3( 11) -----

|           |          |         |           |        |
|-----------|----------|---------|-----------|--------|
| POTLOK:   | cpu time | 0.1697: | real time | 0.1858 |
| SETDIJ:   | cpu time | 0.0102: | real time | 0.0102 |
| EDDIAG:   | cpu time | 1.9235: | real time | 1.9303 |
| RMM-DIIS: | cpu time | 5.0579: | real time | 5.0801 |
| ORTHCH:   | cpu time | 0.3527: | real time | 0.3538 |
| DOS:      | cpu time | 0.0004: | real time | 0.0004 |
| CHARGE:   | cpu time | 0.5305: | real time | 0.5323 |
| MIXING:   | cpu time | 0.0069: | real time | 0.0069 |
| -----     |          |         |           |        |
| LOOP:     | cpu time | 8.0517: | real time | 8.0999 |

eigenvalue-minimisations : 1379

total energy-change (2. order) :-0.2854365E-05 (-0.9419120E-08)

number of electron 518.9999724 magnetization 0.9999998

augmentation part 11.7365491 magnetization 0.0542718

Broyden mixing:

rms(total) = 0.20919E-04 rms(broyden)= 0.20899E-04

rms(prec ) = 0.36261E-04

weight for this iteration 100.00

eigenvalues of (default mixing \* dielectric matrix)

average eigenvalue GAMMA= 1.5036

3.7613 2.6553 1.9757 1.3139 1.3139 0.9495 0.9495 0.7905 0.7081 0.6181

Free energy of the ion-electron system (eV)

-----

alpha Z PSCENC = 233.50077011

Ewald energy TEWEN = 91329.23845853

-Hartree energy DENC = -107335.82207478

-exchange EXHF = 0.00000000

-V(xc)+E(xc) XCENC = 1743.78990411

PAW double counting = 52175.17217854 -52238.08972298

entropy T\*S EENTRO = -0.00000000

eigenvalues EBANDS = -5814.88936497

atomic energy EATOM = 18704.32991668

Solvation Ediel\_sol = 0.00000000

-----

free energy TOTEN = -1202.76993474 eV

energy without entropy = -1202.76993474 energy(sigma->0) = -1202.76993474

-----

----- Iteration 3( 12) -----

|           |          |         |           |        |
|-----------|----------|---------|-----------|--------|
| POTLOK:   | cpu time | 0.1681: | real time | 0.1749 |
| SETDIJ:   | cpu time | 0.0100: | real time | 0.0100 |
| EDDIAG:   | cpu time | 1.9238: | real time | 1.9301 |
| RMM-DIIS: | cpu time | 4.9250: | real time | 4.9407 |
| ORTHCH:   | cpu time | 0.3546: | real time | 0.3558 |
| DOS:      | cpu time | 0.0004: | real time | 0.0004 |
| CHARGE:   | cpu time | 0.5267: | real time | 0.5288 |
| MIXING:   | cpu time | 0.0072: | real time | 0.0072 |

-----

|       |          |         |           |        |
|-------|----------|---------|-----------|--------|
| LOOP: | cpu time | 7.9158: | real time | 7.9479 |
|-------|----------|---------|-----------|--------|

eigenvalue-minimisations : 1334

total energy-change (2. order) :-0.1966080E-05 (-0.5816063E-08)

number of electron 518.9999724 magnetization 0.9999998

augmentation part            11.7365500 magnetization            0.0542718

Broyden mixing:

rms(total) = 0.18909E-04      rms(broyden)= 0.18900E-04

rms(prec ) = 0.27045E-04

weight for this iteration      100.00

eigenvalues of (default mixing \* dielectric matrix)

average eigenvalue GAMMA=    1.6442

4.9393   2.6954   2.3360   1.8825   1.1177   1.1177   1.0252   0.8404   0.8404   0.6203

0.6711

Free energy of the ion-electron system (eV)

-----

alpha Z            PSCENC =            233.50077011

Ewald energy      TEWEN   =            91329.23845853

-Hartree energ DENC   =   -107335.81609427

-exchange          EXHF     =            0.00000000

-V(xc)+E(xc)      XCENC   =            1743.78986839

PAW double counting   =   52175.16979994   -52238.08734286

entropy T\*S        EENTRO =            -0.00000000

eigenvalues        EBANDS =            -5814.89531323

atomic energy EATOM = 18704.32991668

Solvation Ediel\_sol = 0.00000000

-----  
free energy TOTEN = -1202.76993671 eV

energy without entropy = -1202.76993671 energy(sigma->0) = -1202.76993671

----- Iteration 3( 13) -----

POTLOK: cpu time 0.1702: real time 0.1911

SETDIJ: cpu time 0.0101: real time 0.0101

EDDIAG: cpu time 1.9253: real time 1.9320

RMM-DIIS: cpu time 4.7861: real time 4.8320

ORTHCH: cpu time 0.3530: real time 0.3543

DOS: cpu time 0.0004: real time 0.0004

CHARGE:  cpu time     0.5273: real time     0.5291

MIXING:  cpu time     0.0078: real time     0.0078

-----

LOOP:  cpu time     7.7802: real time     7.8568

eigenvalue-minimisations  :  1298

total energy-change (2. order) :-0.1561362E-05  (-0.4296533E-08)

number of electron       518.9999724 magnetization       0.9999998

augmentation part       11.7365479 magnetization       0.0542718

Broyden mixing:

rms(total) = 0.79623E-05     rms(broyden)= 0.79376E-05

rms(prec ) = 0.12969E-04

weight for this iteration     100.00

eigenvalues of (default mixing \* dielectric matrix)

average eigenvalue GAMMA=    1.6938

5.8249  2.7357  2.5238  1.8980  1.1912  1.1912  1.0100  1.0100  0.8288  0.8288

0.6212  0.6620

Free energy of the ion-electron system (eV)

-----

alpha Z PSCENC = 233.50077011  
Ewald energy TEWEN = 91329.23845853  
-Hartree energy DENC = -107335.81159034  
-exchange EXHF = 0.00000000  
-V(xc)+E(xc) XCENC = 1743.78985729  
PAW double counting = 52175.16731007 -52238.08485638  
entropy T\*S EENTRO = -0.00000000  
eigenvalues EBANDS = -5814.89980423  
atomic energy EATOM = 18704.32991668  
Solvation Ediel\_sol = 0.00000000

-----  
free energy TOTEN = -1202.76993827 eV

energy without entropy = -1202.76993827 energy(sigma->0) = -1202.76993827

|           |          |         |           |        |
|-----------|----------|---------|-----------|--------|
| POTLOK:   | cpu time | 0.1659: | real time | 0.1663 |
| SETDIJ:   | cpu time | 0.0101: | real time | 0.0102 |
| EDDIAG:   | cpu time | 1.9209: | real time | 1.9264 |
| RMM-DIIS: | cpu time | 4.5824: | real time | 4.6030 |
| ORTHCH:   | cpu time | 0.3613: | real time | 0.3622 |
| DOS:      | cpu time | 0.0004: | real time | 0.0004 |
| CHARGE:   | cpu time | 0.5280: | real time | 0.5295 |
| MIXING:   | cpu time | 0.0081: | real time | 0.0081 |
| -----     |          |         |           |        |
| LOOP:     | cpu time | 7.5772: | real time | 7.6061 |

eigenvalue-minimisations : 1184

total energy-change (2. order) :-0.8497373E-06 (-0.1475422E-08)

number of electron      518.9999724 magnetization      0.9999998

augmentation part      11.7365481 magnetization      0.0542718

Broyden mixing:

rms(total) = 0.48157E-05      rms(broyden)= 0.48136E-05

rms(prec ) = 0.79916E-05

weight for this iteration      100.00

eigenvalues of (default mixing \* dielectric matrix)

average eigenvalue GAMMA= 1.7524

6.5696 2.8955 2.6349 1.9967 1.7573 1.0881 1.0881 1.0630 0.8377 0.8377

0.7427 0.6226 0.6475

Free energy of the ion-electron system (eV)

-----  
alpha Z PSCENC = 233.50077011

Ewald energy TEWEN = 91329.23845853

-Hartree energ DENC = -107335.80989949

-exchange EXHF = 0.00000000

-V(xc)+E(xc) XCENC = 1743.78985257

PAW double counting = 52175.16732847 -52238.08487422

entropy T\*S EENTRO = -0.00000000

eigenvalues EBANDS = -5814.90149178

atomic energy EATOM = 18704.32991668

Solvation Ediel\_sol = 0.00000000

-----  
free energy TOTEN = -1202.76993912 eV

energy without entropy = -1202.76993912 energy(sigma->0) = -1202.76993912

-----

----- Iteration 3( 15) -----

|           |          |         |           |        |
|-----------|----------|---------|-----------|--------|
| POTLOK:   | cpu time | 0.1662: | real time | 0.1850 |
| SETDIJ:   | cpu time | 0.0100: | real time | 0.0101 |
| EDDIAG:   | cpu time | 1.9242: | real time | 1.9299 |
| RMM-DIIS: | cpu time | 4.5528: | real time | 4.5665 |
| ORTHCH:   | cpu time | 0.3519: | real time | 0.3530 |
| DOS:      | cpu time | 0.0004: | real time | 0.0004 |
| CHARGE:   | cpu time | 0.5272: | real time | 0.5289 |
| MIXING:   | cpu time | 0.0082: | real time | 0.0082 |
| -----     |          |         |           |        |
| LOOP:     | cpu time | 7.5409: | real time | 7.5821 |

eigenvalue-minimisations : 1176

total energy-change (2. order) :-0.6345217E-06 (-0.7310934E-09)

number of electron      518.9999724 magnetization      0.9999998

augmentation part      11.7365483 magnetization      0.0542718

Broyden mixing:

rms(total) = 0.30820E-05      rms(broyden)= 0.30805E-05

rms(prec ) = 0.51410E-05

weight for this iteration      100.00

eigenvalues of (default mixing \* dielectric matrix)

average eigenvalue GAMMA=      1.7950

7.0186   3.2769   2.6575   2.2298   1.7728   1.2812   1.1003   1.1003   1.0347   0.8486

0.8486   0.6997   0.6244   0.6365

Free energy of the ion-electron system (eV)

-----

alpha Z      PSCENC =      233.50077011

Ewald energy      TEWEN =      91329.23845853

-Hartree energ      DENC =      -107335.80917557

-exchange      EXHF =      0.00000000

-V(xc)+E(xc)      XCENC =      1743.78985150

PAW double counting =      52175.16782645      -52238.08537157

entropy T\*S    EENTRO =        -0.00000000

eigenvalues    EBANDS =        -5814.90221589

atomic energy   EATOM =        18704.32991668

Solvation    Ediel\_sol =        0.00000000

-----  
free energy    TOTEN =        -1202.76993975 eV

energy without entropy =    -1202.76993975    energy(sigma->0) =    -1202.76993975

----- Iteration        3( 16) -----

POTLOK:    cpu time    0.1645: real time    0.1657

SETDIJ:    cpu time    0.0101: real time    0.0101

EDDIAG:    cpu time    1.9226: real time    1.9289

RMM-DIIS:    cpu time    4.5657: real time    4.5815

ORTHCH: cpu time 0.3561: real time 0.3573

DOS: cpu time 0.0004: real time 0.0004

CHARGE: cpu time 0.5279: real time 0.5299

MIXING: cpu time 0.0089: real time 0.0089

-----

LOOP: cpu time 7.5563: real time 7.5827

eigenvalue-minimisations : 1190

total energy-change (2. order) :-0.5300390E-06 (-0.4799432E-09)

number of electron 518.9999724 magnetization 0.9999998

augmentation part 11.7365484 magnetization 0.0542718

Broyden mixing:

rms(total) = 0.17653E-05 rms(broyden)= 0.17643E-05

rms(prec ) = 0.29277E-05

weight for this iteration 100.00

eigenvalues of (default mixing \* dielectric matrix)

average eigenvalue GAMMA= 1.8619

7.5273 3.9547 2.6997 2.4377 1.8278 1.7183 1.1054 1.1054 0.9713 0.9713

0.8373 0.8373 0.6781 0.6254 0.6317

Free energy of the ion-electron system (eV)

-----

alpha Z        PSCENC =        233.50077011

Ewald energy    TEWEN =        91329.23845853

-Hartree energy DENC =   -107335.80883160

-exchange       EXHF =            0.00000000

-V(xc)+E(xc)    XCENC =        1743.78985259

PAW double counting =    52175.16850552   -52238.08605033

entropy T\*S     EENTRO =        -0.00000000

eigenvalues     EBANDS =       -5814.90256178

atomic energy   EATOM =        18704.32991668

Solvation    Ediel\_sol =        0.00000000

-----

free energy     TOTEN =       -1202.76994028 eV

energy without entropy =   -1202.76994028    energy(sigma->0) =   -1202.76994028

-----

----- Iteration 3( 17) -----

|           |          |         |           |        |
|-----------|----------|---------|-----------|--------|
| POTLOK:   | cpu time | 0.1746: | real time | 0.1908 |
| SETDIJ:   | cpu time | 0.0101: | real time | 0.0101 |
| EDDIAG:   | cpu time | 1.9237: | real time | 1.9307 |
| RMM-DIIS: | cpu time | 4.2319: | real time | 4.2455 |
| ORTHCH:   | cpu time | 0.3528: | real time | 0.3539 |
| DOS:      | cpu time | 0.0004: | real time | 0.0004 |
| CHARGE:   | cpu time | 0.5304: | real time | 0.5323 |
| MIXING:   | cpu time | 0.0092: | real time | 0.0092 |

-----

|       |          |         |           |        |
|-------|----------|---------|-----------|--------|
| LOOP: | cpu time | 7.2330: | real time | 7.2729 |
|-------|----------|---------|-----------|--------|

eigenvalue-minimisations : 1036

total energy-change (2. order) :-0.1350418E-06 (-0.2214318E-09)

|                    |             |               |           |
|--------------------|-------------|---------------|-----------|
| number of electron | 518.9999724 | magnetization | 0.9999998 |
|--------------------|-------------|---------------|-----------|

|                   |            |               |           |
|-------------------|------------|---------------|-----------|
| augmentation part | 11.7365484 | magnetization | 0.0542718 |
|-------------------|------------|---------------|-----------|

Broyden mixing:

|                          |                           |
|--------------------------|---------------------------|
| rms(total) = 0.10326E-05 | rms(broyden)= 0.10318E-05 |
|--------------------------|---------------------------|

rms(prec ) = 0.16962E-05

weight for this iteration 100.00

eigenvalues of (default mixing \* dielectric matrix)

average eigenvalue GAMMA= 1.8842

7.8906 4.4945 2.7448 2.5285 2.0167 1.6994 1.1126 1.1126 1.0924 1.0924

0.8401 0.8401 0.7649 0.6641 0.6264 0.6264

Free energy of the ion-electron system (eV)

-----

alpha Z PSCENC = 233.50077011

Ewald energy TEWEN = 91329.23845853

-Hartree energy DENC = -107335.80875122

-exchange EXHF = 0.00000000

-V(xc)+E(xc) XCENC = 1743.78985406

PAW double counting = 52175.16900206 -52238.08654685

entropy T\*S EENTRO = -0.00000000

eigenvalues EBANDS = -5814.90264379

atomic energy EATOM = 18704.32991668

Solvation Ediel\_sol = 0.00000000

-----

free energy TOTEN = -1202.76994042 eV

energy without entropy = -1202.76994042 energy(sigma->0) = -1202.76994042

-----

----- Iteration 3( 18) -----

|           |          |         |           |        |
|-----------|----------|---------|-----------|--------|
| POTLOK:   | cpu time | 0.1665: | real time | 0.1675 |
| SETDIJ:   | cpu time | 0.0100: | real time | 0.0101 |
| EDDIAG:   | cpu time | 1.9218: | real time | 1.9282 |
| RMM-DIIS: | cpu time | 4.0494: | real time | 4.0626 |
| ORTHCH:   | cpu time | 0.3533: | real time | 0.3544 |
| DOS:      | cpu time | 0.0003: | real time | 0.0003 |
| -----     |          |         |           |        |
| LOOP:     | cpu time | 6.5012: | real time | 6.5229 |

eigenvalue-minimisations : 926

total energy-change (2. order) :-0.3149034E-07 (-0.4978062E-10)

number of electron      518.9999724 magnetization      0.9999998

augmentation part      11.7365484 magnetization      0.0542718

Free energy of the ion-electron system (eV)

-----

alpha Z      PSCENC =      233.50077011

Ewald energy      TEWEN =      91329.23845853

-Hartree energ      DENC =      -107335.80875806

-exchange      EXHF =      0.00000000

-V(xc)+E(xc)      XCENC =      1743.78985529

PAW double counting      =      52175.16910445      -52238.08664948

entropy T\*S      EENTRO =      -0.00000000

eigenvalues      EBANDS =      -5814.90263798

atomic energy      EATOM =      18704.32991668

Solvation      Ediel\_sol =      0.00000000

-----

free energy      TOTEN =      -1202.76994045 eV

energy without entropy =      -1202.76994045      energy(sigma->0) =      -1202.76994045

-----

average (electrostatic) potential at core

the test charge radii are      0.5201   0.6991   1.0621   0.7215

(the norm of the test charge is                      1.0000)

|             |             |             |             |             |
|-------------|-------------|-------------|-------------|-------------|
| 1 -40.7532  | 2 -40.7511  | 3 -40.7525  | 4 -40.7512  | 5 -40.7532  |
| 6 -40.7554  | 7 -40.7529  | 8 -40.7607  | 9 -40.7525  | 10 -40.7600 |
| 11 -40.7539 | 12 -40.7559 | 13 -40.6509 | 14 -40.6965 | 15 -40.7709 |
| 16 -40.6988 | 17 -40.6927 | 18 -40.8552 | 19 -40.6799 | 20 -40.6675 |
| 21 -40.6891 | 22 -40.6623 | 23 -40.0880 | 24 -40.1314 | 25 -57.4593 |
| 26 -57.6705 | 27 -57.6573 | 28 -57.4693 | 29 -57.6641 | 30 -57.4593 |
| 31 -57.6703 | 32 -57.6569 | 33 -57.4672 | 34 -57.6690 | 35 -57.4601 |
| 36 -57.6721 | 37 -57.6570 | 38 -57.4694 | 39 -57.6748 | 40 -57.4592 |
| 41 -57.6761 | 42 -57.6572 | 43 -57.4744 | 44 -57.6893 | 45 -57.4592 |
| 46 -57.6750 | 47 -57.6580 | 48 -57.4743 | 49 -57.6804 | 50 -57.4603 |
| 51 -57.6718 | 52 -57.6577 | 53 -57.4722 | 54 -57.6668 | 55 -57.6372 |
| 56 -57.6633 | 57 -57.6876 | 58 -57.6840 | 59 -57.6670 | 60 -57.6698 |
| 61 -57.6908 | 62 -57.6755 | 63 -57.6375 | 64 -57.6627 | 65 -57.6897 |
| 66 -57.6953 | 67 -57.6652 | 68 -57.6696 | 69 -57.6944 | 70 -57.7018 |

|              |              |              |              |              |
|--------------|--------------|--------------|--------------|--------------|
| 71 -57.6369  | 72 -57.6641  | 73 -57.6973  | 74 -57.7220  | 75 -57.6661  |
| 76 -57.6702  | 77 -57.7065  | 78 -57.7511  | 79 -57.6371  | 80 -57.6667  |
| 81 -57.7111  | 82 -57.7527  | 83 -57.6694  | 84 -57.6717  | 85 -57.7383  |
| 86 -57.8420  | 87 -57.6396  | 88 -57.6674  | 89 -57.7129  | 90 -57.7179  |
| 91 -57.6741  | 92 -57.6719  | 93 -57.7423  | 94 -57.7609  | 95 -57.6379  |
| 96 -57.6656  | 97 -57.6967  | 98 -57.6914  | 99 -57.6713  | 100 -57.6707 |
| 101 -57.7087 | 102 -57.6866 | 103 -57.6608 | 104 -57.6315 | 105 -57.6464 |
| 106 -57.2910 | 107 -57.3886 | 108 -57.6318 | 109 -57.5984 | 110 -57.6597 |
| 111 -57.6315 | 112 -57.6428 | 113 -57.3101 | 114 -57.3944 | 115 -57.6310 |
| 116 -57.6002 | 117 -57.6590 | 118 -57.6233 | 119 -57.6983 | 120 -57.6837 |
| 121 -57.3881 | 122 -57.6298 | 123 -57.7101 | 124 -57.6600 | 125 -57.6260 |
| 126 -57.8314 | 127 -58.3281 | 128 -57.3614 | 129 -57.6351 | 130 -58.1405 |
| 131 -57.6679 | 132 -57.6352 | 133 -57.8036 | 134 -57.4167 | 135 -57.3726 |
| 136 -57.6390 | 137 -58.0808 | 138 -57.6643 | 139 -57.6309 | 140 -57.6722 |
| 141 -57.3004 | 142 -57.3787 | 143 -57.6344 | 144 -57.6482 | 145 -60.8389 |
| 146 -57.3168 | 147 -81.2567 |              |              |              |

E-fermi : -2.3393

XC(G=0): -2.7341

alpha+bet : -2.2521

spin component 1

k-point 1 : 0.0000 0.0000 0.0000

| band No. | band energies | occupation |
|----------|---------------|------------|
| 1        | -26.9550      | 1.00000    |
| 2        | -21.5691      | 1.00000    |
| 3        | -21.4722      | 1.00000    |
| 4        | -21.1001      | 1.00000    |
| 5        | -21.0693      | 1.00000    |
| 6        | -21.0153      | 1.00000    |
| 7        | -20.9794      | 1.00000    |
| 8        | -20.9774      | 1.00000    |
| 9        | -20.8917      | 1.00000    |
| 10       | -20.5582      | 1.00000    |
| 11       | -20.5040      | 1.00000    |
| 12       | -20.4123      | 1.00000    |
| 13       | -20.3987      | 1.00000    |
| 14       | -20.1269      | 1.00000    |
| 15       | -19.9765      | 1.00000    |
| 16       | -19.7038      | 1.00000    |
| 17       | -19.6282      | 1.00000    |
| 18       | -19.6002      | 1.00000    |

|    |          |         |
|----|----------|---------|
| 19 | -19.5846 | 1.00000 |
| 20 | -19.5293 | 1.00000 |
| 21 | -19.5275 | 1.00000 |
| 22 | -19.4993 | 1.00000 |
| 23 | -19.4818 | 1.00000 |
| 24 | -19.1125 | 1.00000 |
| 25 | -19.0761 | 1.00000 |
| 26 | -18.9792 | 1.00000 |
| 27 | -18.9656 | 1.00000 |
| 28 | -18.9012 | 1.00000 |
| 29 | -18.7342 | 1.00000 |
| 30 | -18.5054 | 1.00000 |
| 31 | -18.3597 | 1.00000 |
| 32 | -18.2760 | 1.00000 |
| 33 | -18.2528 | 1.00000 |
| 34 | -18.1840 | 1.00000 |
| 35 | -18.1825 | 1.00000 |
| 36 | -18.0805 | 1.00000 |
| 37 | -18.0767 | 1.00000 |
| 38 | -17.5625 | 1.00000 |
| 39 | -17.3140 | 1.00000 |
| 40 | -17.2883 | 1.00000 |

|    |          |         |
|----|----------|---------|
| 41 | -17.2834 | 1.00000 |
| 42 | -17.2106 | 1.00000 |
| 43 | -17.2042 | 1.00000 |
| 44 | -17.1774 | 1.00000 |
| 45 | -17.0236 | 1.00000 |
| 46 | -16.9509 | 1.00000 |
| 47 | -16.9333 | 1.00000 |
| 48 | -16.8939 | 1.00000 |
| 49 | -16.8920 | 1.00000 |
| 50 | -16.8508 | 1.00000 |
| 51 | -16.8424 | 1.00000 |
| 52 | -16.8218 | 1.00000 |
| 53 | -16.8196 | 1.00000 |
| 54 | -16.7301 | 1.00000 |
| 55 | -16.7269 | 1.00000 |
| 56 | -16.1788 | 1.00000 |
| 57 | -15.7302 | 1.00000 |
| 58 | -15.6929 | 1.00000 |
| 59 | -15.6615 | 1.00000 |
| 60 | -15.6378 | 1.00000 |
| 61 | -15.6168 | 1.00000 |
| 62 | -15.5544 | 1.00000 |

|    |          |         |
|----|----------|---------|
| 63 | -15.5505 | 1.00000 |
| 64 | -15.1759 | 1.00000 |
| 65 | -14.8115 | 1.00000 |
| 66 | -14.6091 | 1.00000 |
| 67 | -14.5788 | 1.00000 |
| 68 | -14.5356 | 1.00000 |
| 69 | -14.4991 | 1.00000 |
| 70 | -14.4692 | 1.00000 |
| 71 | -14.4431 | 1.00000 |
| 72 | -14.3347 | 1.00000 |
| 73 | -14.3061 | 1.00000 |
| 74 | -14.2804 | 1.00000 |
| 75 | -14.2727 | 1.00000 |
| 76 | -14.1832 | 1.00000 |
| 77 | -14.1793 | 1.00000 |
| 78 | -13.8920 | 1.00000 |
| 79 | -13.7602 | 1.00000 |
| 80 | -13.5945 | 1.00000 |
| 81 | -13.5491 | 1.00000 |
| 82 | -13.5302 | 1.00000 |
| 83 | -13.4985 | 1.00000 |
| 84 | -13.4467 | 1.00000 |

|     |          |         |
|-----|----------|---------|
| 85  | -13.3648 | 1.00000 |
| 86  | -13.3462 | 1.00000 |
| 87  | -13.1893 | 1.00000 |
| 88  | -12.7870 | 1.00000 |
| 89  | -12.7602 | 1.00000 |
| 90  | -12.7274 | 1.00000 |
| 91  | -12.6967 | 1.00000 |
| 92  | -12.6867 | 1.00000 |
| 93  | -12.6249 | 1.00000 |
| 94  | -12.4618 | 1.00000 |
| 95  | -12.4471 | 1.00000 |
| 96  | -12.3824 | 1.00000 |
| 97  | -12.3252 | 1.00000 |
| 98  | -12.2138 | 1.00000 |
| 99  | -12.2041 | 1.00000 |
| 100 | -12.1658 | 1.00000 |
| 101 | -11.9483 | 1.00000 |
| 102 | -11.6854 | 1.00000 |
| 103 | -11.6282 | 1.00000 |
| 104 | -11.6118 | 1.00000 |
| 105 | -11.5777 | 1.00000 |
| 106 | -11.1005 | 1.00000 |

|     |          |         |
|-----|----------|---------|
| 107 | -11.0699 | 1.00000 |
| 108 | -10.8994 | 1.00000 |
| 109 | -10.8882 | 1.00000 |
| 110 | -10.8327 | 1.00000 |
| 111 | -10.7113 | 1.00000 |
| 112 | -10.6797 | 1.00000 |
| 113 | -10.6623 | 1.00000 |
| 114 | -10.6473 | 1.00000 |
| 115 | -10.5900 | 1.00000 |
| 116 | -10.5816 | 1.00000 |
| 117 | -10.5723 | 1.00000 |
| 118 | -10.5685 | 1.00000 |
| 119 | -10.5269 | 1.00000 |
| 120 | -10.5260 | 1.00000 |
| 121 | -10.5112 | 1.00000 |
| 122 | -10.5035 | 1.00000 |
| 123 | -10.3793 | 1.00000 |
| 124 | -10.2939 | 1.00000 |
| 125 | -10.2568 | 1.00000 |
| 126 | -10.1883 | 1.00000 |
| 127 | -10.1871 | 1.00000 |
| 128 | -10.0639 | 1.00000 |

|     |          |         |
|-----|----------|---------|
| 129 | -10.0244 | 1.00000 |
| 130 | -9.8912  | 1.00000 |
| 131 | -9.8654  | 1.00000 |
| 132 | -9.7942  | 1.00000 |
| 133 | -9.7868  | 1.00000 |
| 134 | -9.7541  | 1.00000 |
| 135 | -9.6922  | 1.00000 |
| 136 | -9.4493  | 1.00000 |
| 137 | -9.4261  | 1.00000 |
| 138 | -9.3956  | 1.00000 |
| 139 | -9.3886  | 1.00000 |
| 140 | -9.3803  | 1.00000 |
| 141 | -9.3698  | 1.00000 |
| 142 | -9.3107  | 1.00000 |
| 143 | -9.3039  | 1.00000 |
| 144 | -9.2979  | 1.00000 |
| 145 | -9.2845  | 1.00000 |
| 146 | -9.2703  | 1.00000 |
| 147 | -9.0914  | 1.00000 |
| 148 | -9.0044  | 1.00000 |
| 149 | -8.9858  | 1.00000 |
| 150 | -8.9577  | 1.00000 |

|     |         |         |
|-----|---------|---------|
| 151 | -8.9557 | 1.00000 |
| 152 | -8.7925 | 1.00000 |
| 153 | -8.7462 | 1.00000 |
| 154 | -8.7349 | 1.00000 |
| 155 | -8.7184 | 1.00000 |
| 156 | -8.7093 | 1.00000 |
| 157 | -8.6877 | 1.00000 |
| 158 | -8.6784 | 1.00000 |
| 159 | -8.6691 | 1.00000 |
| 160 | -8.6543 | 1.00000 |
| 161 | -8.5949 | 1.00000 |
| 162 | -8.5835 | 1.00000 |
| 163 | -8.5767 | 1.00000 |
| 164 | -8.5683 | 1.00000 |
| 165 | -8.4883 | 1.00000 |
| 166 | -8.4572 | 1.00000 |
| 167 | -8.4365 | 1.00000 |
| 168 | -8.3460 | 1.00000 |
| 169 | -8.2978 | 1.00000 |
| 170 | -8.2744 | 1.00000 |
| 171 | -8.2644 | 1.00000 |
| 172 | -8.2338 | 1.00000 |

|     |         |         |
|-----|---------|---------|
| 173 | -8.2327 | 1.00000 |
| 174 | -8.1522 | 1.00000 |
| 175 | -8.1457 | 1.00000 |
| 176 | -8.0782 | 1.00000 |
| 177 | -8.0443 | 1.00000 |
| 178 | -8.0265 | 1.00000 |
| 179 | -8.0220 | 1.00000 |
| 180 | -7.9733 | 1.00000 |
| 181 | -7.9648 | 1.00000 |
| 182 | -7.9254 | 1.00000 |
| 183 | -7.9010 | 1.00000 |
| 184 | -7.8855 | 1.00000 |
| 185 | -7.8728 | 1.00000 |
| 186 | -7.8012 | 1.00000 |
| 187 | -7.7978 | 1.00000 |
| 188 | -7.7479 | 1.00000 |
| 189 | -7.7109 | 1.00000 |
| 190 | -7.6664 | 1.00000 |
| 191 | -7.6003 | 1.00000 |
| 192 | -7.5852 | 1.00000 |
| 193 | -7.5760 | 1.00000 |
| 194 | -7.5479 | 1.00000 |

|     |         |         |
|-----|---------|---------|
| 195 | -7.4811 | 1.00000 |
| 196 | -7.4805 | 1.00000 |
| 197 | -7.4297 | 1.00000 |
| 198 | -7.3249 | 1.00000 |
| 199 | -7.2498 | 1.00000 |
| 200 | -7.1582 | 1.00000 |
| 201 | -7.0670 | 1.00000 |
| 202 | -7.0420 | 1.00000 |
| 203 | -7.0285 | 1.00000 |
| 204 | -7.0137 | 1.00000 |
| 205 | -6.9970 | 1.00000 |
| 206 | -6.9902 | 1.00000 |
| 207 | -6.9758 | 1.00000 |
| 208 | -6.8663 | 1.00000 |
| 209 | -6.8211 | 1.00000 |
| 210 | -6.8020 | 1.00000 |
| 211 | -6.7937 | 1.00000 |
| 212 | -6.7325 | 1.00000 |
| 213 | -6.6881 | 1.00000 |
| 214 | -6.4712 | 1.00000 |
| 215 | -6.4256 | 1.00000 |
| 216 | -6.3962 | 1.00000 |

|     |         |         |
|-----|---------|---------|
| 217 | -6.3916 | 1.00000 |
| 218 | -6.3745 | 1.00000 |
| 219 | -6.3727 | 1.00000 |
| 220 | -6.3176 | 1.00000 |
| 221 | -6.3078 | 1.00000 |
| 222 | -6.2371 | 1.00000 |
| 223 | -6.2302 | 1.00000 |
| 224 | -6.2297 | 1.00000 |
| 225 | -6.0779 | 1.00000 |
| 226 | -6.0380 | 1.00000 |
| 227 | -5.7932 | 1.00000 |
| 228 | -5.7523 | 1.00000 |
| 229 | -5.6943 | 1.00000 |
| 230 | -5.6416 | 1.00000 |
| 231 | -5.6379 | 1.00000 |
| 232 | -5.5593 | 1.00000 |
| 233 | -5.5308 | 1.00000 |
| 234 | -5.4680 | 1.00000 |
| 235 | -5.4397 | 1.00000 |
| 236 | -5.1663 | 1.00000 |
| 237 | -5.0591 | 1.00000 |
| 238 | -5.0508 | 1.00000 |

|     |         |         |
|-----|---------|---------|
| 239 | -5.0187 | 1.00000 |
| 240 | -4.9894 | 1.00000 |
| 241 | -4.9111 | 1.00000 |
| 242 | -4.8540 | 1.00000 |
| 243 | -4.8230 | 1.00000 |
| 244 | -4.7902 | 1.00000 |
| 245 | -4.6819 | 1.00000 |
| 246 | -4.5730 | 1.00000 |
| 247 | -4.5717 | 1.00000 |
| 248 | -4.5061 | 1.00000 |
| 249 | -4.4462 | 1.00000 |
| 250 | -4.3842 | 1.00000 |
| 251 | -4.2932 | 1.00000 |
| 252 | -4.2663 | 1.00000 |
| 253 | -4.2131 | 1.00000 |
| 254 | -3.5600 | 1.00000 |
| 255 | -3.3550 | 1.00000 |
| 256 | -3.2018 | 1.00000 |
| 257 | -2.9397 | 1.00000 |
| 258 | -2.8488 | 1.00000 |
| 259 | -2.8242 | 1.00000 |
| 260 | -2.6076 | 1.00000 |

|     |         |         |
|-----|---------|---------|
| 261 | -1.9090 | 0.00000 |
| 262 | -1.7686 | 0.00000 |
| 263 | -1.7195 | 0.00000 |
| 264 | -1.3474 | 0.00000 |
| 265 | -1.3191 | 0.00000 |
| 266 | -1.1976 | 0.00000 |
| 267 | -0.7447 | 0.00000 |
| 268 | -0.5850 | 0.00000 |
| 269 | -0.5032 | 0.00000 |
| 270 | -0.3083 | 0.00000 |
| 271 | -0.3061 | 0.00000 |
| 272 | -0.2905 | 0.00000 |
| 273 | -0.1836 | 0.00000 |
| 274 | -0.0583 | 0.00000 |
| 275 | -0.0509 | 0.00000 |
| 276 | -0.0108 | 0.00000 |
| 277 | 0.0346  | 0.00000 |
| 278 | 0.0835  | 0.00000 |
| 279 | 0.1727  | 0.00000 |
| 280 | 0.2203  | 0.00000 |
| 281 | 0.2475  | 0.00000 |
| 282 | 0.4198  | 0.00000 |

|     |        |         |
|-----|--------|---------|
| 283 | 0.4466 | 0.00000 |
| 284 | 0.4815 | 0.00000 |
| 285 | 0.5972 | 0.00000 |
| 286 | 0.6740 | 0.00000 |
| 287 | 0.8185 | 0.00000 |
| 288 | 0.8751 | 0.00000 |
| 289 | 1.0488 | 0.00000 |
| 290 | 1.0913 | 0.00000 |
| 291 | 1.1207 | 0.00000 |
| 292 | 1.1623 | 0.00000 |
| 293 | 1.2232 | 0.00000 |
| 294 | 1.2445 | 0.00000 |
| 295 | 1.2876 | 0.00000 |
| 296 | 1.3138 | 0.00000 |
| 297 | 1.3472 | 0.00000 |
| 298 | 1.4119 | 0.00000 |
| 299 | 1.4665 | 0.00000 |
| 300 | 1.4821 | 0.00000 |
| 301 | 1.5537 | 0.00000 |
| 302 | 1.5865 | 0.00000 |
| 303 | 1.6238 | 0.00000 |
| 304 | 1.6778 | 0.00000 |

|     |        |         |
|-----|--------|---------|
| 305 | 1.7506 | 0.00000 |
| 306 | 1.7628 | 0.00000 |
| 307 | 1.8746 | 0.00000 |
| 308 | 1.8942 | 0.00000 |
| 309 | 1.9047 | 0.00000 |
| 310 | 1.9142 | 0.00000 |
| 311 | 2.1223 | 0.00000 |
| 312 | 2.1874 | 0.00000 |
| 313 | 2.2081 | 0.00000 |
| 314 | 2.2345 | 0.00000 |
| 315 | 2.2752 | 0.00000 |
| 316 | 2.2920 | 0.00000 |
| 317 | 2.3315 | 0.00000 |
| 318 | 2.3533 | 0.00000 |
| 319 | 2.3716 | 0.00000 |
| 320 | 2.3981 | 0.00000 |
| 321 | 2.4201 | 0.00000 |
| 322 | 2.4301 | 0.00000 |
| 323 | 2.4407 | 0.00000 |
| 324 | 2.4527 | 0.00000 |
| 325 | 2.4618 | 0.00000 |
| 326 | 2.5247 | 0.00000 |

|     |        |         |
|-----|--------|---------|
| 327 | 2.5397 | 0.00000 |
| 328 | 2.7014 | 0.00000 |
| 329 | 2.7287 | 0.00000 |
| 330 | 2.7529 | 0.00000 |
| 331 | 2.7565 | 0.00000 |
| 332 | 2.7656 | 0.00000 |
| 333 | 2.8150 | 0.00000 |
| 334 | 2.8334 | 0.00000 |
| 335 | 2.8596 | 0.00000 |
| 336 | 2.8909 | 0.00000 |
| 337 | 2.9238 | 0.00000 |
| 338 | 2.9463 | 0.00000 |
| 339 | 2.9787 | 0.00000 |
| 340 | 3.0053 | 0.00000 |
| 341 | 3.0340 | 0.00000 |
| 342 | 3.0440 | 0.00000 |
| 343 | 3.0658 | 0.00000 |
| 344 | 3.0847 | 0.00000 |
| 345 | 3.1503 | 0.00000 |
| 346 | 3.1624 | 0.00000 |
| 347 | 3.1799 | 0.00000 |
| 348 | 3.1916 | 0.00000 |

|     |        |         |
|-----|--------|---------|
| 349 | 3.3024 | 0.00000 |
| 350 | 3.3229 | 0.00000 |
| 351 | 3.3531 | 0.00000 |
| 352 | 3.3676 | 0.00000 |
| 353 | 3.3900 | 0.00000 |
| 354 | 3.4329 | 0.00000 |
| 355 | 3.4764 | 0.00000 |
| 356 | 3.4839 | 0.00000 |
| 357 | 3.4859 | 0.00000 |
| 358 | 3.4983 | 0.00000 |
| 359 | 3.6344 | 0.00000 |
| 360 | 3.6731 | 0.00000 |
| 361 | 3.6875 | 0.00000 |
| 362 | 3.7323 | 0.00000 |
| 363 | 3.7511 | 0.00000 |
| 364 | 3.7585 | 0.00000 |
| 365 | 3.7725 | 0.00000 |
| 366 | 3.7938 | 0.00000 |
| 367 | 3.8115 | 0.00000 |
| 368 | 3.8333 | 0.00000 |
| 369 | 3.8379 | 0.00000 |
| 370 | 3.8516 | 0.00000 |

|     |        |         |
|-----|--------|---------|
| 371 | 3.8763 | 0.00000 |
| 372 | 3.8836 | 0.00000 |
| 373 | 3.9097 | 0.00000 |
| 374 | 3.9235 | 0.00000 |
| 375 | 3.9340 | 0.00000 |
| 376 | 3.9574 | 0.00000 |
| 377 | 3.9726 | 0.00000 |
| 378 | 3.9839 | 0.00000 |
| 379 | 4.0161 | 0.00000 |
| 380 | 4.0689 | 0.00000 |
| 381 | 4.1644 | 0.00000 |
| 382 | 4.2464 | 0.00000 |
| 383 | 4.2578 | 0.00000 |
| 384 | 4.2589 | 0.00000 |
| 385 | 4.2854 | 0.00000 |
| 386 | 4.3138 | 0.00000 |
| 387 | 4.3282 | 0.00000 |
| 388 | 4.3417 | 0.00000 |
| 389 | 4.3710 | 0.00000 |
| 390 | 4.3809 | 0.00000 |
| 391 | 4.4173 | 0.00000 |
| 392 | 4.4452 | 0.00000 |

|     |        |         |
|-----|--------|---------|
| 393 | 4.4694 | 0.00000 |
| 394 | 4.4805 | 0.00000 |
| 395 | 4.4861 | 0.00000 |
| 396 | 4.4965 | 0.00000 |
| 397 | 4.5171 | 0.00000 |
| 398 | 4.5509 | 0.00000 |
| 399 | 4.5900 | 0.00000 |
| 400 | 4.6081 | 0.00000 |
| 401 | 4.6269 | 0.00000 |
| 402 | 4.6423 | 0.00000 |
| 403 | 4.6567 | 0.00000 |
| 404 | 4.6795 | 0.00000 |
| 405 | 4.7040 | 0.00000 |
| 406 | 4.7314 | 0.00000 |
| 407 | 4.7464 | 0.00000 |
| 408 | 4.7671 | 0.00000 |
| 409 | 4.7831 | 0.00000 |
| 410 | 4.7839 | 0.00000 |
| 411 | 4.7974 | 0.00000 |
| 412 | 4.8277 | 0.00000 |
| 413 | 4.8634 | 0.00000 |
| 414 | 4.8722 | 0.00000 |

|     |        |         |
|-----|--------|---------|
| 415 | 4.8984 | 0.00000 |
| 416 | 4.9315 | 0.00000 |
| 417 | 4.9837 | 0.00000 |
| 418 | 5.0043 | 0.00000 |
| 419 | 5.0108 | 0.00000 |
| 420 | 5.0350 | 0.00000 |
| 421 | 5.0389 | 0.00000 |
| 422 | 5.0643 | 0.00000 |
| 423 | 5.0814 | 0.00000 |
| 424 | 5.1142 | 0.00000 |
| 425 | 5.1178 | 0.00000 |
| 426 | 5.1373 | 0.00000 |
| 427 | 5.1407 | 0.00000 |
| 428 | 5.1535 | 0.00000 |
| 429 | 5.1750 | 0.00000 |
| 430 | 5.1850 | 0.00000 |
| 431 | 5.1883 | 0.00000 |
| 432 | 5.2164 | 0.00000 |
| 433 | 5.2354 | 0.00000 |
| 434 | 5.2413 | 0.00000 |
| 435 | 5.2559 | 0.00000 |
| 436 | 5.2892 | 0.00000 |

|     |        |         |
|-----|--------|---------|
| 437 | 5.2953 | 0.00000 |
| 438 | 5.3088 | 0.00000 |
| 439 | 5.3320 | 0.00000 |
| 440 | 5.3491 | 0.00000 |
| 441 | 5.3668 | 0.00000 |
| 442 | 5.3742 | 0.00000 |
| 443 | 5.3922 | 0.00000 |
| 444 | 5.4209 | 0.00000 |
| 445 | 5.4531 | 0.00000 |
| 446 | 5.4632 | 0.00000 |
| 447 | 5.4816 | 0.00000 |
| 448 | 5.4945 | 0.00000 |
| 449 | 5.5190 | 0.00000 |
| 450 | 5.5495 | 0.00000 |
| 451 | 5.5667 | 0.00000 |
| 452 | 5.5749 | 0.00000 |
| 453 | 5.5954 | 0.00000 |
| 454 | 5.6150 | 0.00000 |
| 455 | 5.6588 | 0.00000 |
| 456 | 5.6811 | 0.00000 |
| 457 | 5.7106 | 0.00000 |
| 458 | 5.7247 | 0.00000 |

|     |        |         |
|-----|--------|---------|
| 459 | 5.7473 | 0.00000 |
| 460 | 5.7653 | 0.00000 |
| 461 | 5.7850 | 0.00000 |
| 462 | 5.7902 | 0.00000 |
| 463 | 5.7968 | 0.00000 |
| 464 | 5.8028 | 0.00000 |
| 465 | 5.8099 | 0.00000 |
| 466 | 5.8322 | 0.00000 |
| 467 | 5.8459 | 0.00000 |
| 468 | 5.8696 | 0.00000 |
| 469 | 5.8818 | 0.00000 |
| 470 | 5.8853 | 0.00000 |
| 471 | 5.9014 | 0.00000 |
| 472 | 5.9142 | 0.00000 |
| 473 | 5.9293 | 0.00000 |
| 474 | 5.9471 | 0.00000 |
| 475 | 5.9805 | 0.00000 |
| 476 | 5.9875 | 0.00000 |
| 477 | 6.0208 | 0.00000 |
| 478 | 6.0315 | 0.00000 |
| 479 | 6.0553 | 0.00000 |
| 480 | 6.1993 | 0.00000 |

spin component 2

k-point 1 : 0.0000 0.0000 0.0000

| band No. | band energies | occupation |
|----------|---------------|------------|
| 1        | -26.9483      | 1.00000    |
| 2        | -21.5679      | 1.00000    |
| 3        | -21.4706      | 1.00000    |
| 4        | -21.0982      | 1.00000    |
| 5        | -21.0684      | 1.00000    |
| 6        | -21.0126      | 1.00000    |
| 7        | -20.9779      | 1.00000    |
| 8        | -20.9756      | 1.00000    |
| 9        | -20.8812      | 1.00000    |
| 10       | -20.5553      | 1.00000    |
| 11       | -20.5006      | 1.00000    |
| 12       | -20.4012      | 1.00000    |
| 13       | -20.3891      | 1.00000    |
| 14       | -20.1228      | 1.00000    |
| 15       | -19.9533      | 1.00000    |
| 16       | -19.7011      | 1.00000    |
| 17       | -19.6269      | 1.00000    |

|    |          |         |
|----|----------|---------|
| 18 | -19.5981 | 1.00000 |
| 19 | -19.5782 | 1.00000 |
| 20 | -19.5280 | 1.00000 |
| 21 | -19.5258 | 1.00000 |
| 22 | -19.4767 | 1.00000 |
| 23 | -19.4623 | 1.00000 |
| 24 | -19.1100 | 1.00000 |
| 25 | -19.0737 | 1.00000 |
| 26 | -18.9692 | 1.00000 |
| 27 | -18.9560 | 1.00000 |
| 28 | -18.8965 | 1.00000 |
| 29 | -18.7046 | 1.00000 |
| 30 | -18.5023 | 1.00000 |
| 31 | -18.3527 | 1.00000 |
| 32 | -18.2479 | 1.00000 |
| 33 | -18.2277 | 1.00000 |
| 34 | -18.1787 | 1.00000 |
| 35 | -18.1770 | 1.00000 |
| 36 | -18.0604 | 1.00000 |
| 37 | -18.0571 | 1.00000 |
| 38 | -17.5591 | 1.00000 |
| 39 | -17.2977 | 1.00000 |

|    |          |         |
|----|----------|---------|
| 40 | -17.2877 | 1.00000 |
| 41 | -17.2740 | 1.00000 |
| 42 | -17.2083 | 1.00000 |
| 43 | -17.2073 | 1.00000 |
| 44 | -17.1744 | 1.00000 |
| 45 | -17.0197 | 1.00000 |
| 46 | -16.9420 | 1.00000 |
| 47 | -16.9229 | 1.00000 |
| 48 | -16.8713 | 1.00000 |
| 49 | -16.8702 | 1.00000 |
| 50 | -16.8299 | 1.00000 |
| 51 | -16.8236 | 1.00000 |
| 52 | -16.8185 | 1.00000 |
| 53 | -16.8160 | 1.00000 |
| 54 | -16.7318 | 1.00000 |
| 55 | -16.7257 | 1.00000 |
| 56 | -16.1761 | 1.00000 |
| 57 | -15.7295 | 1.00000 |
| 58 | -15.6589 | 1.00000 |
| 59 | -15.6440 | 1.00000 |
| 60 | -15.6216 | 1.00000 |
| 61 | -15.5673 | 1.00000 |

|    |          |         |
|----|----------|---------|
| 62 | -15.5286 | 1.00000 |
| 63 | -15.5258 | 1.00000 |
| 64 | -15.1722 | 1.00000 |
| 65 | -14.8093 | 1.00000 |
| 66 | -14.6070 | 1.00000 |
| 67 | -14.5613 | 1.00000 |
| 68 | -14.5011 | 1.00000 |
| 69 | -14.4991 | 1.00000 |
| 70 | -14.4653 | 1.00000 |
| 71 | -14.4388 | 1.00000 |
| 72 | -14.3313 | 1.00000 |
| 73 | -14.2984 | 1.00000 |
| 74 | -14.2687 | 1.00000 |
| 75 | -14.2644 | 1.00000 |
| 76 | -14.1651 | 1.00000 |
| 77 | -14.1617 | 1.00000 |
| 78 | -13.8911 | 1.00000 |
| 79 | -13.7578 | 1.00000 |
| 80 | -13.5918 | 1.00000 |
| 81 | -13.5386 | 1.00000 |
| 82 | -13.5191 | 1.00000 |
| 83 | -13.4949 | 1.00000 |

|     |          |         |
|-----|----------|---------|
| 84  | -13.4449 | 1.00000 |
| 85  | -13.3443 | 1.00000 |
| 86  | -13.3417 | 1.00000 |
| 87  | -13.1878 | 1.00000 |
| 88  | -12.7806 | 1.00000 |
| 89  | -12.7507 | 1.00000 |
| 90  | -12.7184 | 1.00000 |
| 91  | -12.6782 | 1.00000 |
| 92  | -12.6712 | 1.00000 |
| 93  | -12.6227 | 1.00000 |
| 94  | -12.4491 | 1.00000 |
| 95  | -12.4322 | 1.00000 |
| 96  | -12.3788 | 1.00000 |
| 97  | -12.3243 | 1.00000 |
| 98  | -12.2092 | 1.00000 |
| 99  | -12.1989 | 1.00000 |
| 100 | -12.1643 | 1.00000 |
| 101 | -11.9455 | 1.00000 |
| 102 | -11.6825 | 1.00000 |
| 103 | -11.6116 | 1.00000 |
| 104 | -11.5926 | 1.00000 |
| 105 | -11.5707 | 1.00000 |

|     |          |         |
|-----|----------|---------|
| 106 | -11.0983 | 1.00000 |
| 107 | -11.0673 | 1.00000 |
| 108 | -10.8902 | 1.00000 |
| 109 | -10.8777 | 1.00000 |
| 110 | -10.8298 | 1.00000 |
| 111 | -10.7052 | 1.00000 |
| 112 | -10.6786 | 1.00000 |
| 113 | -10.6593 | 1.00000 |
| 114 | -10.6424 | 1.00000 |
| 115 | -10.5821 | 1.00000 |
| 116 | -10.5746 | 1.00000 |
| 117 | -10.5696 | 1.00000 |
| 118 | -10.5656 | 1.00000 |
| 119 | -10.5163 | 1.00000 |
| 120 | -10.5154 | 1.00000 |
| 121 | -10.5021 | 1.00000 |
| 122 | -10.4974 | 1.00000 |
| 123 | -10.3784 | 1.00000 |
| 124 | -10.2929 | 1.00000 |
| 125 | -10.2559 | 1.00000 |
| 126 | -10.1848 | 1.00000 |
| 127 | -10.1837 | 1.00000 |

|     |          |         |
|-----|----------|---------|
| 128 | -10.0541 | 1.00000 |
| 129 | -10.0171 | 1.00000 |
| 130 | -9.8884  | 1.00000 |
| 131 | -9.8630  | 1.00000 |
| 132 | -9.7860  | 1.00000 |
| 133 | -9.7777  | 1.00000 |
| 134 | -9.7516  | 1.00000 |
| 135 | -9.6898  | 1.00000 |
| 136 | -9.4476  | 1.00000 |
| 137 | -9.4226  | 1.00000 |
| 138 | -9.3847  | 1.00000 |
| 139 | -9.3797  | 1.00000 |
| 140 | -9.3725  | 1.00000 |
| 141 | -9.3601  | 1.00000 |
| 142 | -9.3084  | 1.00000 |
| 143 | -9.3011  | 1.00000 |
| 144 | -9.2972  | 1.00000 |
| 145 | -9.2831  | 1.00000 |
| 146 | -9.2482  | 1.00000 |
| 147 | -9.0902  | 1.00000 |
| 148 | -9.0009  | 1.00000 |
| 149 | -8.9800  | 1.00000 |

|     |         |         |
|-----|---------|---------|
| 150 | -8.9440 | 1.00000 |
| 151 | -8.9430 | 1.00000 |
| 152 | -8.7899 | 1.00000 |
| 153 | -8.7382 | 1.00000 |
| 154 | -8.7326 | 1.00000 |
| 155 | -8.7128 | 1.00000 |
| 156 | -8.7062 | 1.00000 |
| 157 | -8.6706 | 1.00000 |
| 158 | -8.6643 | 1.00000 |
| 159 | -8.6566 | 1.00000 |
| 160 | -8.6536 | 1.00000 |
| 161 | -8.5776 | 1.00000 |
| 162 | -8.5715 | 1.00000 |
| 163 | -8.5668 | 1.00000 |
| 164 | -8.5498 | 1.00000 |
| 165 | -8.4879 | 1.00000 |
| 166 | -8.4566 | 1.00000 |
| 167 | -8.4349 | 1.00000 |
| 168 | -8.3432 | 1.00000 |
| 169 | -8.2946 | 1.00000 |
| 170 | -8.2731 | 1.00000 |
| 171 | -8.2335 | 1.00000 |

|     |         |         |
|-----|---------|---------|
| 172 | -8.2300 | 1.00000 |
| 173 | -8.2280 | 1.00000 |
| 174 | -8.1421 | 1.00000 |
| 175 | -8.1344 | 1.00000 |
| 176 | -8.0750 | 1.00000 |
| 177 | -8.0422 | 1.00000 |
| 178 | -8.0138 | 1.00000 |
| 179 | -8.0074 | 1.00000 |
| 180 | -7.9686 | 1.00000 |
| 181 | -7.9599 | 1.00000 |
| 182 | -7.9214 | 1.00000 |
| 183 | -7.8913 | 1.00000 |
| 184 | -7.8717 | 1.00000 |
| 185 | -7.8640 | 1.00000 |
| 186 | -7.7924 | 1.00000 |
| 187 | -7.7885 | 1.00000 |
| 188 | -7.7383 | 1.00000 |
| 189 | -7.6795 | 1.00000 |
| 190 | -7.6363 | 1.00000 |
| 191 | -7.5981 | 1.00000 |
| 192 | -7.5774 | 1.00000 |
| 193 | -7.5550 | 1.00000 |

|     |         |         |
|-----|---------|---------|
| 194 | -7.5405 | 1.00000 |
| 195 | -7.4731 | 1.00000 |
| 196 | -7.4729 | 1.00000 |
| 197 | -7.4286 | 1.00000 |
| 198 | -7.3240 | 1.00000 |
| 199 | -7.2365 | 1.00000 |
| 200 | -7.1551 | 1.00000 |
| 201 | -7.0562 | 1.00000 |
| 202 | -7.0367 | 1.00000 |
| 203 | -7.0162 | 1.00000 |
| 204 | -6.9856 | 1.00000 |
| 205 | -6.9779 | 1.00000 |
| 206 | -6.9728 | 1.00000 |
| 207 | -6.9414 | 1.00000 |
| 208 | -6.8626 | 1.00000 |
| 209 | -6.8168 | 1.00000 |
| 210 | -6.7959 | 1.00000 |
| 211 | -6.7885 | 1.00000 |
| 212 | -6.7257 | 1.00000 |
| 213 | -6.6787 | 1.00000 |
| 214 | -6.4680 | 1.00000 |
| 215 | -6.3956 | 1.00000 |

|     |         |         |
|-----|---------|---------|
| 216 | -6.3832 | 1.00000 |
| 217 | -6.3789 | 1.00000 |
| 218 | -6.3634 | 1.00000 |
| 219 | -6.3389 | 1.00000 |
| 220 | -6.3039 | 1.00000 |
| 221 | -6.2762 | 1.00000 |
| 222 | -6.2299 | 1.00000 |
| 223 | -6.2286 | 1.00000 |
| 224 | -6.2227 | 1.00000 |
| 225 | -6.0473 | 1.00000 |
| 226 | -6.0094 | 1.00000 |
| 227 | -5.7569 | 1.00000 |
| 228 | -5.7116 | 1.00000 |
| 229 | -5.6926 | 1.00000 |
| 230 | -5.6362 | 1.00000 |
| 231 | -5.6235 | 1.00000 |
| 232 | -5.5445 | 1.00000 |
| 233 | -5.5237 | 1.00000 |
| 234 | -5.4415 | 1.00000 |
| 235 | -5.4123 | 1.00000 |
| 236 | -5.1442 | 1.00000 |
| 237 | -5.0605 | 1.00000 |

|     |         |         |
|-----|---------|---------|
| 238 | -5.0264 | 1.00000 |
| 239 | -5.0230 | 1.00000 |
| 240 | -4.9598 | 1.00000 |
| 241 | -4.8783 | 1.00000 |
| 242 | -4.8548 | 1.00000 |
| 243 | -4.8033 | 1.00000 |
| 244 | -4.7782 | 1.00000 |
| 245 | -4.6515 | 1.00000 |
| 246 | -4.5792 | 1.00000 |
| 247 | -4.5761 | 1.00000 |
| 248 | -4.4761 | 1.00000 |
| 249 | -4.4218 | 1.00000 |
| 250 | -4.3954 | 1.00000 |
| 251 | -4.2970 | 1.00000 |
| 252 | -4.2275 | 1.00000 |
| 253 | -4.1757 | 1.00000 |
| 254 | -3.5337 | 1.00000 |
| 255 | -3.3096 | 1.00000 |
| 256 | -3.1425 | 1.00000 |
| 257 | -2.9446 | 1.00000 |
| 258 | -2.7997 | 1.00000 |
| 259 | -2.7406 | 1.00000 |

|     |         |         |
|-----|---------|---------|
| 260 | -2.0614 | 0.00000 |
| 261 | -1.9150 | 0.00000 |
| 262 | -1.7234 | 0.00000 |
| 263 | -1.6797 | 0.00000 |
| 264 | -1.3082 | 0.00000 |
| 265 | -1.2825 | 0.00000 |
| 266 | -1.1613 | 0.00000 |
| 267 | -0.7233 | 0.00000 |
| 268 | -0.5843 | 0.00000 |
| 269 | -0.5108 | 0.00000 |
| 270 | -0.2811 | 0.00000 |
| 271 | -0.2781 | 0.00000 |
| 272 | -0.2604 | 0.00000 |
| 273 | -0.1570 | 0.00000 |
| 274 | -0.0590 | 0.00000 |
| 275 | -0.0486 | 0.00000 |
| 276 | 0.0128  | 0.00000 |
| 277 | 0.0396  | 0.00000 |
| 278 | 0.0783  | 0.00000 |
| 279 | 0.2078  | 0.00000 |
| 280 | 0.2554  | 0.00000 |
| 281 | 0.2791  | 0.00000 |

|     |        |         |
|-----|--------|---------|
| 282 | 0.4332 | 0.00000 |
| 283 | 0.4511 | 0.00000 |
| 284 | 0.4827 | 0.00000 |
| 285 | 0.6019 | 0.00000 |
| 286 | 0.6945 | 0.00000 |
| 287 | 0.8212 | 0.00000 |
| 288 | 0.8818 | 0.00000 |
| 289 | 1.0593 | 0.00000 |
| 290 | 1.1090 | 0.00000 |
| 291 | 1.1416 | 0.00000 |
| 292 | 1.1769 | 0.00000 |
| 293 | 1.2322 | 0.00000 |
| 294 | 1.2502 | 0.00000 |
| 295 | 1.3090 | 0.00000 |
| 296 | 1.3193 | 0.00000 |
| 297 | 1.3607 | 0.00000 |
| 298 | 1.4310 | 0.00000 |
| 299 | 1.4786 | 0.00000 |
| 300 | 1.4997 | 0.00000 |
| 301 | 1.5781 | 0.00000 |
| 302 | 1.6026 | 0.00000 |
| 303 | 1.6524 | 0.00000 |

|     |        |         |
|-----|--------|---------|
| 304 | 1.6866 | 0.00000 |
| 305 | 1.7581 | 0.00000 |
| 306 | 1.7730 | 0.00000 |
| 307 | 1.8786 | 0.00000 |
| 308 | 1.8995 | 0.00000 |
| 309 | 1.9077 | 0.00000 |
| 310 | 1.9222 | 0.00000 |
| 311 | 2.1386 | 0.00000 |
| 312 | 2.1985 | 0.00000 |
| 313 | 2.2199 | 0.00000 |
| 314 | 2.2530 | 0.00000 |
| 315 | 2.2892 | 0.00000 |
| 316 | 2.2965 | 0.00000 |
| 317 | 2.3368 | 0.00000 |
| 318 | 2.3610 | 0.00000 |
| 319 | 2.3824 | 0.00000 |
| 320 | 2.4080 | 0.00000 |
| 321 | 2.4284 | 0.00000 |
| 322 | 2.4354 | 0.00000 |
| 323 | 2.4518 | 0.00000 |
| 324 | 2.4573 | 0.00000 |
| 325 | 2.4676 | 0.00000 |

|     |        |         |
|-----|--------|---------|
| 326 | 2.5272 | 0.00000 |
| 327 | 2.5454 | 0.00000 |
| 328 | 2.7065 | 0.00000 |
| 329 | 2.7348 | 0.00000 |
| 330 | 2.7530 | 0.00000 |
| 331 | 2.7590 | 0.00000 |
| 332 | 2.7744 | 0.00000 |
| 333 | 2.8296 | 0.00000 |
| 334 | 2.8464 | 0.00000 |
| 335 | 2.8725 | 0.00000 |
| 336 | 2.9022 | 0.00000 |
| 337 | 2.9324 | 0.00000 |
| 338 | 2.9557 | 0.00000 |
| 339 | 2.9835 | 0.00000 |
| 340 | 3.0069 | 0.00000 |
| 341 | 3.0381 | 0.00000 |
| 342 | 3.0507 | 0.00000 |
| 343 | 3.0715 | 0.00000 |
| 344 | 3.0922 | 0.00000 |
| 345 | 3.1528 | 0.00000 |
| 346 | 3.1712 | 0.00000 |
| 347 | 3.1885 | 0.00000 |

|     |        |         |
|-----|--------|---------|
| 348 | 3.1998 | 0.00000 |
| 349 | 3.3080 | 0.00000 |
| 350 | 3.3275 | 0.00000 |
| 351 | 3.3616 | 0.00000 |
| 352 | 3.3711 | 0.00000 |
| 353 | 3.3932 | 0.00000 |
| 354 | 3.4384 | 0.00000 |
| 355 | 3.4817 | 0.00000 |
| 356 | 3.4913 | 0.00000 |
| 357 | 3.4939 | 0.00000 |
| 358 | 3.5047 | 0.00000 |
| 359 | 3.6394 | 0.00000 |
| 360 | 3.6769 | 0.00000 |
| 361 | 3.6999 | 0.00000 |
| 362 | 3.7381 | 0.00000 |
| 363 | 3.7550 | 0.00000 |
| 364 | 3.7603 | 0.00000 |
| 365 | 3.7774 | 0.00000 |
| 366 | 3.7985 | 0.00000 |
| 367 | 3.8144 | 0.00000 |
| 368 | 3.8406 | 0.00000 |
| 369 | 3.8472 | 0.00000 |

|     |        |         |
|-----|--------|---------|
| 370 | 3.8659 | 0.00000 |
| 371 | 3.8801 | 0.00000 |
| 372 | 3.8929 | 0.00000 |
| 373 | 3.9208 | 0.00000 |
| 374 | 3.9353 | 0.00000 |
| 375 | 3.9484 | 0.00000 |
| 376 | 3.9593 | 0.00000 |
| 377 | 3.9829 | 0.00000 |
| 378 | 3.9864 | 0.00000 |
| 379 | 4.0219 | 0.00000 |
| 380 | 4.0783 | 0.00000 |
| 381 | 4.1708 | 0.00000 |
| 382 | 4.2588 | 0.00000 |
| 383 | 4.2626 | 0.00000 |
| 384 | 4.2698 | 0.00000 |
| 385 | 4.2931 | 0.00000 |
| 386 | 4.3219 | 0.00000 |
| 387 | 4.3349 | 0.00000 |
| 388 | 4.3509 | 0.00000 |
| 389 | 4.3808 | 0.00000 |
| 390 | 4.3857 | 0.00000 |
| 391 | 4.4231 | 0.00000 |

|     |        |         |
|-----|--------|---------|
| 392 | 4.4492 | 0.00000 |
| 393 | 4.4745 | 0.00000 |
| 394 | 4.4831 | 0.00000 |
| 395 | 4.4927 | 0.00000 |
| 396 | 4.4996 | 0.00000 |
| 397 | 4.5205 | 0.00000 |
| 398 | 4.5553 | 0.00000 |
| 399 | 4.5931 | 0.00000 |
| 400 | 4.6108 | 0.00000 |
| 401 | 4.6287 | 0.00000 |
| 402 | 4.6458 | 0.00000 |
| 403 | 4.6597 | 0.00000 |
| 404 | 4.6854 | 0.00000 |
| 405 | 4.7087 | 0.00000 |
| 406 | 4.7371 | 0.00000 |
| 407 | 4.7515 | 0.00000 |
| 408 | 4.7705 | 0.00000 |
| 409 | 4.7867 | 0.00000 |
| 410 | 4.7895 | 0.00000 |
| 411 | 4.8031 | 0.00000 |
| 412 | 4.8326 | 0.00000 |
| 413 | 4.8690 | 0.00000 |

|     |        |         |
|-----|--------|---------|
| 414 | 4.8846 | 0.00000 |
| 415 | 4.9037 | 0.00000 |
| 416 | 4.9423 | 0.00000 |
| 417 | 4.9935 | 0.00000 |
| 418 | 5.0096 | 0.00000 |
| 419 | 5.0132 | 0.00000 |
| 420 | 5.0383 | 0.00000 |
| 421 | 5.0441 | 0.00000 |
| 422 | 5.0686 | 0.00000 |
| 423 | 5.0857 | 0.00000 |
| 424 | 5.1176 | 0.00000 |
| 425 | 5.1220 | 0.00000 |
| 426 | 5.1412 | 0.00000 |
| 427 | 5.1442 | 0.00000 |
| 428 | 5.1700 | 0.00000 |
| 429 | 5.1796 | 0.00000 |
| 430 | 5.1887 | 0.00000 |
| 431 | 5.1931 | 0.00000 |
| 432 | 5.2213 | 0.00000 |
| 433 | 5.2378 | 0.00000 |
| 434 | 5.2447 | 0.00000 |
| 435 | 5.2615 | 0.00000 |

|     |        |         |
|-----|--------|---------|
| 436 | 5.2979 | 0.00000 |
| 437 | 5.3026 | 0.00000 |
| 438 | 5.3119 | 0.00000 |
| 439 | 5.3363 | 0.00000 |
| 440 | 5.3530 | 0.00000 |
| 441 | 5.3708 | 0.00000 |
| 442 | 5.3818 | 0.00000 |
| 443 | 5.3950 | 0.00000 |
| 444 | 5.4294 | 0.00000 |
| 445 | 5.4594 | 0.00000 |
| 446 | 5.4697 | 0.00000 |
| 447 | 5.4871 | 0.00000 |
| 448 | 5.4988 | 0.00000 |
| 449 | 5.5258 | 0.00000 |
| 450 | 5.5677 | 0.00000 |
| 451 | 5.5726 | 0.00000 |
| 452 | 5.5943 | 0.00000 |
| 453 | 5.6074 | 0.00000 |
| 454 | 5.6246 | 0.00000 |
| 455 | 5.6711 | 0.00000 |
| 456 | 5.6917 | 0.00000 |
| 457 | 5.7187 | 0.00000 |

|     |        |         |
|-----|--------|---------|
| 458 | 5.7280 | 0.00000 |
| 459 | 5.7493 | 0.00000 |
| 460 | 5.7643 | 0.00000 |
| 461 | 5.7906 | 0.00000 |
| 462 | 5.7934 | 0.00000 |
| 463 | 5.7991 | 0.00000 |
| 464 | 5.8054 | 0.00000 |
| 465 | 5.8218 | 0.00000 |
| 466 | 5.8280 | 0.00000 |
| 467 | 5.8602 | 0.00000 |
| 468 | 5.8668 | 0.00000 |
| 469 | 5.8843 | 0.00000 |
| 470 | 5.8928 | 0.00000 |
| 471 | 5.8943 | 0.00000 |
| 472 | 5.9093 | 0.00000 |
| 473 | 5.9371 | 0.00000 |
| 474 | 5.9533 | 0.00000 |
| 475 | 5.9678 | 0.00000 |
| 476 | 5.9933 | 0.00000 |
| 477 | 6.0151 | 0.00000 |
| 478 | 6.0618 | 0.00000 |
| 479 | 6.0848 | 0.00000 |

480      6.1509      0.00000

-----

soft charge-density along one line, spin component      1

          0           1           2           3           4           5           6           7

8           9

total charge-density along one line

soft charge-density along one line, spin component      2

          0           1           2           3           4           5           6           7

8           9

total charge-density along one line

pseudopotential strength for first ion, spin component:      1

-2.331   -4.014   -0.002   0.000   0.000

-4.014   -6.828   -0.006   0.000   -0.000

-0.002   -0.006   -0.336   -0.000   0.000

0.000   0.000   -0.000   -0.341   -0.000

0.000   -0.000   0.000   -0.000   -0.341

pseudopotential strength for first ion, spin component: 2

-2.331 -4.014 -0.002 0.000 0.000

-4.014 -6.828 -0.006 0.000 -0.000

-0.002 -0.006 -0.336 -0.000 0.000

0.000 0.000 -0.000 -0.341 -0.000

0.000 -0.000 0.000 -0.000 -0.341

total augmentation occupancy for first ion, spin component: 1

3.579 -0.646 0.444 -0.034 -0.000

-0.646 0.130 -0.082 0.006 0.000

0.444 -0.082 0.056 -0.003 -0.000

-0.034 0.006 -0.003 0.011 0.000

-0.000 0.000 -0.000 0.000 0.007

total augmentation occupancy for first ion, spin component: 2

-0.000 0.000 -0.000 0.000 0.000

0.000 -0.000 0.000 -0.000 -0.000

-0.000 0.000 -0.000 -0.000 -0.000

0.000 -0.000 -0.000 -0.000 -0.000

0.000 -0.000 -0.000 -0.000 -0.000

----- aborting loop because EDIFF is reached -----

total charge

| # of ion | s     | p     | d     | tot   |
|----------|-------|-------|-------|-------|
| 1        | 0.646 | 0.043 | 0.000 | 0.690 |
| 2        | 0.646 | 0.043 | 0.000 | 0.690 |
| 3        | 0.646 | 0.043 | 0.000 | 0.690 |
| 4        | 0.646 | 0.043 | 0.000 | 0.690 |
| 5        | 0.646 | 0.043 | 0.000 | 0.690 |
| 6        | 0.646 | 0.043 | 0.000 | 0.690 |
| 7        | 0.646 | 0.043 | 0.000 | 0.690 |
| 8        | 0.646 | 0.043 | 0.000 | 0.690 |
| 9        | 0.646 | 0.043 | 0.000 | 0.690 |
| 10       | 0.646 | 0.043 | 0.000 | 0.690 |
| 11       | 0.646 | 0.043 | 0.000 | 0.690 |
| 12       | 0.646 | 0.043 | 0.000 | 0.690 |
| 13       | 0.646 | 0.043 | 0.000 | 0.689 |
| 14       | 0.646 | 0.043 | 0.000 | 0.689 |

|    |       |       |       |       |
|----|-------|-------|-------|-------|
| 15 | 0.648 | 0.045 | 0.000 | 0.693 |
| 16 | 0.646 | 0.043 | 0.000 | 0.689 |
| 17 | 0.646 | 0.043 | 0.000 | 0.689 |
| 18 | 0.646 | 0.043 | 0.000 | 0.689 |
| 19 | 0.646 | 0.043 | 0.000 | 0.689 |
| 20 | 0.646 | 0.043 | 0.000 | 0.689 |
| 21 | 0.646 | 0.043 | 0.000 | 0.689 |
| 22 | 0.646 | 0.044 | 0.000 | 0.690 |
| 23 | 0.541 | 0.015 | 0.000 | 0.557 |
| 24 | 0.541 | 0.015 | 0.000 | 0.556 |
| 25 | 0.870 | 1.763 | 0.000 | 2.633 |
| 26 | 0.867 | 1.785 | 0.000 | 2.653 |
| 27 | 0.867 | 1.786 | 0.000 | 2.653 |
| 28 | 0.870 | 1.762 | 0.000 | 2.632 |
| 29 | 0.865 | 1.783 | 0.000 | 2.648 |
| 30 | 0.870 | 1.763 | 0.000 | 2.633 |
| 31 | 0.867 | 1.786 | 0.000 | 2.653 |
| 32 | 0.867 | 1.786 | 0.000 | 2.653 |
| 33 | 0.870 | 1.762 | 0.000 | 2.632 |
| 34 | 0.865 | 1.783 | 0.000 | 2.648 |
| 35 | 0.870 | 1.763 | 0.000 | 2.633 |
| 36 | 0.868 | 1.787 | 0.000 | 2.654 |

|    |       |       |       |       |
|----|-------|-------|-------|-------|
| 37 | 0.867 | 1.786 | 0.000 | 2.653 |
| 38 | 0.870 | 1.763 | 0.000 | 2.633 |
| 39 | 0.865 | 1.784 | 0.000 | 2.649 |
| 40 | 0.870 | 1.763 | 0.000 | 2.633 |
| 41 | 0.868 | 1.787 | 0.000 | 2.655 |
| 42 | 0.867 | 1.786 | 0.000 | 2.653 |
| 43 | 0.871 | 1.764 | 0.000 | 2.634 |
| 44 | 0.865 | 1.783 | 0.000 | 2.648 |
| 45 | 0.870 | 1.763 | 0.000 | 2.633 |
| 46 | 0.867 | 1.786 | 0.000 | 2.653 |
| 47 | 0.867 | 1.786 | 0.000 | 2.653 |
| 48 | 0.871 | 1.763 | 0.000 | 2.634 |
| 49 | 0.865 | 1.783 | 0.000 | 2.648 |
| 50 | 0.870 | 1.763 | 0.000 | 2.633 |
| 51 | 0.867 | 1.786 | 0.000 | 2.653 |
| 52 | 0.867 | 1.786 | 0.000 | 2.653 |
| 53 | 0.870 | 1.762 | 0.000 | 2.632 |
| 54 | 0.865 | 1.784 | 0.000 | 2.648 |
| 55 | 0.865 | 1.784 | 0.000 | 2.649 |
| 56 | 0.865 | 1.786 | 0.000 | 2.651 |
| 57 | 0.866 | 1.787 | 0.000 | 2.653 |
| 58 | 0.866 | 1.790 | 0.000 | 2.656 |

|    |       |       |       |       |
|----|-------|-------|-------|-------|
| 59 | 0.865 | 1.786 | 0.000 | 2.651 |
| 60 | 0.866 | 1.786 | 0.000 | 2.651 |
| 61 | 0.866 | 1.788 | 0.000 | 2.654 |
| 62 | 0.867 | 1.791 | 0.000 | 2.658 |
| 63 | 0.865 | 1.784 | 0.000 | 2.649 |
| 64 | 0.865 | 1.786 | 0.000 | 2.651 |
| 65 | 0.866 | 1.787 | 0.000 | 2.652 |
| 66 | 0.865 | 1.788 | 0.000 | 2.653 |
| 67 | 0.865 | 1.786 | 0.000 | 2.651 |
| 68 | 0.866 | 1.785 | 0.000 | 2.651 |
| 69 | 0.865 | 1.787 | 0.000 | 2.652 |
| 70 | 0.866 | 1.787 | 0.000 | 2.653 |
| 71 | 0.865 | 1.784 | 0.000 | 2.649 |
| 72 | 0.865 | 1.786 | 0.000 | 2.651 |
| 73 | 0.866 | 1.786 | 0.000 | 2.652 |
| 74 | 0.864 | 1.785 | 0.000 | 2.649 |
| 75 | 0.865 | 1.786 | 0.000 | 2.651 |
| 76 | 0.866 | 1.786 | 0.000 | 2.651 |
| 77 | 0.865 | 1.786 | 0.000 | 2.651 |
| 78 | 0.865 | 1.784 | 0.000 | 2.649 |
| 79 | 0.865 | 1.784 | 0.000 | 2.649 |
| 80 | 0.865 | 1.786 | 0.000 | 2.651 |

|     |       |       |       |       |
|-----|-------|-------|-------|-------|
| 81  | 0.865 | 1.785 | 0.000 | 2.650 |
| 82  | 0.863 | 1.782 | 0.000 | 2.645 |
| 83  | 0.865 | 1.786 | 0.000 | 2.651 |
| 84  | 0.866 | 1.786 | 0.000 | 2.651 |
| 85  | 0.865 | 1.784 | 0.000 | 2.648 |
| 86  | 0.862 | 1.774 | 0.000 | 2.636 |
| 87  | 0.865 | 1.784 | 0.000 | 2.649 |
| 88  | 0.865 | 1.787 | 0.000 | 2.652 |
| 89  | 0.865 | 1.785 | 0.000 | 2.650 |
| 90  | 0.865 | 1.788 | 0.000 | 2.653 |
| 91  | 0.865 | 1.786 | 0.000 | 2.651 |
| 92  | 0.866 | 1.786 | 0.000 | 2.651 |
| 93  | 0.864 | 1.783 | 0.000 | 2.647 |
| 94  | 0.866 | 1.785 | 0.000 | 2.651 |
| 95  | 0.865 | 1.784 | 0.000 | 2.649 |
| 96  | 0.865 | 1.786 | 0.000 | 2.651 |
| 97  | 0.866 | 1.787 | 0.000 | 2.653 |
| 98  | 0.866 | 1.789 | 0.000 | 2.655 |
| 99  | 0.865 | 1.786 | 0.000 | 2.651 |
| 100 | 0.866 | 1.786 | 0.000 | 2.651 |
| 101 | 0.865 | 1.787 | 0.000 | 2.652 |
| 102 | 0.867 | 1.790 | 0.000 | 2.657 |

|     |       |       |       |       |
|-----|-------|-------|-------|-------|
| 103 | 0.865 | 1.786 | 0.000 | 2.651 |
| 104 | 0.867 | 1.785 | 0.000 | 2.653 |
| 105 | 0.866 | 1.786 | 0.000 | 2.652 |
| 106 | 0.870 | 1.778 | 0.000 | 2.648 |
| 107 | 0.869 | 1.765 | 0.000 | 2.635 |
| 108 | 0.865 | 1.783 | 0.000 | 2.648 |
| 109 | 0.869 | 1.789 | 0.000 | 2.658 |
| 110 | 0.865 | 1.786 | 0.000 | 2.651 |
| 111 | 0.867 | 1.785 | 0.000 | 2.653 |
| 112 | 0.867 | 1.789 | 0.000 | 2.655 |
| 113 | 0.871 | 1.782 | 0.000 | 2.653 |
| 114 | 0.869 | 1.765 | 0.000 | 2.634 |
| 115 | 0.865 | 1.783 | 0.000 | 2.648 |
| 116 | 0.870 | 1.791 | 0.000 | 2.661 |
| 117 | 0.865 | 1.786 | 0.000 | 2.651 |
| 118 | 0.867 | 1.786 | 0.000 | 2.653 |
| 119 | 0.865 | 1.782 | 0.000 | 2.647 |
| 120 | 0.857 | 1.707 | 0.000 | 2.564 |
| 121 | 0.869 | 1.765 | 0.000 | 2.634 |
| 122 | 0.865 | 1.783 | 0.000 | 2.648 |
| 123 | 0.866 | 1.778 | 0.000 | 2.644 |
| 124 | 0.866 | 1.786 | 0.000 | 2.652 |

|     |       |       |       |       |
|-----|-------|-------|-------|-------|
| 125 | 0.868 | 1.785 | 0.000 | 2.653 |
| 126 | 0.862 | 1.776 | 0.000 | 2.638 |
| 127 | 0.849 | 1.831 | 0.000 | 2.680 |
| 128 | 0.870 | 1.767 | 0.000 | 2.637 |
| 129 | 0.865 | 1.783 | 0.000 | 2.648 |
| 130 | 0.861 | 1.757 | 0.000 | 2.618 |
| 131 | 0.866 | 1.786 | 0.000 | 2.652 |
| 132 | 0.867 | 1.784 | 0.000 | 2.652 |
| 133 | 0.864 | 1.787 | 0.000 | 2.651 |
| 134 | 0.869 | 1.789 | 0.000 | 2.659 |
| 135 | 0.869 | 1.767 | 0.000 | 2.636 |
| 136 | 0.865 | 1.783 | 0.000 | 2.648 |
| 137 | 0.866 | 1.772 | 0.000 | 2.637 |
| 138 | 0.866 | 1.786 | 0.000 | 2.652 |
| 139 | 0.867 | 1.785 | 0.000 | 2.652 |
| 140 | 0.866 | 1.788 | 0.000 | 2.653 |
| 141 | 0.870 | 1.779 | 0.000 | 2.649 |
| 142 | 0.869 | 1.766 | 0.000 | 2.635 |
| 143 | 0.865 | 1.783 | 0.000 | 2.648 |
| 144 | 0.869 | 1.790 | 0.000 | 2.659 |
| 145 | 0.941 | 1.717 | 0.000 | 2.658 |
| 146 | 1.240 | 1.546 | 0.075 | 2.860 |

|     |       |       |       |       |
|-----|-------|-------|-------|-------|
| 147 | 1.633 | 3.524 | 0.000 | 5.157 |
|-----|-------|-------|-------|-------|

-----

|     |         |         |       |         |
|-----|---------|---------|-------|---------|
| tot | 123.062 | 221.545 | 0.075 | 344.681 |
|-----|---------|---------|-------|---------|

magnetization (x)

| # of ion | s | p | d | tot |
|----------|---|---|---|-----|
|----------|---|---|---|-----|

-----

|    |        |        |       |        |
|----|--------|--------|-------|--------|
| 1  | 0.000  | -0.000 | 0.000 | 0.000  |
| 2  | -0.000 | 0.000  | 0.000 | -0.000 |
| 3  | 0.000  | -0.000 | 0.000 | 0.000  |
| 4  | -0.000 | 0.000  | 0.000 | -0.000 |
| 5  | 0.000  | -0.000 | 0.000 | 0.000  |
| 6  | -0.000 | 0.000  | 0.000 | -0.000 |
| 7  | 0.000  | -0.000 | 0.000 | 0.000  |
| 8  | -0.000 | 0.000  | 0.000 | -0.000 |
| 9  | 0.000  | -0.000 | 0.000 | 0.000  |
| 10 | -0.000 | 0.000  | 0.000 | -0.000 |
| 11 | 0.000  | -0.000 | 0.000 | 0.000  |
| 12 | -0.000 | 0.000  | 0.000 | -0.000 |

|    |        |        |       |        |
|----|--------|--------|-------|--------|
| 13 | 0.000  | -0.000 | 0.000 | 0.000  |
| 14 | -0.004 | 0.002  | 0.000 | -0.002 |
| 15 | 0.000  | -0.000 | 0.000 | 0.000  |
| 16 | -0.004 | 0.002  | 0.000 | -0.002 |
| 17 | -0.004 | 0.002  | 0.000 | -0.002 |
| 18 | 0.000  | -0.000 | 0.000 | 0.000  |
| 19 | -0.003 | 0.001  | 0.000 | -0.002 |
| 20 | 0.000  | -0.000 | 0.000 | 0.000  |
| 21 | -0.003 | 0.002  | 0.000 | -0.002 |
| 22 | -0.003 | 0.002  | 0.000 | -0.002 |
| 23 | -0.000 | 0.000  | 0.000 | -0.000 |
| 24 | -0.000 | 0.000  | 0.000 | -0.000 |
| 25 | -0.000 | -0.007 | 0.000 | -0.008 |
| 26 | -0.000 | -0.002 | 0.000 | -0.002 |
| 27 | 0.000  | 0.003  | 0.000 | 0.003  |
| 28 | 0.000  | 0.005  | 0.000 | 0.005  |
| 29 | 0.000  | 0.003  | 0.000 | 0.003  |
| 30 | -0.000 | -0.007 | 0.000 | -0.008 |
| 31 | -0.000 | -0.002 | 0.000 | -0.002 |
| 32 | 0.000  | 0.003  | 0.000 | 0.003  |
| 33 | 0.000  | 0.005  | 0.000 | 0.005  |
| 34 | 0.000  | 0.002  | 0.000 | 0.002  |

|    |        |        |       |        |
|----|--------|--------|-------|--------|
| 35 | -0.000 | -0.007 | 0.000 | -0.008 |
| 36 | -0.000 | -0.002 | 0.000 | -0.002 |
| 37 | 0.000  | 0.003  | 0.000 | 0.003  |
| 38 | 0.000  | 0.006  | 0.000 | 0.007  |
| 39 | 0.000  | 0.002  | 0.000 | 0.002  |
| 40 | -0.000 | -0.007 | 0.000 | -0.008 |
| 41 | -0.000 | -0.002 | 0.000 | -0.002 |
| 42 | 0.000  | 0.002  | 0.000 | 0.003  |
| 43 | 0.000  | 0.005  | 0.000 | 0.006  |
| 44 | 0.000  | 0.004  | 0.000 | 0.004  |
| 45 | -0.000 | -0.007 | 0.000 | -0.008 |
| 46 | -0.000 | -0.002 | 0.000 | -0.002 |
| 47 | 0.000  | 0.003  | 0.000 | 0.003  |
| 48 | 0.000  | 0.005  | 0.000 | 0.006  |
| 49 | 0.000  | 0.001  | 0.000 | 0.002  |
| 50 | -0.000 | -0.007 | 0.000 | -0.008 |
| 51 | -0.000 | -0.002 | 0.000 | -0.002 |
| 52 | 0.000  | 0.002  | 0.000 | 0.003  |
| 53 | 0.000  | 0.006  | 0.000 | 0.007  |
| 54 | 0.000  | 0.002  | 0.000 | 0.002  |
| 55 | -0.000 | -0.005 | 0.000 | -0.006 |
| 56 | -0.000 | -0.007 | 0.000 | -0.007 |

|    |        |        |       |        |
|----|--------|--------|-------|--------|
| 57 | -0.000 | -0.001 | 0.000 | -0.001 |
| 58 | -0.000 | -0.001 | 0.000 | -0.001 |
| 59 | 0.000  | 0.006  | 0.000 | 0.007  |
| 60 | 0.000  | 0.003  | 0.000 | 0.003  |
| 61 | 0.000  | 0.001  | 0.000 | 0.001  |
| 62 | 0.000  | 0.003  | 0.000 | 0.003  |
| 63 | -0.000 | -0.005 | 0.000 | -0.006 |
| 64 | -0.000 | -0.007 | 0.000 | -0.007 |
| 65 | -0.000 | -0.001 | 0.000 | -0.001 |
| 66 | -0.000 | -0.001 | 0.000 | -0.001 |
| 67 | 0.000  | 0.006  | 0.000 | 0.006  |
| 68 | 0.000  | 0.003  | 0.000 | 0.003  |
| 69 | 0.000  | 0.001  | 0.000 | 0.001  |
| 70 | 0.000  | 0.002  | 0.000 | 0.002  |
| 71 | -0.000 | -0.005 | 0.000 | -0.006 |
| 72 | -0.000 | -0.007 | 0.000 | -0.007 |
| 73 | -0.000 | -0.001 | 0.000 | -0.001 |
| 74 | -0.000 | -0.002 | 0.000 | -0.002 |
| 75 | 0.000  | 0.006  | 0.000 | 0.007  |
| 76 | 0.000  | 0.003  | 0.000 | 0.004  |
| 77 | 0.000  | 0.003  | 0.000 | 0.003  |
| 78 | 0.000  | 0.001  | 0.000 | 0.001  |

|     |        |        |       |        |
|-----|--------|--------|-------|--------|
| 79  | -0.000 | -0.005 | 0.000 | -0.006 |
| 80  | -0.000 | -0.007 | 0.000 | -0.007 |
| 81  | -0.000 | -0.001 | 0.000 | -0.002 |
| 82  | -0.000 | -0.002 | 0.000 | -0.002 |
| 83  | 0.001  | 0.007  | 0.000 | 0.008  |
| 84  | 0.000  | 0.003  | 0.000 | 0.003  |
| 85  | 0.000  | 0.002  | 0.000 | 0.002  |
| 86  | 0.000  | 0.005  | 0.000 | 0.006  |
| 87  | -0.000 | -0.005 | 0.000 | -0.005 |
| 88  | -0.000 | -0.007 | 0.000 | -0.007 |
| 89  | -0.000 | -0.001 | 0.000 | -0.002 |
| 90  | -0.000 | -0.002 | 0.000 | -0.002 |
| 91  | 0.001  | 0.008  | 0.000 | 0.008  |
| 92  | 0.000  | 0.003  | 0.000 | 0.003  |
| 93  | 0.000  | 0.002  | 0.000 | 0.003  |
| 94  | 0.000  | 0.001  | 0.000 | 0.001  |
| 95  | -0.000 | -0.005 | 0.000 | -0.006 |
| 96  | -0.000 | -0.007 | 0.000 | -0.007 |
| 97  | -0.000 | -0.001 | 0.000 | -0.001 |
| 98  | -0.000 | -0.001 | 0.000 | -0.001 |
| 99  | 0.001  | 0.007  | 0.000 | 0.007  |
| 100 | 0.000  | 0.003  | 0.000 | 0.004  |

|     |        |        |       |        |
|-----|--------|--------|-------|--------|
| 101 | 0.000  | 0.003  | 0.000 | 0.003  |
| 102 | 0.000  | 0.002  | 0.000 | 0.002  |
| 103 | -0.001 | -0.010 | 0.000 | -0.011 |
| 104 | -0.003 | -0.028 | 0.000 | -0.031 |
| 105 | -0.000 | -0.001 | 0.000 | -0.002 |
| 106 | -0.000 | -0.004 | 0.000 | -0.005 |
| 107 | 0.007  | 0.116  | 0.000 | 0.122  |
| 108 | 0.001  | 0.010  | 0.000 | 0.011  |
| 109 | 0.000  | 0.001  | 0.000 | 0.001  |
| 110 | -0.001 | -0.010 | 0.000 | -0.011 |
| 111 | -0.003 | -0.028 | 0.000 | -0.031 |
| 112 | -0.000 | -0.001 | 0.000 | -0.002 |
| 113 | -0.000 | -0.003 | 0.000 | -0.004 |
| 114 | 0.007  | 0.120  | 0.000 | 0.127  |
| 115 | 0.001  | 0.010  | 0.000 | 0.011  |
| 116 | 0.000  | 0.001  | 0.000 | 0.002  |
| 117 | -0.001 | -0.010 | 0.000 | -0.011 |
| 118 | -0.003 | -0.026 | 0.000 | -0.029 |
| 119 | -0.000 | -0.002 | 0.000 | -0.002 |
| 120 | -0.000 | -0.002 | 0.000 | -0.002 |
| 121 | 0.007  | 0.115  | 0.000 | 0.122  |
| 122 | 0.001  | 0.010  | 0.000 | 0.010  |

|     |        |        |       |        |
|-----|--------|--------|-------|--------|
| 123 | 0.000  | 0.003  | 0.000 | 0.003  |
| 124 | -0.001 | -0.010 | 0.000 | -0.011 |
| 125 | -0.003 | -0.024 | 0.000 | -0.027 |
| 126 | -0.000 | -0.002 | 0.000 | -0.002 |
| 127 | -0.000 | 0.001  | 0.000 | 0.001  |
| 128 | 0.006  | 0.105  | 0.000 | 0.111  |
| 129 | 0.001  | 0.009  | 0.000 | 0.010  |
| 130 | 0.000  | 0.004  | 0.000 | 0.004  |
| 131 | -0.001 | -0.009 | 0.000 | -0.010 |
| 132 | -0.003 | -0.024 | 0.000 | -0.027 |
| 133 | -0.000 | -0.002 | 0.000 | -0.002 |
| 134 | -0.000 | -0.002 | 0.000 | -0.002 |
| 135 | 0.006  | 0.097  | 0.000 | 0.102  |
| 136 | 0.001  | 0.009  | 0.000 | 0.010  |
| 137 | 0.000  | 0.004  | 0.000 | 0.005  |
| 138 | -0.001 | -0.010 | 0.000 | -0.011 |
| 139 | -0.003 | -0.026 | 0.000 | -0.029 |
| 140 | -0.000 | -0.002 | 0.000 | -0.002 |
| 141 | -0.000 | -0.003 | 0.000 | -0.004 |
| 142 | 0.006  | 0.105  | 0.000 | 0.111  |
| 143 | 0.001  | 0.010  | 0.000 | 0.010  |
| 144 | 0.000  | 0.002  | 0.000 | 0.003  |

|       |        |       |        |       |
|-------|--------|-------|--------|-------|
| 145   | 0.000  | 0.005 | 0.000  | 0.006 |
| 146   | -0.000 | 0.000 | -0.000 | 0.000 |
| 147   | 0.000  | 0.004 | 0.000  | 0.004 |
| ----- |        |       |        |       |
| tot   | 0.001  | 0.513 | -0.000 | 0.514 |

|         |          |         |           |        |
|---------|----------|---------|-----------|--------|
| CHARGE: | cpu time | 0.5301: | real time | 0.5318 |
| FORLOC: | cpu time | 0.0199: | real time | 0.0199 |
| FORNL : | cpu time | 2.0332: | real time | 2.0409 |
| STRESS: | cpu time | 6.0849: | real time | 6.1062 |
| FORCOR: | cpu time | 0.1393: | real time | 0.1409 |
| FORHAR: | cpu time | 0.0334: | real time | 0.0334 |
| MIXING: | cpu time | 0.0103: | real time | 0.0103 |
| OFIELD: | cpu time | 0.0001: | real time | 0.0001 |

-----

DFTD3 V3.0 Rev 1

Edisp (eV) -6.61769

E6 (eV): -3.9313

E8 (eV): -2.6864

% E8 : 40.59

FORVDW: cpu time 1.7839: real time 1.8254

FORCE on cell =-STRESS in cart. coord. units (eV):

Direction XX YY ZZ XY YZ ZX

-----  
Alpha Z 233.50077 233.50077 233.50077

Ewald 107580.16656 23476.48833-39727.54653 11.67711 3454.27700 130.54156

Hartree106097.57444 25032.54912-23794.31468 -5.92948 2947.06020 94.14605

E(xc) -1914.22774 -1916.58352 -1979.89108 0.13644 1.81998 0.13693

Local \*\*\*\*\*-53957.63407 57015.63390 -2.12362 -6359.44743 -221.12070

n-local -472.64970 -482.44081 -439.52204 -0.74750 -0.68688 -0.36888

augment -38.29507 -38.58606 -34.30583 -0.00929 -0.97764 -0.00724

Kinetic 7635.01611 7638.84747 8713.95669 -3.15905 -41.56418 -3.23410

Fock 0.00000 0.00000 0.00000 0.00000 0.00000 0.00000

vdW -2.64276 -1.49206 -6.59296 0.00183 -0.07458 0.01212

-----  
Total -17.74921 -15.35083 -19.08177 -0.15356 0.40647 0.10575

in kB -4.89444 -4.23308 -5.26190 -0.04234 0.11209 0.02916

external pressure = -4.80 kB Pullay stress = 0.00 kB

VOLUME and BASIS-vectors are now :

-----

energy-cutoff : 400.00

volume of cell : 5810.14

direct lattice vectors

reciprocal lattice vectors

|              |              |              |             |             |             |
|--------------|--------------|--------------|-------------|-------------|-------------|
| 14.780600000 | 0.000000000  | 0.000000000  | 0.067656252 | 0.000000000 | 0.000000000 |
| 0.000000000  | 21.333900000 | 0.000000000  | 0.000000000 | 0.046873755 | 0.000000000 |
| 0.000000000  | 0.000000000  | 18.425700000 | 0.000000000 | 0.000000000 | 0.054272022 |

length of vectors

|              |              |              |             |             |             |
|--------------|--------------|--------------|-------------|-------------|-------------|
| 14.780600000 | 21.333900000 | 18.425700000 | 0.067656252 | 0.046873755 | 0.054272022 |
|--------------|--------------|--------------|-------------|-------------|-------------|

FORCES acting on ions

electron-ion (+dipol)

ewald-force

non-local-force

convergence-correction

-----

|           |           |           |           |           |           |           |           |   |
|-----------|-----------|-----------|-----------|-----------|-----------|-----------|-----------|---|
| 0.493E-02 | 0.154E+03 | 0.361E+02 | -.343E-02 | -.160E+03 | -.357E+02 | -.180E-02 | 0.566E+01 | - |
| .438E+00  | 0.170E-06 | -.416E-06 | -.154E-06 |           |           |           |           |   |
| -.181E-01 | 0.155E+03 | -.340E+02 | 0.157E-01 | -.160E+03 | 0.335E+02 | 0.116E-02 | 0.565E+01 |   |
| 0.541E+00 | 0.108E-05 | 0.442E-06 | 0.159E-06 |           |           |           |           |   |
| 0.185E+00 | 0.154E+03 | 0.360E+02 | -.185E+00 | -.160E+03 | -.356E+02 | 0.888E-05 | 0.565E+01 | - |

.443E+00 0.137E-06 -.820E-06 0.555E-06  
0.113E+00 0.155E+03 -.341E+02 -.993E-01 -.160E+03 0.336E+02 -.175E-01 0.565E+01  
0.535E+00 0.535E-06 -.628E-06 0.639E-06  
0.171E+00 0.154E+03 0.362E+02 -.173E+00 -.160E+03 -.357E+02 0.116E-02 0.566E+01 -  
.440E+00 -.438E-07 -.844E-06 0.508E-06  
0.126E+00 0.154E+03 -.340E+02 -.108E+00 -.160E+03 0.334E+02 -.211E-01 0.565E+01  
0.541E+00 -.542E-06 -.698E-06 0.543E-06  
-.196E-01 0.154E+03 0.363E+02 0.184E-01 -.160E+03 -.359E+02 0.159E-02 0.566E+01 -  
.431E+00 -.127E-06 -.511E-06 -.213E-06  
-.133E-01 0.154E+03 -.338E+02 0.202E-01 -.160E+03 0.332E+02 -.721E-02 0.565E+01  
0.555E+00 -.984E-06 0.199E-06 0.155E-07  
-.182E+00 0.154E+03 0.363E+02 0.182E+00 -.160E+03 -.359E+02 0.255E-03 0.566E+01 -  
.429E+00 -.142E-06 -.170E-06 -.901E-06  
-.128E+00 0.155E+03 -.337E+02 0.115E+00 -.160E+03 0.331E+02 0.109E-01 0.565E+01  
0.561E+00 -.541E-06 0.117E-05 -.423E-06  
-.174E+00 0.154E+03 0.362E+02 0.176E+00 -.160E+03 -.358E+02 -.177E-02 0.566E+01 -  
.432E+00 0.182E-08 -.666E-07 -.869E-06  
-.115E+00 0.155E+03 -.338E+02 0.958E-01 -.160E+03 0.332E+02 0.192E-01 0.565E+01  
0.555E+00 0.458E-06 0.133E-05 -.381E-06  
0.229E+01 -.150E+03 -.386E+02 -.228E+01 0.156E+03 0.386E+02 -.103E-01 -.566E+01  
0.767E-01 -.456E-06 0.276E-07 0.129E-06  
-.413E+00 -.151E+03 0.388E+02 0.414E+00 0.157E+03 -.386E+02 -.128E-02 -.567E+01 -

.269E+00    -.274E-06 0.262E-06 0.143E-06  
0.136E+02 -.146E+03 -.413E+02    -.139E+02 0.151E+03 0.413E+02    0.257E+00 -.567E+01 -  
.347E-01    0.667E-06 0.339E-06 0.611E-08  
0.163E+01 -.151E+03 0.402E+02    -.163E+01 0.156E+03 -.400E+02    -.998E-03 -.567E+01 -  
.229E+00    -.218E-06 -.109E-06 -.265E-06  
0.353E+01 -.149E+03 0.443E+02    -.352E+01 0.155E+03 -.441E+02    -.198E-02 -.567E+01 -  
.180E+00    0.203E-06 -.101E-06 -.122E-06  
-.148E+02 -.146E+03 -.330E+02    0.149E+02 0.151E+03 0.330E+02    -.937E-01 -.566E+01  
0.478E-01    0.126E-05 0.152E-06 -.503E-06  
-.298E+01 -.149E+03 0.432E+02    0.297E+01 0.155E+03 -.430E+02    0.114E-01 -.567E+01 -  
.241E+00    0.343E-07 0.361E-06 0.345E-06  
-.378E+01 -.150E+03 -.385E+02    0.378E+01 0.156E+03 0.385E+02    -.606E-02 -.566E+01  
0.239E-01    -.983E-07 0.351E-06 0.349E-06  
-.208E+01 -.151E+03 0.395E+02    0.207E+01 0.156E+03 -.392E+02    0.151E-02 -.566E+01 -  
.282E+00    0.861E-07 0.513E-06 0.218E-06  
0.708E-03 -.148E+03 0.486E+02    0.690E-02 0.154E+03 -.484E+02    -.554E-02 -.569E+01 -  
.158E+00    0.145E-06 0.816E-07 0.399E-06  
0.196E+02 -.103E+03 0.222E+02    -.212E+02 0.103E+03 -.246E+02    0.153E+01 0.138E+00  
0.238E+01    0.401E-06 0.162E-06 0.317E-06  
-.192E+02 -.103E+03 0.154E+02    0.216E+02 0.103E+03 -.169E+02    -.241E+01 -.119E+00  
0.152E+01    -.324E-06 0.468E-06 -.286E-06  
0.725E-01 0.461E+03 0.202E+03    -.757E-01 -.462E+03 -.201E+03    0.383E-02 0.102E+01 -

.219E+00    -.181E-06 -.152E-06 -.704E-07  
0.214E+00 0.353E+03 -.234E+03    -.214E+00 -.353E+03 0.234E+03    0.255E-02 0.443E+00 -  
.370E-01    0.108E-05 -.194E-05 0.158E-05  
-.241E-01 0.351E+03 0.240E+03    0.228E-01 -.351E+03 -.241E+03    0.315E-02 0.408E+00  
0.564E-01    -.495E-06 0.119E-05 -.991E-06  
-.171E+00 0.462E+03 -.195E+03    0.178E+00 -.463E+03 0.195E+03    -.663E-02 0.105E+01  
0.233E+00    0.242E-05 0.232E-06 0.107E-05  
-.590E-01 0.210E+03 -.272E+03    0.630E-01 -.210E+03 0.272E+03    -.446E-02 0.937E-01  
0.560E-01    0.170E-06 -.116E-05 0.104E-05  
0.563E+00 0.461E+03 0.202E+03    -.566E+00 -.462E+03 -.201E+03    0.202E-02 0.102E+01 -  
.214E+00    0.951E-07 -.123E-05 0.206E-05  
0.106E+01 0.352E+03 -.234E+03    -.107E+01 -.353E+03 0.234E+03    0.160E-01 0.448E+00 -  
.425E-01    -.799E-07 -.327E-05 0.181E-05  
0.414E+00 0.351E+03 0.240E+03    -.416E+00 -.351E+03 -.240E+03    0.303E-02 0.408E+00  
0.491E-01    -.284E-06 0.538E-06 0.104E-05  
0.580E+00 0.462E+03 -.195E+03    -.585E+00 -.463E+03 0.195E+03    0.478E-02 0.105E+01  
0.235E+00    0.109E-05 -.317E-05 0.226E-05  
0.691E+00 0.210E+03 -.272E+03    -.697E+00 -.210E+03 0.272E+03    0.594E-02 0.913E-01  
0.616E-01    -.870E-07 -.184E-05 0.110E-05  
0.426E+00 0.461E+03 0.202E+03    -.428E+00 -.462E+03 -.202E+03    0.384E-02 0.102E+01 -  
.214E+00    0.164E-06 -.143E-05 0.185E-05  
0.938E+00 0.352E+03 -.233E+03    -.954E+00 -.352E+03 0.233E+03    0.152E-01 0.441E+00 -

.377E-01    -.115E-05 -.190E-05 0.101E-05  
0.479E+00 0.351E+03 0.241E+03    -.481E+00 -.351E+03 -.241E+03    0.250E-02 0.406E+00

0.512E-01    0.799E-07 0.796E-07 0.190E-05  
0.705E+00 0.462E+03 -.194E+03    -.715E+00 -.463E+03 0.194E+03    0.789E-02 0.106E+01

0.242E+00    -.130E-05 -.313E-05 0.180E-05  
0.723E+00 0.210E+03 -.271E+03    -.732E+00 -.210E+03 0.271E+03    0.654E-02 0.911E-01

0.592E-01    -.276E-06 -.116E-05 0.635E-06  
-.183E+00 0.461E+03 0.202E+03    0.179E+00 -.462E+03 -.202E+03    0.448E-02 0.102E+01 -

.218E+00    0.222E-06 -.567E-06 -.400E-06  
-.296E+00 0.352E+03 -.233E+03    0.301E+00 -.352E+03 0.233E+03    -.233E-02 0.440E+00 -

.300E-01    -.971E-06 0.584E-06 -.631E-07  
0.397E-01 0.351E+03 0.241E+03    -.387E-01 -.351E+03 -.241E+03    0.223E-02 0.409E+00

0.558E-01    0.512E-06 0.263E-06 0.754E-06  
0.485E-01 0.462E+03 -.194E+03    -.546E-01 -.463E+03 0.194E+03    0.390E-02 0.106E+01

0.232E+00    -.219E-05 -.910E-07 0.357E-06  
-.512E-01 0.210E+03 -.271E+03    0.496E-01 -.210E+03 0.271E+03    -.306E-03 0.933E-01

0.324E-01    -.159E-06 0.220E-06 0.151E-06  
-.553E+00 0.461E+03 0.202E+03    0.551E+00 -.462E+03 -.202E+03    0.762E-03 0.102E+01 -

.220E+00    -.997E-07 0.382E-06 -.252E-05  
-.119E+01 0.352E+03 -.233E+03    0.120E+01 -.353E+03 0.233E+03    -.161E-01 0.447E+00 -

.330E-01    -.128E-07 0.197E-05 -.310E-06  
-.354E+00 0.351E+03 0.241E+03    0.351E+00 -.351E+03 -.241E+03    0.206E-02 0.413E+00

0.624E-01 0.276E-06 0.844E-06 -.128E-05  
-.413E+00 0.462E+03 -.194E+03 0.427E+00 -.463E+03 0.194E+03 -.115E-01 0.106E+01  
0.230E+00 -.114E-05 0.305E-05 -.714E-06  
-.563E+00 0.210E+03 -.271E+03 0.567E+00 -.210E+03 0.271E+03 -.930E-02 0.915E-01  
0.525E-01 0.161E-06 0.973E-06 0.131E-06  
-.475E+00 0.461E+03 0.202E+03 0.474E+00 -.462E+03 -.202E+03 0.307E-02 0.102E+01 -  
.220E+00 -.211E-06 0.681E-06 -.226E-05  
-.804E+00 0.353E+03 -.234E+03 0.819E+00 -.353E+03 0.234E+03 -.149E-01 0.447E+00 -  
.393E-01 0.109E-05 0.796E-06 0.453E-06  
-.374E+00 0.351E+03 0.241E+03 0.369E+00 -.351E+03 -.241E+03 0.964E-03 0.411E+00  
0.626E-01 -.980E-07 0.128E-05 -.216E-05  
-.594E+00 0.462E+03 -.194E+03 0.607E+00 -.463E+03 0.194E+03 -.169E-01 0.105E+01  
0.234E+00 0.121E-05 0.331E-05 -.479E-06  
-.586E+00 0.210E+03 -.272E+03 0.597E+00 -.210E+03 0.272E+03 -.102E-01 0.993E-01  
0.567E-01 0.161E-06 0.252E-06 0.492E-06  
-.777E-02 0.206E+03 0.279E+03 0.111E-01 -.206E+03 -.279E+03 -.360E-02 0.688E-01 -  
.412E-01 -.553E-06 0.874E-06 -.467E-06  
0.672E+00 0.303E+02 0.296E+03 -.667E+00 -.302E+02 -.296E+03 -.467E-02 -.409E-01  
0.755E-02 -.471E-06 0.592E-06 -.146E-06  
-.842E+00 0.144E+03 -.282E+03 0.844E+00 -.144E+03 0.282E+03 -.311E-02 0.137E+00  
0.286E-01 -.993E-07 -.197E-06 0.563E-06  
0.544E+00 -.215E+02 -.285E+03 -.544E+00 0.214E+02 0.285E+03 -.919E-03 0.388E-01

0.185E-01 - .684E-06 -.113E-06 0.133E-06  
0.502E+00 -.294E+02 0.293E+03 -.499E+00 0.294E+02 -.293E+03 -.552E-02 0.255E-01 -  
.303E-01 -.193E-06 0.291E-06 -.172E-07  
0.526E+00 0.139E+03 0.289E+03 -.527E+00 -.139E+03 -.289E+03 0.179E-02 0.104E+00 -  
.248E-01 -.693E-06 0.778E-06 0.541E-07  
-.126E+01 0.364E+02 -.287E+03 0.126E+01 -.364E+02 0.287E+03 -.766E-04 -.739E-02  
0.136E-01 -.505E-06 0.152E-06 0.141E-06  
0.169E+01 -.130E+03 -.271E+03 -.170E+01 0.130E+03 0.271E+03 0.105E-01 -.877E-01  
0.371E-01 -.115E-05 0.266E-06 -.621E-07  
0.399E+00 0.207E+03 0.280E+03 -.397E+00 -.207E+03 -.280E+03 0.706E-03 0.696E-01 -  
.370E-01 -.593E-06 0.951E-06 0.661E-06  
0.923E+00 0.312E+02 0.296E+03 -.927E+00 -.311E+02 -.296E+03 0.225E-02 -.409E-01  
0.122E-01 -.305E-06 0.908E-06 -.173E-06  
0.133E+01 0.144E+03 -.282E+03 -.134E+01 -.144E+03 0.282E+03 0.503E-02 0.126E+00  
0.279E-01 -.172E-06 -.101E-05 0.922E-06  
0.342E+01 -.199E+02 -.285E+03 -.344E+01 0.199E+02 0.285E+03 0.133E-01 0.416E-01  
0.136E-01 -.202E-06 -.176E-06 0.185E-06  
0.140E+01 -.287E+02 0.294E+03 -.139E+01 0.287E+02 -.294E+03 -.348E-02 0.253E-01 -  
.307E-01 -.317E-06 0.762E-06 -.447E-06  
0.680E+00 0.139E+03 0.290E+03 -.680E+00 -.139E+03 -.290E+03 0.617E-03 0.103E+00 -  
.295E-01 -.257E-06 0.925E-06 0.675E-06  
0.161E+01 0.367E+02 -.287E+03 -.160E+01 -.367E+02 0.287E+03 -.130E-01 -.205E-01

0.129E-01 - .487E-06 -.439E-06 0.458E-06  
0.613E+01 -.125E+03 -.271E+03 -.615E+01 0.125E+03 0.271E+03 0.215E-01 -.893E-01

0.143E-01 0.611E-07 0.501E-07 -.251E-06  
0.368E+00 0.207E+03 0.280E+03 -.373E+00 -.207E+03 -.280E+03 0.106E-03 0.685E-01 -  
.365E-01 0.543E-07 0.899E-06 0.113E-05  
-.375E-01 0.319E+02 0.296E+03 0.288E-01 -.318E+02 -.296E+03 0.105E-01 -.361E-01

0.139E-01 0.217E-06 0.724E-06 -.205E-06  
0.210E+01 0.144E+03 -.281E+03 -.211E+01 -.144E+03 0.281E+03 0.119E-01 0.120E+00 -

0.240E-01 -.785E-07 -.118E-05 0.688E-06  
0.303E+01 -.171E+02 -.283E+03 -.305E+01 0.171E+02 0.283E+03 0.241E-01 0.852E-01

0.609E-01 0.489E-06 0.215E-06 0.991E-08  
0.106E+01 -.272E+02 0.294E+03 -.106E+01 0.272E+02 -.294E+03 0.289E-02 0.244E-01 -  
.376E-01 -.141E-06 0.844E-06 -.593E-06  
0.965E-01 0.140E+03 0.290E+03 -.981E-01 -.140E+03 -.290E+03 0.131E-02 0.107E+00 -  
.232E-01 0.323E-06 0.787E-06 0.581E-06  
0.277E+01 0.387E+02 -.286E+03 -.277E+01 -.387E+02 0.286E+03 0.632E-03 -.114E-01

0.290E-01 0.704E-07 -.470E-06 0.273E-06  
0.596E+01 -.115E+03 -.267E+03 -.611E+01 0.115E+03 0.267E+03 0.149E+00 -.269E-02

0.131E+00 0.802E-06 0.101E-05 -.972E-07  
-.243E+00 0.207E+03 0.280E+03 0.241E+00 -.207E+03 -.280E+03 0.438E-02 0.717E-01 -  
.387E-01 0.652E-06 0.812E-06 0.462E-06  
-.115E+01 0.314E+02 0.294E+03 0.114E+01 -.314E+02 -.294E+03 0.917E-02 -.311E-01

0.546E-02 0.451E-06 0.304E-06 -.171E-06  
0.590E+00 0.144E+03 -.281E+03 -.607E+00 -.144E+03 0.281E+03 0.177E-01 0.126E+00  
0.437E-01 0.136E-06 -.338E-06 0.253E-06  
-.956E+00 -.159E+02 -.286E+03 0.949E+00 0.158E+02 0.285E+03 0.583E-02 0.906E-01  
0.802E-01 0.119E-05 0.363E-06 0.263E-06  
-.646E+00 -.265E+02 0.293E+03 0.642E+00 0.265E+02 -.293E+03 0.491E-02 0.235E-01 -  
.270E-01 0.243E-06 0.524E-06 -.372E-06  
-.537E+00 0.139E+03 0.289E+03 0.532E+00 -.139E+03 -.289E+03 0.654E-02 0.114E+00 -  
.213E-01 0.648E-06 0.527E-06 -.129E-06  
0.769E+00 0.408E+02 -.287E+03 -.781E+00 -.408E+02 0.287E+03 0.534E-02 0.183E-02 -  
.192E-01 0.672E-06 -.536E-08 0.733E-07  
-.511E+00 -.113E+03 -.276E+03 0.472E+00 0.113E+03 0.276E+03 0.386E-01 0.599E-01 -  
.269E+00 0.499E-06 -.985E-07 0.515E-06  
-.574E+00 0.206E+03 0.279E+03 0.572E+00 -.206E+03 -.279E+03 0.113E-02 0.721E-01 -  
.455E-01 0.479E-06 0.698E-06 -.666E-06  
-.787E+00 0.304E+02 0.294E+03 0.791E+00 -.304E+02 -.294E+03 -.755E-02 -.308E-01 -  
.138E-02 0.266E-06 0.484E-07 -.134E-06  
-.123E+01 0.144E+03 -.281E+03 0.125E+01 -.145E+03 0.281E+03 -.158E-01 0.122E+00  
0.504E-01 0.161E-06 0.847E-06 0.905E-07  
-.366E+01 -.174E+02 -.283E+03 0.369E+01 0.173E+02 0.283E+03 -.310E-01 0.118E+00  
0.583E-01 0.553E-07 0.912E-06 0.430E-06  
-.130E+01 -.277E+02 0.291E+03 0.130E+01 0.277E+02 -.291E+03 -.132E-02 0.341E-01 -

.219E-01 0.290E-06 0.134E-07 -.179E-07  
-.350E+00 0.139E+03 0.289E+03 0.349E+00 -.139E+03 -.289E+03 0.117E-04 0.112E+00 -  
.146E-01 0.294E-06 0.417E-06 -.701E-06  
-.838E+00 0.400E+02 -.287E+03 0.830E+00 -.400E+02 0.287E+03 0.129E-01 -.735E-02 -  
.183E-01 0.327E-06 0.764E-06 0.283E-06  
-.785E+01 -.119E+03 -.267E+03 0.805E+01 0.119E+03 0.267E+03 -.194E+00 0.726E-02  
0.339E-01 0.438E-06 0.845E-06 0.109E-05  
-.410E+00 0.206E+03 0.279E+03 0.411E+00 -.206E+03 -.279E+03 -.279E-02 0.716E-01 -  
.464E-01 -.538E-07 0.768E-06 -.115E-05  
-.627E-01 0.300E+02 0.294E+03 0.725E-01 -.299E+02 -.294E+03 -.948E-02 -.347E-01  
0.125E-02 -.143E-06 0.186E-06 -.635E-07  
-.206E+01 0.145E+03 -.282E+03 0.208E+01 -.145E+03 0.282E+03 -.189E-01 0.132E+00  
0.257E-01 0.619E-07 0.761E-06 0.209E-06  
-.256E+01 -.209E+02 -.285E+03 0.258E+01 0.208E+02 0.285E+03 -.291E-01 0.409E-01  
0.317E-01 -.791E-06 0.621E-06 0.133E-06  
-.554E+00 -.290E+02 0.291E+03 0.559E+00 0.290E+02 -.291E+03 -.284E-02 0.293E-01 -  
.250E-01 0.113E-06 -.105E-06 0.212E-06  
0.591E-01 0.139E+03 0.289E+03 -.593E-01 -.139E+03 -.289E+03 -.327E-03 0.109E+00 -  
.208E-01 -.297E-06 0.544E-06 -.612E-06  
-.289E+01 0.377E+02 -.286E+03 0.291E+01 -.377E+02 0.286E+03 -.150E-01 -.307E-02  
0.211E-01 -.117E-06 0.659E-06 0.160E-06  
-.512E+01 -.128E+03 -.271E+03 0.517E+01 0.128E+03 0.271E+03 -.463E-01 -.862E-01

0.382E-01 - .814E-06 0.962E-06 0.641E-06  
0.405E+00 -.137E+03 0.280E+03 -.397E+00 0.137E+03 -.280E+03 -.968E-02 -.127E+00 -  
.156E-01 0.240E-07 0.988E-07 0.151E-06  
0.195E+01 -.343E+03 0.233E+03 -.195E+01 0.344E+03 -.233E+03 0.916E-02 -.460E+00 -  
.545E-01 -.282E-06 -.726E-07 -.368E-06  
-.251E+01 -.197E+03 -.259E+03 0.252E+01 0.197E+03 0.259E+03 -.962E-02 -.197E+00  
0.371E-01 -.152E-05 0.697E-06 0.439E-06  
0.695E+01 -.447E+03 -.198E+03 -.696E+01 0.448E+03 0.198E+03 0.974E-02 -.112E+01  
0.879E-01 -.146E-05 0.561E-07 0.252E-06  
-.453E+00 -.451E+03 0.204E+03 0.454E+00 0.452E+03 -.204E+03 -.202E-02 -.108E+01 -  
.112E+00 -.333E-06 0.729E-06 0.349E-06  
0.172E+01 -.203E+03 0.269E+03 -.171E+01 0.203E+03 -.269E+03 -.479E-02 -.926E-01 -  
.319E-01 -.316E-07 0.545E-07 -.334E-06  
-.207E+01 -.338E+03 -.222E+03 0.212E+01 0.338E+03 0.222E+03 -.444E-01 -.604E+00  
0.536E-01 -.148E-05 0.479E-06 0.101E-05  
0.219E+01 -.136E+03 0.282E+03 -.219E+01 0.136E+03 -.282E+03 -.636E-02 -.126E+00 -  
.938E-02 -.161E-06 0.377E-06 -.840E-06  
0.673E+01 -.339E+03 0.238E+03 -.671E+01 0.340E+03 -.238E+03 -.127E-01 -.461E+00 -  
.459E-01 -.101E-06 -.546E-06 -.141E-05  
0.680E+01 -.193E+03 -.258E+03 -.682E+01 0.193E+03 0.258E+03 0.109E-01 -.145E+00  
0.633E-01 -.603E-06 0.392E-06 -.350E-06  
0.313E+02 -.427E+03 -.198E+03 -.314E+02 0.428E+03 0.197E+03 0.726E-01 -.969E+00

0.135E+00 0.151E-05 0.150E-05 -.387E-06  
0.546E+01 -.449E+03 0.209E+03 -.546E+01 0.450E+03 -.209E+03 0.634E-03 -.108E+01 -  
.798E-01 -.447E-06 -.601E-06 -.105E-05  
0.369E+01 -.201E+03 0.272E+03 -.369E+01 0.201E+03 -.272E+03 -.733E-03 -.975E-01 -  
.305E-01 -.152E-06 0.157E-06 -.135E-05  
0.124E+02 -.332E+03 -.223E+03 -.125E+02 0.332E+03 0.223E+03 0.120E+00 -.534E+00  
0.314E-01 -.457E-06 0.566E-06 -.477E-06  
0.219E+01 -.133E+03 0.283E+03 -.220E+01 0.133E+03 -.283E+03 0.543E-03 -.128E+00 -  
.441E-02 -.146E-06 0.574E-06 -.118E-05  
0.493E+01 -.332E+03 0.245E+03 -.490E+01 0.332E+03 -.245E+03 -.319E-01 -.476E+00 -  
.375E-01 0.186E-06 0.695E-07 -.539E-06  
0.112E+02 -.182E+03 -.258E+03 -.113E+02 0.182E+03 0.258E+03 0.462E-01 -.979E-01 -  
.104E+00 0.109E-05 0.976E-06 -.215E-06  
0.319E+02 -.399E+03 -.175E+03 -.322E+02 0.400E+03 0.174E+03 0.294E+00 -.141E+01  
0.133E+01 -.664E-06 0.258E-05 0.662E-06  
0.931E+01 -.443E+03 0.219E+03 -.931E+01 0.444E+03 -.219E+03 -.558E-02 -.109E+01 -  
.484E-01 0.400E-06 -.465E-06 -.890E-06  
0.169E+01 -.196E+03 0.273E+03 -.170E+01 0.197E+03 -.273E+03 0.551E-02 -.109E+00 -  
.511E-01 -.753E-07 0.319E-06 -.963E-06  
0.173E+02 -.310E+03 -.216E+03 -.176E+02 0.310E+03 0.216E+03 0.324E+00 -.217E+00  
0.124E+00 0.212E-05 0.242E-05 -.642E-07  
-.104E+01 -.132E+03 0.281E+03 0.103E+01 0.132E+03 -.281E+03 0.103E-01 -.127E+00

0.129E-03    -.339E-07 0.379E-06 -.553E-06  
              -.514E+01 -.332E+03 0.239E+03    0.513E+01 0.332E+03 -.239E+03    0.878E-02 -.494E+00 -  
.418E-01    -.243E-06 0.513E-06 0.442E-06  
              0.153E+01 -.169E+03 -.261E+03    -.166E+01 0.169E+03 0.261E+03    0.114E+00 0.361E+00 -  
.929E-01    0.213E-07 -.953E-07 0.268E-06  
              -.789E+01 -.301E+03 -.189E+03    0.750E+01 0.296E+03 0.185E+03    0.274E+00 0.502E+01  
0.403E+01    -.485E-05 -.345E-05 -.907E-06  
              -.627E+00 -.436E+03 0.227E+03    0.624E+00 0.437E+03 -.227E+03    0.162E-02 -.120E+01 -  
.477E-01    0.185E-06 0.535E-06 0.720E-06  
              -.303E+01 -.197E+03 0.268E+03    0.302E+01 0.197E+03 -.268E+03    0.146E-01 -.111E+00 -  
.429E-01    -.144E-06 0.209E-06 -.616E-07  
              0.335E+01 -.280E+03 -.215E+03    -.523E+01 0.280E+03 0.214E+03    0.188E+01 0.610E+00  
0.819E+00    -.242E-05 0.157E-05 0.126E-05  
              -.275E+01 -.134E+03 0.277E+03    0.275E+01 0.134E+03 -.277E+03    0.244E-02 -.123E+00 -  
.185E-01    0.565E-07 -.954E-07 0.241E-06  
              -.603E+01 -.338E+03 0.230E+03    0.602E+01 0.339E+03 -.230E+03    0.112E-01 -.494E+00 -  
.460E-01    0.137E-06 0.609E-06 0.658E-06  
              -.655E+01 -.171E+03 -.257E+03    0.662E+01 0.170E+03 0.257E+03    -.817E-01 0.495E+00  
0.177E-01    0.218E-05 0.624E-06 0.110E-05  
              -.440E+02 -.422E+03 -.184E+03    0.446E+02 0.424E+03 0.183E+03    -.564E+00 -.111E+01  
0.607E+00    0.211E-05 -.495E-05 -.393E-06  
              -.870E+01 -.441E+03 0.211E+03    0.869E+01 0.442E+03 -.211E+03    0.143E-01 -.111E+01 -

.751E-01    -.135E-06 0.123E-05 0.773E-06  
              -.294E+01 -.201E+03 0.265E+03    0.295E+01 0.201E+03 -.265E+03    -.917E-02 -.110E+00 -  
.203E-01    0.141E-06 -.173E-06 0.672E-06  
              -.145E+02 -.290E+03 -.209E+03    0.165E+02 0.289E+03 0.209E+03    -.201E+01 0.633E+00  
0.776E+00    0.454E-05 -.488E-05 -.106E-05  
              -.139E+01 -.136E+03 0.277E+03    0.140E+01 0.136E+03 -.277E+03    -.102E-01 -.125E+00 -  
.239E-01    0.259E-06 -.195E-06 0.681E-06  
              -.278E+01 -.343E+03 0.230E+03    0.276E+01 0.343E+03 -.230E+03    0.235E-01 -.473E+00 -  
.591E-01    0.271E-06 0.557E-06 0.667E-06  
              -.104E+02 -.189E+03 -.258E+03    0.104E+02 0.189E+03 0.258E+03    -.774E-01 -.141E+00 -  
.518E-01    -.307E-06 0.389E-06 0.136E-05  
              -.149E+02 -.446E+03 -.196E+03    0.150E+02 0.447E+03 0.196E+03    -.684E-01 -.113E+01  
0.986E-01    -.418E-06 0.558E-06 0.193E-05  
              -.550E+01 -.448E+03 0.204E+03    0.550E+01 0.449E+03 -.203E+03    -.486E-02 -.109E+01 -  
.125E+00    0.308E-06 0.145E-05 0.635E-06  
              -.909E+00 -.203E+03 0.267E+03    0.918E+00 0.203E+03 -.267E+03    -.909E-02 -.102E+00 -  
.316E-01    0.277E-06 -.719E-07 0.579E-06  
              -.162E+02 -.329E+03 -.218E+03    0.166E+02 0.329E+03 0.218E+03    -.359E+00 -.482E+00  
0.412E-01    0.610E-06 -.446E-06 0.199E-05  
              0.433E+00 -.257E+03 -.195E+03    -.126E+01 0.249E+03 0.190E+03    0.103E+01 0.781E+01  
0.488E+01    -.745E-05 0.115E-06 0.124E-05  
              0.533E+02 -.518E+03 -.136E+03    -.543E+02 0.522E+03 0.140E+03    0.105E+01 -.396E+01 -

.382E+01 - .464E-06 0.190E-05 0.116E-05

-.489E+02 -.585E+03 -.446E+03 0.555E+02 0.636E+03 0.480E+03 -.675E+01 -.508E+02 -

.342E+02 -.732E-05 0.653E-05 0.534E-05

-----

0.547E+01 0.276E+02 0.223E+02 -.334E-12 -.182E-11 0.148E-11 -.551E+01 -.276E+02 -

.223E+02 -.140E-04 0.288E-04 0.265E-04

POSITION

TOTAL-FORCE (eV/Angst)

-----

|          |         |         |           |           |           |
|----------|---------|---------|-----------|-----------|-----------|
| 1.24575  | 4.02870 | 5.43979 | 0.000044  | 0.001036  | -0.000408 |
| 1.21024  | 4.07581 | 8.43726 | -0.000984 | 0.002629  | -0.001135 |
| 3.70862  | 4.02890 | 5.43965 | 0.000311  | 0.001908  | -0.001092 |
| 3.67998  | 4.07733 | 8.43690 | -0.004033 | -0.000402 | -0.002880 |
| 6.17157  | 4.02854 | 5.43942 | -0.000003 | -0.000120 | -0.001750 |
| 6.14482  | 4.08292 | 8.43295 | -0.002830 | -0.003285 | -0.003177 |
| 8.63513  | 4.02801 | 5.43869 | 0.000783  | -0.000425 | -0.002001 |
| 8.60339  | 4.08732 | 8.43089 | -0.000128 | -0.001166 | -0.002198 |
| 11.09928 | 4.02784 | 5.43885 | 0.000877  | 0.001993  | -0.002705 |
| 11.06021 | 4.08619 | 8.43099 | -0.001741 | 0.000724  | -0.000620 |
| 13.56311 | 4.02807 | 5.43972 | 0.000334  | 0.001640  | -0.001616 |
| 13.52141 | 4.08047 | 8.43349 | 0.000405  | -0.002241 | 0.000316  |

|          |          |         |           |           |           |
|----------|----------|---------|-----------|-----------|-----------|
| 2.44241  | 15.48073 | 8.85224 | -0.000642 | -0.005269 | 0.002334  |
| 0.01714  | 15.44624 | 5.32469 | 0.000343  | 0.001539  | -0.001190 |
| 4.86040  | 15.47728 | 8.86623 | 0.001055  | 0.000295  | -0.000080 |
| 2.48016  | 15.44854 | 5.27562 | 0.000361  | -0.001194 | -0.000511 |
| 4.94382  | 15.44925 | 5.24869 | 0.001772  | -0.002992 | 0.000320  |
| 12.31531 | 15.48242 | 9.00211 | -0.005339 | -0.000994 | 0.009336  |
| 9.86772  | 15.44556 | 5.34176 | 0.000452  | -0.001078 | 0.000884  |
| 14.76279 | 15.48245 | 8.89951 | -0.006261 | -0.000543 | 0.005514  |
| 12.33384 | 15.44510 | 5.36128 | 0.001368  | -0.003218 | -0.001265 |
| 7.40743  | 15.44616 | 5.26463 | 0.002356  | 0.001621  | 0.001325  |
| 6.44846  | 16.34427 | 7.40648 | -0.004521 | -0.001594 | 0.000726  |
| 8.60064  | 16.47644 | 7.89249 | 0.004020  | 0.002759  | 0.004062  |
| 1.24544  | 5.11881  | 5.35500 | 0.000937  | 0.000160  | -0.002437 |
| 2.44348  | 5.83889  | 8.62292 | 0.002464  | -0.004417 | 0.001229  |
| 0.01380  | 5.79530  | 5.28573 | 0.002086  | -0.002445 | 0.000475  |
| 1.21063  | 5.16420  | 8.54151 | 0.000250  | -0.000501 | -0.001906 |
| 2.44351  | 7.27931  | 8.74832 | -0.000119 | -0.001247 | -0.000122 |
| 3.70866  | 5.11896  | 5.35390 | -0.000436 | -0.001624 | 0.000344  |
| 4.90800  | 5.84315  | 8.62123 | -0.001106 | 0.003818  | -0.000758 |
| 2.47701  | 5.79561  | 5.28397 | 0.001466  | -0.000590 | -0.002603 |
| 3.67679  | 5.16572  | 8.54000 | -0.000139 | 0.001636  | -0.000041 |
| 4.90764  | 7.28398  | 8.74777 | 0.000709  | -0.000681 | 0.001018  |

|          |         |         |           |           |           |
|----------|---------|---------|-----------|-----------|-----------|
| 6.17184  | 5.11860 | 5.35433 | 0.001476  | 0.000399  | 0.000900  |
| 7.37096  | 5.84929 | 8.62094 | -0.000704 | 0.007166  | -0.002432 |
| 4.94029  | 5.79548 | 5.28340 | 0.000619  | -0.002675 | -0.001169 |
| 6.14080  | 5.17108 | 8.53715 | -0.002473 | 0.002531  | 0.002466  |
| 7.37071  | 7.28983 | 8.75132 | -0.002082 | 0.001615  | 0.000151  |
| 8.63543  | 5.11820 | 5.35521 | 0.001242  | 0.001347  | -0.001048 |
| 9.83233  | 5.85166 | 8.62337 | 0.002922  | 0.000697  | -0.001082 |
| 7.40374  | 5.79498 | 5.28512 | 0.003460  | -0.002681 | -0.001333 |
| 8.60194  | 5.17528 | 8.53759 | -0.001883 | -0.000370 | -0.000227 |
| 9.83204  | 7.29110 | 8.75719 | -0.001547 | -0.002639 | -0.002429 |
| 11.09930 | 5.11814 | 5.35578 | -0.000871 | -0.003343 | -0.001353 |
| 12.29449 | 5.84673 | 8.62385 | -0.000044 | 0.005768  | -0.002205 |
| 9.86750  | 5.79468 | 5.28678 | -0.000740 | -0.000706 | 0.001557  |
| 11.06261 | 5.17409 | 8.53894 | 0.002662  | 0.002566  | -0.000400 |
| 12.29428 | 7.28729 | 8.75533 | -0.004592 | 0.001113  | -0.001530 |
| 13.56278 | 5.11829 | 5.35605 | 0.002660  | 0.000529  | -0.001966 |
| 14.75895 | 5.83988 | 8.62434 | -0.000261 | -0.002596 | -0.002171 |
| 12.33118 | 5.79480 | 5.28692 | -0.004502 | -0.001444 | 0.002599  |
| 13.52535 | 5.16844 | 8.54022 | -0.003485 | 0.003789  | -0.001439 |
| 14.75917 | 7.28012 | 8.75179 | 0.000951  | 0.002614  | -0.000683 |
| 0.01434  | 7.23830 | 5.19017 | 0.000076  | -0.000200 | 0.000083  |
| 1.24689  | 9.38061 | 5.13160 | 0.000539  | -0.001858 | 0.000009  |

|         |          |         |           |           |           |
|---------|----------|---------|-----------|-----------|-----------|
| 1.21085 | 7.98059  | 8.79588 | -0.000936 | -0.000516 | 0.001518  |
| 2.44214 | 10.12243 | 8.87141 | -0.000960 | 0.003357  | -0.005001 |
| 0.01532 | 10.08686 | 5.14049 | -0.002031 | -0.000134 | -0.002391 |
| 1.24606 | 7.94244  | 5.15775 | 0.002020  | -0.002586 | 0.000834  |
| 1.21082 | 9.41592  | 8.85782 | -0.000725 | 0.004344  | 0.000175  |
| 2.44072 | 11.55513 | 8.88414 | -0.005688 | -0.002854 | 0.001639  |
| 2.47747 | 7.23842  | 5.18585 | 0.002801  | 0.002884  | 0.001319  |
| 3.70997 | 9.38055  | 5.12566 | -0.001096 | -0.003002 | 0.000052  |
| 3.67534 | 7.98360  | 8.79349 | -0.000596 | 0.001136  | 0.000981  |
| 4.90487 | 10.12925 | 8.87518 | 0.000252  | -0.000219 | -0.000045 |
| 2.47867 | 10.08713 | 5.12695 | -0.002248 | 0.001504  | 0.000770  |
| 3.70939 | 7.94242  | 5.15441 | 0.000830  | -0.004006 | -0.001692 |
| 3.67589 | 9.41970  | 8.85445 | -0.001452 | 0.001919  | -0.000145 |
| 4.90263 | 11.56506 | 8.89086 | 0.000221  | 0.001614  | 0.000787  |
| 4.94085 | 7.23830  | 5.18552 | -0.004712 | 0.002253  | 0.000840  |
| 6.17318 | 9.38002  | 5.13173 | 0.002011  | 0.002106  | 0.001839  |
| 6.13864 | 7.99044  | 8.79647 | 0.002426  | -0.000222 | -0.001703 |
| 7.36780 | 10.13760 | 8.89473 | -0.001881 | 0.003523  | 0.000859  |
| 4.94196 | 10.08682 | 5.12700 | 0.004158  | 0.001485  | -0.001149 |
| 6.17284 | 7.94199  | 5.15766 | -0.000041 | 0.000563  | 0.003037  |
| 6.13939 | 9.42660  | 8.86164 | 0.000892  | -0.000765 | -0.002149 |
| 7.36410 | 11.57721 | 8.92935 | 0.000056  | -0.004432 | 0.003831  |

|          |          |         |           |           |           |
|----------|----------|---------|-----------|-----------|-----------|
| 7.40426  | 7.23794  | 5.19012 | 0.002122  | 0.001767  | 0.001085  |
| 8.63700  | 9.37970  | 5.14543 | -0.000557 | 0.002941  | 0.000971  |
| 8.60086  | 7.99568  | 8.80617 | 0.001052  | -0.000349 | -0.001067 |
| 9.83068  | 10.14286 | 8.92842 | -0.001530 | 0.002698  | -0.000611 |
| 7.40553  | 10.08627 | 5.14064 | 0.001218  | -0.003547 | 0.003156  |
| 8.63637  | 7.94166  | 5.16555 | 0.002633  | 0.001808  | -0.001401 |
| 8.60077  | 9.43254  | 8.88532 | -0.006035 | 0.002228  | -0.001315 |
| 9.82927  | 11.58244 | 9.00096 | 0.000462  | 0.002813  | 0.000962  |
| 9.86805  | 7.23787  | 5.19489 | -0.000360 | 0.000111  | -0.000207 |
| 11.10106 | 9.37979  | 5.15156 | -0.003847 | -0.001022 | 0.000661  |
| 11.06331 | 7.99411  | 8.80818 | -0.000299 | -0.001632 | 0.000111  |
| 12.29815 | 10.12943 | 8.90340 | -0.002140 | -0.001250 | 0.001163  |
| 9.86930  | 10.08593 | 5.15631 | -0.005427 | -0.001443 | 0.001416  |
| 11.10021 | 7.94175  | 5.16862 | -0.000589 | -0.003071 | 0.001396  |
| 11.06206 | 9.43062  | 8.88839 | 0.004667  | 0.001742  | 0.002129  |
| 12.30255 | 11.56557 | 8.94694 | 0.004574  | 0.001262  | -0.000940 |
| 12.33169 | 7.23799  | 5.19447 | -0.001046 | 0.000250  | -0.001742 |
| 13.56437 | 9.38021  | 5.14435 | 0.000738  | 0.001647  | -0.000567 |
| 13.52754 | 7.98555  | 8.80171 | -0.000842 | -0.002613 | -0.003062 |
| 14.76233 | 10.12320 | 8.88285 | -0.005224 | 0.001010  | -0.001513 |
| 12.33257 | 10.08637 | 5.15511 | 0.002644  | 0.000558  | -0.001532 |
| 13.56350 | 7.94214  | 5.16485 | -0.000072 | -0.000884 | -0.000365 |

|          |          |         |           |           |           |
|----------|----------|---------|-----------|-----------|-----------|
| 13.52731 | 9.42040  | 8.86925 | -0.000046 | 0.003477  | -0.000607 |
| 14.76430 | 11.55727 | 8.90646 | -0.001960 | -0.001082 | 0.002078  |
| 0.01611  | 11.52516 | 5.16621 | -0.001082 | -0.002568 | 0.000398  |
| 1.24770  | 13.67535 | 5.22209 | 0.001812  | -0.002380 | -0.002478 |
| 1.21217  | 12.26335 | 8.89409 | 0.000040  | -0.000199 | 0.001138  |
| 2.43998  | 14.38728 | 8.86748 | -0.002118 | 0.001034  | 0.000851  |
| 0.01699  | 14.35408 | 5.27295 | -0.000416 | -0.000571 | -0.001966 |
| 1.24794  | 12.22963 | 5.17275 | 0.001074  | 0.000851  | -0.001353 |
| 1.21434  | 13.70818 | 8.88771 | 0.001773  | 0.001992  | 0.003888  |
| 2.47958  | 11.52580 | 5.14547 | -0.001607 | -0.000192 | -0.001469 |
| 3.71218  | 13.67636 | 5.19535 | 0.004665  | 0.000553  | 0.001053  |
| 3.66932  | 12.26248 | 8.88184 | -0.002757 | 0.000127  | -0.000551 |
| 4.89370  | 14.38589 | 8.86075 | 0.004573  | -0.000877 | -0.003031 |
| 2.48000  | 14.35596 | 5.23149 | 0.001287  | -0.001095 | 0.001686  |
| 3.71150  | 12.23022 | 5.15602 | 0.000927  | -0.004559 | 0.001018  |
| 3.66212  | 13.70366 | 8.87117 | -0.006118 | 0.003968  | -0.000790 |
| 4.94290  | 11.52542 | 5.14351 | -0.000095 | -0.001760 | -0.001594 |
| 6.17627  | 13.67505 | 5.20032 | 0.000822  | 0.000549  | 0.000079  |
| 6.13145  | 12.27911 | 8.90591 | 0.005329  | 0.005761  | 0.004731  |
| 7.36614  | 14.42967 | 8.88203 | -0.000894 | -0.003535 | -0.001633 |
| 4.94347  | 14.35627 | 5.21375 | 0.000074  | -0.001924 | 0.001016  |
| 6.17493  | 12.22917 | 5.16623 | -0.001403 | -0.001028 | 0.001542  |

|          |          |         |           |           |           |
|----------|----------|---------|-----------|-----------|-----------|
| 6.11879  | 13.72336 | 8.87765 | 0.005549  | 0.003078  | 0.001986  |
| 7.40625  | 11.52413 | 5.16368 | 0.000885  | -0.003358 | 0.000365  |
| 8.63876  | 13.67323 | 5.24377 | 0.001869  | 0.002000  | -0.001252 |
| 8.58939  | 12.29067 | 9.00208 | -0.008958 | 0.000297  | -0.002288 |
| 9.83855  | 14.39048 | 9.30305 | -0.113514 | -0.030467 | -0.012385 |
| 7.40672  | 14.35386 | 5.23530 | -0.001179 | -0.000315 | -0.000653 |
| 8.63820  | 12.22778 | 5.19800 | 0.000325  | -0.001203 | 0.001023  |
| 8.55571  | 13.73596 | 9.04598 | 0.006366  | -0.043743 | -0.012066 |
| 9.86985  | 11.52338 | 5.18893 | 0.001745  | -0.001977 | -0.000108 |
| 11.10099 | 13.67352 | 5.27669 | 0.003198  | -0.000883 | -0.001034 |
| 11.07378 | 12.27333 | 9.00891 | -0.012550 | 0.005295  | -0.002331 |
| 12.30694 | 14.38896 | 9.00333 | -0.006341 | 0.003702  | 0.003586  |
| 9.86934  | 14.35300 | 5.29564 | 0.002992  | 0.000068  | 0.000039  |
| 11.10161 | 12.22804 | 5.21650 | -0.001106 | -0.002704 | 0.001085  |
| 11.11464 | 13.70636 | 9.07877 | 0.011165  | 0.037591  | 0.015457  |
| 12.33326 | 11.52411 | 5.18815 | -0.000934 | 0.000269  | 0.000540  |
| 13.56430 | 13.67399 | 5.25995 | 0.001543  | -0.000090 | 0.000077  |
| 13.53626 | 12.26601 | 8.93587 | -0.002461 | 0.004529  | 0.002207  |
| 14.76266 | 14.38906 | 8.90426 | -0.003692 | 0.001927  | 0.003778  |
| 12.33397 | 14.35288 | 5.30710 | 0.002775  | -0.001782 | -0.001759 |
| 13.56505 | 12.22870 | 5.20105 | 0.000130  | 0.000102  | -0.001123 |
| 13.54921 | 13.70690 | 8.94399 | -0.001553 | -0.006004 | -0.002796 |

|          |          |          |           |           |           |
|----------|----------|----------|-----------|-----------|-----------|
| 9.89626  | 15.53185 | 9.99472  | 0.218535  | 0.135959  | 0.091603  |
| 7.28864  | 16.40884 | 8.69813  | -0.001930 | -0.001374 | -0.004380 |
| 10.02526 | 16.50365 | 10.64498 | -0.079717 | -0.107794 | -0.070196 |

-----

|              |  |  |           |          |           |
|--------------|--|--|-----------|----------|-----------|
| total drift: |  |  | -0.044843 | 0.023791 | -0.023949 |
|--------------|--|--|-----------|----------|-----------|

-----

FREE ENERGIE OF THE ION-ELECTRON SYSTEM (eV)

-----

free energy TOTEN = -1209.38763079 eV

energy without entropy= -1209.38763079 energy(sigma->0) = -1209.38763079

d Force =-0.1011019E-03[-0.656E-02, 0.635E-02] d Energy =-0.6371352E-04-0.374E-04

d Force =-0.7125961E-01[ 0.377E-01,-0.180E+00] d Ewald =-0.7098629E-01-0.273E-03

-----

POTLOK: cpu time 0.1823: real time 0.1829

-----

stress matrix after NEB project (eV)

-17.74921 -0.15356 0.10575

-0.15356 -15.35083 0.40647

0.10575 0.40647 -19.08177

FORCES: max atom, RMS 0.273191 0.025759

FORCE total and by dimension 0.312307 0.218535

Stress total and by dimension 30.252210 19.081768

Finite differences progress:

Degree of freedom: 1/ 6

Displacement: 2/ 2

Total: 2/ 12

LATTYP: Found a simple orthorhombic cell.

ALAT = 14.7806000000

B/A-ratio = 1.2466138046

C/A-ratio = 1.4433717170

Lattice vectors:

A1 = (-14.7806000000, 0.0000000000, 0.0000000000)

A2 = ( 0.0000000000, 0.0000000000, -18.4257000000)

A3 = ( 0.0000000000, -21.3339000000, 0.0000000000)

Analysis of symmetry for initial positions (statically):

---

Subroutine PRICEL returns:

Original cell was already a primitive cell.

Routine SETGRP: Setting up the symmetry group for a  
simple orthorhombic supercell.

Subroutine GETGRP returns: Found 1 space group operations

(whereof 1 operations were pure point group operations)

out of a pool of 8 trial point group operations.

The static configuration has the point symmetry  $C_1$ .

Analysis of symmetry for dynamics (positions and initial velocities):

---

Subroutine PRICEL returns:

Original cell was already a primitive cell.

Routine SETGRP: Setting up the symmetry group for a  
simple orthorhombic supercell.

Subroutine GETGRP returns: Found 1 space group operations  
(whereof 1 operations were pure point group operations)  
out of a pool of 8 trial point group operations.

The dynamic configuration has the point symmetry  $C_1$ .

Analysis of constrained symmetry for selective dynamics:

---

Subroutine PRICEL returns:

Original cell was already a primitive cell.

Routine SETGRP: Setting up the symmetry group for a  
simple orthorhombic supercell.

Subroutine GETGRP returns: Found 1 space group operations  
(whereof 1 operations were pure point group operations)  
out of a pool of 8 trial point group operations.

The constrained configuration has the point symmetry  $C_1$ .

Analysis of structural, dynamic, and magnetic symmetry:

---

Subroutine PRICEL returns:

Original cell was already a primitive cell.

Routine SETGRP: Setting up the symmetry group for a  
simple orthorhombic supercell.

Subroutine GETGRP returns: Found 1 space group operations  
(whereof 1 operations were pure point group operations)  
out of a pool of 8 trial point group operations.

The magnetic configuration has the point symmetry  $C_1$ .

Subroutine INISYM returns: Found 1 space group operations  
(whereof 1 operations are pure point group operations),  
and found 1 'primitive' translations

KPOINTS: KPT-Resolved Value to Generate K-Mesh: 0

Automatic generation of k-mesh.

Space group operators:

| irotn    | det(A)   | alpha    | n_x      | n_y      | n_z      | tau_x    |
|----------|----------|----------|----------|----------|----------|----------|
| tau_y    | tau_z    |          |          |          |          |          |
| 1        | 1.000000 | 0.000000 | 1.000000 | 0.000000 | 0.000000 | 0.000000 |
| 0.000000 | 0.000000 |          |          |          |          |          |

Subroutine IBZKPT returns following result:

=====

Found 1 irreducible k-points:

Following reciprocal coordinates:

| Coordinates |          |          | Weight   |
|-------------|----------|----------|----------|
| 0.000000    | 0.000000 | 0.000000 | 1.000000 |

Following cartesian coordinates:

| Coordinates |          |          | Weight   |
|-------------|----------|----------|----------|
| 0.000000    | 0.000000 | 0.000000 | 1.000000 |

WAVPRE: cpu time 0.1202: real time 0.1449

FEWALD: cpu time 0.0026: real time 0.0027

ORTHCH: cpu time 1.0121: real time 1.0155

LOOP+: cpu time 167.1332: real time 168.0651

----- Iteration 4( 1) -----

POTLOK: cpu time 0.1700: real time 0.1814

SETDIJ: cpu time 0.0100: real time 0.0101

EDDIAG: cpu time 1.9294: real time 1.9350

RMM-DIIS: cpu time 7.2835: real time 7.3196

ORTHCH: cpu time 0.3517: real time 0.3528

DOS: cpu time 0.0004: real time 0.0004

CHARGE: cpu time 0.5054: real time 0.5280

MIXING: cpu time 0.0041: real time 0.0041

-----

LOOP: cpu time 10.2545: real time 10.3313

eigenvalue-minimisations : 1952

total energy-change (2. order) : 0.7938770E-02 (-0.9857791E-01)

number of electron 518.9999721 magnetization 0.9999998

augmentation part 11.7409647 magnetization 0.0543255

Broyden mixing:

rms(total) = 0.35379E-01      rms(broyden)= 0.35220E-01

rms(prec ) = 0.37109E-01

weight for this iteration      100.00

Free energy of the ion-electron system (eV)

-----

alpha Z      PSCENC =      233.50077011

Ewald energy      TEWEN =      91325.54742994

-Hartree energ DENC =      -107331.40412186

-exchange      EXHF =      0.00000000

-V(xc)+E(xc)      XCENC =      1743.80660088

PAW double counting =      52175.16913140      -52238.08667671

entropy T\*S      EENTRO =      -0.00000000

eigenvalues      EBANDS =      -5815.62505209

atomic energy      EATOM =      18704.32991668

Solvation      Ediel\_sol =      0.00000000

-----

free energy      TOTEN =      -1202.76200165 eV

energy without entropy =      -1202.76200165      energy(sigma->0) =      -1202.76200165

-----

----- Iteration 4( 2) -----

|           |          |          |           |         |
|-----------|----------|----------|-----------|---------|
| POTLOK:   | cpu time | 0.1671:  | real time | 0.1873  |
| SETDIJ:   | cpu time | 0.0101:  | real time | 0.0102  |
| EDDIAG:   | cpu time | 1.9183:  | real time | 1.9247  |
| RMM-DIIS: | cpu time | 7.1104:  | real time | 7.1457  |
| ORTHCH:   | cpu time | 0.3523:  | real time | 0.3536  |
| DOS:      | cpu time | 0.0004:  | real time | 0.0004  |
| CHARGE:   | cpu time | 0.5250:  | real time | 0.5268  |
| MIXING:   | cpu time | 0.0046:  | real time | 0.0046  |
| -----     |          |          |           |         |
| LOOP:     | cpu time | 10.0883: | real time | 10.1533 |

total energy-change (2. order) : 0.1013455E-02 (-0.9421488E-03)

number of electron      518.9999721 magnetization      0.9999998

augmentation part      11.7402902 magnetization      0.0543220

Broyden mixing:

rms(total) = 0.21257E-01      rms(broyden)= 0.21235E-01

rms(prec ) = 0.22081E-01

weight for this iteration      100.00

eigenvalues of (default mixing \* dielectric matrix)

average eigenvalue GAMMA=      1.5527

1.5527

Free energy of the ion-electron system (eV)

-----

alpha Z      PSCENC =      233.50077011

Ewald energy      TEWEN =      91325.54742994

-Hartree energ DENC =      -107332.03161384

-exchange      EXHF =      0.00000000

-V(xc)+E(xc)      XCENC =      1743.81370709

PAW double counting =      52178.83975866      -52241.76108857

entropy T\*S      EENTRO =      -0.00000000

eigenvalues EBANDS = -5814.99986827

atomic energy EATOM = 18704.32991668

Solvation Ediel\_sol = 0.00000000

-----  
free energy TOTEN = -1202.76098819 eV

energy without entropy = -1202.76098819 energy(sigma->0) = -1202.76098819

----- Iteration 4( 3) -----

POTLOK: cpu time 0.1710: real time 0.1827

SETDIJ: cpu time 0.0102: real time 0.0102

EDDIAG: cpu time 1.9221: real time 1.9283

RMM-DIIS: cpu time 7.3015: real time 7.3400

ORTHCH: cpu time 0.3523: real time 0.3532

DOS: cpu time 0.0004: real time 0.0004

CHARGE: cpu time 0.5244: real time 0.5258

MIXING: cpu time 0.0051: real time 0.0051

-----

LOOP: cpu time 10.2870: real time 10.3457

eigenvalue-minimisations : 1956

total energy-change (2. order) : 0.5675717E-03 (-0.1043139E-03)

number of electron 518.9999721 magnetization 0.9999998

augmentation part 11.7410103 magnetization 0.0543085

Broyden mixing:

rms(total) = 0.93161E-02 rms(broyden)= 0.93138E-02

rms(prec ) = 0.96874E-02

weight for this iteration 100.00

eigenvalues of (default mixing \* dielectric matrix)

average eigenvalue GAMMA= 1.5807

0.8304 2.3310

Free energy of the ion-electron system (eV)

-----

alpha Z        PSCENC =        233.50077011  
Ewald energy    TEWEN  =        91325.54742994  
  
-Hartree energ DENC    =    -107332.57738147  
  
-exchange        EXHF    =        0.00000000  
  
-V(xc)+E(xc)    XCENC  =        1743.81435307  
  
PAW double counting    =    52182.06060545    -52244.98454088  
  
entropy T\*S     EENTRO =        -0.00000000  
  
eigenvalues     EBANDS =        -5814.45157353  
  
atomic energy    EATOM  =        18704.32991668  
  
Solvation    Ediel\_sol  =        0.00000000

-----

free energy     TOTEN  =        -1202.76042062 eV

energy without entropy =    -1202.76042062    energy(sigma->0) =    -1202.76042062

-----

|           |          |          |           |         |
|-----------|----------|----------|-----------|---------|
| POTLOK:   | cpu time | 0.1670:  | real time | 0.1864  |
| SETDIJ:   | cpu time | 0.0101:  | real time | 0.0101  |
| EDDIAG:   | cpu time | 1.9318:  | real time | 1.9382  |
| RMM-DIIS: | cpu time | 7.1617:  | real time | 7.1846  |
| ORTHCH:   | cpu time | 0.3517:  | real time | 0.3527  |
| DOS:      | cpu time | 0.0004:  | real time | 0.0004  |
| CHARGE:   | cpu time | 0.5261:  | real time | 0.5278  |
| MIXING:   | cpu time | 0.0054:  | real time | 0.0054  |
| -----     |          |          |           |         |
| LOOP:     | cpu time | 10.1542: | real time | 10.2055 |

eigenvalue-minimisations : 1927

total energy-change (2. order) : 0.9431443E-04 (-0.2702808E-04)

number of electron      518.9999721 magnetization      0.9999998

augmentation part      11.7407435 magnetization      0.0543011

Broyden mixing:

rms(total) = 0.25886E-02      rms(broyden)= 0.25873E-02

rms(prec ) = 0.28853E-02

weight for this iteration      100.00

eigenvalues of (default mixing \* dielectric matrix)

average eigenvalue GAMMA= 1.4753

2.2677 0.8673 1.2908

Free energy of the ion-electron system (eV)

-----

alpha Z PSCENC = 233.50077011

Ewald energy TEWEN = 91325.54742994

-Hartree energy DENC = -107332.98036334

-exchange EXHF = 0.00000000

-V(xc)+E(xc) XCENC = 1743.81897260

PAW double counting = 52183.86235388 -52246.78904882

entropy T\*S EENTRO = -0.00000000

eigenvalues EBANDS = -5814.05035736

atomic energy EATOM = 18704.32991668

Solvation Ediel\_sol = 0.00000000

-----

free energy TOTEN = -1202.76032631 eV

energy without entropy = -1202.76032631 energy(sigma->0) = -1202.76032631

-----

----- Iteration 4( 5) -----

|           |          |         |           |        |
|-----------|----------|---------|-----------|--------|
| POTLOK:   | cpu time | 0.1689: | real time | 0.1870 |
| SETDIJ:   | cpu time | 0.0101: | real time | 0.0102 |
| EDDIAG:   | cpu time | 1.9189: | real time | 1.9255 |
| RMM-DIIS: | cpu time | 7.3064: | real time | 7.3387 |
| ORTHCH:   | cpu time | 0.3510: | real time | 0.3523 |
| DOS:      | cpu time | 0.0004: | real time | 0.0004 |
| CHARGE:   | cpu time | 0.5238: | real time | 0.5256 |
| MIXING:   | cpu time | 0.0055: | real time | 0.0055 |

-----

|       |          |          |           |         |
|-------|----------|----------|-----------|---------|
| LOOP: | cpu time | 10.2850: | real time | 10.3450 |
|-------|----------|----------|-----------|---------|

eigenvalue-minimisations : 1942

total energy-change (2. order) : 0.7268485E-05 (-0.2508181E-05)

number of electron      518.9999721 magnetization      0.9999998  
augmentation part      11.7407829 magnetization      0.0543027

Broyden mixing:

rms(total) = 0.12630E-02      rms(broyden)= 0.12620E-02

rms( prec ) = 0.14793E-02

weight for this iteration      100.00

eigenvalues of (default mixing \* dielectric matrix)

average eigenvalue GAMMA=      1.4321

2.2773    1.8391    0.8061    0.8061

Free energy of the ion-electron system (eV)

-----

alpha Z      PSCENC =      233.50077011

Ewald energy    TEWEN =      91325.54742994

-Hartree energ DENC =    -107333.09020002

-exchange      EXHF =      0.00000000

-V(xc)+E(xc)    XCENC =      1743.81884363

PAW double counting =      52183.75838935    -52246.68503252

entropy T\*S      EENTRO =      -0.00000000

eigenvalues      EBANDS =      -5813.94043621

atomic energy EATOM = 18704.32991668

Solvation Ediel\_sol = 0.00000000

-----  
free energy TOTEN = -1202.76031904 eV

energy without entropy = -1202.76031904 energy(sigma->0) = -1202.76031904

----- Iteration 4( 6) -----

POTLOK: cpu time 0.1674: real time 0.1698

SETDIJ: cpu time 0.0100: real time 0.0100

EDDIAG: cpu time 1.9266: real time 1.9333

RMM-DIIS: cpu time 7.0498: real time 7.0822

ORTHCH: cpu time 0.3520: real time 0.3533

DOS: cpu time 0.0004: real time 0.0003

CHARGE: cpu time 0.5237: real time 0.5255

MIXING: cpu time 0.0059: real time 0.0059

-----

LOOP: cpu time 10.0358: real time 10.0803

eigenvalue-minimisations : 1901

total energy-change (2. order) :-0.1025132E-04 (-0.6387607E-06)

number of electron 518.9999721 magnetization 0.9999998

augmentation part 11.7407626 magnetization 0.0543031

Broyden mixing:

rms(total) = 0.65067E-03 rms(broyden)= 0.65036E-03

rms(prec ) = 0.86656E-03

weight for this iteration 100.00

eigenvalues of (default mixing \* dielectric matrix)

average eigenvalue GAMMA= 1.3857

2.4271 1.9196 0.9171 0.9171 0.7476

Free energy of the ion-electron system (eV)

-----

alpha Z PSCENC = 233.50077011

Ewald energy TEWEN = 91325.54742994

-Hartree energy DENC = -107333.19602290

-exchange EXHF = 0.00000000

-V(xc)+E(xc) XCENC = 1743.81938030

PAW double counting = 52183.59078586 -52246.51762029

entropy T\*S EENTRO = -0.00000000

eigenvalues EBANDS = -5813.83496900

atomic energy EATOM = 18704.32991668

Solvation Ediel\_sol = 0.00000000

-----

free energy TOTEN = -1202.76032929 eV

energy without entropy = -1202.76032929 energy(sigma->0) = -1202.76032929

-----

----- Iteration 4( 7) -----

|           |          |         |           |        |
|-----------|----------|---------|-----------|--------|
| POTLOK:   | cpu time | 0.1679: | real time | 0.1824 |
| SETDIJ:   | cpu time | 0.0102: | real time | 0.0103 |
| EDDIAG:   | cpu time | 1.9214: | real time | 1.9273 |
| RMM-DIIS: | cpu time | 6.6770: | real time | 6.7118 |
| ORTHCH:   | cpu time | 0.3515: | real time | 0.3524 |
| DOS:      | cpu time | 0.0003: | real time | 0.0003 |
| CHARGE:   | cpu time | 0.5243: | real time | 0.5260 |
| MIXING:   | cpu time | 0.0060: | real time | 0.0060 |
| -----     |          |         |           |        |
| LOOP:     | cpu time | 9.6586: | real time | 9.7165 |

eigenvalue-minimisations : 1812

total energy-change (2. order) :-0.1620913E-04 (-0.2229325E-06)

number of electron 518.9999721 magnetization 0.9999998

augmentation part 11.7407733 magnetization 0.0543017

Broyden mixing:

rms(total) = 0.33385E-03 rms(broyden)= 0.33367E-03

rms(prec ) = 0.53408E-03

weight for this iteration 100.00

eigenvalues of (default mixing \* dielectric matrix)

average eigenvalue GAMMA= 1.4502

2.7493 2.0898 1.4984 0.8740 0.8740 0.6160

Free energy of the ion-electron system (eV)

-----

alpha Z PSCENC = 233.50077011

Ewald energy TEWEN = 91325.54742994

-Hartree energ DENC = -107333.29010950

-exchange EXHF = 0.00000000

-V(xc)+E(xc) XCENC = 1743.81981190

PAW double counting = 52183.43130258 -52246.35826771

entropy T\*S EENTRO = -0.00000000

eigenvalues EBANDS = -5813.74119950

atomic energy EATOM = 18704.32991668

Solvation Ediel\_sol = 0.00000000

-----

free energy TOTEN = -1202.76034550 eV

energy without entropy = -1202.76034550 energy(sigma->0) = -1202.76034550

-----

----- Iteration 4( 8) -----

|           |          |         |           |        |
|-----------|----------|---------|-----------|--------|
| POTLOK:   | cpu time | 0.1666: | real time | 0.1854 |
| SETDIJ:   | cpu time | 0.0101: | real time | 0.0102 |
| EDDIAG:   | cpu time | 1.9209: | real time | 1.9270 |
| RMM-DIIS: | cpu time | 6.3493: | real time | 6.3698 |
| ORTHCH:   | cpu time | 0.3509: | real time | 0.3521 |
| DOS:      | cpu time | 0.0004: | real time | 0.0004 |
| CHARGE:   | cpu time | 0.5246: | real time | 0.5262 |
| MIXING:   | cpu time | 0.0065: | real time | 0.0065 |

-----

|       |          |         |           |        |
|-------|----------|---------|-----------|--------|
| LOOP: | cpu time | 9.3292: | real time | 9.3776 |
|-------|----------|---------|-----------|--------|

eigenvalue-minimisations : 1731

total energy-change (2. order) :-0.1900066E-04 (-0.1236404E-06)

number of electron 518.9999721 magnetization 0.9999998

augmentation part            11.7407910 magnetization            0.0543010

Broyden mixing:

rms(total) = 0.22768E-03      rms(broyden)= 0.22757E-03

rms(prec ) = 0.37579E-03

weight for this iteration      100.00

eigenvalues of (default mixing \* dielectric matrix)

average eigenvalue GAMMA=    1.4018

2.7812  2.3235  1.3717  0.9766  0.9766  0.7711  0.6120

Free energy of the ion-electron system (eV)

-----

alpha Z            PSCENC =            233.50077011

Ewald energy      TEWEN =            91325.54742994

-Hartree energ DENC =    -107333.37605285

-exchange        EXHF =            0.00000000

-V(xc)+E(xc)      XCENC =            1743.82015537

PAW double counting =    52183.27871392    -52246.20574592

entropy T\*S       EENTRO =            -0.00000000

eigenvalues       EBANDS =            -5813.65555176

atomic energy     EATOM =            18704.32991668

Solvation Ediel\_sol = 0.00000000

-----

free energy TOTEN = -1202.76036450 eV

energy without entropy = -1202.76036450 energy(sigma->0) = -1202.76036450

-----

----- Iteration 4( 9) -----

|           |          |         |           |        |
|-----------|----------|---------|-----------|--------|
| POTLOK:   | cpu time | 0.1652: | real time | 0.1656 |
| SETDIJ:   | cpu time | 0.0101: | real time | 0.0102 |
| EDDIAG:   | cpu time | 1.9214: | real time | 1.9274 |
| RMM-DIIS: | cpu time | 5.9933: | real time | 6.0134 |
| ORTHCH:   | cpu time | 0.3515: | real time | 0.3525 |
| DOS:      | cpu time | 0.0004: | real time | 0.0004 |
| CHARGE:   | cpu time | 0.5239: | real time | 0.5254 |

MIXING: cpu time 0.0067: real time 0.0067

-----

LOOP: cpu time 8.9725: real time 9.0017

eigenvalue-minimisations : 1610

total energy-change (2. order) :-0.1888505E-04 (-0.5562337E-07)

number of electron 518.9999721 magnetization 0.9999998

augmentation part 11.7407912 magnetization 0.0543010

Broyden mixing:

rms(total) = 0.12933E-03 rms(broyden)= 0.12921E-03

rms( prec ) = 0.24920E-03

weight for this iteration 100.00

eigenvalues of (default mixing \* dielectric matrix)

average eigenvalue GAMMA= 1.5125

3.1863 2.5965 1.6383 1.4857 0.8875 0.8875 0.8076 0.6111

Free energy of the ion-electron system (eV)

-----

alpha Z PSCENC = 233.50077011

Ewald energy TEWEN = 91325.54742994

-Hartree energ DENC = -107333.43575016

-exchange EXHF = 0.00000000

-V(xc)+E(xc) XCENC = 1743.82042689

PAW double counting = 52183.20542577 -52246.13248970

entropy T\*S EENTRO = -0.00000000

eigenvalues EBANDS = -5813.59611292

atomic energy EATOM = 18704.32991668

Solvation Ediel\_sol = 0.00000000

-----  
free energy TOTEN = -1202.76038339 eV

energy without entropy = -1202.76038339 energy(sigma->0) = -1202.76038339

----- Iteration 4( 10) -----

|           |          |         |           |        |
|-----------|----------|---------|-----------|--------|
| POTLOK:   | cpu time | 0.1653: | real time | 0.1726 |
| SETDIJ:   | cpu time | 0.0101: | real time | 0.0101 |
| EDDIAG:   | cpu time | 1.9177: | real time | 1.9240 |
| RMM-DIIS: | cpu time | 6.1666: | real time | 6.1877 |
| ORTHCH:   | cpu time | 0.3516: | real time | 0.3527 |
| DOS:      | cpu time | 0.0004: | real time | 0.0003 |
| CHARGE:   | cpu time | 0.5263: | real time | 0.5281 |
| MIXING:   | cpu time | 0.0069: | real time | 0.0069 |
| -----     |          |         |           |        |
| LOOP:     | cpu time | 9.1449: | real time | 9.1824 |

eigenvalue-minimisations : 1688

total energy-change (2. order) :-0.2908654E-04 (-0.1255691E-06)

number of electron 518.9999721 magnetization 0.9999998

augmentation part 11.7407924 magnetization 0.0543007

Broyden mixing:

rms(total) = 0.11439E-03 rms(broyden)= 0.11427E-03

rms(prec ) = 0.15685E-03

weight for this iteration 100.00

eigenvalues of (default mixing \* dielectric matrix)

average eigenvalue GAMMA= 1.5673

4.0552 2.5966 2.0872 1.1511 1.0406 1.0406 0.8158 0.7035 0.6155

Free energy of the ion-electron system (eV)

-----

alpha Z PSCENC = 233.50077011

Ewald energy TEWEN = 91325.54742994

-Hartree energy DENC = -107333.53177087

-exchange EXHF = 0.00000000

-V(xc)+E(xc) XCENC = 1743.82087566

PAW double counting = 52183.13824468 -52246.06537445

entropy T\*S EENTRO = -0.00000000

eigenvalues EBANDS = -5813.50050423

atomic energy EATOM = 18704.32991668

Solvation Ediel\_sol = 0.00000000

-----

free energy TOTEN = -1202.76041247 eV

energy without entropy = -1202.76041247 energy(sigma->0) = -1202.76041247

-----

----- Iteration 4( 11) -----

|           |          |         |           |        |
|-----------|----------|---------|-----------|--------|
| POTLOK:   | cpu time | 0.1667: | real time | 0.1846 |
| SETDIJ:   | cpu time | 0.0102: | real time | 0.0103 |
| EDDIAG:   | cpu time | 1.9178: | real time | 1.9242 |
| RMM-DIIS: | cpu time | 5.5531: | real time | 5.5692 |
| ORTHCH:   | cpu time | 0.3539: | real time | 0.3547 |
| DOS:      | cpu time | 0.0004: | real time | 0.0004 |
| CHARGE:   | cpu time | 0.5238: | real time | 0.5255 |
| MIXING:   | cpu time | 0.0074: | real time | 0.0074 |

-----

|       |          |         |           |        |
|-------|----------|---------|-----------|--------|
| LOOP: | cpu time | 8.5334: | real time | 8.5763 |
|-------|----------|---------|-----------|--------|

eigenvalue-minimisations : 1510

total energy-change (2. order) :-0.9993615E-05 (-0.2593714E-07)

|                    |             |               |           |
|--------------------|-------------|---------------|-----------|
| number of electron | 518.9999721 | magnetization | 0.9999998 |
|--------------------|-------------|---------------|-----------|

|                   |            |               |           |
|-------------------|------------|---------------|-----------|
| augmentation part | 11.7407959 | magnetization | 0.0543005 |
|-------------------|------------|---------------|-----------|

Broyden mixing:

rms(total) = 0.57094E-04      rms(broyden)= 0.57047E-04

rms(prec ) = 0.91153E-04

weight for this iteration      100.00

eigenvalues of (default mixing \* dielectric matrix)

average eigenvalue GAMMA=    1.6435

4.7448   2.5693   2.1703   1.4449   1.4449   0.9748   0.9748   0.8168   0.6768   0.6180

Free energy of the ion-electron system (eV)

-----

alpha Z      PSCENC =      233.50077011

Ewald energy    TEWEN =      91325.54742994

-Hartree energy DENC =    -107333.55947933

-exchange      EXHF =      0.00000000

-V(xc)+E(xc)    XCENC =      1743.82097219

PAW double counting =    52183.13945335    -52246.06659376

entropy T\*S    EENTRO =      -0.00000000

eigenvalues    EBANDS =      -5813.47289165

atomic energy    EATOM =      18704.32991668

Solvation    Ediel\_sol =      0.00000000

-----  
free energy    TOTEN    =    -1202.76042247 eV

energy without entropy =    -1202.76042247    energy(sigma->0) =    -1202.76042247

----- Iteration    4( 12) -----

|           |          |         |           |        |
|-----------|----------|---------|-----------|--------|
| POTLOK:   | cpu time | 0.1686: | real time | 0.1834 |
| SETDIJ:   | cpu time | 0.0099: | real time | 0.0100 |
| EDDIAG:   | cpu time | 1.9246: | real time | 1.9311 |
| RMM-DIIS: | cpu time | 5.5294: | real time | 5.5606 |
| ORTHCH:   | cpu time | 0.3515: | real time | 0.3526 |
| DOS:      | cpu time | 0.0004: | real time | 0.0004 |
| CHARGE:   | cpu time | 0.5240: | real time | 0.5256 |
| MIXING:   | cpu time | 0.0078: | real time | 0.0078 |

-----  
LOOP:  cpu time    8.5161: real time    8.5715

eigenvalue-minimisations : 1507

total energy-change (2. order) :-0.1259484E-04  (-0.2244830E-07)

number of electron    518.9999721 magnetization        0.9999998

augmentation part     11.7408009 magnetization        0.0543004

Broyden mixing:

rms(total) = 0.44971E-04    rms(broyden)= 0.44927E-04

rms(prec ) = 0.62623E-04

weight for this iteration    100.00

eigenvalues of (default mixing \* dielectric matrix)

average eigenvalue GAMMA=    1.7769

6.1781  2.7325  2.4748  2.0067  1.0608  1.0608  1.0902  0.8309  0.8309  0.6604

0.6201

Free energy of the ion-electron system (eV)

-----  
alpha Z           PSCENC =        233.50077011

Ewald energy    TEWEN  =        91325.54742994

-Hartree energ DENC = -107333.58047267

-exchange EXHF = 0.00000000

-V(xc)+E(xc) XCENC = 1743.82098575

PAW double counting = 52183.16358045 -52246.09071019

entropy T\*S EENTRO = -0.00000000

eigenvalues EBANDS = -5813.45193514

atomic energy EATOM = 18704.32991668

Solvation Ediel\_sol = 0.00000000

-----  
free energy TOTEN = -1202.76043506 eV

energy without entropy = -1202.76043506 energy(sigma->0) = -1202.76043506

|           |          |         |           |        |
|-----------|----------|---------|-----------|--------|
| POTLOK:   | cpu time | 0.1661: | real time | 0.1695 |
| SETDIJ:   | cpu time | 0.0100: | real time | 0.0101 |
| EDDIAG:   | cpu time | 1.9187: | real time | 1.9252 |
| RMM-DIIS: | cpu time | 5.0822: | real time | 5.1081 |
| ORTHCH:   | cpu time | 0.3512: | real time | 0.3523 |
| DOS:      | cpu time | 0.0004: | real time | 0.0004 |
| CHARGE:   | cpu time | 0.5245: | real time | 0.5260 |
| MIXING:   | cpu time | 0.0079: | real time | 0.0080 |
| -----     |          |         |           |        |
| LOOP:     | cpu time | 8.0610: | real time | 8.0996 |

eigenvalue-minimisations : 1403

total energy-change (2. order) :-0.6715527E-05 (-0.8363735E-08)

number of electron 518.9999721 magnetization 0.9999998

augmentation part 11.7408004 magnetization 0.0543004

Broyden mixing:

rms(total) = 0.20320E-04 rms(broyden)= 0.20308E-04

rms(prec ) = 0.33005E-04

weight for this iteration 100.00

eigenvalues of (default mixing \* dielectric matrix)

average eigenvalue GAMMA= 1.7381

6.4459 2.7925 2.5286 2.0022 1.0969 1.0969 1.0254 0.8985 0.8985 0.7954  
0.6549 0.6210

Free energy of the ion-electron system (eV)

-----

alpha Z PSCENC = 233.50077011

Ewald energy TEWEN = 91325.54742994

-Hartree energy DENC = -107333.59083388

-exchange EXHF = 0.00000000

-V(xc)+E(xc) XCENC = 1743.82100891

PAW double counting = 52183.17516026 -52246.10229038

entropy T\*S EENTRO = -0.00000000

eigenvalues EBANDS = -5813.44160343

atomic energy EATOM = 18704.32991668

Solvation Ediel\_sol = 0.00000000

-----

free energy TOTEN = -1202.76044178 eV

energy without entropy = -1202.76044178 energy(sigma->0) = -1202.76044178

-----

----- Iteration 4( 14) -----

|           |          |         |           |        |
|-----------|----------|---------|-----------|--------|
| POTLOK:   | cpu time | 0.1647: | real time | 0.1650 |
| SETDIJ:   | cpu time | 0.0217: | real time | 0.0219 |
| EDDIAG:   | cpu time | 1.9237: | real time | 1.9301 |
| RMM-DIIS: | cpu time | 4.8904: | real time | 4.9282 |
| ORTHCH:   | cpu time | 0.3509: | real time | 0.3520 |
| DOS:      | cpu time | 0.0004: | real time | 0.0004 |
| CHARGE:   | cpu time | 0.5274: | real time | 0.5290 |
| MIXING:   | cpu time | 0.0082: | real time | 0.0082 |

-----

|       |          |         |           |        |
|-------|----------|---------|-----------|--------|
| LOOP: | cpu time | 7.8874: | real time | 7.9349 |
|-------|----------|---------|-----------|--------|

eigenvalue-minimisations : 1365

total energy-change (2. order) :-0.4569294E-05 (-0.3786505E-08)

number of electron 518.9999721 magnetization 0.9999998

augmentation part            11.7407995 magnetization            0.0543004

Broyden mixing:

rms(total) = 0.14748E-04      rms(broyden)= 0.14740E-04

rms(prec ) = 0.22264E-04

weight for this iteration      100.00

eigenvalues of (default mixing \* dielectric matrix)

average eigenvalue GAMMA=    1.8728

7.0355  3.4707  2.7263  2.2019  2.0008  1.1062  1.1062  1.0205  0.8675  0.8675

0.6872  0.6278  0.6278

Free energy of the ion-electron system (eV)

-----

alpha Z            PSCENC =            233.50077011

Ewald energy      TEWEN =            91325.54742994

-Hartree energ DENC =    -107333.59349426

-exchange        EXHF =            0.00000000

-V(xc)+E(xc)      XCENC =            1743.82101435

PAW double counting =    52183.17267333    -52246.09980913

entropy T\*S       EENTRO =            -0.00000000

eigenvalues       EBANDS =            -5813.43894737

atomic energy EATOM = 18704.32991668

Solvation Ediel\_sol = 0.00000000

-----  
free energy TOTEN = -1202.76044635 eV

energy without entropy = -1202.76044635 energy(sigma->0) = -1202.76044635

----- Iteration 4( 15) -----

|           |          |         |           |        |
|-----------|----------|---------|-----------|--------|
| POTLOK:   | cpu time | 0.1664: | real time | 0.1865 |
| SETDIJ:   | cpu time | 0.0100: | real time | 0.0100 |
| EDDIAG:   | cpu time | 1.9183: | real time | 1.9246 |
| RMM-DIIS: | cpu time | 4.8483: | real time | 4.8719 |
| ORTHCH:   | cpu time | 0.3514: | real time | 0.3526 |
| DOS:      | cpu time | 0.0004: | real time | 0.0004 |

CHARGE: cpu time 0.5241: real time 0.5258

MIXING: cpu time 0.0088: real time 0.0088

-----

LOOP: cpu time 7.8277: real time 7.8806

eigenvalue-minimisations : 1342

total energy-change (2. order) :-0.3483539E-05 (-0.3187058E-08)

number of electron 518.9999721 magnetization 0.9999998

augmentation part 11.7407995 magnetization 0.0543005

Broyden mixing:

rms(total) = 0.10857E-04 rms(broyden)= 0.10854E-04

rms(prec ) = 0.13993E-04

weight for this iteration 100.00

eigenvalues of (default mixing \* dielectric matrix)

average eigenvalue GAMMA= 1.8989

7.5268 4.1895 2.6410 2.3733 1.9662 1.1085 1.1085 0.9737 0.9737 0.9348

0.8647 0.6757 0.6239 0.6239

Free energy of the ion-electron system (eV)

-----

alpha Z        PSCENC =        233.50077011  
Ewald energy    TEWEN =        91325.54742994  
  
-Hartree energ DENC =    -107333.59528041  
  
-exchange       EXHF =        0.00000000  
  
-V(xc)+E(xc)   XCENC =        1743.82100771  
  
PAW double counting =    52183.16830003    -52246.09543851  
  
entropy T\*S     EENTRO =        -0.00000000  
  
eigenvalues     EBANDS =        -5813.43715540  
  
atomic energy   EATOM =        18704.32991668  
  
Solvation    Ediel\_sol =        0.00000000

-----

free energy     TOTEN =        -1202.76044983 eV

energy without entropy =    -1202.76044983    energy(sigma->0) =    -1202.76044983

-----

|           |          |         |           |        |
|-----------|----------|---------|-----------|--------|
| POTLOK:   | cpu time | 0.1665: | real time | 0.1796 |
| SETDIJ:   | cpu time | 0.0100: | real time | 0.0101 |
| EDDIAG:   | cpu time | 1.9212: | real time | 1.9277 |
| RMM-DIIS: | cpu time | 4.4339: | real time | 4.4611 |
| ORTHCH:   | cpu time | 0.3516: | real time | 0.3527 |
| DOS:      | cpu time | 0.0004: | real time | 0.0004 |
| CHARGE:   | cpu time | 0.5246: | real time | 0.5265 |
| MIXING:   | cpu time | 0.0096: | real time | 0.0097 |
| -----     |          |         |           |        |
| LOOP:     | cpu time | 7.4179: | real time | 7.4677 |

eigenvalue-minimisations : 1123

total energy-change (2. order) :-0.6995033E-06 (-0.7275087E-09)

number of electron 518.9999721 magnetization 0.9999998

augmentation part 11.7407998 magnetization 0.0543005

Broyden mixing:

rms(total) = 0.50698E-05 rms(broyden)= 0.50672E-05

rms(prec ) = 0.78509E-05

weight for this iteration 100.00

eigenvalues of (default mixing \* dielectric matrix)

average eigenvalue GAMMA= 1.9031

7.7426 4.5093 2.5436 2.5436 1.9299 1.3732 1.1874 1.1874 0.9632 0.9632

0.8414 0.8414 0.6742 0.6227 0.6227

Free energy of the ion-electron system (eV)

-----  
alpha Z PSCENC = 233.50077011

Ewald energy TEWEN = 91325.54742994

-Hartree energ DENC = -107333.59537553

-exchange EXHF = 0.00000000

-V(xc)+E(xc) XCENC = 1743.82099749

PAW double counting = 52183.16710924 -52246.09424547

entropy T\*S EENTRO = -0.00000000

eigenvalues EBANDS = -5813.43705299

atomic energy EATOM = 18704.32991668

Solvation Ediel\_sol = 0.00000000

-----  
free energy TOTEN = -1202.76045053 eV

energy without entropy = -1202.76045053 energy(sigma->0) = -1202.76045053

-----

----- Iteration 4( 17) -----

|           |          |         |           |        |
|-----------|----------|---------|-----------|--------|
| POTLOK:   | cpu time | 0.1670: | real time | 0.1688 |
| SETDIJ:   | cpu time | 0.0099: | real time | 0.0099 |
| EDDIAG:   | cpu time | 1.9175: | real time | 1.9238 |
| RMM-DIIS: | cpu time | 4.5022: | real time | 4.5280 |
| ORTHCH:   | cpu time | 0.3523: | real time | 0.3534 |
| DOS:      | cpu time | 0.0004: | real time | 0.0004 |
| CHARGE:   | cpu time | 0.5243: | real time | 0.5259 |
| MIXING:   | cpu time | 0.0099: | real time | 0.0099 |
| -----     |          |         |           |        |
| LOOP:     | cpu time | 7.4834: | real time | 7.5201 |

eigenvalue-minimisations : 1167

total energy-change (2. order) :-0.4972680E-06 (-0.4231362E-09)

number of electron      518.9999721 magnetization      0.9999998

augmentation part      11.7408001 magnetization      0.0543004

Broyden mixing:

rms(total) = 0.33072E-05      rms(broyden)= 0.33040E-05

rms(prec ) = 0.49441E-05

weight for this iteration      100.00

eigenvalues of (default mixing \* dielectric matrix)

average eigenvalue GAMMA=      1.9678

8.0359   5.0508   2.8370   2.6691   1.9991   1.9991   1.1792   1.1792   1.0671   1.0671

0.8754   0.8754   0.7324   0.6726   0.6224   0.6224

Free energy of the ion-electron system (eV)

-----

alpha Z      PSCENC =      233.50077011

Ewald energy      TEWEN =      91325.54742994

-Hartree energ      DENC =      -107333.59526579

-exchange      EXHF =      0.00000000

-V(xc)+E(xc)      XCENC =      1743.82098806

PAW double counting =      52183.16592073      -52246.09305530

entropy T\*S    EENTRO =        -0.00000000

eigenvalues    EBANDS =       -5813.43715546

atomic energy  EATOM  =       18704.32991668

Solvation    Ediel\_sol  =        0.00000000

-----

free energy    TOTEN  =       -1202.76045103 eV

energy without entropy =    -1202.76045103    energy(sigma->0) =    -1202.76045103

-----

----- Iteration        4( 18) -----

POTLOK:    cpu time    0.1658: real time    0.1815

SETDIJ:    cpu time    0.0100: real time    0.0100

EDDIAG:    cpu time    1.9190: real time    1.9251

RMM-DIIS:    cpu time    4.2278: real time    4.2537

ORTHCH: cpu time 0.3526: real time 0.3536

DOS: cpu time 0.0004: real time 0.0004

CHARGE: cpu time 0.5241: real time 0.5258

MIXING: cpu time 0.0098: real time 0.0099

-----

LOOP: cpu time 7.2096: real time 7.2599

eigenvalue-minimisations : 1036

total energy-change (2. order) :-0.2024608E-06 (-0.2362848E-09)

number of electron 518.9999721 magnetization 0.9999998

augmentation part 11.7408002 magnetization 0.0543004

Broyden mixing:

rms(total) = 0.23556E-05 rms(broyden)= 0.23551E-05

rms(prec ) = 0.31734E-05

weight for this iteration 100.00

eigenvalues of (default mixing \* dielectric matrix)

average eigenvalue GAMMA= 1.9637

8.2303 5.3749 3.1352 2.5726 2.2659 1.9164 1.2117 1.2117 1.1003 1.1003

0.9399 0.8616 0.8616 0.6915 0.6654 0.6220 0.6220

Free energy of the ion-electron system (eV)

-----

alpha Z        PSCENC =        233.50077011

Ewald energy    TEWEN =        91325.54742994

-Hartree energy DENC =    -107333.59523949

-exchange       EXHF =            0.00000000

-V(xc)+E(xc)    XCENC =        1743.82098439

PAW double counting =    52183.16578470    -52246.09291955

entropy T\*S     EENTRO =        -0.00000000

eigenvalues     EBANDS =       -5813.43717803

atomic energy   EATOM =        18704.32991668

Solvation    Ediel\_sol =        0.00000000

-----

free energy     TOTEN =       -1202.76045123 eV

energy without entropy =    -1202.76045123    energy(sigma->0) =    -1202.76045123

-----

----- Iteration 4( 19) -----

POTLOK: cpu time 0.1669: real time 0.1819  
SETDIJ: cpu time 0.0100: real time 0.0100  
EDDIAG: cpu time 1.9190: real time 1.9257  
RMM-DIIS: cpu time 4.0459: real time 4.0727  
ORTHCH: cpu time 0.3508: real time 0.3538  
DOS: cpu time 0.0004: real time 0.0004

-----

LOOP: cpu time 6.4929: real time 6.5444

eigenvalue-minimisations : 914

total energy-change (2. order) :-0.5442416E-07 (-0.6418865E-10)

number of electron 518.9999721 magnetization 0.9999998

augmentation part 11.7408002 magnetization 0.0543004

Free energy of the ion-electron system (eV)

-----

alpha Z PSCENC = 233.50077011

Ewald energy TEWEN = 91325.54742994

-Hartree energ DENC = -107333.59524903

-exchange EXHF = 0.00000000

-V(xc)+E(xc) XCENC = 1743.82098395

PAW double counting = 52183.16652543 -52246.09366077

entropy T\*S EENTRO = -0.00000000

eigenvalues EBANDS = -5813.43716760

atomic energy EATOM = 18704.32991668

Solvation Ediel\_sol = 0.00000000

-----  
free energy TOTEN = -1202.76045128 eV

energy without entropy = -1202.76045128 energy(sigma->0) = -1202.76045128

-----  
average (electrostatic) potential at core

the test charge radii are 0.5201 0.6991 1.0621 0.7215

(the norm of the test charge is 1.0000)

|              |              |              |              |              |
|--------------|--------------|--------------|--------------|--------------|
| 1 -40.7490   | 2 -40.7468   | 3 -40.7482   | 4 -40.7468   | 5 -40.7490   |
| 6 -40.7511   | 7 -40.7488   | 8 -40.7566   | 9 -40.7484   | 10 -40.7561  |
| 11 -40.7498  | 12 -40.7517  | 13 -40.6433  | 14 -40.6913  | 15 -40.7639  |
| 16 -40.6933  | 17 -40.6876  | 18 -40.8607  | 19 -40.6751  | 20 -40.6606  |
| 21 -40.6843  | 22 -40.6579  | 23 -40.0910  | 24 -40.1354  | 25 -57.4547  |
| 26 -57.6654  | 27 -57.6527  | 28 -57.4643  | 29 -57.6583  | 30 -57.4547  |
| 31 -57.6653  | 32 -57.6523  | 33 -57.4623  | 34 -57.6633  | 35 -57.4555  |
| 36 -57.6672  | 37 -57.6523  | 38 -57.4646  | 39 -57.6693  | 40 -57.4546  |
| 41 -57.6713  | 42 -57.6525  | 43 -57.4696  | 44 -57.6839  | 45 -57.4546  |
| 46 -57.6702  | 47 -57.6533  | 48 -57.4698  | 49 -57.6749  | 50 -57.4557  |
| 51 -57.6668  | 52 -57.6530  | 53 -57.4673  | 54 -57.6611  | 55 -57.6323  |
| 56 -57.6581  | 57 -57.6820  | 58 -57.6773  | 59 -57.6618  | 60 -57.6648  |
| 61 -57.6843  | 62 -57.6685  | 63 -57.6325  | 64 -57.6576  | 65 -57.6840  |
| 66 -57.6890  | 67 -57.6601  | 68 -57.6646  | 69 -57.6881  | 70 -57.6950  |
| 71 -57.6320  | 72 -57.6590  | 73 -57.6918  | 74 -57.7166  | 75 -57.6610  |
| 76 -57.6653  | 77 -57.7006  | 78 -57.7456  | 79 -57.6323  | 80 -57.6616  |
| 81 -57.7057  | 82 -57.7471  | 83 -57.6643  | 84 -57.6668  | 85 -57.7324  |
| 86 -57.8363  | 87 -57.6347  | 88 -57.6623  | 89 -57.7075  | 90 -57.7118  |
| 91 -57.6689  | 92 -57.6670  | 93 -57.7370  | 94 -57.7537  | 95 -57.6330  |
| 96 -57.6604  | 97 -57.6911  | 98 -57.6849  | 99 -57.6662  | 100 -57.6658 |
| 101 -57.7024 | 102 -57.6798 | 103 -57.6554 | 104 -57.6257 | 105 -57.6390 |
| 106 -57.2813 | 107 -57.3826 | 108 -57.6263 | 109 -57.5899 | 110 -57.6543 |

|              |              |              |              |              |
|--------------|--------------|--------------|--------------|--------------|
| 111 -57.6257 | 112 -57.6357 | 113 -57.3000 | 114 -57.3882 | 115 -57.6256 |
| 116 -57.5920 | 117 -57.6536 | 118 -57.6177 | 119 -57.6920 | 120 -57.6729 |
| 121 -57.3821 | 122 -57.6245 | 123 -57.7023 | 124 -57.6547 | 125 -57.6204 |
| 126 -57.8284 | 127 -58.3345 | 128 -57.3557 | 129 -57.6298 | 130 -58.1358 |
| 131 -57.6625 | 132 -57.6296 | 133 -57.7954 | 134 -57.4063 | 135 -57.3667 |
| 136 -57.6337 | 137 -58.0689 | 138 -57.6590 | 139 -57.6252 | 140 -57.6650 |
| 141 -57.2898 | 142 -57.3729 | 143 -57.6290 | 144 -57.6405 | 145 -60.9166 |
| 146 -57.3187 | 147 -81.4108 |              |              |              |

E-fermi : -2.3362      XC(G=0): -2.7343      alpha+bet : -2.2521

spin component 1

k-point 1 :      0.0000      0.0000      0.0000

| band No. | band energies | occupation |
|----------|---------------|------------|
| 1        | -27.2538      | 1.00000    |
| 2        | -21.5626      | 1.00000    |
| 3        | -21.4667      | 1.00000    |
| 4        | -21.0915      | 1.00000    |

|    |          |         |
|----|----------|---------|
| 5  | -21.0633 | 1.00000 |
| 6  | -21.0084 | 1.00000 |
| 7  | -20.9740 | 1.00000 |
| 8  | -20.9719 | 1.00000 |
| 9  | -20.8860 | 1.00000 |
| 10 | -20.5480 | 1.00000 |
| 11 | -20.4979 | 1.00000 |
| 12 | -20.4064 | 1.00000 |
| 13 | -20.3933 | 1.00000 |
| 14 | -20.1165 | 1.00000 |
| 15 | -19.9704 | 1.00000 |
| 16 | -19.6906 | 1.00000 |
| 17 | -19.6219 | 1.00000 |
| 18 | -19.5943 | 1.00000 |
| 19 | -19.5786 | 1.00000 |
| 20 | -19.5240 | 1.00000 |
| 21 | -19.5221 | 1.00000 |
| 22 | -19.4935 | 1.00000 |
| 23 | -19.4763 | 1.00000 |
| 24 | -19.1008 | 1.00000 |
| 25 | -19.0697 | 1.00000 |
| 26 | -18.9725 | 1.00000 |

|    |          |         |
|----|----------|---------|
| 27 | -18.9602 | 1.00000 |
| 28 | -18.8923 | 1.00000 |
| 29 | -18.7283 | 1.00000 |
| 30 | -18.4926 | 1.00000 |
| 31 | -18.3536 | 1.00000 |
| 32 | -18.2702 | 1.00000 |
| 33 | -18.2474 | 1.00000 |
| 34 | -18.1777 | 1.00000 |
| 35 | -18.1755 | 1.00000 |
| 36 | -18.0748 | 1.00000 |
| 37 | -18.0713 | 1.00000 |
| 38 | -17.5472 | 1.00000 |
| 39 | -17.3078 | 1.00000 |
| 40 | -17.2819 | 1.00000 |
| 41 | -17.2775 | 1.00000 |
| 42 | -17.2047 | 1.00000 |
| 43 | -17.1989 | 1.00000 |
| 44 | -17.1680 | 1.00000 |
| 45 | -17.0170 | 1.00000 |
| 46 | -16.9451 | 1.00000 |
| 47 | -16.9276 | 1.00000 |
| 48 | -16.8883 | 1.00000 |

|    |          |         |
|----|----------|---------|
| 49 | -16.8866 | 1.00000 |
| 50 | -16.8454 | 1.00000 |
| 51 | -16.8370 | 1.00000 |
| 52 | -16.8153 | 1.00000 |
| 53 | -16.8137 | 1.00000 |
| 54 | -16.7248 | 1.00000 |
| 55 | -16.7215 | 1.00000 |
| 56 | -16.1601 | 1.00000 |
| 57 | -15.7248 | 1.00000 |
| 58 | -15.6871 | 1.00000 |
| 59 | -15.6552 | 1.00000 |
| 60 | -15.6313 | 1.00000 |
| 61 | -15.6118 | 1.00000 |
| 62 | -15.5490 | 1.00000 |
| 63 | -15.5453 | 1.00000 |
| 64 | -15.1683 | 1.00000 |
| 65 | -14.8045 | 1.00000 |
| 66 | -14.6018 | 1.00000 |
| 67 | -14.5737 | 1.00000 |
| 68 | -14.5304 | 1.00000 |
| 69 | -14.4936 | 1.00000 |
| 70 | -14.4641 | 1.00000 |

|    |          |         |
|----|----------|---------|
| 71 | -14.4366 | 1.00000 |
| 72 | -14.3287 | 1.00000 |
| 73 | -14.3007 | 1.00000 |
| 74 | -14.2750 | 1.00000 |
| 75 | -14.2671 | 1.00000 |
| 76 | -14.1781 | 1.00000 |
| 77 | -14.1742 | 1.00000 |
| 78 | -13.8870 | 1.00000 |
| 79 | -13.7531 | 1.00000 |
| 80 | -13.5880 | 1.00000 |
| 81 | -13.5437 | 1.00000 |
| 82 | -13.5247 | 1.00000 |
| 83 | -13.4924 | 1.00000 |
| 84 | -13.4397 | 1.00000 |
| 85 | -13.3597 | 1.00000 |
| 86 | -13.3409 | 1.00000 |
| 87 | -13.1839 | 1.00000 |
| 88 | -12.7813 | 1.00000 |
| 89 | -12.7542 | 1.00000 |
| 90 | -12.7225 | 1.00000 |
| 91 | -12.6915 | 1.00000 |
| 92 | -12.6814 | 1.00000 |

|     |          |         |
|-----|----------|---------|
| 93  | -12.6191 | 1.00000 |
| 94  | -12.4568 | 1.00000 |
| 95  | -12.4421 | 1.00000 |
| 96  | -12.3770 | 1.00000 |
| 97  | -12.3189 | 1.00000 |
| 98  | -12.2086 | 1.00000 |
| 99  | -12.1990 | 1.00000 |
| 100 | -12.1602 | 1.00000 |
| 101 | -11.9562 | 1.00000 |
| 102 | -11.6801 | 1.00000 |
| 103 | -11.6318 | 1.00000 |
| 104 | -11.6066 | 1.00000 |
| 105 | -11.5927 | 1.00000 |
| 106 | -11.1357 | 1.00000 |
| 107 | -11.0906 | 1.00000 |
| 108 | -10.8953 | 1.00000 |
| 109 | -10.8837 | 1.00000 |
| 110 | -10.8292 | 1.00000 |
| 111 | -10.7062 | 1.00000 |
| 112 | -10.6813 | 1.00000 |
| 113 | -10.6602 | 1.00000 |
| 114 | -10.6417 | 1.00000 |

|     |          |         |
|-----|----------|---------|
| 115 | -10.5852 | 1.00000 |
| 116 | -10.5768 | 1.00000 |
| 117 | -10.5664 | 1.00000 |
| 118 | -10.5627 | 1.00000 |
| 119 | -10.5218 | 1.00000 |
| 120 | -10.5209 | 1.00000 |
| 121 | -10.5062 | 1.00000 |
| 122 | -10.4984 | 1.00000 |
| 123 | -10.3745 | 1.00000 |
| 124 | -10.2983 | 1.00000 |
| 125 | -10.2563 | 1.00000 |
| 126 | -10.1846 | 1.00000 |
| 127 | -10.1835 | 1.00000 |
| 128 | -10.1662 | 1.00000 |
| 129 | -10.0846 | 1.00000 |
| 130 | -9.8911  | 1.00000 |
| 131 | -9.8658  | 1.00000 |
| 132 | -9.7985  | 1.00000 |
| 133 | -9.7819  | 1.00000 |
| 134 | -9.7693  | 1.00000 |
| 135 | -9.6998  | 1.00000 |
| 136 | -9.4534  | 1.00000 |

|     |         |         |
|-----|---------|---------|
| 137 | -9.4229 | 1.00000 |
| 138 | -9.3912 | 1.00000 |
| 139 | -9.3842 | 1.00000 |
| 140 | -9.3780 | 1.00000 |
| 141 | -9.3653 | 1.00000 |
| 142 | -9.3104 | 1.00000 |
| 143 | -9.3040 | 1.00000 |
| 144 | -9.2973 | 1.00000 |
| 145 | -9.2847 | 1.00000 |
| 146 | -9.2679 | 1.00000 |
| 147 | -9.0886 | 1.00000 |
| 148 | -9.0048 | 1.00000 |
| 149 | -8.9965 | 1.00000 |
| 150 | -8.9567 | 1.00000 |
| 151 | -8.9526 | 1.00000 |
| 152 | -8.7891 | 1.00000 |
| 153 | -8.7413 | 1.00000 |
| 154 | -8.7296 | 1.00000 |
| 155 | -8.7134 | 1.00000 |
| 156 | -8.7048 | 1.00000 |
| 157 | -8.6824 | 1.00000 |
| 158 | -8.6752 | 1.00000 |

|     |         |         |
|-----|---------|---------|
| 159 | -8.6634 | 1.00000 |
| 160 | -8.6499 | 1.00000 |
| 161 | -8.5909 | 1.00000 |
| 162 | -8.5783 | 1.00000 |
| 163 | -8.5719 | 1.00000 |
| 164 | -8.5636 | 1.00000 |
| 165 | -8.4825 | 1.00000 |
| 166 | -8.4523 | 1.00000 |
| 167 | -8.4314 | 1.00000 |
| 168 | -8.3404 | 1.00000 |
| 169 | -8.2929 | 1.00000 |
| 170 | -8.2710 | 1.00000 |
| 171 | -8.2594 | 1.00000 |
| 172 | -8.2286 | 1.00000 |
| 173 | -8.2277 | 1.00000 |
| 174 | -8.1472 | 1.00000 |
| 175 | -8.1407 | 1.00000 |
| 176 | -8.0737 | 1.00000 |
| 177 | -8.0399 | 1.00000 |
| 178 | -8.0221 | 1.00000 |
| 179 | -8.0172 | 1.00000 |
| 180 | -7.9686 | 1.00000 |

|     |         |         |
|-----|---------|---------|
| 181 | -7.9599 | 1.00000 |
| 182 | -7.9200 | 1.00000 |
| 183 | -7.8958 | 1.00000 |
| 184 | -7.8807 | 1.00000 |
| 185 | -7.8675 | 1.00000 |
| 186 | -7.7964 | 1.00000 |
| 187 | -7.7928 | 1.00000 |
| 188 | -7.7438 | 1.00000 |
| 189 | -7.7061 | 1.00000 |
| 190 | -7.6620 | 1.00000 |
| 191 | -7.5945 | 1.00000 |
| 192 | -7.5798 | 1.00000 |
| 193 | -7.5715 | 1.00000 |
| 194 | -7.5420 | 1.00000 |
| 195 | -7.4760 | 1.00000 |
| 196 | -7.4754 | 1.00000 |
| 197 | -7.4237 | 1.00000 |
| 198 | -7.3191 | 1.00000 |
| 199 | -7.2446 | 1.00000 |
| 200 | -7.1641 | 1.00000 |
| 201 | -7.0629 | 1.00000 |
| 202 | -7.0377 | 1.00000 |

|     |         |         |
|-----|---------|---------|
| 203 | -7.0230 | 1.00000 |
| 204 | -7.0084 | 1.00000 |
| 205 | -6.9915 | 1.00000 |
| 206 | -6.9846 | 1.00000 |
| 207 | -6.9706 | 1.00000 |
| 208 | -6.8629 | 1.00000 |
| 209 | -6.8161 | 1.00000 |
| 210 | -6.7971 | 1.00000 |
| 211 | -6.7887 | 1.00000 |
| 212 | -6.7274 | 1.00000 |
| 213 | -6.6844 | 1.00000 |
| 214 | -6.4650 | 1.00000 |
| 215 | -6.4203 | 1.00000 |
| 216 | -6.3908 | 1.00000 |
| 217 | -6.3864 | 1.00000 |
| 218 | -6.3688 | 1.00000 |
| 219 | -6.3670 | 1.00000 |
| 220 | -6.3121 | 1.00000 |
| 221 | -6.3023 | 1.00000 |
| 222 | -6.2323 | 1.00000 |
| 223 | -6.2252 | 1.00000 |
| 224 | -6.2246 | 1.00000 |

|     |         |         |
|-----|---------|---------|
| 225 | -6.0725 | 1.00000 |
| 226 | -6.0324 | 1.00000 |
| 227 | -5.7878 | 1.00000 |
| 228 | -5.7469 | 1.00000 |
| 229 | -5.6879 | 1.00000 |
| 230 | -5.6365 | 1.00000 |
| 231 | -5.6327 | 1.00000 |
| 232 | -5.5543 | 1.00000 |
| 233 | -5.5258 | 1.00000 |
| 234 | -5.4623 | 1.00000 |
| 235 | -5.4338 | 1.00000 |
| 236 | -5.1635 | 1.00000 |
| 237 | -5.0536 | 1.00000 |
| 238 | -5.0450 | 1.00000 |
| 239 | -5.0129 | 1.00000 |
| 240 | -4.9832 | 1.00000 |
| 241 | -4.9052 | 1.00000 |
| 242 | -4.8485 | 1.00000 |
| 243 | -4.8165 | 1.00000 |
| 244 | -4.7839 | 1.00000 |
| 245 | -4.6788 | 1.00000 |
| 246 | -4.5675 | 1.00000 |

|     |         |         |
|-----|---------|---------|
| 247 | -4.5661 | 1.00000 |
| 248 | -4.4991 | 1.00000 |
| 249 | -4.4407 | 1.00000 |
| 250 | -4.3782 | 1.00000 |
| 251 | -4.2882 | 1.00000 |
| 252 | -4.2591 | 1.00000 |
| 253 | -4.2076 | 1.00000 |
| 254 | -3.5425 | 1.00000 |
| 255 | -3.3494 | 1.00000 |
| 256 | -3.1909 | 1.00000 |
| 257 | -2.9350 | 1.00000 |
| 258 | -2.8431 | 1.00000 |
| 259 | -2.8182 | 1.00000 |
| 260 | -2.5990 | 1.00000 |
| 261 | -1.9044 | 0.00000 |
| 262 | -1.7615 | 0.00000 |
| 263 | -1.7136 | 0.00000 |
| 264 | -1.3376 | 0.00000 |
| 265 | -1.2891 | 0.00000 |
| 266 | -1.1781 | 0.00000 |
| 267 | -0.7359 | 0.00000 |
| 268 | -0.5796 | 0.00000 |

|     |         |         |
|-----|---------|---------|
| 269 | -0.4966 | 0.00000 |
| 270 | -0.3028 | 0.00000 |
| 271 | -0.3006 | 0.00000 |
| 272 | -0.2850 | 0.00000 |
| 273 | -0.1782 | 0.00000 |
| 274 | -0.0528 | 0.00000 |
| 275 | -0.0448 | 0.00000 |
| 276 | -0.0052 | 0.00000 |
| 277 | 0.0400  | 0.00000 |
| 278 | 0.0895  | 0.00000 |
| 279 | 0.1779  | 0.00000 |
| 280 | 0.2257  | 0.00000 |
| 281 | 0.2530  | 0.00000 |
| 282 | 0.4253  | 0.00000 |
| 283 | 0.4527  | 0.00000 |
| 284 | 0.4863  | 0.00000 |
| 285 | 0.5949  | 0.00000 |
| 286 | 0.6741  | 0.00000 |
| 287 | 0.8190  | 0.00000 |
| 288 | 0.8685  | 0.00000 |
| 289 | 1.0494  | 0.00000 |
| 290 | 1.0890  | 0.00000 |

|     |        |         |
|-----|--------|---------|
| 291 | 1.1220 | 0.00000 |
| 292 | 1.1639 | 0.00000 |
| 293 | 1.2242 | 0.00000 |
| 294 | 1.2451 | 0.00000 |
| 295 | 1.2897 | 0.00000 |
| 296 | 1.3148 | 0.00000 |
| 297 | 1.3489 | 0.00000 |
| 298 | 1.4127 | 0.00000 |
| 299 | 1.4648 | 0.00000 |
| 300 | 1.4834 | 0.00000 |
| 301 | 1.5565 | 0.00000 |
| 302 | 1.5871 | 0.00000 |
| 303 | 1.6258 | 0.00000 |
| 304 | 1.6787 | 0.00000 |
| 305 | 1.7526 | 0.00000 |
| 306 | 1.7656 | 0.00000 |
| 307 | 1.8693 | 0.00000 |
| 308 | 1.8892 | 0.00000 |
| 309 | 1.9070 | 0.00000 |
| 310 | 1.9142 | 0.00000 |
| 311 | 2.1244 | 0.00000 |
| 312 | 2.1852 | 0.00000 |

|     |        |         |
|-----|--------|---------|
| 313 | 2.2103 | 0.00000 |
| 314 | 2.2358 | 0.00000 |
| 315 | 2.2761 | 0.00000 |
| 316 | 2.2930 | 0.00000 |
| 317 | 2.3321 | 0.00000 |
| 318 | 2.3562 | 0.00000 |
| 319 | 2.3749 | 0.00000 |
| 320 | 2.4004 | 0.00000 |
| 321 | 2.4180 | 0.00000 |
| 322 | 2.4316 | 0.00000 |
| 323 | 2.4357 | 0.00000 |
| 324 | 2.4538 | 0.00000 |
| 325 | 2.4608 | 0.00000 |
| 326 | 2.5215 | 0.00000 |
| 327 | 2.5362 | 0.00000 |
| 328 | 2.7002 | 0.00000 |
| 329 | 2.7274 | 0.00000 |
| 330 | 2.7550 | 0.00000 |
| 331 | 2.7581 | 0.00000 |
| 332 | 2.7651 | 0.00000 |
| 333 | 2.8146 | 0.00000 |
| 334 | 2.8361 | 0.00000 |

|     |        |         |
|-----|--------|---------|
| 335 | 2.8613 | 0.00000 |
| 336 | 2.8911 | 0.00000 |
| 337 | 2.9236 | 0.00000 |
| 338 | 2.9464 | 0.00000 |
| 339 | 2.9794 | 0.00000 |
| 340 | 3.0065 | 0.00000 |
| 341 | 3.0347 | 0.00000 |
| 342 | 3.0431 | 0.00000 |
| 343 | 3.0664 | 0.00000 |
| 344 | 3.0862 | 0.00000 |
| 345 | 3.1486 | 0.00000 |
| 346 | 3.1617 | 0.00000 |
| 347 | 3.1789 | 0.00000 |
| 348 | 3.1924 | 0.00000 |
| 349 | 3.3000 | 0.00000 |
| 350 | 3.3210 | 0.00000 |
| 351 | 3.3512 | 0.00000 |
| 352 | 3.3666 | 0.00000 |
| 353 | 3.3876 | 0.00000 |
| 354 | 3.4306 | 0.00000 |
| 355 | 3.4750 | 0.00000 |
| 356 | 3.4856 | 0.00000 |

|     |        |         |
|-----|--------|---------|
| 357 | 3.4892 | 0.00000 |
| 358 | 3.5023 | 0.00000 |
| 359 | 3.6330 | 0.00000 |
| 360 | 3.6727 | 0.00000 |
| 361 | 3.6843 | 0.00000 |
| 362 | 3.7336 | 0.00000 |
| 363 | 3.7530 | 0.00000 |
| 364 | 3.7604 | 0.00000 |
| 365 | 3.7718 | 0.00000 |
| 366 | 3.7940 | 0.00000 |
| 367 | 3.8127 | 0.00000 |
| 368 | 3.8365 | 0.00000 |
| 369 | 3.8405 | 0.00000 |
| 370 | 3.8532 | 0.00000 |
| 371 | 3.8780 | 0.00000 |
| 372 | 3.8860 | 0.00000 |
| 373 | 3.9106 | 0.00000 |
| 374 | 3.9267 | 0.00000 |
| 375 | 3.9343 | 0.00000 |
| 376 | 3.9582 | 0.00000 |
| 377 | 3.9737 | 0.00000 |
| 378 | 3.9835 | 0.00000 |

|     |        |         |
|-----|--------|---------|
| 379 | 4.0158 | 0.00000 |
| 380 | 4.0670 | 0.00000 |
| 381 | 4.1646 | 0.00000 |
| 382 | 4.2470 | 0.00000 |
| 383 | 4.2581 | 0.00000 |
| 384 | 4.2588 | 0.00000 |
| 385 | 4.2861 | 0.00000 |
| 386 | 4.3136 | 0.00000 |
| 387 | 4.3282 | 0.00000 |
| 388 | 4.3410 | 0.00000 |
| 389 | 4.3728 | 0.00000 |
| 390 | 4.3828 | 0.00000 |
| 391 | 4.4170 | 0.00000 |
| 392 | 4.4446 | 0.00000 |
| 393 | 4.4676 | 0.00000 |
| 394 | 4.4802 | 0.00000 |
| 395 | 4.4881 | 0.00000 |
| 396 | 4.4966 | 0.00000 |
| 397 | 4.5170 | 0.00000 |
| 398 | 4.5521 | 0.00000 |
| 399 | 4.5921 | 0.00000 |
| 400 | 4.6084 | 0.00000 |

|     |        |         |
|-----|--------|---------|
| 401 | 4.6281 | 0.00000 |
| 402 | 4.6436 | 0.00000 |
| 403 | 4.6571 | 0.00000 |
| 404 | 4.6803 | 0.00000 |
| 405 | 4.7044 | 0.00000 |
| 406 | 4.7322 | 0.00000 |
| 407 | 4.7454 | 0.00000 |
| 408 | 4.7666 | 0.00000 |
| 409 | 4.7835 | 0.00000 |
| 410 | 4.7841 | 0.00000 |
| 411 | 4.7970 | 0.00000 |
| 412 | 4.8289 | 0.00000 |
| 413 | 4.8657 | 0.00000 |
| 414 | 4.8722 | 0.00000 |
| 415 | 4.8981 | 0.00000 |
| 416 | 4.9308 | 0.00000 |
| 417 | 4.9842 | 0.00000 |
| 418 | 5.0047 | 0.00000 |
| 419 | 5.0113 | 0.00000 |
| 420 | 5.0357 | 0.00000 |
| 421 | 5.0400 | 0.00000 |
| 422 | 5.0649 | 0.00000 |

|     |        |         |
|-----|--------|---------|
| 423 | 5.0819 | 0.00000 |
| 424 | 5.1139 | 0.00000 |
| 425 | 5.1177 | 0.00000 |
| 426 | 5.1372 | 0.00000 |
| 427 | 5.1411 | 0.00000 |
| 428 | 5.1564 | 0.00000 |
| 429 | 5.1756 | 0.00000 |
| 430 | 5.1856 | 0.00000 |
| 431 | 5.1890 | 0.00000 |
| 432 | 5.2151 | 0.00000 |
| 433 | 5.2363 | 0.00000 |
| 434 | 5.2406 | 0.00000 |
| 435 | 5.2560 | 0.00000 |
| 436 | 5.2917 | 0.00000 |
| 437 | 5.2973 | 0.00000 |
| 438 | 5.3102 | 0.00000 |
| 439 | 5.3307 | 0.00000 |
| 440 | 5.3505 | 0.00000 |
| 441 | 5.3685 | 0.00000 |
| 442 | 5.3752 | 0.00000 |
| 443 | 5.3955 | 0.00000 |
| 444 | 5.4207 | 0.00000 |

|     |        |         |
|-----|--------|---------|
| 445 | 5.4538 | 0.00000 |
| 446 | 5.4629 | 0.00000 |
| 447 | 5.4821 | 0.00000 |
| 448 | 5.4944 | 0.00000 |
| 449 | 5.5215 | 0.00000 |
| 450 | 5.5506 | 0.00000 |
| 451 | 5.5691 | 0.00000 |
| 452 | 5.5762 | 0.00000 |
| 453 | 5.5953 | 0.00000 |
| 454 | 5.6186 | 0.00000 |
| 455 | 5.6603 | 0.00000 |
| 456 | 5.6820 | 0.00000 |
| 457 | 5.7113 | 0.00000 |
| 458 | 5.7234 | 0.00000 |
| 459 | 5.7442 | 0.00000 |
| 460 | 5.7594 | 0.00000 |
| 461 | 5.7830 | 0.00000 |
| 462 | 5.7916 | 0.00000 |
| 463 | 5.7968 | 0.00000 |
| 464 | 5.8036 | 0.00000 |
| 465 | 5.8083 | 0.00000 |
| 466 | 5.8270 | 0.00000 |

|     |        |         |
|-----|--------|---------|
| 467 | 5.8460 | 0.00000 |
| 468 | 5.8614 | 0.00000 |
| 469 | 5.8804 | 0.00000 |
| 470 | 5.8861 | 0.00000 |
| 471 | 5.8940 | 0.00000 |
| 472 | 5.9145 | 0.00000 |
| 473 | 5.9239 | 0.00000 |
| 474 | 5.9481 | 0.00000 |
| 475 | 5.9666 | 0.00000 |
| 476 | 5.9801 | 0.00000 |
| 477 | 6.0126 | 0.00000 |
| 478 | 6.0215 | 0.00000 |
| 479 | 6.0344 | 0.00000 |
| 480 | 6.1422 | 0.00000 |

spin component 2

k-point 1 : 0.0000 0.0000 0.0000

| band No. | band energies | occupation |
|----------|---------------|------------|
| 1        | -27.2470      | 1.00000    |
| 2        | -21.5614      | 1.00000    |
| 3        | -21.4651      | 1.00000    |

|    |          |         |
|----|----------|---------|
| 4  | -21.0897 | 1.00000 |
| 5  | -21.0624 | 1.00000 |
| 6  | -21.0056 | 1.00000 |
| 7  | -20.9726 | 1.00000 |
| 8  | -20.9700 | 1.00000 |
| 9  | -20.8755 | 1.00000 |
| 10 | -20.5450 | 1.00000 |
| 11 | -20.4944 | 1.00000 |
| 12 | -20.3954 | 1.00000 |
| 13 | -20.3837 | 1.00000 |
| 14 | -20.1122 | 1.00000 |
| 15 | -19.9474 | 1.00000 |
| 16 | -19.6878 | 1.00000 |
| 17 | -19.6207 | 1.00000 |
| 18 | -19.5922 | 1.00000 |
| 19 | -19.5721 | 1.00000 |
| 20 | -19.5227 | 1.00000 |
| 21 | -19.5204 | 1.00000 |
| 22 | -19.4710 | 1.00000 |
| 23 | -19.4569 | 1.00000 |
| 24 | -19.0983 | 1.00000 |
| 25 | -19.0673 | 1.00000 |

|    |          |         |
|----|----------|---------|
| 26 | -18.9625 | 1.00000 |
| 27 | -18.9507 | 1.00000 |
| 28 | -18.8875 | 1.00000 |
| 29 | -18.6988 | 1.00000 |
| 30 | -18.4895 | 1.00000 |
| 31 | -18.3465 | 1.00000 |
| 32 | -18.2420 | 1.00000 |
| 33 | -18.2223 | 1.00000 |
| 34 | -18.1725 | 1.00000 |
| 35 | -18.1700 | 1.00000 |
| 36 | -18.0548 | 1.00000 |
| 37 | -18.0518 | 1.00000 |
| 38 | -17.5438 | 1.00000 |
| 39 | -17.2911 | 1.00000 |
| 40 | -17.2814 | 1.00000 |
| 41 | -17.2685 | 1.00000 |
| 42 | -17.2025 | 1.00000 |
| 43 | -17.2019 | 1.00000 |
| 44 | -17.1650 | 1.00000 |
| 45 | -17.0130 | 1.00000 |
| 46 | -16.9361 | 1.00000 |
| 47 | -16.9170 | 1.00000 |

|    |          |         |
|----|----------|---------|
| 48 | -16.8658 | 1.00000 |
| 49 | -16.8648 | 1.00000 |
| 50 | -16.8245 | 1.00000 |
| 51 | -16.8178 | 1.00000 |
| 52 | -16.8123 | 1.00000 |
| 53 | -16.8104 | 1.00000 |
| 54 | -16.7264 | 1.00000 |
| 55 | -16.7205 | 1.00000 |
| 56 | -16.1574 | 1.00000 |
| 57 | -15.7241 | 1.00000 |
| 58 | -15.6525 | 1.00000 |
| 59 | -15.6374 | 1.00000 |
| 60 | -15.6164 | 1.00000 |
| 61 | -15.5618 | 1.00000 |
| 62 | -15.5232 | 1.00000 |
| 63 | -15.5206 | 1.00000 |
| 64 | -15.1646 | 1.00000 |
| 65 | -14.8023 | 1.00000 |
| 66 | -14.5996 | 1.00000 |
| 67 | -14.5562 | 1.00000 |
| 68 | -14.4956 | 1.00000 |
| 69 | -14.4940 | 1.00000 |

|    |          |         |
|----|----------|---------|
| 70 | -14.4600 | 1.00000 |
| 71 | -14.4324 | 1.00000 |
| 72 | -14.3252 | 1.00000 |
| 73 | -14.2929 | 1.00000 |
| 74 | -14.2634 | 1.00000 |
| 75 | -14.2590 | 1.00000 |
| 76 | -14.1600 | 1.00000 |
| 77 | -14.1566 | 1.00000 |
| 78 | -13.8861 | 1.00000 |
| 79 | -13.7507 | 1.00000 |
| 80 | -13.5853 | 1.00000 |
| 81 | -13.5331 | 1.00000 |
| 82 | -13.5137 | 1.00000 |
| 83 | -13.4889 | 1.00000 |
| 84 | -13.4380 | 1.00000 |
| 85 | -13.3390 | 1.00000 |
| 86 | -13.3365 | 1.00000 |
| 87 | -13.1823 | 1.00000 |
| 88 | -12.7747 | 1.00000 |
| 89 | -12.7449 | 1.00000 |
| 90 | -12.7135 | 1.00000 |
| 91 | -12.6730 | 1.00000 |

|     |          |         |
|-----|----------|---------|
| 92  | -12.6659 | 1.00000 |
| 93  | -12.6169 | 1.00000 |
| 94  | -12.4442 | 1.00000 |
| 95  | -12.4272 | 1.00000 |
| 96  | -12.3735 | 1.00000 |
| 97  | -12.3181 | 1.00000 |
| 98  | -12.2040 | 1.00000 |
| 99  | -12.1938 | 1.00000 |
| 100 | -12.1587 | 1.00000 |
| 101 | -11.9533 | 1.00000 |
| 102 | -11.6771 | 1.00000 |
| 103 | -11.6209 | 1.00000 |
| 104 | -11.5875 | 1.00000 |
| 105 | -11.5799 | 1.00000 |
| 106 | -11.1327 | 1.00000 |
| 107 | -11.0888 | 1.00000 |
| 108 | -10.8863 | 1.00000 |
| 109 | -10.8732 | 1.00000 |
| 110 | -10.8262 | 1.00000 |
| 111 | -10.7002 | 1.00000 |
| 112 | -10.6802 | 1.00000 |
| 113 | -10.6570 | 1.00000 |

|     |          |         |
|-----|----------|---------|
| 114 | -10.6369 | 1.00000 |
| 115 | -10.5771 | 1.00000 |
| 116 | -10.5695 | 1.00000 |
| 117 | -10.5638 | 1.00000 |
| 118 | -10.5598 | 1.00000 |
| 119 | -10.5113 | 1.00000 |
| 120 | -10.5103 | 1.00000 |
| 121 | -10.4970 | 1.00000 |
| 122 | -10.4924 | 1.00000 |
| 123 | -10.3736 | 1.00000 |
| 124 | -10.2970 | 1.00000 |
| 125 | -10.2543 | 1.00000 |
| 126 | -10.1804 | 1.00000 |
| 127 | -10.1797 | 1.00000 |
| 128 | -10.1517 | 1.00000 |
| 129 | -10.0825 | 1.00000 |
| 130 | -9.8883  | 1.00000 |
| 131 | -9.8641  | 1.00000 |
| 132 | -9.7936  | 1.00000 |
| 133 | -9.7728  | 1.00000 |
| 134 | -9.7635  | 1.00000 |
| 135 | -9.6981  | 1.00000 |

|     |         |         |
|-----|---------|---------|
| 136 | -9.4520 | 1.00000 |
| 137 | -9.4194 | 1.00000 |
| 138 | -9.3795 | 1.00000 |
| 139 | -9.3759 | 1.00000 |
| 140 | -9.3713 | 1.00000 |
| 141 | -9.3554 | 1.00000 |
| 142 | -9.3080 | 1.00000 |
| 143 | -9.3016 | 1.00000 |
| 144 | -9.2952 | 1.00000 |
| 145 | -9.2853 | 1.00000 |
| 146 | -9.2447 | 1.00000 |
| 147 | -9.0874 | 1.00000 |
| 148 | -9.0016 | 1.00000 |
| 149 | -8.9932 | 1.00000 |
| 150 | -8.9417 | 1.00000 |
| 151 | -8.9383 | 1.00000 |
| 152 | -8.7866 | 1.00000 |
| 153 | -8.7332 | 1.00000 |
| 154 | -8.7274 | 1.00000 |
| 155 | -8.7081 | 1.00000 |
| 156 | -8.7020 | 1.00000 |
| 157 | -8.6654 | 1.00000 |

|     |         |         |
|-----|---------|---------|
| 158 | -8.6591 | 1.00000 |
| 159 | -8.6523 | 1.00000 |
| 160 | -8.6491 | 1.00000 |
| 161 | -8.5739 | 1.00000 |
| 162 | -8.5669 | 1.00000 |
| 163 | -8.5621 | 1.00000 |
| 164 | -8.5445 | 1.00000 |
| 165 | -8.4820 | 1.00000 |
| 166 | -8.4517 | 1.00000 |
| 167 | -8.4298 | 1.00000 |
| 168 | -8.3376 | 1.00000 |
| 169 | -8.2892 | 1.00000 |
| 170 | -8.2695 | 1.00000 |
| 171 | -8.2290 | 1.00000 |
| 172 | -8.2249 | 1.00000 |
| 173 | -8.2230 | 1.00000 |
| 174 | -8.1371 | 1.00000 |
| 175 | -8.1295 | 1.00000 |
| 176 | -8.0705 | 1.00000 |
| 177 | -8.0377 | 1.00000 |
| 178 | -8.0087 | 1.00000 |
| 179 | -8.0037 | 1.00000 |

|     |         |         |
|-----|---------|---------|
| 180 | -7.9641 | 1.00000 |
| 181 | -7.9548 | 1.00000 |
| 182 | -7.9159 | 1.00000 |
| 183 | -7.8860 | 1.00000 |
| 184 | -7.8669 | 1.00000 |
| 185 | -7.8587 | 1.00000 |
| 186 | -7.7876 | 1.00000 |
| 187 | -7.7835 | 1.00000 |
| 188 | -7.7342 | 1.00000 |
| 189 | -7.6743 | 1.00000 |
| 190 | -7.6321 | 1.00000 |
| 191 | -7.5923 | 1.00000 |
| 192 | -7.5720 | 1.00000 |
| 193 | -7.5498 | 1.00000 |
| 194 | -7.5352 | 1.00000 |
| 195 | -7.4679 | 1.00000 |
| 196 | -7.4678 | 1.00000 |
| 197 | -7.4226 | 1.00000 |
| 198 | -7.3182 | 1.00000 |
| 199 | -7.2314 | 1.00000 |
| 200 | -7.1613 | 1.00000 |
| 201 | -7.0506 | 1.00000 |

|     |         |         |
|-----|---------|---------|
| 202 | -7.0319 | 1.00000 |
| 203 | -7.0120 | 1.00000 |
| 204 | -6.9806 | 1.00000 |
| 205 | -6.9724 | 1.00000 |
| 206 | -6.9672 | 1.00000 |
| 207 | -6.9362 | 1.00000 |
| 208 | -6.8591 | 1.00000 |
| 209 | -6.8118 | 1.00000 |
| 210 | -6.7910 | 1.00000 |
| 211 | -6.7835 | 1.00000 |
| 212 | -6.7206 | 1.00000 |
| 213 | -6.6750 | 1.00000 |
| 214 | -6.4617 | 1.00000 |
| 215 | -6.3902 | 1.00000 |
| 216 | -6.3776 | 1.00000 |
| 217 | -6.3736 | 1.00000 |
| 218 | -6.3577 | 1.00000 |
| 219 | -6.3333 | 1.00000 |
| 220 | -6.2987 | 1.00000 |
| 221 | -6.2706 | 1.00000 |
| 222 | -6.2249 | 1.00000 |
| 223 | -6.2235 | 1.00000 |

|     |         |         |
|-----|---------|---------|
| 224 | -6.2180 | 1.00000 |
| 225 | -6.0419 | 1.00000 |
| 226 | -6.0039 | 1.00000 |
| 227 | -5.7517 | 1.00000 |
| 228 | -5.7062 | 1.00000 |
| 229 | -5.6863 | 1.00000 |
| 230 | -5.6310 | 1.00000 |
| 231 | -5.6184 | 1.00000 |
| 232 | -5.5394 | 1.00000 |
| 233 | -5.5186 | 1.00000 |
| 234 | -5.4358 | 1.00000 |
| 235 | -5.4063 | 1.00000 |
| 236 | -5.1415 | 1.00000 |
| 237 | -5.0552 | 1.00000 |
| 238 | -5.0206 | 1.00000 |
| 239 | -5.0171 | 1.00000 |
| 240 | -4.9535 | 1.00000 |
| 241 | -4.8723 | 1.00000 |
| 242 | -4.8494 | 1.00000 |
| 243 | -4.7968 | 1.00000 |
| 244 | -4.7719 | 1.00000 |
| 245 | -4.6483 | 1.00000 |

|     |         |         |
|-----|---------|---------|
| 246 | -4.5736 | 1.00000 |
| 247 | -4.5706 | 1.00000 |
| 248 | -4.4692 | 1.00000 |
| 249 | -4.4164 | 1.00000 |
| 250 | -4.3894 | 1.00000 |
| 251 | -4.2920 | 1.00000 |
| 252 | -4.2201 | 1.00000 |
| 253 | -4.1702 | 1.00000 |
| 254 | -3.5154 | 1.00000 |
| 255 | -3.3039 | 1.00000 |
| 256 | -3.1312 | 1.00000 |
| 257 | -2.9400 | 1.00000 |
| 258 | -2.7941 | 1.00000 |
| 259 | -2.7340 | 1.00000 |
| 260 | -2.0541 | 0.00000 |
| 261 | -1.9104 | 0.00000 |
| 262 | -1.7164 | 0.00000 |
| 263 | -1.6736 | 0.00000 |
| 264 | -1.2805 | 0.00000 |
| 265 | -1.2650 | 0.00000 |
| 266 | -1.1476 | 0.00000 |
| 267 | -0.7145 | 0.00000 |

|     |         |         |
|-----|---------|---------|
| 268 | -0.5789 | 0.00000 |
| 269 | -0.5042 | 0.00000 |
| 270 | -0.2757 | 0.00000 |
| 271 | -0.2725 | 0.00000 |
| 272 | -0.2548 | 0.00000 |
| 273 | -0.1515 | 0.00000 |
| 274 | -0.0528 | 0.00000 |
| 275 | -0.0432 | 0.00000 |
| 276 | 0.0184  | 0.00000 |
| 277 | 0.0451  | 0.00000 |
| 278 | 0.0844  | 0.00000 |
| 279 | 0.2130  | 0.00000 |
| 280 | 0.2607  | 0.00000 |
| 281 | 0.2846  | 0.00000 |
| 282 | 0.4390  | 0.00000 |
| 283 | 0.4568  | 0.00000 |
| 284 | 0.4876  | 0.00000 |
| 285 | 0.5995  | 0.00000 |
| 286 | 0.6944  | 0.00000 |
| 287 | 0.8218  | 0.00000 |
| 288 | 0.8751  | 0.00000 |
| 289 | 1.0568  | 0.00000 |

|     |        |         |
|-----|--------|---------|
| 290 | 1.1081 | 0.00000 |
| 291 | 1.1447 | 0.00000 |
| 292 | 1.1779 | 0.00000 |
| 293 | 1.2329 | 0.00000 |
| 294 | 1.2510 | 0.00000 |
| 295 | 1.3108 | 0.00000 |
| 296 | 1.3210 | 0.00000 |
| 297 | 1.3622 | 0.00000 |
| 298 | 1.4320 | 0.00000 |
| 299 | 1.4752 | 0.00000 |
| 300 | 1.5033 | 0.00000 |
| 301 | 1.5797 | 0.00000 |
| 302 | 1.6047 | 0.00000 |
| 303 | 1.6538 | 0.00000 |
| 304 | 1.6876 | 0.00000 |
| 305 | 1.7599 | 0.00000 |
| 306 | 1.7759 | 0.00000 |
| 307 | 1.8741 | 0.00000 |
| 308 | 1.8968 | 0.00000 |
| 309 | 1.9099 | 0.00000 |
| 310 | 1.9192 | 0.00000 |
| 311 | 2.1405 | 0.00000 |

|     |        |         |
|-----|--------|---------|
| 312 | 2.1965 | 0.00000 |
| 313 | 2.2214 | 0.00000 |
| 314 | 2.2547 | 0.00000 |
| 315 | 2.2897 | 0.00000 |
| 316 | 2.2981 | 0.00000 |
| 317 | 2.3373 | 0.00000 |
| 318 | 2.3636 | 0.00000 |
| 319 | 2.3854 | 0.00000 |
| 320 | 2.4109 | 0.00000 |
| 321 | 2.4292 | 0.00000 |
| 322 | 2.4370 | 0.00000 |
| 323 | 2.4444 | 0.00000 |
| 324 | 2.4590 | 0.00000 |
| 325 | 2.4659 | 0.00000 |
| 326 | 2.5241 | 0.00000 |
| 327 | 2.5419 | 0.00000 |
| 328 | 2.7051 | 0.00000 |
| 329 | 2.7338 | 0.00000 |
| 330 | 2.7552 | 0.00000 |
| 331 | 2.7609 | 0.00000 |
| 332 | 2.7734 | 0.00000 |
| 333 | 2.8287 | 0.00000 |

|     |        |         |
|-----|--------|---------|
| 334 | 2.8495 | 0.00000 |
| 335 | 2.8747 | 0.00000 |
| 336 | 2.9023 | 0.00000 |
| 337 | 2.9323 | 0.00000 |
| 338 | 2.9558 | 0.00000 |
| 339 | 2.9842 | 0.00000 |
| 340 | 3.0081 | 0.00000 |
| 341 | 3.0384 | 0.00000 |
| 342 | 3.0500 | 0.00000 |
| 343 | 3.0720 | 0.00000 |
| 344 | 3.0938 | 0.00000 |
| 345 | 3.1512 | 0.00000 |
| 346 | 3.1696 | 0.00000 |
| 347 | 3.1881 | 0.00000 |
| 348 | 3.2007 | 0.00000 |
| 349 | 3.3059 | 0.00000 |
| 350 | 3.3254 | 0.00000 |
| 351 | 3.3598 | 0.00000 |
| 352 | 3.3701 | 0.00000 |
| 353 | 3.3908 | 0.00000 |
| 354 | 3.4360 | 0.00000 |
| 355 | 3.4803 | 0.00000 |

|     |        |         |
|-----|--------|---------|
| 356 | 3.4919 | 0.00000 |
| 357 | 3.4984 | 0.00000 |
| 358 | 3.5088 | 0.00000 |
| 359 | 3.6380 | 0.00000 |
| 360 | 3.6766 | 0.00000 |
| 361 | 3.6967 | 0.00000 |
| 362 | 3.7394 | 0.00000 |
| 363 | 3.7569 | 0.00000 |
| 364 | 3.7622 | 0.00000 |
| 365 | 3.7767 | 0.00000 |
| 366 | 3.7990 | 0.00000 |
| 367 | 3.8158 | 0.00000 |
| 368 | 3.8435 | 0.00000 |
| 369 | 3.8495 | 0.00000 |
| 370 | 3.8673 | 0.00000 |
| 371 | 3.8820 | 0.00000 |
| 372 | 3.8955 | 0.00000 |
| 373 | 3.9205 | 0.00000 |
| 374 | 3.9383 | 0.00000 |
| 375 | 3.9498 | 0.00000 |
| 376 | 3.9598 | 0.00000 |
| 377 | 3.9829 | 0.00000 |

|     |        |         |
|-----|--------|---------|
| 378 | 3.9870 | 0.00000 |
| 379 | 4.0220 | 0.00000 |
| 380 | 4.0764 | 0.00000 |
| 381 | 4.1711 | 0.00000 |
| 382 | 4.2599 | 0.00000 |
| 383 | 4.2620 | 0.00000 |
| 384 | 4.2699 | 0.00000 |
| 385 | 4.2936 | 0.00000 |
| 386 | 4.3216 | 0.00000 |
| 387 | 4.3349 | 0.00000 |
| 388 | 4.3503 | 0.00000 |
| 389 | 4.3829 | 0.00000 |
| 390 | 4.3878 | 0.00000 |
| 391 | 4.4228 | 0.00000 |
| 392 | 4.4486 | 0.00000 |
| 393 | 4.4727 | 0.00000 |
| 394 | 4.4834 | 0.00000 |
| 395 | 4.4948 | 0.00000 |
| 396 | 4.4995 | 0.00000 |
| 397 | 4.5202 | 0.00000 |
| 398 | 4.5565 | 0.00000 |
| 399 | 4.5952 | 0.00000 |

|     |        |         |
|-----|--------|---------|
| 400 | 4.6112 | 0.00000 |
| 401 | 4.6298 | 0.00000 |
| 402 | 4.6469 | 0.00000 |
| 403 | 4.6601 | 0.00000 |
| 404 | 4.6862 | 0.00000 |
| 405 | 4.7093 | 0.00000 |
| 406 | 4.7375 | 0.00000 |
| 407 | 4.7508 | 0.00000 |
| 408 | 4.7699 | 0.00000 |
| 409 | 4.7872 | 0.00000 |
| 410 | 4.7893 | 0.00000 |
| 411 | 4.8028 | 0.00000 |
| 412 | 4.8337 | 0.00000 |
| 413 | 4.8707 | 0.00000 |
| 414 | 4.8859 | 0.00000 |
| 415 | 4.9028 | 0.00000 |
| 416 | 4.9414 | 0.00000 |
| 417 | 4.9939 | 0.00000 |
| 418 | 5.0101 | 0.00000 |
| 419 | 5.0138 | 0.00000 |
| 420 | 5.0395 | 0.00000 |
| 421 | 5.0449 | 0.00000 |

|     |        |         |
|-----|--------|---------|
| 422 | 5.0692 | 0.00000 |
| 423 | 5.0861 | 0.00000 |
| 424 | 5.1174 | 0.00000 |
| 425 | 5.1217 | 0.00000 |
| 426 | 5.1413 | 0.00000 |
| 427 | 5.1444 | 0.00000 |
| 428 | 5.1724 | 0.00000 |
| 429 | 5.1804 | 0.00000 |
| 430 | 5.1896 | 0.00000 |
| 431 | 5.1939 | 0.00000 |
| 432 | 5.2201 | 0.00000 |
| 433 | 5.2387 | 0.00000 |
| 434 | 5.2438 | 0.00000 |
| 435 | 5.2617 | 0.00000 |
| 436 | 5.3001 | 0.00000 |
| 437 | 5.3045 | 0.00000 |
| 438 | 5.3135 | 0.00000 |
| 439 | 5.3349 | 0.00000 |
| 440 | 5.3546 | 0.00000 |
| 441 | 5.3726 | 0.00000 |
| 442 | 5.3826 | 0.00000 |
| 443 | 5.3980 | 0.00000 |

|     |        |         |
|-----|--------|---------|
| 444 | 5.4292 | 0.00000 |
| 445 | 5.4599 | 0.00000 |
| 446 | 5.4693 | 0.00000 |
| 447 | 5.4879 | 0.00000 |
| 448 | 5.4985 | 0.00000 |
| 449 | 5.5287 | 0.00000 |
| 450 | 5.5680 | 0.00000 |
| 451 | 5.5754 | 0.00000 |
| 452 | 5.5960 | 0.00000 |
| 453 | 5.6070 | 0.00000 |
| 454 | 5.6284 | 0.00000 |
| 455 | 5.6729 | 0.00000 |
| 456 | 5.6927 | 0.00000 |
| 457 | 5.7204 | 0.00000 |
| 458 | 5.7275 | 0.00000 |
| 459 | 5.7477 | 0.00000 |
| 460 | 5.7628 | 0.00000 |
| 461 | 5.7906 | 0.00000 |
| 462 | 5.7949 | 0.00000 |
| 463 | 5.7996 | 0.00000 |
| 464 | 5.8058 | 0.00000 |
| 465 | 5.8215 | 0.00000 |

|     |        |         |
|-----|--------|---------|
| 466 | 5.8265 | 0.00000 |
| 467 | 5.8584 | 0.00000 |
| 468 | 5.8639 | 0.00000 |
| 469 | 5.8866 | 0.00000 |
| 470 | 5.8922 | 0.00000 |
| 471 | 5.8952 | 0.00000 |
| 472 | 5.9122 | 0.00000 |
| 473 | 5.9344 | 0.00000 |
| 474 | 5.9555 | 0.00000 |
| 475 | 5.9640 | 0.00000 |
| 476 | 5.9862 | 0.00000 |
| 477 | 6.0039 | 0.00000 |
| 478 | 6.0375 | 0.00000 |
| 479 | 6.0494 | 0.00000 |
| 480 | 6.1074 | 0.00000 |

-----

soft charge-density along one line, spin component

1

0

1

2

3

4

5

6

7

8 9

total charge-density along one line

soft charge-density along one line, spin component 2

0 1 2 3 4 5 6 7

8 9

total charge-density along one line

pseudopotential strength for first ion, spin component: 1

-2.331 -4.014 -0.002 0.000 0.000

-4.014 -6.828 -0.006 0.000 -0.000

-0.002 -0.006 -0.336 -0.000 0.000

0.000 0.000 -0.000 -0.341 -0.000

0.000 -0.000 0.000 -0.000 -0.341

pseudopotential strength for first ion, spin component: 2

-2.331 -4.014 -0.002 0.000 0.000

-4.014 -6.827 -0.006 0.000 -0.000

-0.002 -0.006 -0.336 -0.000 0.000

0.000 0.000 -0.000 -0.341 -0.000

0.000 -0.000 0.000 -0.000 -0.341

total augmentation occupancy for first ion, spin component: 1

3.579 -0.646 0.444 -0.034 -0.000

-0.646 0.130 -0.082 0.006 0.000

0.444 -0.082 0.056 -0.003 -0.000

-0.034 0.006 -0.003 0.011 0.000

-0.000 0.000 -0.000 0.000 0.007

total augmentation occupancy for first ion, spin component: 2

-0.000 0.000 -0.000 0.000 0.000

0.000 -0.000 0.000 -0.000 -0.000

-0.000 0.000 -0.000 -0.000 -0.000

0.000 -0.000 -0.000 -0.000 -0.000

0.000 -0.000 -0.000 -0.000 -0.000

----- aborting loop because EDIFF is reached -----

total charge

# of ion s p d tot

-----

|    |       |       |       |       |
|----|-------|-------|-------|-------|
| 1  | 0.646 | 0.043 | 0.000 | 0.690 |
| 2  | 0.646 | 0.043 | 0.000 | 0.690 |
| 3  | 0.646 | 0.043 | 0.000 | 0.690 |
| 4  | 0.646 | 0.043 | 0.000 | 0.690 |
| 5  | 0.646 | 0.043 | 0.000 | 0.690 |
| 6  | 0.646 | 0.043 | 0.000 | 0.690 |
| 7  | 0.646 | 0.043 | 0.000 | 0.690 |
| 8  | 0.646 | 0.043 | 0.000 | 0.690 |
| 9  | 0.646 | 0.043 | 0.000 | 0.690 |
| 10 | 0.646 | 0.043 | 0.000 | 0.690 |
| 11 | 0.646 | 0.043 | 0.000 | 0.690 |
| 12 | 0.646 | 0.043 | 0.000 | 0.690 |
| 13 | 0.646 | 0.043 | 0.000 | 0.689 |
| 14 | 0.646 | 0.043 | 0.000 | 0.689 |
| 15 | 0.649 | 0.045 | 0.000 | 0.693 |
| 16 | 0.646 | 0.043 | 0.000 | 0.689 |
| 17 | 0.646 | 0.043 | 0.000 | 0.689 |
| 18 | 0.646 | 0.043 | 0.000 | 0.689 |
| 19 | 0.646 | 0.043 | 0.000 | 0.689 |
| 20 | 0.646 | 0.043 | 0.000 | 0.689 |
| 21 | 0.646 | 0.043 | 0.000 | 0.689 |
| 22 | 0.646 | 0.044 | 0.000 | 0.690 |

|    |       |       |       |       |
|----|-------|-------|-------|-------|
| 23 | 0.541 | 0.015 | 0.000 | 0.556 |
| 24 | 0.541 | 0.015 | 0.000 | 0.556 |
| 25 | 0.870 | 1.763 | 0.000 | 2.633 |
| 26 | 0.867 | 1.785 | 0.000 | 2.653 |
| 27 | 0.867 | 1.786 | 0.000 | 2.653 |
| 28 | 0.870 | 1.762 | 0.000 | 2.632 |
| 29 | 0.865 | 1.783 | 0.000 | 2.648 |
| 30 | 0.870 | 1.763 | 0.000 | 2.633 |
| 31 | 0.867 | 1.786 | 0.000 | 2.653 |
| 32 | 0.867 | 1.786 | 0.000 | 2.653 |
| 33 | 0.870 | 1.762 | 0.000 | 2.632 |
| 34 | 0.865 | 1.783 | 0.000 | 2.648 |
| 35 | 0.870 | 1.763 | 0.000 | 2.633 |
| 36 | 0.868 | 1.787 | 0.000 | 2.654 |
| 37 | 0.867 | 1.786 | 0.000 | 2.653 |
| 38 | 0.870 | 1.763 | 0.000 | 2.633 |
| 39 | 0.865 | 1.784 | 0.000 | 2.649 |
| 40 | 0.870 | 1.763 | 0.000 | 2.633 |
| 41 | 0.868 | 1.787 | 0.000 | 2.655 |
| 42 | 0.867 | 1.786 | 0.000 | 2.653 |
| 43 | 0.871 | 1.764 | 0.000 | 2.634 |
| 44 | 0.865 | 1.783 | 0.000 | 2.648 |

|    |       |       |       |       |
|----|-------|-------|-------|-------|
| 45 | 0.870 | 1.763 | 0.000 | 2.633 |
| 46 | 0.867 | 1.786 | 0.000 | 2.653 |
| 47 | 0.867 | 1.786 | 0.000 | 2.653 |
| 48 | 0.871 | 1.763 | 0.000 | 2.634 |
| 49 | 0.865 | 1.783 | 0.000 | 2.648 |
| 50 | 0.870 | 1.763 | 0.000 | 2.633 |
| 51 | 0.867 | 1.786 | 0.000 | 2.653 |
| 52 | 0.867 | 1.786 | 0.000 | 2.653 |
| 53 | 0.870 | 1.762 | 0.000 | 2.632 |
| 54 | 0.865 | 1.784 | 0.000 | 2.648 |
| 55 | 0.865 | 1.784 | 0.000 | 2.649 |
| 56 | 0.865 | 1.786 | 0.000 | 2.651 |
| 57 | 0.866 | 1.787 | 0.000 | 2.653 |
| 58 | 0.866 | 1.790 | 0.000 | 2.656 |
| 59 | 0.865 | 1.786 | 0.000 | 2.651 |
| 60 | 0.866 | 1.786 | 0.000 | 2.651 |
| 61 | 0.866 | 1.788 | 0.000 | 2.654 |
| 62 | 0.867 | 1.791 | 0.000 | 2.658 |
| 63 | 0.865 | 1.784 | 0.000 | 2.649 |
| 64 | 0.865 | 1.786 | 0.000 | 2.651 |
| 65 | 0.866 | 1.787 | 0.000 | 2.652 |
| 66 | 0.865 | 1.788 | 0.000 | 2.653 |

|    |       |       |       |       |
|----|-------|-------|-------|-------|
| 67 | 0.865 | 1.786 | 0.000 | 2.651 |
| 68 | 0.866 | 1.785 | 0.000 | 2.651 |
| 69 | 0.865 | 1.787 | 0.000 | 2.652 |
| 70 | 0.866 | 1.787 | 0.000 | 2.653 |
| 71 | 0.865 | 1.784 | 0.000 | 2.649 |
| 72 | 0.865 | 1.786 | 0.000 | 2.651 |
| 73 | 0.866 | 1.786 | 0.000 | 2.652 |
| 74 | 0.864 | 1.785 | 0.000 | 2.649 |
| 75 | 0.865 | 1.786 | 0.000 | 2.651 |
| 76 | 0.866 | 1.786 | 0.000 | 2.651 |
| 77 | 0.865 | 1.786 | 0.000 | 2.651 |
| 78 | 0.865 | 1.784 | 0.000 | 2.649 |
| 79 | 0.865 | 1.784 | 0.000 | 2.649 |
| 80 | 0.865 | 1.786 | 0.000 | 2.651 |
| 81 | 0.865 | 1.785 | 0.000 | 2.650 |
| 82 | 0.863 | 1.782 | 0.000 | 2.645 |
| 83 | 0.865 | 1.786 | 0.000 | 2.651 |
| 84 | 0.866 | 1.786 | 0.000 | 2.651 |
| 85 | 0.865 | 1.784 | 0.000 | 2.648 |
| 86 | 0.862 | 1.774 | 0.000 | 2.636 |
| 87 | 0.865 | 1.784 | 0.000 | 2.649 |
| 88 | 0.865 | 1.787 | 0.000 | 2.652 |

|     |       |       |       |       |
|-----|-------|-------|-------|-------|
| 89  | 0.865 | 1.785 | 0.000 | 2.650 |
| 90  | 0.865 | 1.788 | 0.000 | 2.653 |
| 91  | 0.865 | 1.786 | 0.000 | 2.651 |
| 92  | 0.866 | 1.786 | 0.000 | 2.651 |
| 93  | 0.864 | 1.783 | 0.000 | 2.647 |
| 94  | 0.866 | 1.785 | 0.000 | 2.651 |
| 95  | 0.865 | 1.784 | 0.000 | 2.649 |
| 96  | 0.865 | 1.786 | 0.000 | 2.651 |
| 97  | 0.866 | 1.787 | 0.000 | 2.653 |
| 98  | 0.866 | 1.789 | 0.000 | 2.655 |
| 99  | 0.865 | 1.786 | 0.000 | 2.651 |
| 100 | 0.866 | 1.786 | 0.000 | 2.651 |
| 101 | 0.865 | 1.787 | 0.000 | 2.652 |
| 102 | 0.867 | 1.790 | 0.000 | 2.657 |
| 103 | 0.865 | 1.786 | 0.000 | 2.651 |
| 104 | 0.867 | 1.785 | 0.000 | 2.653 |
| 105 | 0.866 | 1.786 | 0.000 | 2.652 |
| 106 | 0.870 | 1.778 | 0.000 | 2.648 |
| 107 | 0.869 | 1.765 | 0.000 | 2.635 |
| 108 | 0.865 | 1.783 | 0.000 | 2.648 |
| 109 | 0.869 | 1.789 | 0.000 | 2.658 |
| 110 | 0.865 | 1.786 | 0.000 | 2.651 |

|     |       |       |       |       |
|-----|-------|-------|-------|-------|
| 111 | 0.867 | 1.785 | 0.000 | 2.653 |
| 112 | 0.867 | 1.789 | 0.000 | 2.655 |
| 113 | 0.871 | 1.782 | 0.000 | 2.653 |
| 114 | 0.869 | 1.765 | 0.000 | 2.634 |
| 115 | 0.865 | 1.783 | 0.000 | 2.648 |
| 116 | 0.870 | 1.791 | 0.000 | 2.661 |
| 117 | 0.865 | 1.786 | 0.000 | 2.651 |
| 118 | 0.867 | 1.785 | 0.000 | 2.653 |
| 119 | 0.865 | 1.782 | 0.000 | 2.647 |
| 120 | 0.857 | 1.707 | 0.000 | 2.564 |
| 121 | 0.869 | 1.765 | 0.000 | 2.634 |
| 122 | 0.865 | 1.783 | 0.000 | 2.648 |
| 123 | 0.866 | 1.778 | 0.000 | 2.644 |
| 124 | 0.866 | 1.786 | 0.000 | 2.652 |
| 125 | 0.867 | 1.785 | 0.000 | 2.653 |
| 126 | 0.862 | 1.776 | 0.000 | 2.638 |
| 127 | 0.846 | 1.820 | 0.000 | 2.666 |
| 128 | 0.870 | 1.767 | 0.000 | 2.637 |
| 129 | 0.865 | 1.783 | 0.000 | 2.648 |
| 130 | 0.860 | 1.757 | 0.000 | 2.617 |
| 131 | 0.866 | 1.786 | 0.000 | 2.652 |
| 132 | 0.867 | 1.784 | 0.000 | 2.652 |

|     |       |       |       |       |
|-----|-------|-------|-------|-------|
| 133 | 0.864 | 1.787 | 0.000 | 2.651 |
| 134 | 0.869 | 1.790 | 0.000 | 2.659 |
| 135 | 0.869 | 1.767 | 0.000 | 2.636 |
| 136 | 0.865 | 1.783 | 0.000 | 2.648 |
| 137 | 0.866 | 1.772 | 0.000 | 2.638 |
| 138 | 0.866 | 1.786 | 0.000 | 2.652 |
| 139 | 0.867 | 1.785 | 0.000 | 2.652 |
| 140 | 0.866 | 1.788 | 0.000 | 2.653 |
| 141 | 0.870 | 1.779 | 0.000 | 2.649 |
| 142 | 0.869 | 1.766 | 0.000 | 2.635 |
| 143 | 0.865 | 1.783 | 0.000 | 2.648 |
| 144 | 0.869 | 1.790 | 0.000 | 2.659 |
| 145 | 0.945 | 1.726 | 0.000 | 2.671 |
| 146 | 1.240 | 1.546 | 0.074 | 2.860 |
| 147 | 1.636 | 3.543 | 0.000 | 5.179 |

-----

tot            123.064 221.564    0.074 344.702

magnetization (x)

| # of ion | s      | p      | d     | tot    |
|----------|--------|--------|-------|--------|
| 1        | 0.000  | -0.000 | 0.000 | 0.000  |
| 2        | -0.000 | 0.000  | 0.000 | -0.000 |
| 3        | 0.000  | -0.000 | 0.000 | 0.000  |
| 4        | -0.000 | 0.000  | 0.000 | -0.000 |
| 5        | 0.000  | -0.000 | 0.000 | 0.000  |
| 6        | -0.000 | 0.000  | 0.000 | -0.000 |
| 7        | 0.000  | -0.000 | 0.000 | 0.000  |
| 8        | -0.000 | 0.000  | 0.000 | -0.000 |
| 9        | 0.000  | -0.000 | 0.000 | 0.000  |
| 10       | -0.000 | 0.000  | 0.000 | -0.000 |
| 11       | 0.000  | -0.000 | 0.000 | 0.000  |
| 12       | -0.000 | 0.000  | 0.000 | -0.000 |
| 13       | 0.000  | -0.000 | 0.000 | 0.000  |
| 14       | -0.004 | 0.002  | 0.000 | -0.002 |
| 15       | 0.000  | -0.000 | 0.000 | 0.000  |
| 16       | -0.004 | 0.002  | 0.000 | -0.002 |
| 17       | -0.004 | 0.002  | 0.000 | -0.002 |
| 18       | 0.000  | -0.000 | 0.000 | 0.000  |
| 19       | -0.003 | 0.001  | 0.000 | -0.002 |
| 20       | 0.000  | -0.000 | 0.000 | 0.000  |

|    |        |        |       |        |
|----|--------|--------|-------|--------|
| 21 | -0.003 | 0.002  | 0.000 | -0.002 |
| 22 | -0.003 | 0.002  | 0.000 | -0.002 |
| 23 | -0.000 | 0.000  | 0.000 | -0.000 |
| 24 | -0.000 | 0.000  | 0.000 | -0.000 |
| 25 | -0.000 | -0.007 | 0.000 | -0.008 |
| 26 | -0.000 | -0.002 | 0.000 | -0.002 |
| 27 | 0.000  | 0.003  | 0.000 | 0.003  |
| 28 | 0.000  | 0.005  | 0.000 | 0.005  |
| 29 | 0.000  | 0.003  | 0.000 | 0.003  |
| 30 | -0.000 | -0.007 | 0.000 | -0.008 |
| 31 | -0.000 | -0.002 | 0.000 | -0.002 |
| 32 | 0.000  | 0.003  | 0.000 | 0.003  |
| 33 | 0.000  | 0.005  | 0.000 | 0.005  |
| 34 | 0.000  | 0.002  | 0.000 | 0.002  |
| 35 | -0.000 | -0.007 | 0.000 | -0.008 |
| 36 | -0.000 | -0.002 | 0.000 | -0.002 |
| 37 | 0.000  | 0.003  | 0.000 | 0.003  |
| 38 | 0.000  | 0.006  | 0.000 | 0.007  |
| 39 | 0.000  | 0.002  | 0.000 | 0.002  |
| 40 | -0.000 | -0.007 | 0.000 | -0.008 |
| 41 | -0.000 | -0.002 | 0.000 | -0.002 |
| 42 | 0.000  | 0.002  | 0.000 | 0.003  |

|    |        |        |       |        |
|----|--------|--------|-------|--------|
| 43 | 0.000  | 0.005  | 0.000 | 0.005  |
| 44 | 0.000  | 0.004  | 0.000 | 0.004  |
| 45 | -0.000 | -0.007 | 0.000 | -0.008 |
| 46 | -0.000 | -0.002 | 0.000 | -0.002 |
| 47 | 0.000  | 0.002  | 0.000 | 0.003  |
| 48 | 0.000  | 0.005  | 0.000 | 0.006  |
| 49 | 0.000  | 0.001  | 0.000 | 0.001  |
| 50 | -0.000 | -0.007 | 0.000 | -0.008 |
| 51 | -0.000 | -0.002 | 0.000 | -0.002 |
| 52 | 0.000  | 0.002  | 0.000 | 0.003  |
| 53 | 0.000  | 0.006  | 0.000 | 0.007  |
| 54 | 0.000  | 0.002  | 0.000 | 0.002  |
| 55 | -0.000 | -0.005 | 0.000 | -0.006 |
| 56 | -0.000 | -0.007 | 0.000 | -0.007 |
| 57 | -0.000 | -0.001 | 0.000 | -0.001 |
| 58 | -0.000 | -0.001 | 0.000 | -0.001 |
| 59 | 0.000  | 0.006  | 0.000 | 0.007  |
| 60 | 0.000  | 0.003  | 0.000 | 0.003  |
| 61 | 0.000  | 0.001  | 0.000 | 0.001  |
| 62 | 0.000  | 0.002  | 0.000 | 0.003  |
| 63 | -0.000 | -0.005 | 0.000 | -0.006 |
| 64 | -0.000 | -0.007 | 0.000 | -0.007 |

|    |        |        |       |        |
|----|--------|--------|-------|--------|
| 65 | -0.000 | -0.001 | 0.000 | -0.001 |
| 66 | -0.000 | -0.001 | 0.000 | -0.001 |
| 67 | 0.000  | 0.006  | 0.000 | 0.006  |
| 68 | 0.000  | 0.003  | 0.000 | 0.003  |
| 69 | 0.000  | 0.001  | 0.000 | 0.001  |
| 70 | 0.000  | 0.002  | 0.000 | 0.002  |
| 71 | -0.000 | -0.005 | 0.000 | -0.006 |
| 72 | -0.000 | -0.007 | 0.000 | -0.007 |
| 73 | -0.000 | -0.001 | 0.000 | -0.001 |
| 74 | -0.000 | -0.002 | 0.000 | -0.002 |
| 75 | 0.000  | 0.006  | 0.000 | 0.007  |
| 76 | 0.000  | 0.003  | 0.000 | 0.004  |
| 77 | 0.000  | 0.003  | 0.000 | 0.003  |
| 78 | 0.000  | 0.001  | 0.000 | 0.001  |
| 79 | -0.000 | -0.005 | 0.000 | -0.006 |
| 80 | -0.000 | -0.007 | 0.000 | -0.007 |
| 81 | -0.000 | -0.001 | 0.000 | -0.002 |
| 82 | -0.000 | -0.002 | 0.000 | -0.002 |
| 83 | 0.001  | 0.007  | 0.000 | 0.007  |
| 84 | 0.000  | 0.003  | 0.000 | 0.003  |
| 85 | 0.000  | 0.002  | 0.000 | 0.002  |
| 86 | 0.000  | 0.005  | 0.000 | 0.006  |

|     |        |        |       |        |
|-----|--------|--------|-------|--------|
| 87  | -0.000 | -0.005 | 0.000 | -0.005 |
| 88  | -0.000 | -0.007 | 0.000 | -0.007 |
| 89  | -0.000 | -0.001 | 0.000 | -0.002 |
| 90  | -0.000 | -0.002 | 0.000 | -0.002 |
| 91  | 0.001  | 0.008  | 0.000 | 0.008  |
| 92  | 0.000  | 0.003  | 0.000 | 0.003  |
| 93  | 0.000  | 0.002  | 0.000 | 0.003  |
| 94  | 0.000  | 0.001  | 0.000 | 0.001  |
| 95  | -0.000 | -0.005 | 0.000 | -0.006 |
| 96  | -0.000 | -0.007 | 0.000 | -0.007 |
| 97  | -0.000 | -0.001 | 0.000 | -0.001 |
| 98  | -0.000 | -0.001 | 0.000 | -0.001 |
| 99  | 0.001  | 0.007  | 0.000 | 0.007  |
| 100 | 0.000  | 0.003  | 0.000 | 0.004  |
| 101 | 0.000  | 0.003  | 0.000 | 0.003  |
| 102 | 0.000  | 0.002  | 0.000 | 0.002  |
| 103 | -0.001 | -0.010 | 0.000 | -0.011 |
| 104 | -0.003 | -0.028 | 0.000 | -0.031 |
| 105 | -0.000 | -0.001 | 0.000 | -0.002 |
| 106 | -0.000 | -0.004 | 0.000 | -0.004 |
| 107 | 0.007  | 0.115  | 0.000 | 0.122  |
| 108 | 0.001  | 0.010  | 0.000 | 0.011  |

|     |        |        |       |        |
|-----|--------|--------|-------|--------|
| 109 | 0.000  | 0.001  | 0.000 | 0.001  |
| 110 | -0.001 | -0.010 | 0.000 | -0.011 |
| 111 | -0.003 | -0.028 | 0.000 | -0.031 |
| 112 | -0.000 | -0.001 | 0.000 | -0.002 |
| 113 | -0.000 | -0.003 | 0.000 | -0.003 |
| 114 | 0.007  | 0.120  | 0.000 | 0.127  |
| 115 | 0.001  | 0.010  | 0.000 | 0.011  |
| 116 | 0.000  | 0.001  | 0.000 | 0.002  |
| 117 | -0.001 | -0.010 | 0.000 | -0.011 |
| 118 | -0.003 | -0.026 | 0.000 | -0.029 |
| 119 | -0.000 | -0.002 | 0.000 | -0.002 |
| 120 | -0.000 | -0.002 | 0.000 | -0.002 |
| 121 | 0.007  | 0.115  | 0.000 | 0.122  |
| 122 | 0.001  | 0.010  | 0.000 | 0.010  |
| 123 | 0.000  | 0.003  | 0.000 | 0.003  |
| 124 | -0.001 | -0.010 | 0.000 | -0.011 |
| 125 | -0.003 | -0.024 | 0.000 | -0.027 |
| 126 | -0.000 | -0.002 | 0.000 | -0.002 |
| 127 | -0.000 | 0.001  | 0.000 | 0.001  |
| 128 | 0.006  | 0.104  | 0.000 | 0.110  |
| 129 | 0.001  | 0.009  | 0.000 | 0.010  |
| 130 | 0.000  | 0.004  | 0.000 | 0.004  |

|     |        |        |        |        |
|-----|--------|--------|--------|--------|
| 131 | -0.001 | -0.009 | 0.000  | -0.010 |
| 132 | -0.003 | -0.024 | 0.000  | -0.027 |
| 133 | -0.000 | -0.002 | 0.000  | -0.002 |
| 134 | -0.000 | -0.002 | 0.000  | -0.002 |
| 135 | 0.006  | 0.097  | 0.000  | 0.102  |
| 136 | 0.001  | 0.009  | 0.000  | 0.010  |
| 137 | 0.000  | 0.004  | 0.000  | 0.004  |
| 138 | -0.001 | -0.010 | 0.000  | -0.011 |
| 139 | -0.003 | -0.026 | 0.000  | -0.029 |
| 140 | -0.000 | -0.002 | 0.000  | -0.002 |
| 141 | -0.000 | -0.003 | 0.000  | -0.003 |
| 142 | 0.006  | 0.105  | 0.000  | 0.111  |
| 143 | 0.001  | 0.010  | 0.000  | 0.010  |
| 144 | 0.000  | 0.002  | 0.000  | 0.003  |
| 145 | 0.000  | 0.005  | 0.000  | 0.006  |
| 146 | -0.000 | 0.000  | -0.000 | 0.000  |
| 147 | 0.000  | 0.004  | 0.000  | 0.004  |

-----

|     |       |       |        |       |
|-----|-------|-------|--------|-------|
| tot | 0.001 | 0.513 | -0.000 | 0.514 |
|-----|-------|-------|--------|-------|

CHARGE:   cpu time      0.5224: real time      0.5242

FORLOC:   cpu time      0.0199: real time      0.0199

FORNL : cpu time 2.0696: real time 2.0840  
 STRESS: cpu time 6.2301: real time 6.2532  
 FORCOR: cpu time 0.1415: real time 0.1423  
 FORHAR: cpu time 0.0328: real time 0.0329  
 MIXING: cpu time 0.0105: real time 0.0106  
 OFIELD: cpu time 0.0002: real time 0.0002

-----

DFTD3 V3.0 Rev 1

Edisp (eV) -6.61770

E6 (eV): -3.9313

E8 (eV): -2.6864

% E8 : 40.59

FORVDW: cpu time 1.7852: real time 1.8215

FORCE on cell =-STRESS in cart. coord. units (eV):

|           |    |    |    |    |    |    |
|-----------|----|----|----|----|----|----|
| Direction | XX | YY | ZZ | XY | YZ | ZX |
|-----------|----|----|----|----|----|----|

-----

Alpha Z 233.50077 233.50077 233.50077

Ewald 107573.96327 23480.77830-39729.32422 10.26183 3455.09611 129.11670

|                     |              |              |                 |          |             |            |
|---------------------|--------------|--------------|-----------------|----------|-------------|------------|
| Hartree             | 106094.90783 | 25035.71845  | -23797.03112    | -6.56260 | 2945.88593  | 93.32398   |
| E(xc)               | -1914.26306  | -1916.61568  | -1979.91715     | 0.13246  | 1.82458     | 0.13166    |
| Local               | *****        | -53964.61555 | 57020.49303     | -0.21976 | -6358.71617 | -218.93046 |
| n-local             | -472.70442   | -482.52188   | -439.65613      | -0.69807 | -0.83007    | -0.32950   |
| augment             | -38.25994    | -38.58114    | -34.31782       | 0.00653  | -0.99147    | -0.00354   |
| Kinetic             | 7635.37254   | 7638.80451   | 8714.00360      | -3.09641 | -41.48820   | -3.20399   |
| Fock                | 0.00000      | 0.00000      | 0.00000         | 0.00000  | 0.00000     | 0.00000    |
| vdW                 | -2.64369     | -1.49410     | -6.59320        | 0.00169  | -0.07496    | 0.01176    |
| -----               |              |              |                 |          |             |            |
| Total               | -17.73482    | -15.02632    | -18.84224       | -0.17432 | 0.70574     | 0.11662    |
| in kB               | -4.89047     | -4.14359     | -5.19585        | -0.04807 | 0.19461     | 0.03216    |
| external pressure = |              | -4.74 kB     | Pullay stress = |          | 0.00 kB     |            |

VOLUME and BASIS-vectors are now :

-----

energy-cutoff : 400.00

volume of cell : 5810.14

| direct lattice vectors |             |             | reciprocal lattice vectors |             |             |
|------------------------|-------------|-------------|----------------------------|-------------|-------------|
| 14.78060000            | 0.00000000  | 0.00000000  | 0.067656252                | 0.00000000  | 0.00000000  |
| 0.00000000             | 21.33390000 | 0.00000000  | 0.00000000                 | 0.046873755 | 0.00000000  |
| 0.00000000             | 0.00000000  | 18.42570000 | 0.00000000                 | 0.00000000  | 0.054272022 |

length of vectors

14.780600000 21.333900000 18.425700000 0.067656252 0.046873755 0.054272022

FORCES acting on ions

electron-ion (+dipol)

ewald-force

non-local-force

convergence-correction

-----

|           |           |           |           |           |           |           |           |   |
|-----------|-----------|-----------|-----------|-----------|-----------|-----------|-----------|---|
| 0.455E-02 | 0.154E+03 | 0.361E+02 | -.304E-02 | -.160E+03 | -.357E+02 | -.180E-02 | 0.566E+01 | - |
| .438E+00  | -.788E-07 | 0.488E-06 | 0.547E-06 |           |           |           |           |   |
| -.186E-01 | 0.155E+03 | -.340E+02 | 0.162E-01 | -.160E+03 | 0.335E+02 | 0.114E-02 | 0.565E+01 |   |
| 0.541E+00 | -.118E-05 | -.556E-06 | -.310E-06 |           |           |           |           |   |
| 0.184E+00 | 0.154E+03 | 0.360E+02 | -.184E+00 | -.160E+03 | -.356E+02 | 0.127E-04 | 0.565E+01 | - |
| .443E+00  | -.124E-06 | 0.804E-06 | 0.688E-07 |           |           |           |           |   |
| 0.112E+00 | 0.155E+03 | -.341E+02 | -.989E-01 | -.160E+03 | 0.336E+02 | -.174E-01 | 0.565E+01 |   |
| 0.535E+00 | 0.194E-07 | 0.127E-06 | -.706E-06 |           |           |           |           |   |
| 0.172E+00 | 0.154E+03 | 0.362E+02 | -.173E+00 | -.160E+03 | -.357E+02 | 0.117E-02 | 0.566E+01 | - |
| .440E+00  | -.512E-07 | 0.651E-06 | 0.610E-06 |           |           |           |           |   |
| 0.126E+00 | 0.154E+03 | -.340E+02 | -.108E+00 | -.160E+03 | 0.334E+02 | -.211E-01 | 0.565E+01 |   |
| 0.541E+00 | 0.114E-05 | -.956E-07 | 0.436E-07 |           |           |           |           |   |
| -.192E-01 | 0.154E+03 | 0.363E+02 | 0.180E-01 | -.160E+03 | -.359E+02 | 0.159E-02 | 0.566E+01 | - |

.431E+00    -.579E-08 0.275E-06 0.156E-05  
          -.128E-01 0.154E+03 -.338E+02    0.196E-01 -.160E+03 0.332E+02    -.719E-02 0.565E+01  
0.555E+00    0.981E-06 -.970E-06 0.118E-05  
          -.182E+00 0.154E+03 0.363E+02    0.182E+00 -.160E+03 -.359E+02    0.251E-03 0.565E+01 -  
.429E+00    0.147E-06 0.686E-07 0.201E-05  
          -.128E+00 0.155E+03 -.337E+02    0.115E+00 -.160E+03 0.331E+02    0.109E-01 0.565E+01  
0.561E+00    0.611E-07 -.160E-05 0.156E-05  
          -.174E+00 0.154E+03 0.362E+02    0.176E+00 -.160E+03 -.358E+02    -.178E-02 0.566E+01 -  
.432E+00    0.110E-06 0.119E-06 0.153E-05  
          -.115E+00 0.155E+03 -.338E+02    0.960E-01 -.160E+03 0.332E+02    0.192E-01 0.565E+01  
0.555E+00    -.102E-05 -.140E-05 0.849E-06  
          0.228E+01 -.150E+03 -.386E+02    -.227E+01 0.156E+03 0.386E+02    -.103E-01 -.566E+01  
0.768E-01    0.577E-06 -.351E-06 0.866E-08  
          -.415E+00 -.151E+03 0.388E+02    0.417E+00 0.157E+03 -.386E+02    -.132E-02 -.567E+01 -  
.269E+00    0.106E-06 -.434E-06 -.351E-07  
          0.136E+02 -.146E+03 -.413E+02    -.138E+02 0.151E+03 0.413E+02    0.257E+00 -.567E+01 -  
.346E-01    -.414E-07 -.845E-07 -.344E-06  
          0.162E+01 -.151E+03 0.402E+02    -.162E+01 0.156E+03 -.400E+02    -.993E-03 -.567E+01 -  
.229E+00    0.257E-06 -.412E-07 0.750E-06  
          0.352E+01 -.149E+03 0.443E+02    -.352E+01 0.155E+03 -.441E+02    -.189E-02 -.567E+01 -  
.180E+00    0.348E-06 -.119E-06 0.710E-06  
          -.148E+02 -.146E+03 -.330E+02    0.149E+02 0.151E+03 0.329E+02    -.980E-01 -.566E+01

0.502E-01 - .115E-05 0.643E-06 0.951E-06  
-.297E+01 -.149E+03 0.432E+02 0.296E+01 0.155E+03 -.430E+02 0.114E-01 -.567E+01 -  
.241E+00 -.371E-06 -.634E-06 -.512E-06  
-.379E+01 -.150E+03 -.385E+02 0.379E+01 0.155E+03 0.385E+02 -.649E-02 -.566E+01  
0.242E-01 0.165E-06 -.304E-06 0.247E-06  
-.207E+01 -.151E+03 0.395E+02 0.207E+01 0.156E+03 -.392E+02 0.146E-02 -.566E+01 -  
.282E+00 -.338E-06 -.755E-06 -.572E-06  
0.150E-02 -.148E+03 0.486E+02 0.614E-02 0.154E+03 -.484E+02 -.556E-02 -.569E+01 -  
.158E+00 0.271E-07 -.401E-06 -.420E-07  
0.196E+02 -.103E+03 0.222E+02 -.212E+02 0.103E+03 -.246E+02 0.153E+01 0.140E+00  
0.238E+01 -.559E-07 -.754E-06 0.542E-06  
-.191E+02 -.103E+03 0.154E+02 0.215E+02 0.103E+03 -.169E+02 -.241E+01 -.118E+00  
0.152E+01 0.133E-06 -.121E-05 0.149E-05  
0.714E-01 0.461E+03 0.202E+03 -.746E-01 -.462E+03 -.201E+03 0.381E-02 0.102E+01 -  
.219E+00 0.483E-06 0.266E-06 0.453E-06  
0.212E+00 0.353E+03 -.234E+03 -.212E+00 -.353E+03 0.234E+03 0.260E-02 0.441E+00 -  
.370E-01 -.989E-06 0.899E-06 -.329E-05  
-.244E-01 0.351E+03 0.240E+03 0.231E-01 -.351E+03 -.241E+03 0.311E-02 0.407E+00  
0.562E-01 0.111E-05 -.110E-05 0.119E-05  
-.173E+00 0.462E+03 -.195E+03 0.180E+00 -.463E+03 0.195E+03 -.669E-02 0.105E+01  
0.233E+00 -.303E-05 -.124E-05 -.225E-05  
-.622E-01 0.210E+03 -.272E+03 0.662E-01 -.210E+03 0.272E+03 -.448E-02 0.925E-01

0.561E-01    -.283E-06 0.121E-05 -.214E-05  
0.562E+00 0.461E+03 0.202E+03    -.565E+00 -.462E+03 -.201E+03    0.204E-02 0.102E+01 -  
.214E+00    -.449E-06 0.961E-06 -.100E-05  
0.106E+01 0.352E+03 -.234E+03    -.107E+01 -.353E+03 0.234E+03    0.161E-01 0.447E+00 -  
.424E-01    0.158E-05 0.531E-06 -.239E-05  
0.413E+00 0.351E+03 0.240E+03    -.415E+00 -.351E+03 -.240E+03    0.303E-02 0.407E+00  
0.490E-01    0.248E-06 -.556E-06 -.133E-05  
0.578E+00 0.462E+03 -.195E+03    -.583E+00 -.463E+03 0.195E+03    0.484E-02 0.105E+01  
0.235E+00    0.328E-06 0.119E-05 -.337E-05  
0.687E+00 0.210E+03 -.272E+03    -.693E+00 -.210E+03 0.272E+03    0.622E-02 0.902E-01  
0.616E-01    0.625E-06 0.103E-05 -.144E-05  
0.426E+00 0.461E+03 0.202E+03    -.428E+00 -.462E+03 -.202E+03    0.390E-02 0.102E+01 -  
.214E+00    -.888E-06 0.384E-06 0.123E-05  
0.938E+00 0.352E+03 -.233E+03    -.954E+00 -.352E+03 0.233E+03    0.152E-01 0.440E+00 -  
.376E-01    0.219E-05 -.252E-05 0.693E-06  
0.478E+00 0.351E+03 0.241E+03    -.480E+00 -.351E+03 -.241E+03    0.254E-02 0.405E+00  
0.510E-01    -.928E-06 -.545E-06 -.864E-06  
0.704E+00 0.462E+03 -.194E+03    -.715E+00 -.463E+03 0.194E+03    0.800E-02 0.106E+01  
0.242E+00    0.318E-05 -.110E-05 -.705E-06  
0.722E+00 0.210E+03 -.271E+03    -.731E+00 -.210E+03 0.271E+03    0.676E-02 0.901E-01  
0.593E-01    0.700E-06 -.103E-05 0.272E-06  
-.182E+00 0.461E+03 0.202E+03    0.178E+00 -.462E+03 -.202E+03    0.451E-02 0.102E+01 -

.218E+00    -.643E-06 -.556E-06 0.472E-05  
          -.294E+00 0.352E+03 -.233E+03    0.298E+00 -.352E+03 0.233E+03    -.209E-02 0.439E+00 -  
.298E-01    0.662E-06 -.505E-05 0.293E-05  
          0.398E-01 0.351E+03 0.241E+03    -.389E-01 -.351E+03 -.241E+03    0.228E-02 0.409E+00  
0.556E-01    -.120E-05 -.103E-05 0.227E-05  
          0.501E-01 0.462E+03 -.194E+03    -.562E-01 -.463E+03 0.194E+03    0.408E-02 0.106E+01  
0.232E+00    0.236E-05 -.518E-05 0.306E-05  
          -.479E-01 0.210E+03 -.271E+03    0.459E-01 -.210E+03 0.271E+03    -.293E-03 0.925E-01  
0.325E-01    0.128E-06 -.292E-05 0.133E-05  
          -.551E+00 0.461E+03 0.202E+03    0.550E+00 -.462E+03 -.202E+03    0.740E-03 0.101E+01 -  
.220E+00    0.465E-06 -.110E-05 0.613E-05  
          -.119E+01 0.352E+03 -.233E+03    0.120E+01 -.353E+03 0.233E+03    -.163E-01 0.446E+00 -  
.329E-01    -.117E-05 -.538E-05 0.217E-05  
          -.352E+00 0.351E+03 0.241E+03    0.349E+00 -.351E+03 -.241E+03    0.206E-02 0.413E+00  
0.622E-01    -.211E-06 -.144E-05 0.479E-05  
          -.411E+00 0.462E+03 -.194E+03    0.425E+00 -.463E+03 0.194E+03    -.116E-01 0.106E+01  
0.231E+00    -.409E-07 -.741E-05 0.417E-05  
          -.557E+00 0.210E+03 -.271E+03    0.562E+00 -.210E+03 0.271E+03    -.963E-02 0.905E-01  
0.526E-01    -.607E-06 -.263E-05 0.818E-06  
          -.475E+00 0.461E+03 0.202E+03    0.474E+00 -.462E+03 -.202E+03    0.301E-02 0.102E+01 -  
.221E+00    0.101E-05 -.742E-06 0.406E-05  
          -.804E+00 0.353E+03 -.234E+03    0.819E+00 -.353E+03 0.234E+03    -.150E-01 0.446E+00 -

.392E-01    -.225E-05 -.240E-05 -.909E-06  
              -.373E+00 0.351E+03 0.241E+03    0.368E+00 -.351E+03 -.241E+03    0.906E-03 0.410E+00  
0.624E-01    0.993E-06 -.153E-05 0.428E-05  
              -.594E+00 0.462E+03 -.194E+03    0.607E+00 -.463E+03 0.194E+03    -.172E-01 0.105E+01  
0.234E+00    -.284E-05 -.564E-05 0.164E-05  
              -.585E+00 0.210E+03 -.272E+03    0.596E+00 -.210E+03 0.272E+03    -.103E-01 0.981E-01  
0.566E-01    -.623E-06 -.773E-06 -.986E-06  
              -.757E-02 0.206E+03 0.279E+03    0.109E-01 -.206E+03 -.279E+03    -.363E-02 0.682E-01 -  
.414E-01    0.133E-05 -.141E-05 -.845E-07  
              0.670E+00 0.303E+02 0.296E+03    -.665E+00 -.302E+02 -.296E+03    -.469E-02 -.413E-01  
0.723E-02    0.466E-06 -.149E-05 -.152E-06  
              -.844E+00 0.144E+03 -.282E+03    0.846E+00 -.144E+03 0.282E+03    -.322E-02 0.136E+00  
0.287E-01    0.861E-07 0.542E-06 -.105E-05  
              0.534E+00 -.215E+02 -.285E+03    -.535E+00 0.214E+02 0.285E+03    -.789E-03 0.375E-01  
0.186E-01    0.663E-06 0.162E-05 0.119E-05  
              0.503E+00 -.294E+02 0.293E+03    -.500E+00 0.294E+02 -.293E+03    -.555E-02 0.251E-01 -  
.306E-01    0.170E-06 -.787E-06 0.218E-06  
              0.525E+00 0.139E+03 0.289E+03    -.525E+00 -.139E+03 -.289E+03    0.177E-02 0.103E+00 -  
.250E-01    0.858E-06 -.169E-05 -.102E-05  
              -.126E+01 0.364E+02 -.287E+03    0.126E+01 -.364E+02 0.287E+03    -.180E-03 -.870E-02  
0.140E-01    0.584E-06 0.112E-05 0.483E-06  
              0.167E+01 -.130E+03 -.271E+03    -.169E+01 0.130E+03 0.271E+03    0.107E-01 -.887E-01

0.373E-01 0.875E-06 0.853E-06 0.193E-05  
0.397E+00 0.207E+03 0.280E+03 -0.395E+00 -0.207E+03 -0.280E+03 0.719E-03 0.691E-01 -  
.373E-01 0.372E-06 -0.164E-05 -0.176E-05  
0.918E+00 0.312E+02 0.296E+03 -0.922E+00 -0.311E+02 -0.296E+03 0.231E-02 -0.413E-01  
0.119E-01 -0.202E-07 -0.171E-05 -0.334E-06  
0.132E+01 0.144E+03 -0.282E+03 -0.133E+01 -0.144E+03 0.282E+03 0.509E-02 0.125E+00  
0.280E-01 0.108E-06 0.141E-05 -0.119E-05  
0.341E+01 -0.199E+02 -0.285E+03 -0.342E+01 0.199E+02 0.285E+03 0.140E-01 0.403E-01  
0.137E-01 -0.471E-06 0.150E-05 0.110E-05  
0.139E+01 -0.287E+02 0.294E+03 -0.139E+01 0.287E+02 -0.294E+03 -0.346E-02 0.249E-01 -  
.310E-01 0.194E-06 -0.151E-05 0.466E-06  
0.677E+00 0.139E+03 0.290E+03 -0.677E+00 -0.139E+03 -0.290E+03 0.657E-03 0.103E+00 -  
.297E-01 -0.269E-06 -0.178E-05 -0.158E-05  
0.160E+01 0.367E+02 -0.287E+03 -0.158E+01 -0.366E+02 0.287E+03 -0.125E-01 -0.217E-01  
0.130E-01 0.996E-07 0.161E-05 0.526E-06  
0.610E+01 -0.125E+03 -0.271E+03 -0.612E+01 0.125E+03 0.271E+03 0.226E-01 -0.901E-01  
0.146E-01 -0.110E-05 0.719E-06 0.123E-05  
0.366E+00 0.207E+03 0.280E+03 -0.371E+00 -0.207E+03 -0.280E+03 0.152E-03 0.680E-01 -  
.367E-01 -0.104E-05 -0.137E-05 -0.137E-05  
-0.415E-01 0.319E+02 0.296E+03 0.328E-01 -0.318E+02 -0.296E+03 0.106E-01 -0.365E-01  
0.136E-01 -0.551E-06 -0.674E-06 -0.199E-06  
0.209E+01 0.144E+03 -0.281E+03 -0.210E+01 -0.144E+03 0.281E+03 0.123E-01 0.119E+00

0.241E-01 0.404E-06 0.525E-06 -.121E-06  
0.302E+01 -.172E+02 -.283E+03 -.304E+01 0.171E+02 0.283E+03 0.249E-01 0.866E-01  
0.616E-01 -.856E-06 0.220E-06 0.780E-06  
0.105E+01 -.272E+02 0.294E+03 -.105E+01 0.272E+02 -.294E+03 0.295E-02 0.240E-01 -  
.378E-01 -.152E-07 -.103E-05 0.233E-06  
0.943E-01 0.140E+03 0.290E+03 -.959E-01 -.140E+03 -.290E+03 0.135E-02 0.107E+00 -  
.234E-01 -.120E-05 -.109E-05 -.449E-06  
0.276E+01 0.387E+02 -.286E+03 -.276E+01 -.387E+02 0.286E+03 0.162E-02 -.116E-01  
0.294E-01 -.283E-06 0.772E-06 0.758E-06  
0.591E+01 -.115E+03 -.267E+03 -.607E+01 0.115E+03 0.267E+03 0.154E+00 0.133E-02  
0.132E+00 -.350E-06 0.232E-05 0.765E-07  
-.244E+00 0.207E+03 0.280E+03 0.241E+00 -.207E+03 -.280E+03 0.441E-02 0.712E-01 -  
.389E-01 -.127E-05 -.969E-06 0.890E-06  
-.115E+01 0.314E+02 0.294E+03 0.114E+01 -.314E+02 -.294E+03 0.917E-02 -.314E-01  
0.519E-02 -.503E-06 0.463E-06 0.158E-06  
0.591E+00 0.144E+03 -.281E+03 -.609E+00 -.144E+03 0.281E+03 0.180E-01 0.125E+00  
0.438E-01 -.154E-06 -.119E-05 0.892E-06  
-.941E+00 -.159E+02 -.286E+03 0.932E+00 0.158E+02 0.286E+03 0.591E-02 0.900E-01  
0.807E-01 -.969E-06 0.153E-05 0.616E-06  
-.648E+00 -.265E+02 0.293E+03 0.645E+00 0.265E+02 -.293E+03 0.491E-02 0.232E-01 -  
.273E-01 -.230E-06 0.302E-06 -.153E-06  
-.535E+00 0.139E+03 0.289E+03 0.531E+00 -.139E+03 -.289E+03 0.653E-02 0.113E+00 -

.215E-01    -.875E-06 -.400E-06 0.127E-05  
0.770E+00 0.407E+02 -.287E+03    -.782E+00 -.407E+02 0.287E+03    0.539E-02 0.174E-02 -

.188E-01    -.976E-06 -.169E-06 0.804E-06  
-.462E+00 -.113E+03 -.276E+03    0.428E+00 0.113E+03 0.277E+03    0.343E-01 0.598E-01 -

.268E+00    -.198E-05 -.465E-05 -.558E-07  
-.572E+00 0.206E+03 0.279E+03    0.570E+00 -.206E+03 -.279E+03    0.114E-02 0.716E-01 -

.457E-01    -.361E-06 -.659E-06 0.260E-05  
-.781E+00 0.304E+02 0.294E+03    0.785E+00 -.304E+02 -.294E+03    -.759E-02 -.312E-01 -

.162E-02    0.118E-06 0.634E-06 0.288E-06  
-.123E+01 0.144E+03 -.281E+03    0.124E+01 -.144E+03 0.281E+03    -.160E-01 0.122E+00

0.505E-01    -.194E-06 -.193E-05 0.106E-05  
-.364E+01 -.174E+02 -.283E+03    0.367E+01 0.173E+02 0.283E+03    -.311E-01 0.116E+00

0.595E-01    0.481E-06 -.423E-06 0.754E-06  
-.130E+01 -.277E+02 0.291E+03    0.129E+01 0.277E+02 -.291E+03    -.136E-02 0.338E-01 -

.221E-01    -.118E-06 0.107E-05 -.381E-06  
-.346E+00 0.139E+03 0.289E+03    0.345E+00 -.139E+03 -.289E+03    -.315E-05 0.111E+00 -

.148E-01    0.371E-06 -.207E-06 0.173E-05  
-.822E+00 0.400E+02 -.287E+03    0.814E+00 -.400E+02 0.287E+03    0.121E-01 -.793E-02 -

.180E-01    0.306E-06 -.798E-06 0.801E-06  
-.782E+01 -.119E+03 -.267E+03    0.801E+01 0.119E+03 0.267E+03    -.190E+00 0.210E-02

0.367E-01    0.644E-06 0.333E-05 0.630E-06  
-.407E+00 0.206E+03 0.279E+03    0.409E+00 -.206E+03 -.279E+03    -.283E-02 0.711E-01 -

.466E-01 0.970E-06 -.832E-06 0.210E-05  
-.595E-01 0.300E+02 0.294E+03 0.693E-01 -.299E+02 -.294E+03 -.954E-02 -.351E-01  
0.938E-03 0.484E-06 -.351E-06 0.102E-06  
-.206E+01 0.145E+03 -.282E+03 0.207E+01 -.145E+03 0.282E+03 -.191E-01 0.131E+00  
0.257E-01 -.199E-06 -.856E-06 0.804E-07  
-.256E+01 -.208E+02 -.285E+03 0.258E+01 0.208E+02 0.285E+03 -.295E-01 0.399E-01  
0.321E-01 0.105E-05 0.810E-06 0.926E-06  
-.548E+00 -.290E+02 0.291E+03 0.553E+00 0.290E+02 -.291E+03 -.290E-02 0.289E-01 -  
.253E-01 0.472E-08 0.435E-06 -.185E-06  
0.611E-01 0.139E+03 0.289E+03 -.612E-01 -.139E+03 -.289E+03 -.382E-03 0.109E+00 -  
.210E-01 0.110E-05 -.854E-06 0.624E-06  
-.288E+01 0.377E+02 -.286E+03 0.290E+01 -.377E+02 0.286E+03 -.151E-01 -.456E-02  
0.212E-01 0.320E-06 -.515E-07 0.641E-06  
-.512E+01 -.128E+03 -.271E+03 0.517E+01 0.128E+03 0.271E+03 -.468E-01 -.871E-01  
0.380E-01 0.164E-05 0.101E-06 0.106E-05  
0.405E+00 -.137E+03 0.280E+03 -.397E+00 0.137E+03 -.280E+03 -.976E-02 -.128E+00 -  
.160E-01 -.401E-06 -.482E-06 0.723E-06  
0.194E+01 -.343E+03 0.233E+03 -.195E+01 0.344E+03 -.233E+03 0.905E-02 -.461E+00 -  
.553E-01 -.198E-06 -.518E-07 0.214E-05  
-.252E+01 -.197E+03 -.259E+03 0.253E+01 0.197E+03 0.259E+03 -.936E-02 -.199E+00  
0.370E-01 0.160E-05 -.160E-07 0.153E-05  
0.691E+01 -.447E+03 -.198E+03 -.693E+01 0.448E+03 0.198E+03 0.100E-01 -.112E+01

0.885E-01 0.156E-05 -.192E-05 0.724E-06  
-.460E+00 -.451E+03 0.204E+03 0.461E+00 0.452E+03 -.204E+03 -.230E-02 -.108E+01 -  
.113E+00 -.389E-06 -.112E-05 0.387E-06  
0.171E+01 -.203E+03 0.269E+03 -.171E+01 0.203E+03 -.269E+03 -.484E-02 -.931E-01 -  
.324E-01 -.234E-06 -.551E-06 0.185E-05  
-.210E+01 -.338E+03 -.222E+03 0.214E+01 0.338E+03 0.222E+03 -.441E-01 -.606E+00  
0.543E-01 0.175E-05 -.216E-05 0.896E-06  
0.218E+01 -.136E+03 0.282E+03 -.218E+01 0.136E+03 -.282E+03 -.631E-02 -.126E+00 -  
.985E-02 0.228E-06 -.933E-06 0.190E-05  
0.672E+01 -.339E+03 0.238E+03 -.670E+01 0.340E+03 -.238E+03 -.124E-01 -.462E+00 -  
.466E-01 0.106E-05 0.418E-06 0.308E-05  
0.678E+01 -.193E+03 -.259E+03 -.679E+01 0.193E+03 0.258E+03 0.112E-01 -.147E+00  
0.636E-01 0.436E-07 0.252E-06 0.167E-05  
0.312E+02 -.427E+03 -.198E+03 -.313E+02 0.428E+03 0.197E+03 0.726E-01 -.965E+00  
0.130E+00 -.710E-06 -.104E-05 -.722E-06  
0.544E+01 -.449E+03 0.209E+03 -.544E+01 0.450E+03 -.209E+03 0.689E-03 -.108E+01 -  
.803E-01 0.646E-06 0.105E-06 0.311E-05  
0.368E+01 -.201E+03 0.272E+03 -.368E+01 0.201E+03 -.272E+03 -.623E-03 -.979E-01 -  
.310E-01 0.608E-06 -.300E-06 0.237E-05  
0.124E+02 -.332E+03 -.223E+03 -.125E+02 0.332E+03 0.223E+03 0.120E+00 -.536E+00  
0.316E-01 0.339E-06 -.139E-05 0.781E-06  
0.219E+01 -.133E+03 0.283E+03 -.219E+01 0.133E+03 -.283E+03 0.681E-03 -.128E+00 -

.482E-02 0.631E-06 -.291E-06 0.131E-05  
0.492E+01 -.332E+03 0.245E+03 -.488E+01 0.332E+03 -.245E+03 -.316E-01 -.476E+00 -  
.380E-01 0.136E-05 0.968E-06 0.844E-06  
0.112E+02 -.182E+03 -.258E+03 -.112E+02 0.182E+03 0.258E+03 0.478E-01 -.993E-01 -  
.104E+00 0.827E-07 0.172E-05 0.970E-07  
0.316E+02 -.399E+03 -.175E+03 -.319E+02 0.401E+03 0.174E+03 0.291E+00 -.139E+01  
0.133E+01 0.394E-05 -.329E-06 0.191E-05  
0.930E+01 -.443E+03 0.219E+03 -.929E+01 0.444E+03 -.219E+03 -.510E-02 -.109E+01 -  
.484E-01 0.149E-05 0.683E-06 0.252E-05  
0.168E+01 -.196E+03 0.273E+03 -.169E+01 0.197E+03 -.273E+03 0.563E-02 -.109E+00 -  
.516E-01 0.946E-06 0.730E-06 0.676E-06  
0.172E+02 -.310E+03 -.216E+03 -.175E+02 0.310E+03 0.216E+03 0.325E+00 -.219E+00  
0.124E+00 -.538E-06 -.296E-05 -.505E-06  
-.104E+01 -.132E+03 0.281E+03 0.103E+01 0.132E+03 -.281E+03 0.103E-01 -.127E+00 -  
.216E-03 0.337E-06 0.819E-06 -.403E-06  
-.513E+01 -.331E+03 0.239E+03 0.512E+01 0.332E+03 -.239E+03 0.862E-02 -.494E+00 -  
.425E-01 0.157E-07 0.106E-05 -.233E-05  
0.151E+01 -.170E+03 -.261E+03 -.163E+01 0.169E+03 0.261E+03 0.117E+00 0.376E+00 -  
.981E-01 -.582E-05 -.239E-05 -.125E-06  
-.670E+01 -.303E+03 -.190E+03 0.626E+01 0.298E+03 0.187E+03 0.466E+00 0.534E+01  
0.398E+01 -.367E-05 0.132E-04 0.205E-05  
-.629E+00 -.436E+03 0.227E+03 0.626E+00 0.437E+03 -.227E+03 0.163E-02 -.119E+01 -

.478E-01 0.570E-06 0.458E-06 -.718E-06  
-.303E+01 -.197E+03 0.268E+03 0.302E+01 0.197E+03 -.268E+03 0.145E-01 -.112E+00 -  
.432E-01 0.185E-06 0.118E-05 -.173E-05  
0.309E+01 -.281E+03 -.215E+03 -.496E+01 0.280E+03 0.214E+03 0.191E+01 0.653E+00  
0.826E+00 -.939E-05 0.408E-05 0.188E-05  
-.274E+01 -.134E+03 0.277E+03 0.274E+01 0.134E+03 -.277E+03 0.240E-02 -.124E+00 -  
.189E-01 -.827E-07 0.119E-05 -.173E-05  
-.600E+01 -.338E+03 0.230E+03 0.600E+01 0.339E+03 -.230E+03 0.112E-01 -.494E+00 -  
.467E-01 -.854E-06 0.103E-06 -.304E-05  
-.644E+01 -.171E+03 -.257E+03 0.651E+01 0.170E+03 0.257E+03 -.762E-01 0.488E+00  
0.133E-01 0.622E-05 0.988E-06 0.565E-06  
-.440E+02 -.422E+03 -.184E+03 0.446E+02 0.423E+03 0.183E+03 -.558E+00 -.108E+01  
0.641E+00 -.442E-05 -.515E-05 0.292E-05  
-.867E+01 -.441E+03 0.211E+03 0.866E+01 0.442E+03 -.211E+03 0.142E-01 -.111E+01 -  
.762E-01 -.933E-06 -.514E-06 -.294E-05  
-.292E+01 -.201E+03 0.265E+03 0.293E+01 0.201E+03 -.265E+03 -.922E-02 -.110E+00 -  
.208E-01 -.545E-06 0.898E-06 -.216E-05  
-.142E+02 -.290E+03 -.209E+03 0.162E+02 0.289E+03 0.209E+03 -.198E+01 0.610E+00  
0.781E+00 0.122E-04 -.966E-06 0.116E-05  
-.138E+01 -.136E+03 0.277E+03 0.139E+01 0.136E+03 -.277E+03 -.103E-01 -.125E+00 -  
.243E-01 -.670E-06 0.687E-06 -.930E-06  
-.278E+01 -.343E+03 0.230E+03 0.276E+01 0.343E+03 -.230E+03 0.233E-01 -.474E+00 -

.599E-01    -.129E-05 -.384E-06 -.819E-06  
           -.103E+02 -.189E+03 -.258E+03    0.104E+02 0.189E+03 0.258E+03    -.775E-01 -.140E+00 -  
 .531E-01    -.165E-05 0.189E-05 0.742E-06  
           -.149E+02 -.446E+03 -.196E+03    0.150E+02 0.447E+03 0.196E+03    -.689E-01 -.112E+01  
 0.100E+00    0.167E-05 -.245E-05 0.566E-06  
           -.548E+01 -.448E+03 0.204E+03    0.549E+01 0.449E+03 -.203E+03    -.508E-02 -.108E+01 -  
 .125E+00    -.128E-05 -.173E-05 -.238E-05  
           -.905E+00 -.203E+03 0.267E+03    0.913E+00 0.203E+03 -.267E+03    -.921E-02 -.102E+00 -  
 .321E-01    -.940E-06 0.131E-06 -.248E-06  
           -.162E+02 -.329E+03 -.218E+03    0.166E+02 0.329E+03 0.218E+03    -.359E+00 -.481E+00  
 0.437E-01    -.217E-05 -.446E-05 0.112E-05  
           -.269E+01 -.252E+03 -.187E+03    0.158E+01 0.243E+03 0.181E+03    0.971E+00 0.764E+01  
 0.496E+01    -.299E-05 0.755E-05 0.555E-05  
           0.532E+02 -.518E+03 -.137E+03    -.543E+02 0.522E+03 0.140E+03    0.104E+01 -.395E+01 -  
 .382E+01    0.361E-05 -.331E-05 0.198E-05  
           -.471E+02 -.587E+03 -.449E+03    0.532E+02 0.640E+03 0.485E+03    -.602E+01 -.514E+02 -  
 .352E+02    -.769E-05 -.197E-04 -.406E-05  
 -----  
           0.454E+01 0.280E+02 0.232E+02    -.291E-12 0.136E-11 0.159E-11    -.459E+01 -.280E+02 -  
 .232E+02    -.648E-05 -.761E-04 0.768E-04

POSITION

TOTAL-FORCE (eV/Angst)

-----

|          |          |         |           |           |           |
|----------|----------|---------|-----------|-----------|-----------|
| 1.24575  | 4.02870  | 5.43979 | 0.000046  | 0.000985  | -0.000365 |
| 1.21024  | 4.07581  | 8.43726 | -0.000976 | 0.002533  | -0.001203 |
| 3.70862  | 4.02890  | 5.43965 | 0.000305  | 0.001857  | -0.001050 |
| 3.67998  | 4.07733  | 8.43690 | -0.004039 | -0.000497 | -0.002956 |
| 6.17157  | 4.02854  | 5.43942 | -0.000016 | -0.000174 | -0.001709 |
| 6.14482  | 4.08292  | 8.43295 | -0.002848 | -0.003379 | -0.003264 |
| 8.63513  | 4.02801  | 5.43869 | 0.000770  | -0.000483 | -0.001964 |
| 8.60339  | 4.08732  | 8.43089 | -0.000142 | -0.001250 | -0.002306 |
| 11.09928 | 4.02784  | 5.43885 | 0.000876  | 0.001931  | -0.002677 |
| 11.06021 | 4.08619  | 8.43099 | -0.001744 | 0.000630  | -0.000739 |
| 13.56311 | 4.02807  | 5.43972 | 0.000340  | 0.001585  | -0.001579 |
| 13.52141 | 4.08047  | 8.43349 | 0.000414  | -0.002333 | 0.000215  |
| 2.44241  | 15.48073 | 8.85224 | -0.000619 | -0.005149 | 0.002153  |
| 0.01714  | 15.44624 | 5.32469 | 0.000378  | 0.001559  | -0.001129 |
| 4.86040  | 15.47728 | 8.86623 | 0.000614  | 0.000422  | 0.000382  |
| 2.48016  | 15.44854 | 5.27562 | 0.000355  | -0.001188 | -0.000421 |
| 4.94382  | 15.44925 | 5.24869 | 0.001690  | -0.002903 | 0.000246  |
| 12.31531 | 15.48242 | 9.00211 | -0.002753 | 0.002877  | 0.000562  |
| 9.86772  | 15.44556 | 5.34176 | 0.000454  | -0.001029 | 0.000880  |
| 14.76279 | 15.48245 | 8.89951 | -0.005830 | -0.000253 | 0.005411  |

|          |          |         |           |           |           |
|----------|----------|---------|-----------|-----------|-----------|
| 12.33384 | 15.44510 | 5.36128 | 0.001408  | -0.003148 | -0.001291 |
| 7.40743  | 15.44616 | 5.26463 | 0.002356  | 0.001804  | 0.001243  |
| 6.44846  | 16.34427 | 7.40648 | -0.003986 | 0.001707  | 0.004050  |
| 8.60064  | 16.47644 | 7.89249 | 0.009111  | 0.001354  | 0.003307  |
| 1.24544  | 5.11881  | 5.35500 | 0.000972  | 0.000330  | -0.002524 |
| 2.44348  | 5.83889  | 8.62292 | 0.002419  | -0.004499 | 0.001214  |
| 0.01380  | 5.79530  | 5.28573 | 0.002061  | -0.002567 | 0.000488  |
| 1.21063  | 5.16420  | 8.54151 | 0.000286  | -0.000490 | -0.001789 |
| 2.44351  | 7.27931  | 8.74832 | -0.000141 | -0.001173 | -0.000088 |
| 3.70866  | 5.11896  | 5.35390 | -0.000440 | -0.001465 | 0.000276  |
| 4.90800  | 5.84315  | 8.62123 | -0.001024 | 0.003787  | -0.000788 |
| 2.47701  | 5.79561  | 5.28397 | 0.001439  | -0.000715 | -0.002592 |
| 3.67679  | 5.16572  | 8.54000 | -0.000173 | 0.001650  | 0.000051  |
| 4.90764  | 7.28398  | 8.74777 | 0.000922  | -0.000566 | 0.001076  |
| 6.17184  | 5.11860  | 5.35433 | 0.001459  | 0.000594  | 0.000808  |
| 7.37096  | 5.84929  | 8.62094 | -0.000715 | 0.007016  | -0.002445 |
| 4.94029  | 5.79548  | 5.28340 | 0.000615  | -0.002809 | -0.001157 |
| 6.14080  | 5.17108  | 8.53715 | -0.002527 | 0.002645  | 0.002602  |
| 7.37071  | 7.28983  | 8.75132 | -0.001969 | 0.001660  | 0.000159  |
| 8.63543  | 5.11820  | 5.35521 | 0.001259  | 0.001585  | -0.001157 |
| 9.83233  | 5.85166  | 8.62337 | 0.002747  | 0.000087  | -0.001117 |
| 7.40374  | 5.79498  | 5.28512 | 0.003442  | -0.002825 | -0.001320 |

|          |          |         |           |           |           |
|----------|----------|---------|-----------|-----------|-----------|
| 8.60194  | 5.17528  | 8.53759 | -0.001715 | -0.000188 | -0.000064 |
| 9.83204  | 7.29110  | 8.75719 | -0.001907 | -0.001922 | -0.002344 |
| 11.09930 | 5.11814  | 5.35578 | -0.000879 | -0.003112 | -0.001439 |
| 12.29449 | 5.84673  | 8.62385 | 0.000139  | 0.005606  | -0.002202 |
| 9.86750  | 5.79468  | 5.28678 | -0.000761 | -0.000878 | 0.001563  |
| 11.06261 | 5.17409  | 8.53894 | 0.002534  | 0.002898  | -0.000257 |
| 12.29428 | 7.28729  | 8.75533 | -0.004460 | 0.001305  | -0.001491 |
| 13.56278 | 5.11829  | 5.35605 | 0.002666  | 0.000739  | -0.002072 |
| 14.75895 | 5.83988  | 8.62434 | -0.000232 | -0.002686 | -0.002223 |
| 12.33118 | 5.79480  | 5.28692 | -0.004487 | -0.001604 | 0.002610  |
| 13.52535 | 5.16844  | 8.54022 | -0.003563 | 0.003919  | -0.001284 |
| 14.75917 | 7.28012  | 8.75179 | 0.000750  | 0.002546  | -0.000666 |
| 0.01434  | 7.23830  | 5.19017 | 0.000076  | -0.000195 | 0.000076  |
| 1.24689  | 9.38061  | 5.13160 | 0.000519  | -0.001830 | -0.000006 |
| 1.21085  | 7.98059  | 8.79588 | -0.000800 | -0.000497 | 0.001545  |
| 2.44214  | 10.12243 | 8.87141 | -0.001115 | 0.002218  | -0.005036 |
| 0.01532  | 10.08686 | 5.14049 | -0.002014 | -0.000129 | -0.002382 |
| 1.24606  | 7.94244  | 5.15775 | 0.002030  | -0.002602 | 0.000845  |
| 1.21082  | 9.41592  | 8.85782 | -0.000201 | 0.004588  | 0.000219  |
| 2.44072  | 11.55513 | 8.88414 | -0.006273 | -0.001499 | 0.001851  |
| 2.47747  | 7.23842  | 5.18585 | 0.002789  | 0.002913  | 0.001301  |
| 3.70997  | 9.38055  | 5.12566 | -0.001086 | -0.002988 | 0.000043  |

|         |          |         |           |           |           |
|---------|----------|---------|-----------|-----------|-----------|
| 3.67534 | 7.98360  | 8.79349 | -0.000625 | 0.001120  | 0.000948  |
| 4.90487 | 10.12925 | 8.87518 | 0.000732  | -0.001259 | -0.000051 |
| 2.47867 | 10.08713 | 5.12695 | -0.002263 | 0.001529  | 0.000774  |
| 3.70939 | 7.94242  | 5.15441 | 0.000805  | -0.004007 | -0.001682 |
| 3.67589 | 9.41970  | 8.85445 | -0.001624 | 0.002031  | -0.000122 |
| 4.90263 | 11.56506 | 8.89086 | 0.000410  | 0.003071  | 0.000826  |
| 4.94085 | 7.23830  | 5.18552 | -0.004693 | 0.002282  | 0.000823  |
| 6.17318 | 9.38002  | 5.13173 | 0.002063  | 0.002151  | 0.001823  |
| 6.13864 | 7.99044  | 8.79647 | 0.002368  | -0.000626 | -0.001667 |
| 7.36780 | 10.13760 | 8.89473 | -0.000255 | 0.002778  | 0.000996  |
| 4.94196 | 10.08682 | 5.12700 | 0.004118  | 0.001494  | -0.001137 |
| 6.17284 | 7.94199  | 5.15766 | -0.000074 | 0.000530  | 0.003041  |
| 6.13939 | 9.42660  | 8.86164 | 0.000133  | 0.000004  | -0.002049 |
| 7.36410 | 11.57721 | 8.92935 | 0.000097  | -0.000131 | 0.003111  |
| 7.40426 | 7.23794  | 5.19012 | 0.002135  | 0.001784  | 0.001072  |
| 8.63700 | 9.37970  | 5.14543 | -0.000467 | 0.003003  | 0.000935  |
| 8.60086 | 7.99568  | 8.80617 | 0.001347  | -0.001282 | -0.001222 |
| 9.83068 | 10.14286 | 8.92842 | -0.002236 | 0.000276  | -0.000208 |
| 7.40553 | 10.08627 | 5.14064 | 0.001154  | -0.003612 | 0.003169  |
| 8.63637 | 7.94166  | 5.16555 | 0.002639  | 0.001754  | -0.001394 |
| 8.60077 | 9.43254  | 8.88532 | -0.005984 | 0.003364  | -0.001258 |
| 9.82927 | 11.58244 | 9.00096 | 0.000636  | 0.007799  | 0.001040  |

|          |          |         |           |           |           |
|----------|----------|---------|-----------|-----------|-----------|
| 9.86805  | 7.23787  | 5.19489 | -0.000371 | 0.000137  | -0.000246 |
| 11.10106 | 9.37979  | 5.15156 | -0.003859 | -0.000994 | 0.000649  |
| 11.06331 | 7.99411  | 8.80818 | -0.000470 | -0.002147 | -0.000014 |
| 12.29815 | 10.12943 | 8.90340 | -0.000774 | -0.001155 | 0.001788  |
| 9.86930  | 10.08593 | 5.15631 | -0.005481 | -0.001548 | 0.001414  |
| 11.10021 | 7.94175  | 5.16862 | -0.000631 | -0.003093 | 0.001407  |
| 11.06206 | 9.43062  | 8.88839 | 0.004283  | 0.002550  | 0.002070  |
| 12.30255 | 11.56557 | 8.94694 | 0.002560  | 0.000362  | -0.001221 |
| 12.33169 | 7.23799  | 5.19447 | -0.001007 | 0.000257  | -0.001760 |
| 13.56437 | 9.38021  | 5.14435 | 0.000670  | 0.001693  | -0.000587 |
| 13.52754 | 7.98555  | 8.80171 | -0.000760 | -0.002906 | -0.003112 |
| 14.76233 | 10.12320 | 8.88285 | -0.005744 | 0.000340  | -0.001659 |
| 12.33257 | 10.08637 | 5.15511 | 0.002689  | 0.000482  | -0.001526 |
| 13.56350 | 7.94214  | 5.16485 | -0.000089 | -0.000911 | -0.000360 |
| 13.52731 | 9.42040  | 8.86925 | 0.000288  | 0.003534  | -0.000417 |
| 14.76430 | 11.55727 | 8.90646 | -0.002813 | 0.000301  | 0.001471  |
| 0.01611  | 11.52516 | 5.16621 | -0.001067 | -0.002500 | 0.000389  |
| 1.24770  | 13.67535 | 5.22209 | 0.002047  | -0.001767 | -0.002455 |
| 1.21217  | 12.26335 | 8.89409 | 0.001486  | -0.000416 | 0.001141  |
| 2.43998  | 14.38728 | 8.86748 | -0.001685 | -0.001381 | 0.000830  |
| 0.01699  | 14.35408 | 5.27295 | -0.000651 | -0.001325 | -0.001940 |
| 1.24794  | 12.22963 | 5.17275 | 0.001026  | 0.000934  | -0.001339 |

|         |          |         |           |           |           |
|---------|----------|---------|-----------|-----------|-----------|
| 1.21434 | 13.70818 | 8.88771 | -0.000131 | 0.004666  | 0.003684  |
| 2.47958 | 11.52580 | 5.14547 | -0.001617 | -0.000161 | -0.001494 |
| 3.71218 | 13.67636 | 5.19535 | 0.004470  | 0.001202  | 0.001124  |
| 3.66932 | 12.26248 | 8.88184 | -0.002767 | 0.000190  | -0.000607 |
| 4.89370 | 14.38589 | 8.86075 | 0.001987  | -0.003159 | -0.003050 |
| 2.48000 | 14.35596 | 5.23149 | 0.001218  | -0.001824 | 0.001689  |
| 3.71150 | 12.23022 | 5.15602 | 0.000909  | -0.004455 | 0.001029  |
| 3.66212 | 13.70366 | 8.87117 | -0.005652 | 0.006319  | -0.001573 |
| 4.94290 | 11.52542 | 5.14351 | -0.000082 | -0.001693 | -0.001604 |
| 6.17627 | 13.67505 | 5.20032 | 0.000639  | 0.001332  | 0.000141  |
| 6.13145 | 12.27911 | 8.90591 | 0.004040  | 0.005220  | 0.004516  |
| 7.36614 | 14.42967 | 8.88203 | -0.018037 | -0.003435 | -0.000131 |
| 4.94347 | 14.35627 | 5.21375 | 0.000215  | -0.002665 | 0.001185  |
| 6.17493 | 12.22917 | 5.16623 | -0.001379 | -0.001015 | 0.001520  |
| 6.11879 | 13.72336 | 8.87765 | 0.010228  | 0.009494  | 0.001897  |
| 7.40625 | 11.52413 | 5.16368 | 0.000896  | -0.003209 | 0.000357  |
| 8.63876 | 13.67323 | 5.24377 | 0.002006  | 0.003002  | -0.001243 |
| 8.58939 | 12.29067 | 9.00208 | 0.002496  | -0.007022 | -0.005660 |
| 9.83855 | 14.39048 | 9.30305 | 0.033192  | 0.413797  | 0.237461  |
| 7.40672 | 14.35386 | 5.23530 | -0.001049 | -0.001430 | -0.000429 |
| 8.63820 | 12.22778 | 5.19800 | 0.000371  | -0.001233 | 0.001035  |
| 8.55571 | 13.73596 | 9.04598 | 0.049708  | 0.050446  | 0.030588  |

|          |          |          |           |           |           |
|----------|----------|----------|-----------|-----------|-----------|
| 9.86985  | 11.52338 | 5.18893  | 0.001737  | -0.001777 | -0.000124 |
| 11.10099 | 13.67352 | 5.27669  | 0.003007  | -0.000061 | -0.000938 |
| 11.07378 | 12.27333 | 9.00891  | -0.004888 | -0.001855 | -0.007941 |
| 12.30694 | 14.38896 | 9.00333  | 0.015377  | -0.008463 | 0.003289  |
| 9.86934  | 14.35300 | 5.29564  | 0.002978  | -0.001005 | -0.000368 |
| 11.10161 | 12.22804 | 5.21650  | -0.001153 | -0.002666 | 0.001068  |
| 11.11464 | 13.70636 | 9.07877  | -0.049159 | 0.055941  | 0.028204  |
| 12.33326 | 11.52411 | 5.18815  | -0.000896 | 0.000413  | 0.000540  |
| 13.56430 | 13.67399 | 5.25995  | 0.001821  | 0.000621  | 0.000119  |
| 13.53626 | 12.26601 | 8.93587  | -0.001352 | 0.003136  | 0.001735  |
| 14.76266 | 14.38906 | 8.90426  | 0.000508  | -0.001504 | 0.003412  |
| 12.33397 | 14.35288 | 5.30710  | 0.002668  | -0.002715 | -0.001638 |
| 13.56505 | 12.22870 | 5.20105  | 0.000042  | 0.000163  | -0.001123 |
| 13.54921 | 13.70690 | 8.94399  | -0.006102 | 0.003567  | 0.004239  |
| 9.91126  | 15.54685 | 9.99472  | -0.131556 | -1.492130 | -0.905437 |
| 7.28864  | 16.40884 | 8.69813  | -0.009333 | -0.012874 | -0.007165 |
| 10.02526 | 16.50365 | 10.64498 | 0.115771  | 0.976037  | 0.633326  |

---

total drift:

-0.044234

0.023294

-0.023658

---

FREE ENERGIE OF THE ION-ELECTRON SYSTEM (eV)

-----

free energy TOTEN = -1209.37815505 eV

energy without entropy= -1209.37815505 energy(sigma->0) = -1209.37815505

d Force =-0.9518943E-02[-0.244E-01, 0.532E-02] d Energy =-0.9475737E-02-0.432E-04

d Force = 0.3691188E+01[ 0.366E+01, 0.372E+01] d Ewald = 0.3691029E+01 0.160E-03

-----

POTLOK: cpu time 0.1989: real time 0.1996

-----

stress matrix after NEB project (eV)

-17.73482      -0.17432      0.11662

-0.17432      -15.02632      0.70574

0.11662      0.70574      -18.84224

FORCES: max atom, RMS      1.750308      0.173612

FORCE total and by dimension      2.104930      1.492130

Stress total and by dimension      29.940409      18.842242

Finite differences progress:

Degree of freedom:    2/ 6

Displacement:            1/ 2

Total:                    3/ 12

LATTYP: Found a simple orthorhombic cell.

ALAT            =      14.7806000000

B/A-ratio    =      1.2466138046

C/A-ratio    =      1.4433717170

Lattice vectors:

A1 = ( -14.7806000000,    0.0000000000,    0.0000000000)

A2 = (    0.0000000000,    0.0000000000, -18.4257000000)

A3 = (    0.0000000000, -21.3339000000,    0.0000000000)

Analysis of symmetry for initial positions (statically):

---

Subroutine PRICEL returns:

Original cell was already a primitive cell.

Routine SETGRP: Setting up the symmetry group for a  
simple orthorhombic supercell.

Subroutine GETGRP returns: Found 1 space group operations  
(whereof 1 operations were pure point group operations)  
out of a pool of 8 trial point group operations.

The static configuration has the point symmetry  $C_1$ .

Analysis of symmetry for dynamics (positions and initial velocities):

---

Subroutine PRICEL returns:

Original cell was already a primitive cell.

Routine SETGRP: Setting up the symmetry group for a  
simple orthorhombic supercell.

Subroutine GETGRP returns: Found 1 space group operations  
(whereof 1 operations were pure point group operations)  
out of a pool of 8 trial point group operations.

The dynamic configuration has the point symmetry  $C_1$ .

Analysis of constrained symmetry for selective dynamics:

=====

Subroutine PRICEL returns:

Original cell was already a primitive cell.

Routine SETGRP: Setting up the symmetry group for a

simple orthorhombic supercell.

Subroutine GETGRP returns: Found 1 space group operations

(whereof 1 operations were pure point group operations)

out of a pool of 8 trial point group operations.

The constrained configuration has the point symmetry C<sub>1</sub>.

Analysis of structural, dynamic, and magnetic symmetry:

=====

Subroutine PRICEL returns:

Original cell was already a primitive cell.

Routine SETGRP: Setting up the symmetry group for a

simple orthorhombic supercell.

Subroutine GETGRP returns: Found 1 space group operations

(whereof 1 operations were pure point group operations)

out of a pool of 8 trial point group operations.

The magnetic configuration has the point symmetry  $C_1$ .

Subroutine INISYM returns: Found 1 space group operations

(whereof 1 operations are pure point group operations),

and found 1 'primitive' translations

KPOINTS: KPT-Resolved Value to Generate K-Mesh: 0

Automatic generation of k-mesh.

Space group operators:

| irotn | det(A)   | alpha    | n_x      | n_y      | n_z      | tau_x    | tau_y    | tau_z    |
|-------|----------|----------|----------|----------|----------|----------|----------|----------|
| 1     | 1.000000 | 0.000000 | 1.000000 | 0.000000 | 0.000000 | 0.000000 | 0.000000 | 0.000000 |

Subroutine IBZKPT returns following result:

=====

Found 1 irreducible k-points:

Following reciprocal coordinates:

| Coordinates |          |          | Weight   |
|-------------|----------|----------|----------|
| 0.000000    | 0.000000 | 0.000000 | 1.000000 |

Following cartesian coordinates:

| Coordinates |          |          | Weight   |
|-------------|----------|----------|----------|
| 0.000000    | 0.000000 | 0.000000 | 1.000000 |

WAVPRE: cpu time 0.1206: real time 0.1330

FEWALD: cpu time 0.0027: real time 0.0027

ORTHCH: cpu time 0.9982: real time 1.0013

LOOP+: cpu time 179.8284: real time 180.8808

----- Iteration 5( 1) -----

POTLOK: cpu time 0.1684: real time 0.1797

|           |          |          |           |         |
|-----------|----------|----------|-----------|---------|
| SETDIJ:   | cpu time | 0.0100:  | real time | 0.0101  |
| EDDIAG:   | cpu time | 1.9254:  | real time | 1.9317  |
| RMM-DIIS: | cpu time | 7.2725:  | real time | 7.3149  |
| ORTHCH:   | cpu time | 0.3556:  | real time | 0.3567  |
| DOS:      | cpu time | 0.0004:  | real time | 0.0004  |
| CHARGE:   | cpu time | 0.5267:  | real time | 0.5285  |
| MIXING:   | cpu time | 0.0043:  | real time | 0.0044  |
| -----     |          |          |           |         |
| LOOP:     | cpu time | 10.2634: | real time | 10.3265 |

eigenvalue-minimisations : 1956

total energy-change (2. order) :-0.6961632E-02 (-0.2175637E+00)

number of electron      518.9999729 magnetization      0.9999998

augmentation part      11.7333105 magnetization      0.0541906

Broyden mixing:

rms(total) = 0.58102E-01      rms(broyden)= 0.57904E-01

rms(prec ) = 0.60607E-01

weight for this iteration      100.00

Free energy of the ion-electron system (eV)

-----

alpha Z PSCENC = 233.50077011  
Ewald energy TEWEN = 91333.00078184  
-Hartree energy DENC = -107342.18780223  
-exchange EXHF = 0.00000000  
-V(xc)+E(xc) XCENC = 1743.79514203  
PAW double counting = 52183.16710294 -52246.09423871  
entropy T\*S EENTRO = -0.00000000  
eigenvalues EBANDS = -5812.27908553  
atomic energy EATOM = 18704.32991668  
Solvation Ediel\_sol = 0.00000000

-----

free energy TOTEN = -1202.76741286 eV

energy without entropy = -1202.76741286 energy(sigma->0) = -1202.76741286

-----

|           |          |          |           |         |
|-----------|----------|----------|-----------|---------|
| POTLOK:   | cpu time | 0.1715:  | real time | 0.1826  |
| SETDIJ:   | cpu time | 0.0102:  | real time | 0.0102  |
| EDDIAG:   | cpu time | 1.9271:  | real time | 1.9341  |
| RMM-DIIS: | cpu time | 7.0911:  | real time | 7.1172  |
| ORTHCH:   | cpu time | 0.3551:  | real time | 0.3562  |
| DOS:      | cpu time | 0.0004:  | real time | 0.0004  |
| CHARGE:   | cpu time | 0.5245:  | real time | 0.5261  |
| MIXING:   | cpu time | 0.0049:  | real time | 0.0049  |
| -----     |          |          |           |         |
| LOOP:     | cpu time | 10.0848: | real time | 10.1316 |

eigenvalue-minimisations : 1920

total energy-change (2. order) : 0.5270256E-02 (-0.2068401E-02)

number of electron      518.9999729 magnetization      0.9999998

augmentation part      11.7336497 magnetization      0.0541972

Broyden mixing:

rms(total) = 0.35720E-01      rms(broyden)= 0.35697E-01

rms(prec ) = 0.37267E-01

weight for this iteration      100.00

eigenvalues of (default mixing \* dielectric matrix)

average eigenvalue GAMMA= 2.2657

2.2657

Free energy of the ion-electron system (eV)

-----  
alpha Z PSCENC = 233.50077011

Ewald energy TEWEN = 91333.00078184

-Hartree energy DENC = -107341.12148652

-exchange EXHF = 0.00000000

-V(xc)+E(xc) XCENC = 1743.78433281

PAW double counting = 52176.80514563 -52239.72554719

entropy T\*S EENTRO = -0.00000000

eigenvalues EBANDS = -5813.33605597

atomic energy EATOM = 18704.32991668

Solvation Ediel\_sol = 0.00000000

-----  
free energy TOTEN = -1202.76214260 eV

energy without entropy = -1202.76214260 energy(sigma->0) = -1202.76214260

-----

----- Iteration 5( 3) -----

|           |          |         |           |        |
|-----------|----------|---------|-----------|--------|
| POTLOK:   | cpu time | 0.1658: | real time | 0.1907 |
| SETDIJ:   | cpu time | 0.0102: | real time | 0.0102 |
| EDDIAG:   | cpu time | 1.9245: | real time | 1.9315 |
| RMM-DIIS: | cpu time | 7.2338: | real time | 7.2568 |
| ORTHCH:   | cpu time | 0.3520: | real time | 0.3531 |
| DOS:      | cpu time | 0.0004: | real time | 0.0004 |
| CHARGE:   | cpu time | 0.5253: | real time | 0.5270 |
| MIXING:   | cpu time | 0.0051: | real time | 0.0051 |

-----

|       |          |          |           |         |
|-------|----------|----------|-----------|---------|
| LOOP: | cpu time | 10.2170: | real time | 10.2747 |
|-------|----------|----------|-----------|---------|

eigenvalue-minimisations : 1946

total energy-change (2. order) : 0.2164327E-02 (-0.6395618E-03)

|                    |             |               |           |
|--------------------|-------------|---------------|-----------|
| number of electron | 518.9999729 | magnetization | 0.9999998 |
| augmentation part  | 11.7341954  | magnetization | 0.0542518 |

Broyden mixing:

rms(total) = 0.89841E-02      rms(broyden)= 0.89739E-02

rms(prec ) = 0.98567E-02

weight for this iteration      100.00

eigenvalues of (default mixing \* dielectric matrix)

average eigenvalue GAMMA=    1.5968

1.0795   2.1140

Free energy of the ion-electron system (eV)

-----

alpha Z          PSCENC =          233.50077011

Ewald energy    TEWEN   =          91333.00078184

-Hartree energ DENC   =   -107339.50883606

-exchange       EXHF     =          0.00000000

-V(xc)+E(xc)    XCENC   =          1743.77807275

PAW double counting   =   52168.95584349   -52231.86807555

entropy T\*S     EENTRO =          -0.00000000

eigenvalues     EBANDS =          -5814.94845154

atomic energy EATOM = 18704.32991668

Solvation Ediel\_sol = 0.00000000

-----  
free energy TOTEN = -1202.75997828 eV

energy without entropy = -1202.75997828 energy(sigma->0) = -1202.75997828

----- Iteration 5( 4) -----

|           |          |         |           |        |
|-----------|----------|---------|-----------|--------|
| POTLOK:   | cpu time | 0.1659: | real time | 0.1842 |
| SETDIJ:   | cpu time | 0.0102: | real time | 0.0103 |
| EDDIAG:   | cpu time | 1.9265: | real time | 1.9328 |
| RMM-DIIS: | cpu time | 7.1611: | real time | 7.1818 |
| ORTHCH:   | cpu time | 0.3522: | real time | 0.3532 |
| DOS:      | cpu time | 0.0004: | real time | 0.0004 |

CHARGE: cpu time 0.5246: real time 0.5261

MIXING: cpu time 0.0052: real time 0.0053

-----

LOOP: cpu time 10.1461: real time 10.1940

eigenvalue-minimisations : 1927

total energy-change (2. order) : 0.1225504E-03 (-0.3856869E-04)

number of electron 518.9999729 magnetization 0.9999998

augmentation part 11.7335594 magnetization 0.0542400

Broyden mixing:

rms(total) = 0.49018E-02 rms(broyden)= 0.48991E-02

rms(prec ) = 0.52936E-02

weight for this iteration 100.00

eigenvalues of (default mixing \* dielectric matrix)

average eigenvalue GAMMA= 1.5160

2.1981 1.5724 0.7776

Free energy of the ion-electron system (eV)

-----

alpha Z PSCENC = 233.50077011

Ewald energy TEWEN = 91333.00078184

-Hartree energy DENC = -107339.43945424

-exchange EXHF = 0.00000000

-V(xc)+E(xc) XCENC = 1743.78025351

PAW double counting = 52169.89013286 -52232.80328641

entropy T\*S EENTRO = -0.00000000

eigenvalues EBANDS = -5815.01897009

atomic energy EATOM = 18704.32991668

Solvation Ediel\_sol = 0.00000000

-----

free energy TOTEN = -1202.75985573 eV

energy without entropy = -1202.75985573 energy(sigma->0) = -1202.75985573

-----

----- Iteration 5( 5) -----

|           |          |          |           |         |
|-----------|----------|----------|-----------|---------|
| POTLOK:   | cpu time | 0.1642:  | real time | 0.1648  |
| SETDIJ:   | cpu time | 0.0100:  | real time | 0.0100  |
| EDDIAG:   | cpu time | 1.9278:  | real time | 1.9336  |
| RMM-DIIS: | cpu time | 7.3516:  | real time | 7.3741  |
| ORTHCH:   | cpu time | 0.3543:  | real time | 0.3552  |
| DOS:      | cpu time | 0.0004:  | real time | 0.0004  |
| CHARGE:   | cpu time | 0.5254:  | real time | 0.5271  |
| MIXING:   | cpu time | 0.0055:  | real time | 0.0055  |
| -----     |          |          |           |         |
| LOOP:     | cpu time | 10.3391: | real time | 10.3707 |

eigenvalue-minimisations : 1953

total energy-change (2. order) :-0.4141794E-04 (-0.8578577E-05)

number of electron 518.9999729 magnetization 0.9999998

augmentation part 11.7336830 magnetization 0.0542410

Broyden mixing:

rms(total) = 0.20331E-02 rms(broyden)= 0.20325E-02

rms(prec ) = 0.24605E-02

weight for this iteration 100.00

eigenvalues of (default mixing \* dielectric matrix)

average eigenvalue GAMMA= 1.4703

2.4399 1.6513 0.9516 0.8384

Free energy of the ion-electron system (eV)

-----

alpha Z PSCENC = 233.50077011

Ewald energy TEWEN = 91333.00078184

-Hartree energ DENC = -107339.19070649

-exchange EXHF = 0.00000000

-V(xc)+E(xc) XCENC = 1743.77821329

PAW double counting = 52170.30798454 -52233.22030920

entropy T\*S EENTRO = -0.00000000

eigenvalues EBANDS = -5815.26654792

atomic energy EATOM = 18704.32991668

Solvation Ediel\_sol = 0.00000000

-----

free energy TOTEN = -1202.75989714 eV

energy without entropy = -1202.75989714 energy(sigma->0) = -1202.75989714

-----

----- Iteration 5( 6) -----

|           |          |         |           |        |
|-----------|----------|---------|-----------|--------|
| POTLOK:   | cpu time | 0.1658: | real time | 0.1845 |
| SETDIJ:   | cpu time | 0.0101: | real time | 0.0102 |
| EDDIAG:   | cpu time | 1.9276: | real time | 1.9340 |
| RMM-DIIS: | cpu time | 7.1404: | real time | 7.1668 |
| ORTHCH:   | cpu time | 0.3519: | real time | 0.3531 |
| DOS:      | cpu time | 0.0004: | real time | 0.0004 |
| CHARGE:   | cpu time | 0.5255: | real time | 0.5269 |
| MIXING:   | cpu time | 0.0058: | real time | 0.0058 |

-----

|       |          |          |           |         |
|-------|----------|----------|-----------|---------|
| LOOP: | cpu time | 10.1276: | real time | 10.1817 |
|-------|----------|----------|-----------|---------|

eigenvalue-minimisations : 1913

total energy-change (2. order) :-0.6337096E-04 (-0.1297635E-05)

number of electron 518.9999729 magnetization 0.9999998

augmentation part            11.7337157 magnetization            0.0542410

Broyden mixing:

rms(total) = 0.10116E-02      rms(broyden)= 0.10112E-02

rms(prec ) = 0.14010E-02

weight for this iteration      100.00

eigenvalues of (default mixing \* dielectric matrix)

average eigenvalue GAMMA=    1.4056

2.5080  1.8333  1.1508  0.8327  0.7031

Free energy of the ion-electron system (eV)

-----

alpha Z            PSCENC =            233.50077011

Ewald energy      TEWEN =            91333.00078184

-Hartree energ DENC =    -107338.98224196

-exchange        EXHF =            0.00000000

-V(xc)+E(xc)      XCENC =            1743.77732959

PAW double counting =    52170.85015434    -52233.76212387

entropy T\*S       EENTRO =            -0.00000000

eigenvalues       EBANDS =            -5815.47454725

atomic energy    EATOM =            18704.32991668

Solvation Ediel\_sol = 0.00000000

-----

free energy TOTEN = -1202.75996052 eV

energy without entropy = -1202.75996052 energy(sigma->0) = -1202.75996052

-----

----- Iteration 5( 7) -----

|           |          |         |           |        |
|-----------|----------|---------|-----------|--------|
| POTLOK:   | cpu time | 0.1731: | real time | 0.1768 |
| SETDIJ:   | cpu time | 0.0102: | real time | 0.0102 |
| EDDIAG:   | cpu time | 1.9378: | real time | 1.9434 |
| RMM-DIIS: | cpu time | 7.0011: | real time | 7.0435 |
| ORTHCH:   | cpu time | 0.3541: | real time | 0.3550 |
| DOS:      | cpu time | 0.0003: | real time | 0.0003 |
| CHARGE:   | cpu time | 0.5290: | real time | 0.5304 |

MIXING: cpu time 0.0056: real time 0.0056

-----

LOOP: cpu time 10.0113: real time 10.0651

eigenvalue-minimisations : 1877

total energy-change (2. order) :-0.7092879E-04 (-0.5514477E-06)

number of electron 518.9999729 magnetization 0.9999998

augmentation part 11.7337058 magnetization 0.0542426

Broyden mixing:

rms(total) = 0.59948E-03 rms(broyden)= 0.59934E-03

rms(prec ) = 0.94404E-03

weight for this iteration 100.00

eigenvalues of (default mixing \* dielectric matrix)

average eigenvalue GAMMA= 1.4507

2.7038 2.2060 1.3481 0.9189 0.9189 0.6085

Free energy of the ion-electron system (eV)

-----

alpha Z PSCENC = 233.50077011

Ewald energy TEWEN = 91333.00078184

-Hartree energ DENC = -107338.82846681

-exchange EXHF = 0.00000000

-V(xc)+E(xc) XCENC = 1743.77672448

PAW double counting = 52171.29917962 -52234.21101324

entropy T\*S EENTRO = -0.00000000

eigenvalues EBANDS = -5815.62792413

atomic energy EATOM = 18704.32991668

Solvation Ediel\_sol = 0.00000000

-----  
free energy TOTEN = -1202.76003144 eV

energy without entropy = -1202.76003144 energy(sigma->0) = -1202.76003144

----- Iteration 5( 8) -----

|           |          |         |           |        |
|-----------|----------|---------|-----------|--------|
| POTLOK:   | cpu time | 0.1644: | real time | 0.1660 |
| SETDIJ:   | cpu time | 0.0102: | real time | 0.0102 |
| EDDIAG:   | cpu time | 1.9233: | real time | 1.9296 |
| RMM-DIIS: | cpu time | 6.5759: | real time | 6.5966 |
| ORTHCH:   | cpu time | 0.3514: | real time | 0.3523 |
| DOS:      | cpu time | 0.0004: | real time | 0.0004 |
| CHARGE:   | cpu time | 0.5271: | real time | 0.5289 |
| MIXING:   | cpu time | 0.0056: | real time | 0.0056 |
| -----     |          |         |           |        |
| LOOP:     | cpu time | 9.5582: | real time | 9.5896 |

eigenvalue-minimisations : 1785

total energy-change (2. order) :-0.6803446E-04 (-0.4161448E-06)

number of electron 518.9999729 magnetization 0.9999998

augmentation part 11.7336893 magnetization 0.0542437

Broyden mixing:

rms(total) = 0.31218E-03 rms(broyden)= 0.31208E-03

rms(prec ) = 0.61397E-03

weight for this iteration 100.00

eigenvalues of (default mixing \* dielectric matrix)

average eigenvalue GAMMA= 1.4604

2.8270 2.3090 1.4734 1.0720 1.0720 0.8620 0.6078

Free energy of the ion-electron system (eV)

-----

alpha Z PSCENC = 233.50077011

Ewald energy TEWEN = 91333.00078184

-Hartree energy DENC = -107338.68231889

-exchange EXHF = 0.00000000

-V(xc)+E(xc) XCENC = 1743.77606381

PAW double counting = 52171.63545621 -52234.54716916

entropy T\*S EENTRO = -0.00000000

eigenvalues EBANDS = -5815.77360009

atomic energy EATOM = 18704.32991668

Solvation Ediel\_sol = 0.00000000

-----

free energy TOTEN = -1202.76009948 eV

energy without entropy = -1202.76009948 energy(sigma->0) = -1202.76009948

-----

----- Iteration 5( 9) -----

|           |          |         |           |        |
|-----------|----------|---------|-----------|--------|
| POTLOK:   | cpu time | 0.1652: | real time | 0.1781 |
| SETDIJ:   | cpu time | 0.0101: | real time | 0.0101 |
| EDDIAG:   | cpu time | 1.9317: | real time | 1.9381 |
| RMM-DIIS: | cpu time | 6.4455: | real time | 6.4764 |
| ORTHCH:   | cpu time | 0.3511: | real time | 0.3523 |
| DOS:      | cpu time | 0.0004: | real time | 0.0004 |
| CHARGE:   | cpu time | 0.5266: | real time | 0.5284 |
| MIXING:   | cpu time | 0.0064: | real time | 0.0065 |
| -----     |          |         |           |        |
| LOOP:     | cpu time | 9.4370: | real time | 9.4903 |

eigenvalue-minimisations : 1773

total energy-change (2. order) :-0.8120634E-04 (-0.5495803E-06)

number of electron 518.9999729 magnetization 0.9999998

augmentation part 11.7336694 magnetization 0.0542440

Broyden mixing:

rms(total) = 0.19541E-03      rms(broyden)= 0.19526E-03

rms(prec ) = 0.38205E-03

weight for this iteration      100.00

eigenvalues of (default mixing \* dielectric matrix)

average eigenvalue GAMMA=    1.5582

3.4083   2.5527   1.9778   1.1879   0.9949   0.9949   0.7336   0.6151

Free energy of the ion-electron system (eV)

-----

alpha Z      PSCENC =      233.50077011

Ewald energy    TEWEN =      91333.00078184

-Hartree energy DENC    =    -107338.52170678

-exchange      EXHF    =      0.00000000

-V(xc)+E(xc)    XCENC =      1743.77525533

PAW double counting    =    52171.79569983    -52234.70730989

entropy T\*S      EENTRO =      -0.00000000

eigenvalues      EBANDS =      -5815.93358781

atomic energy    EATOM =      18704.32991668

Solvation    Ediel\_sol =      0.00000000

-----  
free energy    TOTEN    =    -1202.76018069 eV

energy without entropy =    -1202.76018069    energy(sigma->0) =    -1202.76018069

----- Iteration    5( 10) -----

|           |          |         |           |        |
|-----------|----------|---------|-----------|--------|
| POTLOK:   | cpu time | 0.1646: | real time | 0.1811 |
| SETDIJ:   | cpu time | 0.0100: | real time | 0.0100 |
| EDDIAG:   | cpu time | 1.9286: | real time | 1.9353 |
| RMM-DIIS: | cpu time | 6.3194: | real time | 6.3418 |
| ORTHCH:   | cpu time | 0.3514: | real time | 0.3522 |
| DOS:      | cpu time | 0.0004: | real time | 0.0003 |
| CHARGE:   | cpu time | 0.5282: | real time | 0.5298 |
| MIXING:   | cpu time | 0.0068: | real time | 0.0067 |

-----  
LOOP:  cpu time    9.3094: real time    9.3574

eigenvalue-minimisations : 1738

total energy-change (2. order) :-0.6628858E-04  (-0.5378547E-06)

number of electron    518.9999729 magnetization        0.9999998

augmentation part    11.7336630 magnetization        0.0542448

Broyden mixing:

rms(total) = 0.12594E-03    rms(broyden)= 0.12579E-03

rms(prec ) = 0.21315E-03

weight for this iteration    100.00

eigenvalues of (default mixing \* dielectric matrix)

average eigenvalue GAMMA=    1.6241

4.2817  2.5662  2.1288  1.2412  1.2412  0.9212  0.9212  0.6977  0.6177

Free energy of the ion-electron system (eV)

-----  
alpha Z           PSCENC =        233.50077011

Ewald energy    TEWEN  =        91333.00078184

-Hartree energ DENC  =   -107338.38130320

-exchange EXHF = 0.00000000  
-V(xc)+E(xc) XCENC = 1743.77453694  
PAW double counting = 52171.84807916 -52234.75960404  
entropy T\*S EENTRO = -0.00000000  
eigenvalues EBANDS = -5816.07342447  
atomic energy EATOM = 18704.32991668  
Solvation Ediel\_sol = 0.00000000

-----  
free energy TOTEN = -1202.76024697 eV

energy without entropy = -1202.76024697 energy(sigma->0) = -1202.76024697

----- Iteration 5( 11) -----

POTLOK: cpu time 0.1668: real time 0.1841

|           |          |         |           |        |
|-----------|----------|---------|-----------|--------|
| SETDIJ:   | cpu time | 0.0101: | real time | 0.0101 |
| EDDIAG:   | cpu time | 1.9277: | real time | 1.9345 |
| RMM-DIIS: | cpu time | 6.0769: | real time | 6.1047 |
| ORTHCH:   | cpu time | 0.3510: | real time | 0.3521 |
| DOS:      | cpu time | 0.0004: | real time | 0.0004 |
| CHARGE:   | cpu time | 0.5267: | real time | 0.5285 |
| MIXING:   | cpu time | 0.0070: | real time | 0.0070 |
| -----     |          |         |           |        |
| LOOP:     | cpu time | 9.0664: | real time | 9.1212 |

eigenvalue-minimisations : 1657

total energy-change (2. order) :-0.2986547E-04 (-0.1735327E-06)

number of electron 518.9999729 magnetization 0.9999998

augmentation part 11.7336630 magnetization 0.0542449

Broyden mixing:

rms(total) = 0.80347E-04 rms(broyden)= 0.80281E-04

rms(prec ) = 0.13536E-03

weight for this iteration 100.00

eigenvalues of (default mixing \* dielectric matrix)

average eigenvalue GAMMA= 1.7729

5.5502 2.6565 2.2482 1.9149 1.1336 1.1336 0.9032 0.9032 0.6221 0.6631

Free energy of the ion-electron system (eV)

-----

alpha Z PSCENC = 233.50077011

Ewald energy TEWEN = 91333.00078184

-Hartree energy DENC = -107338.32254338

-exchange EXHF = 0.00000000

-V(xc)+E(xc) XCENC = 1743.77427601

PAW double counting = 52171.81632837 -52234.72783662

entropy T\*S EENTRO = -0.00000000

eigenvalues EBANDS = -5816.13196985

atomic energy EATOM = 18704.32991668

Solvation Ediel\_sol = 0.00000000

-----

free energy TOTEN = -1202.76027684 eV

energy without entropy = -1202.76027684 energy(sigma->0) = -1202.76027684

-----

----- Iteration 5( 12) -----

POTLOK: cpu time 0.1648: real time 0.1669  
SETDIJ: cpu time 0.0100: real time 0.0100  
EDDIAG: cpu time 1.9252: real time 1.9320  
RMM-DIIS: cpu time 5.9365: real time 5.9613  
ORTHCH: cpu time 0.3523: real time 0.3535  
DOS: cpu time 0.0004: real time 0.0004  
CHARGE: cpu time 0.5276: real time 0.5295  
MIXING: cpu time 0.0074: real time 0.0075

-----

LOOP: cpu time 8.9243: real time 8.9610

eigenvalue-minimisations : 1614

total energy-change (2. order) :-0.2038423E-04 (-0.9111422E-07)

number of electron 518.9999729 magnetization 0.9999998

augmentation part 11.7336581 magnetization 0.0542449

Broyden mixing:

rms(total) = 0.43614E-04      rms(broyden)= 0.43575E-04

rms(prec ) = 0.77171E-04

weight for this iteration      100.00

eigenvalues of (default mixing \* dielectric matrix)

average eigenvalue GAMMA=    1.8098

6.2479   2.7548   2.4148   1.9967   1.2461   1.2461   0.9576   0.9576   0.8090   0.6238

0.6529

Free energy of the ion-electron system (eV)

-----

alpha Z          PSCENC =          233.50077011

Ewald energy    TEWEN =          91333.00078184

-Hartree energy DENC =   -107338.28880503

-exchange       EXHF =            0.00000000

-V(xc)+E(xc)    XCENC =          1743.77419275

PAW double counting =    52171.77034573   -52234.68186976

entropy T\*S     EENTRO =          -0.00000000

eigenvalues     EBANDS =       -5816.16562955

atomic energy   EATOM =        18704.32991668

Solvation    Ediel\_sol =          0.00000000

-----  
free energy    TOTEN    =    -1202.76029722 eV

energy without entropy =    -1202.76029722    energy(sigma->0) =    -1202.76029722

----- Iteration    5( 13) -----

|           |          |         |           |        |
|-----------|----------|---------|-----------|--------|
| POTLOK:   | cpu time | 0.1683: | real time | 0.1703 |
| SETDIJ:   | cpu time | 0.0101: | real time | 0.0101 |
| EDDIAG:   | cpu time | 1.9216: | real time | 1.9281 |
| RMM-DIIS: | cpu time | 5.5372: | real time | 5.5534 |
| ORTHCH:   | cpu time | 0.3528: | real time | 0.3537 |
| DOS:      | cpu time | 0.0004: | real time | 0.0004 |
| CHARGE:   | cpu time | 0.5280: | real time | 0.5298 |
| MIXING:   | cpu time | 0.0078: | real time | 0.0078 |

-----  
LOOP:  cpu time    8.5261: real time    8.5536

eigenvalue-minimisations : 1495

total energy-change (2. order) :-0.9471638E-05  (-0.2989513E-07)

number of electron    518.9999729 magnetization    0.9999998

augmentation part    11.7336588 magnetization    0.0542449

Broyden mixing:

rms(total) = 0.29171E-04    rms(broyden)= 0.29163E-04

rms(prec ) = 0.49484E-04

weight for this iteration    100.00

eigenvalues of (default mixing \* dielectric matrix)

average eigenvalue GAMMA=    1.8549

6.7288  2.9375  2.6649  1.9830  1.8072  1.1424  1.1424  0.9254  0.9254  0.7324

0.6256  0.6433

Free energy of the ion-electron system (eV)

-----  
alpha Z           PSCENC =           233.50077011

Ewald energy    TEWEN =           91333.00078184

-Hartree energ DENC = -107338.27672075

-exchange EXHF = 0.00000000

-V(xc)+E(xc) XCENC = 1743.77416621

PAW double counting = 52171.76334561 -52234.67486727

entropy T\*S EENTRO = -0.00000000

eigenvalues EBANDS = -5816.17769914

atomic energy EATOM = 18704.32991668

Solvation Ediel\_sol = 0.00000000

-----  
free energy TOTEN = -1202.76030670 eV

energy without entropy = -1202.76030670 energy(sigma->0) = -1202.76030670

----- Iteration 5( 14) -----

|           |          |         |           |        |
|-----------|----------|---------|-----------|--------|
| POTLOK:   | cpu time | 0.1672: | real time | 0.1862 |
| SETDIJ:   | cpu time | 0.0101: | real time | 0.0101 |
| EDDIAG:   | cpu time | 1.9264: | real time | 1.9322 |
| RMM-DIIS: | cpu time | 5.2624: | real time | 5.3364 |
| ORTHCH:   | cpu time | 0.3508: | real time | 0.3518 |
| DOS:      | cpu time | 0.0004: | real time | 0.0004 |
| CHARGE:   | cpu time | 0.5271: | real time | 0.5287 |
| MIXING:   | cpu time | 0.0080: | real time | 0.0080 |
| -----     |          |         |           |        |
| LOOP:     | cpu time | 8.2523: | real time | 8.3539 |

eigenvalue-minimisations : 1449

total energy-change (2. order) :-0.5957125E-05 (-0.1714253E-07)

number of electron 518.9999729 magnetization 0.9999998

augmentation part 11.7336581 magnetization 0.0542449

Broyden mixing:

rms(total) = 0.18140E-04 rms(broyden)= 0.18132E-04

rms(prec ) = 0.29320E-04

weight for this iteration 100.00

eigenvalues of (default mixing \* dielectric matrix)

average eigenvalue GAMMA= 1.9301

7.1739 3.8343 2.6631 2.3105 1.8488 1.2480 1.2480 0.9825 0.9825 0.8438  
0.6946 0.6310 0.6310

Free energy of the ion-electron system (eV)

-----

alpha Z PSCENC = 233.50077011

Ewald energy TEWEN = 91333.00078184

-Hartree energ DENC = -107338.27083600

-exchange EXHF = 0.00000000

-V(xc)+E(xc) XCENC = 1743.77416503

PAW double counting = 52171.77280933 -52234.68432980

entropy T\*S EENTRO = -0.00000000

eigenvalues EBANDS = -5816.18358985

atomic energy EATOM = 18704.32991668

Solvation Ediel\_sol = 0.00000000

-----

free energy TOTEN = -1202.76031265 eV

energy without entropy = -1202.76031265 energy(sigma->0) = -1202.76031265

-----

----- Iteration 5( 15) -----

|           |          |         |           |        |
|-----------|----------|---------|-----------|--------|
| POTLOK:   | cpu time | 0.1664: | real time | 0.1789 |
| SETDIJ:   | cpu time | 0.0101: | real time | 0.0101 |
| EDDIAG:   | cpu time | 1.9256: | real time | 1.9322 |
| RMM-DIIS: | cpu time | 4.9807: | real time | 5.0043 |
| ORTHCH:   | cpu time | 0.3524: | real time | 0.3533 |
| DOS:      | cpu time | 0.0004: | real time | 0.0004 |
| CHARGE:   | cpu time | 0.5275: | real time | 0.5290 |
| MIXING:   | cpu time | 0.0087: | real time | 0.0088 |

-----

|       |          |         |           |        |
|-------|----------|---------|-----------|--------|
| LOOP: | cpu time | 7.9718: | real time | 8.0170 |
|-------|----------|---------|-----------|--------|

eigenvalue-minimisations : 1378

total energy-change (2. order) :-0.2751207E-05 (-0.6660790E-08)

number of electron 518.9999729 magnetization 0.9999998

augmentation part            11.7336576 magnetization            0.0542448

Broyden mixing:

rms(total) = 0.10555E-04      rms(broyden)= 0.10548E-04

rms(prec ) = 0.16934E-04

weight for this iteration      100.00

eigenvalues of (default mixing \* dielectric matrix)

average eigenvalue GAMMA=    1.9682

7.6829  4.4920  2.5896  2.5177  1.8771  1.5030  1.1239  1.1239  0.9618  0.9618

0.7922  0.6743  0.6277  0.6277

Free energy of the ion-electron system (eV)

-----

alpha Z            PSCENC =            233.50077011

Ewald energy      TEWEN =            91333.00078184

-Hartree energ DENC =    -107338.26822594

-exchange          EXHF =              0.00000000

-V(xc)+E(xc)      XCENC =            1743.77416491

PAW double counting =    52171.78264361    -52234.69416397

entropy T\*S        EENTRO =            -0.00000000

eigenvalues        EBANDS =            -5816.18620266

atomic energy EATOM = 18704.32991668

Solvation Ediel\_sol = 0.00000000

-----  
free energy TOTEN = -1202.76031540 eV

energy without entropy = -1202.76031540 energy(sigma->0) = -1202.76031540

----- Iteration 5( 16) -----

|           |          |         |           |        |
|-----------|----------|---------|-----------|--------|
| POTLOK:   | cpu time | 0.1680: | real time | 0.1805 |
| SETDIJ:   | cpu time | 0.0100: | real time | 0.0100 |
| EDDIAG:   | cpu time | 1.9244: | real time | 1.9308 |
| RMM-DIIS: | cpu time | 4.7641: | real time | 4.7823 |
| ORTHCH:   | cpu time | 0.3514: | real time | 0.3524 |
| DOS:      | cpu time | 0.0004: | real time | 0.0004 |

CHARGE: cpu time 0.5274: real time 0.5290

MIXING: cpu time 0.0092: real time 0.0092

-----

LOOP: cpu time 7.7549: real time 7.7946

eigenvalue-minimisations : 1283

total energy-change (2. order) :-0.1252163E-05 (-0.1880261E-08)

number of electron 518.9999729 magnetization 0.9999998

augmentation part 11.7336580 magnetization 0.0542448

Broyden mixing:

rms(total) = 0.60868E-05 rms(broyden)= 0.60822E-05

rms(prec ) = 0.10769E-04

weight for this iteration 100.00

eigenvalues of (default mixing \* dielectric matrix)

average eigenvalue GAMMA= 1.9720

7.9355 4.8104 2.6620 2.5485 2.0323 1.5440 1.2307 1.2307 0.9858 0.9858

0.9317 0.7640 0.6679 0.6256 0.6256

Free energy of the ion-electron system (eV)

-----

alpha Z        PSCENC =        233.50077011  
Ewald energy    TEWEN =        91333.00078184  
-Hartree energ DENC =    -107338.26732957  
-exchange       EXHF =        0.00000000  
-V(xc)+E(xc)   XCENC =        1743.77416300  
PAW double counting =    52171.78616762    -52234.69768715  
entropy T\*S     EENTRO =        -0.00000000  
eigenvalues     EBANDS =        -5816.18709919  
atomic energy   EATOM =        18704.32991668  
Solvation    Ediel\_sol =        0.00000000

-----

free energy     TOTEN =        -1202.76031666 eV

energy without entropy =    -1202.76031666    energy(sigma->0) =    -1202.76031666

-----

|           |          |         |           |        |
|-----------|----------|---------|-----------|--------|
| POTLOK:   | cpu time | 0.1725: | real time | 0.1730 |
| SETDIJ:   | cpu time | 0.0101: | real time | 0.0102 |
| EDDIAG:   | cpu time | 1.9282: | real time | 1.9335 |
| RMM-DIIS: | cpu time | 4.7358: | real time | 4.7588 |
| ORTHCH:   | cpu time | 0.3522: | real time | 0.3531 |
| DOS:      | cpu time | 0.0004: | real time | 0.0004 |
| CHARGE:   | cpu time | 0.5276: | real time | 0.5291 |
| MIXING:   | cpu time | 0.0094: | real time | 0.0094 |
| -----     |          |         |           |        |
| LOOP:     | cpu time | 7.7362: | real time | 7.7675 |

eigenvalue-minimisations : 1280

total energy-change (2. order) :-0.1180255E-05 (-0.9748833E-09)

number of electron 518.9999729 magnetization 0.9999998

augmentation part 11.7336579 magnetization 0.0542448

Broyden mixing:

rms(total) = 0.42278E-05 rms(broyden)= 0.42256E-05

rms(prec ) = 0.68691E-05

weight for this iteration 100.00

eigenvalues of (default mixing \* dielectric matrix)

average eigenvalue GAMMA= 1.9992

8.1497 5.1564 2.9213 2.5432 2.2380 1.7642 1.5362 1.1325 1.1325 0.9702

0.9702 0.8391 0.7223 0.6633 0.6243 0.6243

Free energy of the ion-electron system (eV)

-----  
alpha Z PSCENC = 233.50077011

Ewald energy TEWEN = 91333.00078184

-Hartree energ DENC = -107338.26682937

-exchange EXHF = 0.00000000

-V(xc)+E(xc) XCENC = 1743.77417064

PAW double counting = 52171.78593159 -52234.69745218

entropy T\*S EENTRO = -0.00000000

eigenvalues EBANDS = -5816.18760714

atomic energy EATOM = 18704.32991668

Solvation Ediel\_sol = 0.00000000

-----  
free energy TOTEN = -1202.76031784 eV

energy without entropy = -1202.76031784 energy(sigma->0) = -1202.76031784

-----

----- Iteration 5( 18) -----

|           |          |         |           |        |
|-----------|----------|---------|-----------|--------|
| POTLOK:   | cpu time | 0.1667: | real time | 0.1835 |
| SETDIJ:   | cpu time | 0.0101: | real time | 0.0101 |
| EDDIAG:   | cpu time | 1.9246: | real time | 1.9310 |
| RMM-DIIS: | cpu time | 4.7563: | real time | 4.7732 |
| ORTHCH:   | cpu time | 0.3535: | real time | 0.3545 |
| DOS:      | cpu time | 0.0004: | real time | 0.0004 |
| CHARGE:   | cpu time | 0.5275: | real time | 0.5292 |
| MIXING:   | cpu time | 0.0102: | real time | 0.0102 |
| -----     |          |         |           |        |
| LOOP:     | cpu time | 7.7493: | real time | 7.7921 |

total energy-change (2. order) :-0.1013832E-05 (-0.5644667E-09)

number of electron      518.9999729 magnetization      0.9999998

augmentation part      11.7336577 magnetization      0.0542448

Broyden mixing:

rms(total) = 0.25572E-05      rms(broyden)= 0.25561E-05

rms(prec ) = 0.39363E-05

weight for this iteration      100.00

eigenvalues of (default mixing \* dielectric matrix)

average eigenvalue GAMMA=      2.0421

8.4456   5.5119   3.5764   2.5549   2.4657   1.9781   1.4710   1.2010   1.2010   0.9867

0.9867   0.9665   0.7846   0.6887   0.6494   0.6224   0.6253

Free energy of the ion-electron system (eV)

-----

alpha Z      PSCENC =      233.50077011

Ewald energy      TEWEN =      91333.00078184

-Hartree energ      DENC =      -107338.26656626

-exchange      EXHF =      0.00000000

-V(xc)+E(xc)      XCENC =      1743.77417820

PAW double counting      =      52171.78435804      -52234.69587989

entropy T\*S    EENTRO =        -0.00000000

eigenvalues    EBANDS =        -5816.18787758

atomic energy  EATOM  =        18704.32991668

Solvation    Ediel\_sol  =        0.00000000

-----  
free energy    TOTEN  =        -1202.76031885 eV

energy without entropy =    -1202.76031885    energy(sigma->0) =    -1202.76031885

-----  
----- Iteration        5( 19) -----

POTLOK:    cpu time    0.1684: real time    0.1817

SETDIJ:    cpu time    0.0101: real time    0.0101

EDDIAG:    cpu time    1.9277: real time    1.9344

RMM-DIIS:    cpu time    4.3655: real time    4.3794

ORTHCH: cpu time 0.3508: real time 0.3519

DOS: cpu time 0.0004: real time 0.0004

CHARGE: cpu time 0.5268: real time 0.5285

MIXING: cpu time 0.0101: real time 0.0101

-----

LOOP: cpu time 7.3599: real time 7.3964

eigenvalue-minimisations : 1096

total energy-change (2. order) :-0.2101879E-06 (-0.1725633E-09)

number of electron 518.9999729 magnetization 0.9999998

augmentation part 11.7336578 magnetization 0.0542448

Broyden mixing:

rms(total) = 0.14886E-05 rms(broyden)= 0.14880E-05

rms(prec ) = 0.24400E-05

weight for this iteration 100.00

eigenvalues of (default mixing \* dielectric matrix)

average eigenvalue GAMMA= 2.0536

8.5261 5.9064 3.8680 2.5468 2.5468 1.9458 1.5620 1.4105 1.1429 1.1429

1.1412 0.9348 0.9348 0.7827 0.6832 0.6389 0.6211 0.6287

Free energy of the ion-electron system (eV)

-----

alpha Z        PSCENC =        233.50077011

Ewald energy    TEWEN =        91333.00078184

-Hartree energy DENC =    -107338.26643855

-exchange       EXHF =            0.00000000

-V(xc)+E(xc)    XCENC =        1743.77417947

PAW double counting =    52171.78339280    -52234.69491455

entropy T\*S     EENTRO =        -0.00000000

eigenvalues     EBANDS =        -5816.18800687

atomic energy   EATOM =        18704.32991668

Solvation    Ediel\_sol =        0.00000000

-----

free energy     TOTEN =        -1202.76031906 eV

energy without entropy =    -1202.76031906    energy(sigma->0) =    -1202.76031906

-----

----- Iteration 5( 20) -----

POTLOK: cpu time 0.1653: real time 0.1657  
SETDIJ: cpu time 0.0101: real time 0.0101  
EDDIAG: cpu time 1.9268: real time 1.9329  
RMM-DIIS: cpu time 4.1620: real time 4.1738  
ORTHCH: cpu time 0.3504: real time 0.3515  
DOS: cpu time 0.0003: real time 0.0003

-----

LOOP: cpu time 6.6148: real time 6.6343

eigenvalue-minimisations : 973

total energy-change (2. order) :-0.6263872E-07 (-0.7295142E-10)

number of electron 518.9999729 magnetization 0.9999998

augmentation part 11.7336578 magnetization 0.0542448

Free energy of the ion-electron system (eV)

-----

alpha Z PSCENC = 233.50077011

Ewald energy TEWEN = 91333.00078184

-Hartree energ DENC = -107338.26631824

-exchange EXHF = 0.00000000

-V(xc)+E(xc) XCENC = 1743.77417752

PAW double counting = 52171.78311498 -52234.69463584

entropy T\*S EENTRO = -0.00000000

eigenvalues EBANDS = -5816.18812617

atomic energy EATOM = 18704.32991668

Solvation Ediel\_sol = 0.00000000

-----  
free energy TOTEN = -1202.76031912 eV

energy without entropy = -1202.76031912 energy(sigma->0) = -1202.76031912

-----  
average (electrostatic) potential at core

the test charge radii are 0.5201 0.6991 1.0621 0.7215

(the norm of the test charge is 1.0000)

|              |              |              |              |              |
|--------------|--------------|--------------|--------------|--------------|
| 1 -40.7566   | 2 -40.7547   | 3 -40.7559   | 4 -40.7547   | 5 -40.7566   |
| 6 -40.7588   | 7 -40.7562   | 8 -40.7639   | 9 -40.7558   | 10 -40.7634  |
| 11 -40.7573  | 12 -40.7593  | 13 -40.6570  | 14 -40.7008  | 15 -40.7759  |
| 16 -40.7031  | 17 -40.6964  | 18 -40.8605  | 19 -40.6833  | 20 -40.6735  |
| 21 -40.6929  | 22 -40.6652  | 23 -40.0792  | 24 -40.1206  | 25 -57.4631  |
| 26 -57.6745  | 27 -57.6611  | 28 -57.4732  | 29 -57.6688  | 30 -57.4631  |
| 31 -57.6743  | 32 -57.6607  | 33 -57.4712  | 34 -57.6736  | 35 -57.4639  |
| 36 -57.6761  | 37 -57.6607  | 38 -57.4733  | 39 -57.6793  | 40 -57.4629  |
| 41 -57.6801  | 42 -57.6609  | 43 -57.4781  | 44 -57.6938  | 45 -57.4629  |
| 46 -57.6791  | 47 -57.6617  | 48 -57.4784  | 49 -57.6850  | 50 -57.4641  |
| 51 -57.6758  | 52 -57.6614  | 53 -57.4761  | 54 -57.6715  | 55 -57.6411  |
| 56 -57.6674  | 57 -57.6922  | 58 -57.6895  | 59 -57.6711  | 60 -57.6737  |
| 61 -57.6960  | 62 -57.6812  | 63 -57.6414  | 64 -57.6668  | 65 -57.6943  |
| 66 -57.7006  | 67 -57.6694  | 68 -57.6735  | 69 -57.6997  | 70 -57.7074  |
| 71 -57.6409  | 72 -57.6682  | 73 -57.7019  | 74 -57.7272  | 75 -57.6702  |
| 76 -57.6741  | 77 -57.7117  | 78 -57.7575  | 79 -57.6410  | 80 -57.6708  |
| 81 -57.7155  | 82 -57.7575  | 83 -57.6735  | 84 -57.6756  | 85 -57.7429  |
| 86 -57.8472  | 87 -57.6435  | 88 -57.6715  | 89 -57.7174  | 90 -57.7227  |
| 91 -57.6782  | 92 -57.6758  | 93 -57.7476  | 94 -57.7661  | 95 -57.6418  |
| 96 -57.6697  | 97 -57.7013  | 98 -57.6966  | 99 -57.6755  | 100 -57.6746 |
| 101 -57.7136 | 102 -57.6923 | 103 -57.6651 | 104 -57.6361 | 105 -57.6523 |
| 106 -57.2987 | 107 -57.3934 | 108 -57.6361 | 109 -57.6052 | 110 -57.6640 |

|              |              |              |              |              |
|--------------|--------------|--------------|--------------|--------------|
| 111 -57.6360 | 112 -57.6488 | 113 -57.3181 | 114 -57.3992 | 115 -57.6353 |
| 116 -57.6070 | 117 -57.6632 | 118 -57.6275 | 119 -57.7045 | 120 -57.6936 |
| 121 -57.3927 | 122 -57.6340 | 123 -57.7166 | 124 -57.6641 | 125 -57.6302 |
| 126 -57.8388 | 127 -58.3243 | 128 -57.3657 | 129 -57.6393 | 130 -58.1521 |
| 131 -57.6721 | 132 -57.6396 | 133 -57.8066 | 134 -57.4268 | 135 -57.3772 |
| 136 -57.6432 | 137 -58.0883 | 138 -57.6686 | 139 -57.6354 | 140 -57.6778 |
| 141 -57.3086 | 142 -57.3833 | 143 -57.6387 | 144 -57.6551 | 145 -60.7792 |
| 146 -57.3103 | 147 -81.1350 |              |              |              |

E-fermi : -2.3506      XC(G=0): -2.7341      alpha+bet : -2.2521

spin component 1

k-point 1 : 0.0000 0.0000 0.0000

| band No. | band energies | occupation |
|----------|---------------|------------|
| 1        | -26.7220      | 1.00000    |
| 2        | -21.5748      | 1.00000    |
| 3        | -21.4767      | 1.00000    |
| 4        | -21.1085      | 1.00000    |

|    |          |         |
|----|----------|---------|
| 5  | -21.0742 | 1.00000 |
| 6  | -21.0214 | 1.00000 |
| 7  | -20.9837 | 1.00000 |
| 8  | -20.9818 | 1.00000 |
| 9  | -20.8965 | 1.00000 |
| 10 | -20.5683 | 1.00000 |
| 11 | -20.5091 | 1.00000 |
| 12 | -20.4172 | 1.00000 |
| 13 | -20.4031 | 1.00000 |
| 14 | -20.1370 | 1.00000 |
| 15 | -19.9816 | 1.00000 |
| 16 | -19.7166 | 1.00000 |
| 17 | -19.6334 | 1.00000 |
| 18 | -19.6052 | 1.00000 |
| 19 | -19.5896 | 1.00000 |
| 20 | -19.5336 | 1.00000 |
| 21 | -19.5319 | 1.00000 |
| 22 | -19.5041 | 1.00000 |
| 23 | -19.4862 | 1.00000 |
| 24 | -19.1239 | 1.00000 |
| 25 | -19.0813 | 1.00000 |
| 26 | -18.9849 | 1.00000 |

|    |          |         |
|----|----------|---------|
| 27 | -18.9699 | 1.00000 |
| 28 | -18.9091 | 1.00000 |
| 29 | -18.7391 | 1.00000 |
| 30 | -18.5171 | 1.00000 |
| 31 | -18.3650 | 1.00000 |
| 32 | -18.2808 | 1.00000 |
| 33 | -18.2573 | 1.00000 |
| 34 | -18.1898 | 1.00000 |
| 35 | -18.1877 | 1.00000 |
| 36 | -18.0851 | 1.00000 |
| 37 | -18.0811 | 1.00000 |
| 38 | -17.5766 | 1.00000 |
| 39 | -17.3193 | 1.00000 |
| 40 | -17.2937 | 1.00000 |
| 41 | -17.2882 | 1.00000 |
| 42 | -17.2157 | 1.00000 |
| 43 | -17.2085 | 1.00000 |
| 44 | -17.1856 | 1.00000 |
| 45 | -17.0290 | 1.00000 |
| 46 | -16.9558 | 1.00000 |
| 47 | -16.9381 | 1.00000 |
| 48 | -16.8984 | 1.00000 |

|    |          |         |
|----|----------|---------|
| 49 | -16.8965 | 1.00000 |
| 50 | -16.8552 | 1.00000 |
| 51 | -16.8468 | 1.00000 |
| 52 | -16.8275 | 1.00000 |
| 53 | -16.8244 | 1.00000 |
| 54 | -16.7343 | 1.00000 |
| 55 | -16.7313 | 1.00000 |
| 56 | -16.1949 | 1.00000 |
| 57 | -15.7348 | 1.00000 |
| 58 | -15.6974 | 1.00000 |
| 59 | -15.6659 | 1.00000 |
| 60 | -15.6432 | 1.00000 |
| 61 | -15.6210 | 1.00000 |
| 62 | -15.5587 | 1.00000 |
| 63 | -15.5547 | 1.00000 |
| 64 | -15.1825 | 1.00000 |
| 65 | -14.8155 | 1.00000 |
| 66 | -14.6156 | 1.00000 |
| 67 | -14.5828 | 1.00000 |
| 68 | -14.5397 | 1.00000 |
| 69 | -14.5034 | 1.00000 |
| 70 | -14.4735 | 1.00000 |

|    |          |         |
|----|----------|---------|
| 71 | -14.4485 | 1.00000 |
| 72 | -14.3395 | 1.00000 |
| 73 | -14.3109 | 1.00000 |
| 74 | -14.2847 | 1.00000 |
| 75 | -14.2774 | 1.00000 |
| 76 | -14.1872 | 1.00000 |
| 77 | -14.1834 | 1.00000 |
| 78 | -13.8940 | 1.00000 |
| 79 | -13.7670 | 1.00000 |
| 80 | -13.5996 | 1.00000 |
| 81 | -13.5535 | 1.00000 |
| 82 | -13.5346 | 1.00000 |
| 83 | -13.5035 | 1.00000 |
| 84 | -13.4525 | 1.00000 |
| 85 | -13.3689 | 1.00000 |
| 86 | -13.3505 | 1.00000 |
| 87 | -13.1945 | 1.00000 |
| 88 | -12.7920 | 1.00000 |
| 89 | -12.7651 | 1.00000 |
| 90 | -12.7326 | 1.00000 |
| 91 | -12.7010 | 1.00000 |
| 92 | -12.6916 | 1.00000 |

|     |          |         |
|-----|----------|---------|
| 93  | -12.6293 | 1.00000 |
| 94  | -12.4659 | 1.00000 |
| 95  | -12.4510 | 1.00000 |
| 96  | -12.3873 | 1.00000 |
| 97  | -12.3297 | 1.00000 |
| 98  | -12.2178 | 1.00000 |
| 99  | -12.2082 | 1.00000 |
| 100 | -12.1704 | 1.00000 |
| 101 | -11.9447 | 1.00000 |
| 102 | -11.6905 | 1.00000 |
| 103 | -11.6295 | 1.00000 |
| 104 | -11.6160 | 1.00000 |
| 105 | -11.5641 | 1.00000 |
| 106 | -11.0915 | 1.00000 |
| 107 | -11.0364 | 1.00000 |
| 108 | -10.9019 | 1.00000 |
| 109 | -10.8920 | 1.00000 |
| 110 | -10.8346 | 1.00000 |
| 111 | -10.7157 | 1.00000 |
| 112 | -10.6811 | 1.00000 |
| 113 | -10.6654 | 1.00000 |
| 114 | -10.6518 | 1.00000 |

|     |          |         |
|-----|----------|---------|
| 115 | -10.5941 | 1.00000 |
| 116 | -10.5855 | 1.00000 |
| 117 | -10.5774 | 1.00000 |
| 118 | -10.5734 | 1.00000 |
| 119 | -10.5310 | 1.00000 |
| 120 | -10.5302 | 1.00000 |
| 121 | -10.5153 | 1.00000 |
| 122 | -10.5076 | 1.00000 |
| 123 | -10.3833 | 1.00000 |
| 124 | -10.2952 | 1.00000 |
| 125 | -10.2608 | 1.00000 |
| 126 | -10.1922 | 1.00000 |
| 127 | -10.1911 | 1.00000 |
| 128 | -10.0256 | 1.00000 |
| 129 | -9.9708  | 1.00000 |
| 130 | -9.8886  | 1.00000 |
| 131 | -9.8567  | 1.00000 |
| 132 | -9.7959  | 1.00000 |
| 133 | -9.7907  | 1.00000 |
| 134 | -9.7408  | 1.00000 |
| 135 | -9.6726  | 1.00000 |
| 136 | -9.4473  | 1.00000 |

|     |         |         |
|-----|---------|---------|
| 137 | -9.4274 | 1.00000 |
| 138 | -9.3991 | 1.00000 |
| 139 | -9.3924 | 1.00000 |
| 140 | -9.3818 | 1.00000 |
| 141 | -9.3731 | 1.00000 |
| 142 | -9.3151 | 1.00000 |
| 143 | -9.3079 | 1.00000 |
| 144 | -9.2917 | 1.00000 |
| 145 | -9.2824 | 1.00000 |
| 146 | -9.2695 | 1.00000 |
| 147 | -9.0948 | 1.00000 |
| 148 | -9.0074 | 1.00000 |
| 149 | -8.9776 | 1.00000 |
| 150 | -8.9618 | 1.00000 |
| 151 | -8.9387 | 1.00000 |
| 152 | -8.7963 | 1.00000 |
| 153 | -8.7502 | 1.00000 |
| 154 | -8.7395 | 1.00000 |
| 155 | -8.7224 | 1.00000 |
| 156 | -8.7127 | 1.00000 |
| 157 | -8.6921 | 1.00000 |
| 158 | -8.6804 | 1.00000 |

|     |         |         |
|-----|---------|---------|
| 159 | -8.6737 | 1.00000 |
| 160 | -8.6575 | 1.00000 |
| 161 | -8.5978 | 1.00000 |
| 162 | -8.5876 | 1.00000 |
| 163 | -8.5805 | 1.00000 |
| 164 | -8.5719 | 1.00000 |
| 165 | -8.4932 | 1.00000 |
| 166 | -8.4619 | 1.00000 |
| 167 | -8.4407 | 1.00000 |
| 168 | -8.3505 | 1.00000 |
| 169 | -8.3019 | 1.00000 |
| 170 | -8.2778 | 1.00000 |
| 171 | -8.2677 | 1.00000 |
| 172 | -8.2379 | 1.00000 |
| 173 | -8.2367 | 1.00000 |
| 174 | -8.1560 | 1.00000 |
| 175 | -8.1496 | 1.00000 |
| 176 | -8.0807 | 1.00000 |
| 177 | -8.0485 | 1.00000 |
| 178 | -8.0306 | 1.00000 |
| 179 | -8.0252 | 1.00000 |
| 180 | -7.9774 | 1.00000 |

|     |         |         |
|-----|---------|---------|
| 181 | -7.9690 | 1.00000 |
| 182 | -7.9287 | 1.00000 |
| 183 | -7.9052 | 1.00000 |
| 184 | -7.8893 | 1.00000 |
| 185 | -7.8771 | 1.00000 |
| 186 | -7.8050 | 1.00000 |
| 187 | -7.8018 | 1.00000 |
| 188 | -7.7513 | 1.00000 |
| 189 | -7.7148 | 1.00000 |
| 190 | -7.6701 | 1.00000 |
| 191 | -7.6050 | 1.00000 |
| 192 | -7.5896 | 1.00000 |
| 193 | -7.5798 | 1.00000 |
| 194 | -7.5524 | 1.00000 |
| 195 | -7.4851 | 1.00000 |
| 196 | -7.4846 | 1.00000 |
| 197 | -7.4335 | 1.00000 |
| 198 | -7.3298 | 1.00000 |
| 199 | -7.2539 | 1.00000 |
| 200 | -7.1501 | 1.00000 |
| 201 | -7.0695 | 1.00000 |
| 202 | -7.0453 | 1.00000 |

|     |         |         |
|-----|---------|---------|
| 203 | -7.0331 | 1.00000 |
| 204 | -7.0183 | 1.00000 |
| 205 | -7.0015 | 1.00000 |
| 206 | -6.9947 | 1.00000 |
| 207 | -6.9800 | 1.00000 |
| 208 | -6.8699 | 1.00000 |
| 209 | -6.8251 | 1.00000 |
| 210 | -6.8059 | 1.00000 |
| 211 | -6.7974 | 1.00000 |
| 212 | -6.7365 | 1.00000 |
| 213 | -6.6892 | 1.00000 |
| 214 | -6.4767 | 1.00000 |
| 215 | -6.4295 | 1.00000 |
| 216 | -6.4009 | 1.00000 |
| 217 | -6.3957 | 1.00000 |
| 218 | -6.3791 | 1.00000 |
| 219 | -6.3777 | 1.00000 |
| 220 | -6.3221 | 1.00000 |
| 221 | -6.3121 | 1.00000 |
| 222 | -6.2412 | 1.00000 |
| 223 | -6.2341 | 1.00000 |
| 224 | -6.2338 | 1.00000 |

|     |         |         |
|-----|---------|---------|
| 225 | -6.0826 | 1.00000 |
| 226 | -6.0426 | 1.00000 |
| 227 | -5.7972 | 1.00000 |
| 228 | -5.7572 | 1.00000 |
| 229 | -5.6998 | 1.00000 |
| 230 | -5.6458 | 1.00000 |
| 231 | -5.6417 | 1.00000 |
| 232 | -5.5634 | 1.00000 |
| 233 | -5.5349 | 1.00000 |
| 234 | -5.4731 | 1.00000 |
| 235 | -5.4445 | 1.00000 |
| 236 | -5.1677 | 1.00000 |
| 237 | -5.0637 | 1.00000 |
| 238 | -5.0559 | 1.00000 |
| 239 | -5.0234 | 1.00000 |
| 240 | -4.9946 | 1.00000 |
| 241 | -4.9158 | 1.00000 |
| 242 | -4.8585 | 1.00000 |
| 243 | -4.8282 | 1.00000 |
| 244 | -4.7955 | 1.00000 |
| 245 | -4.6832 | 1.00000 |
| 246 | -4.5776 | 1.00000 |

|     |         |         |
|-----|---------|---------|
| 247 | -4.5764 | 1.00000 |
| 248 | -4.5120 | 1.00000 |
| 249 | -4.4504 | 1.00000 |
| 250 | -4.3892 | 1.00000 |
| 251 | -4.2973 | 1.00000 |
| 252 | -4.2722 | 1.00000 |
| 253 | -4.2177 | 1.00000 |
| 254 | -3.5752 | 1.00000 |
| 255 | -3.3596 | 1.00000 |
| 256 | -3.2104 | 1.00000 |
| 257 | -2.9435 | 1.00000 |
| 258 | -2.8534 | 1.00000 |
| 259 | -2.8290 | 1.00000 |
| 260 | -2.6144 | 1.00000 |
| 261 | -1.9128 | 0.00000 |
| 262 | -1.7740 | 0.00000 |
| 263 | -1.7240 | 0.00000 |
| 264 | -1.3521 | 0.00000 |
| 265 | -1.3201 | 0.00000 |
| 266 | -1.2013 | 0.00000 |
| 267 | -0.7529 | 0.00000 |
| 268 | -0.5895 | 0.00000 |

|     |         |         |
|-----|---------|---------|
| 269 | -0.5070 | 0.00000 |
| 270 | -0.3128 | 0.00000 |
| 271 | -0.3108 | 0.00000 |
| 272 | -0.2950 | 0.00000 |
| 273 | -0.1879 | 0.00000 |
| 274 | -0.0629 | 0.00000 |
| 275 | -0.0545 | 0.00000 |
| 276 | -0.0153 | 0.00000 |
| 277 | 0.0301  | 0.00000 |
| 278 | 0.0794  | 0.00000 |
| 279 | 0.1681  | 0.00000 |
| 280 | 0.2154  | 0.00000 |
| 281 | 0.2431  | 0.00000 |
| 282 | 0.4153  | 0.00000 |
| 283 | 0.4431  | 0.00000 |
| 284 | 0.4772  | 0.00000 |
| 285 | 0.5999  | 0.00000 |
| 286 | 0.6751  | 0.00000 |
| 287 | 0.8186  | 0.00000 |
| 288 | 0.8774  | 0.00000 |
| 289 | 1.0445  | 0.00000 |
| 290 | 1.0842  | 0.00000 |

|     |        |         |
|-----|--------|---------|
| 291 | 1.1199 | 0.00000 |
| 292 | 1.1609 | 0.00000 |
| 293 | 1.2221 | 0.00000 |
| 294 | 1.2437 | 0.00000 |
| 295 | 1.2853 | 0.00000 |
| 296 | 1.3135 | 0.00000 |
| 297 | 1.3439 | 0.00000 |
| 298 | 1.4106 | 0.00000 |
| 299 | 1.4660 | 0.00000 |
| 300 | 1.4835 | 0.00000 |
| 301 | 1.5495 | 0.00000 |
| 302 | 1.5866 | 0.00000 |
| 303 | 1.6232 | 0.00000 |
| 304 | 1.6767 | 0.00000 |
| 305 | 1.7488 | 0.00000 |
| 306 | 1.7606 | 0.00000 |
| 307 | 1.8776 | 0.00000 |
| 308 | 1.8964 | 0.00000 |
| 309 | 1.9033 | 0.00000 |
| 310 | 1.9161 | 0.00000 |
| 311 | 2.1220 | 0.00000 |
| 312 | 2.1887 | 0.00000 |

|     |        |         |
|-----|--------|---------|
| 313 | 2.2063 | 0.00000 |
| 314 | 2.2339 | 0.00000 |
| 315 | 2.2744 | 0.00000 |
| 316 | 2.2909 | 0.00000 |
| 317 | 2.3306 | 0.00000 |
| 318 | 2.3506 | 0.00000 |
| 319 | 2.3692 | 0.00000 |
| 320 | 2.3954 | 0.00000 |
| 321 | 2.4206 | 0.00000 |
| 322 | 2.4284 | 0.00000 |
| 323 | 2.4452 | 0.00000 |
| 324 | 2.4532 | 0.00000 |
| 325 | 2.4630 | 0.00000 |
| 326 | 2.5266 | 0.00000 |
| 327 | 2.5408 | 0.00000 |
| 328 | 2.7018 | 0.00000 |
| 329 | 2.7297 | 0.00000 |
| 330 | 2.7512 | 0.00000 |
| 331 | 2.7546 | 0.00000 |
| 332 | 2.7647 | 0.00000 |
| 333 | 2.8139 | 0.00000 |
| 334 | 2.8323 | 0.00000 |

|     |        |         |
|-----|--------|---------|
| 335 | 2.8569 | 0.00000 |
| 336 | 2.8911 | 0.00000 |
| 337 | 2.9243 | 0.00000 |
| 338 | 2.9463 | 0.00000 |
| 339 | 2.9777 | 0.00000 |
| 340 | 3.0038 | 0.00000 |
| 341 | 3.0334 | 0.00000 |
| 342 | 3.0453 | 0.00000 |
| 343 | 3.0657 | 0.00000 |
| 344 | 3.0836 | 0.00000 |
| 345 | 3.1515 | 0.00000 |
| 346 | 3.1630 | 0.00000 |
| 347 | 3.1809 | 0.00000 |
| 348 | 3.1912 | 0.00000 |
| 349 | 3.3023 | 0.00000 |
| 350 | 3.3247 | 0.00000 |
| 351 | 3.3534 | 0.00000 |
| 352 | 3.3684 | 0.00000 |
| 353 | 3.3914 | 0.00000 |
| 354 | 3.4347 | 0.00000 |
| 355 | 3.4775 | 0.00000 |
| 356 | 3.4805 | 0.00000 |

|     |        |         |
|-----|--------|---------|
| 357 | 3.4851 | 0.00000 |
| 358 | 3.4949 | 0.00000 |
| 359 | 3.6355 | 0.00000 |
| 360 | 3.6731 | 0.00000 |
| 361 | 3.6893 | 0.00000 |
| 362 | 3.7308 | 0.00000 |
| 363 | 3.7493 | 0.00000 |
| 364 | 3.7570 | 0.00000 |
| 365 | 3.7728 | 0.00000 |
| 366 | 3.7932 | 0.00000 |
| 367 | 3.8105 | 0.00000 |
| 368 | 3.8307 | 0.00000 |
| 369 | 3.8364 | 0.00000 |
| 370 | 3.8503 | 0.00000 |
| 371 | 3.8749 | 0.00000 |
| 372 | 3.8815 | 0.00000 |
| 373 | 3.9092 | 0.00000 |
| 374 | 3.9210 | 0.00000 |
| 375 | 3.9334 | 0.00000 |
| 376 | 3.9570 | 0.00000 |
| 377 | 3.9713 | 0.00000 |
| 378 | 3.9847 | 0.00000 |

|     |        |         |
|-----|--------|---------|
| 379 | 4.0165 | 0.00000 |
| 380 | 4.0713 | 0.00000 |
| 381 | 4.1645 | 0.00000 |
| 382 | 4.2457 | 0.00000 |
| 383 | 4.2569 | 0.00000 |
| 384 | 4.2583 | 0.00000 |
| 385 | 4.2846 | 0.00000 |
| 386 | 4.3130 | 0.00000 |
| 387 | 4.3273 | 0.00000 |
| 388 | 4.3413 | 0.00000 |
| 389 | 4.3694 | 0.00000 |
| 390 | 4.3792 | 0.00000 |
| 391 | 4.4177 | 0.00000 |
| 392 | 4.4447 | 0.00000 |
| 393 | 4.4702 | 0.00000 |
| 394 | 4.4802 | 0.00000 |
| 395 | 4.4842 | 0.00000 |
| 396 | 4.4963 | 0.00000 |
| 397 | 4.5181 | 0.00000 |
| 398 | 4.5490 | 0.00000 |
| 399 | 4.5885 | 0.00000 |
| 400 | 4.6073 | 0.00000 |

|     |        |         |
|-----|--------|---------|
| 401 | 4.6261 | 0.00000 |
| 402 | 4.6416 | 0.00000 |
| 403 | 4.6563 | 0.00000 |
| 404 | 4.6787 | 0.00000 |
| 405 | 4.7034 | 0.00000 |
| 406 | 4.7308 | 0.00000 |
| 407 | 4.7472 | 0.00000 |
| 408 | 4.7674 | 0.00000 |
| 409 | 4.7825 | 0.00000 |
| 410 | 4.7833 | 0.00000 |
| 411 | 4.7973 | 0.00000 |
| 412 | 4.8276 | 0.00000 |
| 413 | 4.8605 | 0.00000 |
| 414 | 4.8715 | 0.00000 |
| 415 | 4.8976 | 0.00000 |
| 416 | 4.9318 | 0.00000 |
| 417 | 4.9829 | 0.00000 |
| 418 | 5.0039 | 0.00000 |
| 419 | 5.0101 | 0.00000 |
| 420 | 5.0341 | 0.00000 |
| 421 | 5.0383 | 0.00000 |
| 422 | 5.0642 | 0.00000 |

|     |        |         |
|-----|--------|---------|
| 423 | 5.0816 | 0.00000 |
| 424 | 5.1144 | 0.00000 |
| 425 | 5.1173 | 0.00000 |
| 426 | 5.1366 | 0.00000 |
| 427 | 5.1405 | 0.00000 |
| 428 | 5.1510 | 0.00000 |
| 429 | 5.1744 | 0.00000 |
| 430 | 5.1844 | 0.00000 |
| 431 | 5.1873 | 0.00000 |
| 432 | 5.2165 | 0.00000 |
| 433 | 5.2343 | 0.00000 |
| 434 | 5.2413 | 0.00000 |
| 435 | 5.2556 | 0.00000 |
| 436 | 5.2871 | 0.00000 |
| 437 | 5.2936 | 0.00000 |
| 438 | 5.3076 | 0.00000 |
| 439 | 5.3326 | 0.00000 |
| 440 | 5.3476 | 0.00000 |
| 441 | 5.3654 | 0.00000 |
| 442 | 5.3721 | 0.00000 |
| 443 | 5.3896 | 0.00000 |
| 444 | 5.4209 | 0.00000 |

|     |        |         |
|-----|--------|---------|
| 445 | 5.4527 | 0.00000 |
| 446 | 5.4639 | 0.00000 |
| 447 | 5.4808 | 0.00000 |
| 448 | 5.4944 | 0.00000 |
| 449 | 5.5163 | 0.00000 |
| 450 | 5.5486 | 0.00000 |
| 451 | 5.5663 | 0.00000 |
| 452 | 5.5743 | 0.00000 |
| 453 | 5.5955 | 0.00000 |
| 454 | 5.6118 | 0.00000 |
| 455 | 5.6551 | 0.00000 |
| 456 | 5.6806 | 0.00000 |
| 457 | 5.7078 | 0.00000 |
| 458 | 5.7228 | 0.00000 |
| 459 | 5.7443 | 0.00000 |
| 460 | 5.7581 | 0.00000 |
| 461 | 5.7810 | 0.00000 |
| 462 | 5.7873 | 0.00000 |
| 463 | 5.7939 | 0.00000 |
| 464 | 5.7989 | 0.00000 |
| 465 | 5.8072 | 0.00000 |
| 466 | 5.8243 | 0.00000 |

|     |        |         |
|-----|--------|---------|
| 467 | 5.8413 | 0.00000 |
| 468 | 5.8564 | 0.00000 |
| 469 | 5.8727 | 0.00000 |
| 470 | 5.8797 | 0.00000 |
| 471 | 5.8860 | 0.00000 |
| 472 | 5.9068 | 0.00000 |
| 473 | 5.9159 | 0.00000 |
| 474 | 5.9395 | 0.00000 |
| 475 | 5.9576 | 0.00000 |
| 476 | 5.9746 | 0.00000 |
| 477 | 5.9960 | 0.00000 |
| 478 | 6.0103 | 0.00000 |
| 479 | 6.0195 | 0.00000 |
| 480 | 6.1033 | 0.00000 |

spin component 2

k-point 1 : 0.0000 0.0000 0.0000

| band No. | band energies | occupation |
|----------|---------------|------------|
| 1        | -26.7154      | 1.00000    |
| 2        | -21.5736      | 1.00000    |
| 3        | -21.4751      | 1.00000    |

|    |          |         |
|----|----------|---------|
| 4  | -21.1066 | 1.00000 |
| 5  | -21.0734 | 1.00000 |
| 6  | -21.0187 | 1.00000 |
| 7  | -20.9823 | 1.00000 |
| 8  | -20.9800 | 1.00000 |
| 9  | -20.8858 | 1.00000 |
| 10 | -20.5654 | 1.00000 |
| 11 | -20.5057 | 1.00000 |
| 12 | -20.4060 | 1.00000 |
| 13 | -20.3934 | 1.00000 |
| 14 | -20.1330 | 1.00000 |
| 15 | -19.9583 | 1.00000 |
| 16 | -19.7139 | 1.00000 |
| 17 | -19.6321 | 1.00000 |
| 18 | -19.6031 | 1.00000 |
| 19 | -19.5833 | 1.00000 |
| 20 | -19.5323 | 1.00000 |
| 21 | -19.5301 | 1.00000 |
| 22 | -19.4814 | 1.00000 |
| 23 | -19.4666 | 1.00000 |
| 24 | -19.1215 | 1.00000 |
| 25 | -19.0789 | 1.00000 |

|    |          |         |
|----|----------|---------|
| 26 | -18.9750 | 1.00000 |
| 27 | -18.9603 | 1.00000 |
| 28 | -18.9044 | 1.00000 |
| 29 | -18.7094 | 1.00000 |
| 30 | -18.5141 | 1.00000 |
| 31 | -18.3581 | 1.00000 |
| 32 | -18.2527 | 1.00000 |
| 33 | -18.2320 | 1.00000 |
| 34 | -18.1845 | 1.00000 |
| 35 | -18.1824 | 1.00000 |
| 36 | -18.0649 | 1.00000 |
| 37 | -18.0614 | 1.00000 |
| 38 | -17.5733 | 1.00000 |
| 39 | -17.3034 | 1.00000 |
| 40 | -17.2931 | 1.00000 |
| 41 | -17.2786 | 1.00000 |
| 42 | -17.2132 | 1.00000 |
| 43 | -17.2116 | 1.00000 |
| 44 | -17.1827 | 1.00000 |
| 45 | -17.0251 | 1.00000 |
| 46 | -16.9471 | 1.00000 |
| 47 | -16.9279 | 1.00000 |

|    |          |         |
|----|----------|---------|
| 48 | -16.8757 | 1.00000 |
| 49 | -16.8746 | 1.00000 |
| 50 | -16.8344 | 1.00000 |
| 51 | -16.8284 | 1.00000 |
| 52 | -16.8235 | 1.00000 |
| 53 | -16.8207 | 1.00000 |
| 54 | -16.7362 | 1.00000 |
| 55 | -16.7300 | 1.00000 |
| 56 | -16.1923 | 1.00000 |
| 57 | -15.7339 | 1.00000 |
| 58 | -15.6633 | 1.00000 |
| 59 | -15.6498 | 1.00000 |
| 60 | -15.6258 | 1.00000 |
| 61 | -15.5717 | 1.00000 |
| 62 | -15.5328 | 1.00000 |
| 63 | -15.5299 | 1.00000 |
| 64 | -15.1789 | 1.00000 |
| 65 | -14.8133 | 1.00000 |
| 66 | -14.6134 | 1.00000 |
| 67 | -14.5652 | 1.00000 |
| 68 | -14.5054 | 1.00000 |
| 69 | -14.5034 | 1.00000 |

|    |          |         |
|----|----------|---------|
| 70 | -14.4696 | 1.00000 |
| 71 | -14.4440 | 1.00000 |
| 72 | -14.3362 | 1.00000 |
| 73 | -14.3034 | 1.00000 |
| 74 | -14.2729 | 1.00000 |
| 75 | -14.2690 | 1.00000 |
| 76 | -14.1691 | 1.00000 |
| 77 | -14.1658 | 1.00000 |
| 78 | -13.8931 | 1.00000 |
| 79 | -13.7646 | 1.00000 |
| 80 | -13.5970 | 1.00000 |
| 81 | -13.5430 | 1.00000 |
| 82 | -13.5234 | 1.00000 |
| 83 | -13.4998 | 1.00000 |
| 84 | -13.4508 | 1.00000 |
| 85 | -13.3486 | 1.00000 |
| 86 | -13.3458 | 1.00000 |
| 87 | -13.1930 | 1.00000 |
| 88 | -12.7860 | 1.00000 |
| 89 | -12.7555 | 1.00000 |
| 90 | -12.7238 | 1.00000 |
| 91 | -12.6824 | 1.00000 |

|     |          |         |
|-----|----------|---------|
| 92  | -12.6757 | 1.00000 |
| 93  | -12.6271 | 1.00000 |
| 94  | -12.4533 | 1.00000 |
| 95  | -12.4361 | 1.00000 |
| 96  | -12.3837 | 1.00000 |
| 97  | -12.3288 | 1.00000 |
| 98  | -12.2132 | 1.00000 |
| 99  | -12.2030 | 1.00000 |
| 100 | -12.1688 | 1.00000 |
| 101 | -11.9421 | 1.00000 |
| 102 | -11.6876 | 1.00000 |
| 103 | -11.6108 | 1.00000 |
| 104 | -11.5968 | 1.00000 |
| 105 | -11.5594 | 1.00000 |
| 106 | -11.0899 | 1.00000 |
| 107 | -11.0331 | 1.00000 |
| 108 | -10.8926 | 1.00000 |
| 109 | -10.8815 | 1.00000 |
| 110 | -10.8318 | 1.00000 |
| 111 | -10.7098 | 1.00000 |
| 112 | -10.6799 | 1.00000 |
| 113 | -10.6625 | 1.00000 |

|     |          |         |
|-----|----------|---------|
| 114 | -10.6468 | 1.00000 |
| 115 | -10.5862 | 1.00000 |
| 116 | -10.5789 | 1.00000 |
| 117 | -10.5743 | 1.00000 |
| 118 | -10.5704 | 1.00000 |
| 119 | -10.5203 | 1.00000 |
| 120 | -10.5195 | 1.00000 |
| 121 | -10.5062 | 1.00000 |
| 122 | -10.5015 | 1.00000 |
| 123 | -10.3825 | 1.00000 |
| 124 | -10.2944 | 1.00000 |
| 125 | -10.2600 | 1.00000 |
| 126 | -10.1888 | 1.00000 |
| 127 | -10.1877 | 1.00000 |
| 128 | -10.0219 | 1.00000 |
| 129 | -9.9614  | 1.00000 |
| 130 | -9.8860  | 1.00000 |
| 131 | -9.8521  | 1.00000 |
| 132 | -9.7870  | 1.00000 |
| 133 | -9.7816  | 1.00000 |
| 134 | -9.7392  | 1.00000 |
| 135 | -9.6688  | 1.00000 |

|     |         |         |
|-----|---------|---------|
| 136 | -9.4453 | 1.00000 |
| 137 | -9.4241 | 1.00000 |
| 138 | -9.3887 | 1.00000 |
| 139 | -9.3833 | 1.00000 |
| 140 | -9.3732 | 1.00000 |
| 141 | -9.3638 | 1.00000 |
| 142 | -9.3128 | 1.00000 |
| 143 | -9.3057 | 1.00000 |
| 144 | -9.2904 | 1.00000 |
| 145 | -9.2786 | 1.00000 |
| 146 | -9.2500 | 1.00000 |
| 147 | -9.0935 | 1.00000 |
| 148 | -9.0038 | 1.00000 |
| 149 | -8.9643 | 1.00000 |
| 150 | -8.9476 | 1.00000 |
| 151 | -8.9337 | 1.00000 |
| 152 | -8.7938 | 1.00000 |
| 153 | -8.7424 | 1.00000 |
| 154 | -8.7369 | 1.00000 |
| 155 | -8.7167 | 1.00000 |
| 156 | -8.7089 | 1.00000 |
| 157 | -8.6748 | 1.00000 |

|     |         |         |
|-----|---------|---------|
| 158 | -8.6686 | 1.00000 |
| 159 | -8.6600 | 1.00000 |
| 160 | -8.6567 | 1.00000 |
| 161 | -8.5803 | 1.00000 |
| 162 | -8.5752 | 1.00000 |
| 163 | -8.5704 | 1.00000 |
| 164 | -8.5538 | 1.00000 |
| 165 | -8.4928 | 1.00000 |
| 166 | -8.4613 | 1.00000 |
| 167 | -8.4390 | 1.00000 |
| 168 | -8.3479 | 1.00000 |
| 169 | -8.2992 | 1.00000 |
| 170 | -8.2760 | 1.00000 |
| 171 | -8.2372 | 1.00000 |
| 172 | -8.2341 | 1.00000 |
| 173 | -8.2318 | 1.00000 |
| 174 | -8.1458 | 1.00000 |
| 175 | -8.1383 | 1.00000 |
| 176 | -8.0775 | 1.00000 |
| 177 | -8.0464 | 1.00000 |
| 178 | -8.0182 | 1.00000 |
| 179 | -8.0098 | 1.00000 |

|     |         |         |
|-----|---------|---------|
| 180 | -7.9727 | 1.00000 |
| 181 | -7.9641 | 1.00000 |
| 182 | -7.9246 | 1.00000 |
| 183 | -7.8957 | 1.00000 |
| 184 | -7.8755 | 1.00000 |
| 185 | -7.8682 | 1.00000 |
| 186 | -7.7962 | 1.00000 |
| 187 | -7.7925 | 1.00000 |
| 188 | -7.7418 | 1.00000 |
| 189 | -7.6836 | 1.00000 |
| 190 | -7.6399 | 1.00000 |
| 191 | -7.6027 | 1.00000 |
| 192 | -7.5818 | 1.00000 |
| 193 | -7.5595 | 1.00000 |
| 194 | -7.5441 | 1.00000 |
| 195 | -7.4771 | 1.00000 |
| 196 | -7.4770 | 1.00000 |
| 197 | -7.4324 | 1.00000 |
| 198 | -7.3289 | 1.00000 |
| 199 | -7.2406 | 1.00000 |
| 200 | -7.1464 | 1.00000 |
| 201 | -7.0606 | 1.00000 |

|     |         |         |
|-----|---------|---------|
| 202 | -7.0405 | 1.00000 |
| 203 | -7.0190 | 1.00000 |
| 204 | -6.9899 | 1.00000 |
| 205 | -6.9825 | 1.00000 |
| 206 | -6.9773 | 1.00000 |
| 207 | -6.9455 | 1.00000 |
| 208 | -6.8662 | 1.00000 |
| 209 | -6.8208 | 1.00000 |
| 210 | -6.7998 | 1.00000 |
| 211 | -6.7923 | 1.00000 |
| 212 | -6.7297 | 1.00000 |
| 213 | -6.6798 | 1.00000 |
| 214 | -6.4735 | 1.00000 |
| 215 | -6.3998 | 1.00000 |
| 216 | -6.3879 | 1.00000 |
| 217 | -6.3830 | 1.00000 |
| 218 | -6.3683 | 1.00000 |
| 219 | -6.3436 | 1.00000 |
| 220 | -6.3080 | 1.00000 |
| 221 | -6.2807 | 1.00000 |
| 222 | -6.2340 | 1.00000 |
| 223 | -6.2326 | 1.00000 |

|     |         |         |
|-----|---------|---------|
| 224 | -6.2268 | 1.00000 |
| 225 | -6.0519 | 1.00000 |
| 226 | -6.0140 | 1.00000 |
| 227 | -5.7609 | 1.00000 |
| 228 | -5.7165 | 1.00000 |
| 229 | -5.6981 | 1.00000 |
| 230 | -5.6403 | 1.00000 |
| 231 | -5.6273 | 1.00000 |
| 232 | -5.5485 | 1.00000 |
| 233 | -5.5279 | 1.00000 |
| 234 | -5.4466 | 1.00000 |
| 235 | -5.4171 | 1.00000 |
| 236 | -5.1455 | 1.00000 |
| 237 | -5.0649 | 1.00000 |
| 238 | -5.0316 | 1.00000 |
| 239 | -5.0276 | 1.00000 |
| 240 | -4.9653 | 1.00000 |
| 241 | -4.8830 | 1.00000 |
| 242 | -4.8593 | 1.00000 |
| 243 | -4.8086 | 1.00000 |
| 244 | -4.7835 | 1.00000 |
| 245 | -4.6530 | 1.00000 |

|     |         |         |
|-----|---------|---------|
| 246 | -4.5839 | 1.00000 |
| 247 | -4.5807 | 1.00000 |
| 248 | -4.4820 | 1.00000 |
| 249 | -4.4261 | 1.00000 |
| 250 | -4.4004 | 1.00000 |
| 251 | -4.3011 | 1.00000 |
| 252 | -4.2335 | 1.00000 |
| 253 | -4.1802 | 1.00000 |
| 254 | -3.5495 | 1.00000 |
| 255 | -3.3143 | 1.00000 |
| 256 | -3.1512 | 1.00000 |
| 257 | -2.9484 | 1.00000 |
| 258 | -2.8043 | 1.00000 |
| 259 | -2.7460 | 1.00000 |
| 260 | -2.0671 | 0.00000 |
| 261 | -1.9187 | 0.00000 |
| 262 | -1.7287 | 0.00000 |
| 263 | -1.6842 | 0.00000 |
| 264 | -1.3075 | 0.00000 |
| 265 | -1.2883 | 0.00000 |
| 266 | -1.1655 | 0.00000 |
| 267 | -0.7315 | 0.00000 |

|     |         |         |
|-----|---------|---------|
| 268 | -0.5889 | 0.00000 |
| 269 | -0.5146 | 0.00000 |
| 270 | -0.2857 | 0.00000 |
| 271 | -0.2828 | 0.00000 |
| 272 | -0.2649 | 0.00000 |
| 273 | -0.1612 | 0.00000 |
| 274 | -0.0626 | 0.00000 |
| 275 | -0.0531 | 0.00000 |
| 276 | 0.0085  | 0.00000 |
| 277 | 0.0351  | 0.00000 |
| 278 | 0.0743  | 0.00000 |
| 279 | 0.2034  | 0.00000 |
| 280 | 0.2506  | 0.00000 |
| 281 | 0.2748  | 0.00000 |
| 282 | 0.4292  | 0.00000 |
| 283 | 0.4473  | 0.00000 |
| 284 | 0.4784  | 0.00000 |
| 285 | 0.6047  | 0.00000 |
| 286 | 0.6954  | 0.00000 |
| 287 | 0.8214  | 0.00000 |
| 288 | 0.8844  | 0.00000 |
| 289 | 1.0545  | 0.00000 |

|     |        |         |
|-----|--------|---------|
| 290 | 1.1026 | 0.00000 |
| 291 | 1.1401 | 0.00000 |
| 292 | 1.1759 | 0.00000 |
| 293 | 1.2310 | 0.00000 |
| 294 | 1.2498 | 0.00000 |
| 295 | 1.3064 | 0.00000 |
| 296 | 1.3187 | 0.00000 |
| 297 | 1.3579 | 0.00000 |
| 298 | 1.4294 | 0.00000 |
| 299 | 1.4812 | 0.00000 |
| 300 | 1.4982 | 0.00000 |
| 301 | 1.5747 | 0.00000 |
| 302 | 1.6017 | 0.00000 |
| 303 | 1.6521 | 0.00000 |
| 304 | 1.6854 | 0.00000 |
| 305 | 1.7564 | 0.00000 |
| 306 | 1.7706 | 0.00000 |
| 307 | 1.8811 | 0.00000 |
| 308 | 1.8996 | 0.00000 |
| 309 | 1.9062 | 0.00000 |
| 310 | 1.9270 | 0.00000 |
| 311 | 2.1384 | 0.00000 |

|     |        |         |
|-----|--------|---------|
| 312 | 2.1995 | 0.00000 |
| 313 | 2.2187 | 0.00000 |
| 314 | 2.2522 | 0.00000 |
| 315 | 2.2883 | 0.00000 |
| 316 | 2.2953 | 0.00000 |
| 317 | 2.3360 | 0.00000 |
| 318 | 2.3585 | 0.00000 |
| 319 | 2.3802 | 0.00000 |
| 320 | 2.4050 | 0.00000 |
| 321 | 2.4275 | 0.00000 |
| 322 | 2.4336 | 0.00000 |
| 323 | 2.4562 | 0.00000 |
| 324 | 2.4578 | 0.00000 |
| 325 | 2.4700 | 0.00000 |
| 326 | 2.5291 | 0.00000 |
| 327 | 2.5466 | 0.00000 |
| 328 | 2.7071 | 0.00000 |
| 329 | 2.7355 | 0.00000 |
| 330 | 2.7513 | 0.00000 |
| 331 | 2.7576 | 0.00000 |
| 332 | 2.7734 | 0.00000 |
| 333 | 2.8287 | 0.00000 |

|     |        |         |
|-----|--------|---------|
| 334 | 2.8452 | 0.00000 |
| 335 | 2.8693 | 0.00000 |
| 336 | 2.9024 | 0.00000 |
| 337 | 2.9328 | 0.00000 |
| 338 | 2.9558 | 0.00000 |
| 339 | 2.9826 | 0.00000 |
| 340 | 3.0054 | 0.00000 |
| 341 | 3.0375 | 0.00000 |
| 342 | 3.0520 | 0.00000 |
| 343 | 3.0714 | 0.00000 |
| 344 | 3.0910 | 0.00000 |
| 345 | 3.1540 | 0.00000 |
| 346 | 3.1724 | 0.00000 |
| 347 | 3.1892 | 0.00000 |
| 348 | 3.1992 | 0.00000 |
| 349 | 3.3078 | 0.00000 |
| 350 | 3.3296 | 0.00000 |
| 351 | 3.3616 | 0.00000 |
| 352 | 3.3720 | 0.00000 |
| 353 | 3.3946 | 0.00000 |
| 354 | 3.4402 | 0.00000 |
| 355 | 3.4829 | 0.00000 |

|     |        |         |
|-----|--------|---------|
| 356 | 3.4894 | 0.00000 |
| 357 | 3.4916 | 0.00000 |
| 358 | 3.5013 | 0.00000 |
| 359 | 3.6404 | 0.00000 |
| 360 | 3.6770 | 0.00000 |
| 361 | 3.7017 | 0.00000 |
| 362 | 3.7366 | 0.00000 |
| 363 | 3.7530 | 0.00000 |
| 364 | 3.7590 | 0.00000 |
| 365 | 3.7776 | 0.00000 |
| 366 | 3.7978 | 0.00000 |
| 367 | 3.8133 | 0.00000 |
| 368 | 3.8382 | 0.00000 |
| 369 | 3.8459 | 0.00000 |
| 370 | 3.8648 | 0.00000 |
| 371 | 3.8786 | 0.00000 |
| 372 | 3.8907 | 0.00000 |
| 373 | 3.9209 | 0.00000 |
| 374 | 3.9328 | 0.00000 |
| 375 | 3.9470 | 0.00000 |
| 376 | 3.9592 | 0.00000 |
| 377 | 3.9822 | 0.00000 |

|     |        |         |
|-----|--------|---------|
| 378 | 3.9869 | 0.00000 |
| 379 | 4.0221 | 0.00000 |
| 380 | 4.0806 | 0.00000 |
| 381 | 4.1708 | 0.00000 |
| 382 | 4.2581 | 0.00000 |
| 383 | 4.2623 | 0.00000 |
| 384 | 4.2686 | 0.00000 |
| 385 | 4.2923 | 0.00000 |
| 386 | 4.3211 | 0.00000 |
| 387 | 4.3340 | 0.00000 |
| 388 | 4.3505 | 0.00000 |
| 389 | 4.3791 | 0.00000 |
| 390 | 4.3838 | 0.00000 |
| 391 | 4.4236 | 0.00000 |
| 392 | 4.4487 | 0.00000 |
| 393 | 4.4754 | 0.00000 |
| 394 | 4.4827 | 0.00000 |
| 395 | 4.4904 | 0.00000 |
| 396 | 4.4992 | 0.00000 |
| 397 | 4.5217 | 0.00000 |
| 398 | 4.5535 | 0.00000 |
| 399 | 4.5916 | 0.00000 |

|     |        |         |
|-----|--------|---------|
| 400 | 4.6099 | 0.00000 |
| 401 | 4.6278 | 0.00000 |
| 402 | 4.6453 | 0.00000 |
| 403 | 4.6593 | 0.00000 |
| 404 | 4.6846 | 0.00000 |
| 405 | 4.7082 | 0.00000 |
| 406 | 4.7368 | 0.00000 |
| 407 | 4.7520 | 0.00000 |
| 408 | 4.7710 | 0.00000 |
| 409 | 4.7863 | 0.00000 |
| 410 | 4.7887 | 0.00000 |
| 411 | 4.8030 | 0.00000 |
| 412 | 4.8326 | 0.00000 |
| 413 | 4.8655 | 0.00000 |
| 414 | 4.8840 | 0.00000 |
| 415 | 4.9031 | 0.00000 |
| 416 | 4.9425 | 0.00000 |
| 417 | 4.9927 | 0.00000 |
| 418 | 5.0093 | 0.00000 |
| 419 | 5.0124 | 0.00000 |
| 420 | 5.0370 | 0.00000 |
| 421 | 5.0436 | 0.00000 |

|     |        |         |
|-----|--------|---------|
| 422 | 5.0685 | 0.00000 |
| 423 | 5.0858 | 0.00000 |
| 424 | 5.1178 | 0.00000 |
| 425 | 5.1214 | 0.00000 |
| 426 | 5.1406 | 0.00000 |
| 427 | 5.1440 | 0.00000 |
| 428 | 5.1678 | 0.00000 |
| 429 | 5.1789 | 0.00000 |
| 430 | 5.1878 | 0.00000 |
| 431 | 5.1921 | 0.00000 |
| 432 | 5.2214 | 0.00000 |
| 433 | 5.2368 | 0.00000 |
| 434 | 5.2447 | 0.00000 |
| 435 | 5.2613 | 0.00000 |
| 436 | 5.2959 | 0.00000 |
| 437 | 5.3009 | 0.00000 |
| 438 | 5.3106 | 0.00000 |
| 439 | 5.3370 | 0.00000 |
| 440 | 5.3515 | 0.00000 |
| 441 | 5.3691 | 0.00000 |
| 442 | 5.3797 | 0.00000 |
| 443 | 5.3927 | 0.00000 |

|     |        |         |
|-----|--------|---------|
| 444 | 5.4292 | 0.00000 |
| 445 | 5.4590 | 0.00000 |
| 446 | 5.4705 | 0.00000 |
| 447 | 5.4862 | 0.00000 |
| 448 | 5.4992 | 0.00000 |
| 449 | 5.5229 | 0.00000 |
| 450 | 5.5674 | 0.00000 |
| 451 | 5.5720 | 0.00000 |
| 452 | 5.5932 | 0.00000 |
| 453 | 5.6080 | 0.00000 |
| 454 | 5.6216 | 0.00000 |
| 455 | 5.6671 | 0.00000 |
| 456 | 5.6914 | 0.00000 |
| 457 | 5.7168 | 0.00000 |
| 458 | 5.7271 | 0.00000 |
| 459 | 5.7486 | 0.00000 |
| 460 | 5.7628 | 0.00000 |
| 461 | 5.7885 | 0.00000 |
| 462 | 5.7900 | 0.00000 |
| 463 | 5.7969 | 0.00000 |
| 464 | 5.8029 | 0.00000 |
| 465 | 5.8198 | 0.00000 |

|     |        |         |
|-----|--------|---------|
| 466 | 5.8255 | 0.00000 |
| 467 | 5.8543 | 0.00000 |
| 468 | 5.8613 | 0.00000 |
| 469 | 5.8792 | 0.00000 |
| 470 | 5.8861 | 0.00000 |
| 471 | 5.8895 | 0.00000 |
| 472 | 5.9047 | 0.00000 |
| 473 | 5.9253 | 0.00000 |
| 474 | 5.9480 | 0.00000 |
| 475 | 5.9600 | 0.00000 |
| 476 | 5.9784 | 0.00000 |
| 477 | 5.9878 | 0.00000 |
| 478 | 6.0131 | 0.00000 |
| 479 | 6.0297 | 0.00000 |
| 480 | 6.0751 | 0.00000 |

-----

soft charge-density along one line, spin component

1

0

1

2

3

4

5

6

7

8 9

total charge-density along one line

soft charge-density along one line, spin component 2

0 1 2 3 4 5 6 7

8 9

total charge-density along one line

pseudopotential strength for first ion, spin component: 1

-2.331 -4.014 -0.002 0.000 0.000

-4.014 -6.828 -0.006 0.000 -0.000

-0.002 -0.006 -0.336 -0.000 0.000

0.000 0.000 -0.000 -0.341 -0.000

0.000 -0.000 0.000 -0.000 -0.341

pseudopotential strength for first ion, spin component: 2

-2.331 -4.014 -0.002 0.000 0.000

-4.014 -6.828 -0.006 0.000 -0.000

-0.002 -0.006 -0.336 -0.000 0.000

0.000 0.000 -0.000 -0.341 -0.000

0.000 -0.000 0.000 -0.000 -0.341

total augmentation occupancy for first ion, spin component: 1

3.579 -0.646 0.444 -0.034 -0.000

-0.646 0.130 -0.082 0.006 0.000

0.444 -0.082 0.056 -0.003 -0.000

-0.034 0.006 -0.003 0.011 0.000

-0.000 0.000 -0.000 0.000 0.007

total augmentation occupancy for first ion, spin component: 2

-0.000 0.000 -0.000 0.000 0.000

0.000 -0.000 0.000 -0.000 -0.000

-0.000 0.000 -0.000 -0.000 -0.000

0.000 -0.000 -0.000 -0.000 -0.000

0.000 -0.000 -0.000 -0.000 -0.000

----- aborting loop because EDIFF is reached -----

total charge

# of ion s p d tot

-----

|    |       |       |       |       |
|----|-------|-------|-------|-------|
| 1  | 0.646 | 0.043 | 0.000 | 0.690 |
| 2  | 0.646 | 0.043 | 0.000 | 0.690 |
| 3  | 0.646 | 0.043 | 0.000 | 0.690 |
| 4  | 0.646 | 0.043 | 0.000 | 0.690 |
| 5  | 0.646 | 0.043 | 0.000 | 0.690 |
| 6  | 0.646 | 0.043 | 0.000 | 0.690 |
| 7  | 0.646 | 0.043 | 0.000 | 0.690 |
| 8  | 0.646 | 0.043 | 0.000 | 0.690 |
| 9  | 0.646 | 0.043 | 0.000 | 0.690 |
| 10 | 0.646 | 0.043 | 0.000 | 0.690 |
| 11 | 0.646 | 0.043 | 0.000 | 0.690 |
| 12 | 0.646 | 0.043 | 0.000 | 0.690 |
| 13 | 0.646 | 0.043 | 0.000 | 0.689 |
| 14 | 0.646 | 0.043 | 0.000 | 0.689 |
| 15 | 0.648 | 0.045 | 0.000 | 0.693 |
| 16 | 0.646 | 0.043 | 0.000 | 0.689 |
| 17 | 0.646 | 0.043 | 0.000 | 0.689 |
| 18 | 0.646 | 0.043 | 0.000 | 0.689 |
| 19 | 0.646 | 0.043 | 0.000 | 0.689 |
| 20 | 0.646 | 0.043 | 0.000 | 0.689 |
| 21 | 0.646 | 0.043 | 0.000 | 0.689 |
| 22 | 0.646 | 0.044 | 0.000 | 0.690 |

|    |       |       |       |       |
|----|-------|-------|-------|-------|
| 23 | 0.542 | 0.015 | 0.000 | 0.557 |
| 24 | 0.541 | 0.015 | 0.000 | 0.556 |
| 25 | 0.870 | 1.763 | 0.000 | 2.633 |
| 26 | 0.867 | 1.785 | 0.000 | 2.653 |
| 27 | 0.867 | 1.786 | 0.000 | 2.653 |
| 28 | 0.870 | 1.762 | 0.000 | 2.632 |
| 29 | 0.865 | 1.783 | 0.000 | 2.648 |
| 30 | 0.870 | 1.763 | 0.000 | 2.633 |
| 31 | 0.867 | 1.786 | 0.000 | 2.653 |
| 32 | 0.867 | 1.786 | 0.000 | 2.653 |
| 33 | 0.870 | 1.762 | 0.000 | 2.632 |
| 34 | 0.865 | 1.783 | 0.000 | 2.648 |
| 35 | 0.870 | 1.763 | 0.000 | 2.633 |
| 36 | 0.868 | 1.787 | 0.000 | 2.654 |
| 37 | 0.867 | 1.786 | 0.000 | 2.653 |
| 38 | 0.870 | 1.763 | 0.000 | 2.633 |
| 39 | 0.865 | 1.784 | 0.000 | 2.649 |
| 40 | 0.870 | 1.763 | 0.000 | 2.633 |
| 41 | 0.868 | 1.787 | 0.000 | 2.655 |
| 42 | 0.867 | 1.786 | 0.000 | 2.653 |
| 43 | 0.871 | 1.764 | 0.000 | 2.634 |
| 44 | 0.865 | 1.783 | 0.000 | 2.648 |

|    |       |       |       |       |
|----|-------|-------|-------|-------|
| 45 | 0.870 | 1.763 | 0.000 | 2.633 |
| 46 | 0.867 | 1.786 | 0.000 | 2.653 |
| 47 | 0.867 | 1.786 | 0.000 | 2.653 |
| 48 | 0.871 | 1.763 | 0.000 | 2.634 |
| 49 | 0.865 | 1.783 | 0.000 | 2.648 |
| 50 | 0.870 | 1.763 | 0.000 | 2.633 |
| 51 | 0.867 | 1.786 | 0.000 | 2.653 |
| 52 | 0.867 | 1.786 | 0.000 | 2.653 |
| 53 | 0.870 | 1.762 | 0.000 | 2.632 |
| 54 | 0.865 | 1.784 | 0.000 | 2.648 |
| 55 | 0.865 | 1.784 | 0.000 | 2.649 |
| 56 | 0.865 | 1.786 | 0.000 | 2.651 |
| 57 | 0.866 | 1.787 | 0.000 | 2.653 |
| 58 | 0.866 | 1.790 | 0.000 | 2.656 |
| 59 | 0.865 | 1.786 | 0.000 | 2.651 |
| 60 | 0.866 | 1.786 | 0.000 | 2.651 |
| 61 | 0.866 | 1.788 | 0.000 | 2.654 |
| 62 | 0.867 | 1.791 | 0.000 | 2.658 |
| 63 | 0.865 | 1.784 | 0.000 | 2.649 |
| 64 | 0.865 | 1.786 | 0.000 | 2.651 |
| 65 | 0.866 | 1.787 | 0.000 | 2.652 |
| 66 | 0.865 | 1.788 | 0.000 | 2.653 |

|    |       |       |       |       |
|----|-------|-------|-------|-------|
| 67 | 0.865 | 1.786 | 0.000 | 2.651 |
| 68 | 0.866 | 1.785 | 0.000 | 2.651 |
| 69 | 0.865 | 1.787 | 0.000 | 2.652 |
| 70 | 0.866 | 1.787 | 0.000 | 2.653 |
| 71 | 0.865 | 1.784 | 0.000 | 2.649 |
| 72 | 0.865 | 1.786 | 0.000 | 2.651 |
| 73 | 0.866 | 1.786 | 0.000 | 2.652 |
| 74 | 0.864 | 1.785 | 0.000 | 2.649 |
| 75 | 0.865 | 1.786 | 0.000 | 2.651 |
| 76 | 0.866 | 1.786 | 0.000 | 2.651 |
| 77 | 0.865 | 1.786 | 0.000 | 2.651 |
| 78 | 0.865 | 1.784 | 0.000 | 2.649 |
| 79 | 0.865 | 1.784 | 0.000 | 2.649 |
| 80 | 0.865 | 1.786 | 0.000 | 2.651 |
| 81 | 0.865 | 1.785 | 0.000 | 2.650 |
| 82 | 0.863 | 1.782 | 0.000 | 2.645 |
| 83 | 0.865 | 1.786 | 0.000 | 2.651 |
| 84 | 0.866 | 1.786 | 0.000 | 2.651 |
| 85 | 0.865 | 1.784 | 0.000 | 2.648 |
| 86 | 0.862 | 1.774 | 0.000 | 2.636 |
| 87 | 0.865 | 1.784 | 0.000 | 2.649 |
| 88 | 0.865 | 1.787 | 0.000 | 2.652 |

|     |       |       |       |       |
|-----|-------|-------|-------|-------|
| 89  | 0.865 | 1.785 | 0.000 | 2.650 |
| 90  | 0.865 | 1.788 | 0.000 | 2.653 |
| 91  | 0.865 | 1.786 | 0.000 | 2.651 |
| 92  | 0.866 | 1.786 | 0.000 | 2.651 |
| 93  | 0.864 | 1.783 | 0.000 | 2.647 |
| 94  | 0.866 | 1.785 | 0.000 | 2.651 |
| 95  | 0.865 | 1.784 | 0.000 | 2.649 |
| 96  | 0.865 | 1.786 | 0.000 | 2.651 |
| 97  | 0.866 | 1.787 | 0.000 | 2.653 |
| 98  | 0.866 | 1.789 | 0.000 | 2.655 |
| 99  | 0.865 | 1.786 | 0.000 | 2.651 |
| 100 | 0.866 | 1.786 | 0.000 | 2.651 |
| 101 | 0.865 | 1.787 | 0.000 | 2.652 |
| 102 | 0.867 | 1.790 | 0.000 | 2.657 |
| 103 | 0.865 | 1.786 | 0.000 | 2.651 |
| 104 | 0.867 | 1.785 | 0.000 | 2.653 |
| 105 | 0.866 | 1.786 | 0.000 | 2.652 |
| 106 | 0.870 | 1.778 | 0.000 | 2.648 |
| 107 | 0.869 | 1.765 | 0.000 | 2.635 |
| 108 | 0.865 | 1.783 | 0.000 | 2.648 |
| 109 | 0.869 | 1.789 | 0.000 | 2.658 |
| 110 | 0.865 | 1.786 | 0.000 | 2.651 |

|     |       |       |       |       |
|-----|-------|-------|-------|-------|
| 111 | 0.867 | 1.785 | 0.000 | 2.653 |
| 112 | 0.867 | 1.789 | 0.000 | 2.655 |
| 113 | 0.871 | 1.782 | 0.000 | 2.653 |
| 114 | 0.869 | 1.765 | 0.000 | 2.634 |
| 115 | 0.865 | 1.783 | 0.000 | 2.648 |
| 116 | 0.870 | 1.791 | 0.000 | 2.661 |
| 117 | 0.865 | 1.786 | 0.000 | 2.651 |
| 118 | 0.867 | 1.786 | 0.000 | 2.653 |
| 119 | 0.865 | 1.782 | 0.000 | 2.647 |
| 120 | 0.858 | 1.706 | 0.000 | 2.564 |
| 121 | 0.869 | 1.765 | 0.000 | 2.634 |
| 122 | 0.865 | 1.783 | 0.000 | 2.648 |
| 123 | 0.866 | 1.778 | 0.000 | 2.644 |
| 124 | 0.866 | 1.786 | 0.000 | 2.652 |
| 125 | 0.868 | 1.785 | 0.000 | 2.653 |
| 126 | 0.862 | 1.776 | 0.000 | 2.638 |
| 127 | 0.852 | 1.842 | 0.000 | 2.694 |
| 128 | 0.870 | 1.767 | 0.000 | 2.637 |
| 129 | 0.865 | 1.783 | 0.000 | 2.648 |
| 130 | 0.860 | 1.757 | 0.000 | 2.617 |
| 131 | 0.866 | 1.786 | 0.000 | 2.652 |
| 132 | 0.867 | 1.784 | 0.000 | 2.652 |

|     |       |       |       |       |
|-----|-------|-------|-------|-------|
| 133 | 0.864 | 1.787 | 0.000 | 2.651 |
| 134 | 0.869 | 1.789 | 0.000 | 2.659 |
| 135 | 0.869 | 1.767 | 0.000 | 2.636 |
| 136 | 0.865 | 1.783 | 0.000 | 2.648 |
| 137 | 0.866 | 1.772 | 0.000 | 2.638 |
| 138 | 0.866 | 1.786 | 0.000 | 2.652 |
| 139 | 0.867 | 1.785 | 0.000 | 2.652 |
| 140 | 0.866 | 1.788 | 0.000 | 2.654 |
| 141 | 0.870 | 1.779 | 0.000 | 2.649 |
| 142 | 0.869 | 1.766 | 0.000 | 2.635 |
| 143 | 0.865 | 1.783 | 0.000 | 2.648 |
| 144 | 0.869 | 1.790 | 0.000 | 2.659 |
| 145 | 0.940 | 1.711 | 0.000 | 2.651 |
| 146 | 1.240 | 1.545 | 0.075 | 2.860 |
| 147 | 1.631 | 3.510 | 0.000 | 5.141 |

-----

tot            123.061 221.535    0.075 344.670

magnetization (x)

| # of ion | s | p | d | tot |
|----------|---|---|---|-----|
|----------|---|---|---|-----|

-----

|    |        |        |       |        |
|----|--------|--------|-------|--------|
| 1  | 0.000  | -0.000 | 0.000 | 0.000  |
| 2  | -0.000 | 0.000  | 0.000 | -0.000 |
| 3  | 0.000  | -0.000 | 0.000 | 0.000  |
| 4  | -0.000 | 0.000  | 0.000 | -0.000 |
| 5  | 0.000  | -0.000 | 0.000 | 0.000  |
| 6  | -0.000 | 0.000  | 0.000 | -0.000 |
| 7  | 0.000  | -0.000 | 0.000 | 0.000  |
| 8  | -0.000 | 0.000  | 0.000 | -0.000 |
| 9  | 0.000  | -0.000 | 0.000 | 0.000  |
| 10 | -0.000 | 0.000  | 0.000 | -0.000 |
| 11 | 0.000  | -0.000 | 0.000 | 0.000  |
| 12 | -0.000 | 0.000  | 0.000 | -0.000 |
| 13 | 0.000  | -0.000 | 0.000 | 0.000  |
| 14 | -0.004 | 0.002  | 0.000 | -0.002 |
| 15 | 0.000  | -0.000 | 0.000 | 0.000  |
| 16 | -0.004 | 0.002  | 0.000 | -0.002 |
| 17 | -0.004 | 0.002  | 0.000 | -0.002 |
| 18 | 0.000  | -0.000 | 0.000 | 0.000  |
| 19 | -0.003 | 0.001  | 0.000 | -0.002 |
| 20 | 0.000  | -0.000 | 0.000 | 0.000  |

|    |        |        |       |        |
|----|--------|--------|-------|--------|
| 21 | -0.003 | 0.002  | 0.000 | -0.002 |
| 22 | -0.003 | 0.002  | 0.000 | -0.002 |
| 23 | -0.000 | 0.000  | 0.000 | -0.000 |
| 24 | -0.000 | 0.000  | 0.000 | -0.000 |
| 25 | -0.000 | -0.007 | 0.000 | -0.008 |
| 26 | -0.000 | -0.002 | 0.000 | -0.002 |
| 27 | 0.000  | 0.003  | 0.000 | 0.003  |
| 28 | 0.000  | 0.005  | 0.000 | 0.005  |
| 29 | 0.000  | 0.003  | 0.000 | 0.003  |
| 30 | -0.000 | -0.007 | 0.000 | -0.008 |
| 31 | -0.000 | -0.002 | 0.000 | -0.002 |
| 32 | 0.000  | 0.003  | 0.000 | 0.003  |
| 33 | 0.000  | 0.005  | 0.000 | 0.005  |
| 34 | 0.000  | 0.002  | 0.000 | 0.002  |
| 35 | -0.000 | -0.007 | 0.000 | -0.008 |
| 36 | -0.000 | -0.002 | 0.000 | -0.002 |
| 37 | 0.000  | 0.003  | 0.000 | 0.003  |
| 38 | 0.000  | 0.006  | 0.000 | 0.007  |
| 39 | 0.000  | 0.002  | 0.000 | 0.002  |
| 40 | -0.000 | -0.007 | 0.000 | -0.008 |
| 41 | -0.000 | -0.002 | 0.000 | -0.002 |
| 42 | 0.000  | 0.002  | 0.000 | 0.003  |

|    |        |        |       |        |
|----|--------|--------|-------|--------|
| 43 | 0.000  | 0.005  | 0.000 | 0.006  |
| 44 | 0.000  | 0.004  | 0.000 | 0.004  |
| 45 | -0.000 | -0.007 | 0.000 | -0.008 |
| 46 | -0.000 | -0.002 | 0.000 | -0.002 |
| 47 | 0.000  | 0.003  | 0.000 | 0.003  |
| 48 | 0.000  | 0.005  | 0.000 | 0.006  |
| 49 | 0.000  | 0.001  | 0.000 | 0.002  |
| 50 | -0.000 | -0.007 | 0.000 | -0.008 |
| 51 | -0.000 | -0.002 | 0.000 | -0.002 |
| 52 | 0.000  | 0.003  | 0.000 | 0.003  |
| 53 | 0.000  | 0.006  | 0.000 | 0.007  |
| 54 | 0.000  | 0.002  | 0.000 | 0.002  |
| 55 | -0.000 | -0.005 | 0.000 | -0.006 |
| 56 | -0.000 | -0.007 | 0.000 | -0.007 |
| 57 | -0.000 | -0.001 | 0.000 | -0.001 |
| 58 | -0.000 | -0.001 | 0.000 | -0.001 |
| 59 | 0.000  | 0.006  | 0.000 | 0.007  |
| 60 | 0.000  | 0.003  | 0.000 | 0.003  |
| 61 | 0.000  | 0.001  | 0.000 | 0.001  |
| 62 | 0.000  | 0.003  | 0.000 | 0.003  |
| 63 | -0.000 | -0.005 | 0.000 | -0.006 |
| 64 | -0.000 | -0.007 | 0.000 | -0.007 |

|    |        |        |       |        |
|----|--------|--------|-------|--------|
| 65 | -0.000 | -0.001 | 0.000 | -0.001 |
| 66 | -0.000 | -0.001 | 0.000 | -0.001 |
| 67 | 0.000  | 0.006  | 0.000 | 0.006  |
| 68 | 0.000  | 0.003  | 0.000 | 0.003  |
| 69 | 0.000  | 0.001  | 0.000 | 0.001  |
| 70 | 0.000  | 0.002  | 0.000 | 0.002  |
| 71 | -0.000 | -0.005 | 0.000 | -0.006 |
| 72 | -0.000 | -0.007 | 0.000 | -0.007 |
| 73 | -0.000 | -0.001 | 0.000 | -0.001 |
| 74 | -0.000 | -0.002 | 0.000 | -0.002 |
| 75 | 0.000  | 0.006  | 0.000 | 0.007  |
| 76 | 0.000  | 0.003  | 0.000 | 0.004  |
| 77 | 0.000  | 0.003  | 0.000 | 0.003  |
| 78 | 0.000  | 0.001  | 0.000 | 0.001  |
| 79 | -0.000 | -0.005 | 0.000 | -0.006 |
| 80 | -0.000 | -0.007 | 0.000 | -0.007 |
| 81 | -0.000 | -0.001 | 0.000 | -0.002 |
| 82 | -0.000 | -0.002 | 0.000 | -0.002 |
| 83 | 0.001  | 0.007  | 0.000 | 0.008  |
| 84 | 0.000  | 0.003  | 0.000 | 0.003  |
| 85 | 0.000  | 0.002  | 0.000 | 0.002  |
| 86 | 0.000  | 0.005  | 0.000 | 0.006  |

|     |        |        |       |        |
|-----|--------|--------|-------|--------|
| 87  | -0.000 | -0.005 | 0.000 | -0.005 |
| 88  | -0.000 | -0.007 | 0.000 | -0.007 |
| 89  | -0.000 | -0.001 | 0.000 | -0.002 |
| 90  | -0.000 | -0.002 | 0.000 | -0.002 |
| 91  | 0.001  | 0.008  | 0.000 | 0.008  |
| 92  | 0.000  | 0.003  | 0.000 | 0.003  |
| 93  | 0.000  | 0.002  | 0.000 | 0.003  |
| 94  | 0.000  | 0.001  | 0.000 | 0.001  |
| 95  | -0.000 | -0.005 | 0.000 | -0.006 |
| 96  | -0.000 | -0.007 | 0.000 | -0.007 |
| 97  | -0.000 | -0.001 | 0.000 | -0.001 |
| 98  | -0.000 | -0.001 | 0.000 | -0.001 |
| 99  | 0.001  | 0.007  | 0.000 | 0.007  |
| 100 | 0.000  | 0.003  | 0.000 | 0.004  |
| 101 | 0.000  | 0.003  | 0.000 | 0.003  |
| 102 | 0.000  | 0.002  | 0.000 | 0.002  |
| 103 | -0.001 | -0.010 | 0.000 | -0.011 |
| 104 | -0.003 | -0.028 | 0.000 | -0.031 |
| 105 | -0.000 | -0.001 | 0.000 | -0.002 |
| 106 | -0.000 | -0.004 | 0.000 | -0.005 |
| 107 | 0.007  | 0.116  | 0.000 | 0.122  |
| 108 | 0.001  | 0.010  | 0.000 | 0.011  |

|     |        |        |       |        |
|-----|--------|--------|-------|--------|
| 109 | 0.000  | 0.001  | 0.000 | 0.001  |
| 110 | -0.001 | -0.010 | 0.000 | -0.011 |
| 111 | -0.003 | -0.028 | 0.000 | -0.031 |
| 112 | -0.000 | -0.001 | 0.000 | -0.002 |
| 113 | -0.000 | -0.004 | 0.000 | -0.004 |
| 114 | 0.007  | 0.120  | 0.000 | 0.127  |
| 115 | 0.001  | 0.010  | 0.000 | 0.011  |
| 116 | 0.000  | 0.001  | 0.000 | 0.002  |
| 117 | -0.001 | -0.010 | 0.000 | -0.011 |
| 118 | -0.003 | -0.026 | 0.000 | -0.029 |
| 119 | -0.000 | -0.002 | 0.000 | -0.002 |
| 120 | -0.000 | -0.002 | 0.000 | -0.002 |
| 121 | 0.007  | 0.115  | 0.000 | 0.122  |
| 122 | 0.001  | 0.010  | 0.000 | 0.010  |
| 123 | 0.000  | 0.003  | 0.000 | 0.003  |
| 124 | -0.001 | -0.010 | 0.000 | -0.011 |
| 125 | -0.003 | -0.024 | 0.000 | -0.027 |
| 126 | -0.000 | -0.002 | 0.000 | -0.002 |
| 127 | -0.000 | 0.001  | 0.000 | 0.001  |
| 128 | 0.006  | 0.105  | 0.000 | 0.111  |
| 129 | 0.001  | 0.009  | 0.000 | 0.010  |
| 130 | 0.000  | 0.004  | 0.000 | 0.004  |

|     |        |        |        |        |
|-----|--------|--------|--------|--------|
| 131 | -0.001 | -0.009 | 0.000  | -0.010 |
| 132 | -0.003 | -0.024 | 0.000  | -0.027 |
| 133 | -0.000 | -0.002 | 0.000  | -0.002 |
| 134 | -0.000 | -0.002 | 0.000  | -0.002 |
| 135 | 0.006  | 0.097  | 0.000  | 0.102  |
| 136 | 0.001  | 0.009  | 0.000  | 0.010  |
| 137 | 0.000  | 0.004  | 0.000  | 0.005  |
| 138 | -0.001 | -0.010 | 0.000  | -0.011 |
| 139 | -0.003 | -0.026 | 0.000  | -0.029 |
| 140 | -0.000 | -0.002 | 0.000  | -0.002 |
| 141 | -0.000 | -0.004 | 0.000  | -0.004 |
| 142 | 0.006  | 0.105  | 0.000  | 0.111  |
| 143 | 0.001  | 0.010  | 0.000  | 0.010  |
| 144 | 0.000  | 0.002  | 0.000  | 0.003  |
| 145 | 0.000  | 0.005  | 0.000  | 0.006  |
| 146 | -0.000 | 0.000  | -0.000 | 0.000  |
| 147 | 0.000  | 0.004  | 0.000  | 0.004  |

-----

|     |       |       |        |       |
|-----|-------|-------|--------|-------|
| tot | 0.001 | 0.513 | -0.000 | 0.514 |
|-----|-------|-------|--------|-------|

CHARGE:  cpu time      0.5247: real time      0.5264

FORLOC:  cpu time      0.0201: real time      0.0202

FORNL : cpu time 2.0355: real time 2.0424  
 STRESS: cpu time 6.0931: real time 6.1112  
 FORCOR: cpu time 0.1397: real time 0.1411  
 FORHAR: cpu time 0.0330: real time 0.0331  
 MIXING: cpu time 0.0110: real time 0.0110  
 OFIELD: cpu time 0.0001: real time 0.0001

-----

DFTD3 V3.0 Rev 1

Edisp (eV) -6.61787

E6 (eV): -3.9313

E8 (eV): -2.6866

% E8 : 40.60

FORVDW: cpu time 1.8081: real time 1.8617

FORCE on cell =-STRESS in cart. coord. units (eV):

|           |    |    |    |    |    |    |
|-----------|----|----|----|----|----|----|
| Direction | XX | YY | ZZ | XY | YZ | ZX |
|-----------|----|----|----|----|----|----|

-----

Alpha Z 233.50077 233.50077 233.50077

Ewald 107585.35095 23473.21104-39725.69125 9.21379 3454.78175 127.91527

|                     |              |              |                 |          |             |            |
|---------------------|--------------|--------------|-----------------|----------|-------------|------------|
| Hartree             | 106100.65844 | 25029.44834  | -23791.84042    | -6.89135 | 2948.41163  | 93.05998   |
| E(xc)               | -1914.21418  | -1916.56476  | -1979.88100     | 0.13125  | 1.81975     | 0.12858    |
| Local               | *****        | -53951.37111 | 57011.06869     | 0.96144  | -6361.41937 | -217.63314 |
| n-local             | -472.60200   | -482.40630   | -439.44480      | -0.66324 | -0.57896    | -0.30682   |
| augment             | -38.31184    | -38.60666    | -34.29964       | 0.01205  | -0.97420    | 0.00359    |
| Kinetic             | 7634.95511   | 7638.80904   | 8713.98116      | -3.07602 | -41.68506   | -3.17520   |
| Fock                | 0.00000      | 0.00000      | 0.00000         | 0.00000  | 0.00000     | 0.00000    |
| vdW                 | -2.64013     | -1.48994     | -6.59298        | 0.00104  | -0.07386    | 0.01157    |
| -----               |              |              |                 |          |             |            |
| Total               | -17.74616    | -15.46958    | -19.19948       | -0.31103 | 0.28168     | 0.00384    |
| in kB               | -4.89360     | -4.26582     | -5.29436        | -0.08577 | 0.07768     | 0.00106    |
| external pressure = |              | -4.82 kB     | Pullay stress = |          | 0.00 kB     |            |

VOLUME and BASIS-vectors are now :

-----

energy-cutoff : 400.00

volume of cell : 5810.14

| direct lattice vectors |             |             | reciprocal lattice vectors |             |             |
|------------------------|-------------|-------------|----------------------------|-------------|-------------|
| 14.78060000            | 0.00000000  | 0.00000000  | 0.067656252                | 0.00000000  | 0.00000000  |
| 0.00000000             | 21.33390000 | 0.00000000  | 0.00000000                 | 0.046873755 | 0.00000000  |
| 0.00000000             | 0.00000000  | 18.42570000 | 0.00000000                 | 0.00000000  | 0.054272022 |

length of vectors

14.780600000 21.333900000 18.425700000 0.067656252 0.046873755 0.054272022

FORCES acting on ions

electron-ion (+dipol)

ewald-force

non-local-force

convergence-correction

-----

|           |           |           |           |           |           |           |           |   |
|-----------|-----------|-----------|-----------|-----------|-----------|-----------|-----------|---|
| 0.465E-02 | 0.154E+03 | 0.361E+02 | -.316E-02 | -.160E+03 | -.357E+02 | -.179E-02 | 0.566E+01 | - |
| .438E+00  | -.100E-06 | -.446E-06 | -.925E-06 |           |           |           |           |   |
| -.185E-01 | 0.155E+03 | -.340E+02 | 0.160E-01 | -.160E+03 | 0.335E+02 | 0.116E-02 | 0.565E+01 |   |
| 0.541E+00 | 0.533E-06 | 0.337E-06 | 0.580E-07 |           |           |           |           |   |
| 0.184E+00 | 0.154E+03 | 0.360E+02 | -.184E+00 | -.160E+03 | -.356E+02 | 0.393E-05 | 0.565E+01 | - |
| .443E+00  | 0.285E-06 | -.638E-06 | -.666E-06 |           |           |           |           |   |
| 0.112E+00 | 0.155E+03 | -.341E+02 | -.987E-01 | -.160E+03 | 0.336E+02 | -.175E-01 | 0.565E+01 |   |
| 0.535E+00 | 0.175E-06 | 0.329E-07 | 0.298E-06 |           |           |           |           |   |
| 0.171E+00 | 0.154E+03 | 0.362E+02 | -.173E+00 | -.160E+03 | -.357E+02 | 0.115E-02 | 0.566E+01 | - |
| .440E+00  | 0.383E-06 | -.816E-06 | -.822E-06 |           |           |           |           |   |
| 0.126E+00 | 0.154E+03 | -.340E+02 | -.108E+00 | -.160E+03 | 0.334E+02 | -.211E-01 | 0.565E+01 |   |
| 0.541E+00 | -.385E-06 | -.256E-06 | -.409E-06 |           |           |           |           |   |
| -.193E-01 | 0.154E+03 | 0.363E+02 | 0.182E-01 | -.160E+03 | -.359E+02 | 0.158E-02 | 0.566E+01 | - |

.431E+00 0.142E-06 -.807E-06 -.126E-05  
-.129E-01 0.154E+03 -.338E+02 0.198E-01 -.160E+03 0.332E+02 -.721E-02 0.565E+01  
0.555E+00 -.493E-06 -.191E-06 -.137E-05  
-.182E+00 0.154E+03 0.363E+02 0.182E+00 -.160E+03 -.359E+02 0.259E-03 0.566E+01 -  
.429E+00 -.273E-06 -.611E-06 -.148E-05  
-.128E+00 0.155E+03 -.337E+02 0.115E+00 -.160E+03 0.331E+02 0.109E-01 0.565E+01  
0.561E+00 -.114E-06 0.253E-06 -.162E-05  
-.174E+00 0.154E+03 0.362E+02 0.176E+00 -.160E+03 -.358E+02 -.176E-02 0.566E+01 -  
.432E+00 -.437E-06 -.444E-06 -.131E-05  
-.115E+00 0.155E+03 -.338E+02 0.956E-01 -.160E+03 0.332E+02 0.192E-01 0.565E+01  
0.555E+00 0.283E-06 0.454E-06 -.893E-06  
0.228E+01 -.150E+03 -.386E+02 -.227E+01 0.156E+03 0.386E+02 -.103E-01 -.566E+01  
0.766E-01 -.405E-06 0.570E-06 -.182E-06  
-.416E+00 -.151E+03 0.388E+02 0.417E+00 0.157E+03 -.386E+02 -.125E-02 -.567E+01 -  
.269E+00 0.317E-06 0.875E-06 -.130E-07  
0.136E+02 -.146E+03 -.413E+02 -.138E+02 0.151E+03 0.413E+02 0.256E+00 -.567E+01 -  
.350E-01 0.294E-06 0.400E-06 -.205E-06  
0.162E+01 -.151E+03 0.402E+02 -.162E+01 0.156E+03 -.400E+02 -.102E-02 -.567E+01 -  
.229E+00 -.284E-06 0.560E-06 -.677E-06  
0.352E+01 -.149E+03 0.443E+02 -.352E+01 0.155E+03 -.441E+02 -.210E-02 -.567E+01 -  
.180E+00 -.413E-06 0.417E-06 -.310E-06  
-.148E+02 -.146E+03 -.330E+02 0.149E+02 0.151E+03 0.329E+02 -.936E-01 -.566E+01

0.472E-01 - .542E-06 0.603E-06 -.288E-06  
-.297E+01 -.149E+03 0.432E+02 0.296E+01 0.155E+03 -.430E+02 0.115E-01 -.567E+01 -  
.241E+00 0.723E-07 0.694E-06 0.106E-05  
-.379E+01 -.150E+03 -.385E+02 0.379E+01 0.156E+03 0.385E+02 -.592E-02 -.566E+01  
0.237E-01 0.214E-06 0.556E-06 -.464E-06  
-.207E+01 -.151E+03 0.395E+02 0.207E+01 0.156E+03 -.392E+02 0.156E-02 -.566E+01 -  
.282E+00 0.696E-06 0.862E-06 0.664E-06  
0.173E-02 -.148E+03 0.486E+02 0.589E-02 0.154E+03 -.484E+02 -.551E-02 -.570E+01 -  
.158E+00 -.446E-06 0.583E-06 0.812E-06  
0.196E+02 -.103E+03 0.222E+02 -.212E+02 0.103E+03 -.246E+02 0.153E+01 0.137E+00  
0.238E+01 0.491E-06 0.646E-06 -.155E-06  
-.192E+02 -.103E+03 0.153E+02 0.216E+02 0.103E+03 -.168E+02 -.242E+01 -.121E+00  
0.151E+01 -.529E-07 0.574E-06 0.214E-06  
0.711E-01 0.461E+03 0.202E+03 -.744E-01 -.462E+03 -.201E+03 0.385E-02 0.102E+01 -  
.219E+00 -.687E-06 -.273E-06 -.238E-05  
0.212E+00 0.353E+03 -.234E+03 -.212E+00 -.353E+03 0.234E+03 0.260E-02 0.444E+00 -  
.371E-01 0.836E-06 0.167E-06 0.266E-05  
-.254E-01 0.351E+03 0.240E+03 0.240E-01 -.351E+03 -.241E+03 0.319E-02 0.408E+00  
0.565E-01 -.134E-05 0.179E-06 -.265E-05  
-.173E+00 0.462E+03 -.195E+03 0.180E+00 -.463E+03 0.195E+03 -.659E-02 0.105E+01  
0.233E+00 0.162E-05 0.206E-05 0.153E-05  
-.622E-01 0.210E+03 -.272E+03 0.664E-01 -.210E+03 0.272E+03 -.449E-02 0.947E-01

0.560E-01 0.403E-06 -.616E-06 0.218E-05  
0.562E+00 0.461E+03 0.202E+03 -.565E+00 -.462E+03 -.201E+03 0.199E-02 0.102E+01 -  
.214E+00 0.798E-06 -.850E-06 -.151E-05  
0.106E+01 0.352E+03 -.234E+03 -.107E+01 -.353E+03 0.234E+03 0.159E-01 0.449E+00 -  
.425E-01 -.683E-06 0.317E-08 0.161E-05  
0.413E+00 0.351E+03 0.240E+03 -.415E+00 -.351E+03 -.240E+03 0.302E-02 0.408E+00  
0.493E-01 -.512E-07 0.161E-07 -.105E-05  
0.579E+00 0.462E+03 -.195E+03 -.584E+00 -.463E+03 0.195E+03 0.475E-02 0.105E+01  
0.235E+00 0.178E-06 0.758E-06 0.229E-05  
0.692E+00 0.210E+03 -.272E+03 -.698E+00 -.210E+03 0.272E+03 0.586E-02 0.923E-01  
0.616E-01 -.389E-06 -.249E-06 0.152E-05  
0.426E+00 0.461E+03 0.202E+03 -.429E+00 -.462E+03 -.202E+03 0.380E-02 0.102E+01 -  
.213E+00 0.143E-05 -.135E-05 -.274E-05  
0.940E+00 0.352E+03 -.233E+03 -.956E+00 -.352E+03 0.233E+03 0.150E-01 0.442E+00 -  
.378E-01 -.167E-05 0.103E-05 -.151E-05  
0.479E+00 0.351E+03 0.241E+03 -.481E+00 -.351E+03 -.241E+03 0.246E-02 0.406E+00  
0.514E-01 0.123E-05 -.456E-06 -.135E-05  
0.705E+00 0.462E+03 -.194E+03 -.716E+00 -.463E+03 0.194E+03 0.773E-02 0.106E+01  
0.242E+00 -.177E-05 0.924E-06 -.423E-06  
0.728E+00 0.210E+03 -.271E+03 -.737E+00 -.210E+03 0.271E+03 0.634E-02 0.920E-01  
0.592E-01 -.945E-06 0.138E-05 -.289E-06  
-.181E+00 0.461E+03 0.202E+03 0.178E+00 -.462E+03 -.202E+03 0.447E-02 0.102E+01 -

.218E+00 0.766E-06 -.150E-05 -.483E-05  
-.294E+00 0.352E+03 -.233E+03 0.298E+00 -.352E+03 0.233E+03 -.205E-02 0.441E+00 -  
.300E-01 -.281E-06 0.270E-05 -.354E-05  
0.409E-01 0.351E+03 0.241E+03 -.399E-01 -.351E+03 -.241E+03 0.219E-02 0.410E+00  
0.559E-01 0.125E-05 -.835E-06 -.348E-05  
0.503E-01 0.462E+03 -.194E+03 -.565E-01 -.463E+03 0.194E+03 0.387E-02 0.106E+01  
0.232E+00 -.136E-05 0.218E-05 -.386E-05  
-.476E-01 0.210E+03 -.271E+03 0.456E-01 -.210E+03 0.271E+03 -.194E-03 0.941E-01  
0.323E-01 -.406E-07 0.245E-05 -.139E-05  
-.552E+00 0.461E+03 0.202E+03 0.550E+00 -.462E+03 -.202E+03 0.793E-03 0.102E+01 -  
.219E+00 -.722E-06 -.960E-06 -.557E-05  
-.119E+01 0.352E+03 -.233E+03 0.120E+01 -.353E+03 0.233E+03 -.161E-01 0.449E+00 -  
.331E-01 0.647E-06 0.226E-05 -.268E-05  
-.352E+00 0.351E+03 0.241E+03 0.349E+00 -.351E+03 -.241E+03 0.207E-02 0.414E+00  
0.625E-01 0.234E-06 -.807E-06 -.505E-05  
-.412E+00 0.462E+03 -.194E+03 0.426E+00 -.463E+03 0.194E+03 -.114E-01 0.106E+01  
0.230E+00 0.456E-07 0.335E-05 -.470E-05  
-.564E+00 0.210E+03 -.271E+03 0.568E+00 -.210E+03 0.271E+03 -.922E-02 0.925E-01  
0.525E-01 0.421E-06 0.241E-05 -.825E-06  
-.475E+00 0.461E+03 0.202E+03 0.474E+00 -.462E+03 -.202E+03 0.312E-02 0.102E+01 -  
.220E+00 -.159E-05 -.335E-06 -.438E-05  
-.806E+00 0.353E+03 -.234E+03 0.821E+00 -.353E+03 0.234E+03 -.149E-01 0.448E+00 -

.393E-01 0.113E-05 0.141E-05 0.441E-06  
-.374E+00 0.351E+03 0.241E+03 0.368E+00 -.351E+03 -.241E+03 0.101E-02 0.411E+00  
0.628E-01 -.131E-05 -.299E-06 -.465E-05  
-.595E+00 0.462E+03 -.194E+03 0.608E+00 -.463E+03 0.194E+03 -.169E-01 0.106E+01  
0.234E+00 0.131E-05 0.334E-05 -.200E-05  
-.590E+00 0.210E+03 -.272E+03 0.601E+00 -.210E+03 0.272E+03 -.101E-01 0.100E+00  
0.567E-01 0.525E-06 0.718E-06 0.909E-06  
-.101E-01 0.206E+03 0.279E+03 0.134E-01 -.206E+03 -.279E+03 -.358E-02 0.692E-01 -  
.410E-01 -.114E-05 0.377E-06 -.163E-05  
0.667E+00 0.303E+02 0.296E+03 -.662E+00 -.302E+02 -.296E+03 -.467E-02 -.406E-01  
0.781E-02 -.421E-06 0.128E-05 -.106E-05  
-.848E+00 0.144E+03 -.282E+03 0.850E+00 -.144E+03 0.282E+03 -.314E-02 0.138E+00  
0.286E-01 0.218E-06 -.280E-06 0.130E-05  
0.534E+00 -.215E+02 -.285E+03 -.534E+00 0.214E+02 0.285E+03 -.786E-03 0.399E-01  
0.186E-01 0.317E-07 0.576E-06 -.544E-06  
0.496E+00 -.294E+02 0.293E+03 -.493E+00 0.294E+02 -.293E+03 -.551E-02 0.258E-01 -  
.301E-01 -.558E-07 0.105E-05 -.111E-05  
0.523E+00 0.139E+03 0.289E+03 -.523E+00 -.139E+03 -.289E+03 0.180E-02 0.104E+00 -  
.246E-01 -.724E-06 0.823E-06 -.750E-06  
-.127E+01 0.364E+02 -.287E+03 0.127E+01 -.364E+02 0.287E+03 0.695E-04 -.640E-02  
0.136E-01 -.719E-06 0.256E-06 0.926E-07  
0.167E+01 -.130E+03 -.271E+03 -.169E+01 0.130E+03 0.271E+03 0.105E-01 -.870E-01

0.370E-01 - .165E-06 0.115E-05 -.117E-05  
0.397E+00 0.207E+03 0.280E+03 -.395E+00 -.207E+03 -.280E+03 0.697E-03 0.700E-01 -  
.368E-01 -.284E-06 0.679E-06 -.385E-06  
0.921E+00 0.312E+02 0.296E+03 -.924E+00 -.311E+02 -.296E+03 0.219E-02 -.407E-01  
0.125E-01 0.301E-08 0.138E-05 -.745E-06  
0.133E+01 0.144E+03 -.282E+03 -.133E+01 -.144E+03 0.282E+03 0.491E-02 0.127E+00  
0.279E-01 0.272E-06 -.716E-06 0.152E-05  
0.343E+01 -.199E+02 -.285E+03 -.344E+01 0.199E+02 0.285E+03 0.131E-01 0.424E-01  
0.135E-01 0.123E-05 0.767E-06 -.171E-06  
0.139E+01 -.287E+02 0.294E+03 -.139E+01 0.287E+02 -.294E+03 -.351E-02 0.256E-01 -  
.304E-01 -.226E-06 0.176E-05 -.137E-05  
0.679E+00 0.139E+03 0.290E+03 -.679E+00 -.139E+03 -.290E+03 0.579E-03 0.104E+00 -  
.293E-01 0.251E-06 0.843E-06 -.241E-06  
0.160E+01 0.367E+02 -.287E+03 -.159E+01 -.367E+02 0.287E+03 -.131E-01 -.194E-01  
0.127E-01 0.768E-06 0.129E-07 0.737E-07  
0.613E+01 -.125E+03 -.271E+03 -.615E+01 0.125E+03 0.271E+03 0.213E-01 -.886E-01  
0.147E-01 0.108E-05 0.915E-06 -.462E-06  
0.368E+00 0.207E+03 0.280E+03 -.373E+00 -.207E+03 -.280E+03 0.607E-04 0.689E-01 -  
.363E-01 0.980E-06 0.209E-06 -.658E-06  
-.344E-01 0.319E+02 0.296E+03 0.258E-01 -.319E+02 -.296E+03 0.105E-01 -.359E-01  
0.142E-01 0.386E-06 0.355E-06 -.538E-06  
0.210E+01 0.144E+03 -.281E+03 -.211E+01 -.144E+03 0.281E+03 0.119E-01 0.121E+00

0.239E-01 - .389E-06 0.101E-05 0.622E-06  
0.305E+01 -.171E+02 -.283E+03 -.307E+01 0.170E+02 0.283E+03 0.240E-01 0.878E-01

0.600E-01 0.953E-06 0.196E-05 0.541E-06  
0.106E+01 -.272E+02 0.294E+03 -.106E+01 0.272E+02 -.294E+03 0.281E-02 0.246E-01 -

.373E-01 -.150E-06 0.118E-05 -.780E-06  
0.985E-01 0.140E+03 0.290E+03 -.100E+00 -.140E+03 -.290E+03 0.125E-02 0.108E+00 -

.230E-01 0.966E-06 0.623E-07 -.107E-05  
0.278E+01 0.387E+02 -.286E+03 -.278E+01 -.387E+02 0.286E+03 0.777E-03 -.101E-01

0.291E-01 0.552E-06 0.102E-05 0.293E-06  
0.599E+01 -.115E+03 -.267E+03 -.615E+01 0.115E+03 0.267E+03 0.153E+00 0.195E-02

0.128E+00 0.196E-05 -.942E-06 0.689E-06  
-.241E+00 0.207E+03 0.280E+03 0.239E+00 -.207E+03 -.280E+03 0.436E-02 0.722E-01 -

.385E-01 0.109E-05 -.472E-06 -.243E-05  
-.114E+01 0.314E+02 0.294E+03 0.113E+01 -.314E+02 -.294E+03 0.920E-02 -.308E-01

0.569E-02 0.401E-06 -.690E-06 -.688E-06  
0.597E+00 0.144E+03 -.281E+03 -.615E+00 -.144E+03 0.281E+03 0.176E-01 0.127E+00

0.437E-01 0.289E-06 0.191E-05 -.389E-06  
-.939E+00 -.158E+02 -.286E+03 0.931E+00 0.158E+02 0.285E+03 0.609E-02 0.918E-01

0.798E-01 0.672E-06 0.443E-05 0.100E-05  
-.639E+00 -.265E+02 0.293E+03 0.636E+00 0.265E+02 -.293E+03 0.490E-02 0.237E-01 -

.268E-01 0.478E-08 -.210E-06 -.438E-07  
-.533E+00 0.139E+03 0.289E+03 0.529E+00 -.139E+03 -.289E+03 0.657E-02 0.114E+00 -

.211E-01 0.730E-06 -.693E-06 -.246E-05  
0.785E+00 0.408E+02 -.287E+03 -.797E+00 -.408E+02 0.287E+03 0.494E-02 0.253E-02 -

.193E-01 0.673E-06 0.310E-05 0.563E-06  
-.457E+00 -.113E+03 -.276E+03 0.423E+00 0.113E+03 0.276E+03 0.354E-01 0.608E-01 -

.269E+00 0.114E-06 0.116E-05 0.113E-05  
-.572E+00 0.206E+03 0.279E+03 0.570E+00 -.206E+03 -.279E+03 0.117E-02 0.726E-01 -

.453E-01 0.301E-06 -.784E-06 -.368E-05  
-.785E+00 0.304E+02 0.294E+03 0.789E+00 -.304E+02 -.294E+03 -.751E-02 -.305E-01 -

.113E-02 0.332E-07 -.770E-06 -.918E-06  
-.123E+01 0.144E+03 -.281E+03 0.125E+01 -.145E+03 0.281E+03 -.155E-01 0.123E+00

0.504E-01 -.299E-06 0.277E-05 -.542E-06  
-.367E+01 -.174E+02 -.283E+03 0.370E+01 0.173E+02 0.283E+03 -.306E-01 0.118E+00

0.579E-01 -.133E-05 0.235E-05 0.575E-06  
-.130E+01 -.277E+02 0.291E+03 0.129E+01 0.277E+02 -.291E+03 -.128E-02 0.344E-01 -

.216E-01 0.241E-06 -.928E-06 0.213E-06  
-.349E+00 0.139E+03 0.289E+03 0.348E+00 -.139E+03 -.289E+03 0.350E-04 0.112E+00 -

.144E-01 -.228E-06 -.727E-06 -.285E-05  
-.836E+00 0.400E+02 -.287E+03 0.828E+00 -.400E+02 0.287E+03 0.130E-01 -.696E-02 -

.185E-01 -.339E-06 0.332E-05 0.515E-06  
-.790E+01 -.119E+03 -.267E+03 0.809E+01 0.119E+03 0.267E+03 -.190E+00 0.470E-02

0.324E-01 -.151E-05 -.112E-05 0.496E-06  
-.410E+00 0.206E+03 0.279E+03 0.412E+00 -.206E+03 -.279E+03 -.276E-02 0.721E-01 -

.462E-01    -.924E-06 -.410E-06 -.331E-05  
              -.667E-01 0.300E+02 0.294E+03    0.764E-01 -.299E+02 -.294E+03    -.943E-02 -.344E-01  
0.151E-02    -.409E-06 0.252E-06 -.106E-05  
              -.206E+01 0.145E+03 -.282E+03    0.208E+01 -.145E+03 0.282E+03    -.188E-01 0.133E+00  
0.256E-01    -.690E-07 0.193E-05 0.298E-06  
              -.258E+01 -.208E+02 -.285E+03    0.260E+01 0.208E+02 0.285E+03    -.287E-01 0.420E-01  
0.315E-01    -.160E-05 0.119E-05 -.158E-06  
              -.556E+00 -.290E+02 0.291E+03    0.561E+00 0.290E+02 -.291E+03    -.281E-02 0.295E-01 -  
.248E-01    0.176E-06 -.385E-06 -.343E-06  
              0.569E-01 0.139E+03 0.289E+03    -.571E-01 -.139E+03 -.289E+03    -.302E-03 0.109E+00 -  
.206E-01    -.101E-05 0.342E-07 -.198E-05  
              -.291E+01 0.378E+02 -.286E+03    0.292E+01 -.378E+02 0.286E+03    -.145E-01 -.276E-02  
0.207E-01    -.917E-06 0.156E-05 0.287E-06  
              -.515E+01 -.128E+03 -.271E+03    0.520E+01 0.128E+03 0.271E+03    -.460E-01 -.852E-01  
0.377E-01    -.155E-05 0.114E-05 -.438E-06  
              0.395E+00 -.137E+03 0.280E+03    -.387E+00 0.137E+03 -.280E+03    -.963E-02 -.127E+00 -  
.152E-01    0.620E-06 0.862E-06 -.116E-05  
              0.193E+01 -.343E+03 0.233E+03    -.194E+01 0.344E+03 -.233E+03    0.916E-02 -.460E+00 -  
.540E-01    0.699E-06 0.147E-05 -.224E-05  
              -.254E+01 -.197E+03 -.259E+03    0.255E+01 0.197E+03 0.259E+03    -.962E-02 -.196E+00  
0.368E-01    -.118E-05 0.984E-06 -.993E-06  
              0.691E+01 -.447E+03 -.198E+03    -.693E+01 0.448E+03 0.198E+03    0.926E-02 -.112E+01

0.878E-01    -.104E-05 0.493E-06 -.674E-06  
              -.467E+00 -.451E+03 0.204E+03    0.468E+00 0.452E+03 -.204E+03    -.185E-02 -.108E+01 -  
.112E+00    0.148E-05 0.245E-05 -.597E-06  
              0.171E+01 -.203E+03 0.269E+03    -.170E+01 0.203E+03 -.269E+03    -.478E-02 -.922E-01 -  
.315E-01    0.436E-06 0.143E-05 -.212E-05  
              -.211E+01 -.338E+03 -.222E+03    0.216E+01 0.338E+03 0.222E+03    -.444E-01 -.602E+00  
0.533E-01    -.758E-06 0.366E-06 -.709E-06  
              0.218E+01 -.136E+03 0.282E+03    -.218E+01 0.136E+03 -.282E+03    -.641E-02 -.125E+00 -  
.898E-02    -.190E-06 0.158E-05 -.223E-05  
              0.672E+01 -.339E+03 0.238E+03    -.670E+01 0.340E+03 -.238E+03    -.130E-01 -.461E+00 -  
.453E-01    -.105E-05 0.107E-05 -.266E-05  
              0.679E+01 -.193E+03 -.258E+03    -.680E+01 0.193E+03 0.258E+03    0.111E-01 -.144E+00  
0.631E-01    0.855E-06 0.637E-06 -.950E-06  
              0.313E+02 -.427E+03 -.198E+03    -.313E+02 0.428E+03 0.197E+03    0.727E-01 -.975E+00  
0.140E+00    0.127E-05 -.606E-06 -.354E-06  
              0.544E+01 -.449E+03 0.209E+03    -.544E+01 0.451E+03 -.209E+03    0.514E-03 -.108E+01 -  
.793E-01    -.583E-06 0.186E-05 -.296E-05  
              0.369E+01 -.201E+03 0.272E+03    -.368E+01 0.201E+03 -.272E+03    -.845E-03 -.973E-01 -  
.301E-01    -.745E-06 0.140E-05 -.220E-05  
              0.124E+02 -.332E+03 -.223E+03    -.125E+02 0.332E+03 0.223E+03    0.121E+00 -.533E+00  
0.313E-01    0.177E-06 -.434E-06 -.557E-06  
              0.219E+01 -.133E+03 0.283E+03    -.220E+01 0.133E+03 -.283E+03    0.410E-03 -.128E+00 -

.403E-02    -.755E-06 0.964E-06 -.111E-05  
0.493E+01 -.332E+03 0.245E+03    -.490E+01 0.332E+03 -.245E+03    -.322E-01 -.476E+00 -  
.370E-01    -.184E-05 0.529E-06 0.502E-06  
0.113E+02 -.182E+03 -.258E+03    -.113E+02 0.182E+03 0.258E+03    0.468E-01 -.985E-01 -  
.105E+00    -.100E-06 0.200E-06 0.360E-07  
0.319E+02 -.399E+03 -.175E+03    -.322E+02 0.401E+03 0.174E+03    0.302E+00 -.144E+01  
0.132E+01    -.242E-05 0.413E-05 -.804E-06  
0.930E+01 -.443E+03 0.219E+03    -.930E+01 0.444E+03 -.219E+03    -.611E-02 -.110E+01 -  
.481E-01    -.167E-05 0.983E-06 -.139E-05  
0.170E+01 -.196E+03 0.273E+03    -.170E+01 0.197E+03 -.273E+03    0.537E-02 -.109E+00 -  
.506E-01    -.134E-05 0.282E-06 0.907E-07  
0.172E+02 -.310E+03 -.216E+03    -.176E+02 0.310E+03 0.216E+03    0.325E+00 -.219E+00  
0.122E+00    -.733E-06 -.323E-06 -.420E-06  
-.103E+01 -.132E+03 0.281E+03    0.102E+01 0.132E+03 -.281E+03    0.102E-01 -.127E+00  
0.524E-03    -.709E-06 -.422E-06 0.967E-06  
-.512E+01 -.332E+03 0.239E+03    0.511E+01 0.332E+03 -.239E+03    0.905E-02 -.495E+00 -  
.412E-01    -.953E-06 -.278E-06 0.343E-05  
0.164E+01 -.169E+03 -.261E+03    -.177E+01 0.169E+03 0.261E+03    0.119E+00 0.369E+00 -  
.885E-01    0.510E-05 -.454E-05 0.107E-05  
-.637E+01 -.300E+03 -.187E+03    0.586E+01 0.294E+03 0.183E+03    0.479E+00 0.472E+01  
0.408E+01    0.152E-05 0.519E-05 0.249E-05  
-.617E+00 -.436E+03 0.227E+03    0.615E+00 0.437E+03 -.227E+03    0.168E-02 -.120E+01 -

.483E-01    -.182E-05 0.784E-06 0.267E-05  
              -.302E+01 -.197E+03 0.268E+03    0.300E+01 0.197E+03 -.268E+03    0.147E-01 -.112E+00 -  
.424E-01    -.438E-06 -.868E-06 0.241E-05  
              0.357E+01 -.280E+03 -.215E+03    -.554E+01 0.280E+03 0.214E+03    0.192E+01 0.634E+00  
0.816E+00    0.898E-05 0.135E-05 0.146E-05  
              -.274E+01 -.134E+03 0.277E+03    0.274E+01 0.134E+03 -.277E+03    0.255E-02 -.123E+00 -  
.181E-01    0.142E-06 -.112E-05 0.212E-05  
              -.601E+01 -.338E+03 0.230E+03    0.601E+01 0.339E+03 -.230E+03    0.113E-01 -.494E+00 -  
.452E-01    0.991E-06 -.267E-06 0.337E-05  
              -.656E+01 -.171E+03 -.257E+03    0.664E+01 0.170E+03 0.257E+03    -.790E-01 0.484E+00  
0.232E-01    -.452E-05 -.335E-05 0.871E-06  
              -.444E+02 -.422E+03 -.184E+03    0.449E+02 0.424E+03 0.183E+03    -.569E+00 -.112E+01  
0.613E+00    0.588E-06 0.354E-05 -.695E-06  
              -.867E+01 -.441E+03 0.211E+03    0.866E+01 0.443E+03 -.211E+03    0.146E-01 -.112E+01 -  
.743E-01    0.750E-07 0.278E-06 0.417E-05  
              -.293E+01 -.201E+03 0.265E+03    0.294E+01 0.201E+03 -.265E+03    -.912E-02 -.110E+00 -  
.200E-01    0.651E-06 -.995E-06 0.241E-05  
              -.147E+02 -.290E+03 -.209E+03    0.168E+02 0.289E+03 0.208E+03    -.198E+01 0.601E+00  
0.787E+00    -.907E-05 0.130E-05 0.115E-05  
              -.139E+01 -.136E+03 0.277E+03    0.140E+01 0.136E+03 -.277E+03    -.101E-01 -.125E+00 -  
.235E-01    0.847E-06 -.580E-06 0.916E-06  
              -.280E+01 -.343E+03 0.230E+03    0.277E+01 0.343E+03 -.230E+03    0.237E-01 -.473E+00 -

.585E-01 0.201E-05 0.969E-06 0.758E-06  
 -.104E+02 -.189E+03 -.258E+03 0.105E+02 0.189E+03 0.258E+03 -.768E-01 -.139E+00 -  
 .520E-01 -.169E-06 -.496E-06 -.117E-06  
 -.150E+02 -.446E+03 -.196E+03 0.150E+02 0.447E+03 0.196E+03 -.699E-01 -.113E+01  
 0.993E-01 0.172E-06 0.150E-06 -.897E-06  
 -.550E+01 -.448E+03 0.204E+03 0.550E+01 0.449E+03 -.203E+03 -.465E-02 -.109E+01 -  
 .125E+00 0.236E-05 0.159E-05 0.249E-05  
 -.919E+00 -.203E+03 0.267E+03 0.927E+00 0.203E+03 -.267E+03 -.901E-02 -.102E+00 -  
 .312E-01 0.138E-05 0.248E-06 0.170E-06  
 -.163E+02 -.329E+03 -.218E+03 0.167E+02 0.329E+03 0.218E+03 -.360E+00 -.480E+00  
 0.421E-01 0.129E-05 -.880E-06 -.845E-06  
 -.399E+01 -.261E+03 -.200E+03 0.312E+01 0.254E+03 0.196E+03 0.990E+00 0.796E+01  
 0.483E+01 -.891E-06 -.449E-05 -.625E-05  
 0.530E+02 -.518E+03 -.137E+03 -.540E+02 0.522E+03 0.141E+03 0.107E+01 -.396E+01 -  
 .382E+01 0.169E-05 0.271E-05 -.243E-05  
 -.461E+02 -.583E+03 -.443E+03 0.517E+02 0.633E+03 0.476E+03 -.571E+01 -.505E+02 -  
 .334E+02 -.424E-05 -.204E-04 -.205E-04  
 -----  
 0.419E+01 0.275E+02 0.215E+02 -.291E-12 -.330E-11 0.284E-11 -.423E+01 -.275E+02 -  
 .216E+02 -.409E-05 0.564E-04 -.104E-03

## POSITION

## TOTAL-FORCE (eV/Angst)

-----

|          |          |         |           |           |           |
|----------|----------|---------|-----------|-----------|-----------|
| 1.24575  | 4.02870  | 5.43979 | 0.000034  | 0.001067  | -0.000440 |
| 1.21024  | 4.07581  | 8.43726 | -0.000997 | 0.002700  | -0.001064 |
| 3.70862  | 4.02890  | 5.43965 | 0.000308  | 0.001938  | -0.001126 |
| 3.67998  | 4.07733  | 8.43690 | -0.004033 | -0.000332 | -0.002827 |
| 6.17157  | 4.02854  | 5.43942 | -0.000001 | -0.000089 | -0.001782 |
| 6.14482  | 4.08292  | 8.43295 | -0.002823 | -0.003218 | -0.003100 |
| 8.63513  | 4.02801  | 5.43869 | 0.000782  | -0.000389 | -0.002026 |
| 8.60339  | 4.08732  | 8.43089 | -0.000128 | -0.001093 | -0.002101 |
| 11.09928 | 4.02784  | 5.43885 | 0.000868  | 0.002026  | -0.002734 |
| 11.06021 | 4.08619  | 8.43099 | -0.001749 | 0.000787  | -0.000532 |
| 13.56311 | 4.02807  | 5.43972 | 0.000321  | 0.001672  | -0.001647 |
| 13.52141 | 4.08047  | 8.43349 | 0.000387  | -0.002168 | 0.000392  |
| 2.44241  | 15.48073 | 8.85224 | -0.000627 | -0.005386 | 0.002509  |
| 0.01714  | 15.44624 | 5.32469 | 0.000312  | 0.001521  | -0.001250 |
| 4.86040  | 15.47728 | 8.86623 | 0.001566  | 0.000021  | -0.001069 |
| 2.48016  | 15.44854 | 5.27562 | 0.000368  | -0.001213 | -0.000583 |
| 4.94382  | 15.44925 | 5.24869 | 0.001868  | -0.003089 | 0.000381  |
| 12.31531 | 15.48242 | 9.00211 | -0.005875 | 0.000346  | 0.007827  |
| 9.86772  | 15.44556 | 5.34176 | 0.000398  | -0.001177 | 0.000944  |
| 14.76279 | 15.48245 | 8.89951 | -0.006428 | -0.000685 | 0.005640  |

|          |          |         |           |           |           |
|----------|----------|---------|-----------|-----------|-----------|
| 12.33384 | 15.44510 | 5.36128 | 0.001312  | -0.003274 | -0.001259 |
| 7.40743  | 15.44616 | 5.26463 | 0.002384  | 0.001297  | 0.001552  |
| 6.44846  | 16.34427 | 7.40648 | -0.001431 | -0.004028 | 0.000002  |
| 8.60064  | 16.47644 | 7.89249 | 0.001180  | 0.002882  | 0.006861  |
| 1.24544  | 5.11881  | 5.35500 | 0.000918  | -0.000003 | -0.002375 |
| 2.44348  | 5.83889  | 8.62292 | 0.002418  | -0.004358 | 0.001236  |
| 0.01380  | 5.79530  | 5.28573 | 0.002087  | -0.002338 | 0.000467  |
| 1.21063  | 5.16420  | 8.54151 | 0.000226  | -0.000532 | -0.001985 |
| 2.44351  | 7.27931  | 8.74832 | -0.000018 | -0.001331 | -0.000148 |
| 3.70866  | 5.11896  | 5.35390 | -0.000414 | -0.001786 | 0.000405  |
| 4.90800  | 5.84315  | 8.62123 | -0.001135 | 0.003877  | -0.000711 |
| 2.47701  | 5.79561  | 5.28397 | 0.001456  | -0.000477 | -0.002610 |
| 3.67679  | 5.16572  | 8.54000 | -0.000076 | 0.001637  | -0.000120 |
| 4.90764  | 7.28398  | 8.74777 | 0.000475  | -0.000645 | 0.001002  |
| 6.17184  | 5.11860  | 5.35433 | 0.001492  | 0.000191  | 0.000996  |
| 7.37096  | 5.84929  | 8.62094 | -0.000533 | 0.007158  | -0.002446 |
| 4.94029  | 5.79548  | 5.28340 | 0.000587  | -0.002563 | -0.001179 |
| 6.14080  | 5.17108  | 8.53715 | -0.002512 | 0.002436  | 0.002342  |
| 7.37071  | 7.28983  | 8.75132 | -0.002015 | 0.001562  | 0.000128  |
| 8.63543  | 5.11820  | 5.35521 | 0.001218  | 0.001121  | -0.000967 |
| 9.83233  | 5.85166  | 8.62337 | 0.002827  | 0.001208  | -0.001062 |
| 7.40374  | 5.79498  | 5.28512 | 0.003467  | -0.002548 | -0.001342 |

|          |          |         |           |           |           |
|----------|----------|---------|-----------|-----------|-----------|
| 8.60194  | 5.17528  | 8.53759 | -0.002063 | -0.000651 | -0.000341 |
| 9.83204  | 7.29110  | 8.75719 | -0.001766 | -0.003252 | -0.002508 |
| 11.09930 | 5.11814  | 5.35578 | -0.000862 | -0.003573 | -0.001275 |
| 12.29449 | 5.84673  | 8.62385 | -0.000085 | 0.005888  | -0.002184 |
| 9.86750  | 5.79468  | 5.28678 | -0.000739 | -0.000554 | 0.001552  |
| 11.06261 | 5.17409  | 8.53894 | 0.002775  | 0.002493  | -0.000515 |
| 12.29428 | 7.28729  | 8.75533 | -0.004598 | 0.001083  | -0.001534 |
| 13.56278 | 5.11829  | 5.35605 | 0.002645  | 0.000336  | -0.001882 |
| 14.75895 | 5.83988  | 8.62434 | -0.000234 | -0.002631 | -0.002156 |
| 12.33118 | 5.79480  | 5.28692 | -0.004526 | -0.001330 | 0.002591  |
| 13.52535 | 5.16844  | 8.54022 | -0.003451 | 0.003682  | -0.001556 |
| 14.75917 | 7.28012  | 8.75179 | 0.001134  | 0.002542  | -0.000719 |
| 0.01434  | 7.23830  | 5.19017 | 0.000092  | -0.000215 | 0.000092  |
| 1.24689  | 9.38061  | 5.13160 | 0.000565  | -0.001886 | 0.000019  |
| 1.21085  | 7.98059  | 8.79588 | -0.001067 | -0.000458 | 0.001558  |
| 2.44214  | 10.12243 | 8.87141 | -0.000695 | 0.004342  | -0.004972 |
| 0.01532  | 10.08686 | 5.14049 | -0.002070 | -0.000136 | -0.002399 |
| 1.24606  | 7.94244  | 5.15775 | 0.001985  | -0.002594 | 0.000829  |
| 1.21082  | 9.41592  | 8.85782 | -0.001316 | 0.004203  | 0.000167  |
| 2.44072  | 11.55513 | 8.88414 | -0.006007 | -0.004083 | 0.001433  |
| 2.47747  | 7.23842  | 5.18585 | 0.002799  | 0.002848  | 0.001335  |
| 3.70997  | 9.38055  | 5.12566 | -0.001084 | -0.003027 | 0.000061  |

|         |          |         |           |           |           |
|---------|----------|---------|-----------|-----------|-----------|
| 3.67534 | 7.98360  | 8.79349 | -0.000507 | 0.000984  | 0.000965  |
| 4.90487 | 10.12925 | 8.87518 | -0.000220 | 0.000724  | 0.000132  |
| 2.47867 | 10.08713 | 5.12695 | -0.002277 | 0.001481  | 0.000771  |
| 3.70939 | 7.94242  | 5.15441 | 0.000831  | -0.004009 | -0.001701 |
| 3.67589 | 9.41970  | 8.85445 | -0.001308 | 0.001845  | -0.000154 |
| 4.90263 | 11.56506 | 8.89086 | -0.001208 | -0.000157 | 0.001018  |
| 4.94085 | 7.23830  | 5.18552 | -0.004720 | 0.002225  | 0.000851  |
| 6.17318 | 9.38002  | 5.13173 | 0.001988  | 0.002040  | 0.001857  |
| 6.13864 | 7.99044  | 8.79647 | 0.002557  | -0.000002 | -0.001657 |
| 7.36780 | 10.13760 | 8.89473 | -0.000958 | 0.003547  | 0.000160  |
| 4.94196 | 10.08682 | 5.12700 | 0.004146  | 0.001469  | -0.001158 |
| 6.17284 | 7.94199  | 5.15766 | -0.000036 | 0.000586  | 0.003038  |
| 6.13939 | 9.42660  | 8.86164 | 0.001364  | -0.000790 | -0.002304 |
| 7.36410 | 11.57721 | 8.92935 | -0.001527 | -0.004062 | 0.003938  |
| 7.40426 | 7.23794  | 5.19012 | 0.002146  | 0.001747  | 0.001090  |
| 8.63700 | 9.37970  | 5.14543 | -0.000618 | 0.002891  | 0.000981  |
| 8.60086 | 7.99568  | 8.80617 | 0.000865  | 0.000191  | -0.000899 |
| 9.83068 | 10.14286 | 8.92842 | -0.002270 | 0.004729  | -0.001203 |
| 7.40553 | 10.08627 | 5.14064 | 0.001249  | -0.003537 | 0.003138  |
| 8.63637 | 7.94166  | 5.16555 | 0.002582  | 0.001821  | -0.001406 |
| 8.60077 | 9.43254  | 8.88532 | -0.006150 | 0.001418  | -0.001258 |
| 9.82927 | 11.58244 | 9.00096 | 0.001549  | -0.001219 | 0.000961  |

|          |          |         |           |           |           |
|----------|----------|---------|-----------|-----------|-----------|
| 9.86805  | 7.23787  | 5.19489 | -0.000369 | 0.000068  | -0.000169 |
| 11.10106 | 9.37979  | 5.15156 | -0.003808 | -0.001067 | 0.000689  |
| 11.06331 | 7.99411  | 8.80818 | -0.000079 | -0.001122 | 0.000268  |
| 12.29815 | 10.12943 | 8.90340 | -0.000954 | -0.001022 | 0.000971  |
| 9.86930  | 10.08593 | 5.15631 | -0.005426 | -0.001372 | 0.001419  |
| 11.10021 | 7.94175  | 5.16862 | -0.000577 | -0.003058 | 0.001390  |
| 11.06206 | 9.43062  | 8.88839 | 0.004949  | 0.001126  | 0.002077  |
| 12.30255 | 11.56557 | 8.94694 | 0.004183  | -0.001869 | -0.000336 |
| 12.33169 | 7.23799  | 5.19447 | -0.001056 | 0.000234  | -0.001732 |
| 13.56437 | 9.38021  | 5.14435 | 0.000778  | 0.001601  | -0.000550 |
| 13.52754 | 7.98555  | 8.80171 | -0.000782 | -0.002224 | -0.003102 |
| 14.76233 | 10.12320 | 8.88285 | -0.004688 | 0.001455  | -0.001551 |
| 12.33257 | 10.08637 | 5.15511 | 0.002591  | 0.000589  | -0.001538 |
| 13.56350 | 7.94214  | 5.16485 | -0.000085 | -0.000869 | -0.000368 |
| 13.52731 | 9.42040  | 8.86925 | -0.000576 | 0.002786  | -0.000639 |
| 14.76430 | 11.55727 | 8.90646 | -0.001661 | -0.001725 | 0.002064  |
| 0.01611  | 11.52516 | 5.16621 | -0.001091 | -0.002622 | 0.000409  |
| 1.24770  | 13.67535 | 5.22209 | 0.001628  | -0.002856 | -0.002494 |
| 1.21217  | 12.26335 | 8.89409 | -0.000247 | -0.000194 | 0.001234  |
| 2.43998  | 14.38728 | 8.86748 | -0.003681 | 0.003091  | 0.000803  |
| 0.01699  | 14.35408 | 5.27295 | -0.000239 | -0.000012 | -0.001985 |
| 1.24794  | 12.22963 | 5.17275 | 0.001078  | 0.000780  | -0.001369 |

|         |          |         |           |           |           |
|---------|----------|---------|-----------|-----------|-----------|
| 1.21434 | 13.70818 | 8.88771 | 0.004214  | 0.000089  | 0.003885  |
| 2.47958 | 11.52580 | 5.14547 | -0.001617 | -0.000232 | -0.001455 |
| 3.71218 | 13.67636 | 5.19535 | 0.004783  | -0.000013 | 0.001028  |
| 3.66932 | 12.26248 | 8.88184 | -0.001470 | -0.000126 | -0.000623 |
| 4.89370 | 14.38589 | 8.86075 | 0.005964  | 0.000184  | -0.001853 |
| 2.48000 | 14.35596 | 5.23149 | 0.001346  | -0.000536 | 0.001703  |
| 3.71150 | 12.23022 | 5.15602 | 0.000889  | -0.004599 | 0.001004  |
| 3.66212 | 13.70366 | 8.87117 | -0.004749 | 0.002088  | 0.000272  |
| 4.94290 | 11.52542 | 5.14351 | -0.000062 | -0.001855 | -0.001584 |
| 6.17627 | 13.67505 | 5.20032 | 0.001059  | -0.000109 | -0.000001 |
| 6.13145 | 12.27911 | 8.90591 | 0.006408  | 0.007856  | 0.004734  |
| 7.36614 | 14.42967 | 8.88203 | 0.017540  | 0.002672  | 0.000733  |
| 4.94347 | 14.35627 | 5.21375 | -0.000002 | -0.001135 | 0.000970  |
| 6.17493 | 12.22917 | 5.16623 | -0.001466 | -0.001069 | 0.001603  |
| 6.11879 | 13.72336 | 8.87765 | 0.000495  | -0.006990 | -0.001627 |
| 7.40625 | 11.52413 | 5.16368 | 0.000921  | -0.003487 | 0.000365  |
| 8.63876 | 13.67323 | 5.24377 | 0.001688  | 0.001229  | -0.001392 |
| 8.58939 | 12.29067 | 9.00208 | -0.003013 | 0.008266  | 0.004088  |
| 9.83855 | 14.39048 | 9.30305 | -0.027676 | -0.458948 | -0.262284 |
| 7.40672 | 14.35386 | 5.23530 | -0.001236 | 0.000701  | -0.001052 |
| 8.63820 | 12.22778 | 5.19800 | 0.000243  | -0.001242 | 0.001095  |
| 8.55571 | 13.73596 | 9.04598 | -0.048369 | -0.059630 | -0.023230 |

|          |          |          |           |           |           |
|----------|----------|----------|-----------|-----------|-----------|
| 9.86985  | 11.52338 | 5.18893  | 0.001761  | -0.002164 | -0.000083 |
| 11.10099 | 13.67352 | 5.27669  | 0.003365  | -0.001632 | -0.001016 |
| 11.07378 | 12.27333 | 9.00891  | -0.002632 | 0.009502  | 0.002591  |
| 12.30694 | 14.38896 | 9.00333  | -0.017553 | 0.006350  | -0.000390 |
| 9.86934  | 14.35300 | 5.29564  | 0.002868  | 0.001030  | 0.000310  |
| 11.10161 | 12.22804 | 5.21650  | -0.001078 | -0.002778 | 0.001060  |
| 11.11464 | 13.70636 | 9.07877  | 0.053726  | -0.054659 | -0.029168 |
| 12.33326 | 11.52411 | 5.18815  | -0.000955 | 0.000157  | 0.000545  |
| 13.56430 | 13.67399 | 5.25995  | 0.001311  | -0.000632 | 0.000060  |
| 13.53626 | 12.26601 | 8.93587  | -0.003198 | 0.005345  | 0.002485  |
| 14.76266 | 14.38906 | 8.90426  | -0.007942 | 0.003914  | 0.003859  |
| 12.33397 | 14.35288 | 5.30710  | 0.002875  | -0.001093 | -0.001870 |
| 13.56505 | 12.22870 | 5.20105  | 0.000158  | 0.000033  | -0.001137 |
| 13.54921 | 13.70690 | 8.94399  | 0.004760  | -0.010712 | -0.002141 |
| 9.91126  | 15.51685 | 9.99472  | 0.128473  | 1.469900  | 0.880149  |
| 7.28864  | 16.40884 | 8.69813  | 0.009228  | 0.004171  | 0.001756  |
| 10.02526 | 16.50365 | 10.64498 | -0.098323 | -0.911234 | -0.567831 |

---

total drift:

-0.044042

0.025523

-0.024340

---

FREE ENERGIE OF THE ION-ELECTRON SYSTEM (eV)

-----

free energy TOTEN = -1209.37819232 eV

energy without entropy= -1209.37819232 energy(sigma->0) = -1209.37819232

d Force = 0.3334634E-03[-0.441E-01, 0.448E-01] d Energy = 0.3726225E-04 0.296E-03

d Force =-0.7453164E+01[-0.763E+01,-0.728E+01] d Ewald =-0.7453352E+01 0.188E-03

-----

POTLOK: cpu time 0.1766: real time 0.1773

-----

stress matrix after NEB project (eV)

-17.74616      -0.31103      0.00384

-0.31103      -15.46958      0.28168

0.00384      0.28168      -19.19948

FORCES: max atom, RMS      1.718072      0.167296

FORCE total and by dimension      2.028354      1.469900

Stress total and by dimension      30.384309      19.199481

Finite differences progress:

Degree of freedom:    2/ 6

Displacement:            2/ 2

Total:                    4/ 12

LATTYP: Found a simple orthorhombic cell.

ALAT            =      14.7806000000

B/A-ratio    =      1.2466138046

C/A-ratio    =      1.4433717170

Lattice vectors:

A1 = ( -14.7806000000,    0.0000000000,    0.0000000000)

A2 = (    0.0000000000,    0.0000000000, -18.4257000000)

A3 = (    0.0000000000, -21.3339000000,    0.0000000000)

Analysis of symmetry for initial positions (statically):

---

Subroutine PRICEL returns:

Original cell was already a primitive cell.

Routine SETGRP: Setting up the symmetry group for a  
simple orthorhombic supercell.

Subroutine GETGRP returns: Found 1 space group operations  
(whereof 1 operations were pure point group operations)  
out of a pool of 8 trial point group operations.

The static configuration has the point symmetry  $C_1$ .

Analysis of symmetry for dynamics (positions and initial velocities):

---

Subroutine PRICEL returns:

Original cell was already a primitive cell.

Routine SETGRP: Setting up the symmetry group for a  
simple orthorhombic supercell.

Subroutine GETGRP returns: Found 1 space group operations  
(whereof 1 operations were pure point group operations)  
out of a pool of 8 trial point group operations.

The dynamic configuration has the point symmetry  $C_1$ .

Analysis of constrained symmetry for selective dynamics:

=====

Subroutine PRICEL returns:

Original cell was already a primitive cell.

Routine SETGRP: Setting up the symmetry group for a

simple orthorhombic supercell.

Subroutine GETGRP returns: Found 1 space group operations

(whereof 1 operations were pure point group operations)

out of a pool of 8 trial point group operations.

The constrained configuration has the point symmetry  $C_1$ .

Analysis of structural, dynamic, and magnetic symmetry:

=====

Subroutine PRICEL returns:

Original cell was already a primitive cell.

Routine SETGRP: Setting up the symmetry group for a

simple orthorhombic supercell.

Subroutine GETGRP returns: Found 1 space group operations

(whereof 1 operations were pure point group operations)

out of a pool of 8 trial point group operations.

The magnetic configuration has the point symmetry  $C_1$ .

Subroutine INISYM returns: Found 1 space group operations

(whereof 1 operations are pure point group operations),

and found 1 'primitive' translations

KPOINTS: KPT-Resolved Value to Generate K-Mesh: 0

Automatic generation of k-mesh.

Space group operators:

| irotn    | det(A)   | alpha    | n_x      | n_y      | n_z      | tau_x    |
|----------|----------|----------|----------|----------|----------|----------|
| tau_y    | tau_z    |          |          |          |          |          |
| 1        | 1.000000 | 0.000000 | 1.000000 | 0.000000 | 0.000000 | 0.000000 |
| 0.000000 | 0.000000 |          |          |          |          |          |

Subroutine IBZKPT returns following result:

=====

Found 1 irreducible k-points:

Following reciprocal coordinates:

| Coordinates |          |          | Weight   |
|-------------|----------|----------|----------|
| 0.000000    | 0.000000 | 0.000000 | 1.000000 |

Following cartesian coordinates:

| Coordinates |          |          | Weight   |
|-------------|----------|----------|----------|
| 0.000000    | 0.000000 | 0.000000 | 1.000000 |

WAVPRE: cpu time 0.1211: real time 0.1468

FEWALD: cpu time 0.0028: real time 0.0028

ORTHCH: cpu time 1.0109: real time 1.0145

LOOP+: cpu time 191.4862: real time 192.5254

----- Iteration 6( 1) -----

POTLOK: cpu time 0.1693: real time 0.1825

|           |          |          |           |         |
|-----------|----------|----------|-----------|---------|
| SETDIJ:   | cpu time | 0.0101:  | real time | 0.0101  |
| EDDIAG:   | cpu time | 1.9276:  | real time | 1.9344  |
| RMM-DIIS: | cpu time | 7.2910:  | real time | 7.3196  |
| ORTHCH:   | cpu time | 0.3536:  | real time | 0.3547  |
| DOS:      | cpu time | 0.0004:  | real time | 0.0004  |
| CHARGE:   | cpu time | 0.5227:  | real time | 0.5244  |
| MIXING:   | cpu time | 0.0044:  | real time | 0.0044  |
| -----     |          |          |           |         |
| LOOP:     | cpu time | 10.2790: | real time | 10.3305 |

eigenvalue-minimisations : 1956

total energy-change (2. order) :-0.1001863E-01 (-0.1100821E+00)

number of electron 518.9999721 magnetization 0.9999998

augmentation part 11.7398031 magnetization 0.0543081

Broyden mixing:

rms(total) = 0.47550E-01 rms(broyden)= 0.47421E-01

rms(prec ) = 0.49948E-01

weight for this iteration 100.00

Free energy of the ion-electron system (eV)

-----

alpha Z PSCENC = 233.50077011  
Ewald energy TEWEN = 91326.38559271  
-Hartree energy DENC = -107330.69646930  
-exchange EXHF = 0.00000000  
-V(xc)+E(xc) XCENC = 1743.79414627  
PAW double counting = 52171.78321098 -52234.69473161  
entropy T\*S EENTRO = -0.00000000  
eigenvalues EBANDS = -5817.17277353  
atomic energy EATOM = 18704.32991668  
Solvation Ediel\_sol = 0.00000000

-----

free energy TOTEN = -1202.77033769 eV

energy without entropy = -1202.77033769 energy(sigma->0) = -1202.77033769

-----

|           |          |          |           |         |
|-----------|----------|----------|-----------|---------|
| POTLOK:   | cpu time | 0.1649:  | real time | 0.1839  |
| SETDIJ:   | cpu time | 0.0100:  | real time | 0.0101  |
| EDDIAG:   | cpu time | 1.9241:  | real time | 1.9306  |
| RMM-DIIS: | cpu time | 7.1049:  | real time | 7.1310  |
| ORTHCH:   | cpu time | 0.3526:  | real time | 0.3536  |
| DOS:      | cpu time | 0.0004:  | real time | 0.0004  |
| CHARGE:   | cpu time | 0.5220:  | real time | 0.5237  |
| MIXING:   | cpu time | 0.0046:  | real time | 0.0046  |
| -----     |          |          |           |         |
| LOOP:     | cpu time | 10.0833: | real time | 10.1379 |

eigenvalue-minimisations : 1920

total energy-change (2. order) : 0.2702445E-02 (-0.1194759E-02)

number of electron      518.9999721 magnetization      0.9999998

augmentation part      11.7391938 magnetization      0.0543051

Broyden mixing:

rms(total) = 0.28967E-01      rms(broyden)= 0.28947E-01

rms(prec ) = 0.30122E-01

weight for this iteration      100.00

eigenvalues of (default mixing \* dielectric matrix)

average eigenvalue GAMMA= 1.7760

1.7760

Free energy of the ion-electron system (eV)

-----

alpha Z PSCENC = 233.50077011

Ewald energy TEWEN = 91326.38559271

-Hartree energy DENC = -107331.63086935

-exchange EXHF = 0.00000000

-V(xc)+E(xc) XCENC = 1743.80346232

PAW double counting = 52177.30293271 -52240.21947228

entropy T\*S EENTRO = -0.00000000

eigenvalues EBANDS = -5816.23996815

atomic energy EATOM = 18704.32991668

Solvation Ediel\_sol = 0.00000000

-----

free energy TOTEN = -1202.76763524 eV

energy without entropy = -1202.76763524 energy(sigma->0) = -1202.76763524

-----

----- Iteration 6( 3) -----

|           |          |         |           |        |
|-----------|----------|---------|-----------|--------|
| POTLOK:   | cpu time | 0.1715: | real time | 0.1814 |
| SETDIJ:   | cpu time | 0.0102: | real time | 0.0102 |
| EDDIAG:   | cpu time | 1.9337: | real time | 1.9398 |
| RMM-DIIS: | cpu time | 7.2619: | real time | 7.2913 |
| ORTHCH:   | cpu time | 0.3560: | real time | 0.3570 |
| DOS:      | cpu time | 0.0004: | real time | 0.0004 |
| CHARGE:   | cpu time | 0.5236: | real time | 0.5251 |
| MIXING:   | cpu time | 0.0051: | real time | 0.0051 |

-----

|       |          |          |           |         |
|-------|----------|----------|-----------|---------|
| LOOP: | cpu time | 10.2624: | real time | 10.3103 |
|-------|----------|----------|-----------|---------|

eigenvalue-minimisations : 1951

total energy-change (2. order) : 0.1331199E-02 (-0.2327101E-03)

|                    |             |               |           |
|--------------------|-------------|---------------|-----------|
| number of electron | 518.9999721 | magnetization | 0.9999998 |
| augmentation part  | 11.7398417  | magnetization | 0.0542807 |

Broyden mixing:

rms(total) = 0.10298E-01      rms(broyden)= 0.10295E-01

rms(prec ) = 0.10787E-01

weight for this iteration      100.00

eigenvalues of (default mixing \* dielectric matrix)

average eigenvalue GAMMA=    1.5890

0.8801   2.2980

Free energy of the ion-electron system (eV)

-----

alpha Z          PSCENC =          233.50077011

Ewald energy    TEWEN   =          91326.38559271

-Hartree energ DENC   =   -107332.58532328

-exchange       EXHF     =          0.00000000

-V(xc)+E(xc)    XCENC   =          1743.80705228

PAW double counting   =   52182.04596580   -52244.96724008

entropy T\*S     EENTRO =          -0.00000000

eigenvalues     EBANDS =          -5815.28303826

atomic energy EATOM = 18704.32991668

Solvation Ediel\_sol = 0.00000000

-----  
free energy TOTEN = -1202.76630404 eV

energy without entropy = -1202.76630404 energy(sigma->0) = -1202.76630404

----- Iteration 6( 4) -----

|           |          |         |           |        |
|-----------|----------|---------|-----------|--------|
| POTLOK:   | cpu time | 0.1663: | real time | 0.1826 |
| SETDIJ:   | cpu time | 0.0100: | real time | 0.0100 |
| EDDIAG:   | cpu time | 1.9235: | real time | 1.9299 |
| RMM-DIIS: | cpu time | 7.1773: | real time | 7.2127 |
| ORTHCH:   | cpu time | 0.3522: | real time | 0.3532 |
| DOS:      | cpu time | 0.0004: | real time | 0.0004 |

CHARGE: cpu time 0.5237: real time 0.5254

MIXING: cpu time 0.0051: real time 0.0051

-----

LOOP: cpu time 10.1584: real time 10.2193

eigenvalue-minimisations : 1928

total energy-change (2. order) : 0.1567427E-03 (-0.3120966E-04)

number of electron 518.9999721 magnetization 0.9999998

augmentation part 11.7395726 magnetization 0.0542737

Broyden mixing:

rms(total) = 0.34379E-02 rms(broyden)= 0.34364E-02

rms(prec ) = 0.38359E-02

weight for this iteration 100.00

eigenvalues of (default mixing \* dielectric matrix)

average eigenvalue GAMMA= 1.5455

2.1910 0.8726 1.5728

Free energy of the ion-electron system (eV)

-----

alpha Z PSCENC = 233.50077011

Ewald energy TEWEN = 91326.38559271

-Hartree energy DENC = -107333.06872087

-exchange EXHF = 0.00000000

-V(xc)+E(xc) XCENC = 1743.81198433

PAW double counting = 52183.26893354 -52246.19291292

entropy T\*S EENTRO = -0.00000000

eigenvalues EBANDS = -5814.80171088

atomic energy EATOM = 18704.32991668

Solvation Ediel\_sol = 0.00000000

-----

free energy TOTEN = -1202.76614730 eV

energy without entropy = -1202.76614730 energy(sigma->0) = -1202.76614730

-----

----- Iteration 6( 5) -----

|           |          |          |           |         |
|-----------|----------|----------|-----------|---------|
| POTLOK:   | cpu time | 0.1675:  | real time | 0.1869  |
| SETDIJ:   | cpu time | 0.0101:  | real time | 0.0101  |
| EDDIAG:   | cpu time | 1.9238:  | real time | 1.9302  |
| RMM-DIIS: | cpu time | 7.2366:  | real time | 7.2621  |
| ORTHCH:   | cpu time | 0.3538:  | real time | 0.3549  |
| DOS:      | cpu time | 0.0004:  | real time | 0.0004  |
| CHARGE:   | cpu time | 0.5245:  | real time | 0.5260  |
| MIXING:   | cpu time | 0.0057:  | real time | 0.0057  |
| -----     |          |          |           |         |
| LOOP:     | cpu time | 10.2223: | real time | 10.2762 |

eigenvalue-minimisations : 1942

total energy-change (2. order) : 0.7849347E-05 (-0.5490326E-05)

number of electron      518.9999721 magnetization      0.9999998

augmentation part      11.7396528 magnetization      0.0542764

Broyden mixing:

rms(total) = 0.16238E-02      rms(broyden)= 0.16225E-02

rms(prec ) = 0.19470E-02

weight for this iteration      100.00

eigenvalues of (default mixing \* dielectric matrix)

average eigenvalue GAMMA= 1.4412

2.2577 1.8986 0.8042 0.8042

Free energy of the ion-electron system (eV)

-----

alpha Z PSCENC = 233.50077011

Ewald energy TEWEN = 91326.38559271

-Hartree energ DENC = -107333.26968438

-exchange EXHF = 0.00000000

-V(xc)+E(xc) XCENC = 1743.81210898

PAW double counting = 52182.77204465 -52245.69601456

entropy T\*S EENTRO = -0.00000000

eigenvalues EBANDS = -5814.60087365

atomic energy EATOM = 18704.32991668

Solvation Ediel\_sol = 0.00000000

-----

free energy TOTEN = -1202.76613945 eV

energy without entropy = -1202.76613945 energy(sigma->0) = -1202.76613945

-----

----- Iteration 6( 6) -----

|           |          |         |           |        |
|-----------|----------|---------|-----------|--------|
| POTLOK:   | cpu time | 0.1664: | real time | 0.1709 |
| SETDIJ:   | cpu time | 0.0101: | real time | 0.0101 |
| EDDIAG:   | cpu time | 1.9242: | real time | 1.9307 |
| RMM-DIIS: | cpu time | 7.1129: | real time | 7.1518 |
| ORTHCH:   | cpu time | 0.3522: | real time | 0.3532 |
| DOS:      | cpu time | 0.0004: | real time | 0.0004 |
| CHARGE:   | cpu time | 0.5225: | real time | 0.5239 |
| MIXING:   | cpu time | 0.0060: | real time | 0.0060 |

-----

|       |          |          |           |         |
|-------|----------|----------|-----------|---------|
| LOOP: | cpu time | 10.0946: | real time | 10.1469 |
|-------|----------|----------|-----------|---------|

eigenvalue-minimisations : 1915

total energy-change (2. order) :-0.1597672E-04 (-0.7317084E-06)

number of electron 518.9999721 magnetization 0.9999998

augmentation part            11.7396200 magnetization            0.0542762

Broyden mixing:

rms(total) = 0.87071E-03      rms(broyden)= 0.87044E-03

rms(prec ) = 0.12039E-02

weight for this iteration      100.00

eigenvalues of (default mixing \* dielectric matrix)

average eigenvalue GAMMA=    1.4706

2.5054   1.9658   1.0617   1.0617   0.7584

Free energy of the ion-electron system (eV)

-----

alpha Z            PSCENC =            233.50077011

Ewald energy      TEWEN =            91326.38559271

-Hartree energ DENC =    -107333.41584290

-exchange        EXHF =            0.00000000

-V(xc)+E(xc)      XCENC =            1743.81301085

PAW double counting =    52182.45561432    -52245.37987409

entropy T\*S       EENTRO =            -0.00000000

eigenvalues       EBANDS =            -5814.45534312

atomic energy    EATOM =            18704.32991668

Solvation Ediel\_sol = 0.00000000

-----

free energy TOTEN = -1202.76615543 eV

energy without entropy = -1202.76615543 energy(sigma->0) = -1202.76615543

-----

----- Iteration 6( 7) -----

|           |          |         |           |        |
|-----------|----------|---------|-----------|--------|
| POTLOK:   | cpu time | 0.1677: | real time | 0.1839 |
| SETDIJ:   | cpu time | 0.0101: | real time | 0.0101 |
| EDDIAG:   | cpu time | 1.9211: | real time | 1.9279 |
| RMM-DIIS: | cpu time | 7.0744: | real time | 7.1154 |
| ORTHCH:   | cpu time | 0.3521: | real time | 0.3532 |
| DOS:      | cpu time | 0.0004: | real time | 0.0004 |
| CHARGE:   | cpu time | 0.5226: | real time | 0.5243 |

MIXING: cpu time 0.0060: real time 0.0061

-----

LOOP: cpu time 10.0543: real time 10.1212

eigenvalue-minimisations : 1915

total energy-change (2. order) :-0.3850990E-04 (-0.7349703E-06)

number of electron 518.9999721 magnetization 0.9999998

augmentation part 11.7396365 magnetization 0.0542735

Broyden mixing:

rms(total) = 0.43019E-03 rms(broyden)= 0.42986E-03

rms(prec ) = 0.70721E-03

weight for this iteration 100.00

eigenvalues of (default mixing \* dielectric matrix)

average eigenvalue GAMMA= 1.4625

2.7466 2.1948 1.4468 0.8763 0.8763 0.6342

Free energy of the ion-electron system (eV)

-----

alpha Z PSCENC = 233.50077011

Ewald energy TEWEN = 91326.38559271

-Hartree energ DENC = -107333.60734269

-exchange EXHF = 0.00000000

-V(xc)+E(xc) XCENC = 1743.81388009

PAW double counting = 52182.05238625 -52244.97686777

entropy T\*S EENTRO = -0.00000000

eigenvalues EBANDS = -5814.26452930

atomic energy EATOM = 18704.32991668

Solvation Ediel\_sol = 0.00000000

-----  
free energy TOTEN = -1202.76619394 eV

energy without entropy = -1202.76619394 energy(sigma->0) = -1202.76619394

----- Iteration 6( 8) -----

|           |          |         |           |        |
|-----------|----------|---------|-----------|--------|
| POTLOK:   | cpu time | 0.1656: | real time | 0.1803 |
| SETDIJ:   | cpu time | 0.0101: | real time | 0.0101 |
| EDDIAG:   | cpu time | 1.9216: | real time | 1.9277 |
| RMM-DIIS: | cpu time | 6.3237: | real time | 6.3448 |
| ORTHCH:   | cpu time | 0.3536: | real time | 0.3547 |
| DOS:      | cpu time | 0.0004: | real time | 0.0004 |
| CHARGE:   | cpu time | 0.5227: | real time | 0.5243 |
| MIXING:   | cpu time | 0.0066: | real time | 0.0066 |
| -----     |          |         |           |        |
| LOOP:     | cpu time | 9.3043: | real time | 9.3489 |

eigenvalue-minimisations : 1726

total energy-change (2. order) :-0.2808717E-04 (-0.1158261E-06)

number of electron 518.9999721 magnetization 0.9999998

augmentation part 11.7396544 magnetization 0.0542730

Broyden mixing:

rms(total) = 0.30015E-03 rms(broyden)= 0.30002E-03

rms(prec ) = 0.52021E-03

weight for this iteration 100.00

eigenvalues of (default mixing \* dielectric matrix)

average eigenvalue GAMMA= 1.4128

2.7619 2.3588 1.2523 1.0608 1.0608 0.7702 0.6250

Free energy of the ion-electron system (eV)

-----

alpha Z PSCENC = 233.50077011

Ewald energy TEWEN = 91326.38559271

-Hartree energy DENC = -107333.70678129

-exchange EXHF = 0.00000000

-V(xc)+E(xc) XCENC = 1743.81426704

PAW double counting = 52181.86940472 -52244.79393771

entropy T\*S EENTRO = -0.00000000

eigenvalues EBANDS = -5814.16545428

atomic energy EATOM = 18704.32991668

Solvation Ediel\_sol = 0.00000000

-----

free energy TOTEN = -1202.76622202 eV

energy without entropy = -1202.76622202 energy(sigma->0) = -1202.76622202

-----

----- Iteration 6( 9) -----

|           |          |         |           |        |
|-----------|----------|---------|-----------|--------|
| POTLOK:   | cpu time | 0.1756: | real time | 0.1812 |
| SETDIJ:   | cpu time | 0.0102: | real time | 0.0102 |
| EDDIAG:   | cpu time | 1.9333: | real time | 1.9400 |
| RMM-DIIS: | cpu time | 6.2988: | real time | 6.3274 |
| ORTHCH:   | cpu time | 0.3510: | real time | 0.3521 |
| DOS:      | cpu time | 0.0004: | real time | 0.0004 |
| CHARGE:   | cpu time | 0.5280: | real time | 0.5297 |
| MIXING:   | cpu time | 0.0067: | real time | 0.0068 |

-----

|       |          |         |           |        |
|-------|----------|---------|-----------|--------|
| LOOP: | cpu time | 9.3040: | real time | 9.3480 |
|-------|----------|---------|-----------|--------|

eigenvalue-minimisations : 1736

total energy-change (2. order) :-0.4233239E-04 (-0.1657503E-06)

|                    |             |               |           |
|--------------------|-------------|---------------|-----------|
| number of electron | 518.9999721 | magnetization | 0.9999998 |
|--------------------|-------------|---------------|-----------|

|                   |            |               |           |
|-------------------|------------|---------------|-----------|
| augmentation part | 11.7396555 | magnetization | 0.0542729 |
|-------------------|------------|---------------|-----------|

Broyden mixing:

rms(total) = 0.19358E-03      rms(broyden)= 0.19338E-03

rms(prec ) = 0.34359E-03

weight for this iteration      100.00

eigenvalues of (default mixing \* dielectric matrix)

average eigenvalue GAMMA=    1.5676

3.4856   2.5739   1.8979   1.3419   0.9113   0.9113   0.8029   0.6163

Free energy of the ion-electron system (eV)

-----

alpha Z          PSCENC =          233.50077011

Ewald energy    TEWEN   =          91326.38559271

-Hartree energy DENC   =   -107333.81953903

-exchange       EXHF     =          0.00000000

-V(xc)+E(xc)    XCENC   =          1743.81479173

PAW double counting   =   52181.76546902   -52244.69006439

entropy T\*S     EENTRO =          -0.00000000

eigenvalues     EBANDS =          -5814.05320119

atomic energy   EATOM   =          18704.32991668

Solvation       Ediel\_sol   =          0.00000000

-----  
free energy    TOTEN    =    -1202.76626436 eV

energy without entropy =    -1202.76626436    energy(sigma->0) =    -1202.76626436

----- Iteration    6( 10) -----

|           |          |         |           |        |
|-----------|----------|---------|-----------|--------|
| POTLOK:   | cpu time | 0.1658: | real time | 0.1675 |
| SETDIJ:   | cpu time | 0.0102: | real time | 0.0102 |
| EDDIAG:   | cpu time | 1.9209: | real time | 1.9273 |
| RMM-DIIS: | cpu time | 6.2383: | real time | 6.2556 |
| ORTHCH:   | cpu time | 0.3505: | real time | 0.3514 |
| DOS:      | cpu time | 0.0004: | real time | 0.0004 |
| CHARGE:   | cpu time | 0.5222: | real time | 0.5238 |
| MIXING:   | cpu time | 0.0071: | real time | 0.0071 |

-----  
LOOP:  cpu time    9.2154: real time    9.2433

eigenvalue-minimisations : 1712

total energy-change (2. order) :-0.4665642E-04  (-0.2161806E-06)

number of electron    518.9999721 magnetization        0.9999998

augmentation part     11.7396622 magnetization        0.0542723

Broyden mixing:

rms(total) = 0.13873E-03    rms(broyden)= 0.13861E-03

rms(prec ) = 0.19686E-03

weight for this iteration    100.00

eigenvalues of (default mixing \* dielectric matrix)

average eigenvalue GAMMA=    1.5907

4.1712  2.5619  2.1255  1.1272  1.1272  1.0498  0.8307  0.7059  0.6170

Free energy of the ion-electron system (eV)

-----  
alpha Z           PSCENC =        233.50077011

Ewald energy    TEWEN  =        91326.38559271

-Hartree energ DENC  =   -107333.95896625

-exchange EXHF = 0.00000000  
-V(xc)+E(xc) XCENC = 1743.81541695  
PAW double counting = 52181.68441218 -52244.60908998  
entropy T\*S EENTRO = -0.00000000  
eigenvalues EBANDS = -5813.91436341  
atomic energy EATOM = 18704.32991668  
Solvation Ediel\_sol = 0.00000000

-----  
free energy TOTEN = -1202.76631101 eV

energy without entropy = -1202.76631101 energy(sigma->0) = -1202.76631101

----- Iteration 6( 11) -----

POTLOK: cpu time 0.1680: real time 0.1822

|           |          |         |           |        |
|-----------|----------|---------|-----------|--------|
| SETDIJ:   | cpu time | 0.0099: | real time | 0.0099 |
| EDDIAG:   | cpu time | 1.9204: | real time | 1.9273 |
| RMM-DIIS: | cpu time | 5.9011: | real time | 5.9315 |
| ORTHCH:   | cpu time | 0.3507: | real time | 0.3518 |
| DOS:      | cpu time | 0.0004: | real time | 0.0004 |
| CHARGE:   | cpu time | 0.5222: | real time | 0.5240 |
| MIXING:   | cpu time | 0.0078: | real time | 0.0078 |
| -----     |          |         |           |        |
| LOOP:     | cpu time | 8.8805: | real time | 8.9350 |

eigenvalue-minimisations : 1581

total energy-change (2. order) :-0.1588106E-04 (-0.4255913E-07)

number of electron 518.9999721 magnetization 0.9999998

augmentation part 11.7396659 magnetization 0.0542721

Broyden mixing:

rms(total) = 0.76246E-04 rms(broyden)= 0.76184E-04

rms(prec ) = 0.12548E-03

weight for this iteration 100.00

eigenvalues of (default mixing \* dielectric matrix)

average eigenvalue GAMMA= 1.7205

5.1459 2.4493 2.4493 1.7806 1.3169 0.9753 0.9753 0.8168 0.6769 0.6181

Free energy of the ion-electron system (eV)

-----

alpha Z PSCENC = 233.50077011

Ewald energy TEWEN = 91326.38559271

-Hartree energy DENC = -107333.99194078

-exchange EXHF = 0.00000000

-V(xc)+E(xc) XCENC = 1743.81551560

PAW double counting = 52181.69856150 -52244.62324442

entropy T\*S EENTRO = -0.00000000

eigenvalues EBANDS = -5813.88149830

atomic energy EATOM = 18704.32991668

Solvation Ediel\_sol = 0.00000000

-----

free energy TOTEN = -1202.76632689 eV

energy without entropy = -1202.76632689 energy(sigma->0) = -1202.76632689

-----

----- Iteration 6( 12) -----

|           |          |         |           |        |
|-----------|----------|---------|-----------|--------|
| POTLOK:   | cpu time | 0.1660: | real time | 0.1804 |
| SETDIJ:   | cpu time | 0.0102: | real time | 0.0102 |
| EDDIAG:   | cpu time | 1.9193: | real time | 1.9256 |
| RMM-DIIS: | cpu time | 5.8275: | real time | 5.8608 |
| ORTHCH:   | cpu time | 0.3511: | real time | 0.3524 |
| DOS:      | cpu time | 0.0004: | real time | 0.0004 |
| CHARGE:   | cpu time | 0.5055: | real time | 0.5261 |
| MIXING:   | cpu time | 0.0080: | real time | 0.0081 |

-----

|       |          |         |           |        |
|-------|----------|---------|-----------|--------|
| LOOP: | cpu time | 8.7881: | real time | 8.8641 |
|-------|----------|---------|-----------|--------|

eigenvalue-minimisations : 1593

total energy-change (2. order) :-0.2325797E-04 (-0.4434690E-07)

|                    |             |               |           |
|--------------------|-------------|---------------|-----------|
| number of electron | 518.9999721 | magnetization | 0.9999998 |
|--------------------|-------------|---------------|-----------|

|                   |            |               |           |
|-------------------|------------|---------------|-----------|
| augmentation part | 11.7396699 | magnetization | 0.0542720 |
|-------------------|------------|---------------|-----------|

Broyden mixing:

rms(total) = 0.55568E-04      rms(broyden)= 0.55533E-04

rms(prec ) = 0.78786E-04

weight for this iteration      100.00

eigenvalues of (default mixing \* dielectric matrix)

average eigenvalue GAMMA=    1.7969

6.2787   2.7955   2.4544   2.0199   1.1039   1.1039   1.0281   0.8477   0.8477   0.6680

0.6186

Free energy of the ion-electron system (eV)

-----

alpha Z          PSCENC =          233.50077011

Ewald energy    TEWEN   =          91326.38559271

-Hartree energy DENC   =   -107334.02696759

-exchange       EXHF     =          0.00000000

-V(xc)+E(xc)    XCENC   =          1743.81555603

PAW double counting   =   52181.74510527   -52244.66977425

entropy T\*S     EENTRO =          -0.00000000

eigenvalues     EBANDS =          -5813.84654911

atomic energy   EATOM   =          18704.32991668

Solvation    Ediel\_sol   =          0.00000000

-----  
free energy    TOTEN    =    -1202.76635015 eV

energy without entropy =    -1202.76635015    energy(sigma->0) =    -1202.76635015

----- Iteration    6( 13) -----

|           |          |         |           |        |
|-----------|----------|---------|-----------|--------|
| POTLOK:   | cpu time | 0.1657: | real time | 0.1675 |
| SETDIJ:   | cpu time | 0.0101: | real time | 0.0101 |
| EDDIAG:   | cpu time | 1.9201: | real time | 1.9269 |
| RMM-DIIS: | cpu time | 5.2375: | real time | 5.2600 |
| ORTHCH:   | cpu time | 0.3530: | real time | 0.3542 |
| DOS:      | cpu time | 0.0004: | real time | 0.0004 |
| CHARGE:   | cpu time | 0.5229: | real time | 0.5247 |
| MIXING:   | cpu time | 0.0080: | real time | 0.0080 |

-----  
LOOP:  cpu time    8.2177: real time    8.2519

eigenvalue-minimisations : 1444

total energy-change (2. order) :-0.8375973E-05  (-0.1146803E-07)

number of electron    518.9999721 magnetization        0.9999998

augmentation part    11.7396691 magnetization        0.0542721

Broyden mixing:

rms(total) = 0.27406E-04    rms(broyden)= 0.27381E-04

rms(prec ) = 0.45569E-04

weight for this iteration    100.00

eigenvalues of (default mixing \* dielectric matrix)

average eigenvalue GAMMA=    1.7812

6.4961  2.8447  2.4661  2.0617  1.2692  1.2692  1.0076  1.0076  0.8344  0.8344

0.6645  0.6189

Free energy of the ion-electron system (eV)

-----  
alpha Z           PSCENC =        233.50077011

Ewald energy    TEWEN  =        91326.38559271

-Hartree energ DENC = -107334.03792523

-exchange EXHF = 0.00000000

-V(xc)+E(xc) XCENC = 1743.81557829

PAW double counting = 52181.75389046 -52244.67855974

entropy T\*S EENTRO = -0.00000000

eigenvalues EBANDS = -5813.83562182

atomic energy EATOM = 18704.32991668

Solvation Ediel\_sol = 0.00000000

-----  
free energy TOTEN = -1202.76635853 eV

energy without entropy = -1202.76635853 energy(sigma->0) = -1202.76635853

----- Iteration 6( 14) -----

|           |          |         |           |        |
|-----------|----------|---------|-----------|--------|
| POTLOK:   | cpu time | 0.1681: | real time | 0.1698 |
| SETDIJ:   | cpu time | 0.0101: | real time | 0.0101 |
| EDDIAG:   | cpu time | 1.9220: | real time | 1.9287 |
| RMM-DIIS: | cpu time | 5.1813: | real time | 5.2009 |
| ORTHCH:   | cpu time | 0.3511: | real time | 0.3521 |
| DOS:      | cpu time | 0.0004: | real time | 0.0004 |
| CHARGE:   | cpu time | 0.5226: | real time | 0.5244 |
| MIXING:   | cpu time | 0.0084: | real time | 0.0084 |
| -----     |          |         |           |        |
| LOOP:     | cpu time | 8.1640: | real time | 8.1949 |

eigenvalue-minimisations : 1442

total energy-change (2. order) :-0.8807430E-05 (-0.8813363E-08)

number of electron 518.9999721 magnetization 0.9999998

augmentation part 11.7396691 magnetization 0.0542721

Broyden mixing:

rms(total) = 0.19557E-04 rms(broyden)= 0.19550E-04

rms(prec ) = 0.28154E-04

weight for this iteration 100.00

eigenvalues of (default mixing \* dielectric matrix)

average eigenvalue GAMMA= 1.8882

7.0721 3.5856 2.7161 2.2696 1.9531 1.1084 1.1084 1.0077 0.8702 0.8702  
0.6202 0.6532 0.7113

Free energy of the ion-electron system (eV)

-----

alpha Z PSCENC = 233.50077011

Ewald energy TEWEN = 91326.38559271

-Hartree energy DENC = -107334.04242101

-exchange EXHF = 0.00000000

-V(xc)+E(xc) XCENC = 1743.81557008

PAW double counting = 52181.74343998 -52244.66811596

entropy T\*S EENTRO = -0.00000000

eigenvalues EBANDS = -5813.83111994

atomic energy EATOM = 18704.32991668

Solvation Ediel\_sol = 0.00000000

-----

free energy TOTEN = -1202.76636734 eV

energy without entropy = -1202.76636734 energy(sigma->0) = -1202.76636734

-----

----- Iteration 6( 15) -----

|           |          |         |           |        |
|-----------|----------|---------|-----------|--------|
| POTLOK:   | cpu time | 0.1662: | real time | 0.1821 |
| SETDIJ:   | cpu time | 0.0102: | real time | 0.0102 |
| EDDIAG:   | cpu time | 1.9222: | real time | 1.9286 |
| RMM-DIIS: | cpu time | 4.8156: | real time | 4.8475 |
| ORTHCH:   | cpu time | 0.3509: | real time | 0.3521 |
| DOS:      | cpu time | 0.0004: | real time | 0.0004 |
| CHARGE:   | cpu time | 0.5225: | real time | 0.5244 |
| MIXING:   | cpu time | 0.0087: | real time | 0.0087 |

-----

|       |          |         |           |        |
|-------|----------|---------|-----------|--------|
| LOOP: | cpu time | 7.7968: | real time | 7.8541 |
|-------|----------|---------|-----------|--------|

eigenvalue-minimisations : 1335

total energy-change (2. order) :-0.3679939E-05 (-0.3125490E-08)

number of electron 518.9999721 magnetization 0.9999998

augmentation part            11.7396692 magnetization            0.0542721

Broyden mixing:

rms(total) = 0.11390E-04      rms(broyden)= 0.11385E-04

rms(prec ) = 0.16582E-04

weight for this iteration      100.00

eigenvalues of (default mixing \* dielectric matrix)

average eigenvalue GAMMA=    1.9059

7.5049  4.2027  2.5995  2.3688  1.9530  1.1500  1.1500  1.0126  1.0126  0.8964

0.8964  0.6765  0.6214  0.6375

Free energy of the ion-electron system (eV)

-----

alpha Z            PSCENC =            233.50077011

Ewald energy      TEWEN =            91326.38559271

-Hartree energ DENC =    -107334.04418538

-exchange          EXHF =            0.00000000

-V(xc)+E(xc)      XCENC =            1743.81555783

PAW double counting =    52181.74031509    -52244.66499138

entropy T\*S        EENTRO =            -0.00000000

eigenvalues        EBANDS =            -5813.82934667

atomic energy EATOM = 18704.32991668

Solvation Ediel\_sol = 0.00000000

-----  
free energy TOTEN = -1202.76637102 eV

energy without entropy = -1202.76637102 energy(sigma->0) = -1202.76637102

----- Iteration 6( 16) -----

POTLOK: cpu time 0.1685: real time 0.1863

SETDIJ: cpu time 0.0129: real time 0.0135

EDDIAG: cpu time 1.9335: real time 1.9401

RMM-DIIS: cpu time 4.7434: real time 4.7751

ORTHCH: cpu time 0.3508: real time 0.3520

DOS: cpu time 0.0004: real time 0.0004

CHARGE:  cpu time     0.5243: real time     0.5260

MIXING:  cpu time     0.0094: real time     0.0095

-----

LOOP:  cpu time     7.7431: real time     7.8030

eigenvalue-minimisations  :  1275

total energy-change (2. order) :-0.1490218E-05  (-0.9629550E-09)

number of electron       518.9999721 magnetization       0.9999998

augmentation part       11.7396693 magnetization       0.0542721

Broyden mixing:

rms(total) = 0.59416E-05     rms(broyden)= 0.59378E-05

rms(prec ) = 0.10363E-04

weight for this iteration     100.00

eigenvalues of (default mixing \* dielectric matrix)

average eigenvalue GAMMA=    1.9270

7.7636  4.6199  2.5698  2.5698  1.9209  1.5233  1.1849  1.1849  0.9711  0.9711

0.8512  0.8512  0.6741  0.6242  0.6242

Free energy of the ion-electron system (eV)

-----

alpha Z PSCENC = 233.50077011  
Ewald energy TEWEN = 91326.38559271  
-Hartree energy DENC = -107334.04451178  
-exchange EXHF = 0.00000000  
-V(xc)+E(xc) XCENC = 1743.81554787  
PAW double counting = 52181.73956386 -52244.66423826  
entropy T\*S EENTRO = -0.00000000  
eigenvalues EBANDS = -5813.82901369  
atomic energy EATOM = 18704.32991668  
Solvation Ediel\_sol = 0.00000000  
-----  
free energy TOTEN = -1202.76637251 eV  
  
energy without entropy = -1202.76637251 energy(sigma->0) = -1202.76637251

|           |          |         |           |        |
|-----------|----------|---------|-----------|--------|
| POTLOK:   | cpu time | 0.1665: | real time | 0.1675 |
| SETDIJ:   | cpu time | 0.0100: | real time | 0.0101 |
| EDDIAG:   | cpu time | 1.9208: | real time | 1.9271 |
| RMM-DIIS: | cpu time | 4.7375: | real time | 4.7532 |
| ORTHCH:   | cpu time | 0.3511: | real time | 0.3521 |
| DOS:      | cpu time | 0.0004: | real time | 0.0004 |
| CHARGE:   | cpu time | 0.5237: | real time | 0.5253 |
| MIXING:   | cpu time | 0.0095: | real time | 0.0095 |
| -----     |          |         |           |        |
| LOOP:     | cpu time | 7.7196: | real time | 7.7452 |

eigenvalue-minimisations : 1265

total energy-change (2. order) :-0.1115535E-05 (-0.7635501E-09)

number of electron 518.9999721 magnetization 0.9999998

augmentation part 11.7396695 magnetization 0.0542721

Broyden mixing:

rms(total) = 0.41050E-05 rms(broyden)= 0.41030E-05

rms(prec ) = 0.63889E-05

weight for this iteration 100.00

eigenvalues of (default mixing \* dielectric matrix)

average eigenvalue GAMMA= 1.9766

8.1112 5.1214 2.9628 2.5360 2.0549 1.8698 1.1980 1.1980 1.0674 1.0674

0.8853 0.8853 0.7523 0.6711 0.6220 0.6220

Free energy of the ion-electron system (eV)

-----  
alpha Z PSCENC = 233.50077011

Ewald energy TEWEN = 91326.38559271

-Hartree energ DENC = -107334.04451708

-exchange EXHF = 0.00000000

-V(xc)+E(xc) XCENC = 1743.81553701

PAW double counting = 52181.73692633 -52244.66160033

entropy T\*S EENTRO = -0.00000000

eigenvalues EBANDS = -5813.82899905

atomic energy EATOM = 18704.32991668

Solvation Ediel\_sol = 0.00000000

-----  
free energy TOTEN = -1202.76637362 eV

energy without entropy = -1202.76637362 energy(sigma->0) = -1202.76637362

-----

----- Iteration 6( 18) -----

|           |          |         |           |        |
|-----------|----------|---------|-----------|--------|
| POTLOK:   | cpu time | 0.1641: | real time | 0.1649 |
| SETDIJ:   | cpu time | 0.0100: | real time | 0.0101 |
| EDDIAG:   | cpu time | 1.9234: | real time | 1.9295 |
| RMM-DIIS: | cpu time | 4.3713: | real time | 4.3847 |
| ORTHCH:   | cpu time | 0.3535: | real time | 0.3545 |
| DOS:      | cpu time | 0.0004: | real time | 0.0004 |
| CHARGE:   | cpu time | 0.5245: | real time | 0.5262 |
| MIXING:   | cpu time | 0.0097: | real time | 0.0097 |
| -----     |          |         |           |        |
| LOOP:     | cpu time | 7.3569: | real time | 7.3799 |

eigenvalue-minimisations : 1086

total energy-change (2. order) :-0.3313617E-06 (-0.3225162E-09)

number of electron      518.9999721 magnetization      0.9999998

augmentation part      11.7396696 magnetization      0.0542721

Broyden mixing:

rms(total) = 0.25719E-05      rms(broyden)= 0.25710E-05

rms(prec ) = 0.39517E-05

weight for this iteration      100.00

eigenvalues of (default mixing \* dielectric matrix)

average eigenvalue GAMMA=      1.9865

8.2682   5.3904   3.1904   2.4496   2.4496   1.8673   1.3809   1.2120   1.2120   0.9948

0.9948   0.8694   0.8694   0.7111   0.6683   0.6216   0.6216

Free energy of the ion-electron system (eV)

-----

alpha Z      PSCENC =      233.50077011

Ewald energy      TEWEN =      91326.38559271

-Hartree energ DENC =      -107334.04449544

-exchange      EXHF =      0.00000000

-V(xc)+E(xc)      XCENC =      1743.81553178

PAW double counting =      52181.73747278      -52244.66214721

entropy T\*S    EENTRO =        -0.00000000

eigenvalues    EBANDS =       -5813.82901537

atomic energy  EATOM  =       18704.32991668

Solvation    Ediel\_sol  =        0.00000000

-----  
free energy    TOTEN  =       -1202.76637395 eV

energy without entropy =    -1202.76637395    energy(sigma->0) =    -1202.76637395

-----  
----- Iteration        6( 19) -----

POTLOK:    cpu time    0.1655: real time    0.1814

SETDIJ:    cpu time    0.0101: real time    0.0101

EDDIAG:    cpu time    1.9189: real time    1.9257

RMM-DIIS:    cpu time    4.1754: real time    4.1893

ORTHCH: cpu time 0.3527: real time 0.3539

DOS: cpu time 0.0004: real time 0.0004

CHARGE: cpu time 0.5243: real time 0.5261

MIXING: cpu time 0.0104: real time 0.0105

-----

LOOP: cpu time 7.1577: real time 7.1975

eigenvalue-minimisations : 994

total energy-change (2. order) :-0.1415465E-06 (-0.1111546E-09)

number of electron 518.9999721 magnetization 0.9999998

augmentation part 11.7396696 magnetization 0.0542721

Broyden mixing:

rms(total) = 0.14905E-05 rms(broyden)= 0.14899E-05

rms(prec ) = 0.23172E-05

weight for this iteration 100.00

eigenvalues of (default mixing \* dielectric matrix)

average eigenvalue GAMMA= 2.0205

8.4209 5.8132 3.6608 2.5523 2.5523 1.9588 1.5699 1.2577 1.2577 1.0722

1.0722 0.8671 0.8671 0.8633 0.6702 0.6702 0.6218 0.6218

Free energy of the ion-electron system (eV)

-----

alpha Z        PSCENC =        233.50077011

Ewald energy    TEWEN =        91326.38559271

-Hartree energy DENC =    -107334.04446347

-exchange       EXHF =            0.00000000

-V(xc)+E(xc)    XCENC =        1743.81552866

PAW double counting =    52181.73931320    -52244.66398794

entropy T\*S     EENTRO =        -0.00000000

eigenvalues     EBANDS =        -5813.82904405

atomic energy   EATOM =        18704.32991668

Solvation    Ediel\_sol =        0.00000000

-----

free energy     TOTEN =        -1202.76637409 eV

energy without entropy =    -1202.76637409    energy(sigma->0) =    -1202.76637409

-----

----- Iteration 6( 20) -----

POTLOK: cpu time 0.1669: real time 0.1808  
SETDIJ: cpu time 0.0100: real time 0.0101  
EDDIAG: cpu time 1.9281: real time 1.9344  
RMM-DIIS: cpu time 4.1064: real time 4.1358  
ORTHCH: cpu time 0.3528: real time 0.3538  
DOS: cpu time 0.0003: real time 0.0003

-----

LOOP: cpu time 6.5645: real time 6.6151

eigenvalue-minimisations : 954

total energy-change (2. order) :-0.4895992E-07 (-0.1283027E-09)

number of electron 518.9999721 magnetization 0.9999998

augmentation part 11.7396696 magnetization 0.0542721

Free energy of the ion-electron system (eV)

-----

alpha Z PSCENC = 233.50077011

Ewald energy TEWEN = 91326.38559271

-Hartree energ DENC = -107334.04442813

-exchange EXHF = 0.00000000

-V(xc)+E(xc) XCENC = 1743.81552717

PAW double counting = 52181.73957990 -52244.66425486

entropy T\*S EENTRO = -0.00000000

eigenvalues EBANDS = -5813.82907772

atomic energy EATOM = 18704.32991668

Solvation Ediel\_sol = 0.00000000

-----  
free energy TOTEN = -1202.76637414 eV

energy without entropy = -1202.76637414 energy(sigma->0) = -1202.76637414

-----  
average (electrostatic) potential at core

the test charge radii are 0.5201 0.6991 1.0621 0.7215

(the norm of the test charge is 1.0000)

|              |              |              |              |              |
|--------------|--------------|--------------|--------------|--------------|
| 1 -40.7503   | 2 -40.7482   | 3 -40.7496   | 4 -40.7482   | 5 -40.7503   |
| 6 -40.7525   | 7 -40.7501   | 8 -40.7578   | 9 -40.7497   | 10 -40.7573  |
| 11 -40.7511  | 12 -40.7531  | 13 -40.6463  | 14 -40.6932  | 15 -40.7661  |
| 16 -40.6953  | 17 -40.6894  | 18 -40.8581  | 19 -40.6761  | 20 -40.6637  |
| 21 -40.6858  | 22 -40.6589  | 23 -40.0866  | 24 -40.1245  | 25 -57.4562  |
| 26 -57.6671  | 27 -57.6542  | 28 -57.4659  | 29 -57.6603  | 30 -57.4562  |
| 31 -57.6669  | 32 -57.6538  | 33 -57.4639  | 34 -57.6651  | 35 -57.4570  |
| 36 -57.6688  | 37 -57.6538  | 38 -57.4661  | 39 -57.6710  | 40 -57.4561  |
| 41 -57.6728  | 42 -57.6540  | 43 -57.4710  | 44 -57.6855  | 45 -57.4561  |
| 46 -57.6718  | 47 -57.6548  | 48 -57.4713  | 49 -57.6767  | 50 -57.4572  |
| 51 -57.6684  | 52 -57.6546  | 53 -57.4689  | 54 -57.6631  | 55 -57.6339  |
| 56 -57.6599  | 57 -57.6839  | 58 -57.6797  | 59 -57.6636  | 60 -57.6665  |
| 61 -57.6866  | 62 -57.6711  | 63 -57.6342  | 64 -57.6593  | 65 -57.6859  |
| 66 -57.6912  | 67 -57.6618  | 68 -57.6663  | 69 -57.6903  | 70 -57.6973  |
| 71 -57.6337  | 72 -57.6607  | 73 -57.6935  | 74 -57.7180  | 75 -57.6627  |
| 76 -57.6669  | 77 -57.7025  | 78 -57.7468  | 79 -57.6339  | 80 -57.6633  |
| 81 -57.7073  | 82 -57.7485  | 83 -57.6660  | 84 -57.6684  | 85 -57.7338  |
| 86 -57.8369  | 87 -57.6363  | 88 -57.6640  | 89 -57.7092  | 90 -57.7134  |
| 91 -57.6706  | 92 -57.6686  | 93 -57.7386  | 94 -57.7553  | 95 -57.6346  |
| 96 -57.6622  | 97 -57.6929  | 98 -57.6871  | 99 -57.6679  | 100 -57.6674 |
| 101 -57.7044 | 102 -57.6823 | 103 -57.6573 | 104 -57.6278 | 105 -57.6419 |
| 106 -57.2853 | 107 -57.3849 | 108 -57.6282 | 109 -57.5933 | 110 -57.6562 |

|              |              |              |              |              |
|--------------|--------------|--------------|--------------|--------------|
| 111 -57.6278 | 112 -57.6384 | 113 -57.3039 | 114 -57.3905 | 115 -57.6275 |
| 116 -57.5952 | 117 -57.6555 | 118 -57.6196 | 119 -57.6941 | 120 -57.6763 |
| 121 -57.3843 | 122 -57.6263 | 123 -57.7046 | 124 -57.6564 | 125 -57.6222 |
| 126 -57.8276 | 127 -58.3255 | 128 -57.3576 | 129 -57.6315 | 130 -58.1346 |
| 131 -57.6643 | 132 -57.6314 | 133 -57.7950 | 134 -57.4103 | 135 -57.3687 |
| 136 -57.6354 | 137 -58.0695 | 138 -57.6608 | 139 -57.6273 | 140 -57.6674 |
| 141 -57.2944 | 142 -57.3749 | 143 -57.6308 | 144 -57.6434 | 145 -60.8855 |
| 146 -57.3135 | 147 -81.3569 |              |              |              |

E-fermi : -2.3538      XC(G=0): -2.7344      alpha+bet : -2.2521

spin component 1

k-point    1 :        0.0000    0.0000    0.0000

| band No. | band energies | occupation |
|----------|---------------|------------|
| 1        | -27.1578      | 1.00000    |
| 2        | -21.5646      | 1.00000    |
| 3        | -21.4685      | 1.00000    |
| 4        | -21.0941      | 1.00000    |

|    |          |         |
|----|----------|---------|
| 5  | -21.0652 | 1.00000 |
| 6  | -21.0107 | 1.00000 |
| 7  | -20.9758 | 1.00000 |
| 8  | -20.9737 | 1.00000 |
| 9  | -20.8879 | 1.00000 |
| 10 | -20.5514 | 1.00000 |
| 11 | -20.4998 | 1.00000 |
| 12 | -20.4084 | 1.00000 |
| 13 | -20.3951 | 1.00000 |
| 14 | -20.1199 | 1.00000 |
| 15 | -19.9724 | 1.00000 |
| 16 | -19.6953 | 1.00000 |
| 17 | -19.6237 | 1.00000 |
| 18 | -19.5962 | 1.00000 |
| 19 | -19.5806 | 1.00000 |
| 20 | -19.5258 | 1.00000 |
| 21 | -19.5239 | 1.00000 |
| 22 | -19.4955 | 1.00000 |
| 23 | -19.4781 | 1.00000 |
| 24 | -19.1049 | 1.00000 |
| 25 | -19.0715 | 1.00000 |
| 26 | -18.9747 | 1.00000 |

|    |          |         |
|----|----------|---------|
| 27 | -18.9619 | 1.00000 |
| 28 | -18.8948 | 1.00000 |
| 29 | -18.7302 | 1.00000 |
| 30 | -18.4969 | 1.00000 |
| 31 | -18.3555 | 1.00000 |
| 32 | -18.2722 | 1.00000 |
| 33 | -18.2491 | 1.00000 |
| 34 | -18.1799 | 1.00000 |
| 35 | -18.1777 | 1.00000 |
| 36 | -18.0768 | 1.00000 |
| 37 | -18.0731 | 1.00000 |
| 38 | -17.5513 | 1.00000 |
| 39 | -17.3099 | 1.00000 |
| 40 | -17.2839 | 1.00000 |
| 41 | -17.2794 | 1.00000 |
| 42 | -17.2067 | 1.00000 |
| 43 | -17.2007 | 1.00000 |
| 44 | -17.1712 | 1.00000 |
| 45 | -17.0186 | 1.00000 |
| 46 | -16.9470 | 1.00000 |
| 47 | -16.9295 | 1.00000 |
| 48 | -16.8902 | 1.00000 |

|    |          |         |
|----|----------|---------|
| 49 | -16.8884 | 1.00000 |
| 50 | -16.8472 | 1.00000 |
| 51 | -16.8388 | 1.00000 |
| 52 | -16.8173 | 1.00000 |
| 53 | -16.8156 | 1.00000 |
| 54 | -16.7265 | 1.00000 |
| 55 | -16.7233 | 1.00000 |
| 56 | -16.1664 | 1.00000 |
| 57 | -15.7265 | 1.00000 |
| 58 | -15.6891 | 1.00000 |
| 59 | -15.6566 | 1.00000 |
| 60 | -15.6333 | 1.00000 |
| 61 | -15.6134 | 1.00000 |
| 62 | -15.5508 | 1.00000 |
| 63 | -15.5470 | 1.00000 |
| 64 | -15.1670 | 1.00000 |
| 65 | -14.8059 | 1.00000 |
| 66 | -14.6040 | 1.00000 |
| 67 | -14.5753 | 1.00000 |
| 68 | -14.5321 | 1.00000 |
| 69 | -14.4955 | 1.00000 |
| 70 | -14.4652 | 1.00000 |

|    |          |         |
|----|----------|---------|
| 71 | -14.4385 | 1.00000 |
| 72 | -14.3306 | 1.00000 |
| 73 | -14.3025 | 1.00000 |
| 74 | -14.2768 | 1.00000 |
| 75 | -14.2689 | 1.00000 |
| 76 | -14.1798 | 1.00000 |
| 77 | -14.1759 | 1.00000 |
| 78 | -13.8872 | 1.00000 |
| 79 | -13.7551 | 1.00000 |
| 80 | -13.5898 | 1.00000 |
| 81 | -13.5454 | 1.00000 |
| 82 | -13.5265 | 1.00000 |
| 83 | -13.4939 | 1.00000 |
| 84 | -13.4417 | 1.00000 |
| 85 | -13.3614 | 1.00000 |
| 86 | -13.3427 | 1.00000 |
| 87 | -13.1846 | 1.00000 |
| 88 | -12.7832 | 1.00000 |
| 89 | -12.7562 | 1.00000 |
| 90 | -12.7241 | 1.00000 |
| 91 | -12.6933 | 1.00000 |
| 92 | -12.6832 | 1.00000 |

|     |          |         |
|-----|----------|---------|
| 93  | -12.6206 | 1.00000 |
| 94  | -12.4584 | 1.00000 |
| 95  | -12.4437 | 1.00000 |
| 96  | -12.3787 | 1.00000 |
| 97  | -12.3203 | 1.00000 |
| 98  | -12.2103 | 1.00000 |
| 99  | -12.2007 | 1.00000 |
| 100 | -12.1617 | 1.00000 |
| 101 | -11.9523 | 1.00000 |
| 102 | -11.6815 | 1.00000 |
| 103 | -11.6292 | 1.00000 |
| 104 | -11.6083 | 1.00000 |
| 105 | -11.5875 | 1.00000 |
| 106 | -11.1211 | 1.00000 |
| 107 | -11.0844 | 1.00000 |
| 108 | -10.8967 | 1.00000 |
| 109 | -10.8852 | 1.00000 |
| 110 | -10.8304 | 1.00000 |
| 111 | -10.7080 | 1.00000 |
| 112 | -10.6804 | 1.00000 |
| 113 | -10.6604 | 1.00000 |
| 114 | -10.6436 | 1.00000 |

|     |          |         |
|-----|----------|---------|
| 115 | -10.5868 | 1.00000 |
| 116 | -10.5783 | 1.00000 |
| 117 | -10.5683 | 1.00000 |
| 118 | -10.5646 | 1.00000 |
| 119 | -10.5235 | 1.00000 |
| 120 | -10.5226 | 1.00000 |
| 121 | -10.5078 | 1.00000 |
| 122 | -10.5001 | 1.00000 |
| 123 | -10.3753 | 1.00000 |
| 124 | -10.2956 | 1.00000 |
| 125 | -10.2552 | 1.00000 |
| 126 | -10.1852 | 1.00000 |
| 127 | -10.1842 | 1.00000 |
| 128 | -10.1285 | 1.00000 |
| 129 | -10.0662 | 1.00000 |
| 130 | -9.8918  | 1.00000 |
| 131 | -9.8650  | 1.00000 |
| 132 | -9.7958  | 1.00000 |
| 133 | -9.7836  | 1.00000 |
| 134 | -9.7655  | 1.00000 |
| 135 | -9.6993  | 1.00000 |
| 136 | -9.4518  | 1.00000 |

|     |         |         |
|-----|---------|---------|
| 137 | -9.4240 | 1.00000 |
| 138 | -9.3928 | 1.00000 |
| 139 | -9.3856 | 1.00000 |
| 140 | -9.3788 | 1.00000 |
| 141 | -9.3668 | 1.00000 |
| 142 | -9.3093 | 1.00000 |
| 143 | -9.3048 | 1.00000 |
| 144 | -9.2989 | 1.00000 |
| 145 | -9.2844 | 1.00000 |
| 146 | -9.2688 | 1.00000 |
| 147 | -9.0907 | 1.00000 |
| 148 | -9.0030 | 1.00000 |
| 149 | -8.9939 | 1.00000 |
| 150 | -8.9571 | 1.00000 |
| 151 | -8.9543 | 1.00000 |
| 152 | -8.7904 | 1.00000 |
| 153 | -8.7430 | 1.00000 |
| 154 | -8.7313 | 1.00000 |
| 155 | -8.7151 | 1.00000 |
| 156 | -8.7057 | 1.00000 |
| 157 | -8.6842 | 1.00000 |
| 158 | -8.6757 | 1.00000 |

|     |         |         |
|-----|---------|---------|
| 159 | -8.6653 | 1.00000 |
| 160 | -8.6513 | 1.00000 |
| 161 | -8.5918 | 1.00000 |
| 162 | -8.5800 | 1.00000 |
| 163 | -8.5735 | 1.00000 |
| 164 | -8.5651 | 1.00000 |
| 165 | -8.4843 | 1.00000 |
| 166 | -8.4536 | 1.00000 |
| 167 | -8.4331 | 1.00000 |
| 168 | -8.3425 | 1.00000 |
| 169 | -8.2943 | 1.00000 |
| 170 | -8.2721 | 1.00000 |
| 171 | -8.2603 | 1.00000 |
| 172 | -8.2304 | 1.00000 |
| 173 | -8.2294 | 1.00000 |
| 174 | -8.1488 | 1.00000 |
| 175 | -8.1424 | 1.00000 |
| 176 | -8.0751 | 1.00000 |
| 177 | -8.0413 | 1.00000 |
| 178 | -8.0231 | 1.00000 |
| 179 | -8.0185 | 1.00000 |
| 180 | -7.9700 | 1.00000 |

|     |         |         |
|-----|---------|---------|
| 181 | -7.9613 | 1.00000 |
| 182 | -7.9216 | 1.00000 |
| 183 | -7.8976 | 1.00000 |
| 184 | -7.8823 | 1.00000 |
| 185 | -7.8692 | 1.00000 |
| 186 | -7.7981 | 1.00000 |
| 187 | -7.7945 | 1.00000 |
| 188 | -7.7451 | 1.00000 |
| 189 | -7.7074 | 1.00000 |
| 190 | -7.6626 | 1.00000 |
| 191 | -7.5964 | 1.00000 |
| 192 | -7.5815 | 1.00000 |
| 193 | -7.5724 | 1.00000 |
| 194 | -7.5435 | 1.00000 |
| 195 | -7.4777 | 1.00000 |
| 196 | -7.4771 | 1.00000 |
| 197 | -7.4251 | 1.00000 |
| 198 | -7.3207 | 1.00000 |
| 199 | -7.2464 | 1.00000 |
| 200 | -7.1580 | 1.00000 |
| 201 | -7.0633 | 1.00000 |
| 202 | -7.0388 | 1.00000 |

|     |         |         |
|-----|---------|---------|
| 203 | -7.0248 | 1.00000 |
| 204 | -7.0100 | 1.00000 |
| 205 | -6.9934 | 1.00000 |
| 206 | -6.9864 | 1.00000 |
| 207 | -6.9722 | 1.00000 |
| 208 | -6.8634 | 1.00000 |
| 209 | -6.8177 | 1.00000 |
| 210 | -6.7987 | 1.00000 |
| 211 | -6.7900 | 1.00000 |
| 212 | -6.7291 | 1.00000 |
| 213 | -6.6842 | 1.00000 |
| 214 | -6.4672 | 1.00000 |
| 215 | -6.4212 | 1.00000 |
| 216 | -6.3923 | 1.00000 |
| 217 | -6.3881 | 1.00000 |
| 218 | -6.3706 | 1.00000 |
| 219 | -6.3688 | 1.00000 |
| 220 | -6.3136 | 1.00000 |
| 221 | -6.3034 | 1.00000 |
| 222 | -6.2327 | 1.00000 |
| 223 | -6.2267 | 1.00000 |
| 224 | -6.2262 | 1.00000 |

|     |         |         |
|-----|---------|---------|
| 225 | -6.0742 | 1.00000 |
| 226 | -6.0334 | 1.00000 |
| 227 | -5.7889 | 1.00000 |
| 228 | -5.7481 | 1.00000 |
| 229 | -5.6899 | 1.00000 |
| 230 | -5.6382 | 1.00000 |
| 231 | -5.6340 | 1.00000 |
| 232 | -5.5551 | 1.00000 |
| 233 | -5.5274 | 1.00000 |
| 234 | -5.4640 | 1.00000 |
| 235 | -5.4353 | 1.00000 |
| 236 | -5.1632 | 1.00000 |
| 237 | -5.0553 | 1.00000 |
| 238 | -5.0465 | 1.00000 |
| 239 | -5.0148 | 1.00000 |
| 240 | -4.9850 | 1.00000 |
| 241 | -4.9068 | 1.00000 |
| 242 | -4.8503 | 1.00000 |
| 243 | -4.8184 | 1.00000 |
| 244 | -4.7859 | 1.00000 |
| 245 | -4.6788 | 1.00000 |
| 246 | -4.5693 | 1.00000 |

|     |         |         |
|-----|---------|---------|
| 247 | -4.5680 | 1.00000 |
| 248 | -4.5011 | 1.00000 |
| 249 | -4.4424 | 1.00000 |
| 250 | -4.3803 | 1.00000 |
| 251 | -4.2898 | 1.00000 |
| 252 | -4.2613 | 1.00000 |
| 253 | -4.2094 | 1.00000 |
| 254 | -3.5496 | 1.00000 |
| 255 | -3.3513 | 1.00000 |
| 256 | -3.1954 | 1.00000 |
| 257 | -2.9365 | 1.00000 |
| 258 | -2.8450 | 1.00000 |
| 259 | -2.8202 | 1.00000 |
| 260 | -2.6025 | 1.00000 |
| 261 | -1.9059 | 0.00000 |
| 262 | -1.7641 | 0.00000 |
| 263 | -1.7153 | 0.00000 |
| 264 | -1.3409 | 0.00000 |
| 265 | -1.2887 | 0.00000 |
| 266 | -1.1789 | 0.00000 |
| 267 | -0.7413 | 0.00000 |
| 268 | -0.5816 | 0.00000 |

|     |         |         |
|-----|---------|---------|
| 269 | -0.4968 | 0.00000 |
| 270 | -0.3047 | 0.00000 |
| 271 | -0.3024 | 0.00000 |
| 272 | -0.2868 | 0.00000 |
| 273 | -0.1801 | 0.00000 |
| 274 | -0.0549 | 0.00000 |
| 275 | -0.0453 | 0.00000 |
| 276 | -0.0077 | 0.00000 |
| 277 | 0.0380  | 0.00000 |
| 278 | 0.0890  | 0.00000 |
| 279 | 0.1761  | 0.00000 |
| 280 | 0.2235  | 0.00000 |
| 281 | 0.2513  | 0.00000 |
| 282 | 0.4212  | 0.00000 |
| 283 | 0.4519  | 0.00000 |
| 284 | 0.4849  | 0.00000 |
| 285 | 0.5981  | 0.00000 |
| 286 | 0.6796  | 0.00000 |
| 287 | 0.8196  | 0.00000 |
| 288 | 0.8737  | 0.00000 |
| 289 | 1.0469  | 0.00000 |
| 290 | 1.0870  | 0.00000 |

|     |        |         |
|-----|--------|---------|
| 291 | 1.1243 | 0.00000 |
| 292 | 1.1648 | 0.00000 |
| 293 | 1.2237 | 0.00000 |
| 294 | 1.2456 | 0.00000 |
| 295 | 1.2893 | 0.00000 |
| 296 | 1.3148 | 0.00000 |
| 297 | 1.3476 | 0.00000 |
| 298 | 1.4136 | 0.00000 |
| 299 | 1.4681 | 0.00000 |
| 300 | 1.4821 | 0.00000 |
| 301 | 1.5554 | 0.00000 |
| 302 | 1.5878 | 0.00000 |
| 303 | 1.6265 | 0.00000 |
| 304 | 1.6788 | 0.00000 |
| 305 | 1.7520 | 0.00000 |
| 306 | 1.7647 | 0.00000 |
| 307 | 1.8738 | 0.00000 |
| 308 | 1.8982 | 0.00000 |
| 309 | 1.9059 | 0.00000 |
| 310 | 1.9159 | 0.00000 |
| 311 | 2.1193 | 0.00000 |
| 312 | 2.1849 | 0.00000 |

|     |        |         |
|-----|--------|---------|
| 313 | 2.2098 | 0.00000 |
| 314 | 2.2365 | 0.00000 |
| 315 | 2.2765 | 0.00000 |
| 316 | 2.2922 | 0.00000 |
| 317 | 2.3316 | 0.00000 |
| 318 | 2.3551 | 0.00000 |
| 319 | 2.3739 | 0.00000 |
| 320 | 2.3998 | 0.00000 |
| 321 | 2.4225 | 0.00000 |
| 322 | 2.4307 | 0.00000 |
| 323 | 2.4406 | 0.00000 |
| 324 | 2.4531 | 0.00000 |
| 325 | 2.4620 | 0.00000 |
| 326 | 2.5221 | 0.00000 |
| 327 | 2.5369 | 0.00000 |
| 328 | 2.7001 | 0.00000 |
| 329 | 2.7285 | 0.00000 |
| 330 | 2.7546 | 0.00000 |
| 331 | 2.7578 | 0.00000 |
| 332 | 2.7651 | 0.00000 |
| 333 | 2.8174 | 0.00000 |
| 334 | 2.8364 | 0.00000 |

|     |        |         |
|-----|--------|---------|
| 335 | 2.8542 | 0.00000 |
| 336 | 2.8912 | 0.00000 |
| 337 | 2.9246 | 0.00000 |
| 338 | 2.9470 | 0.00000 |
| 339 | 2.9792 | 0.00000 |
| 340 | 3.0057 | 0.00000 |
| 341 | 3.0347 | 0.00000 |
| 342 | 3.0450 | 0.00000 |
| 343 | 3.0663 | 0.00000 |
| 344 | 3.0859 | 0.00000 |
| 345 | 3.1493 | 0.00000 |
| 346 | 3.1628 | 0.00000 |
| 347 | 3.1797 | 0.00000 |
| 348 | 3.1914 | 0.00000 |
| 349 | 3.3008 | 0.00000 |
| 350 | 3.3216 | 0.00000 |
| 351 | 3.3515 | 0.00000 |
| 352 | 3.3668 | 0.00000 |
| 353 | 3.3892 | 0.00000 |
| 354 | 3.4308 | 0.00000 |
| 355 | 3.4753 | 0.00000 |
| 356 | 3.4854 | 0.00000 |

|     |        |         |
|-----|--------|---------|
| 357 | 3.4871 | 0.00000 |
| 358 | 3.5010 | 0.00000 |
| 359 | 3.6339 | 0.00000 |
| 360 | 3.6729 | 0.00000 |
| 361 | 3.6857 | 0.00000 |
| 362 | 3.7302 | 0.00000 |
| 363 | 3.7530 | 0.00000 |
| 364 | 3.7600 | 0.00000 |
| 365 | 3.7724 | 0.00000 |
| 366 | 3.7943 | 0.00000 |
| 367 | 3.8129 | 0.00000 |
| 368 | 3.8355 | 0.00000 |
| 369 | 3.8390 | 0.00000 |
| 370 | 3.8510 | 0.00000 |
| 371 | 3.8773 | 0.00000 |
| 372 | 3.8848 | 0.00000 |
| 373 | 3.9100 | 0.00000 |
| 374 | 3.9250 | 0.00000 |
| 375 | 3.9344 | 0.00000 |
| 376 | 3.9577 | 0.00000 |
| 377 | 3.9732 | 0.00000 |
| 378 | 3.9831 | 0.00000 |

|     |        |         |
|-----|--------|---------|
| 379 | 4.0155 | 0.00000 |
| 380 | 4.0685 | 0.00000 |
| 381 | 4.1640 | 0.00000 |
| 382 | 4.2462 | 0.00000 |
| 383 | 4.2570 | 0.00000 |
| 384 | 4.2586 | 0.00000 |
| 385 | 4.2850 | 0.00000 |
| 386 | 4.3127 | 0.00000 |
| 387 | 4.3279 | 0.00000 |
| 388 | 4.3409 | 0.00000 |
| 389 | 4.3722 | 0.00000 |
| 390 | 4.3819 | 0.00000 |
| 391 | 4.4174 | 0.00000 |
| 392 | 4.4442 | 0.00000 |
| 393 | 4.4686 | 0.00000 |
| 394 | 4.4800 | 0.00000 |
| 395 | 4.4859 | 0.00000 |
| 396 | 4.4966 | 0.00000 |
| 397 | 4.5169 | 0.00000 |
| 398 | 4.5510 | 0.00000 |
| 399 | 4.5907 | 0.00000 |
| 400 | 4.6078 | 0.00000 |

|     |        |         |
|-----|--------|---------|
| 401 | 4.6274 | 0.00000 |
| 402 | 4.6430 | 0.00000 |
| 403 | 4.6568 | 0.00000 |
| 404 | 4.6800 | 0.00000 |
| 405 | 4.7043 | 0.00000 |
| 406 | 4.7317 | 0.00000 |
| 407 | 4.7456 | 0.00000 |
| 408 | 4.7665 | 0.00000 |
| 409 | 4.7828 | 0.00000 |
| 410 | 4.7840 | 0.00000 |
| 411 | 4.7970 | 0.00000 |
| 412 | 4.8274 | 0.00000 |
| 413 | 4.8631 | 0.00000 |
| 414 | 4.8722 | 0.00000 |
| 415 | 4.8977 | 0.00000 |
| 416 | 4.9310 | 0.00000 |
| 417 | 4.9836 | 0.00000 |
| 418 | 5.0044 | 0.00000 |
| 419 | 5.0110 | 0.00000 |
| 420 | 5.0354 | 0.00000 |
| 421 | 5.0395 | 0.00000 |
| 422 | 5.0650 | 0.00000 |

|     |        |         |
|-----|--------|---------|
| 423 | 5.0818 | 0.00000 |
| 424 | 5.1133 | 0.00000 |
| 425 | 5.1174 | 0.00000 |
| 426 | 5.1372 | 0.00000 |
| 427 | 5.1409 | 0.00000 |
| 428 | 5.1555 | 0.00000 |
| 429 | 5.1753 | 0.00000 |
| 430 | 5.1853 | 0.00000 |
| 431 | 5.1886 | 0.00000 |
| 432 | 5.2152 | 0.00000 |
| 433 | 5.2361 | 0.00000 |
| 434 | 5.2405 | 0.00000 |
| 435 | 5.2559 | 0.00000 |
| 436 | 5.2907 | 0.00000 |
| 437 | 5.2965 | 0.00000 |
| 438 | 5.3092 | 0.00000 |
| 439 | 5.3313 | 0.00000 |
| 440 | 5.3498 | 0.00000 |
| 441 | 5.3678 | 0.00000 |
| 442 | 5.3742 | 0.00000 |
| 443 | 5.3943 | 0.00000 |
| 444 | 5.4205 | 0.00000 |

|     |        |         |
|-----|--------|---------|
| 445 | 5.4538 | 0.00000 |
| 446 | 5.4631 | 0.00000 |
| 447 | 5.4816 | 0.00000 |
| 448 | 5.4943 | 0.00000 |
| 449 | 5.5205 | 0.00000 |
| 450 | 5.5505 | 0.00000 |
| 451 | 5.5682 | 0.00000 |
| 452 | 5.5761 | 0.00000 |
| 453 | 5.5954 | 0.00000 |
| 454 | 5.6173 | 0.00000 |
| 455 | 5.6579 | 0.00000 |
| 456 | 5.6817 | 0.00000 |
| 457 | 5.7098 | 0.00000 |
| 458 | 5.7227 | 0.00000 |
| 459 | 5.7437 | 0.00000 |
| 460 | 5.7574 | 0.00000 |
| 461 | 5.7820 | 0.00000 |
| 462 | 5.7907 | 0.00000 |
| 463 | 5.7958 | 0.00000 |
| 464 | 5.8020 | 0.00000 |
| 465 | 5.8074 | 0.00000 |
| 466 | 5.8240 | 0.00000 |

|     |        |         |
|-----|--------|---------|
| 467 | 5.8440 | 0.00000 |
| 468 | 5.8551 | 0.00000 |
| 469 | 5.8753 | 0.00000 |
| 470 | 5.8831 | 0.00000 |
| 471 | 5.8881 | 0.00000 |
| 472 | 5.9119 | 0.00000 |
| 473 | 5.9167 | 0.00000 |
| 474 | 5.9433 | 0.00000 |
| 475 | 5.9561 | 0.00000 |
| 476 | 5.9725 | 0.00000 |
| 477 | 5.9878 | 0.00000 |
| 478 | 6.0096 | 0.00000 |
| 479 | 6.0169 | 0.00000 |
| 480 | 6.0860 | 0.00000 |

spin component 2

k-point 1 : 0.0000 0.0000 0.0000

| band No. | band energies | occupation |
|----------|---------------|------------|
| 1        | -27.1511      | 1.00000    |
| 2        | -21.5634      | 1.00000    |
| 3        | -21.4669      | 1.00000    |

|    |          |         |
|----|----------|---------|
| 4  | -21.0922 | 1.00000 |
| 5  | -21.0643 | 1.00000 |
| 6  | -21.0079 | 1.00000 |
| 7  | -20.9743 | 1.00000 |
| 8  | -20.9719 | 1.00000 |
| 9  | -20.8774 | 1.00000 |
| 10 | -20.5484 | 1.00000 |
| 11 | -20.4964 | 1.00000 |
| 12 | -20.3973 | 1.00000 |
| 13 | -20.3855 | 1.00000 |
| 14 | -20.1156 | 1.00000 |
| 15 | -19.9494 | 1.00000 |
| 16 | -19.6925 | 1.00000 |
| 17 | -19.6224 | 1.00000 |
| 18 | -19.5941 | 1.00000 |
| 19 | -19.5741 | 1.00000 |
| 20 | -19.5245 | 1.00000 |
| 21 | -19.5222 | 1.00000 |
| 22 | -19.4729 | 1.00000 |
| 23 | -19.4587 | 1.00000 |
| 24 | -19.1024 | 1.00000 |
| 25 | -19.0691 | 1.00000 |

|    |          |         |
|----|----------|---------|
| 26 | -18.9647 | 1.00000 |
| 27 | -18.9524 | 1.00000 |
| 28 | -18.8900 | 1.00000 |
| 29 | -18.7007 | 1.00000 |
| 30 | -18.4938 | 1.00000 |
| 31 | -18.3484 | 1.00000 |
| 32 | -18.2440 | 1.00000 |
| 33 | -18.2240 | 1.00000 |
| 34 | -18.1746 | 1.00000 |
| 35 | -18.1723 | 1.00000 |
| 36 | -18.0568 | 1.00000 |
| 37 | -18.0535 | 1.00000 |
| 38 | -17.5479 | 1.00000 |
| 39 | -17.2934 | 1.00000 |
| 40 | -17.2833 | 1.00000 |
| 41 | -17.2702 | 1.00000 |
| 42 | -17.2045 | 1.00000 |
| 43 | -17.2037 | 1.00000 |
| 44 | -17.1682 | 1.00000 |
| 45 | -17.0146 | 1.00000 |
| 46 | -16.9380 | 1.00000 |
| 47 | -16.9190 | 1.00000 |

|    |          |         |
|----|----------|---------|
| 48 | -16.8676 | 1.00000 |
| 49 | -16.8667 | 1.00000 |
| 50 | -16.8263 | 1.00000 |
| 51 | -16.8196 | 1.00000 |
| 52 | -16.8144 | 1.00000 |
| 53 | -16.8122 | 1.00000 |
| 54 | -16.7282 | 1.00000 |
| 55 | -16.7222 | 1.00000 |
| 56 | -16.1637 | 1.00000 |
| 57 | -15.7258 | 1.00000 |
| 58 | -15.6538 | 1.00000 |
| 59 | -15.6394 | 1.00000 |
| 60 | -15.6181 | 1.00000 |
| 61 | -15.5637 | 1.00000 |
| 62 | -15.5250 | 1.00000 |
| 63 | -15.5223 | 1.00000 |
| 64 | -15.1633 | 1.00000 |
| 65 | -14.8037 | 1.00000 |
| 66 | -14.6018 | 1.00000 |
| 67 | -14.5578 | 1.00000 |
| 68 | -14.4974 | 1.00000 |
| 69 | -14.4956 | 1.00000 |

|    |          |         |
|----|----------|---------|
| 70 | -14.4613 | 1.00000 |
| 71 | -14.4343 | 1.00000 |
| 72 | -14.3271 | 1.00000 |
| 73 | -14.2947 | 1.00000 |
| 74 | -14.2651 | 1.00000 |
| 75 | -14.2608 | 1.00000 |
| 76 | -14.1617 | 1.00000 |
| 77 | -14.1583 | 1.00000 |
| 78 | -13.8863 | 1.00000 |
| 79 | -13.7527 | 1.00000 |
| 80 | -13.5870 | 1.00000 |
| 81 | -13.5347 | 1.00000 |
| 82 | -13.5154 | 1.00000 |
| 83 | -13.4904 | 1.00000 |
| 84 | -13.4399 | 1.00000 |
| 85 | -13.3408 | 1.00000 |
| 86 | -13.3382 | 1.00000 |
| 87 | -13.1830 | 1.00000 |
| 88 | -12.7766 | 1.00000 |
| 89 | -12.7467 | 1.00000 |
| 90 | -12.7151 | 1.00000 |
| 91 | -12.6748 | 1.00000 |

|     |          |         |
|-----|----------|---------|
| 92  | -12.6677 | 1.00000 |
| 93  | -12.6184 | 1.00000 |
| 94  | -12.4458 | 1.00000 |
| 95  | -12.4288 | 1.00000 |
| 96  | -12.3752 | 1.00000 |
| 97  | -12.3194 | 1.00000 |
| 98  | -12.2057 | 1.00000 |
| 99  | -12.1955 | 1.00000 |
| 100 | -12.1602 | 1.00000 |
| 101 | -11.9495 | 1.00000 |
| 102 | -11.6785 | 1.00000 |
| 103 | -11.6157 | 1.00000 |
| 104 | -11.5892 | 1.00000 |
| 105 | -11.5772 | 1.00000 |
| 106 | -11.1183 | 1.00000 |
| 107 | -11.0824 | 1.00000 |
| 108 | -10.8876 | 1.00000 |
| 109 | -10.8747 | 1.00000 |
| 110 | -10.8274 | 1.00000 |
| 111 | -10.7019 | 1.00000 |
| 112 | -10.6793 | 1.00000 |
| 113 | -10.6573 | 1.00000 |

|     |          |         |
|-----|----------|---------|
| 114 | -10.6388 | 1.00000 |
| 115 | -10.5787 | 1.00000 |
| 116 | -10.5712 | 1.00000 |
| 117 | -10.5657 | 1.00000 |
| 118 | -10.5617 | 1.00000 |
| 119 | -10.5129 | 1.00000 |
| 120 | -10.5120 | 1.00000 |
| 121 | -10.4987 | 1.00000 |
| 122 | -10.4941 | 1.00000 |
| 123 | -10.3744 | 1.00000 |
| 124 | -10.2945 | 1.00000 |
| 125 | -10.2539 | 1.00000 |
| 126 | -10.1818 | 1.00000 |
| 127 | -10.1806 | 1.00000 |
| 128 | -10.1130 | 1.00000 |
| 129 | -10.0636 | 1.00000 |
| 130 | -9.8890  | 1.00000 |
| 131 | -9.8631  | 1.00000 |
| 132 | -9.7895  | 1.00000 |
| 133 | -9.7745  | 1.00000 |
| 134 | -9.7610  | 1.00000 |
| 135 | -9.6975  | 1.00000 |

|     |         |         |
|-----|---------|---------|
| 136 | -9.4503 | 1.00000 |
| 137 | -9.4205 | 1.00000 |
| 138 | -9.3812 | 1.00000 |
| 139 | -9.3771 | 1.00000 |
| 140 | -9.3718 | 1.00000 |
| 141 | -9.3569 | 1.00000 |
| 142 | -9.3069 | 1.00000 |
| 143 | -9.3024 | 1.00000 |
| 144 | -9.2972 | 1.00000 |
| 145 | -9.2845 | 1.00000 |
| 146 | -9.2458 | 1.00000 |
| 147 | -9.0895 | 1.00000 |
| 148 | -8.9995 | 1.00000 |
| 149 | -8.9904 | 1.00000 |
| 150 | -8.9427 | 1.00000 |
| 151 | -8.9400 | 1.00000 |
| 152 | -8.7879 | 1.00000 |
| 153 | -8.7349 | 1.00000 |
| 154 | -8.7290 | 1.00000 |
| 155 | -8.7096 | 1.00000 |
| 156 | -8.7027 | 1.00000 |
| 157 | -8.6672 | 1.00000 |

|     |         |         |
|-----|---------|---------|
| 158 | -8.6609 | 1.00000 |
| 159 | -8.6535 | 1.00000 |
| 160 | -8.6505 | 1.00000 |
| 161 | -8.5746 | 1.00000 |
| 162 | -8.5684 | 1.00000 |
| 163 | -8.5637 | 1.00000 |
| 164 | -8.5463 | 1.00000 |
| 165 | -8.4839 | 1.00000 |
| 166 | -8.4530 | 1.00000 |
| 167 | -8.4315 | 1.00000 |
| 168 | -8.3397 | 1.00000 |
| 169 | -8.2909 | 1.00000 |
| 170 | -8.2706 | 1.00000 |
| 171 | -8.2300 | 1.00000 |
| 172 | -8.2266 | 1.00000 |
| 173 | -8.2245 | 1.00000 |
| 174 | -8.1387 | 1.00000 |
| 175 | -8.1312 | 1.00000 |
| 176 | -8.0718 | 1.00000 |
| 177 | -8.0392 | 1.00000 |
| 178 | -8.0101 | 1.00000 |
| 179 | -8.0043 | 1.00000 |

|     |         |         |
|-----|---------|---------|
| 180 | -7.9653 | 1.00000 |
| 181 | -7.9564 | 1.00000 |
| 182 | -7.9174 | 1.00000 |
| 183 | -7.8878 | 1.00000 |
| 184 | -7.8685 | 1.00000 |
| 185 | -7.8604 | 1.00000 |
| 186 | -7.7892 | 1.00000 |
| 187 | -7.7851 | 1.00000 |
| 188 | -7.7356 | 1.00000 |
| 189 | -7.6758 | 1.00000 |
| 190 | -7.6327 | 1.00000 |
| 191 | -7.5942 | 1.00000 |
| 192 | -7.5737 | 1.00000 |
| 193 | -7.5514 | 1.00000 |
| 194 | -7.5361 | 1.00000 |
| 195 | -7.4696 | 1.00000 |
| 196 | -7.4695 | 1.00000 |
| 197 | -7.4240 | 1.00000 |
| 198 | -7.3198 | 1.00000 |
| 199 | -7.2331 | 1.00000 |
| 200 | -7.1550 | 1.00000 |
| 201 | -7.0520 | 1.00000 |

|     |         |         |
|-----|---------|---------|
| 202 | -7.0332 | 1.00000 |
| 203 | -7.0130 | 1.00000 |
| 204 | -6.9821 | 1.00000 |
| 205 | -6.9743 | 1.00000 |
| 206 | -6.9691 | 1.00000 |
| 207 | -6.9379 | 1.00000 |
| 208 | -6.8595 | 1.00000 |
| 209 | -6.8134 | 1.00000 |
| 210 | -6.7926 | 1.00000 |
| 211 | -6.7848 | 1.00000 |
| 212 | -6.7223 | 1.00000 |
| 213 | -6.6747 | 1.00000 |
| 214 | -6.4638 | 1.00000 |
| 215 | -6.3914 | 1.00000 |
| 216 | -6.3795 | 1.00000 |
| 217 | -6.3754 | 1.00000 |
| 218 | -6.3595 | 1.00000 |
| 219 | -6.3351 | 1.00000 |
| 220 | -6.2991 | 1.00000 |
| 221 | -6.2724 | 1.00000 |
| 222 | -6.2264 | 1.00000 |
| 223 | -6.2251 | 1.00000 |

|     |         |         |
|-----|---------|---------|
| 224 | -6.2182 | 1.00000 |
| 225 | -6.0436 | 1.00000 |
| 226 | -6.0049 | 1.00000 |
| 227 | -5.7529 | 1.00000 |
| 228 | -5.7074 | 1.00000 |
| 229 | -5.6882 | 1.00000 |
| 230 | -5.6328 | 1.00000 |
| 231 | -5.6195 | 1.00000 |
| 232 | -5.5406 | 1.00000 |
| 233 | -5.5200 | 1.00000 |
| 234 | -5.4375 | 1.00000 |
| 235 | -5.4079 | 1.00000 |
| 236 | -5.1412 | 1.00000 |
| 237 | -5.0569 | 1.00000 |
| 238 | -5.0223 | 1.00000 |
| 239 | -5.0188 | 1.00000 |
| 240 | -4.9553 | 1.00000 |
| 241 | -4.8740 | 1.00000 |
| 242 | -4.8511 | 1.00000 |
| 243 | -4.7988 | 1.00000 |
| 244 | -4.7738 | 1.00000 |
| 245 | -4.6483 | 1.00000 |

|     |         |         |
|-----|---------|---------|
| 246 | -4.5754 | 1.00000 |
| 247 | -4.5724 | 1.00000 |
| 248 | -4.4713 | 1.00000 |
| 249 | -4.4181 | 1.00000 |
| 250 | -4.3914 | 1.00000 |
| 251 | -4.2936 | 1.00000 |
| 252 | -4.2225 | 1.00000 |
| 253 | -4.1720 | 1.00000 |
| 254 | -3.5229 | 1.00000 |
| 255 | -3.3058 | 1.00000 |
| 256 | -3.1359 | 1.00000 |
| 257 | -2.9415 | 1.00000 |
| 258 | -2.7960 | 1.00000 |
| 259 | -2.7364 | 1.00000 |
| 260 | -2.0570 | 0.00000 |
| 261 | -1.9118 | 0.00000 |
| 262 | -1.7189 | 0.00000 |
| 263 | -1.6753 | 0.00000 |
| 264 | -1.2835 | 0.00000 |
| 265 | -1.2644 | 0.00000 |
| 266 | -1.1489 | 0.00000 |
| 267 | -0.7199 | 0.00000 |

|     |         |         |
|-----|---------|---------|
| 268 | -0.5809 | 0.00000 |
| 269 | -0.5044 | 0.00000 |
| 270 | -0.2775 | 0.00000 |
| 271 | -0.2744 | 0.00000 |
| 272 | -0.2566 | 0.00000 |
| 273 | -0.1534 | 0.00000 |
| 274 | -0.0533 | 0.00000 |
| 275 | -0.0449 | 0.00000 |
| 276 | 0.0157  | 0.00000 |
| 277 | 0.0429  | 0.00000 |
| 278 | 0.0838  | 0.00000 |
| 279 | 0.2112  | 0.00000 |
| 280 | 0.2586  | 0.00000 |
| 281 | 0.2829  | 0.00000 |
| 282 | 0.4369  | 0.00000 |
| 283 | 0.4543  | 0.00000 |
| 284 | 0.4858  | 0.00000 |
| 285 | 0.6032  | 0.00000 |
| 286 | 0.6999  | 0.00000 |
| 287 | 0.8224  | 0.00000 |
| 288 | 0.8806  | 0.00000 |
| 289 | 1.0547  | 0.00000 |

|     |        |         |
|-----|--------|---------|
| 290 | 1.1071 | 0.00000 |
| 291 | 1.1446 | 0.00000 |
| 292 | 1.1800 | 0.00000 |
| 293 | 1.2325 | 0.00000 |
| 294 | 1.2514 | 0.00000 |
| 295 | 1.3106 | 0.00000 |
| 296 | 1.3207 | 0.00000 |
| 297 | 1.3614 | 0.00000 |
| 298 | 1.4325 | 0.00000 |
| 299 | 1.4793 | 0.00000 |
| 300 | 1.5005 | 0.00000 |
| 301 | 1.5788 | 0.00000 |
| 302 | 1.6044 | 0.00000 |
| 303 | 1.6556 | 0.00000 |
| 304 | 1.6875 | 0.00000 |
| 305 | 1.7592 | 0.00000 |
| 306 | 1.7751 | 0.00000 |
| 307 | 1.8772 | 0.00000 |
| 308 | 1.9029 | 0.00000 |
| 309 | 1.9092 | 0.00000 |
| 310 | 1.9248 | 0.00000 |
| 311 | 2.1361 | 0.00000 |

|     |        |         |
|-----|--------|---------|
| 312 | 2.1967 | 0.00000 |
| 313 | 2.2214 | 0.00000 |
| 314 | 2.2544 | 0.00000 |
| 315 | 2.2903 | 0.00000 |
| 316 | 2.2968 | 0.00000 |
| 317 | 2.3369 | 0.00000 |
| 318 | 2.3626 | 0.00000 |
| 319 | 2.3846 | 0.00000 |
| 320 | 2.4100 | 0.00000 |
| 321 | 2.4301 | 0.00000 |
| 322 | 2.4361 | 0.00000 |
| 323 | 2.4518 | 0.00000 |
| 324 | 2.4576 | 0.00000 |
| 325 | 2.4684 | 0.00000 |
| 326 | 2.5246 | 0.00000 |
| 327 | 2.5426 | 0.00000 |
| 328 | 2.7053 | 0.00000 |
| 329 | 2.7344 | 0.00000 |
| 330 | 2.7547 | 0.00000 |
| 331 | 2.7603 | 0.00000 |
| 332 | 2.7735 | 0.00000 |
| 333 | 2.8320 | 0.00000 |

|     |        |         |
|-----|--------|---------|
| 334 | 2.8495 | 0.00000 |
| 335 | 2.8673 | 0.00000 |
| 336 | 2.9024 | 0.00000 |
| 337 | 2.9331 | 0.00000 |
| 338 | 2.9565 | 0.00000 |
| 339 | 2.9841 | 0.00000 |
| 340 | 3.0073 | 0.00000 |
| 341 | 3.0386 | 0.00000 |
| 342 | 3.0516 | 0.00000 |
| 343 | 3.0719 | 0.00000 |
| 344 | 3.0935 | 0.00000 |
| 345 | 3.1519 | 0.00000 |
| 346 | 3.1719 | 0.00000 |
| 347 | 3.1882 | 0.00000 |
| 348 | 3.1993 | 0.00000 |
| 349 | 3.3066 | 0.00000 |
| 350 | 3.3262 | 0.00000 |
| 351 | 3.3600 | 0.00000 |
| 352 | 3.3703 | 0.00000 |
| 353 | 3.3924 | 0.00000 |
| 354 | 3.4362 | 0.00000 |
| 355 | 3.4806 | 0.00000 |

|     |        |         |
|-----|--------|---------|
| 356 | 3.4917 | 0.00000 |
| 357 | 3.4961 | 0.00000 |
| 358 | 3.5075 | 0.00000 |
| 359 | 3.6388 | 0.00000 |
| 360 | 3.6768 | 0.00000 |
| 361 | 3.6980 | 0.00000 |
| 362 | 3.7364 | 0.00000 |
| 363 | 3.7567 | 0.00000 |
| 364 | 3.7618 | 0.00000 |
| 365 | 3.7773 | 0.00000 |
| 366 | 3.7992 | 0.00000 |
| 367 | 3.8159 | 0.00000 |
| 368 | 3.8425 | 0.00000 |
| 369 | 3.8474 | 0.00000 |
| 370 | 3.8659 | 0.00000 |
| 371 | 3.8812 | 0.00000 |
| 372 | 3.8944 | 0.00000 |
| 373 | 3.9202 | 0.00000 |
| 374 | 3.9368 | 0.00000 |
| 375 | 3.9495 | 0.00000 |
| 376 | 3.9592 | 0.00000 |
| 377 | 3.9826 | 0.00000 |

|     |        |         |
|-----|--------|---------|
| 378 | 3.9864 | 0.00000 |
| 379 | 4.0216 | 0.00000 |
| 380 | 4.0777 | 0.00000 |
| 381 | 4.1705 | 0.00000 |
| 382 | 4.2580 | 0.00000 |
| 383 | 4.2627 | 0.00000 |
| 384 | 4.2689 | 0.00000 |
| 385 | 4.2928 | 0.00000 |
| 386 | 4.3206 | 0.00000 |
| 387 | 4.3345 | 0.00000 |
| 388 | 4.3502 | 0.00000 |
| 389 | 4.3821 | 0.00000 |
| 390 | 4.3869 | 0.00000 |
| 391 | 4.4231 | 0.00000 |
| 392 | 4.4483 | 0.00000 |
| 393 | 4.4734 | 0.00000 |
| 394 | 4.4831 | 0.00000 |
| 395 | 4.4929 | 0.00000 |
| 396 | 4.4993 | 0.00000 |
| 397 | 4.5201 | 0.00000 |
| 398 | 4.5555 | 0.00000 |
| 399 | 4.5938 | 0.00000 |

|     |        |         |
|-----|--------|---------|
| 400 | 4.6106 | 0.00000 |
| 401 | 4.6292 | 0.00000 |
| 402 | 4.6464 | 0.00000 |
| 403 | 4.6597 | 0.00000 |
| 404 | 4.6858 | 0.00000 |
| 405 | 4.7091 | 0.00000 |
| 406 | 4.7372 | 0.00000 |
| 407 | 4.7508 | 0.00000 |
| 408 | 4.7699 | 0.00000 |
| 409 | 4.7871 | 0.00000 |
| 410 | 4.7889 | 0.00000 |
| 411 | 4.8028 | 0.00000 |
| 412 | 4.8324 | 0.00000 |
| 413 | 4.8677 | 0.00000 |
| 414 | 4.8855 | 0.00000 |
| 415 | 4.9027 | 0.00000 |
| 416 | 4.9417 | 0.00000 |
| 417 | 4.9932 | 0.00000 |
| 418 | 5.0098 | 0.00000 |
| 419 | 5.0135 | 0.00000 |
| 420 | 5.0389 | 0.00000 |
| 421 | 5.0446 | 0.00000 |

|     |        |         |
|-----|--------|---------|
| 422 | 5.0693 | 0.00000 |
| 423 | 5.0861 | 0.00000 |
| 424 | 5.1167 | 0.00000 |
| 425 | 5.1215 | 0.00000 |
| 426 | 5.1412 | 0.00000 |
| 427 | 5.1443 | 0.00000 |
| 428 | 5.1716 | 0.00000 |
| 429 | 5.1800 | 0.00000 |
| 430 | 5.1893 | 0.00000 |
| 431 | 5.1934 | 0.00000 |
| 432 | 5.2202 | 0.00000 |
| 433 | 5.2385 | 0.00000 |
| 434 | 5.2437 | 0.00000 |
| 435 | 5.2616 | 0.00000 |
| 436 | 5.2993 | 0.00000 |
| 437 | 5.3036 | 0.00000 |
| 438 | 5.3123 | 0.00000 |
| 439 | 5.3356 | 0.00000 |
| 440 | 5.3538 | 0.00000 |
| 441 | 5.3719 | 0.00000 |
| 442 | 5.3817 | 0.00000 |
| 443 | 5.3969 | 0.00000 |

|     |        |         |
|-----|--------|---------|
| 444 | 5.4288 | 0.00000 |
| 445 | 5.4599 | 0.00000 |
| 446 | 5.4695 | 0.00000 |
| 447 | 5.4874 | 0.00000 |
| 448 | 5.4986 | 0.00000 |
| 449 | 5.5277 | 0.00000 |
| 450 | 5.5684 | 0.00000 |
| 451 | 5.5745 | 0.00000 |
| 452 | 5.5957 | 0.00000 |
| 453 | 5.6072 | 0.00000 |
| 454 | 5.6271 | 0.00000 |
| 455 | 5.6702 | 0.00000 |
| 456 | 5.6924 | 0.00000 |
| 457 | 5.7192 | 0.00000 |
| 458 | 5.7272 | 0.00000 |
| 459 | 5.7479 | 0.00000 |
| 460 | 5.7624 | 0.00000 |
| 461 | 5.7900 | 0.00000 |
| 462 | 5.7939 | 0.00000 |
| 463 | 5.7987 | 0.00000 |
| 464 | 5.8047 | 0.00000 |
| 465 | 5.8208 | 0.00000 |

|     |        |         |
|-----|--------|---------|
| 466 | 5.8258 | 0.00000 |
| 467 | 5.8557 | 0.00000 |
| 468 | 5.8614 | 0.00000 |
| 469 | 5.8843 | 0.00000 |
| 470 | 5.8888 | 0.00000 |
| 471 | 5.8930 | 0.00000 |
| 472 | 5.9103 | 0.00000 |
| 473 | 5.9251 | 0.00000 |
| 474 | 5.9498 | 0.00000 |
| 475 | 5.9579 | 0.00000 |
| 476 | 5.9749 | 0.00000 |
| 477 | 5.9830 | 0.00000 |
| 478 | 6.0062 | 0.00000 |
| 479 | 6.0238 | 0.00000 |
| 480 | 6.0620 | 0.00000 |

-----

soft charge-density along one line, spin component

1

0

1

2

3

4

5

6

7

8 9

total charge-density along one line

soft charge-density along one line, spin component 2

0 1 2 3 4 5 6 7

8 9

total charge-density along one line

pseudopotential strength for first ion, spin component: 1

-2.331 -4.014 -0.002 0.000 0.000

-4.014 -6.828 -0.006 0.000 -0.000

-0.002 -0.006 -0.336 -0.000 0.000

0.000 0.000 -0.000 -0.341 -0.000

0.000 -0.000 0.000 -0.000 -0.341

pseudopotential strength for first ion, spin component: 2

-2.331 -4.014 -0.002 0.000 0.000

-4.014 -6.828 -0.006 0.000 -0.000

-0.002 -0.006 -0.336 -0.000 0.000

0.000 0.000 -0.000 -0.341 -0.000

0.000 -0.000 0.000 -0.000 -0.341

total augmentation occupancy for first ion, spin component: 1

3.579 -0.646 0.444 -0.034 -0.000

-0.646 0.130 -0.082 0.006 0.000

0.444 -0.082 0.056 -0.003 -0.000

-0.034 0.006 -0.003 0.011 0.000

-0.000 0.000 -0.000 0.000 0.007

total augmentation occupancy for first ion, spin component: 2

-0.000 0.000 -0.000 0.000 0.000

0.000 -0.000 0.000 -0.000 -0.000

-0.000 0.000 -0.000 -0.000 -0.000

0.000 -0.000 -0.000 -0.000 -0.000

0.000 -0.000 -0.000 -0.000 -0.000

----- aborting loop because EDIFF is reached -----

total charge

# of ion s p d tot

-----

|    |       |       |       |       |
|----|-------|-------|-------|-------|
| 1  | 0.646 | 0.043 | 0.000 | 0.690 |
| 2  | 0.646 | 0.043 | 0.000 | 0.690 |
| 3  | 0.646 | 0.043 | 0.000 | 0.690 |
| 4  | 0.646 | 0.043 | 0.000 | 0.690 |
| 5  | 0.646 | 0.043 | 0.000 | 0.690 |
| 6  | 0.646 | 0.043 | 0.000 | 0.690 |
| 7  | 0.646 | 0.043 | 0.000 | 0.690 |
| 8  | 0.646 | 0.043 | 0.000 | 0.690 |
| 9  | 0.646 | 0.043 | 0.000 | 0.690 |
| 10 | 0.646 | 0.043 | 0.000 | 0.690 |
| 11 | 0.646 | 0.043 | 0.000 | 0.690 |
| 12 | 0.646 | 0.043 | 0.000 | 0.690 |
| 13 | 0.646 | 0.043 | 0.000 | 0.689 |
| 14 | 0.646 | 0.043 | 0.000 | 0.689 |
| 15 | 0.648 | 0.045 | 0.000 | 0.693 |
| 16 | 0.646 | 0.043 | 0.000 | 0.689 |
| 17 | 0.646 | 0.043 | 0.000 | 0.689 |
| 18 | 0.646 | 0.043 | 0.000 | 0.689 |
| 19 | 0.646 | 0.043 | 0.000 | 0.689 |
| 20 | 0.646 | 0.043 | 0.000 | 0.689 |
| 21 | 0.646 | 0.043 | 0.000 | 0.689 |
| 22 | 0.646 | 0.044 | 0.000 | 0.690 |

|    |       |       |       |       |
|----|-------|-------|-------|-------|
| 23 | 0.541 | 0.015 | 0.000 | 0.557 |
| 24 | 0.541 | 0.015 | 0.000 | 0.556 |
| 25 | 0.870 | 1.763 | 0.000 | 2.633 |
| 26 | 0.867 | 1.785 | 0.000 | 2.653 |
| 27 | 0.867 | 1.786 | 0.000 | 2.653 |
| 28 | 0.870 | 1.762 | 0.000 | 2.632 |
| 29 | 0.865 | 1.783 | 0.000 | 2.648 |
| 30 | 0.870 | 1.763 | 0.000 | 2.633 |
| 31 | 0.867 | 1.786 | 0.000 | 2.653 |
| 32 | 0.867 | 1.786 | 0.000 | 2.653 |
| 33 | 0.870 | 1.762 | 0.000 | 2.632 |
| 34 | 0.865 | 1.783 | 0.000 | 2.648 |
| 35 | 0.870 | 1.763 | 0.000 | 2.633 |
| 36 | 0.868 | 1.787 | 0.000 | 2.654 |
| 37 | 0.867 | 1.786 | 0.000 | 2.653 |
| 38 | 0.870 | 1.763 | 0.000 | 2.633 |
| 39 | 0.865 | 1.784 | 0.000 | 2.649 |
| 40 | 0.870 | 1.763 | 0.000 | 2.633 |
| 41 | 0.868 | 1.787 | 0.000 | 2.655 |
| 42 | 0.867 | 1.786 | 0.000 | 2.653 |
| 43 | 0.871 | 1.764 | 0.000 | 2.634 |
| 44 | 0.865 | 1.783 | 0.000 | 2.648 |

|    |       |       |       |       |
|----|-------|-------|-------|-------|
| 45 | 0.870 | 1.763 | 0.000 | 2.633 |
| 46 | 0.867 | 1.786 | 0.000 | 2.653 |
| 47 | 0.867 | 1.786 | 0.000 | 2.653 |
| 48 | 0.871 | 1.763 | 0.000 | 2.634 |
| 49 | 0.865 | 1.783 | 0.000 | 2.648 |
| 50 | 0.870 | 1.763 | 0.000 | 2.633 |
| 51 | 0.867 | 1.786 | 0.000 | 2.653 |
| 52 | 0.867 | 1.786 | 0.000 | 2.653 |
| 53 | 0.870 | 1.762 | 0.000 | 2.632 |
| 54 | 0.865 | 1.784 | 0.000 | 2.648 |
| 55 | 0.865 | 1.784 | 0.000 | 2.649 |
| 56 | 0.865 | 1.786 | 0.000 | 2.651 |
| 57 | 0.866 | 1.787 | 0.000 | 2.653 |
| 58 | 0.866 | 1.790 | 0.000 | 2.656 |
| 59 | 0.865 | 1.786 | 0.000 | 2.651 |
| 60 | 0.866 | 1.786 | 0.000 | 2.651 |
| 61 | 0.866 | 1.788 | 0.000 | 2.654 |
| 62 | 0.867 | 1.791 | 0.000 | 2.658 |
| 63 | 0.865 | 1.784 | 0.000 | 2.649 |
| 64 | 0.865 | 1.786 | 0.000 | 2.651 |
| 65 | 0.866 | 1.787 | 0.000 | 2.652 |
| 66 | 0.865 | 1.788 | 0.000 | 2.653 |

|    |       |       |       |       |
|----|-------|-------|-------|-------|
| 67 | 0.865 | 1.786 | 0.000 | 2.651 |
| 68 | 0.866 | 1.785 | 0.000 | 2.651 |
| 69 | 0.865 | 1.787 | 0.000 | 2.652 |
| 70 | 0.866 | 1.787 | 0.000 | 2.653 |
| 71 | 0.865 | 1.784 | 0.000 | 2.649 |
| 72 | 0.865 | 1.786 | 0.000 | 2.651 |
| 73 | 0.866 | 1.786 | 0.000 | 2.652 |
| 74 | 0.864 | 1.785 | 0.000 | 2.649 |
| 75 | 0.865 | 1.786 | 0.000 | 2.651 |
| 76 | 0.866 | 1.786 | 0.000 | 2.651 |
| 77 | 0.865 | 1.786 | 0.000 | 2.651 |
| 78 | 0.865 | 1.784 | 0.000 | 2.649 |
| 79 | 0.865 | 1.784 | 0.000 | 2.649 |
| 80 | 0.865 | 1.786 | 0.000 | 2.651 |
| 81 | 0.865 | 1.785 | 0.000 | 2.650 |
| 82 | 0.863 | 1.782 | 0.000 | 2.645 |
| 83 | 0.865 | 1.786 | 0.000 | 2.651 |
| 84 | 0.866 | 1.786 | 0.000 | 2.651 |
| 85 | 0.865 | 1.784 | 0.000 | 2.648 |
| 86 | 0.862 | 1.774 | 0.000 | 2.636 |
| 87 | 0.865 | 1.784 | 0.000 | 2.649 |
| 88 | 0.865 | 1.787 | 0.000 | 2.652 |

|     |       |       |       |       |
|-----|-------|-------|-------|-------|
| 89  | 0.865 | 1.785 | 0.000 | 2.650 |
| 90  | 0.865 | 1.788 | 0.000 | 2.653 |
| 91  | 0.865 | 1.786 | 0.000 | 2.651 |
| 92  | 0.866 | 1.786 | 0.000 | 2.651 |
| 93  | 0.864 | 1.783 | 0.000 | 2.647 |
| 94  | 0.866 | 1.785 | 0.000 | 2.651 |
| 95  | 0.865 | 1.784 | 0.000 | 2.649 |
| 96  | 0.865 | 1.786 | 0.000 | 2.651 |
| 97  | 0.866 | 1.787 | 0.000 | 2.653 |
| 98  | 0.866 | 1.789 | 0.000 | 2.655 |
| 99  | 0.865 | 1.786 | 0.000 | 2.651 |
| 100 | 0.866 | 1.786 | 0.000 | 2.651 |
| 101 | 0.865 | 1.787 | 0.000 | 2.652 |
| 102 | 0.867 | 1.790 | 0.000 | 2.657 |
| 103 | 0.865 | 1.786 | 0.000 | 2.651 |
| 104 | 0.867 | 1.785 | 0.000 | 2.653 |
| 105 | 0.866 | 1.786 | 0.000 | 2.652 |
| 106 | 0.870 | 1.778 | 0.000 | 2.648 |
| 107 | 0.869 | 1.765 | 0.000 | 2.635 |
| 108 | 0.865 | 1.783 | 0.000 | 2.648 |
| 109 | 0.869 | 1.789 | 0.000 | 2.658 |
| 110 | 0.865 | 1.786 | 0.000 | 2.651 |

|     |       |       |       |       |
|-----|-------|-------|-------|-------|
| 111 | 0.867 | 1.785 | 0.000 | 2.653 |
| 112 | 0.867 | 1.789 | 0.000 | 2.655 |
| 113 | 0.871 | 1.782 | 0.000 | 2.653 |
| 114 | 0.869 | 1.765 | 0.000 | 2.634 |
| 115 | 0.865 | 1.783 | 0.000 | 2.648 |
| 116 | 0.870 | 1.791 | 0.000 | 2.661 |
| 117 | 0.865 | 1.786 | 0.000 | 2.651 |
| 118 | 0.867 | 1.786 | 0.000 | 2.653 |
| 119 | 0.865 | 1.782 | 0.000 | 2.647 |
| 120 | 0.857 | 1.707 | 0.000 | 2.564 |
| 121 | 0.869 | 1.765 | 0.000 | 2.634 |
| 122 | 0.865 | 1.783 | 0.000 | 2.648 |
| 123 | 0.866 | 1.778 | 0.000 | 2.644 |
| 124 | 0.866 | 1.786 | 0.000 | 2.652 |
| 125 | 0.867 | 1.785 | 0.000 | 2.653 |
| 126 | 0.862 | 1.776 | 0.000 | 2.638 |
| 127 | 0.847 | 1.824 | 0.000 | 2.671 |
| 128 | 0.870 | 1.767 | 0.000 | 2.637 |
| 129 | 0.865 | 1.783 | 0.000 | 2.648 |
| 130 | 0.860 | 1.757 | 0.000 | 2.617 |
| 131 | 0.866 | 1.786 | 0.000 | 2.652 |
| 132 | 0.867 | 1.784 | 0.000 | 2.652 |

|     |       |       |       |       |
|-----|-------|-------|-------|-------|
| 133 | 0.864 | 1.787 | 0.000 | 2.651 |
| 134 | 0.869 | 1.790 | 0.000 | 2.659 |
| 135 | 0.869 | 1.767 | 0.000 | 2.636 |
| 136 | 0.865 | 1.783 | 0.000 | 2.648 |
| 137 | 0.866 | 1.772 | 0.000 | 2.638 |
| 138 | 0.866 | 1.786 | 0.000 | 2.652 |
| 139 | 0.867 | 1.785 | 0.000 | 2.652 |
| 140 | 0.866 | 1.788 | 0.000 | 2.654 |
| 141 | 0.870 | 1.779 | 0.000 | 2.649 |
| 142 | 0.869 | 1.766 | 0.000 | 2.635 |
| 143 | 0.865 | 1.783 | 0.000 | 2.648 |
| 144 | 0.869 | 1.790 | 0.000 | 2.659 |
| 145 | 0.944 | 1.724 | 0.000 | 2.668 |
| 146 | 1.240 | 1.546 | 0.074 | 2.860 |
| 147 | 1.635 | 3.537 | 0.000 | 5.173 |

-----

tot            123.064 221.559    0.074 344.697

magnetization (x)

| # of ion | s      | p      | d     | tot    |
|----------|--------|--------|-------|--------|
| 1        | 0.000  | -0.000 | 0.000 | 0.000  |
| 2        | -0.000 | 0.000  | 0.000 | -0.000 |
| 3        | 0.000  | -0.000 | 0.000 | 0.000  |
| 4        | -0.000 | 0.000  | 0.000 | -0.000 |
| 5        | 0.000  | -0.000 | 0.000 | 0.000  |
| 6        | -0.000 | 0.000  | 0.000 | -0.000 |
| 7        | 0.000  | -0.000 | 0.000 | 0.000  |
| 8        | -0.000 | 0.000  | 0.000 | -0.000 |
| 9        | 0.000  | -0.000 | 0.000 | 0.000  |
| 10       | -0.000 | 0.000  | 0.000 | -0.000 |
| 11       | 0.000  | -0.000 | 0.000 | 0.000  |
| 12       | -0.000 | 0.000  | 0.000 | -0.000 |
| 13       | 0.000  | -0.000 | 0.000 | 0.000  |
| 14       | -0.004 | 0.002  | 0.000 | -0.002 |
| 15       | 0.000  | -0.000 | 0.000 | 0.000  |
| 16       | -0.004 | 0.002  | 0.000 | -0.002 |
| 17       | -0.004 | 0.002  | 0.000 | -0.002 |
| 18       | 0.000  | -0.000 | 0.000 | 0.000  |
| 19       | -0.003 | 0.001  | 0.000 | -0.002 |
| 20       | 0.000  | -0.000 | 0.000 | 0.000  |

|    |        |        |       |        |
|----|--------|--------|-------|--------|
| 21 | -0.003 | 0.002  | 0.000 | -0.002 |
| 22 | -0.003 | 0.002  | 0.000 | -0.002 |
| 23 | -0.000 | 0.000  | 0.000 | -0.000 |
| 24 | -0.000 | 0.000  | 0.000 | -0.000 |
| 25 | -0.000 | -0.007 | 0.000 | -0.008 |
| 26 | -0.000 | -0.002 | 0.000 | -0.002 |
| 27 | 0.000  | 0.003  | 0.000 | 0.003  |
| 28 | 0.000  | 0.005  | 0.000 | 0.005  |
| 29 | 0.000  | 0.003  | 0.000 | 0.003  |
| 30 | -0.000 | -0.007 | 0.000 | -0.008 |
| 31 | -0.000 | -0.002 | 0.000 | -0.002 |
| 32 | 0.000  | 0.003  | 0.000 | 0.003  |
| 33 | 0.000  | 0.005  | 0.000 | 0.005  |
| 34 | 0.000  | 0.002  | 0.000 | 0.002  |
| 35 | -0.000 | -0.007 | 0.000 | -0.008 |
| 36 | -0.000 | -0.002 | 0.000 | -0.002 |
| 37 | 0.000  | 0.003  | 0.000 | 0.003  |
| 38 | 0.000  | 0.006  | 0.000 | 0.007  |
| 39 | 0.000  | 0.002  | 0.000 | 0.002  |
| 40 | -0.000 | -0.007 | 0.000 | -0.008 |
| 41 | -0.000 | -0.002 | 0.000 | -0.002 |
| 42 | 0.000  | 0.002  | 0.000 | 0.003  |

|    |        |        |       |        |
|----|--------|--------|-------|--------|
| 43 | 0.000  | 0.005  | 0.000 | 0.005  |
| 44 | 0.000  | 0.004  | 0.000 | 0.004  |
| 45 | -0.000 | -0.007 | 0.000 | -0.008 |
| 46 | -0.000 | -0.002 | 0.000 | -0.002 |
| 47 | 0.000  | 0.002  | 0.000 | 0.003  |
| 48 | 0.000  | 0.005  | 0.000 | 0.006  |
| 49 | 0.000  | 0.001  | 0.000 | 0.001  |
| 50 | -0.000 | -0.007 | 0.000 | -0.008 |
| 51 | -0.000 | -0.002 | 0.000 | -0.002 |
| 52 | 0.000  | 0.002  | 0.000 | 0.003  |
| 53 | 0.000  | 0.006  | 0.000 | 0.007  |
| 54 | 0.000  | 0.002  | 0.000 | 0.002  |
| 55 | -0.000 | -0.005 | 0.000 | -0.006 |
| 56 | -0.000 | -0.007 | 0.000 | -0.007 |
| 57 | -0.000 | -0.001 | 0.000 | -0.001 |
| 58 | -0.000 | -0.001 | 0.000 | -0.001 |
| 59 | 0.000  | 0.006  | 0.000 | 0.007  |
| 60 | 0.000  | 0.003  | 0.000 | 0.003  |
| 61 | 0.000  | 0.001  | 0.000 | 0.001  |
| 62 | 0.000  | 0.003  | 0.000 | 0.003  |
| 63 | -0.000 | -0.005 | 0.000 | -0.006 |
| 64 | -0.000 | -0.007 | 0.000 | -0.007 |

|    |        |        |       |        |
|----|--------|--------|-------|--------|
| 65 | -0.000 | -0.001 | 0.000 | -0.001 |
| 66 | -0.000 | -0.001 | 0.000 | -0.001 |
| 67 | 0.000  | 0.006  | 0.000 | 0.006  |
| 68 | 0.000  | 0.003  | 0.000 | 0.003  |
| 69 | 0.000  | 0.001  | 0.000 | 0.001  |
| 70 | 0.000  | 0.002  | 0.000 | 0.002  |
| 71 | -0.000 | -0.005 | 0.000 | -0.006 |
| 72 | -0.000 | -0.007 | 0.000 | -0.007 |
| 73 | -0.000 | -0.001 | 0.000 | -0.001 |
| 74 | -0.000 | -0.002 | 0.000 | -0.002 |
| 75 | 0.000  | 0.006  | 0.000 | 0.007  |
| 76 | 0.000  | 0.003  | 0.000 | 0.004  |
| 77 | 0.000  | 0.003  | 0.000 | 0.003  |
| 78 | 0.000  | 0.001  | 0.000 | 0.001  |
| 79 | -0.000 | -0.005 | 0.000 | -0.006 |
| 80 | -0.000 | -0.007 | 0.000 | -0.007 |
| 81 | -0.000 | -0.001 | 0.000 | -0.002 |
| 82 | -0.000 | -0.002 | 0.000 | -0.002 |
| 83 | 0.001  | 0.007  | 0.000 | 0.008  |
| 84 | 0.000  | 0.003  | 0.000 | 0.003  |
| 85 | 0.000  | 0.002  | 0.000 | 0.002  |
| 86 | 0.000  | 0.005  | 0.000 | 0.006  |

|     |        |        |       |        |
|-----|--------|--------|-------|--------|
| 87  | -0.000 | -0.005 | 0.000 | -0.005 |
| 88  | -0.000 | -0.007 | 0.000 | -0.007 |
| 89  | -0.000 | -0.001 | 0.000 | -0.002 |
| 90  | -0.000 | -0.002 | 0.000 | -0.002 |
| 91  | 0.001  | 0.008  | 0.000 | 0.008  |
| 92  | 0.000  | 0.003  | 0.000 | 0.003  |
| 93  | 0.000  | 0.002  | 0.000 | 0.003  |
| 94  | 0.000  | 0.001  | 0.000 | 0.001  |
| 95  | -0.000 | -0.005 | 0.000 | -0.006 |
| 96  | -0.000 | -0.007 | 0.000 | -0.007 |
| 97  | -0.000 | -0.001 | 0.000 | -0.001 |
| 98  | -0.000 | -0.001 | 0.000 | -0.001 |
| 99  | 0.001  | 0.007  | 0.000 | 0.007  |
| 100 | 0.000  | 0.003  | 0.000 | 0.004  |
| 101 | 0.000  | 0.003  | 0.000 | 0.003  |
| 102 | 0.000  | 0.002  | 0.000 | 0.002  |
| 103 | -0.001 | -0.010 | 0.000 | -0.011 |
| 104 | -0.003 | -0.028 | 0.000 | -0.031 |
| 105 | -0.000 | -0.001 | 0.000 | -0.002 |
| 106 | -0.000 | -0.004 | 0.000 | -0.005 |
| 107 | 0.007  | 0.115  | 0.000 | 0.122  |
| 108 | 0.001  | 0.010  | 0.000 | 0.011  |

|     |        |        |       |        |
|-----|--------|--------|-------|--------|
| 109 | 0.000  | 0.001  | 0.000 | 0.001  |
| 110 | -0.001 | -0.010 | 0.000 | -0.011 |
| 111 | -0.003 | -0.028 | 0.000 | -0.031 |
| 112 | -0.000 | -0.001 | 0.000 | -0.002 |
| 113 | -0.000 | -0.003 | 0.000 | -0.004 |
| 114 | 0.007  | 0.120  | 0.000 | 0.127  |
| 115 | 0.001  | 0.010  | 0.000 | 0.011  |
| 116 | 0.000  | 0.001  | 0.000 | 0.002  |
| 117 | -0.001 | -0.010 | 0.000 | -0.011 |
| 118 | -0.003 | -0.026 | 0.000 | -0.029 |
| 119 | -0.000 | -0.002 | 0.000 | -0.002 |
| 120 | -0.000 | -0.002 | 0.000 | -0.002 |
| 121 | 0.007  | 0.115  | 0.000 | 0.122  |
| 122 | 0.001  | 0.010  | 0.000 | 0.010  |
| 123 | 0.000  | 0.003  | 0.000 | 0.003  |
| 124 | -0.001 | -0.010 | 0.000 | -0.011 |
| 125 | -0.003 | -0.024 | 0.000 | -0.027 |
| 126 | -0.000 | -0.002 | 0.000 | -0.002 |
| 127 | -0.000 | 0.001  | 0.000 | 0.001  |
| 128 | 0.006  | 0.105  | 0.000 | 0.111  |
| 129 | 0.001  | 0.009  | 0.000 | 0.010  |
| 130 | 0.000  | 0.004  | 0.000 | 0.004  |

|     |        |        |        |        |
|-----|--------|--------|--------|--------|
| 131 | -0.001 | -0.009 | 0.000  | -0.010 |
| 132 | -0.003 | -0.024 | 0.000  | -0.027 |
| 133 | -0.000 | -0.002 | 0.000  | -0.002 |
| 134 | -0.000 | -0.002 | 0.000  | -0.002 |
| 135 | 0.006  | 0.097  | 0.000  | 0.102  |
| 136 | 0.001  | 0.009  | 0.000  | 0.010  |
| 137 | 0.000  | 0.004  | 0.000  | 0.005  |
| 138 | -0.001 | -0.010 | 0.000  | -0.011 |
| 139 | -0.003 | -0.026 | 0.000  | -0.029 |
| 140 | -0.000 | -0.002 | 0.000  | -0.002 |
| 141 | -0.000 | -0.003 | 0.000  | -0.004 |
| 142 | 0.006  | 0.105  | 0.000  | 0.111  |
| 143 | 0.001  | 0.010  | 0.000  | 0.010  |
| 144 | 0.000  | 0.002  | 0.000  | 0.003  |
| 145 | 0.000  | 0.005  | 0.000  | 0.006  |
| 146 | -0.000 | 0.000  | -0.000 | 0.000  |
| 147 | 0.000  | 0.004  | 0.000  | 0.004  |

-----

|     |       |       |        |       |
|-----|-------|-------|--------|-------|
| tot | 0.001 | 0.513 | -0.000 | 0.514 |
|-----|-------|-------|--------|-------|

CHARGE:  cpu time      0.5221: real time      0.5239

FORLOC:  cpu time      0.0200: real time      0.0201

FORNL : cpu time 2.0736: real time 2.0802  
 STRESS: cpu time 6.2289: real time 6.2524  
 FORCOR: cpu time 0.1416: real time 0.1425  
 FORHAR: cpu time 0.0332: real time 0.0332  
 MIXING: cpu time 0.0111: real time 0.0111  
 OFIELD: cpu time 0.0001: real time 0.0001

-----

DFTD3 V3.0 Rev 1

Edisp (eV) -6.61788

E6 (eV): -3.9312

E8 (eV): -2.6867

% E8 : 40.60

FORVDW: cpu time 1.8660: real time 1.8870

FORCE on cell =-STRESS in cart. coord. units (eV):

|           |    |    |    |    |    |    |
|-----------|----|----|----|----|----|----|
| Direction | XX | YY | ZZ | XY | YZ | ZX |
|-----------|----|----|----|----|----|----|

-----

Alpha Z 233.50077 233.50077 233.50077

Ewald 107574.75723 23474.38913-39722.89083 10.33575 3456.73956 128.46657

|                     |              |              |                 |          |             |            |
|---------------------|--------------|--------------|-----------------|----------|-------------|------------|
| Hartree             | 106095.11356 | 25028.80123  | -23789.87054    | -6.54886 | 2948.09852  | 93.12870   |
| E(xc)               | -1914.26059  | -1916.60262  | -1979.91978     | 0.13381  | 1.82311     | 0.12901    |
| Local               | *****        | -53951.14416 | 57006.55993     | -0.30975 | -6362.72245 | -218.15919 |
| n-local             | -472.68663   | -482.59179   | -439.52821      | -0.69625 | -0.75328    | -0.32285   |
| augment             | -38.26865    | -38.61240    | -34.28570       | 0.00591  | -0.97678    | 0.00065    |
| Kinetic             | 7635.33750   | 7638.72520   | 8714.09441      | -3.10619 | -41.49768   | -3.16743   |
| Fock                | 0.00000      | 0.00000      | 0.00000         | 0.00000  | 0.00000     | 0.00000    |
| vdW                 | -2.64320     | -1.49329     | -6.59299        | 0.00160  | -0.07448    | 0.01160    |
| -----               |              |              |                 |          |             |            |
| Total               | -17.74740    | -15.02793    | -18.93295       | -0.18399 | 0.63651     | 0.08707    |
| in kB               | -4.89394     | -4.14403     | -5.22087        | -0.05074 | 0.17552     | 0.02401    |
| external pressure = |              | -4.75 kB     | Pullay stress = |          | 0.00 kB     |            |

VOLUME and BASIS-vectors are now :

-----

energy-cutoff : 400.00

volume of cell : 5810.14

| direct lattice vectors |             |             | reciprocal lattice vectors |             |             |
|------------------------|-------------|-------------|----------------------------|-------------|-------------|
| 14.78060000            | 0.00000000  | 0.00000000  | 0.067656252                | 0.00000000  | 0.00000000  |
| 0.00000000             | 21.33390000 | 0.00000000  | 0.00000000                 | 0.046873755 | 0.00000000  |
| 0.00000000             | 0.00000000  | 18.42570000 | 0.00000000                 | 0.00000000  | 0.054272022 |

length of vectors

14.780600000 21.333900000 18.425700000 0.067656252 0.046873755 0.054272022

FORCES acting on ions

electron-ion (+dipol)

ewald-force

non-local-force

convergence-correction

-----

|           |           |           |           |           |           |           |           |   |
|-----------|-----------|-----------|-----------|-----------|-----------|-----------|-----------|---|
| 0.468E-02 | 0.154E+03 | 0.361E+02 | -.317E-02 | -.160E+03 | -.357E+02 | -.180E-02 | 0.566E+01 | - |
| .438E+00  | 0.164E-06 | 0.464E-06 | 0.706E-06 |           |           |           |           |   |
| -.185E-01 | 0.155E+03 | -.340E+02 | 0.161E-01 | -.160E+03 | 0.335E+02 | 0.115E-02 | 0.565E+01 |   |
| 0.541E+00 | -.509E-06 | -.122E-06 | -.142E-06 |           |           |           |           |   |
| 0.184E+00 | 0.154E+03 | 0.360E+02 | -.184E+00 | -.160E+03 | -.356E+02 | 0.933E-05 | 0.565E+01 | - |
| .443E+00  | -.233E-06 | 0.602E-06 | 0.464E-06 |           |           |           |           |   |
| 0.112E+00 | 0.155E+03 | -.341E+02 | -.988E-01 | -.160E+03 | 0.336E+02 | -.175E-01 | 0.565E+01 |   |
| 0.535E+00 | -.793E-07 | 0.154E-06 | -.393E-06 |           |           |           |           |   |
| 0.171E+00 | 0.154E+03 | 0.362E+02 | -.173E+00 | -.160E+03 | -.357E+02 | 0.117E-02 | 0.566E+01 | - |
| .440E+00  | -.387E-06 | 0.670E-06 | 0.738E-06 |           |           |           |           |   |
| 0.126E+00 | 0.154E+03 | -.340E+02 | -.108E+00 | -.160E+03 | 0.334E+02 | -.211E-01 | 0.565E+01 |   |
| 0.541E+00 | 0.383E-06 | 0.267E-06 | 0.278E-06 |           |           |           |           |   |
| -.193E-01 | 0.154E+03 | 0.363E+02 | 0.182E-01 | -.160E+03 | -.359E+02 | 0.159E-02 | 0.566E+01 | - |

.431E+00 -.173E-06 0.633E-06 0.125E-05  
-.129E-01 0.154E+03 -.338E+02 0.198E-01 -.160E+03 0.332E+02 -.719E-02 0.565E+01  
0.555E+00 0.475E-06 0.355E-06 0.115E-05  
-.182E+00 0.154E+03 0.363E+02 0.182E+00 -.160E+03 -.359E+02 0.255E-03 0.566E+01 -  
.429E+00 0.218E-06 0.539E-06 0.147E-05  
-.128E+00 0.155E+03 -.337E+02 0.115E+00 -.160E+03 0.331E+02 0.109E-01 0.565E+01  
0.561E+00 0.684E-07 0.993E-07 0.140E-05  
-.174E+00 0.154E+03 0.362E+02 0.175E+00 -.160E+03 -.358E+02 -.177E-02 0.566E+01 -  
.432E+00 0.415E-06 0.421E-06 0.121E-05  
-.115E+00 0.155E+03 -.338E+02 0.958E-01 -.160E+03 0.332E+02 0.192E-01 0.565E+01  
0.555E+00 -.340E-06 -.159E-06 0.765E-06  
0.228E+01 -.150E+03 -.386E+02 -.227E+01 0.156E+03 0.386E+02 -.104E-01 -.566E+01  
0.768E-01 0.380E-06 -.538E-06 0.734E-07  
-.412E+00 -.151E+03 0.388E+02 0.413E+00 0.157E+03 -.386E+02 -.129E-02 -.567E+01 -  
.269E+00 -.206E-06 -.736E-06 -.803E-07  
0.136E+02 -.146E+03 -.413E+02 -.138E+02 0.151E+03 0.413E+02 0.257E+00 -.567E+01 -  
.348E-01 -.120E-06 -.154E-06 0.320E-07  
0.162E+01 -.151E+03 0.402E+02 -.162E+01 0.156E+03 -.400E+02 -.100E-02 -.567E+01 -  
.229E+00 0.279E-06 -.538E-06 0.593E-06  
0.352E+01 -.149E+03 0.443E+02 -.352E+01 0.155E+03 -.441E+02 -.195E-02 -.567E+01 -  
.180E+00 0.431E-06 -.388E-06 0.303E-06  
-.148E+02 -.146E+03 -.329E+02 0.149E+02 0.151E+03 0.329E+02 -.957E-01 -.566E+01

0.505E-01 0.183E-06 -.128E-06 0.375E-06  
-.297E+01 -.149E+03 0.432E+02 0.296E+01 0.155E+03 -.430E+02 0.115E-01 -.567E+01 -  
.241E+00 -.179E-06 -.577E-06 -.103E-05  
-.379E+01 -.150E+03 -.385E+02 0.379E+01 0.156E+03 0.385E+02 -.631E-02 -.566E+01  
0.241E-01 -.120E-06 -.494E-06 0.390E-06  
-.207E+01 -.151E+03 0.395E+02 0.207E+01 0.156E+03 -.392E+02 0.153E-02 -.566E+01 -  
.282E+00 -.594E-06 -.681E-06 -.771E-06  
-.488E-02 -.148E+03 0.486E+02 0.126E-01 0.154E+03 -.484E+02 -.560E-02 -.569E+01 -  
.158E+00 0.315E-06 -.390E-06 -.734E-06  
0.196E+02 -.103E+03 0.222E+02 -.212E+02 0.103E+03 -.246E+02 0.154E+01 0.139E+00  
0.238E+01 -.523E-06 -.638E-06 0.124E-06  
-.192E+02 -.103E+03 0.153E+02 0.216E+02 0.103E+03 -.168E+02 -.241E+01 -.118E+00  
0.152E+01 0.702E-07 -.790E-06 -.162E-06  
0.715E-01 0.461E+03 0.202E+03 -.748E-01 -.462E+03 -.201E+03 0.382E-02 0.102E+01 -  
.219E+00 0.859E-06 0.348E-06 0.158E-05  
0.212E+00 0.353E+03 -.234E+03 -.212E+00 -.353E+03 0.234E+03 0.260E-02 0.442E+00 -  
.370E-01 -.477E-06 -.760E-06 -.254E-05  
-.244E-01 0.351E+03 0.240E+03 0.230E-01 -.351E+03 -.241E+03 0.314E-02 0.408E+00  
0.562E-01 0.147E-05 -.523E-07 0.212E-05  
-.173E+00 0.462E+03 -.195E+03 0.180E+00 -.463E+03 0.195E+03 -.666E-02 0.105E+01  
0.233E+00 -.163E-05 -.206E-05 -.156E-05  
-.622E-01 0.210E+03 -.272E+03 0.663E-01 -.210E+03 0.272E+03 -.450E-02 0.930E-01

0.561E-01 - .890E-07 0.720E-06 -.187E-05  
0.562E+00 0.461E+03 0.202E+03 -.564E+00 -.462E+03 -.201E+03 0.202E-02 0.102E+01 -  
.214E+00 -.714E-06 0.654E-06 0.751E-06  
0.106E+01 0.352E+03 -.234E+03 -.107E+01 -.353E+03 0.234E+03 0.160E-01 0.447E+00 -  
.424E-01 0.543E-06 -.485E-06 -.154E-05  
0.413E+00 0.351E+03 0.240E+03 -.415E+00 -.351E+03 -.240E+03 0.302E-02 0.407E+00  
0.490E-01 0.161E-06 -.194E-06 0.321E-06  
0.578E+00 0.462E+03 -.195E+03 -.583E+00 -.463E+03 0.195E+03 0.478E-02 0.105E+01  
0.235E+00 0.357E-07 -.863E-06 -.240E-05  
0.689E+00 0.210E+03 -.272E+03 -.695E+00 -.210E+03 0.272E+03 0.597E-02 0.906E-01  
0.615E-01 0.539E-06 0.622E-06 -.117E-05  
0.425E+00 0.461E+03 0.202E+03 -.428E+00 -.462E+03 -.202E+03 0.386E-02 0.102E+01 -  
.214E+00 -.156E-05 0.104E-05 0.228E-05  
0.939E+00 0.352E+03 -.233E+03 -.955E+00 -.352E+03 0.233E+03 0.151E-01 0.440E+00 -  
.377E-01 0.195E-05 -.133E-05 0.136E-05  
0.478E+00 0.351E+03 0.241E+03 -.480E+00 -.351E+03 -.241E+03 0.250E-02 0.406E+00  
0.511E-01 -.131E-05 0.186E-06 0.848E-06  
0.704E+00 0.462E+03 -.194E+03 -.715E+00 -.463E+03 0.194E+03 0.787E-02 0.106E+01  
0.242E+00 0.165E-05 -.132E-05 0.267E-06  
0.724E+00 0.210E+03 -.271E+03 -.733E+00 -.210E+03 0.271E+03 0.652E-02 0.903E-01  
0.593E-01 0.118E-05 -.602E-06 0.511E-06  
-.182E+00 0.461E+03 0.202E+03 0.178E+00 -.462E+03 -.202E+03 0.450E-02 0.102E+01 -

.218E+00    -.792E-06 0.123E-05 0.460E-05  
              -.294E+00 0.352E+03 -.233E+03    0.298E+00 -.352E+03 0.233E+03    -.202E-02 0.439E+00 -  
.299E-01    0.389E-06 -.251E-05 0.325E-05  
              0.398E-01 0.351E+03 0.241E+03    -.389E-01 -.351E+03 -.241E+03    0.225E-02 0.409E+00  
0.556E-01    -.135E-05 0.786E-06 0.300E-05  
              0.501E-01 0.462E+03 -.194E+03    -.562E-01 -.463E+03 0.194E+03    0.400E-02 0.106E+01  
0.232E+00    0.174E-05 -.221E-05 0.333E-05  
              -.478E-01 0.210E+03 -.271E+03    0.458E-01 -.210E+03 0.271E+03    -.220E-03 0.926E-01  
0.325E-01    0.136E-06 -.184E-05 0.145E-05  
              -.551E+00 0.461E+03 0.202E+03    0.549E+00 -.462E+03 -.202E+03    0.766E-03 0.102E+01 -  
.220E+00    0.601E-06 0.997E-06 0.543E-05  
              -.119E+01 0.352E+03 -.233E+03    0.120E+01 -.353E+03 0.233E+03    -.162E-01 0.446E+00 -  
.330E-01    -.908E-06 -.263E-05 0.240E-05  
              -.352E+00 0.351E+03 0.241E+03    0.349E+00 -.351E+03 -.241E+03    0.207E-02 0.413E+00  
0.622E-01    -.154E-06 0.913E-06 0.480E-05  
              -.412E+00 0.462E+03 -.194E+03    0.425E+00 -.463E+03 0.194E+03    -.115E-01 0.106E+01  
0.230E+00    -.184E-06 -.328E-05 0.413E-05  
              -.560E+00 0.210E+03 -.271E+03    0.565E+00 -.210E+03 0.271E+03    -.939E-02 0.907E-01  
0.525E-01    -.705E-06 -.165E-05 0.919E-06  
              -.474E+00 0.461E+03 0.202E+03    0.474E+00 -.462E+03 -.202E+03    0.305E-02 0.102E+01 -  
.221E+00    0.162E-05 0.463E-06 0.392E-05  
              -.805E+00 0.353E+03 -.234E+03    0.819E+00 -.353E+03 0.234E+03    -.150E-01 0.446E+00 -

.393E-01    -.152E-05 -.184E-05 -.393E-06  
          -.373E+00 0.351E+03 0.241E+03    0.368E+00 -.351E+03 -.241E+03    0.947E-03 0.410E+00  
0.625E-01    0.118E-05 0.493E-06 0.426E-05  
          -.594E+00 0.462E+03 -.194E+03    0.607E+00 -.463E+03 0.194E+03    -.170E-01 0.105E+01  
0.234E+00    -.158E-05 -.310E-05 0.178E-05  
          -.587E+00 0.210E+03 -.272E+03    0.598E+00 -.210E+03 0.272E+03    -.101E-01 0.985E-01  
0.566E-01    -.103E-05 -.536E-06 -.723E-06  
          -.801E-02 0.206E+03 0.279E+03    0.114E-01 -.206E+03 -.279E+03    -.360E-02 0.684E-01 -  
.413E-01    0.112E-05 -.297E-06 0.127E-05  
          0.669E+00 0.303E+02 0.296E+03    -.664E+00 -.302E+02 -.296E+03    -.466E-02 -.411E-01  
0.734E-02    0.204E-06 -.107E-05 0.952E-06  
          -.845E+00 0.144E+03 -.282E+03    0.847E+00 -.144E+03 0.282E+03    -.318E-02 0.136E+00  
0.287E-01    -.331E-06 0.496E-06 -.111E-05  
          0.534E+00 -.215E+02 -.285E+03    -.534E+00 0.214E+02 0.285E+03    -.792E-03 0.383E-01  
0.187E-01    0.103E-06 0.340E-06 0.544E-06  
          0.502E+00 -.294E+02 0.293E+03    -.499E+00 0.294E+02 -.293E+03    -.551E-02 0.253E-01 -  
.305E-01    -.160E-06 -.621E-06 0.994E-06  
          0.525E+00 0.139E+03 0.289E+03    -.525E+00 -.139E+03 -.289E+03    0.178E-02 0.103E+00 -  
.250E-01    0.611E-06 -.951E-06 0.489E-06  
          -.126E+01 0.364E+02 -.287E+03    0.126E+01 -.364E+02 0.287E+03    -.396E-04 -.812E-02  
0.139E-01    0.358E-06 0.552E-06 -.740E-09  
          0.167E+01 -.130E+03 -.271E+03    -.169E+01 0.130E+03 0.271E+03    0.105E-01 -.881E-01

0.373E-01 0.268E-06 -.454E-06 0.113E-05  
0.397E+00 0.207E+03 0.280E+03 -.395E+00 -.207E+03 -.280E+03 0.711E-03 0.693E-01 -  
.372E-01 0.239E-06 -.827E-06 -.352E-07  
0.918E+00 0.312E+02 0.296E+03 -.922E+00 -.311E+02 -.296E+03 0.225E-02 -.411E-01  
0.120E-01 0.155E-06 -.120E-05 0.687E-06  
0.133E+01 0.144E+03 -.282E+03 -.133E+01 -.144E+03 0.282E+03 0.495E-02 0.126E+00  
0.280E-01 0.133E-06 0.912E-06 -.118E-05  
0.341E+01 -.199E+02 -.285E+03 -.343E+01 0.199E+02 0.285E+03 0.134E-01 0.408E-01  
0.138E-01 -.151E-06 0.360E-06 0.217E-06  
0.139E+01 -.287E+02 0.294E+03 -.139E+01 0.287E+02 -.294E+03 -.348E-02 0.251E-01 -  
.309E-01 0.149E-06 -.139E-05 0.125E-05  
0.677E+00 0.139E+03 0.290E+03 -.677E+00 -.139E+03 -.290E+03 0.622E-03 0.103E+00 -  
.296E-01 -.228E-06 -.955E-06 0.523E-07  
0.160E+01 0.367E+02 -.287E+03 -.159E+01 -.367E+02 0.287E+03 -.128E-01 -.211E-01  
0.129E-01 -.109E-06 0.639E-06 0.530E-07  
0.611E+01 -.125E+03 -.271E+03 -.613E+01 0.125E+03 0.271E+03 0.216E-01 -.899E-01  
0.148E-01 -.117E-06 -.240E-06 0.482E-06  
0.366E+00 0.207E+03 0.280E+03 -.371E+00 -.207E+03 -.280E+03 0.106E-03 0.682E-01 -  
.366E-01 -.858E-06 -.284E-06 0.363E-06  
-.406E-01 0.319E+02 0.296E+03 0.320E-01 -.318E+02 -.296E+03 0.105E-01 -.364E-01  
0.137E-01 -.107E-06 -.141E-07 0.504E-06  
0.210E+01 0.144E+03 -.281E+03 -.211E+01 -.144E+03 0.281E+03 0.120E-01 0.120E+00

0.242E-01 0.660E-06 0.811E-07 -.335E-06  
0.303E+01 -.172E+02 -.283E+03 -.305E+01 0.171E+02 0.283E+03 0.239E-01 0.852E-01  
0.617E-01 0.134E-06 -.415E-06 -.275E-06  
0.105E+01 -.272E+02 0.294E+03 -.105E+01 0.272E+02 -.294E+03 0.286E-02 0.242E-01 -  
.378E-01 0.451E-06 -.695E-06 0.740E-06  
0.950E-01 0.140E+03 0.290E+03 -.966E-01 -.140E+03 -.290E+03 0.129E-02 0.107E+00 -  
.233E-01 -.821E-06 0.243E-07 0.901E-06  
0.276E+01 0.387E+02 -.286E+03 -.277E+01 -.387E+02 0.286E+03 0.723E-03 -.117E-01  
0.297E-01 0.434E-06 0.327E-06 -.139E-06  
0.595E+01 -.115E+03 -.267E+03 -.610E+01 0.115E+03 0.267E+03 0.151E+00 -.151E-02  
0.131E+00 0.112E-05 0.137E-05 -.308E-06  
-.243E+00 0.207E+03 0.280E+03 0.241E+00 -.207E+03 -.280E+03 0.437E-02 0.714E-01 -  
.388E-01 -.106E-05 0.661E-06 0.199E-05  
-.115E+01 0.314E+02 0.294E+03 0.114E+01 -.314E+02 -.294E+03 0.916E-02 -.313E-01  
0.523E-02 -.134E-06 0.120E-05 0.597E-06  
0.594E+00 0.144E+03 -.281E+03 -.611E+00 -.144E+03 0.281E+03 0.178E-01 0.125E+00  
0.437E-01 0.414E-06 -.109E-05 0.650E-06  
-.940E+00 -.159E+02 -.286E+03 0.932E+00 0.158E+02 0.285E+03 0.612E-02 0.887E-01  
0.806E-01 -.329E-06 0.195E-06 -.460E-06  
-.648E+00 -.265E+02 0.293E+03 0.644E+00 0.265E+02 -.293E+03 0.487E-02 0.233E-01 -  
.273E-01 0.283E-06 0.746E-06 0.647E-07  
-.535E+00 0.139E+03 0.289E+03 0.531E+00 -.139E+03 -.289E+03 0.653E-02 0.114E+00 -

.215E-01    -.539E-06 0.101E-05 0.209E-05  
0.776E+00 0.408E+02 -.287E+03    -.788E+00 -.408E+02 0.287E+03    0.513E-02 0.124E-02 -  
.190E-01    -.254E-06 -.344E-06 -.102E-06  
-.460E+00 -.113E+03 -.276E+03    0.426E+00 0.113E+03 0.276E+03    0.348E-01 0.575E-01 -  
.269E+00    -.368E-06 -.875E-06 -.709E-06  
-.572E+00 0.206E+03 0.279E+03    0.570E+00 -.206E+03 -.279E+03    0.115E-02 0.718E-01 -  
.457E-01    -.216E-06 0.118E-05 0.330E-05  
-.782E+00 0.304E+02 0.294E+03    0.785E+00 -.304E+02 -.294E+03    -.754E-02 -.310E-01 -  
.158E-02    -.192E-06 0.119E-05 0.802E-06  
-.123E+01 0.144E+03 -.281E+03    0.124E+01 -.145E+03 0.281E+03    -.157E-01 0.122E+00  
0.504E-01    -.196E-06 -.166E-05 0.773E-06  
-.365E+01 -.174E+02 -.283E+03    0.369E+01 0.173E+02 0.283E+03    -.303E-01 0.115E+00  
0.598E-01    -.103E-06 -.765E-06 -.168E-06  
-.130E+01 -.277E+02 0.291E+03    0.129E+01 0.277E+02 -.291E+03    -.133E-02 0.338E-01 -  
.221E-01    -.177E-06 0.135E-05 -.125E-06  
-.347E+00 0.139E+03 0.289E+03    0.346E+00 -.139E+03 -.289E+03    0.272E-04 0.111E+00 -  
.148E-01    0.136E-06 0.113E-05 0.251E-05  
-.828E+00 0.400E+02 -.287E+03    0.820E+00 -.400E+02 0.287E+03    0.126E-01 -.833E-02 -  
.182E-01    -.462E-07 -.648E-06 -.494E-07  
-.785E+01 -.119E+03 -.267E+03    0.804E+01 0.119E+03 0.267E+03    -.187E+00 0.172E-03  
0.352E-01    -.117E-05 0.142E-05 -.127E-06  
-.408E+00 0.206E+03 0.279E+03    0.409E+00 -.206E+03 -.279E+03    -.279E-02 0.713E-01 -

.466E-01 0.787E-06 0.754E-06 0.290E-05  
-.604E-01 0.300E+02 0.294E+03 0.701E-01 -.299E+02 -.294E+03 -.945E-02 -.349E-01  
0.103E-02 0.629E-07 0.566E-07 0.952E-06  
-.206E+01 0.145E+03 -.282E+03 0.208E+01 -.145E+03 0.282E+03 -.189E-01 0.131E+00  
0.258E-01 -.715E-06 -.963E-06 -.424E-07  
-.256E+01 -.208E+02 -.285E+03 0.259E+01 0.208E+02 0.285E+03 -.291E-01 0.405E-01  
0.320E-01 0.349E-06 0.225E-06 0.233E-06  
-.548E+00 -.290E+02 0.291E+03 0.553E+00 0.290E+02 -.291E+03 -.282E-02 0.291E-01 -  
.253E-01 -.524E-06 0.740E-06 0.286E-06  
0.604E-01 0.139E+03 0.289E+03 -.605E-01 -.139E+03 -.289E+03 -.337E-03 0.109E+00 -  
.210E-01 0.821E-06 0.119E-06 0.173E-05  
-.289E+01 0.378E+02 -.286E+03 0.291E+01 -.377E+02 0.286E+03 -.143E-01 -.460E-02  
0.213E-01 -.365E-06 -.258E-06 -.332E-07  
-.513E+01 -.128E+03 -.271E+03 0.518E+01 0.128E+03 0.271E+03 -.462E-01 -.865E-01  
0.382E-01 0.371E-06 -.469E-06 0.542E-06  
0.405E+00 -.137E+03 0.280E+03 -.397E+00 0.137E+03 -.280E+03 -.967E-02 -.128E+00 -  
.159E-01 -.776E-06 -.593E-06 0.942E-06  
0.194E+01 -.343E+03 0.233E+03 -.195E+01 0.344E+03 -.233E+03 0.910E-02 -.461E+00 -  
.550E-01 -.334E-06 -.977E-06 0.178E-05  
-.252E+01 -.197E+03 -.259E+03 0.253E+01 0.197E+03 0.259E+03 -.931E-02 -.198E+00  
0.371E-01 0.390E-06 -.947E-06 0.994E-06  
0.691E+01 -.447E+03 -.198E+03 -.693E+01 0.448E+03 0.198E+03 0.947E-02 -.112E+01

0.891E-01 0.923E-06 -.326E-06 0.585E-06  
-.451E+00 -.451E+03 0.204E+03 0.452E+00 0.452E+03 -.204E+03 -.206E-02 -.108E+01 -  
.113E+00 -.108E-05 -.209E-05 0.108E-06  
0.172E+01 -.203E+03 0.269E+03 -.171E+01 0.203E+03 -.269E+03 -.480E-02 -.928E-01 -  
.322E-01 -.486E-06 -.819E-06 0.182E-05  
-.210E+01 -.338E+03 -.222E+03 0.215E+01 0.338E+03 0.222E+03 -.441E-01 -.605E+00  
0.541E-01 0.809E-06 -.726E-06 0.759E-06  
0.218E+01 -.136E+03 0.282E+03 -.218E+01 0.136E+03 -.282E+03 -.634E-02 -.126E+00 -  
.965E-02 0.167E-06 -.996E-06 0.203E-05  
0.671E+01 -.339E+03 0.238E+03 -.670E+01 0.340E+03 -.238E+03 -.126E-01 -.462E+00 -  
.463E-01 0.106E-05 -.451E-06 0.222E-05  
0.678E+01 -.193E+03 -.258E+03 -.679E+01 0.193E+03 0.258E+03 0.108E-01 -.146E+00  
0.634E-01 -.535E-07 -.609E-06 0.969E-06  
0.313E+02 -.427E+03 -.198E+03 -.313E+02 0.428E+03 0.197E+03 0.717E-01 -.968E+00  
0.135E+00 -.578E-06 0.423E-06 0.265E-06  
0.544E+01 -.449E+03 0.209E+03 -.544E+01 0.450E+03 -.209E+03 0.654E-03 -.108E+01 -  
.801E-01 0.695E-06 -.139E-05 0.251E-05  
0.368E+01 -.201E+03 0.272E+03 -.368E+01 0.201E+03 -.272E+03 -.714E-03 -.977E-01 -  
.308E-01 0.923E-06 -.603E-06 0.195E-05  
0.124E+02 -.332E+03 -.223E+03 -.125E+02 0.332E+03 0.223E+03 0.120E+00 -.535E+00  
0.317E-01 -.232E-06 -.182E-06 0.611E-06  
0.218E+01 -.133E+03 0.283E+03 -.219E+01 0.133E+03 -.283E+03 0.540E-03 -.128E+00 -

.467E-02 0.108E-05 -.424E-06 0.100E-05  
0.491E+01 -.332E+03 0.245E+03 -.487E+01 0.332E+03 -.245E+03 -.320E-01 -.476E+00 -  
.378E-01 0.134E-05 -.314E-06 -.681E-06  
0.112E+02 -.182E+03 -.258E+03 -.113E+02 0.182E+03 0.258E+03 0.463E-01 -.993E-01 -  
.105E+00 0.503E-06 -.778E-07 0.167E-06  
0.316E+02 -.399E+03 -.175E+03 -.319E+02 0.401E+03 0.174E+03 0.285E+00 -.140E+01  
0.134E+01 0.118E-05 -.403E-05 0.104E-05  
0.929E+01 -.443E+03 0.219E+03 -.929E+01 0.444E+03 -.219E+03 -.548E-02 -.109E+01 -  
.482E-01 0.161E-05 -.571E-06 0.112E-05  
0.168E+01 -.196E+03 0.273E+03 -.169E+01 0.197E+03 -.273E+03 0.546E-02 -.109E+00 -  
.514E-01 0.141E-05 0.637E-07 -.182E-06  
0.172E+02 -.310E+03 -.216E+03 -.175E+02 0.310E+03 0.216E+03 0.322E+00 -.220E+00  
0.124E+00 0.660E-06 -.144E-05 0.549E-06  
-.104E+01 -.132E+03 0.281E+03 0.103E+01 0.132E+03 -.281E+03 0.102E-01 -.127E+00 -  
.155E-03 0.962E-06 0.677E-06 -.894E-06  
-.514E+01 -.332E+03 0.239E+03 0.513E+01 0.332E+03 -.239E+03 0.862E-02 -.494E+00 -  
.426E-01 0.897E-06 -.271E-06 -.347E-05  
0.156E+01 -.170E+03 -.261E+03 -.168E+01 0.169E+03 0.261E+03 0.114E+00 0.361E+00 -  
.103E+00 -.257E-05 0.165E-06 -.451E-06  
-.663E+01 -.303E+03 -.189E+03 0.619E+01 0.298E+03 0.185E+03 0.463E+00 0.503E+01  
0.438E+01 -.153E-06 -.117E-05 0.812E-06  
-.646E+00 -.436E+03 0.227E+03 0.644E+00 0.437E+03 -.227E+03 0.137E-02 -.120E+01 -

.484E-01 0.155E-05 -.568E-06 -.272E-05  
-.303E+01 -.197E+03 0.268E+03 0.302E+01 0.197E+03 -.268E+03 0.145E-01 -.112E+00 -  
.432E-01 0.601E-06 0.926E-06 -.221E-05  
0.320E+01 -.281E+03 -.215E+03 -.510E+01 0.280E+03 0.214E+03 0.190E+01 0.639E+00  
0.822E+00 -.581E-05 -.319E-05 0.478E-06  
-.274E+01 -.134E+03 0.277E+03 0.274E+01 0.134E+03 -.277E+03 0.246E-02 -.124E+00 -  
.188E-01 -.208E-06 0.127E-05 -.180E-05  
-.599E+01 -.338E+03 0.230E+03 0.599E+01 0.339E+03 -.230E+03 0.114E-01 -.495E+00 -  
.466E-01 -.134E-05 -.485E-06 -.358E-05  
-.648E+01 -.171E+03 -.257E+03 0.656E+01 0.170E+03 0.257E+03 -.736E-01 0.476E+00  
0.814E-02 0.206E-05 -.111E-06 -.251E-06  
-.441E+02 -.422E+03 -.184E+03 0.446E+02 0.423E+03 0.183E+03 -.556E+00 -.109E+01  
0.639E+00 -.125E-05 -.346E-05 0.142E-05  
-.867E+01 -.441E+03 0.211E+03 0.867E+01 0.443E+03 -.211E+03 0.143E-01 -.111E+01 -  
.763E-01 -.428E-06 -.815E-06 -.419E-05  
-.292E+01 -.201E+03 0.265E+03 0.293E+01 0.201E+03 -.265E+03 -.912E-02 -.110E+00 -  
.207E-01 -.926E-06 0.775E-06 -.233E-05  
-.144E+02 -.290E+03 -.209E+03 0.163E+02 0.289E+03 0.208E+03 -.197E+01 0.599E+00  
0.785E+00 0.507E-05 -.283E-05 0.898E-06  
-.138E+01 -.136E+03 0.277E+03 0.139E+01 0.136E+03 -.277E+03 -.101E-01 -.125E+00 -  
.242E-01 -.117E-05 0.611E-06 -.943E-06  
-.277E+01 -.343E+03 0.230E+03 0.275E+01 0.343E+03 -.230E+03 0.235E-01 -.473E+00 -

.596E-01    -.151E-05 -.113E-05 -.124E-05  
           -.104E+02 -.189E+03 -.258E+03    0.104E+02 0.189E+03 0.258E+03    -.762E-01 -.139E+00 -  
 .524E-01    -.472E-06 -.170E-06 0.370E-06  
           -.149E+02 -.446E+03 -.196E+03    0.150E+02 0.447E+03 0.196E+03    -.686E-01 -.112E+01 -  
 0.984E-01    -.189E-07 -.456E-06 0.961E-06  
           -.547E+01 -.448E+03 0.204E+03    0.547E+01 0.449E+03 -.203E+03    -.469E-02 -.108E+01 -  
 .125E+00    -.221E-05 -.167E-05 -.295E-05  
           -.902E+00 -.203E+03 0.267E+03    0.910E+00 0.203E+03 -.267E+03    -.906E-02 -.102E+00 -  
 .319E-01    -.150E-05 -.198E-06 -.386E-06  
           -.163E+02 -.329E+03 -.218E+03    0.166E+02 0.329E+03 0.218E+03    -.358E+00 -.481E+00  
 0.425E-01    -.603E-06 -.144E-05 0.113E-05  
           -.264E+01 -.250E+03 -.196E+03    0.156E+01 0.241E+03 0.190E+03    0.991E+00 0.787E+01  
 0.470E+01    0.538E-06 -.497E-05 0.172E-06  
           0.529E+02 -.518E+03 -.137E+03    -.540E+02 0.522E+03 0.140E+03    0.105E+01 -.395E+01 -  
 .382E+01    -.210E-05 -.276E-05 0.127E-05  
           -.469E+02 -.588E+03 -.446E+03    0.530E+02 0.641E+03 0.480E+03    -.597E+01 -.518E+02 -  
 .340E+02    0.283E-05 0.111E-04 0.119E-04  
 -----  
           0.447E+01 0.287E+02 0.219E+02    -.291E-12 -.136E-11 0.131E-11    -.452E+01 -.286E+02 -  
 .219E+02    0.152E-05 -.477E-04 0.865E-04

POSITION

TOTAL-FORCE (eV/Angst)

-----

|          |          |         |           |           |           |
|----------|----------|---------|-----------|-----------|-----------|
| 1.24575  | 4.02870  | 5.43979 | 0.000043  | 0.001001  | -0.000394 |
| 1.21024  | 4.07581  | 8.43726 | -0.000979 | 0.002563  | -0.001192 |
| 3.70862  | 4.02890  | 5.43965 | 0.000305  | 0.001873  | -0.001078 |
| 3.67998  | 4.07733  | 8.43690 | -0.004040 | -0.000469 | -0.002948 |
| 6.17157  | 4.02854  | 5.43942 | -0.000013 | -0.000156 | -0.001738 |
| 6.14482  | 4.08292  | 8.43295 | -0.002845 | -0.003353 | -0.003243 |
| 8.63513  | 4.02801  | 5.43869 | 0.000772  | -0.000462 | -0.001990 |
| 8.60339  | 4.08732  | 8.43089 | -0.000142 | -0.001224 | -0.002282 |
| 11.09928 | 4.02784  | 5.43885 | 0.000873  | 0.001951  | -0.002702 |
| 11.06021 | 4.08619  | 8.43099 | -0.001744 | 0.000655  | -0.000718 |
| 13.56311 | 4.02807  | 5.43972 | 0.000335  | 0.001602  | -0.001607 |
| 13.52141 | 4.08047  | 8.43349 | 0.000411  | -0.002304 | 0.000238  |
| 2.44241  | 15.48073 | 8.85224 | -0.000613 | -0.005188 | 0.002222  |
| 0.01714  | 15.44624 | 5.32469 | 0.000354  | 0.001554  | -0.001169 |
| 4.86040  | 15.47728 | 8.86623 | 0.000880  | 0.000275  | -0.000525 |
| 2.48016  | 15.44854 | 5.27562 | 0.000359  | -0.001189 | -0.000470 |
| 4.94382  | 15.44925 | 5.24869 | 0.001740  | -0.002928 | 0.000257  |
| 12.31531 | 15.48242 | 9.00211 | -0.004395 | 0.002061  | 0.005004  |
| 9.86772  | 15.44556 | 5.34176 | 0.000428  | -0.001184 | 0.001055  |
| 14.76279 | 15.48245 | 8.89951 | -0.006009 | -0.000306 | 0.005357  |

|          |          |         |           |           |           |
|----------|----------|---------|-----------|-----------|-----------|
| 12.33384 | 15.44510 | 5.36128 | 0.001352  | -0.003220 | -0.001231 |
| 7.40743  | 15.44616 | 5.26463 | 0.002417  | 0.001641  | 0.001400  |
| 6.44846  | 16.34427 | 7.40648 | -0.001820 | 0.000574  | 0.004822  |
| 8.60064  | 16.47644 | 7.89249 | 0.005752  | 0.001144  | 0.006071  |
| 1.24544  | 5.11881  | 5.35500 | 0.000956  | 0.000269  | -0.002504 |
| 2.44348  | 5.83889  | 8.62292 | 0.002417  | -0.004460 | 0.001211  |
| 0.01380  | 5.79530  | 5.28573 | 0.002065  | -0.002533 | 0.000469  |
| 1.21063  | 5.16420  | 8.54151 | 0.000256  | -0.000503 | -0.001847 |
| 2.44351  | 7.27931  | 8.74832 | -0.000075 | -0.001216 | -0.000124 |
| 3.70866  | 5.11896  | 5.35390 | -0.000431 | -0.001523 | 0.000288  |
| 4.90800  | 5.84315  | 8.62123 | -0.001089 | 0.003824  | -0.000793 |
| 2.47701  | 5.79561  | 5.28397 | 0.001445  | -0.000673 | -0.002609 |
| 3.67679  | 5.16572  | 8.54000 | -0.000125 | 0.001644  | 0.000002  |
| 4.90764  | 7.28398  | 8.74777 | 0.000735  | -0.000608 | 0.001059  |
| 6.17184  | 5.11860  | 5.35433 | 0.001473  | 0.000505  | 0.000839  |
| 7.37096  | 5.84929  | 8.62094 | -0.000643 | 0.007038  | -0.002465 |
| 4.94029  | 5.79548  | 5.28340 | 0.000604  | -0.002762 | -0.001177 |
| 6.14080  | 5.17108  | 8.53715 | -0.002512 | 0.002569  | 0.002524  |
| 7.37071  | 7.28983  | 8.75132 | -0.001996 | 0.001627  | 0.000129  |
| 8.63543  | 5.11820  | 5.35521 | 0.001247  | 0.001479  | -0.001128 |
| 9.83233  | 5.85166  | 8.62337 | 0.002775  | 0.000471  | -0.001081 |
| 7.40374  | 5.79498  | 5.28512 | 0.003445  | -0.002767 | -0.001341 |

|          |          |         |           |           |           |
|----------|----------|---------|-----------|-----------|-----------|
| 8.60194  | 5.17528  | 8.53759 | -0.001845 | -0.000378 | -0.000147 |
| 9.83204  | 7.29110  | 8.75719 | -0.001865 | -0.002426 | -0.002413 |
| 11.09930 | 5.11814  | 5.35578 | -0.000873 | -0.003214 | -0.001423 |
| 12.29449 | 5.84673  | 8.62385 | 0.000074  | 0.005700  | -0.002211 |
| 9.86750  | 5.79468  | 5.28678 | -0.000754 | -0.000801 | 0.001545  |
| 11.06261 | 5.17409  | 8.53894 | 0.002597  | 0.002772  | -0.000328 |
| 12.29428 | 7.28729  | 8.75533 | -0.004521 | 0.001225  | -0.001526 |
| 13.56278 | 5.11829  | 5.35605 | 0.002662  | 0.000656  | -0.002043 |
| 14.75895 | 5.83988  | 8.62434 | -0.000208 | -0.002693 | -0.002232 |
| 12.33118 | 5.79480  | 5.28692 | -0.004504 | -0.001550 | 0.002589  |
| 13.52535 | 5.16844  | 8.54022 | -0.003533 | 0.003851  | -0.001363 |
| 14.75917 | 7.28012  | 8.75179 | 0.000897  | 0.002541  | -0.000679 |
| 0.01434  | 7.23830  | 5.19017 | 0.000080  | -0.000200 | 0.000067  |
| 1.24689  | 9.38061  | 5.13160 | 0.000537  | -0.001848 | -0.000013 |
| 1.21085  | 7.98059  | 8.79588 | -0.000922 | -0.000538 | 0.001524  |
| 2.44214  | 10.12243 | 8.87141 | -0.000901 | 0.002787  | -0.005027 |
| 0.01532  | 10.08686 | 5.14049 | -0.002041 | -0.000136 | -0.002403 |
| 1.24606  | 7.94244  | 5.15775 | 0.002014  | -0.002604 | 0.000827  |
| 1.21082  | 9.41592  | 8.85782 | -0.000673 | 0.004570  | 0.000172  |
| 2.44072  | 11.55513 | 8.88414 | -0.006177 | -0.002286 | 0.001625  |
| 2.47747  | 7.23842  | 5.18585 | 0.002796  | 0.002893  | 0.001299  |
| 3.70997  | 9.38055  | 5.12566 | -0.001074 | -0.002997 | 0.000032  |

|         |          |         |           |           |           |
|---------|----------|---------|-----------|-----------|-----------|
| 3.67534 | 7.98360  | 8.79349 | -0.000561 | 0.000967  | 0.000929  |
| 4.90487 | 10.12925 | 8.87518 | 0.000387  | -0.000624 | -0.000065 |
| 2.47867 | 10.08713 | 5.12695 | -0.002273 | 0.001510  | 0.000760  |
| 3.70939 | 7.94242  | 5.15441 | 0.000805  | -0.004012 | -0.001702 |
| 3.67589 | 9.41970  | 8.85445 | -0.001589 | 0.002103  | -0.000145 |
| 4.90263 | 11.56506 | 8.89086 | 0.000056  | 0.002014  | 0.000940  |
| 4.94085 | 7.23830  | 5.18552 | -0.004694 | 0.002261  | 0.000820  |
| 6.17318 | 9.38002  | 5.13173 | 0.002052  | 0.002120  | 0.001818  |
| 6.13864 | 7.99044  | 8.79647 | 0.002385  | -0.000464 | -0.001602 |
| 7.36780 | 10.13760 | 8.89473 | -0.001069 | 0.002937  | 0.000738  |
| 4.94196 | 10.08682 | 5.12700 | 0.004126  | 0.001474  | -0.001158 |
| 6.17284 | 7.94199  | 5.15766 | -0.000064 | 0.000548  | 0.003027  |
| 6.13939 | 9.42660  | 8.86164 | 0.000669  | -0.000427 | -0.002058 |
| 7.36410 | 11.57721 | 8.92935 | 0.001047  | -0.002729 | 0.001747  |
| 7.40426 | 7.23794  | 5.19012 | 0.002144  | 0.001769  | 0.001062  |
| 8.63700 | 9.37970  | 5.14543 | -0.000513 | 0.002960  | 0.000934  |
| 8.60086 | 7.99568  | 8.80617 | 0.001183  | -0.000718 | -0.001232 |
| 9.83068 | 10.14286 | 8.92842 | -0.002294 | 0.001878  | 0.000059  |
| 7.40553 | 10.08627 | 5.14064 | 0.001175  | -0.003586 | 0.003144  |
| 8.63637 | 7.94166  | 5.16555 | 0.002616  | 0.001785  | -0.001413 |
| 8.60077 | 9.43254  | 8.88532 | -0.006009 | 0.002577  | -0.001321 |
| 9.82927 | 11.58244 | 9.00096 | 0.001087  | 0.004991  | 0.002086  |

|          |          |         |           |           |           |
|----------|----------|---------|-----------|-----------|-----------|
| 9.86805  | 7.23787  | 5.19489 | -0.000367 | 0.000106  | -0.000236 |
| 11.10106 | 9.37979  | 5.15156 | -0.003850 | -0.001020 | 0.000645  |
| 11.06331 | 7.99411  | 8.80818 | -0.000324 | -0.001826 | -0.000038 |
| 12.29815 | 10.12943 | 8.90340 | -0.000250 | -0.001262 | 0.001554  |
| 9.86930  | 10.08593 | 5.15631 | -0.005461 | -0.001471 | 0.001401  |
| 11.10021 | 7.94175  | 5.16862 | -0.000620 | -0.003077 | 0.001387  |
| 11.06206 | 9.43062  | 8.88839 | 0.004534  | 0.002035  | 0.002002  |
| 12.30255 | 11.56557 | 8.94694 | 0.001369  | -0.001364 | -0.002597 |
| 12.33169 | 7.23799  | 5.19447 | -0.001026 | 0.000243  | -0.001765 |
| 13.56437 | 9.38021  | 5.14435 | 0.000699  | 0.001665  | -0.000591 |
| 13.52754 | 7.98555  | 8.80171 | -0.000699 | -0.002702 | -0.003072 |
| 14.76233 | 10.12320 | 8.88285 | -0.005325 | 0.000473  | -0.001684 |
| 12.33257 | 10.08637 | 5.15511 | 0.002657  | 0.000524  | -0.001546 |
| 13.56350 | 7.94214  | 5.16485 | -0.000087 | -0.000897 | -0.000376 |
| 13.52731 | 9.42040  | 8.86925 | -0.000071 | 0.003115  | -0.000379 |
| 14.76430 | 11.55727 | 8.90646 | -0.002821 | -0.000143 | 0.001917  |
| 0.01611  | 11.52516 | 5.16621 | -0.001083 | -0.002534 | 0.000382  |
| 1.24770  | 13.67535 | 5.22209 | 0.001889  | -0.002061 | -0.002480 |
| 1.21217  | 12.26335 | 8.89409 | 0.001045  | -0.000167 | 0.001134  |
| 2.43998  | 14.38728 | 8.86748 | -0.002756 | -0.000168 | 0.000740  |
| 0.01699  | 14.35408 | 5.27295 | -0.000503 | -0.000973 | -0.001964 |
| 1.24794  | 12.22963 | 5.17275 | 0.001041  | 0.000868  | -0.001360 |

|         |          |         |           |           |           |
|---------|----------|---------|-----------|-----------|-----------|
| 1.21434 | 13.70818 | 8.88771 | 0.001835  | 0.003331  | 0.003608  |
| 2.47958 | 11.52580 | 5.14547 | -0.001621 | -0.000166 | -0.001499 |
| 3.71218 | 13.67636 | 5.19535 | 0.004490  | 0.000872  | 0.001097  |
| 3.66932 | 12.26248 | 8.88184 | -0.002462 | 0.000198  | -0.000632 |
| 4.89370 | 14.38589 | 8.86075 | 0.002844  | -0.002819 | -0.002342 |
| 2.48000 | 14.35596 | 5.23149 | 0.001303  | -0.001494 | 0.001670  |
| 3.71150 | 12.23022 | 5.15602 | 0.000906  | -0.004508 | 0.001007  |
| 3.66212 | 13.70366 | 8.87117 | -0.004911 | 0.005108  | -0.000836 |
| 4.94290 | 11.52542 | 5.14351 | -0.000060 | -0.001729 | -0.001611 |
| 6.17627 | 13.67505 | 5.20032 | 0.000854  | 0.000921  | 0.000076  |
| 6.13145 | 12.27911 | 8.90591 | 0.004552  | 0.006298  | 0.004556  |
| 7.36614 | 14.42967 | 8.88203 | -0.005710 | -0.003521 | -0.001001 |
| 4.94347 | 14.35627 | 5.21375 | 0.000202  | -0.002203 | 0.001170  |
| 6.17493 | 12.22917 | 5.16623 | -0.001395 | -0.001061 | 0.001538  |
| 6.11879 | 13.72336 | 8.87765 | 0.006058  | 0.004276  | 0.001624  |
| 7.40625 | 11.52413 | 5.16368 | 0.000920  | -0.003293 | 0.000345  |
| 8.63876 | 13.67323 | 5.24377 | 0.001981  | 0.002410  | -0.001341 |
| 8.58939 | 12.29067 | 9.00208 | -0.003975 | -0.002660 | -0.005366 |
| 9.83855 | 14.39048 | 9.30305 | 0.020474  | 0.257825  | 0.204219  |
| 7.40672 | 14.35386 | 5.23530 | -0.001100 | -0.000842 | -0.000698 |
| 8.63820 | 12.22778 | 5.19800 | 0.000321  | -0.001185 | 0.001033  |
| 8.55571 | 13.73596 | 9.04598 | 0.019001  | 0.011946  | 0.021505  |

|          |          |          |           |           |           |
|----------|----------|----------|-----------|-----------|-----------|
| 9.86985  | 11.52338 | 5.18893  | 0.001756  | -0.001908 | -0.000130 |
| 11.10099 | 13.67352 | 5.27669  | 0.003072  | -0.000604 | -0.001010 |
| 11.07378 | 12.27333 | 9.00891  | 0.000404  | 0.000555  | -0.007050 |
| 12.30694 | 14.38896 | 9.00333  | 0.003262  | -0.002306 | 0.001089  |
| 9.86934  | 14.35300 | 5.29564  | 0.002944  | -0.000292 | -0.000257 |
| 11.10161 | 12.22804 | 5.21650  | -0.001144 | -0.002669 | 0.001047  |
| 11.11464 | 13.70636 | 9.07877  | -0.020657 | 0.020173  | 0.015780  |
| 12.33326 | 11.52411 | 5.18815  | -0.000927 | 0.000321  | 0.000531  |
| 13.56430 | 13.67399 | 5.25995  | 0.001600  | 0.000256  | 0.000075  |
| 13.53626 | 12.26601 | 8.93587  | -0.001453 | 0.003927  | 0.001864  |
| 14.76266 | 14.38906 | 8.90426  | -0.002496 | -0.000179 | 0.003825  |
| 12.33397 | 14.35288 | 5.30710  | 0.002720  | -0.002241 | -0.001794 |
| 13.56505 | 12.22870 | 5.20105  | 0.000064  | 0.000102  | -0.001133 |
| 13.54921 | 13.70690 | 8.94399  | -0.001717 | -0.000711 | 0.001312  |
| 9.91126  | 15.53185 | 10.00972 | -0.084476 | -0.898780 | -0.675561 |
| 7.28864  | 16.40884 | 8.69813  | 0.003063  | -0.008712 | -0.006429 |
| 10.02526 | 16.50365 | 10.64498 | 0.075087  | 0.614044  | 0.456807  |

---

total drift:

-0.044099

0.024206

-0.021585

---

FREE ENERGIE OF THE ION-ELECTRON SYSTEM (eV)

-----

free energy TOTEN = -1209.38425260 eV

energy without entropy= -1209.38425260 energy(sigma->0) = -1209.38425260

d Force = 0.5817810E-02[-0.236E-01, 0.353E-01] d Energy = 0.6060279E-02-0.242E-03

d Force = 0.6614734E+01[ 0.647E+01, 0.676E+01] d Ewald = 0.6615189E+01-0.455E-03

-----

POTLOK: cpu time 0.1786: real time 0.1808

-----

stress matrix after NEB project (eV)

-17.74740      -0.18399      0.08707

-0.18399      -15.02793      0.63651

0.08707      0.63651      -18.93295

FORCES: max atom, RMS      1.127530      0.112567

FORCE total and by dimension      1.364802      0.898780

Stress total and by dimension      30.002648      18.932955

Finite differences progress:

Degree of freedom:    3/ 6

Displacement:            1/ 2

Total:                    5/ 12

LATTYP: Found a simple orthorhombic cell.

ALAT            =      14.7806000000

B/A-ratio    =      1.2466138046

C/A-ratio    =      1.4433717170

Lattice vectors:

A1 = ( -14.7806000000,    0.0000000000,    0.0000000000)

A2 = (    0.0000000000,    0.0000000000, -18.4257000000)

A3 = (    0.0000000000, -21.3339000000,    0.0000000000)

Analysis of symmetry for initial positions (statically):

---

Subroutine PRICEL returns:

Original cell was already a primitive cell.

Routine SETGRP: Setting up the symmetry group for a  
simple orthorhombic supercell.

Subroutine GETGRP returns: Found 1 space group operations  
(whereof 1 operations were pure point group operations)  
out of a pool of 8 trial point group operations.

The static configuration has the point symmetry  $C_1$ .

Analysis of symmetry for dynamics (positions and initial velocities):

---

Subroutine PRICEL returns:

Original cell was already a primitive cell.

Routine SETGRP: Setting up the symmetry group for a  
simple orthorhombic supercell.

Subroutine GETGRP returns: Found 1 space group operations  
(whereof 1 operations were pure point group operations)  
out of a pool of 8 trial point group operations.

The dynamic configuration has the point symmetry  $C_1$ .

Analysis of constrained symmetry for selective dynamics:

=====

Subroutine PRICEL returns:

Original cell was already a primitive cell.

Routine SETGRP: Setting up the symmetry group for a

simple orthorhombic supercell.

Subroutine GETGRP returns: Found 1 space group operations

(whereof 1 operations were pure point group operations)

out of a pool of 8 trial point group operations.

The constrained configuration has the point symmetry C<sub>1</sub>.

Analysis of structural, dynamic, and magnetic symmetry:

=====

Subroutine PRICEL returns:

Original cell was already a primitive cell.

Routine SETGRP: Setting up the symmetry group for a

simple orthorhombic supercell.

Subroutine GETGRP returns: Found 1 space group operations

(whereof 1 operations were pure point group operations)

out of a pool of 8 trial point group operations.

The magnetic configuration has the point symmetry  $C_1$ .

Subroutine INISYM returns: Found 1 space group operations

(whereof 1 operations are pure point group operations),

and found 1 'primitive' translations

KPOINTS: KPT-Resolved Value to Generate K-Mesh: 0

Automatic generation of k-mesh.

Space group operators:

| irotn | det(A)   | alpha    | n_x      | n_y      | n_z      | tau_x    | tau_y    | tau_z    |
|-------|----------|----------|----------|----------|----------|----------|----------|----------|
| 1     | 1.000000 | 0.000000 | 1.000000 | 0.000000 | 0.000000 | 0.000000 | 0.000000 | 0.000000 |

Subroutine IBZKPT returns following result:

=====

Found 1 irreducible k-points:

Following reciprocal coordinates:

| Coordinates |          |          | Weight   |
|-------------|----------|----------|----------|
| 0.000000    | 0.000000 | 0.000000 | 1.000000 |

Following cartesian coordinates:

| Coordinates |          |          | Weight   |
|-------------|----------|----------|----------|
| 0.000000    | 0.000000 | 0.000000 | 1.000000 |

WAVPRE: cpu time 0.1214: real time 0.1308

FEWALD: cpu time 0.0028: real time 0.0028

ORTHCH: cpu time 0.9999: real time 1.0032

LOOP+: cpu time 189.6233: real time 190.6544

----- Iteration 7( 1) -----

POTLOK: cpu time 0.1726: real time 0.1852

|           |          |          |           |         |
|-----------|----------|----------|-----------|---------|
| SETDIJ:   | cpu time | 0.0101:  | real time | 0.0101  |
| EDDIAG:   | cpu time | 1.9317:  | real time | 1.9383  |
| RMM-DIIS: | cpu time | 7.2476:  | real time | 7.2728  |
| ORTHCH:   | cpu time | 0.3568:  | real time | 0.3579  |
| DOS:      | cpu time | 0.0004:  | real time | 0.0004  |
| CHARGE:   | cpu time | 0.5175:  | real time | 0.5292  |
| MIXING:   | cpu time | 0.0046:  | real time | 0.0046  |
| -----     |          |          |           |         |
| LOOP:     | cpu time | 10.2412: | real time | 10.2985 |

eigenvalue-minimisations : 1948

total energy-change (2. order) :-0.2139138E-02 (-0.2038520E+00)

number of electron 518.9999725 magnetization 0.9999998

augmentation part 11.7339532 magnetization 0.0542403

Broyden mixing:

rms(total) = 0.40495E-01 rms(broyden)= 0.40366E-01

rms(prec ) = 0.41848E-01

weight for this iteration 100.00

Free energy of the ion-electron system (eV)

-----

alpha Z PSCENC = 233.50077011

Ewald energy TEWEN = 91332.05595134

-Hartree energy DENC = -107340.52622411

-exchange EXHF = 0.00000000

-V(xc)+E(xc) XCENC = 1743.79944644

PAW double counting = 52181.73954105 -52244.66421629

entropy T\*S EENTRO = -0.00000000

eigenvalues EBANDS = -5813.00369845

atomic energy EATOM = 18704.32991668

Solvation Ediel\_sol = 0.00000000

-----

free energy TOTEN = -1202.76851323 eV

energy without entropy = -1202.76851323 energy(sigma->0) = -1202.76851323

-----

----- Iteration 7( 2) -----

|           |          |          |           |         |
|-----------|----------|----------|-----------|---------|
| POTLOK:   | cpu time | 0.1661:  | real time | 0.1796  |
| SETDIJ:   | cpu time | 0.0100:  | real time | 0.0101  |
| EDDIAG:   | cpu time | 1.9382:  | real time | 1.9447  |
| RMM-DIIS: | cpu time | 7.1090:  | real time | 7.1447  |
| ORTHCH:   | cpu time | 0.3519:  | real time | 0.3532  |
| DOS:      | cpu time | 0.0004:  | real time | 0.0004  |
| CHARGE:   | cpu time | 0.5264:  | real time | 0.5280  |
| MIXING:   | cpu time | 0.0048:  | real time | 0.0048  |
| -----     |          |          |           |         |
| LOOP:     | cpu time | 10.1069: | real time | 10.1655 |

eigenvalue-minimisations : 1920

total energy-change (2. order) : 0.1368912E-02 (-0.1874428E-02)

number of electron      518.9999725 magnetization      0.9999998

augmentation part      11.7344455 magnetization      0.0542445

Broyden mixing:

rms(total) = 0.25760E-01      rms(broyden)= 0.25743E-01

rms(prec ) = 0.26900E-01

weight for this iteration      100.00

eigenvalues of (default mixing \* dielectric matrix)

average eigenvalue GAMMA= 1.9902

1.9902

Free energy of the ion-electron system (eV)

-----  
alpha Z PSCENC = 233.50077011

Ewald energy TEWEN = 91332.05595134

-Hartree energy DENC = -107339.78809066

-exchange EXHF = 0.00000000

-V(xc)+E(xc) XCENC = 1743.78746041

PAW double counting = 52176.74780927 -52239.66661101

entropy T\*S EENTRO = -0.00000000

eigenvalues EBANDS = -5813.73435046

atomic energy EATOM = 18704.32991668

Solvation Ediel\_sol = 0.00000000

-----  
free energy TOTEN = -1202.76714432 eV

energy without entropy = -1202.76714432 energy(sigma->0) = -1202.76714432

-----

----- Iteration 7( 3) -----

|           |          |         |           |        |
|-----------|----------|---------|-----------|--------|
| POTLOK:   | cpu time | 0.1655: | real time | 0.1843 |
| SETDIJ:   | cpu time | 0.0101: | real time | 0.0101 |
| EDDIAG:   | cpu time | 1.9329: | real time | 1.9391 |
| RMM-DIIS: | cpu time | 7.2696: | real time | 7.2984 |
| ORTHCH:   | cpu time | 0.3549: | real time | 0.3558 |
| DOS:      | cpu time | 0.0003: | real time | 0.0003 |
| CHARGE:   | cpu time | 0.5250: | real time | 0.5265 |
| MIXING:   | cpu time | 0.0056: | real time | 0.0055 |

-----

|       |          |          |           |         |
|-------|----------|----------|-----------|---------|
| LOOP: | cpu time | 10.2638: | real time | 10.3199 |
|-------|----------|----------|-----------|---------|

eigenvalue-minimisations : 1949

total energy-change (2. order) : 0.9021644E-03 (-0.2786433E-03)

number of electron      518.9999725 magnetization      0.9999998  
augmentation part      11.7351164 magnetization      0.0542732

Broyden mixing:

rms(total) = 0.83391E-02      rms(broyden)= 0.83307E-02

rms(prec ) = 0.90217E-02

weight for this iteration      100.00

eigenvalues of (default mixing \* dielectric matrix)

average eigenvalue GAMMA=      1.5221

0.7604    2.2837

Free energy of the ion-electron system (eV)

-----

alpha Z      PSCENC =      233.50077011

Ewald energy    TEWEN =      91332.05595134

-Hartree energ DENC =    -107338.79029686

-exchange      EXHF =      0.00000000

-V(xc)+E(xc)    XCENC =      1743.78036774

PAW double counting =      52171.13401330    -52234.04781665

entropy T\*S      EENTRO =      -0.00000000

eigenvalues      EBANDS =      -5814.72914782

atomic energy EATOM = 18704.32991668

Solvation Ediel\_sol = 0.00000000

-----  
free energy TOTEN = -1202.76624216 eV

energy without entropy = -1202.76624216 energy(sigma->0) = -1202.76624216

----- Iteration 7( 4) -----

POTLOK: cpu time 0.1708: real time 0.1738

SETDIJ: cpu time 0.0101: real time 0.0101

EDDIAG: cpu time 1.9304: real time 1.9372

RMM-DIIS: cpu time 7.3215: real time 7.3421

ORTHCH: cpu time 0.3527: real time 0.3535

DOS: cpu time 0.0004: real time 0.0004

CHARGE: cpu time 0.5257: real time 0.5274

MIXING: cpu time 0.0056: real time 0.0056

-----

LOOP: cpu time 10.3173: real time 10.3502

eigenvalue-minimisations : 1949

total energy-change (2. order) : 0.1321276E-03 (-0.1846522E-04)

number of electron 518.9999725 magnetization 0.9999998

augmentation part 11.7347305 magnetization 0.0542739

Broyden mixing:

rms(total) = 0.38115E-02 rms(broyden)= 0.38103E-02

rms(prec ) = 0.41544E-02

weight for this iteration 100.00

eigenvalues of (default mixing \* dielectric matrix)

average eigenvalue GAMMA= 1.4649

2.3144 1.1925 0.8877

Free energy of the ion-electron system (eV)

-----

alpha Z PSCENC = 233.50077011

Ewald energy TEWEN = 91332.05595134

-Hartree energy DENC = -107338.56373363

-exchange EXHF = 0.00000000

-V(xc)+E(xc) XCENC = 1743.78134183

PAW double counting = 52170.57072364 -52233.48439087

entropy T\*S EENTRO = -0.00000000

eigenvalues EBANDS = -5814.95668913

atomic energy EATOM = 18704.32991668

Solvation Ediel\_sol = 0.00000000

-----  
free energy TOTEN = -1202.76611003 eV

energy without entropy = -1202.76611003 energy(sigma->0) = -1202.76611003

----- Iteration 7( 5) -----

|           |          |          |           |         |
|-----------|----------|----------|-----------|---------|
| POTLOK:   | cpu time | 0.1728:  | real time | 0.1872  |
| SETDIJ:   | cpu time | 0.0133:  | real time | 0.0134  |
| EDDIAG:   | cpu time | 1.9337:  | real time | 1.9403  |
| RMM-DIIS: | cpu time | 7.2719:  | real time | 7.3226  |
| ORTHCH:   | cpu time | 0.3549:  | real time | 0.3559  |
| DOS:      | cpu time | 0.0004:  | real time | 0.0004  |
| CHARGE:   | cpu time | 0.5252:  | real time | 0.5268  |
| MIXING:   | cpu time | 0.0056:  | real time | 0.0056  |
| -----     |          |          |           |         |
| LOOP:     | cpu time | 10.2777: | real time | 10.3523 |

eigenvalue-minimisations : 1951

total energy-change (2. order) :-0.2237332E-04 (-0.7551890E-05)

number of electron      518.9999725 magnetization      0.9999998

augmentation part      11.7346652 magnetization      0.0542737

Broyden mixing:

rms(total) = 0.15731E-02      rms(broyden)= 0.15712E-02

rms(prec ) = 0.18362E-02

weight for this iteration      100.00

eigenvalues of (default mixing \* dielectric matrix)

average eigenvalue GAMMA= 1.4469

2.3670 1.7359 0.8424 0.8424

Free energy of the ion-electron system (eV)

-----

alpha Z PSCENC = 233.50077011

Ewald energy TEWEN = 91332.05595134

-Hartree energy DENC = -107338.42916170

-exchange EXHF = 0.00000000

-V(xc)+E(xc) XCENC = 1743.78047359

PAW double counting = 52171.09310576 -52234.00673723

entropy T\*S EENTRO = -0.00000000

eigenvalues EBANDS = -5815.09045096

atomic energy EATOM = 18704.32991668

Solvation Ediel\_sol = 0.00000000

-----

free energy TOTEN = -1202.76613240 eV

energy without entropy = -1202.76613240 energy(sigma->0) = -1202.76613240

-----

----- Iteration 7( 6) -----

|           |          |         |           |        |
|-----------|----------|---------|-----------|--------|
| POTLOK:   | cpu time | 0.1649: | real time | 0.1827 |
| SETDIJ:   | cpu time | 0.0100: | real time | 0.0100 |
| EDDIAG:   | cpu time | 1.9293: | real time | 1.9355 |
| RMM-DIIS: | cpu time | 7.1529: | real time | 7.1737 |
| ORTHCH:   | cpu time | 0.3525: | real time | 0.3535 |
| DOS:      | cpu time | 0.0004: | real time | 0.0004 |
| CHARGE:   | cpu time | 0.5257: | real time | 0.5273 |
| MIXING:   | cpu time | 0.0061: | real time | 0.0061 |

-----

|       |          |          |           |         |
|-------|----------|----------|-----------|---------|
| LOOP: | cpu time | 10.1418: | real time | 10.1893 |
|-------|----------|----------|-----------|---------|

eigenvalue-minimisations : 1915

total energy-change (2. order) :-0.4228455E-04 (-0.9407870E-06)

number of electron 518.9999725 magnetization 0.9999998

augmentation part            11.7346301 magnetization            0.0542731

Broyden mixing:

rms(total) = 0.76035E-03      rms(broyden)= 0.76006E-03

rms(prec ) = 0.10203E-02

weight for this iteration      100.00

eigenvalues of (default mixing \* dielectric matrix)

average eigenvalue GAMMA=    1.4155

2.5187  2.0101  0.9546  0.9546  0.6397

Free energy of the ion-electron system (eV)

-----

alpha Z            PSCENC =            233.50077011

Ewald energy      TEWEN =            91332.05595134

-Hartree energ DENC =    -107338.27697556

-exchange          EXHF =            0.00000000

-V(xc)+E(xc)      XCENC =            1743.77984274

PAW double counting =    52171.59859384    -52234.51217744

entropy T\*S        EENTRO =            -0.00000000

eigenvalues        EBANDS =            -5815.24209639

atomic energy      EATOM =            18704.32991668

Solvation Ediel\_sol = 0.00000000

-----

free energy TOTEN = -1202.76617469 eV

energy without entropy = -1202.76617469 energy(sigma->0) = -1202.76617469

-----

----- Iteration 7( 7) -----

|           |          |         |           |        |
|-----------|----------|---------|-----------|--------|
| POTLOK:   | cpu time | 0.1657: | real time | 0.1702 |
| SETDIJ:   | cpu time | 0.0101: | real time | 0.0101 |
| EDDIAG:   | cpu time | 1.9290: | real time | 1.9355 |
| RMM-DIIS: | cpu time | 6.5726: | real time | 6.5913 |
| ORTHCH:   | cpu time | 0.3515: | real time | 0.3524 |
| DOS:      | cpu time | 0.0004: | real time | 0.0004 |
| CHARGE:   | cpu time | 0.5271: | real time | 0.5288 |

MIXING: cpu time 0.0057: real time 0.0057

-----

LOOP: cpu time 9.5621: real time 9.5944

eigenvalue-minimisations : 1771

total energy-change (2. order) :-0.3451252E-04 (-0.2852795E-06)

number of electron 518.9999725 magnetization 0.9999998

augmentation part 11.7346490 magnetization 0.0542736

Broyden mixing:

rms(total) = 0.39002E-03 rms(broyden)= 0.38989E-03

rms(prec ) = 0.63962E-03

weight for this iteration 100.00

eigenvalues of (default mixing \* dielectric matrix)

average eigenvalue GAMMA= 1.4257

2.6940 2.0786 1.3869 0.8957 0.8957 0.6034

Free energy of the ion-electron system (eV)

-----

alpha Z PSCENC = 233.50077011

Ewald energy TEWEN = 91332.05595134

-Hartree energ DENC = -107338.16733192

-exchange EXHF = 0.00000000

-V(xc)+E(xc) XCENC = 1743.77919096

PAW double counting = 52171.83849560 -52234.75195544

entropy T\*S EENTRO = -0.00000000

eigenvalues EBANDS = -5815.35124654

atomic energy EATOM = 18704.32991668

Solvation Ediel\_sol = 0.00000000

-----  
free energy TOTEN = -1202.76620920 eV

energy without entropy = -1202.76620920 energy(sigma->0) = -1202.76620920

----- Iteration 7( 8) -----

|           |          |         |           |        |
|-----------|----------|---------|-----------|--------|
| POTLOK:   | cpu time | 0.1650: | real time | 0.1796 |
| SETDIJ:   | cpu time | 0.0100: | real time | 0.0100 |
| EDDIAG:   | cpu time | 1.9385: | real time | 1.9453 |
| RMM-DIIS: | cpu time | 6.2617: | real time | 6.2805 |
| ORTHCH:   | cpu time | 0.3532: | real time | 0.3542 |
| DOS:      | cpu time | 0.0004: | real time | 0.0004 |
| CHARGE:   | cpu time | 0.5283: | real time | 0.5299 |
| MIXING:   | cpu time | 0.0061: | real time | 0.0061 |
| -----     |          |         |           |        |
| LOOP:     | cpu time | 9.2634: | real time | 9.3060 |

eigenvalue-minimisations : 1719

total energy-change (2. order) :-0.3890184E-04 (-0.2109867E-06)

number of electron 518.9999725 magnetization 0.9999998

augmentation part 11.7346491 magnetization 0.0542744

Broyden mixing:

rms(total) = 0.23738E-03 rms(broyden)= 0.23729E-03

rms(prec ) = 0.44477E-03

weight for this iteration 100.00

eigenvalues of (default mixing \* dielectric matrix)

average eigenvalue GAMMA= 1.4343

2.7619 2.3142 1.5294 1.0050 1.0050 0.8188 0.6061

Free energy of the ion-electron system (eV)

-----

alpha Z PSCENC = 233.50077011

Ewald energy TEWEN = 91332.05595134

-Hartree energy DENC = -107338.06040417

-exchange EXHF = 0.00000000

-V(xc)+E(xc) XCENC = 1743.77859283

PAW double counting = 52172.02624378 -52234.93960541

entropy T\*S EENTRO = -0.00000000

eigenvalues EBANDS = -5815.45771327

atomic energy EATOM = 18704.32991668

Solvation Ediel\_sol = 0.00000000

-----

free energy TOTEN = -1202.76624810 eV

energy without entropy = -1202.76624810 energy(sigma->0) = -1202.76624810

-----

----- Iteration 7( 9) -----

|           |          |         |           |        |
|-----------|----------|---------|-----------|--------|
| POTLOK:   | cpu time | 0.1672: | real time | 0.1815 |
| SETDIJ:   | cpu time | 0.0102: | real time | 0.0102 |
| EDDIAG:   | cpu time | 1.9317: | real time | 1.9378 |
| RMM-DIIS: | cpu time | 6.2633: | real time | 6.2939 |
| ORTHCH:   | cpu time | 0.3522: | real time | 0.3532 |
| DOS:      | cpu time | 0.0004: | real time | 0.0004 |
| CHARGE:   | cpu time | 0.5264: | real time | 0.5280 |
| MIXING:   | cpu time | 0.0063: | real time | 0.0064 |

-----

|       |          |         |           |        |
|-------|----------|---------|-----------|--------|
| LOOP: | cpu time | 9.2578: | real time | 9.3115 |
|-------|----------|---------|-----------|--------|

eigenvalue-minimisations : 1709

total energy-change (2. order) :-0.4641464E-04 (-0.2610849E-06)

|                    |             |               |           |
|--------------------|-------------|---------------|-----------|
| number of electron | 518.9999725 | magnetization | 0.9999998 |
|--------------------|-------------|---------------|-----------|

|                   |            |               |           |
|-------------------|------------|---------------|-----------|
| augmentation part | 11.7346243 | magnetization | 0.0542749 |
|-------------------|------------|---------------|-----------|

Broyden mixing:

rms(total) = 0.15526E-03      rms(broyden)= 0.15513E-03

rms(prec ) = 0.29045E-03

weight for this iteration      100.00

eigenvalues of (default mixing \* dielectric matrix)

average eigenvalue GAMMA=    1.5422

3.3743   2.5311   1.8210   1.3097   0.9818   0.9818   0.7248   0.6132

Free energy of the ion-electron system (eV)

-----

alpha Z          PSCENC =          233.50077011

Ewald energy    TEWEN =          91332.05595134

-Hartree energy DENC =   -107337.94682011

-exchange       EXHF =            0.00000000

-V(xc)+E(xc)    XCENC =          1743.77802398

PAW double counting =    52172.16659078   -52235.07990715

entropy T\*S     EENTRO =          -0.00000000

eigenvalues     EBANDS =       -5815.57082014

atomic energy   EATOM =          18704.32991668

Solvation    Ediel\_sol =          0.00000000

-----  
free energy    TOTEN    =    -1202.76629452 eV

energy without entropy =    -1202.76629452    energy(sigma->0) =    -1202.76629452

----- Iteration    7( 10) -----

|           |          |         |           |        |
|-----------|----------|---------|-----------|--------|
| POTLOK:   | cpu time | 0.1660: | real time | 0.1800 |
| SETDIJ:   | cpu time | 0.0101: | real time | 0.0101 |
| EDDIAG:   | cpu time | 1.9295: | real time | 1.9362 |
| RMM-DIIS: | cpu time | 6.2136: | real time | 6.2360 |
| ORTHCH:   | cpu time | 0.3516: | real time | 0.3528 |
| DOS:      | cpu time | 0.0004: | real time | 0.0004 |
| CHARGE:   | cpu time | 0.5276: | real time | 0.5294 |
| MIXING:   | cpu time | 0.0071: | real time | 0.0071 |

-----  
LOOP:  cpu time    9.2058: real time    9.2519

eigenvalue-minimisations : 1699

total energy-change (2. order) :-0.4452311E-04  (-0.3351922E-06)

number of electron    518.9999725 magnetization        0.9999998

augmentation part    11.7346244 magnetization       0.0542754

Broyden mixing:

rms(total) = 0.90092E-04    rms(broyden)= 0.90006E-04

rms(prec ) = 0.15396E-03

weight for this iteration    100.00

eigenvalues of (default mixing \* dielectric matrix)

average eigenvalue GAMMA=    1.6198

4.2719  2.5696  2.1286  1.2255  1.2255  0.9160  0.9160  0.7103  0.6149

Free energy of the ion-electron system (eV)

-----  
alpha Z           PSCENC =        233.50077011

Ewald energy    TEWEN  =       91332.05595134

-Hartree energ DENC  =   -107337.82753027

-exchange EXHF = 0.00000000  
-V(xc)+E(xc) XCENC = 1743.77732927  
PAW double counting = 52172.21848733 -52235.13173157  
entropy T\*S EENTRO = -0.00000000  
eigenvalues EBANDS = -5815.68953193  
atomic energy EATOM = 18704.32991668  
Solvation Ediel\_sol = 0.00000000

-----  
free energy TOTEN = -1202.76633904 eV

energy without entropy = -1202.76633904 energy(sigma->0) = -1202.76633904

----- Iteration 7( 11) -----

POTLOK: cpu time 0.1659: real time 0.1723

|           |          |         |           |        |
|-----------|----------|---------|-----------|--------|
| SETDIJ:   | cpu time | 0.0101: | real time | 0.0101 |
| EDDIAG:   | cpu time | 1.9264: | real time | 1.9328 |
| RMM-DIIS: | cpu time | 5.9173: | real time | 5.9479 |
| ORTHCH:   | cpu time | 0.3527: | real time | 0.3536 |
| DOS:      | cpu time | 0.0004: | real time | 0.0004 |
| CHARGE:   | cpu time | 0.5256: | real time | 0.5274 |
| MIXING:   | cpu time | 0.0072: | real time | 0.0072 |
| -----     |          |         |           |        |
| LOOP:     | cpu time | 8.9056: | real time | 8.9518 |

eigenvalue-minimisations : 1612

total energy-change (2. order) :-0.1776376E-04 (-0.9800084E-07)

number of electron 518.9999725 magnetization 0.9999998

augmentation part 11.7346259 magnetization 0.0542755

Broyden mixing:

rms(total) = 0.57527E-04 rms(broyden)= 0.57470E-04

rms(prec ) = 0.95524E-04

weight for this iteration 100.00

eigenvalues of (default mixing \* dielectric matrix)

average eigenvalue GAMMA= 1.6895

5.0538 2.6942 2.1806 1.5672 1.1223 1.1223 1.0259 0.8286 0.6180 0.6820

Free energy of the ion-electron system (eV)

-----

alpha Z PSCENC = 233.50077011

Ewald energy TEWEN = 91332.05595134

-Hartree energy DENC = -107337.77554567

-exchange EXHF = 0.00000000

-V(xc)+E(xc) XCENC = 1743.77707251

PAW double counting = 52172.19284783 -52235.10608171

entropy T\*S EENTRO = -0.00000000

eigenvalues EBANDS = -5815.74128790

atomic energy EATOM = 18704.32991668

Solvation Ediel\_sol = 0.00000000

-----

free energy TOTEN = -1202.76635680 eV

energy without entropy = -1202.76635680 energy(sigma->0) = -1202.76635680

-----

----- Iteration 7( 12) -----

POTLOK: cpu time 0.1672: real time 0.1933  
SETDIJ: cpu time 0.0101: real time 0.0101  
EDDIAG: cpu time 1.9284: real time 1.9345  
RMM-DIIS: cpu time 5.6218: real time 5.6423  
ORTHCH: cpu time 0.3521: real time 0.3530  
DOS: cpu time 0.0004: real time 0.0004  
CHARGE: cpu time 0.5264: real time 0.5279  
MIXING: cpu time 0.0073: real time 0.0073

-----

LOOP: cpu time 8.6137: real time 8.6689

eigenvalue-minimisations : 1516

total energy-change (2. order) :-0.1019438E-04 (-0.3578034E-07)

number of electron 518.9999725 magnetization 0.9999998

augmentation part 11.7346212 magnetization 0.0542755

Broyden mixing:

rms(total) = 0.34322E-04      rms(broyden)= 0.34288E-04

rms(prec ) = 0.59028E-04

weight for this iteration      100.00

eigenvalues of (default mixing \* dielectric matrix)

average eigenvalue GAMMA=    1.7980

6.3117   2.7397   2.4119   2.0087   1.1878   1.1878   0.9519   0.9519   0.7504   0.6222

0.6535

Free energy of the ion-electron system (eV)

-----

alpha Z          PSCENC =          233.50077011

Ewald energy    TEWEN =          91332.05595134

-Hartree energy DENC =   -107337.75186794

-exchange       EXHF =            0.00000000

-V(xc)+E(xc)    XCENC =          1743.77702713

PAW double counting =    52172.16876679   -52235.08201964

entropy T\*S     EENTRO =          -0.00000000

eigenvalues     EBANDS =       -5815.76491148

atomic energy   EATOM =        18704.32991668

Solvation    Ediel\_sol =          0.00000000

-----  
free energy    TOTEN    =    -1202.76636700 eV

energy without entropy =    -1202.76636700    energy(sigma->0) =    -1202.76636700

----- Iteration        7( 13) -----

|           |          |         |           |        |
|-----------|----------|---------|-----------|--------|
| POTLOK:   | cpu time | 0.1670: | real time | 0.1688 |
| SETDIJ:   | cpu time | 0.0100: | real time | 0.0100 |
| EDDIAG:   | cpu time | 1.9273: | real time | 1.9342 |
| RMM-DIIS: | cpu time | 5.2973: | real time | 5.3205 |
| ORTHCH:   | cpu time | 0.3522: | real time | 0.3534 |
| DOS:      | cpu time | 0.0004: | real time | 0.0004 |
| CHARGE:   | cpu time | 0.5275: | real time | 0.5293 |
| MIXING:   | cpu time | 0.0082: | real time | 0.0083 |

-----  
LOOP:  cpu time    8.2899: real time    8.3250

eigenvalue-minimisations : 1449

total energy-change (2. order) :-0.5859190E-05  (-0.1694890E-07)

number of electron    518.9999725 magnetization        0.9999998

augmentation part    11.7346219 magnetization        0.0542755

Broyden mixing:

rms(total) = 0.20999E-04    rms(broyden)= 0.20990E-04

rms(prec ) = 0.37591E-04

weight for this iteration    100.00

eigenvalues of (default mixing \* dielectric matrix)

average eigenvalue GAMMA=    1.8293

6.7123  2.7597  2.7597  2.0356  1.4188  1.1594  1.1594  1.0012  0.9200  0.7548

0.6238  0.6473

Free energy of the ion-electron system (eV)

-----  
alpha Z           PSCENC =        233.50077011

Ewald energy    TEWEN  =        91332.05595134

-Hartree energ DENC = -107337.73936204

-exchange EXHF = 0.00000000

-V(xc)+E(xc) XCENC = 1743.77700082

PAW double counting = 52172.16048669 -52235.07374233

entropy T\*S EENTRO = -0.00000000

eigenvalues EBANDS = -5815.77739414

atomic energy EATOM = 18704.32991668

Solvation Ediel\_sol = 0.00000000

-----  
free energy TOTEN = -1202.76637286 eV

energy without entropy = -1202.76637286 energy(sigma->0) = -1202.76637286

----- Iteration 7( 14) -----

|           |          |         |           |        |
|-----------|----------|---------|-----------|--------|
| POTLOK:   | cpu time | 0.1754: | real time | 0.1795 |
| SETDIJ:   | cpu time | 0.0101: | real time | 0.0101 |
| EDDIAG:   | cpu time | 1.9273: | real time | 1.9342 |
| RMM-DIIS: | cpu time | 5.2029: | real time | 5.2223 |
| ORTHCH:   | cpu time | 0.3623: | real time | 0.3633 |
| DOS:      | cpu time | 0.0004: | real time | 0.0004 |
| CHARGE:   | cpu time | 0.5270: | real time | 0.5289 |
| MIXING:   | cpu time | 0.0084: | real time | 0.0084 |
| -----     |          |         |           |        |
| LOOP:     | cpu time | 8.2137: | real time | 8.2471 |

eigenvalue-minimisations : 1434

total energy-change (2. order) :-0.4589449E-05 (-0.1265121E-07)

number of electron 518.9999725 magnetization 0.9999998

augmentation part 11.7346237 magnetization 0.0542755

Broyden mixing:

rms(total) = 0.15497E-04 rms(broyden)= 0.15483E-04

rms(prec ) = 0.22560E-04

weight for this iteration 100.00

eigenvalues of (default mixing \* dielectric matrix)

average eigenvalue GAMMA= 1.8645

7.0112 3.5498 2.6609 2.1848 1.8577 1.1551 1.1551 0.9808 0.9808 0.7137  
0.7137 0.6231 0.6525

Free energy of the ion-electron system (eV)

-----

alpha Z PSCENC = 233.50077011

Ewald energy TEWEN = 91332.05595134

-Hartree energy DENC = -107337.73290294

-exchange EXHF = 0.00000000

-V(xc)+E(xc) XCENC = 1743.77699284

PAW double counting = 52172.16744122 -52235.08069153

entropy T\*S EENTRO = -0.00000000

eigenvalues EBANDS = -5815.78385516

atomic energy EATOM = 18704.32991668

Solvation Ediel\_sol = 0.00000000

-----

free energy TOTEN = -1202.76637745 eV

energy without entropy = -1202.76637745 energy(sigma->0) = -1202.76637745

-----

----- Iteration 7( 15) -----

|           |          |         |           |        |
|-----------|----------|---------|-----------|--------|
| POTLOK:   | cpu time | 0.1674: | real time | 0.1684 |
| SETDIJ:   | cpu time | 0.0099: | real time | 0.0100 |
| EDDIAG:   | cpu time | 1.9261: | real time | 1.9321 |
| RMM-DIIS: | cpu time | 4.8473: | real time | 4.8637 |
| ORTHCH:   | cpu time | 0.3517: | real time | 0.3526 |
| DOS:      | cpu time | 0.0004: | real time | 0.0004 |
| CHARGE:   | cpu time | 0.5263: | real time | 0.5280 |
| MIXING:   | cpu time | 0.0088: | real time | 0.0088 |

-----

|       |          |         |           |        |
|-------|----------|---------|-----------|--------|
| LOOP: | cpu time | 7.8380: | real time | 7.8639 |
|-------|----------|---------|-----------|--------|

eigenvalue-minimisations : 1313

total energy-change (2. order) :-0.1484572E-05 (-0.2964199E-08)

number of electron 518.9999725 magnetization 0.9999998

augmentation part            11.7346228 magnetization            0.0542755

Broyden mixing:

rms(total) = 0.85364E-05      rms(broyden)= 0.85308E-05

rms(prec ) = 0.13465E-04

weight for this iteration      100.00

eigenvalues of (default mixing \* dielectric matrix)

average eigenvalue GAMMA=    1.9470

7.6403   4.3480   2.5578   2.5578   1.9458   1.2776   1.2776   1.0280   1.0280   0.8907

0.7801   0.6745   0.6262   0.6262

Free energy of the ion-electron system (eV)

-----

alpha Z            PSCENC =            233.50077011

Ewald energy      TEWEN =            91332.05595134

-Hartree energ DENC =   -107337.73110138

-exchange        EXHF =            0.00000000

-V(xc)+E(xc)      XCENC =            1743.77700111

PAW double counting =    52172.17367445   -52235.08692535

entropy T\*S       EENTRO =            -0.00000000

eigenvalues       EBANDS =            -5815.78566590

atomic energy EATOM = 18704.32991668

Solvation Ediel\_sol = 0.00000000

-----  
free energy TOTEN = -1202.76637893 eV

energy without entropy = -1202.76637893 energy(sigma->0) = -1202.76637893

----- Iteration 7( 16) -----

|           |          |         |           |        |
|-----------|----------|---------|-----------|--------|
| POTLOK:   | cpu time | 0.1666: | real time | 0.1854 |
| SETDIJ:   | cpu time | 0.0101: | real time | 0.0101 |
| EDDIAG:   | cpu time | 1.9359: | real time | 1.9421 |
| RMM-DIIS: | cpu time | 4.8001: | real time | 4.8146 |
| ORTHCH:   | cpu time | 0.3522: | real time | 0.3531 |
| DOS:      | cpu time | 0.0004: | real time | 0.0004 |

CHARGE: cpu time 0.5265: real time 0.5283

MIXING: cpu time 0.0093: real time 0.0093

-----

LOOP: cpu time 7.8012: real time 7.8433

eigenvalue-minimisations : 1304

total energy-change (2. order) :-0.1153370E-05 (-0.1350072E-08)

number of electron 518.9999725 magnetization 0.9999998

augmentation part 11.7346220 magnetization 0.0542755

Broyden mixing:

rms(total) = 0.55531E-05 rms(broyden)= 0.55465E-05

rms(prec ) = 0.86181E-05

weight for this iteration 100.00

eigenvalues of (default mixing \* dielectric matrix)

average eigenvalue GAMMA= 1.9531

7.9416 4.7090 2.7096 2.4812 2.0021 1.3796 1.3796 1.0672 1.0672 0.9116

0.9116 0.8166 0.6708 0.6244 0.6244

Free energy of the ion-electron system (eV)

-----

alpha Z PSCENC = 233.50077011  
Ewald energy TEWEN = 91332.05595134  
-Hartree energy DENC = -107337.73028244  
-exchange EXHF = 0.00000000  
-V(xc)+E(xc) XCENC = 1743.77700986  
PAW double counting = 52172.17858345 -52235.09183535  
entropy T\*S EENTRO = -0.00000000  
eigenvalues EBANDS = -5815.78649374  
atomic energy EATOM = 18704.32991668  
Solvation Ediel\_sol = 0.00000000

-----  
free energy TOTEN = -1202.76638008 eV

energy without entropy = -1202.76638008 energy(sigma->0) = -1202.76638008

|           |          |         |           |        |
|-----------|----------|---------|-----------|--------|
| POTLOK:   | cpu time | 0.1691: | real time | 0.1759 |
| SETDIJ:   | cpu time | 0.0100: | real time | 0.0101 |
| EDDIAG:   | cpu time | 1.9307: | real time | 1.9369 |
| RMM-DIIS: | cpu time | 4.6918: | real time | 4.7108 |
| ORTHCH:   | cpu time | 0.3517: | real time | 0.3527 |
| DOS:      | cpu time | 0.0005: | real time | 0.0005 |
| CHARGE:   | cpu time | 0.5254: | real time | 0.5269 |
| MIXING:   | cpu time | 0.0097: | real time | 0.0097 |
| -----     |          |         |           |        |
| LOOP:     | cpu time | 7.6889: | real time | 7.7235 |

eigenvalue-minimisations : 1266

total energy-change (2. order) :-0.9856667E-06 (-0.5868444E-09)

number of electron 518.9999725 magnetization 0.9999998

augmentation part 11.7346227 magnetization 0.0542756

Broyden mixing:

rms(total) = 0.29884E-05 rms(broyden)= 0.29844E-05

rms(prec ) = 0.50045E-05

weight for this iteration 100.00

eigenvalues of (default mixing \* dielectric matrix)

average eigenvalue GAMMA= 1.9713

8.1473 5.1233 2.8441 2.5214 2.1198 1.8887 1.2604 1.2604 1.0133 1.0133

0.8663 0.7849 0.7849 0.6639 0.6242 0.6242

Free energy of the ion-electron system (eV)

-----  
alpha Z PSCENC = 233.50077011

Ewald energy TEWEN = 91332.05595134

-Hartree energ DENC = -107337.72999445

-exchange EXHF = 0.00000000

-V(xc)+E(xc) XCENC = 1743.77701293

PAW double counting = 52172.17836433 -52235.09161614

entropy T\*S EENTRO = -0.00000000

eigenvalues EBANDS = -5815.78678588

atomic energy EATOM = 18704.32991668

Solvation Ediel\_sol = 0.00000000

-----  
free energy TOTEN = -1202.76638107 eV

energy without entropy = -1202.76638107 energy(sigma->0) = -1202.76638107

-----

----- Iteration 7( 18) -----

|           |          |         |           |        |
|-----------|----------|---------|-----------|--------|
| POTLOK:   | cpu time | 0.1668: | real time | 0.1783 |
| SETDIJ:   | cpu time | 0.0100: | real time | 0.0101 |
| EDDIAG:   | cpu time | 1.9255: | real time | 1.9313 |
| RMM-DIIS: | cpu time | 4.6122: | real time | 4.6368 |
| ORTHCH:   | cpu time | 0.3518: | real time | 0.3529 |
| DOS:      | cpu time | 0.0004: | real time | 0.0004 |
| CHARGE:   | cpu time | 0.5266: | real time | 0.5280 |
| MIXING:   | cpu time | 0.0098: | real time | 0.0098 |
| -----     |          |         |           |        |
| LOOP:     | cpu time | 7.6030: | real time | 7.6476 |

eigenvalue-minimisations : 1214

total energy-change (2. order) :-0.6188420E-06 (-0.3380043E-09)

number of electron      518.9999725 magnetization      0.9999998

augmentation part      11.7346225 magnetization      0.0542756

Broyden mixing:

rms(total) = 0.18813E-05      rms(broyden)= 0.18800E-05

rms(prec ) = 0.30684E-05

weight for this iteration      100.00

eigenvalues of (default mixing \* dielectric matrix)

average eigenvalue GAMMA=      2.0391

8.4184   5.6363   3.4419   2.6531   2.3620   1.9704   1.3710   1.3710   1.0704   1.0704

0.9376   0.9376   0.8166   0.7055   0.6529   0.6251   0.6251

Free energy of the ion-electron system (eV)

-----

alpha Z      PSCENC =      233.50077011

Ewald energy      TEWEN =      91332.05595134

-Hartree energ      DENC =      -107337.72988322

-exchange      EXHF =      0.00000000

-V(xc)+E(xc)      XCENC =      1743.77701935

PAW double counting =      52172.17724323      -52235.09049604

entropy T\*S    EENTRO =        -0.00000000

eigenvalues    EBANDS =       -5815.78690314

atomic energy   EATOM =       18704.32991668

Solvation    Ediel\_sol =        0.00000000

-----

free energy    TOTEN =       -1202.76638169 eV

energy without entropy =    -1202.76638169    energy(sigma->0) =    -1202.76638169

-----

----- Iteration        7( 19) -----

POTLOK:    cpu time    0.1667: real time    0.1731

SETDIJ:    cpu time    0.0100: real time    0.0100

EDDIAG:    cpu time    1.9262: real time    1.9326

RMM-DIIS:    cpu time    4.3504: real time    4.3824

ORTHCH: cpu time 0.3526: real time 0.3537

DOS: cpu time 0.0004: real time 0.0004

CHARGE: cpu time 0.5268: real time 0.5285

MIXING: cpu time 0.0106: real time 0.0106

-----

LOOP: cpu time 7.3438: real time 7.3913

eigenvalue-minimisations : 1066

total energy-change (2. order) :-0.1389053E-06 (-0.1303970E-09)

number of electron 518.9999725 magnetization 0.9999998

augmentation part 11.7346223 magnetization 0.0542756

Broyden mixing:

rms(total) = 0.12728E-05 rms(broyden)= 0.12717E-05

rms(prec ) = 0.18956E-05

weight for this iteration 100.00

eigenvalues of (default mixing \* dielectric matrix)

average eigenvalue GAMMA= 2.0369

8.5887 5.8850 3.7893 2.6078 2.4506 1.9594 1.7031 1.2431 1.2431 1.0096

1.0096 0.8770 0.8550 0.8550 0.6901 0.6462 0.6259 0.6259

Free energy of the ion-electron system (eV)

-----

alpha Z        PSCENC =        233.50077011

Ewald energy    TEWEN =        91332.05595134

-Hartree energy DENC =   -107337.72977979

-exchange       EXHF =            0.00000000

-V(xc)+E(xc)   XCENC =        1743.77702392

PAW double counting =    52172.17638940   -52235.08964272

entropy T\*S     EENTRO =        -0.00000000

eigenvalues     EBANDS =        -5815.78701077

atomic energy   EATOM =        18704.32991668

Solvation    Ediel\_sol =        0.00000000

-----

free energy     TOTEN =        -1202.76638183 eV

energy without entropy =   -1202.76638183    energy(sigma->0) =   -1202.76638183

-----

----- Iteration 7( 20) -----

POTLOK: cpu time 0.1658: real time 0.1820  
SETDIJ: cpu time 0.0099: real time 0.0100  
EDDIAG: cpu time 1.9263: real time 1.9328  
RMM-DIIS: cpu time 4.0824: real time 4.0952  
ORTHCH: cpu time 0.3539: real time 0.3550  
DOS: cpu time 0.0004: real time 0.0004

-----

LOOP: cpu time 6.5387: real time 6.5753

eigenvalue-minimisations : 923

total energy-change (2. order) :-0.2884190E-07 (-0.6986411E-10)

number of electron 518.9999725 magnetization 0.9999998

augmentation part 11.7346223 magnetization 0.0542756

Free energy of the ion-electron system (eV)

-----

alpha Z PSCENC = 233.50077011

Ewald energy TEWEN = 91332.05595134

-Hartree energ DENC = -107337.72971084

-exchange EXHF = 0.00000000

-V(xc)+E(xc) XCENC = 1743.77702350

PAW double counting = 52172.17618307 -52235.08943589

entropy T\*S EENTRO = -0.00000000

eigenvalues EBANDS = -5815.78707983

atomic energy EATOM = 18704.32991668

Solvation Ediel\_sol = 0.00000000

-----  
free energy TOTEN = -1202.76638186 eV

energy without entropy = -1202.76638186 energy(sigma->0) = -1202.76638186

-----  
average (electrostatic) potential at core

the test charge radii are 0.5201 0.6991 1.0621 0.7215

(the norm of the test charge is 1.0000)

|              |              |              |              |              |
|--------------|--------------|--------------|--------------|--------------|
| 1 -40.7553   | 2 -40.7533   | 3 -40.7546   | 4 -40.7534   | 5 -40.7553   |
| 6 -40.7575   | 7 -40.7549   | 8 -40.7628   | 9 -40.7545   | 10 -40.7622  |
| 11 -40.7560  | 12 -40.7580  | 13 -40.6541  | 14 -40.6990  | 15 -40.7739  |
| 16 -40.7012  | 17 -40.6948  | 18 -40.8630  | 19 -40.6824  | 20 -40.6706  |
| 21 -40.6916  | 22 -40.6642  | 23 -40.0836  | 24 -40.1314  | 25 -57.4616  |
| 26 -57.6729  | 27 -57.6596  | 28 -57.4716  | 29 -57.6669  | 30 -57.4616  |
| 31 -57.6727  | 32 -57.6592  | 33 -57.4696  | 34 -57.6718  | 35 -57.4624  |
| 36 -57.6746  | 37 -57.6592  | 38 -57.4718  | 39 -57.6776  | 40 -57.4614  |
| 41 -57.6786  | 42 -57.6594  | 43 -57.4767  | 44 -57.6922  | 45 -57.4614  |
| 46 -57.6775  | 47 -57.6602  | 48 -57.4769  | 49 -57.6833  | 50 -57.4626  |
| 51 -57.6742  | 52 -57.6599  | 53 -57.4746  | 54 -57.6696  | 55 -57.6396  |
| 56 -57.6657  | 57 -57.6904  | 58 -57.6871  | 59 -57.6694  | 60 -57.6721  |
| 61 -57.6938  | 62 -57.6786  | 63 -57.6398  | 64 -57.6652  | 65 -57.6925  |
| 66 -57.6985  | 67 -57.6677  | 68 -57.6719  | 69 -57.6976  | 70 -57.7052  |
| 71 -57.6393  | 72 -57.6666  | 73 -57.7001  | 74 -57.7257  | 75 -57.6685  |
| 76 -57.6725  | 77 -57.7099  | 78 -57.7562  | 79 -57.6395  | 80 -57.6692  |
| 81 -57.7139  | 82 -57.7561  | 83 -57.6718  | 84 -57.6740  | 85 -57.7414  |
| 86 -57.8465  | 87 -57.6419  | 88 -57.6699  | 89 -57.7158  | 90 -57.7210  |
| 91 -57.6766  | 92 -57.6743  | 93 -57.7459  | 94 -57.7644  | 95 -57.6403  |
| 96 -57.6680  | 97 -57.6995  | 98 -57.6944  | 99 -57.6738  | 100 -57.6730 |
| 101 -57.7117 | 102 -57.6899 | 103 -57.6633 | 104 -57.6341 | 105 -57.6495 |
| 106 -57.2950 | 107 -57.3913 | 108 -57.6343 | 109 -57.6020 | 110 -57.6622 |

|              |              |              |              |              |
|--------------|--------------|--------------|--------------|--------------|
| 111 -57.6340 | 112 -57.6461 | 113 -57.3145 | 114 -57.3971 | 115 -57.6335 |
| 116 -57.6040 | 117 -57.6615 | 118 -57.6257 | 119 -57.7024 | 120 -57.6904 |
| 121 -57.3906 | 122 -57.6323 | 123 -57.7144 | 124 -57.6624 | 125 -57.6286 |
| 126 -57.8393 | 127 -58.3323 | 128 -57.3639 | 129 -57.6376 | 130 -58.1528 |
| 131 -57.6705 | 132 -57.6379 | 133 -57.8067 | 134 -57.4229 | 135 -57.3754 |
| 136 -57.6416 | 137 -58.0870 | 138 -57.6668 | 139 -57.6336 | 140 -57.6754 |
| 141 -57.3043 | 142 -57.3814 | 143 -57.6369 | 144 -57.6523 | 145 -60.8075 |
| 146 -57.3154 | 147 -81.1856 |              |              |              |

E-fermi : -2.3810      XC(G=0): -2.7340      alpha+bet : -2.2521

spin component 1

k-point    1 :        0.0000    0.0000    0.0000

| band No. | band energies | occupation |
|----------|---------------|------------|
| 1        | -26.8137      | 1.00000    |
| 2        | -21.5728      | 1.00000    |
| 3        | -21.4749      | 1.00000    |
| 4        | -21.1056      | 1.00000    |

|    |          |         |
|----|----------|---------|
| 5  | -21.0724 | 1.00000 |
| 6  | -21.0191 | 1.00000 |
| 7  | -20.9820 | 1.00000 |
| 8  | -20.9801 | 1.00000 |
| 9  | -20.8946 | 1.00000 |
| 10 | -20.5645 | 1.00000 |
| 11 | -20.5072 | 1.00000 |
| 12 | -20.4152 | 1.00000 |
| 13 | -20.4014 | 1.00000 |
| 14 | -20.1334 | 1.00000 |
| 15 | -19.9796 | 1.00000 |
| 16 | -19.7117 | 1.00000 |
| 17 | -19.6317 | 1.00000 |
| 18 | -19.6034 | 1.00000 |
| 19 | -19.5877 | 1.00000 |
| 20 | -19.5319 | 1.00000 |
| 21 | -19.5302 | 1.00000 |
| 22 | -19.5022 | 1.00000 |
| 23 | -19.4845 | 1.00000 |
| 24 | -19.1195 | 1.00000 |
| 25 | -19.0795 | 1.00000 |
| 26 | -18.9827 | 1.00000 |

|    |          |         |
|----|----------|---------|
| 27 | -18.9682 | 1.00000 |
| 28 | -18.9067 | 1.00000 |
| 29 | -18.7372 | 1.00000 |
| 30 | -18.5128 | 1.00000 |
| 31 | -18.3632 | 1.00000 |
| 32 | -18.2789 | 1.00000 |
| 33 | -18.2556 | 1.00000 |
| 34 | -18.1877 | 1.00000 |
| 35 | -18.1856 | 1.00000 |
| 36 | -18.0833 | 1.00000 |
| 37 | -18.0794 | 1.00000 |
| 38 | -17.5723 | 1.00000 |
| 39 | -17.3172 | 1.00000 |
| 40 | -17.2918 | 1.00000 |
| 41 | -17.2864 | 1.00000 |
| 42 | -17.2136 | 1.00000 |
| 43 | -17.2068 | 1.00000 |
| 44 | -17.1826 | 1.00000 |
| 45 | -17.0274 | 1.00000 |
| 46 | -16.9540 | 1.00000 |
| 47 | -16.9362 | 1.00000 |
| 48 | -16.8966 | 1.00000 |

|    |          |         |
|----|----------|---------|
| 49 | -16.8947 | 1.00000 |
| 50 | -16.8534 | 1.00000 |
| 51 | -16.8451 | 1.00000 |
| 52 | -16.8254 | 1.00000 |
| 53 | -16.8226 | 1.00000 |
| 54 | -16.7326 | 1.00000 |
| 55 | -16.7295 | 1.00000 |
| 56 | -16.1887 | 1.00000 |
| 57 | -15.7331 | 1.00000 |
| 58 | -15.6956 | 1.00000 |
| 59 | -15.6646 | 1.00000 |
| 60 | -15.6413 | 1.00000 |
| 61 | -15.6194 | 1.00000 |
| 62 | -15.5571 | 1.00000 |
| 63 | -15.5531 | 1.00000 |
| 64 | -15.1837 | 1.00000 |
| 65 | -14.8142 | 1.00000 |
| 66 | -14.6133 | 1.00000 |
| 67 | -14.5812 | 1.00000 |
| 68 | -14.5381 | 1.00000 |
| 69 | -14.5017 | 1.00000 |
| 70 | -14.4724 | 1.00000 |

|    |          |         |
|----|----------|---------|
| 71 | -14.4467 | 1.00000 |
| 72 | -14.3377 | 1.00000 |
| 73 | -14.3092 | 1.00000 |
| 74 | -14.2830 | 1.00000 |
| 75 | -14.2757 | 1.00000 |
| 76 | -14.1856 | 1.00000 |
| 77 | -14.1818 | 1.00000 |
| 78 | -13.8938 | 1.00000 |
| 79 | -13.7650 | 1.00000 |
| 80 | -13.5978 | 1.00000 |
| 81 | -13.5519 | 1.00000 |
| 82 | -13.5328 | 1.00000 |
| 83 | -13.5020 | 1.00000 |
| 84 | -13.4505 | 1.00000 |
| 85 | -13.3673 | 1.00000 |
| 86 | -13.3488 | 1.00000 |
| 87 | -13.1937 | 1.00000 |
| 88 | -12.7901 | 1.00000 |
| 89 | -12.7632 | 1.00000 |
| 90 | -12.7310 | 1.00000 |
| 91 | -12.6993 | 1.00000 |
| 92 | -12.6899 | 1.00000 |

|     |          |         |
|-----|----------|---------|
| 93  | -12.6277 | 1.00000 |
| 94  | -12.4643 | 1.00000 |
| 95  | -12.4494 | 1.00000 |
| 96  | -12.3856 | 1.00000 |
| 97  | -12.3282 | 1.00000 |
| 98  | -12.2162 | 1.00000 |
| 99  | -12.2065 | 1.00000 |
| 100 | -12.1689 | 1.00000 |
| 101 | -11.9463 | 1.00000 |
| 102 | -11.6886 | 1.00000 |
| 103 | -11.6289 | 1.00000 |
| 104 | -11.6143 | 1.00000 |
| 105 | -11.5706 | 1.00000 |
| 106 | -11.0955 | 1.00000 |
| 107 | -11.0528 | 1.00000 |
| 108 | -10.9010 | 1.00000 |
| 109 | -10.8905 | 1.00000 |
| 110 | -10.8338 | 1.00000 |
| 111 | -10.7140 | 1.00000 |
| 112 | -10.6807 | 1.00000 |
| 113 | -10.6645 | 1.00000 |
| 114 | -10.6500 | 1.00000 |

|     |          |         |
|-----|----------|---------|
| 115 | -10.5925 | 1.00000 |
| 116 | -10.5840 | 1.00000 |
| 117 | -10.5755 | 1.00000 |
| 118 | -10.5716 | 1.00000 |
| 119 | -10.5293 | 1.00000 |
| 120 | -10.5285 | 1.00000 |
| 121 | -10.5137 | 1.00000 |
| 122 | -10.5059 | 1.00000 |
| 123 | -10.3823 | 1.00000 |
| 124 | -10.2946 | 1.00000 |
| 125 | -10.2592 | 1.00000 |
| 126 | -10.1906 | 1.00000 |
| 127 | -10.1895 | 1.00000 |
| 128 | -10.0382 | 1.00000 |
| 129 | -9.9923  | 1.00000 |
| 130 | -9.8898  | 1.00000 |
| 131 | -9.8630  | 1.00000 |
| 132 | -9.7950  | 1.00000 |
| 133 | -9.7891  | 1.00000 |
| 134 | -9.7470  | 1.00000 |
| 135 | -9.6797  | 1.00000 |
| 136 | -9.4481  | 1.00000 |

|     |         |         |
|-----|---------|---------|
| 137 | -9.4268 | 1.00000 |
| 138 | -9.3977 | 1.00000 |
| 139 | -9.3908 | 1.00000 |
| 140 | -9.3811 | 1.00000 |
| 141 | -9.3719 | 1.00000 |
| 142 | -9.3134 | 1.00000 |
| 143 | -9.3061 | 1.00000 |
| 144 | -9.2939 | 1.00000 |
| 145 | -9.2843 | 1.00000 |
| 146 | -9.2707 | 1.00000 |
| 147 | -9.0929 | 1.00000 |
| 148 | -9.0065 | 1.00000 |
| 149 | -8.9793 | 1.00000 |
| 150 | -8.9602 | 1.00000 |
| 151 | -8.9482 | 1.00000 |
| 152 | -8.7956 | 1.00000 |
| 153 | -8.7486 | 1.00000 |
| 154 | -8.7378 | 1.00000 |
| 155 | -8.7210 | 1.00000 |
| 156 | -8.7118 | 1.00000 |
| 157 | -8.6904 | 1.00000 |
| 158 | -8.6803 | 1.00000 |

|     |         |         |
|-----|---------|---------|
| 159 | -8.6718 | 1.00000 |
| 160 | -8.6564 | 1.00000 |
| 161 | -8.5972 | 1.00000 |
| 162 | -8.5859 | 1.00000 |
| 163 | -8.5789 | 1.00000 |
| 164 | -8.5705 | 1.00000 |
| 165 | -8.4915 | 1.00000 |
| 166 | -8.4606 | 1.00000 |
| 167 | -8.4390 | 1.00000 |
| 168 | -8.3484 | 1.00000 |
| 169 | -8.3005 | 1.00000 |
| 170 | -8.2770 | 1.00000 |
| 171 | -8.2670 | 1.00000 |
| 172 | -8.2362 | 1.00000 |
| 173 | -8.2351 | 1.00000 |
| 174 | -8.1544 | 1.00000 |
| 175 | -8.1480 | 1.00000 |
| 176 | -8.0798 | 1.00000 |
| 177 | -8.0472 | 1.00000 |
| 178 | -8.0292 | 1.00000 |
| 179 | -8.0246 | 1.00000 |
| 180 | -7.9761 | 1.00000 |

|     |         |         |
|-----|---------|---------|
| 181 | -7.9677 | 1.00000 |
| 182 | -7.9273 | 1.00000 |
| 183 | -7.9036 | 1.00000 |
| 184 | -7.8879 | 1.00000 |
| 185 | -7.8755 | 1.00000 |
| 186 | -7.8034 | 1.00000 |
| 187 | -7.8002 | 1.00000 |
| 188 | -7.7501 | 1.00000 |
| 189 | -7.7135 | 1.00000 |
| 190 | -7.6697 | 1.00000 |
| 191 | -7.6031 | 1.00000 |
| 192 | -7.5881 | 1.00000 |
| 193 | -7.5790 | 1.00000 |
| 194 | -7.5509 | 1.00000 |
| 195 | -7.4835 | 1.00000 |
| 196 | -7.4830 | 1.00000 |
| 197 | -7.4321 | 1.00000 |
| 198 | -7.3281 | 1.00000 |
| 199 | -7.2523 | 1.00000 |
| 200 | -7.1558 | 1.00000 |
| 201 | -7.0693 | 1.00000 |
| 202 | -7.0447 | 1.00000 |

|     |         |         |
|-----|---------|---------|
| 203 | -7.0314 | 1.00000 |
| 204 | -7.0167 | 1.00000 |
| 205 | -6.9997 | 1.00000 |
| 206 | -6.9929 | 1.00000 |
| 207 | -6.9785 | 1.00000 |
| 208 | -6.8694 | 1.00000 |
| 209 | -6.8235 | 1.00000 |
| 210 | -6.8044 | 1.00000 |
| 211 | -6.7962 | 1.00000 |
| 212 | -6.7349 | 1.00000 |
| 213 | -6.6894 | 1.00000 |
| 214 | -6.4746 | 1.00000 |
| 215 | -6.4287 | 1.00000 |
| 216 | -6.3995 | 1.00000 |
| 217 | -6.3941 | 1.00000 |
| 218 | -6.3774 | 1.00000 |
| 219 | -6.3759 | 1.00000 |
| 220 | -6.3206 | 1.00000 |
| 221 | -6.3110 | 1.00000 |
| 222 | -6.2410 | 1.00000 |
| 223 | -6.2326 | 1.00000 |
| 224 | -6.2322 | 1.00000 |

|     |         |         |
|-----|---------|---------|
| 225 | -6.0810 | 1.00000 |
| 226 | -6.0416 | 1.00000 |
| 227 | -5.7962 | 1.00000 |
| 228 | -5.7561 | 1.00000 |
| 229 | -5.6978 | 1.00000 |
| 230 | -5.6441 | 1.00000 |
| 231 | -5.6404 | 1.00000 |
| 232 | -5.5626 | 1.00000 |
| 233 | -5.5333 | 1.00000 |
| 234 | -5.4714 | 1.00000 |
| 235 | -5.4430 | 1.00000 |
| 236 | -5.1680 | 1.00000 |
| 237 | -5.0621 | 1.00000 |
| 238 | -5.0543 | 1.00000 |
| 239 | -5.0216 | 1.00000 |
| 240 | -4.9929 | 1.00000 |
| 241 | -4.9142 | 1.00000 |
| 242 | -4.8568 | 1.00000 |
| 243 | -4.8263 | 1.00000 |
| 244 | -4.7935 | 1.00000 |
| 245 | -4.6833 | 1.00000 |
| 246 | -4.5759 | 1.00000 |

|     |         |         |
|-----|---------|---------|
| 247 | -4.5746 | 1.00000 |
| 248 | -4.5099 | 1.00000 |
| 249 | -4.4488 | 1.00000 |
| 250 | -4.3873 | 1.00000 |
| 251 | -4.2957 | 1.00000 |
| 252 | -4.2700 | 1.00000 |
| 253 | -4.2159 | 1.00000 |
| 254 | -3.5680 | 1.00000 |
| 255 | -3.3578 | 1.00000 |
| 256 | -3.2062 | 1.00000 |
| 257 | -2.9420 | 1.00000 |
| 258 | -2.8515 | 1.00000 |
| 259 | -2.8271 | 1.00000 |
| 260 | -2.6112 | 1.00000 |
| 261 | -1.9113 | 0.00000 |
| 262 | -1.7716 | 0.00000 |
| 263 | -1.7224 | 0.00000 |
| 264 | -1.3492 | 0.00000 |
| 265 | -1.3214 | 0.00000 |
| 266 | -1.2003 | 0.00000 |
| 267 | -0.7487 | 0.00000 |
| 268 | -0.5876 | 0.00000 |

|     |         |         |
|-----|---------|---------|
| 269 | -0.5069 | 0.00000 |
| 270 | -0.3111 | 0.00000 |
| 271 | -0.3091 | 0.00000 |
| 272 | -0.2933 | 0.00000 |
| 273 | -0.1861 | 0.00000 |
| 274 | -0.0610 | 0.00000 |
| 275 | -0.0540 | 0.00000 |
| 276 | -0.0130 | 0.00000 |
| 277 | 0.0320  | 0.00000 |
| 278 | 0.0799  | 0.00000 |
| 279 | 0.1699  | 0.00000 |
| 280 | 0.2175  | 0.00000 |
| 281 | 0.2448  | 0.00000 |
| 282 | 0.4189  | 0.00000 |
| 283 | 0.4438  | 0.00000 |
| 284 | 0.4787  | 0.00000 |
| 285 | 0.5968  | 0.00000 |
| 286 | 0.6689  | 0.00000 |
| 287 | 0.8181  | 0.00000 |
| 288 | 0.8727  | 0.00000 |
| 289 | 1.0468  | 0.00000 |
| 290 | 1.0867  | 0.00000 |

|     |        |         |
|-----|--------|---------|
| 291 | 1.1168 | 0.00000 |
| 292 | 1.1603 | 0.00000 |
| 293 | 1.2226 | 0.00000 |
| 294 | 1.2431 | 0.00000 |
| 295 | 1.2856 | 0.00000 |
| 296 | 1.3135 | 0.00000 |
| 297 | 1.3451 | 0.00000 |
| 298 | 1.4095 | 0.00000 |
| 299 | 1.4641 | 0.00000 |
| 300 | 1.4837 | 0.00000 |
| 301 | 1.5508 | 0.00000 |
| 302 | 1.5855 | 0.00000 |
| 303 | 1.6227 | 0.00000 |
| 304 | 1.6766 | 0.00000 |
| 305 | 1.7493 | 0.00000 |
| 306 | 1.7615 | 0.00000 |
| 307 | 1.8722 | 0.00000 |
| 308 | 1.8917 | 0.00000 |
| 309 | 1.9037 | 0.00000 |
| 310 | 1.9115 | 0.00000 |
| 311 | 2.1270 | 0.00000 |
| 312 | 2.1889 | 0.00000 |

|     |        |         |
|-----|--------|---------|
| 313 | 2.2068 | 0.00000 |
| 314 | 2.2336 | 0.00000 |
| 315 | 2.2745 | 0.00000 |
| 316 | 2.2915 | 0.00000 |
| 317 | 2.3311 | 0.00000 |
| 318 | 2.3516 | 0.00000 |
| 319 | 2.3703 | 0.00000 |
| 320 | 2.3960 | 0.00000 |
| 321 | 2.4172 | 0.00000 |
| 322 | 2.4292 | 0.00000 |
| 323 | 2.4395 | 0.00000 |
| 324 | 2.4532 | 0.00000 |
| 325 | 2.4617 | 0.00000 |
| 326 | 2.5260 | 0.00000 |
| 327 | 2.5402 | 0.00000 |
| 328 | 2.7017 | 0.00000 |
| 329 | 2.7286 | 0.00000 |
| 330 | 2.7517 | 0.00000 |
| 331 | 2.7552 | 0.00000 |
| 332 | 2.7648 | 0.00000 |
| 333 | 2.8118 | 0.00000 |
| 334 | 2.8316 | 0.00000 |

|     |        |         |
|-----|--------|---------|
| 335 | 2.8638 | 0.00000 |
| 336 | 2.8910 | 0.00000 |
| 337 | 2.9233 | 0.00000 |
| 338 | 2.9456 | 0.00000 |
| 339 | 2.9779 | 0.00000 |
| 340 | 3.0046 | 0.00000 |
| 341 | 3.0334 | 0.00000 |
| 342 | 3.0431 | 0.00000 |
| 343 | 3.0658 | 0.00000 |
| 344 | 3.0838 | 0.00000 |
| 345 | 3.1508 | 0.00000 |
| 346 | 3.1624 | 0.00000 |
| 347 | 3.1799 | 0.00000 |
| 348 | 3.1921 | 0.00000 |
| 349 | 3.3019 | 0.00000 |
| 350 | 3.3240 | 0.00000 |
| 351 | 3.3532 | 0.00000 |
| 352 | 3.3680 | 0.00000 |
| 353 | 3.3900 | 0.00000 |
| 354 | 3.4347 | 0.00000 |
| 355 | 3.4770 | 0.00000 |
| 356 | 3.4825 | 0.00000 |

|     |        |         |
|-----|--------|---------|
| 357 | 3.4857 | 0.00000 |
| 358 | 3.4961 | 0.00000 |
| 359 | 3.6348 | 0.00000 |
| 360 | 3.6730 | 0.00000 |
| 361 | 3.6881 | 0.00000 |
| 362 | 3.7343 | 0.00000 |
| 363 | 3.7494 | 0.00000 |
| 364 | 3.7574 | 0.00000 |
| 365 | 3.7722 | 0.00000 |
| 366 | 3.7929 | 0.00000 |
| 367 | 3.8106 | 0.00000 |
| 368 | 3.8320 | 0.00000 |
| 369 | 3.8369 | 0.00000 |
| 370 | 3.8527 | 0.00000 |
| 371 | 3.8756 | 0.00000 |
| 372 | 3.8826 | 0.00000 |
| 373 | 3.9102 | 0.00000 |
| 374 | 3.9227 | 0.00000 |
| 375 | 3.9333 | 0.00000 |
| 376 | 3.9575 | 0.00000 |
| 377 | 3.9718 | 0.00000 |
| 378 | 3.9849 | 0.00000 |

|     |        |         |
|-----|--------|---------|
| 379 | 4.0165 | 0.00000 |
| 380 | 4.0696 | 0.00000 |
| 381 | 4.1649 | 0.00000 |
| 382 | 4.2465 | 0.00000 |
| 383 | 4.2583 | 0.00000 |
| 384 | 4.2586 | 0.00000 |
| 385 | 4.2857 | 0.00000 |
| 386 | 4.3140 | 0.00000 |
| 387 | 4.3277 | 0.00000 |
| 388 | 4.3416 | 0.00000 |
| 389 | 4.3701 | 0.00000 |
| 390 | 4.3800 | 0.00000 |
| 391 | 4.4174 | 0.00000 |
| 392 | 4.4451 | 0.00000 |
| 393 | 4.4693 | 0.00000 |
| 394 | 4.4804 | 0.00000 |
| 395 | 4.4864 | 0.00000 |
| 396 | 4.4962 | 0.00000 |
| 397 | 4.5179 | 0.00000 |
| 398 | 4.5500 | 0.00000 |
| 399 | 4.5899 | 0.00000 |
| 400 | 4.6079 | 0.00000 |

|     |        |         |
|-----|--------|---------|
| 401 | 4.6267 | 0.00000 |
| 402 | 4.6423 | 0.00000 |
| 403 | 4.6567 | 0.00000 |
| 404 | 4.6791 | 0.00000 |
| 405 | 4.7035 | 0.00000 |
| 406 | 4.7314 | 0.00000 |
| 407 | 4.7469 | 0.00000 |
| 408 | 4.7676 | 0.00000 |
| 409 | 4.7828 | 0.00000 |
| 410 | 4.7839 | 0.00000 |
| 411 | 4.7973 | 0.00000 |
| 412 | 4.8292 | 0.00000 |
| 413 | 4.8632 | 0.00000 |
| 414 | 4.8716 | 0.00000 |
| 415 | 4.8981 | 0.00000 |
| 416 | 4.9317 | 0.00000 |
| 417 | 4.9835 | 0.00000 |
| 418 | 5.0041 | 0.00000 |
| 419 | 5.0104 | 0.00000 |
| 420 | 5.0346 | 0.00000 |
| 421 | 5.0385 | 0.00000 |
| 422 | 5.0642 | 0.00000 |

|     |        |         |
|-----|--------|---------|
| 423 | 5.0814 | 0.00000 |
| 424 | 5.1151 | 0.00000 |
| 425 | 5.1174 | 0.00000 |
| 426 | 5.1367 | 0.00000 |
| 427 | 5.1406 | 0.00000 |
| 428 | 5.1519 | 0.00000 |
| 429 | 5.1747 | 0.00000 |
| 430 | 5.1846 | 0.00000 |
| 431 | 5.1879 | 0.00000 |
| 432 | 5.2165 | 0.00000 |
| 433 | 5.2345 | 0.00000 |
| 434 | 5.2414 | 0.00000 |
| 435 | 5.2558 | 0.00000 |
| 436 | 5.2880 | 0.00000 |
| 437 | 5.2945 | 0.00000 |
| 438 | 5.3087 | 0.00000 |
| 439 | 5.3322 | 0.00000 |
| 440 | 5.3483 | 0.00000 |
| 441 | 5.3661 | 0.00000 |
| 442 | 5.3731 | 0.00000 |
| 443 | 5.3907 | 0.00000 |
| 444 | 5.4213 | 0.00000 |

|     |        |         |
|-----|--------|---------|
| 445 | 5.4528 | 0.00000 |
| 446 | 5.4636 | 0.00000 |
| 447 | 5.4813 | 0.00000 |
| 448 | 5.4945 | 0.00000 |
| 449 | 5.5170 | 0.00000 |
| 450 | 5.5489 | 0.00000 |
| 451 | 5.5673 | 0.00000 |
| 452 | 5.5742 | 0.00000 |
| 453 | 5.5956 | 0.00000 |
| 454 | 5.6130 | 0.00000 |
| 455 | 5.6576 | 0.00000 |
| 456 | 5.6807 | 0.00000 |
| 457 | 5.7090 | 0.00000 |
| 458 | 5.7227 | 0.00000 |
| 459 | 5.7438 | 0.00000 |
| 460 | 5.7576 | 0.00000 |
| 461 | 5.7810 | 0.00000 |
| 462 | 5.7881 | 0.00000 |
| 463 | 5.7941 | 0.00000 |
| 464 | 5.7996 | 0.00000 |
| 465 | 5.8071 | 0.00000 |
| 466 | 5.8230 | 0.00000 |

|     |        |         |
|-----|--------|---------|
| 467 | 5.8418 | 0.00000 |
| 468 | 5.8542 | 0.00000 |
| 469 | 5.8720 | 0.00000 |
| 470 | 5.8793 | 0.00000 |
| 471 | 5.8849 | 0.00000 |
| 472 | 5.9072 | 0.00000 |
| 473 | 5.9137 | 0.00000 |
| 474 | 5.9397 | 0.00000 |
| 475 | 5.9526 | 0.00000 |
| 476 | 5.9716 | 0.00000 |
| 477 | 5.9790 | 0.00000 |
| 478 | 6.0032 | 0.00000 |
| 479 | 6.0111 | 0.00000 |
| 480 | 6.0738 | 0.00000 |

spin component 2

k-point 1 : 0.0000 0.0000 0.0000

| band No. | band energies | occupation |
|----------|---------------|------------|
| 1        | -26.8069      | 1.00000    |
| 2        | -21.5716      | 1.00000    |
| 3        | -21.4733      | 1.00000    |

|    |          |         |
|----|----------|---------|
| 4  | -21.1037 | 1.00000 |
| 5  | -21.0715 | 1.00000 |
| 6  | -21.0164 | 1.00000 |
| 7  | -20.9806 | 1.00000 |
| 8  | -20.9782 | 1.00000 |
| 9  | -20.8840 | 1.00000 |
| 10 | -20.5616 | 1.00000 |
| 11 | -20.5039 | 1.00000 |
| 12 | -20.4041 | 1.00000 |
| 13 | -20.3917 | 1.00000 |
| 14 | -20.1293 | 1.00000 |
| 15 | -19.9563 | 1.00000 |
| 16 | -19.7090 | 1.00000 |
| 17 | -19.6304 | 1.00000 |
| 18 | -19.6013 | 1.00000 |
| 19 | -19.5814 | 1.00000 |
| 20 | -19.5306 | 1.00000 |
| 21 | -19.5284 | 1.00000 |
| 22 | -19.4795 | 1.00000 |
| 23 | -19.4649 | 1.00000 |
| 24 | -19.1171 | 1.00000 |
| 25 | -19.0771 | 1.00000 |

|    |          |         |
|----|----------|---------|
| 26 | -18.9728 | 1.00000 |
| 27 | -18.9586 | 1.00000 |
| 28 | -18.9019 | 1.00000 |
| 29 | -18.7075 | 1.00000 |
| 30 | -18.5098 | 1.00000 |
| 31 | -18.3562 | 1.00000 |
| 32 | -18.2508 | 1.00000 |
| 33 | -18.2304 | 1.00000 |
| 34 | -18.1824 | 1.00000 |
| 35 | -18.1802 | 1.00000 |
| 36 | -18.0631 | 1.00000 |
| 37 | -18.0597 | 1.00000 |
| 38 | -17.5689 | 1.00000 |
| 39 | -17.3012 | 1.00000 |
| 40 | -17.2912 | 1.00000 |
| 41 | -17.2769 | 1.00000 |
| 42 | -17.2113 | 1.00000 |
| 43 | -17.2099 | 1.00000 |
| 44 | -17.1797 | 1.00000 |
| 45 | -17.0235 | 1.00000 |
| 46 | -16.9452 | 1.00000 |
| 47 | -16.9260 | 1.00000 |

|    |          |         |
|----|----------|---------|
| 48 | -16.8740 | 1.00000 |
| 49 | -16.8729 | 1.00000 |
| 50 | -16.8326 | 1.00000 |
| 51 | -16.8266 | 1.00000 |
| 52 | -16.8216 | 1.00000 |
| 53 | -16.8189 | 1.00000 |
| 54 | -16.7345 | 1.00000 |
| 55 | -16.7283 | 1.00000 |
| 56 | -16.1860 | 1.00000 |
| 57 | -15.7323 | 1.00000 |
| 58 | -15.6619 | 1.00000 |
| 59 | -15.6478 | 1.00000 |
| 60 | -15.6242 | 1.00000 |
| 61 | -15.5699 | 1.00000 |
| 62 | -15.5311 | 1.00000 |
| 63 | -15.5283 | 1.00000 |
| 64 | -15.1800 | 1.00000 |
| 65 | -14.8120 | 1.00000 |
| 66 | -14.6112 | 1.00000 |
| 67 | -14.5637 | 1.00000 |
| 68 | -14.5037 | 1.00000 |
| 69 | -14.5019 | 1.00000 |

|    |          |         |
|----|----------|---------|
| 70 | -14.4683 | 1.00000 |
| 71 | -14.4422 | 1.00000 |
| 72 | -14.3343 | 1.00000 |
| 73 | -14.3016 | 1.00000 |
| 74 | -14.2713 | 1.00000 |
| 75 | -14.2672 | 1.00000 |
| 76 | -14.1675 | 1.00000 |
| 77 | -14.1642 | 1.00000 |
| 78 | -13.8929 | 1.00000 |
| 79 | -13.7626 | 1.00000 |
| 80 | -13.5953 | 1.00000 |
| 81 | -13.5414 | 1.00000 |
| 82 | -13.5217 | 1.00000 |
| 83 | -13.4984 | 1.00000 |
| 84 | -13.4488 | 1.00000 |
| 85 | -13.3469 | 1.00000 |
| 86 | -13.3441 | 1.00000 |
| 87 | -13.1921 | 1.00000 |
| 88 | -12.7840 | 1.00000 |
| 89 | -12.7537 | 1.00000 |
| 90 | -12.7223 | 1.00000 |
| 91 | -12.6807 | 1.00000 |

|     |          |         |
|-----|----------|---------|
| 92  | -12.6740 | 1.00000 |
| 93  | -12.6255 | 1.00000 |
| 94  | -12.4518 | 1.00000 |
| 95  | -12.4346 | 1.00000 |
| 96  | -12.3820 | 1.00000 |
| 97  | -12.3273 | 1.00000 |
| 98  | -12.2116 | 1.00000 |
| 99  | -12.2013 | 1.00000 |
| 100 | -12.1673 | 1.00000 |
| 101 | -11.9436 | 1.00000 |
| 102 | -11.6858 | 1.00000 |
| 103 | -11.6109 | 1.00000 |
| 104 | -11.5951 | 1.00000 |
| 105 | -11.5650 | 1.00000 |
| 106 | -11.0937 | 1.00000 |
| 107 | -11.0496 | 1.00000 |
| 108 | -10.8917 | 1.00000 |
| 109 | -10.8800 | 1.00000 |
| 110 | -10.8309 | 1.00000 |
| 111 | -10.7080 | 1.00000 |
| 112 | -10.6795 | 1.00000 |
| 113 | -10.6617 | 1.00000 |

|     |          |         |
|-----|----------|---------|
| 114 | -10.6450 | 1.00000 |
| 115 | -10.5846 | 1.00000 |
| 116 | -10.5773 | 1.00000 |
| 117 | -10.5725 | 1.00000 |
| 118 | -10.5686 | 1.00000 |
| 119 | -10.5187 | 1.00000 |
| 120 | -10.5178 | 1.00000 |
| 121 | -10.5046 | 1.00000 |
| 122 | -10.4999 | 1.00000 |
| 123 | -10.3815 | 1.00000 |
| 124 | -10.2938 | 1.00000 |
| 125 | -10.2584 | 1.00000 |
| 126 | -10.1872 | 1.00000 |
| 127 | -10.1861 | 1.00000 |
| 128 | -10.0331 | 1.00000 |
| 129 | -9.9823  | 1.00000 |
| 130 | -9.8871  | 1.00000 |
| 131 | -9.8596  | 1.00000 |
| 132 | -9.7863  | 1.00000 |
| 133 | -9.7800  | 1.00000 |
| 134 | -9.7451  | 1.00000 |
| 135 | -9.6765  | 1.00000 |

|     |         |         |
|-----|---------|---------|
| 136 | -9.4462 | 1.00000 |
| 137 | -9.4234 | 1.00000 |
| 138 | -9.3870 | 1.00000 |
| 139 | -9.3818 | 1.00000 |
| 140 | -9.3729 | 1.00000 |
| 141 | -9.3624 | 1.00000 |
| 142 | -9.3110 | 1.00000 |
| 143 | -9.3038 | 1.00000 |
| 144 | -9.2932 | 1.00000 |
| 145 | -9.2816 | 1.00000 |
| 146 | -9.2497 | 1.00000 |
| 147 | -9.0917 | 1.00000 |
| 148 | -9.0029 | 1.00000 |
| 149 | -8.9691 | 1.00000 |
| 150 | -8.9460 | 1.00000 |
| 151 | -8.9403 | 1.00000 |
| 152 | -8.7931 | 1.00000 |
| 153 | -8.7407 | 1.00000 |
| 154 | -8.7354 | 1.00000 |
| 155 | -8.7154 | 1.00000 |
| 156 | -8.7083 | 1.00000 |
| 157 | -8.6731 | 1.00000 |

|     |         |         |
|-----|---------|---------|
| 158 | -8.6669 | 1.00000 |
| 159 | -8.6591 | 1.00000 |
| 160 | -8.6557 | 1.00000 |
| 161 | -8.5798 | 1.00000 |
| 162 | -8.5738 | 1.00000 |
| 163 | -8.5689 | 1.00000 |
| 164 | -8.5522 | 1.00000 |
| 165 | -8.4911 | 1.00000 |
| 166 | -8.4600 | 1.00000 |
| 167 | -8.4374 | 1.00000 |
| 168 | -8.3458 | 1.00000 |
| 169 | -8.2976 | 1.00000 |
| 170 | -8.2752 | 1.00000 |
| 171 | -8.2363 | 1.00000 |
| 172 | -8.2325 | 1.00000 |
| 173 | -8.2304 | 1.00000 |
| 174 | -8.1443 | 1.00000 |
| 175 | -8.1367 | 1.00000 |
| 176 | -8.0765 | 1.00000 |
| 177 | -8.0451 | 1.00000 |
| 178 | -8.0166 | 1.00000 |
| 179 | -8.0096 | 1.00000 |

|     |         |         |
|-----|---------|---------|
| 180 | -7.9716 | 1.00000 |
| 181 | -7.9626 | 1.00000 |
| 182 | -7.9233 | 1.00000 |
| 183 | -7.8941 | 1.00000 |
| 184 | -7.8740 | 1.00000 |
| 185 | -7.8666 | 1.00000 |
| 186 | -7.7947 | 1.00000 |
| 187 | -7.7909 | 1.00000 |
| 188 | -7.7406 | 1.00000 |
| 189 | -7.6821 | 1.00000 |
| 190 | -7.6394 | 1.00000 |
| 191 | -7.6009 | 1.00000 |
| 192 | -7.5802 | 1.00000 |
| 193 | -7.5580 | 1.00000 |
| 194 | -7.5434 | 1.00000 |
| 195 | -7.4755 | 1.00000 |
| 196 | -7.4753 | 1.00000 |
| 197 | -7.4310 | 1.00000 |
| 198 | -7.3272 | 1.00000 |
| 199 | -7.2390 | 1.00000 |
| 200 | -7.1526 | 1.00000 |
| 201 | -7.0592 | 1.00000 |

|     |         |         |
|-----|---------|---------|
| 202 | -7.0393 | 1.00000 |
| 203 | -7.0184 | 1.00000 |
| 204 | -6.9885 | 1.00000 |
| 205 | -6.9807 | 1.00000 |
| 206 | -6.9756 | 1.00000 |
| 207 | -6.9441 | 1.00000 |
| 208 | -6.8658 | 1.00000 |
| 209 | -6.8193 | 1.00000 |
| 210 | -6.7983 | 1.00000 |
| 211 | -6.7911 | 1.00000 |
| 212 | -6.7281 | 1.00000 |
| 213 | -6.6801 | 1.00000 |
| 214 | -6.4714 | 1.00000 |
| 215 | -6.3986 | 1.00000 |
| 216 | -6.3862 | 1.00000 |
| 217 | -6.3813 | 1.00000 |
| 218 | -6.3666 | 1.00000 |
| 219 | -6.3418 | 1.00000 |
| 220 | -6.3077 | 1.00000 |
| 221 | -6.2790 | 1.00000 |
| 222 | -6.2326 | 1.00000 |
| 223 | -6.2310 | 1.00000 |

|     |         |         |
|-----|---------|---------|
| 224 | -6.2266 | 1.00000 |
| 225 | -6.0503 | 1.00000 |
| 226 | -6.0130 | 1.00000 |
| 227 | -5.7597 | 1.00000 |
| 228 | -5.7153 | 1.00000 |
| 229 | -5.6962 | 1.00000 |
| 230 | -5.6386 | 1.00000 |
| 231 | -5.6262 | 1.00000 |
| 232 | -5.5475 | 1.00000 |
| 233 | -5.5265 | 1.00000 |
| 234 | -5.4450 | 1.00000 |
| 235 | -5.4155 | 1.00000 |
| 236 | -5.1458 | 1.00000 |
| 237 | -5.0633 | 1.00000 |
| 238 | -5.0301 | 1.00000 |
| 239 | -5.0259 | 1.00000 |
| 240 | -4.9635 | 1.00000 |
| 241 | -4.8813 | 1.00000 |
| 242 | -4.8576 | 1.00000 |
| 243 | -4.8066 | 1.00000 |
| 244 | -4.7816 | 1.00000 |
| 245 | -4.6531 | 1.00000 |

|     |         |         |
|-----|---------|---------|
| 246 | -4.5821 | 1.00000 |
| 247 | -4.5790 | 1.00000 |
| 248 | -4.4799 | 1.00000 |
| 249 | -4.4245 | 1.00000 |
| 250 | -4.3984 | 1.00000 |
| 251 | -4.2995 | 1.00000 |
| 252 | -4.2312 | 1.00000 |
| 253 | -4.1785 | 1.00000 |
| 254 | -3.5419 | 1.00000 |
| 255 | -3.3124 | 1.00000 |
| 256 | -3.1469 | 1.00000 |
| 257 | -2.9469 | 1.00000 |
| 258 | -2.8024 | 1.00000 |
| 259 | -2.7438 | 1.00000 |
| 260 | -2.0644 | 0.00000 |
| 261 | -1.9173 | 0.00000 |
| 262 | -1.7263 | 0.00000 |
| 263 | -1.6826 | 0.00000 |
| 264 | -1.3083 | 0.00000 |
| 265 | -1.2864 | 0.00000 |
| 266 | -1.1641 | 0.00000 |
| 267 | -0.7274 | 0.00000 |

|     |         |         |
|-----|---------|---------|
| 268 | -0.5870 | 0.00000 |
| 269 | -0.5144 | 0.00000 |
| 270 | -0.2840 | 0.00000 |
| 271 | -0.2810 | 0.00000 |
| 272 | -0.2632 | 0.00000 |
| 273 | -0.1595 | 0.00000 |
| 274 | -0.0621 | 0.00000 |
| 275 | -0.0516 | 0.00000 |
| 276 | 0.0108  | 0.00000 |
| 277 | 0.0372  | 0.00000 |
| 278 | 0.0748  | 0.00000 |
| 279 | 0.2051  | 0.00000 |
| 280 | 0.2526  | 0.00000 |
| 281 | 0.2765  | 0.00000 |
| 282 | 0.4310  | 0.00000 |
| 283 | 0.4496  | 0.00000 |
| 284 | 0.4801  | 0.00000 |
| 285 | 0.6013  | 0.00000 |
| 286 | 0.6892  | 0.00000 |
| 287 | 0.8210  | 0.00000 |
| 288 | 0.8795  | 0.00000 |
| 289 | 1.0567  | 0.00000 |

|     |        |         |
|-----|--------|---------|
| 290 | 1.1037 | 0.00000 |
| 291 | 1.1395 | 0.00000 |
| 292 | 1.1743 | 0.00000 |
| 293 | 1.2314 | 0.00000 |
| 294 | 1.2493 | 0.00000 |
| 295 | 1.3068 | 0.00000 |
| 296 | 1.3188 | 0.00000 |
| 297 | 1.3587 | 0.00000 |
| 298 | 1.4287 | 0.00000 |
| 299 | 1.4774 | 0.00000 |
| 300 | 1.5007 | 0.00000 |
| 301 | 1.5759 | 0.00000 |
| 302 | 1.6017 | 0.00000 |
| 303 | 1.6505 | 0.00000 |
| 304 | 1.6854 | 0.00000 |
| 305 | 1.7570 | 0.00000 |
| 306 | 1.7715 | 0.00000 |
| 307 | 1.8773 | 0.00000 |
| 308 | 1.8971 | 0.00000 |
| 309 | 1.9067 | 0.00000 |
| 310 | 1.9185 | 0.00000 |
| 311 | 2.1427 | 0.00000 |

|     |        |         |
|-----|--------|---------|
| 312 | 2.1994 | 0.00000 |
| 313 | 2.2186 | 0.00000 |
| 314 | 2.2529 | 0.00000 |
| 315 | 2.2885 | 0.00000 |
| 316 | 2.2960 | 0.00000 |
| 317 | 2.3365 | 0.00000 |
| 318 | 2.3595 | 0.00000 |
| 319 | 2.3811 | 0.00000 |
| 320 | 2.4059 | 0.00000 |
| 321 | 2.4265 | 0.00000 |
| 322 | 2.4343 | 0.00000 |
| 323 | 2.4497 | 0.00000 |
| 324 | 2.4586 | 0.00000 |
| 325 | 2.4666 | 0.00000 |
| 326 | 2.5286 | 0.00000 |
| 327 | 2.5459 | 0.00000 |
| 328 | 2.7068 | 0.00000 |
| 329 | 2.7349 | 0.00000 |
| 330 | 2.7518 | 0.00000 |
| 331 | 2.7581 | 0.00000 |
| 332 | 2.7737 | 0.00000 |
| 333 | 2.8261 | 0.00000 |

|     |        |         |
|-----|--------|---------|
| 334 | 2.8445 | 0.00000 |
| 335 | 2.8765 | 0.00000 |
| 336 | 2.9024 | 0.00000 |
| 337 | 2.9320 | 0.00000 |
| 338 | 2.9551 | 0.00000 |
| 339 | 2.9827 | 0.00000 |
| 340 | 3.0062 | 0.00000 |
| 341 | 3.0373 | 0.00000 |
| 342 | 3.0500 | 0.00000 |
| 343 | 3.0715 | 0.00000 |
| 344 | 3.0913 | 0.00000 |
| 345 | 3.1533 | 0.00000 |
| 346 | 3.1706 | 0.00000 |
| 347 | 3.1887 | 0.00000 |
| 348 | 3.2006 | 0.00000 |
| 349 | 3.3075 | 0.00000 |
| 350 | 3.3287 | 0.00000 |
| 351 | 3.3615 | 0.00000 |
| 352 | 3.3716 | 0.00000 |
| 353 | 3.3933 | 0.00000 |
| 354 | 3.4402 | 0.00000 |
| 355 | 3.4824 | 0.00000 |

|     |        |         |
|-----|--------|---------|
| 356 | 3.4905 | 0.00000 |
| 357 | 3.4930 | 0.00000 |
| 358 | 3.5023 | 0.00000 |
| 359 | 3.6398 | 0.00000 |
| 360 | 3.6769 | 0.00000 |
| 361 | 3.7005 | 0.00000 |
| 362 | 3.7396 | 0.00000 |
| 363 | 3.7535 | 0.00000 |
| 364 | 3.7593 | 0.00000 |
| 365 | 3.7771 | 0.00000 |
| 366 | 3.7976 | 0.00000 |
| 367 | 3.8134 | 0.00000 |
| 368 | 3.8396 | 0.00000 |
| 369 | 3.8471 | 0.00000 |
| 370 | 3.8663 | 0.00000 |
| 371 | 3.8793 | 0.00000 |
| 372 | 3.8916 | 0.00000 |
| 373 | 3.9217 | 0.00000 |
| 374 | 3.9344 | 0.00000 |
| 375 | 3.9473 | 0.00000 |
| 376 | 3.9597 | 0.00000 |
| 377 | 3.9826 | 0.00000 |

|     |        |         |
|-----|--------|---------|
| 378 | 3.9872 | 0.00000 |
| 379 | 4.0223 | 0.00000 |
| 380 | 4.0790 | 0.00000 |
| 381 | 4.1713 | 0.00000 |
| 382 | 4.2602 | 0.00000 |
| 383 | 4.2616 | 0.00000 |
| 384 | 4.2697 | 0.00000 |
| 385 | 4.2933 | 0.00000 |
| 386 | 4.3222 | 0.00000 |
| 387 | 4.3345 | 0.00000 |
| 388 | 4.3508 | 0.00000 |
| 389 | 4.3799 | 0.00000 |
| 390 | 4.3847 | 0.00000 |
| 391 | 4.4232 | 0.00000 |
| 392 | 4.4491 | 0.00000 |
| 393 | 4.4747 | 0.00000 |
| 394 | 4.4831 | 0.00000 |
| 395 | 4.4925 | 0.00000 |
| 396 | 4.4994 | 0.00000 |
| 397 | 4.5215 | 0.00000 |
| 398 | 4.5545 | 0.00000 |
| 399 | 4.5930 | 0.00000 |

|     |        |         |
|-----|--------|---------|
| 400 | 4.6106 | 0.00000 |
| 401 | 4.6284 | 0.00000 |
| 402 | 4.6459 | 0.00000 |
| 403 | 4.6598 | 0.00000 |
| 404 | 4.6850 | 0.00000 |
| 405 | 4.7083 | 0.00000 |
| 406 | 4.7372 | 0.00000 |
| 407 | 4.7518 | 0.00000 |
| 408 | 4.7710 | 0.00000 |
| 409 | 4.7862 | 0.00000 |
| 410 | 4.7894 | 0.00000 |
| 411 | 4.8029 | 0.00000 |
| 412 | 4.8339 | 0.00000 |
| 413 | 4.8689 | 0.00000 |
| 414 | 4.8843 | 0.00000 |
| 415 | 4.9033 | 0.00000 |
| 416 | 4.9423 | 0.00000 |
| 417 | 4.9934 | 0.00000 |
| 418 | 5.0095 | 0.00000 |
| 419 | 5.0127 | 0.00000 |
| 420 | 5.0377 | 0.00000 |
| 421 | 5.0438 | 0.00000 |

|     |        |         |
|-----|--------|---------|
| 422 | 5.0685 | 0.00000 |
| 423 | 5.0857 | 0.00000 |
| 424 | 5.1185 | 0.00000 |
| 425 | 5.1216 | 0.00000 |
| 426 | 5.1407 | 0.00000 |
| 427 | 5.1441 | 0.00000 |
| 428 | 5.1687 | 0.00000 |
| 429 | 5.1793 | 0.00000 |
| 430 | 5.1881 | 0.00000 |
| 431 | 5.1927 | 0.00000 |
| 432 | 5.2214 | 0.00000 |
| 433 | 5.2369 | 0.00000 |
| 434 | 5.2448 | 0.00000 |
| 435 | 5.2614 | 0.00000 |
| 436 | 5.2968 | 0.00000 |
| 437 | 5.3018 | 0.00000 |
| 438 | 5.3117 | 0.00000 |
| 439 | 5.3365 | 0.00000 |
| 440 | 5.3523 | 0.00000 |
| 441 | 5.3699 | 0.00000 |
| 442 | 5.3806 | 0.00000 |
| 443 | 5.3937 | 0.00000 |

|     |        |         |
|-----|--------|---------|
| 444 | 5.4297 | 0.00000 |
| 445 | 5.4591 | 0.00000 |
| 446 | 5.4703 | 0.00000 |
| 447 | 5.4867 | 0.00000 |
| 448 | 5.4991 | 0.00000 |
| 449 | 5.5237 | 0.00000 |
| 450 | 5.5673 | 0.00000 |
| 451 | 5.5729 | 0.00000 |
| 452 | 5.5934 | 0.00000 |
| 453 | 5.6081 | 0.00000 |
| 454 | 5.6227 | 0.00000 |
| 455 | 5.6699 | 0.00000 |
| 456 | 5.6915 | 0.00000 |
| 457 | 5.7179 | 0.00000 |
| 458 | 5.7272 | 0.00000 |
| 459 | 5.7482 | 0.00000 |
| 460 | 5.7626 | 0.00000 |
| 461 | 5.7888 | 0.00000 |
| 462 | 5.7910 | 0.00000 |
| 463 | 5.7972 | 0.00000 |
| 464 | 5.8034 | 0.00000 |
| 465 | 5.8198 | 0.00000 |

|     |        |         |
|-----|--------|---------|
| 466 | 5.8253 | 0.00000 |
| 467 | 5.8542 | 0.00000 |
| 468 | 5.8611 | 0.00000 |
| 469 | 5.8799 | 0.00000 |
| 470 | 5.8855 | 0.00000 |
| 471 | 5.8896 | 0.00000 |
| 472 | 5.9057 | 0.00000 |
| 473 | 5.9216 | 0.00000 |
| 474 | 5.9484 | 0.00000 |
| 475 | 5.9557 | 0.00000 |
| 476 | 5.9725 | 0.00000 |
| 477 | 5.9780 | 0.00000 |
| 478 | 5.9977 | 0.00000 |
| 479 | 6.0175 | 0.00000 |
| 480 | 6.0528 | 0.00000 |

-----

soft charge-density along one line, spin component

1

0

1

2

3

4

5

6

7

8 9

total charge-density along one line

soft charge-density along one line, spin component 2

0 1 2 3 4 5 6 7

8 9

total charge-density along one line

pseudopotential strength for first ion, spin component: 1

-2.331 -4.014 -0.002 0.000 0.000

-4.014 -6.828 -0.006 0.000 -0.000

-0.002 -0.006 -0.336 -0.000 0.000

0.000 0.000 -0.000 -0.341 -0.000

0.000 -0.000 0.000 -0.000 -0.341

pseudopotential strength for first ion, spin component: 2

-2.331 -4.014 -0.002 0.000 0.000

-4.014 -6.828 -0.006 0.000 -0.000

-0.002 -0.006 -0.336 -0.000 0.000

0.000 0.000 -0.000 -0.341 -0.000

0.000 -0.000 0.000 -0.000 -0.341

total augmentation occupancy for first ion, spin component: 1

3.579 -0.646 0.444 -0.034 -0.000

-0.646 0.130 -0.082 0.006 0.000

0.444 -0.082 0.056 -0.003 -0.000

-0.034 0.006 -0.003 0.011 0.000

-0.000 0.000 -0.000 0.000 0.007

total augmentation occupancy for first ion, spin component: 2

-0.000 0.000 -0.000 0.000 0.000

0.000 -0.000 0.000 -0.000 -0.000

-0.000 0.000 -0.000 -0.000 -0.000

0.000 -0.000 -0.000 -0.000 -0.000

0.000 -0.000 -0.000 -0.000 -0.000

----- aborting loop because EDIFF is reached -----

total charge

# of ion s p d tot

-----

|    |       |       |       |       |
|----|-------|-------|-------|-------|
| 1  | 0.646 | 0.043 | 0.000 | 0.690 |
| 2  | 0.646 | 0.043 | 0.000 | 0.690 |
| 3  | 0.646 | 0.043 | 0.000 | 0.690 |
| 4  | 0.646 | 0.043 | 0.000 | 0.690 |
| 5  | 0.646 | 0.043 | 0.000 | 0.690 |
| 6  | 0.646 | 0.043 | 0.000 | 0.690 |
| 7  | 0.646 | 0.043 | 0.000 | 0.690 |
| 8  | 0.646 | 0.043 | 0.000 | 0.690 |
| 9  | 0.646 | 0.043 | 0.000 | 0.690 |
| 10 | 0.646 | 0.043 | 0.000 | 0.690 |
| 11 | 0.646 | 0.043 | 0.000 | 0.690 |
| 12 | 0.646 | 0.043 | 0.000 | 0.690 |
| 13 | 0.646 | 0.043 | 0.000 | 0.689 |
| 14 | 0.646 | 0.043 | 0.000 | 0.689 |
| 15 | 0.648 | 0.045 | 0.000 | 0.693 |
| 16 | 0.646 | 0.043 | 0.000 | 0.689 |
| 17 | 0.646 | 0.043 | 0.000 | 0.689 |
| 18 | 0.646 | 0.043 | 0.000 | 0.689 |
| 19 | 0.646 | 0.043 | 0.000 | 0.689 |
| 20 | 0.646 | 0.043 | 0.000 | 0.689 |
| 21 | 0.646 | 0.043 | 0.000 | 0.689 |
| 22 | 0.646 | 0.044 | 0.000 | 0.690 |

|    |       |       |       |       |
|----|-------|-------|-------|-------|
| 23 | 0.542 | 0.015 | 0.000 | 0.557 |
| 24 | 0.541 | 0.015 | 0.000 | 0.556 |
| 25 | 0.870 | 1.763 | 0.000 | 2.633 |
| 26 | 0.867 | 1.785 | 0.000 | 2.653 |
| 27 | 0.867 | 1.786 | 0.000 | 2.653 |
| 28 | 0.870 | 1.762 | 0.000 | 2.632 |
| 29 | 0.865 | 1.783 | 0.000 | 2.648 |
| 30 | 0.870 | 1.763 | 0.000 | 2.633 |
| 31 | 0.867 | 1.786 | 0.000 | 2.653 |
| 32 | 0.867 | 1.786 | 0.000 | 2.653 |
| 33 | 0.870 | 1.762 | 0.000 | 2.632 |
| 34 | 0.865 | 1.783 | 0.000 | 2.648 |
| 35 | 0.870 | 1.763 | 0.000 | 2.633 |
| 36 | 0.868 | 1.787 | 0.000 | 2.654 |
| 37 | 0.867 | 1.786 | 0.000 | 2.653 |
| 38 | 0.870 | 1.763 | 0.000 | 2.633 |
| 39 | 0.865 | 1.784 | 0.000 | 2.649 |
| 40 | 0.870 | 1.763 | 0.000 | 2.633 |
| 41 | 0.868 | 1.787 | 0.000 | 2.655 |
| 42 | 0.867 | 1.786 | 0.000 | 2.653 |
| 43 | 0.871 | 1.764 | 0.000 | 2.634 |
| 44 | 0.865 | 1.783 | 0.000 | 2.648 |

|    |       |       |       |       |
|----|-------|-------|-------|-------|
| 45 | 0.870 | 1.763 | 0.000 | 2.633 |
| 46 | 0.867 | 1.786 | 0.000 | 2.653 |
| 47 | 0.867 | 1.786 | 0.000 | 2.653 |
| 48 | 0.871 | 1.763 | 0.000 | 2.634 |
| 49 | 0.865 | 1.783 | 0.000 | 2.648 |
| 50 | 0.870 | 1.763 | 0.000 | 2.633 |
| 51 | 0.867 | 1.786 | 0.000 | 2.653 |
| 52 | 0.867 | 1.786 | 0.000 | 2.653 |
| 53 | 0.870 | 1.762 | 0.000 | 2.632 |
| 54 | 0.865 | 1.784 | 0.000 | 2.648 |
| 55 | 0.865 | 1.784 | 0.000 | 2.649 |
| 56 | 0.865 | 1.786 | 0.000 | 2.651 |
| 57 | 0.866 | 1.787 | 0.000 | 2.653 |
| 58 | 0.866 | 1.790 | 0.000 | 2.656 |
| 59 | 0.865 | 1.786 | 0.000 | 2.651 |
| 60 | 0.866 | 1.786 | 0.000 | 2.651 |
| 61 | 0.866 | 1.788 | 0.000 | 2.654 |
| 62 | 0.867 | 1.791 | 0.000 | 2.658 |
| 63 | 0.865 | 1.784 | 0.000 | 2.649 |
| 64 | 0.865 | 1.786 | 0.000 | 2.651 |
| 65 | 0.866 | 1.787 | 0.000 | 2.652 |
| 66 | 0.865 | 1.788 | 0.000 | 2.653 |

|    |       |       |       |       |
|----|-------|-------|-------|-------|
| 67 | 0.865 | 1.786 | 0.000 | 2.651 |
| 68 | 0.866 | 1.785 | 0.000 | 2.651 |
| 69 | 0.865 | 1.787 | 0.000 | 2.652 |
| 70 | 0.866 | 1.787 | 0.000 | 2.653 |
| 71 | 0.865 | 1.784 | 0.000 | 2.649 |
| 72 | 0.865 | 1.786 | 0.000 | 2.651 |
| 73 | 0.866 | 1.786 | 0.000 | 2.652 |
| 74 | 0.864 | 1.785 | 0.000 | 2.649 |
| 75 | 0.865 | 1.786 | 0.000 | 2.651 |
| 76 | 0.866 | 1.786 | 0.000 | 2.651 |
| 77 | 0.865 | 1.786 | 0.000 | 2.651 |
| 78 | 0.865 | 1.784 | 0.000 | 2.649 |
| 79 | 0.865 | 1.784 | 0.000 | 2.649 |
| 80 | 0.865 | 1.786 | 0.000 | 2.651 |
| 81 | 0.865 | 1.785 | 0.000 | 2.650 |
| 82 | 0.863 | 1.782 | 0.000 | 2.645 |
| 83 | 0.865 | 1.786 | 0.000 | 2.651 |
| 84 | 0.866 | 1.786 | 0.000 | 2.651 |
| 85 | 0.865 | 1.784 | 0.000 | 2.648 |
| 86 | 0.862 | 1.774 | 0.000 | 2.636 |
| 87 | 0.865 | 1.784 | 0.000 | 2.649 |
| 88 | 0.865 | 1.787 | 0.000 | 2.652 |

|     |       |       |       |       |
|-----|-------|-------|-------|-------|
| 89  | 0.865 | 1.785 | 0.000 | 2.650 |
| 90  | 0.865 | 1.788 | 0.000 | 2.653 |
| 91  | 0.865 | 1.786 | 0.000 | 2.651 |
| 92  | 0.866 | 1.786 | 0.000 | 2.651 |
| 93  | 0.864 | 1.783 | 0.000 | 2.647 |
| 94  | 0.866 | 1.785 | 0.000 | 2.651 |
| 95  | 0.865 | 1.784 | 0.000 | 2.649 |
| 96  | 0.865 | 1.786 | 0.000 | 2.651 |
| 97  | 0.866 | 1.787 | 0.000 | 2.653 |
| 98  | 0.866 | 1.789 | 0.000 | 2.655 |
| 99  | 0.865 | 1.786 | 0.000 | 2.651 |
| 100 | 0.866 | 1.786 | 0.000 | 2.651 |
| 101 | 0.865 | 1.787 | 0.000 | 2.652 |
| 102 | 0.867 | 1.790 | 0.000 | 2.657 |
| 103 | 0.865 | 1.786 | 0.000 | 2.651 |
| 104 | 0.867 | 1.785 | 0.000 | 2.653 |
| 105 | 0.866 | 1.786 | 0.000 | 2.652 |
| 106 | 0.870 | 1.778 | 0.000 | 2.648 |
| 107 | 0.869 | 1.765 | 0.000 | 2.635 |
| 108 | 0.865 | 1.783 | 0.000 | 2.648 |
| 109 | 0.869 | 1.789 | 0.000 | 2.658 |
| 110 | 0.865 | 1.786 | 0.000 | 2.651 |

|     |       |       |       |       |
|-----|-------|-------|-------|-------|
| 111 | 0.867 | 1.785 | 0.000 | 2.653 |
| 112 | 0.867 | 1.789 | 0.000 | 2.655 |
| 113 | 0.871 | 1.782 | 0.000 | 2.653 |
| 114 | 0.869 | 1.765 | 0.000 | 2.634 |
| 115 | 0.865 | 1.783 | 0.000 | 2.648 |
| 116 | 0.870 | 1.791 | 0.000 | 2.661 |
| 117 | 0.865 | 1.786 | 0.000 | 2.651 |
| 118 | 0.867 | 1.786 | 0.000 | 2.653 |
| 119 | 0.865 | 1.782 | 0.000 | 2.647 |
| 120 | 0.857 | 1.707 | 0.000 | 2.564 |
| 121 | 0.869 | 1.765 | 0.000 | 2.634 |
| 122 | 0.865 | 1.783 | 0.000 | 2.648 |
| 123 | 0.866 | 1.778 | 0.000 | 2.644 |
| 124 | 0.866 | 1.786 | 0.000 | 2.652 |
| 125 | 0.868 | 1.785 | 0.000 | 2.653 |
| 126 | 0.862 | 1.776 | 0.000 | 2.638 |
| 127 | 0.851 | 1.837 | 0.000 | 2.688 |
| 128 | 0.870 | 1.767 | 0.000 | 2.637 |
| 129 | 0.865 | 1.783 | 0.000 | 2.648 |
| 130 | 0.860 | 1.757 | 0.000 | 2.617 |
| 131 | 0.866 | 1.786 | 0.000 | 2.652 |
| 132 | 0.867 | 1.784 | 0.000 | 2.652 |

|     |       |       |       |       |
|-----|-------|-------|-------|-------|
| 133 | 0.864 | 1.787 | 0.000 | 2.651 |
| 134 | 0.869 | 1.789 | 0.000 | 2.659 |
| 135 | 0.869 | 1.767 | 0.000 | 2.636 |
| 136 | 0.865 | 1.783 | 0.000 | 2.648 |
| 137 | 0.866 | 1.772 | 0.000 | 2.638 |
| 138 | 0.866 | 1.786 | 0.000 | 2.652 |
| 139 | 0.867 | 1.785 | 0.000 | 2.652 |
| 140 | 0.866 | 1.788 | 0.000 | 2.654 |
| 141 | 0.870 | 1.779 | 0.000 | 2.649 |
| 142 | 0.869 | 1.766 | 0.000 | 2.635 |
| 143 | 0.865 | 1.783 | 0.000 | 2.648 |
| 144 | 0.869 | 1.790 | 0.000 | 2.659 |
| 145 | 0.940 | 1.713 | 0.000 | 2.653 |
| 146 | 1.240 | 1.545 | 0.075 | 2.860 |
| 147 | 1.632 | 3.515 | 0.000 | 5.147 |

-----

tot            123.061 221.537    0.075 344.673

magnetization (x)

| # of ion | s | p | d | tot |
|----------|---|---|---|-----|
|----------|---|---|---|-----|

-----

|    |        |        |       |        |
|----|--------|--------|-------|--------|
| 1  | 0.000  | -0.000 | 0.000 | 0.000  |
| 2  | -0.000 | 0.000  | 0.000 | -0.000 |
| 3  | 0.000  | -0.000 | 0.000 | 0.000  |
| 4  | -0.000 | 0.000  | 0.000 | -0.000 |
| 5  | 0.000  | -0.000 | 0.000 | 0.000  |
| 6  | -0.000 | 0.000  | 0.000 | -0.000 |
| 7  | 0.000  | -0.000 | 0.000 | 0.000  |
| 8  | -0.000 | 0.000  | 0.000 | -0.000 |
| 9  | 0.000  | -0.000 | 0.000 | 0.000  |
| 10 | -0.000 | 0.000  | 0.000 | -0.000 |
| 11 | 0.000  | -0.000 | 0.000 | 0.000  |
| 12 | -0.000 | 0.000  | 0.000 | -0.000 |
| 13 | 0.000  | -0.000 | 0.000 | 0.000  |
| 14 | -0.004 | 0.002  | 0.000 | -0.002 |
| 15 | 0.000  | -0.000 | 0.000 | 0.000  |
| 16 | -0.004 | 0.002  | 0.000 | -0.002 |
| 17 | -0.004 | 0.002  | 0.000 | -0.002 |
| 18 | 0.000  | -0.000 | 0.000 | 0.000  |
| 19 | -0.003 | 0.001  | 0.000 | -0.002 |
| 20 | 0.000  | -0.000 | 0.000 | 0.000  |

|    |        |        |       |        |
|----|--------|--------|-------|--------|
| 21 | -0.003 | 0.002  | 0.000 | -0.002 |
| 22 | -0.003 | 0.002  | 0.000 | -0.002 |
| 23 | -0.000 | 0.000  | 0.000 | -0.000 |
| 24 | -0.000 | 0.000  | 0.000 | -0.000 |
| 25 | -0.000 | -0.007 | 0.000 | -0.008 |
| 26 | -0.000 | -0.002 | 0.000 | -0.002 |
| 27 | 0.000  | 0.003  | 0.000 | 0.003  |
| 28 | 0.000  | 0.005  | 0.000 | 0.005  |
| 29 | 0.000  | 0.003  | 0.000 | 0.003  |
| 30 | -0.000 | -0.007 | 0.000 | -0.008 |
| 31 | -0.000 | -0.002 | 0.000 | -0.002 |
| 32 | 0.000  | 0.003  | 0.000 | 0.003  |
| 33 | 0.000  | 0.005  | 0.000 | 0.005  |
| 34 | 0.000  | 0.002  | 0.000 | 0.002  |
| 35 | -0.000 | -0.007 | 0.000 | -0.008 |
| 36 | -0.000 | -0.002 | 0.000 | -0.002 |
| 37 | 0.000  | 0.003  | 0.000 | 0.003  |
| 38 | 0.000  | 0.006  | 0.000 | 0.007  |
| 39 | 0.000  | 0.002  | 0.000 | 0.002  |
| 40 | -0.000 | -0.007 | 0.000 | -0.008 |
| 41 | -0.000 | -0.002 | 0.000 | -0.002 |
| 42 | 0.000  | 0.002  | 0.000 | 0.003  |

|    |        |        |       |        |
|----|--------|--------|-------|--------|
| 43 | 0.000  | 0.005  | 0.000 | 0.006  |
| 44 | 0.000  | 0.004  | 0.000 | 0.004  |
| 45 | -0.000 | -0.007 | 0.000 | -0.008 |
| 46 | -0.000 | -0.002 | 0.000 | -0.002 |
| 47 | 0.000  | 0.003  | 0.000 | 0.003  |
| 48 | 0.000  | 0.005  | 0.000 | 0.006  |
| 49 | 0.000  | 0.001  | 0.000 | 0.002  |
| 50 | -0.000 | -0.007 | 0.000 | -0.008 |
| 51 | -0.000 | -0.002 | 0.000 | -0.002 |
| 52 | 0.000  | 0.002  | 0.000 | 0.003  |
| 53 | 0.000  | 0.006  | 0.000 | 0.007  |
| 54 | 0.000  | 0.002  | 0.000 | 0.002  |
| 55 | -0.000 | -0.005 | 0.000 | -0.006 |
| 56 | -0.000 | -0.007 | 0.000 | -0.007 |
| 57 | -0.000 | -0.001 | 0.000 | -0.001 |
| 58 | -0.000 | -0.001 | 0.000 | -0.001 |
| 59 | 0.000  | 0.006  | 0.000 | 0.007  |
| 60 | 0.000  | 0.003  | 0.000 | 0.003  |
| 61 | 0.000  | 0.001  | 0.000 | 0.001  |
| 62 | 0.000  | 0.003  | 0.000 | 0.003  |
| 63 | -0.000 | -0.005 | 0.000 | -0.006 |
| 64 | -0.000 | -0.007 | 0.000 | -0.007 |

|    |        |        |       |        |
|----|--------|--------|-------|--------|
| 65 | -0.000 | -0.001 | 0.000 | -0.001 |
| 66 | -0.000 | -0.001 | 0.000 | -0.001 |
| 67 | 0.000  | 0.006  | 0.000 | 0.006  |
| 68 | 0.000  | 0.003  | 0.000 | 0.003  |
| 69 | 0.000  | 0.001  | 0.000 | 0.001  |
| 70 | 0.000  | 0.002  | 0.000 | 0.002  |
| 71 | -0.000 | -0.005 | 0.000 | -0.006 |
| 72 | -0.000 | -0.007 | 0.000 | -0.007 |
| 73 | -0.000 | -0.001 | 0.000 | -0.001 |
| 74 | -0.000 | -0.002 | 0.000 | -0.002 |
| 75 | 0.000  | 0.006  | 0.000 | 0.007  |
| 76 | 0.000  | 0.003  | 0.000 | 0.004  |
| 77 | 0.000  | 0.003  | 0.000 | 0.003  |
| 78 | 0.000  | 0.001  | 0.000 | 0.001  |
| 79 | -0.000 | -0.005 | 0.000 | -0.006 |
| 80 | -0.000 | -0.007 | 0.000 | -0.007 |
| 81 | -0.000 | -0.001 | 0.000 | -0.002 |
| 82 | -0.000 | -0.002 | 0.000 | -0.002 |
| 83 | 0.001  | 0.007  | 0.000 | 0.008  |
| 84 | 0.000  | 0.003  | 0.000 | 0.003  |
| 85 | 0.000  | 0.002  | 0.000 | 0.002  |
| 86 | 0.000  | 0.005  | 0.000 | 0.006  |

|     |        |        |       |        |
|-----|--------|--------|-------|--------|
| 87  | -0.000 | -0.005 | 0.000 | -0.005 |
| 88  | -0.000 | -0.007 | 0.000 | -0.007 |
| 89  | -0.000 | -0.001 | 0.000 | -0.002 |
| 90  | -0.000 | -0.002 | 0.000 | -0.002 |
| 91  | 0.001  | 0.008  | 0.000 | 0.008  |
| 92  | 0.000  | 0.003  | 0.000 | 0.003  |
| 93  | 0.000  | 0.002  | 0.000 | 0.003  |
| 94  | 0.000  | 0.001  | 0.000 | 0.001  |
| 95  | -0.000 | -0.005 | 0.000 | -0.006 |
| 96  | -0.000 | -0.007 | 0.000 | -0.007 |
| 97  | -0.000 | -0.001 | 0.000 | -0.001 |
| 98  | -0.000 | -0.001 | 0.000 | -0.001 |
| 99  | 0.001  | 0.007  | 0.000 | 0.007  |
| 100 | 0.000  | 0.003  | 0.000 | 0.004  |
| 101 | 0.000  | 0.003  | 0.000 | 0.003  |
| 102 | 0.000  | 0.002  | 0.000 | 0.002  |
| 103 | -0.001 | -0.010 | 0.000 | -0.011 |
| 104 | -0.003 | -0.028 | 0.000 | -0.031 |
| 105 | -0.000 | -0.001 | 0.000 | -0.002 |
| 106 | -0.000 | -0.004 | 0.000 | -0.005 |
| 107 | 0.007  | 0.116  | 0.000 | 0.122  |
| 108 | 0.001  | 0.010  | 0.000 | 0.011  |

|     |        |        |       |        |
|-----|--------|--------|-------|--------|
| 109 | 0.000  | 0.001  | 0.000 | 0.001  |
| 110 | -0.001 | -0.010 | 0.000 | -0.011 |
| 111 | -0.003 | -0.028 | 0.000 | -0.031 |
| 112 | -0.000 | -0.001 | 0.000 | -0.002 |
| 113 | -0.000 | -0.003 | 0.000 | -0.004 |
| 114 | 0.007  | 0.120  | 0.000 | 0.127  |
| 115 | 0.001  | 0.010  | 0.000 | 0.011  |
| 116 | 0.000  | 0.001  | 0.000 | 0.002  |
| 117 | -0.001 | -0.010 | 0.000 | -0.011 |
| 118 | -0.003 | -0.026 | 0.000 | -0.029 |
| 119 | -0.000 | -0.002 | 0.000 | -0.002 |
| 120 | -0.000 | -0.002 | 0.000 | -0.002 |
| 121 | 0.007  | 0.115  | 0.000 | 0.122  |
| 122 | 0.001  | 0.010  | 0.000 | 0.010  |
| 123 | 0.000  | 0.003  | 0.000 | 0.003  |
| 124 | -0.001 | -0.010 | 0.000 | -0.011 |
| 125 | -0.003 | -0.024 | 0.000 | -0.027 |
| 126 | -0.000 | -0.002 | 0.000 | -0.002 |
| 127 | -0.000 | 0.001  | 0.000 | 0.001  |
| 128 | 0.006  | 0.105  | 0.000 | 0.111  |
| 129 | 0.001  | 0.009  | 0.000 | 0.010  |
| 130 | 0.000  | 0.004  | 0.000 | 0.004  |

|       |        |        |        |        |
|-------|--------|--------|--------|--------|
| 131   | -0.001 | -0.009 | 0.000  | -0.010 |
| 132   | -0.003 | -0.024 | 0.000  | -0.027 |
| 133   | -0.000 | -0.002 | 0.000  | -0.002 |
| 134   | -0.000 | -0.002 | 0.000  | -0.002 |
| 135   | 0.006  | 0.097  | 0.000  | 0.102  |
| 136   | 0.001  | 0.009  | 0.000  | 0.010  |
| 137   | 0.000  | 0.004  | 0.000  | 0.005  |
| 138   | -0.001 | -0.010 | 0.000  | -0.011 |
| 139   | -0.003 | -0.026 | 0.000  | -0.029 |
| 140   | -0.000 | -0.002 | 0.000  | -0.002 |
| 141   | -0.000 | -0.003 | 0.000  | -0.004 |
| 142   | 0.006  | 0.105  | 0.000  | 0.111  |
| 143   | 0.001  | 0.010  | 0.000  | 0.010  |
| 144   | 0.000  | 0.002  | 0.000  | 0.003  |
| 145   | 0.000  | 0.005  | 0.000  | 0.006  |
| 146   | -0.000 | 0.000  | -0.000 | 0.000  |
| 147   | 0.000  | 0.004  | 0.000  | 0.004  |
| ----- |        |        |        |        |
| tot   | 0.001  | 0.513  | -0.000 | 0.514  |

CHARGE:   cpu time     0.5235: real time     0.5252

FORLOC:   cpu time     0.0200: real time     0.0201

FORNL : cpu time 2.0384: real time 2.0448  
 STRESS: cpu time 6.0970: real time 6.1160  
 FORCOR: cpu time 0.1398: real time 0.1402  
 FORHAR: cpu time 0.0333: real time 0.0333  
 MIXING: cpu time 0.0111: real time 0.0112  
 OFIELD: cpu time 0.0001: real time 0.0001

-----

DFTD3 V3.0 Rev 1

Edisp (eV) -6.61770

E6 (eV): -3.9313

E8 (eV): -2.6864

% E8 : 40.59

FORVDW: cpu time 1.7972: real time 1.8472

FORCE on cell =-STRESS in cart. coord. units (eV):

|           |    |    |    |    |    |    |
|-----------|----|----|----|----|----|----|
| Direction | XX | YY | ZZ | XY | YZ | ZX |
|-----------|----|----|----|----|----|----|

-----

Alpha Z 233.50077 233.50077 233.50077

Ewald 107584.52914 23479.74489-39732.34816 9.13457 3452.92080 128.52653

|                     |              |              |                 |          |             |            |
|---------------------|--------------|--------------|-----------------|----------|-------------|------------|
| Hartree             | 106100.37983 | 25036.38731  | -23799.03742    | -6.90535 | 2946.17447  | 93.24988   |
| E(xc)               | -1914.21384  | -1916.57416  | -1979.87604     | 0.12990  | 1.82079     | 0.13116    |
| Local               | *****        | -53965.01629 | 57025.20455     | 1.05127  | -6357.24027 | -218.37047 |
| n-local             | -472.61689   | -482.35104   | -439.55293      | -0.66624 | -0.65189    | -0.31204   |
| augment             | -38.30400    | -38.57162    | -34.33035       | 0.01319  | -0.98585    | -0.00019   |
| Kinetic             | 7634.96845   | 7638.89241   | 8713.84728      | -3.06602 | -41.67713   | -3.21174   |
| Fock                | 0.00000      | 0.00000      | 0.00000         | 0.00000  | 0.00000     | 0.00000    |
| vdW                 | -2.64076     | -1.49092     | -6.59328        | 0.00117  | -0.07441    | 0.01175    |
| -----               |              |              |                 |          |             |            |
| Total               | -17.73860    | -15.47866    | -19.18559       | -0.30749 | 0.28651     | 0.02489    |
| in kB               | -4.89152     | -4.26833     | -5.29053        | -0.08479 | 0.07901     | 0.00686    |
| external pressure = |              | -4.82 kB     | Pullay stress = |          | 0.00 kB     |            |

VOLUME and BASIS-vectors are now :

-----

energy-cutoff : 400.00

volume of cell : 5810.14

| direct lattice vectors |              |              | reciprocal lattice vectors |             |             |
|------------------------|--------------|--------------|----------------------------|-------------|-------------|
| 14.780600000           | 0.000000000  | 0.000000000  | 0.067656252                | 0.000000000 | 0.000000000 |
| 0.000000000            | 21.333900000 | 0.000000000  | 0.000000000                | 0.046873755 | 0.000000000 |
| 0.000000000            | 0.000000000  | 18.425700000 | 0.000000000                | 0.000000000 | 0.054272022 |

length of vectors

14.780600000 21.333900000 18.425700000 0.067656252 0.046873755 0.054272022

FORCES acting on ions

electron-ion (+dipol)

ewald-force

non-local-force

convergence-correction

-----

|           |           |           |           |           |           |           |           |   |
|-----------|-----------|-----------|-----------|-----------|-----------|-----------|-----------|---|
| 0.453E-02 | 0.154E+03 | 0.361E+02 | -.303E-02 | -.160E+03 | -.357E+02 | -.180E-02 | 0.566E+01 | - |
| .438E+00  | -.161E-06 | -.456E-06 | -.498E-06 |           |           |           |           |   |
| -.186E-01 | 0.155E+03 | -.340E+02 | 0.162E-01 | -.160E+03 | 0.335E+02 | 0.116E-02 | 0.565E+01 |   |
| 0.541E+00 | 0.299E-06 | 0.204E-06 | 0.191E-06 |           |           |           |           |   |
| 0.184E+00 | 0.154E+03 | 0.360E+02 | -.184E+00 | -.160E+03 | -.356E+02 | 0.713E-05 | 0.565E+01 | - |
| .443E+00  | 0.169E-06 | -.492E-06 | -.334E-06 |           |           |           |           |   |
| 0.112E+00 | 0.155E+03 | -.341E+02 | -.988E-01 | -.160E+03 | 0.336E+02 | -.175E-01 | 0.565E+01 |   |
| 0.535E+00 | 0.785E-07 | 0.631E-07 | 0.385E-06 |           |           |           |           |   |
| 0.172E+00 | 0.154E+03 | 0.362E+02 | -.173E+00 | -.160E+03 | -.357E+02 | 0.116E-02 | 0.566E+01 | - |
| .440E+00  | 0.324E-06 | -.617E-06 | -.495E-06 |           |           |           |           |   |
| 0.126E+00 | 0.154E+03 | -.340E+02 | -.108E+00 | -.160E+03 | 0.334E+02 | -.211E-01 | 0.565E+01 |   |
| 0.541E+00 | -.234E-06 | -.105E-06 | -.109E-06 |           |           |           |           |   |
| -.192E-01 | 0.154E+03 | 0.363E+02 | 0.180E-01 | -.160E+03 | -.359E+02 | 0.159E-02 | 0.566E+01 | - |

.431E+00 0.195E-06 -.713E-06 -.822E-06  
-.128E-01 0.154E+03 -.338E+02 0.197E-01 -.160E+03 0.332E+02 -.721E-02 0.565E+01  
0.555E+00 -.277E-06 -.159E-06 -.817E-06  
-.182E+00 0.154E+03 0.363E+02 0.182E+00 -.160E+03 -.359E+02 0.256E-03 0.566E+01 -  
.429E+00 -.166E-06 -.692E-06 -.969E-06  
-.128E+00 0.155E+03 -.337E+02 0.115E+00 -.160E+03 0.331E+02 0.109E-01 0.565E+01  
0.561E+00 -.556E-07 -.143E-07 -.102E-05  
-.174E+00 0.154E+03 0.362E+02 0.176E+00 -.160E+03 -.358E+02 -.176E-02 0.566E+01 -  
.432E+00 -.361E-06 -.550E-06 -.801E-06  
-.115E+00 0.155E+03 -.338E+02 0.959E-01 -.160E+03 0.332E+02 0.192E-01 0.565E+01  
0.555E+00 0.190E-06 0.172E-06 -.514E-06  
0.228E+01 -.150E+03 -.387E+02 -.227E+01 0.156E+03 0.386E+02 -.103E-01 -.566E+01  
0.766E-01 -.344E-06 0.928E-06 -.685E-07  
-.419E+00 -.151E+03 0.388E+02 0.420E+00 0.157E+03 -.386E+02 -.128E-02 -.567E+01 -  
.269E+00 0.218E-06 0.689E-06 0.951E-07  
0.136E+02 -.146E+03 -.413E+02 -.138E+02 0.151E+03 0.413E+02 0.257E+00 -.567E+01 -  
.348E-01 0.703E-07 0.550E-06 -.917E-08  
0.162E+01 -.151E+03 0.402E+02 -.162E+01 0.156E+03 -.400E+02 -.101E-02 -.567E+01 -  
.229E+00 -.238E-06 0.477E-06 -.572E-06  
0.353E+01 -.149E+03 0.443E+02 -.352E+01 0.155E+03 -.441E+02 -.204E-02 -.567E+01 -  
.180E+00 -.440E-06 0.345E-06 -.267E-06  
-.149E+02 -.146E+03 -.330E+02 0.150E+02 0.151E+03 0.330E+02 -.958E-01 -.566E+01

0.469E-01 - .996E-06 0.517E-06 -.430E-07  
-.297E+01 -.149E+03 0.432E+02 0.296E+01 0.155E+03 -.430E+02 0.115E-01 -.567E+01 -  
.241E+00 0.196E-06 0.494E-06 0.124E-05  
-.380E+01 -.150E+03 -.385E+02 0.380E+01 0.156E+03 0.385E+02 -.609E-02 -.566E+01  
0.238E-01 -.132E-06 0.884E-06 -.319E-06  
-.208E+01 -.151E+03 0.395E+02 0.208E+01 0.156E+03 -.392E+02 0.149E-02 -.566E+01 -  
.282E+00 0.476E-06 0.668E-06 0.927E-06  
0.820E-02 -.148E+03 0.486E+02 -.675E-03 0.154E+03 -.484E+02 -.548E-02 -.570E+01 -  
.158E+00 -.267E-06 0.404E-06 0.767E-06  
0.196E+02 -.103E+03 0.222E+02 -.212E+02 0.103E+03 -.246E+02 0.153E+01 0.138E+00  
0.238E+01 0.497E-06 0.628E-06 -.301E-06  
-.191E+02 -.103E+03 0.154E+02 0.215E+02 0.103E+03 -.169E+02 -.241E+01 -.120E+00  
0.152E+01 0.656E-06 0.495E-06 0.608E-06  
0.710E-01 0.461E+03 0.202E+03 -.743E-01 -.462E+03 -.201E+03 0.384E-02 0.102E+01 -  
.219E+00 -.643E-06 -.313E-06 -.123E-05  
0.212E+00 0.353E+03 -.234E+03 -.212E+00 -.353E+03 0.234E+03 0.260E-02 0.443E+00 -  
.371E-01 0.456E-06 0.731E-07 0.230E-05  
-.254E-01 0.351E+03 0.240E+03 0.240E-01 -.351E+03 -.241E+03 0.316E-02 0.408E+00  
0.565E-01 -.984E-06 -.786E-08 -.161E-05  
-.173E+00 0.462E+03 -.195E+03 0.180E+00 -.463E+03 0.195E+03 -.662E-02 0.105E+01  
0.233E+00 0.105E-05 0.133E-05 0.157E-05  
-.623E-01 0.210E+03 -.272E+03 0.663E-01 -.210E+03 0.272E+03 -.446E-02 0.942E-01

0.560E-01 0.278E-06 -.110E-05 0.168E-05  
0.562E+00 0.461E+03 0.202E+03 -.565E+00 -.462E+03 -.201E+03 0.201E-02 0.102E+01 -  
.214E+00 0.529E-06 -.421E-06 -.639E-06  
0.106E+01 0.352E+03 -.234E+03 -.107E+01 -.353E+03 0.234E+03 0.160E-01 0.449E+00 -  
.425E-01 -.500E-06 -.579E-07 0.151E-05  
0.413E+00 0.351E+03 0.240E+03 -.415E+00 -.351E+03 -.240E+03 0.303E-02 0.408E+00  
0.493E-01 -.815E-07 0.126E-06 -.495E-06  
0.578E+00 0.462E+03 -.195E+03 -.584E+00 -.463E+03 0.195E+03 0.480E-02 0.105E+01  
0.235E+00 0.217E-07 0.646E-06 0.221E-05  
0.690E+00 0.210E+03 -.272E+03 -.695E+00 -.210E+03 0.272E+03 0.609E-02 0.919E-01  
0.617E-01 -.397E-06 -.848E-06 0.113E-05  
0.426E+00 0.461E+03 0.202E+03 -.429E+00 -.462E+03 -.202E+03 0.383E-02 0.102E+01 -  
.213E+00 0.111E-05 -.879E-06 -.157E-05  
0.939E+00 0.352E+03 -.233E+03 -.955E+00 -.352E+03 0.233E+03 0.151E-01 0.442E+00 -  
.377E-01 -.116E-05 0.579E-06 -.787E-06  
0.479E+00 0.351E+03 0.241E+03 -.481E+00 -.351E+03 -.241E+03 0.249E-02 0.406E+00  
0.513E-01 0.834E-06 -.147E-06 -.714E-06  
0.705E+00 0.462E+03 -.194E+03 -.716E+00 -.463E+03 0.194E+03 0.784E-02 0.106E+01  
0.242E+00 -.112E-05 0.733E-06 0.235E-06  
0.725E+00 0.210E+03 -.271E+03 -.734E+00 -.210E+03 0.271E+03 0.655E-02 0.918E-01  
0.592E-01 -.671E-06 0.130E-06 -.222E-06  
-.181E+00 0.461E+03 0.202E+03 0.178E+00 -.462E+03 -.202E+03 0.448E-02 0.102E+01 -

.218E+00 0.731E-06 -.130E-05 -.308E-05  
-.294E+00 0.352E+03 -.233E+03 0.298E+00 -.352E+03 0.233E+03 -.212E-02 0.441E+00 -  
.300E-01 -.323E-06 0.158E-05 -.231E-05  
0.409E-01 0.351E+03 0.241E+03 -.399E-01 -.351E+03 -.241E+03 0.222E-02 0.410E+00  
0.559E-01 0.965E-06 -.566E-06 -.208E-05  
0.504E-01 0.462E+03 -.194E+03 -.565E-01 -.463E+03 0.194E+03 0.394E-02 0.106E+01  
0.232E+00 -.809E-06 0.148E-05 -.231E-05  
-.477E-01 0.210E+03 -.271E+03 0.457E-01 -.210E+03 0.271E+03 -.272E-03 0.940E-01  
0.323E-01 -.354E-07 0.800E-06 -.107E-05  
-.552E+00 0.461E+03 0.202E+03 0.550E+00 -.462E+03 -.202E+03 0.768E-03 0.102E+01 -  
.220E+00 -.493E-06 -.124E-05 -.361E-05  
-.119E+01 0.352E+03 -.233E+03 0.120E+01 -.353E+03 0.233E+03 -.162E-01 0.448E+00 -  
.331E-01 0.606E-06 0.140E-05 -.174E-05  
-.352E+00 0.351E+03 0.241E+03 0.349E+00 -.351E+03 -.241E+03 0.206E-02 0.414E+00  
0.625E-01 0.140E-06 -.768E-06 -.317E-05  
-.412E+00 0.462E+03 -.194E+03 0.426E+00 -.463E+03 0.194E+03 -.115E-01 0.106E+01  
0.230E+00 0.219E-07 0.217E-05 -.299E-05  
-.561E+00 0.210E+03 -.271E+03 0.566E+00 -.210E+03 0.271E+03 -.943E-02 0.922E-01  
0.525E-01 0.261E-06 0.661E-06 -.679E-06  
-.475E+00 0.461E+03 0.202E+03 0.475E+00 -.462E+03 -.202E+03 0.308E-02 0.102E+01 -  
.220E+00 -.125E-05 -.710E-06 -.265E-05  
-.806E+00 0.353E+03 -.234E+03 0.820E+00 -.353E+03 0.234E+03 -.149E-01 0.448E+00 -

.393E-01 0.873E-06 0.683E-06 0.579E-06  
-.374E+00 0.351E+03 0.241E+03 0.369E+00 -.351E+03 -.241E+03 0.975E-03 0.411E+00  
0.627E-01 -.872E-06 -.472E-06 -.292E-05  
-.595E+00 0.462E+03 -.194E+03 0.608E+00 -.463E+03 0.194E+03 -.170E-01 0.105E+01  
0.234E+00 0.907E-06 0.205E-05 -.110E-05  
-.588E+00 0.210E+03 -.272E+03 0.599E+00 -.210E+03 0.272E+03 -.102E-01 0.999E-01  
0.567E-01 0.566E-06 -.334E-06 0.698E-06  
-.960E-02 0.206E+03 0.279E+03 0.130E-01 -.206E+03 -.279E+03 -.361E-02 0.689E-01 -  
.410E-01 -.722E-06 0.308E-06 -.124E-05  
0.667E+00 0.303E+02 0.296E+03 -.662E+00 -.302E+02 -.296E+03 -.469E-02 -.408E-01  
0.770E-02 -.937E-07 0.502E-06 -.129E-05  
-.846E+00 0.144E+03 -.282E+03 0.848E+00 -.144E+03 0.282E+03 -.317E-02 0.137E+00  
0.286E-01 0.346E-06 -.106E-05 0.102E-05  
0.534E+00 -.215E+02 -.285E+03 -.534E+00 0.214E+02 0.285E+03 -.779E-03 0.392E-01  
0.185E-01 0.334E-07 -.125E-05 -.240E-06  
0.496E+00 -.294E+02 0.293E+03 -.493E+00 0.294E+02 -.293E+03 -.555E-02 0.256E-01 -  
.301E-01 0.259E-06 0.102E-06 -.106E-05  
0.524E+00 0.139E+03 0.289E+03 -.524E+00 -.139E+03 -.289E+03 0.179E-02 0.104E+00 -  
.247E-01 -.428E-06 0.680E-06 -.913E-06  
-.127E+01 0.364E+02 -.287E+03 0.127E+01 -.364E+02 0.287E+03 -.405E-04 -.696E-02  
0.137E-01 -.219E-06 -.112E-05 0.152E-06  
0.167E+01 -.130E+03 -.271E+03 -.169E+01 0.130E+03 0.271E+03 0.107E-01 -.876E-01

0.371E-01 - .133E-06 -.790E-06 -.658E-06  
0.397E+00 0.207E+03 0.280E+03 -.395E+00 -.207E+03 -.280E+03 0.706E-03 0.698E-01 -  
.369E-01 -.173E-06 0.664E-06 -.496E-06  
0.921E+00 0.312E+02 0.296E+03 -.924E+00 -.311E+02 -.296E+03 0.225E-02 -.408E-01  
0.124E-01 -.112E-06 0.606E-06 -.109E-05  
0.133E+01 0.144E+03 -.282E+03 -.133E+01 -.144E+03 0.282E+03 0.504E-02 0.127E+00  
0.279E-01 0.511E-07 -.133E-05 0.115E-05  
0.342E+01 -.199E+02 -.285E+03 -.343E+01 0.199E+02 0.285E+03 0.136E-01 0.420E-01  
0.134E-01 0.464E-06 -.105E-05 0.189E-07  
0.139E+01 -.287E+02 0.294E+03 -.139E+01 0.287E+02 -.294E+03 -.349E-02 0.254E-01 -  
.305E-01 -.626E-07 0.680E-06 -.164E-05  
0.678E+00 0.139E+03 0.290E+03 -.679E+00 -.139E+03 -.290E+03 0.612E-03 0.103E+00 -  
.294E-01 0.165E-06 0.751E-06 -.536E-06  
0.160E+01 0.367E+02 -.287E+03 -.159E+01 -.367E+02 0.287E+03 -.128E-01 -.199E-01  
0.127E-01 0.358E-06 -.129E-05 0.144E-06  
0.612E+01 -.125E+03 -.271E+03 -.614E+01 0.125E+03 0.271E+03 0.222E-01 -.888E-01  
0.146E-01 0.399E-06 -.101E-05 -.155E-06  
0.368E+00 0.207E+03 0.280E+03 -.373E+00 -.207E+03 -.280E+03 0.104E-03 0.687E-01 -  
.364E-01 0.580E-06 0.301E-06 -.553E-06  
-.353E-01 0.319E+02 0.296E+03 0.266E-01 -.319E+02 -.296E+03 0.106E-01 -.360E-01  
0.141E-01 -.327E-07 -.294E-06 -.401E-06  
0.210E+01 0.144E+03 -.281E+03 -.211E+01 -.144E+03 0.281E+03 0.121E-01 0.121E+00

0.238E-01    -.355E-06 -.447E-06 0.420E-06  
              0.303E+01 -.172E+02 -.283E+03    -.306E+01 0.171E+02 0.283E+03    0.249E-01 0.890E-01

0.599E-01    0.628E-06 -.112E-06 0.488E-06  
              0.106E+01 -.272E+02 0.294E+03    -.106E+01 0.272E+02 -.294E+03    0.289E-02 0.245E-01 -

.374E-01    -.406E-06 0.170E-06 -.857E-06  
              0.977E-01 0.140E+03 0.290E+03    -.992E-01 -.140E+03 -.290E+03    0.130E-02 0.107E+00 -

.230E-01    0.553E-06 0.153E-07 -.740E-06  
              0.277E+01 0.387E+02 -.286E+03    -.277E+01 -.387E+02 0.286E+03    0.157E-02 -.994E-02

0.288E-01    -.875E-07 -.795E-06 0.283E-06  
              0.596E+01 -.115E+03 -.267E+03    -.612E+01 0.115E+03 0.267E+03    0.156E+00 0.446E-02

0.129E+00    0.441E-06 -.136E-05 0.477E-06  
              -.242E+00 0.207E+03 0.280E+03    0.239E+00 -.207E+03 -.280E+03    0.439E-02 0.719E-01 -

.385E-01    0.696E-06 -.402E-06 -.134E-05  
              -.114E+01 0.314E+02 0.294E+03    0.113E+01 -.314E+02 -.294E+03    0.921E-02 -.309E-01

0.565E-02    0.102E-06 -.117E-05 0.762E-07  
              0.595E+00 0.144E+03 -.281E+03    -.612E+00 -.144E+03 0.281E+03    0.178E-01 0.127E+00

0.438E-01    0.316E-07 0.522E-06 -.359E-06  
              -.939E+00 -.159E+02 -.286E+03    0.931E+00 0.158E+02 0.286E+03    0.587E-02 0.929E-01

0.798E-01    0.316E-06 0.201E-06 0.656E-06  
              -.640E+00 -.265E+02 0.293E+03    0.636E+00 0.265E+02 -.293E+03    0.494E-02 0.236E-01 -

.268E-01    -.254E-06 -.901E-06 0.340E-06  
              -.534E+00 0.139E+03 0.289E+03    0.529E+00 -.139E+03 -.289E+03    0.656E-02 0.114E+00 -

.212E-01 0.431E-06 -.717E-06 -.120E-05  
0.779E+00 0.408E+02 -.287E+03 -.791E+00 -.408E+02 0.287E+03 0.514E-02 0.296E-02 -

.191E-01 0.354E-06 0.124E-06 0.372E-06  
-.459E+00 -.113E+03 -.276E+03 0.425E+00 0.113E+03 0.277E+03 0.348E-01 0.629E-01 -

.268E+00 0.437E-06 0.631E-06 0.713E-06  
-.572E+00 0.206E+03 0.279E+03 0.570E+00 -.206E+03 -.279E+03 0.115E-02 0.724E-01 -

.454E-01 0.223E-06 -.772E-06 -.205E-05  
-.785E+00 0.304E+02 0.294E+03 0.788E+00 -.304E+02 -.294E+03 -.756E-02 -.306E-01 -

.118E-02 0.129E-06 -.127E-05 -.886E-07  
-.123E+01 0.144E+03 -.281E+03 0.125E+01 -.145E+03 0.281E+03 -.158E-01 0.123E+00

0.504E-01 -.154E-06 0.875E-06 -.546E-06  
-.366E+01 -.174E+02 -.283E+03 0.369E+01 0.173E+02 0.283E+03 -.313E-01 0.118E+00

0.578E-01 -.902E-06 0.193E-06 0.391E-06  
-.130E+01 -.277E+02 0.291E+03 0.129E+01 0.277E+02 -.291E+03 -.131E-02 0.343E-01 -

.217E-01 0.135E-06 -.143E-05 0.864E-06  
-.348E+00 0.139E+03 0.289E+03 0.347E+00 -.139E+03 -.289E+03 0.661E-05 0.112E+00 -

.145E-01 -.114E-06 -.785E-06 -.151E-05  
-.830E+00 0.400E+02 -.287E+03 0.822E+00 -.400E+02 0.287E+03 0.125E-01 -.664E-02 -

.183E-01 -.233E-06 0.340E-06 0.249E-06  
-.786E+01 -.119E+03 -.267E+03 0.806E+01 0.119E+03 0.267E+03 -.193E+00 0.627E-02

0.339E-01 -.689E-06 -.109E-05 0.318E-06  
-.410E+00 0.206E+03 0.279E+03 0.411E+00 -.206E+03 -.279E+03 -.280E-02 0.718E-01 -

.463E-01    -.621E-06 -.413E-06 -.199E-05  
              -.658E-01 0.300E+02 0.294E+03    0.756E-01 -.299E+02 -.294E+03    -.950E-02 -.345E-01  
0.141E-02    0.176E-08 -.439E-06 -.756E-06  
              -.206E+01 0.145E+03 -.282E+03    0.208E+01 -.145E+03 0.282E+03    -.190E-01 0.133E+00  
0.255E-01    0.830E-07 0.284E-07 0.142E-06  
              -.257E+01 -.208E+02 -.285E+03    0.259E+01 0.208E+02 0.285E+03    -.291E-01 0.414E-01  
0.316E-01    -.519E-06 -.846E-06 0.450E-08  
              -.556E+00 -.290E+02 0.291E+03    0.561E+00 0.290E+02 -.291E+03    -.287E-02 0.294E-01 -  
.248E-01    0.321E-06 -.984E-06 0.200E-06  
              0.577E-01 0.139E+03 0.289E+03    -.578E-01 -.139E+03 -.289E+03    -.343E-03 0.109E+00 -  
.207E-01    -.595E-06 -.493E-07 -.137E-05  
              -.290E+01 0.378E+02 -.286E+03    0.291E+01 -.378E+02 0.286E+03    -.151E-01 -.277E-02  
0.206E-01    -.197E-06 -.408E-06 0.233E-06  
              -.514E+01 -.128E+03 -.271E+03    0.519E+01 0.128E+03 0.271E+03    -.466E-01 -.858E-01  
0.375E-01    -.475E-06 -.668E-06 -.207E-06  
              0.394E+00 -.137E+03 0.280E+03    -.386E+00 0.137E+03 -.280E+03    -.972E-02 -.127E+00 -  
.154E-01    0.767E-06 -.117E-06 -.905E-06  
              0.193E+01 -.343E+03 0.233E+03    -.194E+01 0.344E+03 -.233E+03    0.913E-02 -.460E+00 -  
.543E-01    0.478E-06 0.111E-05 -.183E-05  
              -.253E+01 -.197E+03 -.259E+03    0.254E+01 0.197E+03 0.259E+03    -.963E-02 -.197E+00  
0.367E-01    -.668E-06 -.563E-06 -.580E-06  
              0.691E+01 -.447E+03 -.198E+03    -.693E+01 0.448E+03 0.198E+03    0.985E-02 -.112E+01

0.872E-01 - .926E-06 0.121E-05 -.326E-06  
-.476E+00 -.451E+03 0.204E+03 0.477E+00 0.452E+03 -.204E+03 -.207E-02 -.108E+01 -  
.112E+00 0.107E-05 0.216E-05 -.974E-07  
0.171E+01 -.203E+03 0.269E+03 -.170E+01 0.203E+03 -.269E+03 -.481E-02 -.925E-01 -  
.317E-01 0.458E-06 0.206E-06 -.188E-05  
-.211E+01 -.338E+03 -.222E+03 0.216E+01 0.338E+03 0.222E+03 -.444E-01 -.603E+00  
0.535E-01 -.995E-06 -.178E-07 -.454E-06  
0.218E+01 -.136E+03 0.282E+03 -.218E+01 0.136E+03 -.282E+03 -.638E-02 -.126E+00 -  
.917E-02 -.993E-07 0.254E-06 -.220E-05  
0.672E+01 -.339E+03 0.238E+03 -.671E+01 0.340E+03 -.238E+03 -.128E-01 -.461E+00 -  
.456E-01 -.987E-06 0.630E-06 -.231E-05  
0.679E+01 -.193E+03 -.259E+03 -.680E+01 0.193E+03 0.258E+03 0.114E-01 -.145E+00  
0.633E-01 0.494E-06 -.107E-05 -.542E-06  
0.313E+02 -.427E+03 -.198E+03 -.313E+02 0.428E+03 0.197E+03 0.734E-01 -.972E+00  
0.136E+00 0.499E-06 0.360E-06 -.136E-06  
0.544E+01 -.449E+03 0.209E+03 -.544E+01 0.450E+03 -.209E+03 0.549E-03 -.108E+01 -  
.795E-01 -.542E-06 0.169E-05 -.253E-05  
0.369E+01 -.201E+03 0.272E+03 -.369E+01 0.201E+03 -.272E+03 -.758E-03 -.975E-01 -  
.303E-01 -.688E-06 0.471E-07 -.206E-05  
0.124E+02 -.332E+03 -.223E+03 -.125E+02 0.332E+03 0.223E+03 0.121E+00 -.534E+00  
0.312E-01 0.383E-06 -.679E-06 -.275E-06  
0.219E+01 -.133E+03 0.283E+03 -.220E+01 0.133E+03 -.283E+03 0.543E-03 -.128E+00 -

.417E-02    -.865E-06 -.193E-06 -.103E-05  
0.494E+01 -.332E+03 0.245E+03    -.491E+01 0.332E+03 -.245E+03    -.319E-01 -.476E+00 -  
.372E-01    -.142E-05 0.383E-07 0.660E-06  
0.112E+02 -.182E+03 -.258E+03    -.113E+02 0.182E+03 0.258E+03    0.481E-01 -.984E-01 -  
.104E+00    0.688E-06 -.156E-05 0.101E-06  
0.319E+02 -.399E+03 -.175E+03    -.322E+02 0.401E+03 0.174E+03    0.307E+00 -.143E+01  
0.131E+01    0.332E-05 0.338E-05 0.587E-06  
0.931E+01 -.443E+03 0.219E+03    -.931E+01 0.444E+03 -.219E+03    -.576E-02 -.110E+01 -  
.483E-01    -.160E-05 0.751E-06 -.114E-05  
0.170E+01 -.196E+03 0.273E+03    -.171E+01 0.197E+03 -.273E+03    0.553E-02 -.109E+00 -  
.508E-01    -.126E-05 -.628E-06 0.282E-06  
0.172E+02 -.310E+03 -.216E+03    -.175E+02 0.310E+03 0.216E+03    0.328E+00 -.218E+00  
0.122E+00    0.797E-06 0.435E-07 -.134E-06  
-.103E+01 -.132E+03 0.281E+03    0.102E+01 0.132E+03 -.281E+03    0.104E-01 -.127E+00  
0.458E-03    -.793E-06 -.115E-05 0.125E-05  
-.511E+01 -.331E+03 0.239E+03    0.510E+01 0.332E+03 -.239E+03    0.904E-02 -.494E+00 -  
.412E-01    -.320E-06 -.528E-07 0.395E-05  
0.160E+01 -.170E+03 -.261E+03    -.172E+01 0.169E+03 0.261E+03    0.121E+00 0.383E+00 -  
.836E-01    0.266E-05 -.264E-06 0.516E-06  
-.644E+01 -.299E+03 -.189E+03    0.594E+01 0.294E+03 0.185E+03    0.481E+00 0.503E+01  
0.370E+01    0.969E-06 0.937E-05 0.382E-05  
-.600E+00 -.436E+03 0.227E+03    0.597E+00 0.437E+03 -.227E+03    0.191E-02 -.120E+01 -

.477E-01    -.125E-05 0.410E-06 0.284E-05  
              -.302E+01 -.197E+03 0.268E+03    0.300E+01 0.197E+03 -.268E+03    0.147E-01 -.111E+00 -  
.424E-01    -.345E-06 -.128E-05 0.279E-05  
              0.345E+01 -.280E+03 -.215E+03    -.540E+01 0.280E+03 0.214E+03    0.193E+01 0.646E+00  
0.820E+00    0.621E-05 0.429E-05 0.102E-05  
              -.274E+01 -.134E+03 0.277E+03    0.274E+01 0.134E+03 -.277E+03    0.249E-02 -.123E+00 -  
.181E-01    0.139E-06 -.145E-05 0.251E-05  
              -.602E+01 -.338E+03 0.230E+03    0.602E+01 0.339E+03 -.230E+03    0.111E-01 -.494E+00 -  
.453E-01    0.829E-06 0.360E-06 0.423E-05  
              -.652E+01 -.171E+03 -.257E+03    0.660E+01 0.170E+03 0.257E+03    -.813E-01 0.495E+00  
0.278E-01    -.217E-05 0.248E-06 0.368E-06  
              -.443E+02 -.422E+03 -.184E+03    0.449E+02 0.423E+03 0.183E+03    -.570E+00 -.111E+01  
0.615E+00    -.312E-05 0.402E-05 -.284E-06  
              -.867E+01 -.441E+03 0.211E+03    0.866E+01 0.442E+03 -.211E+03    0.144E-01 -.111E+01 -  
.742E-01    0.487E-06 0.638E-06 0.488E-05  
              -.294E+01 -.201E+03 0.265E+03    0.294E+01 0.201E+03 -.265E+03    -.921E-02 -.110E+00 -  
.200E-01    0.603E-06 -.110E-05 0.297E-05  
              -.146E+02 -.290E+03 -.209E+03    0.166E+02 0.289E+03 0.209E+03    -.199E+01 0.610E+00  
0.782E+00    -.525E-05 0.453E-05 0.607E-06  
              -.139E+01 -.136E+03 0.277E+03    0.140E+01 0.136E+03 -.277E+03    -.103E-01 -.125E+00 -  
.236E-01    0.820E-06 -.102E-05 0.140E-05  
              -.281E+01 -.343E+03 0.230E+03    0.278E+01 0.343E+03 -.230E+03    0.234E-01 -.473E+00 -

.588E-01 0.128E-05 0.101E-05 0.142E-05  
 -.104E+02 -.189E+03 -.258E+03 0.105E+02 0.189E+03 0.258E+03 -.780E-01 -.139E+00 -  
 .527E-01 -.978E-06 -.115E-05 -.156E-06  
 -.150E+02 -.446E+03 -.196E+03 0.150E+02 0.447E+03 0.196E+03 -.700E-01 -.113E+01  
 0.101E+00 -.564E-06 0.178E-05 -.791E-06  
 -.552E+01 -.448E+03 0.204E+03 0.552E+01 0.449E+03 -.204E+03 -.501E-02 -.109E+01 -  
 .124E+00 0.167E-05 0.163E-05 0.348E-05  
 -.922E+00 -.203E+03 0.267E+03 0.930E+00 0.203E+03 -.267E+03 -.914E-02 -.102E+00 -  
 .314E-01 0.116E-05 -.356E-06 0.595E-06  
 -.163E+02 -.329E+03 -.218E+03 0.167E+02 0.329E+03 0.218E+03 -.362E+00 -.480E+00  
 0.433E-01 -.123E-05 0.114E-05 -.860E-06  
 -.405E+01 -.263E+03 -.192E+03 0.316E+01 0.256E+03 0.188E+03 0.968E+00 0.773E+01  
 0.509E+01 0.584E-08 0.310E-05 0.343E-06  
 0.532E+02 -.518E+03 -.137E+03 -.543E+02 0.522E+03 0.141E+03 0.106E+01 -.396E+01 -  
 .382E+01 0.483E-05 0.256E-05 0.369E-06  
 -.462E+02 -.582E+03 -.447E+03 0.519E+02 0.632E+03 0.481E+03 -.576E+01 -.501E+02 -  
 .346E+02 -.300E-05 -.172E-04 -.132E-04  
 -----  
 0.425E+01 0.269E+02 0.228E+02 -.320E-12 -.591E-11 0.114E-11 -.430E+01 -.269E+02 -  
 .228E+02 0.123E-05 0.957E-05 -.361E-04

## POSITION

## TOTAL-FORCE (eV/Angst)

-----

|          |          |         |           |           |           |
|----------|----------|---------|-----------|-----------|-----------|
| 1.24575  | 4.02870  | 5.43979 | 0.000042  | 0.001049  | -0.000445 |
| 1.21024  | 4.07581  | 8.43726 | -0.000989 | 0.002667  | -0.001108 |
| 3.70862  | 4.02890  | 5.43965 | 0.000312  | 0.001920  | -0.001132 |
| 3.67998  | 4.07733  | 8.43690 | -0.004028 | -0.000363 | -0.002868 |
| 6.17157  | 4.02854  | 5.43942 | -0.000000 | -0.000107 | -0.001789 |
| 6.14482  | 4.08292  | 8.43295 | -0.002822 | -0.003245 | -0.003154 |
| 8.63513  | 4.02801  | 5.43869 | 0.000784  | -0.000409 | -0.002036 |
| 8.60339  | 4.08732  | 8.43089 | -0.000124 | -0.001121 | -0.002157 |
| 11.09928 | 4.02784  | 5.43885 | 0.000875  | 0.002006  | -0.002744 |
| 11.06021 | 4.08619  | 8.43099 | -0.001745 | 0.000761  | -0.000585 |
| 13.56311 | 4.02807  | 5.43972 | 0.000331  | 0.001653  | -0.001654 |
| 13.52141 | 4.08047  | 8.43349 | 0.000396  | -0.002198 | 0.000337  |
| 2.44241  | 15.48073 | 8.85224 | -0.000629 | -0.005348 | 0.002409  |
| 0.01714  | 15.44624 | 5.32469 | 0.000339  | 0.001522  | -0.001244 |
| 4.86040  | 15.47728 | 8.86623 | 0.001315  | 0.000160  | -0.000193 |
| 2.48016  | 15.44854 | 5.27562 | 0.000369  | -0.001214 | -0.000572 |
| 4.94382  | 15.44925 | 5.24869 | 0.001823  | -0.003067 | 0.000337  |
| 12.31531 | 15.48242 | 9.00211 | -0.004208 | 0.001119  | 0.003381  |
| 9.86772  | 15.44556 | 5.34176 | 0.000428  | -0.001034 | 0.000747  |
| 14.76279 | 15.48245 | 8.89951 | -0.006252 | -0.000631 | 0.005661  |

|          |          |         |           |           |           |
|----------|----------|---------|-----------|-----------|-----------|
| 12.33384 | 15.44510 | 5.36128 | 0.001370  | -0.003208 | -0.001349 |
| 7.40743  | 15.44616 | 5.26463 | 0.002328  | 0.001451  | 0.001363  |
| 6.44846  | 16.34427 | 7.40648 | -0.003594 | -0.002958 | -0.000796 |
| 8.60064  | 16.47644 | 7.89249 | 0.004495  | 0.003036  | 0.004190  |
| 1.24544  | 5.11881  | 5.35500 | 0.000938  | 0.000057  | -0.002429 |
| 2.44348  | 5.83889  | 8.62292 | 0.002425  | -0.004399 | 0.001207  |
| 0.01380  | 5.79530  | 5.28573 | 0.002090  | -0.002379 | 0.000453  |
| 1.21063  | 5.16420  | 8.54151 | 0.000256  | -0.000523 | -0.001960 |
| 2.44351  | 7.27931  | 8.74832 | -0.000081 | -0.001292 | -0.000146 |
| 3.70866  | 5.11896  | 5.35390 | -0.000417 | -0.001728 | 0.000360  |
| 4.90800  | 5.84315  | 8.62123 | -0.001073 | 0.003840  | -0.000739 |
| 2.47701  | 5.79561  | 5.28397 | 0.001455  | -0.000525 | -0.002626 |
| 3.67679  | 5.16572  | 8.54000 | -0.000117 | 0.001638  | -0.000104 |
| 4.90764  | 7.28398  | 8.74777 | 0.000665  | -0.000608 | 0.000986  |
| 6.17184  | 5.11860  | 5.35433 | 0.001483  | 0.000279  | 0.000933  |
| 7.37096  | 5.84929  | 8.62094 | -0.000598 | 0.007143  | -0.002459 |
| 4.94029  | 5.79548  | 5.28340 | 0.000601  | -0.002616 | -0.001193 |
| 6.14080  | 5.17108  | 8.53715 | -0.002521 | 0.002506  | 0.002383  |
| 7.37071  | 7.28983  | 8.75132 | -0.001971 | 0.001588  | 0.000124  |
| 8.63543  | 5.11820  | 5.35521 | 0.001234  | 0.001226  | -0.001031 |
| 9.83233  | 5.85166  | 8.62337 | 0.002803  | 0.000848  | -0.001129 |
| 7.40374  | 5.79498  | 5.28512 | 0.003469  | -0.002610 | -0.001355 |

|          |          |         |           |           |           |
|----------|----------|---------|-----------|-----------|-----------|
| 8.60194  | 5.17528  | 8.53759 | -0.001933 | -0.000474 | -0.000297 |
| 9.83204  | 7.29110  | 8.75719 | -0.001802 | -0.002785 | -0.002475 |
| 11.09930 | 5.11814  | 5.35578 | -0.000863 | -0.003472 | -0.001325 |
| 12.29449 | 5.84673  | 8.62385 | -0.000020 | 0.005800  | -0.002208 |
| 9.86750  | 5.79468  | 5.28678 | -0.000741 | -0.000633 | 0.001536  |
| 11.06261 | 5.17409  | 8.53894 | 0.002722  | 0.002601  | -0.000483 |
| 12.29428 | 7.28729  | 8.75533 | -0.004545 | 0.001153  | -0.001533 |
| 13.56278 | 5.11829  | 5.35605 | 0.002652  | 0.000418  | -0.001944 |
| 14.75895 | 5.83988  | 8.62434 | -0.000248 | -0.002622 | -0.002182 |
| 12.33118 | 5.79480  | 5.28692 | -0.004504 | -0.001387 | 0.002576  |
| 13.52535 | 5.16844  | 8.54022 | -0.003478 | 0.003743  | -0.001514 |
| 14.75917 | 7.28012  | 8.75179 | 0.000992  | 0.002541  | -0.000738 |
| 0.01434  | 7.23830  | 5.19017 | 0.000093  | -0.000213 | 0.000069  |
| 1.24689  | 9.38061  | 5.13160 | 0.000550  | -0.001870 | -0.000008 |
| 1.21085  | 7.98059  | 8.79588 | -0.000944 | -0.000421 | 0.001545  |
| 2.44214  | 10.12243 | 8.87141 | -0.000902 | 0.003790  | -0.005015 |
| 0.01532  | 10.08686 | 5.14049 | -0.002038 | -0.000134 | -0.002412 |
| 1.24606  | 7.94244  | 5.15775 | 0.002005  | -0.002598 | 0.000814  |
| 1.21082  | 9.41592  | 8.85782 | -0.000852 | 0.004210  | 0.000179  |
| 2.44072  | 11.55513 | 8.88414 | -0.006100 | -0.003293 | 0.001630  |
| 2.47747  | 7.23842  | 5.18585 | 0.002796  | 0.002864  | 0.001306  |
| 3.70997  | 9.38055  | 5.12566 | -0.001092 | -0.003019 | 0.000039  |

|         |          |         |           |           |           |
|---------|----------|---------|-----------|-----------|-----------|
| 3.67534 | 7.98360  | 8.79349 | -0.000564 | 0.001132  | 0.000951  |
| 4.90487 | 10.12925 | 8.87518 | 0.000116  | 0.000102  | 0.000108  |
| 2.47867 | 10.08713 | 5.12695 | -0.002262 | 0.001496  | 0.000752  |
| 3.70939 | 7.94242  | 5.15441 | 0.000837  | -0.004008 | -0.001714 |
| 3.67589 | 9.41970  | 8.85445 | -0.001328 | 0.001763  | -0.000165 |
| 4.90263 | 11.56506 | 8.89086 | -0.000897 | 0.000900  | 0.000860  |
| 4.94085 | 7.23830  | 5.18552 | -0.004715 | 0.002244  | 0.000822  |
| 6.17318 | 9.38002  | 5.13173 | 0.002004  | 0.002068  | 0.001829  |
| 6.13864 | 7.99044  | 8.79647 | 0.002532  | -0.000160 | -0.001754 |
| 7.36780 | 10.13760 | 8.89473 | -0.000213 | 0.003379  | 0.000401  |
| 4.94196 | 10.08682 | 5.12700 | 0.004143  | 0.001484  | -0.001170 |
| 6.17284 | 7.94199  | 5.15766 | -0.000040 | 0.000566  | 0.003019  |
| 6.13939 | 9.42660  | 8.86164 | 0.000868  | -0.000400 | -0.002326 |
| 7.36410 | 11.57721 | 8.92935 | -0.002356 | -0.001661 | 0.005213  |
| 7.40426 | 7.23794  | 5.19012 | 0.002143  | 0.001760  | 0.001066  |
| 8.63700 | 9.37970  | 5.14543 | -0.000570 | 0.002931  | 0.000948  |
| 8.60086 | 7.99568  | 8.80617 | 0.001019  | -0.000358 | -0.000927 |
| 9.83068 | 10.14286 | 8.92842 | -0.002209 | 0.003185  | -0.001468 |
| 7.40553 | 10.08627 | 5.14064 | 0.001235  | -0.003565 | 0.003129  |
| 8.63637 | 7.94166  | 5.16555 | 0.002609  | 0.001788  | -0.001421 |
| 8.60077 | 9.43254  | 8.88532 | -0.006121 | 0.002174  | -0.001235 |
| 9.82927 | 11.58244 | 9.00096 | 0.001103  | 0.001549  | -0.000078 |

|          |          |         |           |           |           |
|----------|----------|---------|-----------|-----------|-----------|
| 9.86805  | 7.23787  | 5.19489 | -0.000369 | 0.000095  | -0.000212 |
| 11.10106 | 9.37979  | 5.15156 | -0.003811 | -0.001043 | 0.000658  |
| 11.06331 | 7.99411  | 8.80818 | -0.000207 | -0.001424 | 0.000253  |
| 12.29815 | 10.12943 | 8.90340 | -0.001399 | -0.000916 | 0.001186  |
| 9.86930  | 10.08593 | 5.15631 | -0.005441 | -0.001447 | 0.001399  |
| 11.10021 | 7.94175  | 5.16862 | -0.000583 | -0.003076 | 0.001376  |
| 11.06206 | 9.43062  | 8.88839 | 0.004702  | 0.001606  | 0.002104  |
| 12.30255 | 11.56557 | 8.94694 | 0.005255  | -0.000360 | 0.000937  |
| 12.33169 | 7.23799  | 5.19447 | -0.001035 | 0.000245  | -0.001760 |
| 13.56437 | 9.38021  | 5.14435 | 0.000754  | 0.001626  | -0.000579 |
| 13.52754 | 7.98555  | 8.80171 | -0.000824 | -0.002427 | -0.003173 |
| 14.76233 | 10.12320 | 8.88285 | -0.005090 | 0.001335  | -0.001566 |
| 12.33257 | 10.08637 | 5.15511 | 0.002625  | 0.000546  | -0.001552 |
| 13.56350 | 7.94214  | 5.16485 | -0.000083 | -0.000886 | -0.000386 |
| 13.52731 | 9.42040  | 8.86925 | -0.000248 | 0.003163  | -0.000707 |
| 14.76430 | 11.55727 | 8.90646 | -0.001606 | -0.001277 | 0.001577  |
| 0.01611  | 11.52516 | 5.16621 | -0.001072 | -0.002592 | 0.000382  |
| 1.24770  | 13.67535 | 5.22209 | 0.001787  | -0.002593 | -0.002504 |
| 1.21217  | 12.26335 | 8.89409 | 0.000168  | -0.000503 | 0.001209  |
| 2.43998  | 14.38728 | 8.86748 | -0.002605 | 0.001981  | 0.000866  |
| 0.01699  | 14.35408 | 5.27295 | -0.000380 | -0.000339 | -0.001993 |
| 1.24794  | 12.22963 | 5.17275 | 0.001066  | 0.000835  | -0.001384 |

|         |          |         |           |           |           |
|---------|----------|---------|-----------|-----------|-----------|
| 1.21434 | 13.70818 | 8.88771 | 0.002263  | 0.001354  | 0.003913  |
| 2.47958 | 11.52580 | 5.14547 | -0.001609 | -0.000230 | -0.001483 |
| 3.71218 | 13.67636 | 5.19535 | 0.004778  | 0.000286  | 0.001019  |
| 3.66932 | 12.26248 | 8.88184 | -0.001731 | -0.000194 | -0.000636 |
| 4.89370 | 14.38589 | 8.86075 | 0.005115  | -0.000097 | -0.002575 |
| 2.48000 | 14.35596 | 5.23149 | 0.001263  | -0.000843 | 0.001690  |
| 3.71150 | 12.23022 | 5.15602 | 0.000897  | -0.004557 | 0.000991  |
| 3.66212 | 13.70366 | 8.87117 | -0.005489 | 0.003219  | -0.000485 |
| 4.94290 | 11.52542 | 5.14351 | -0.000079 | -0.001823 | -0.001611 |
| 6.17627 | 13.67505 | 5.20032 | 0.000855  | 0.000270  | 0.000026  |
| 6.13145 | 12.27911 | 8.90591 | 0.005983  | 0.006745  | 0.004668  |
| 7.36614 | 14.42967 | 8.88203 | 0.005256  | 0.002866  | 0.001472  |
| 4.94347 | 14.35627 | 5.21375 | 0.000009  | -0.001573 | 0.000949  |
| 6.17493 | 12.22917 | 5.16623 | -0.001446 | -0.001033 | 0.001552  |
| 6.11879 | 13.72336 | 8.87765 | 0.004547  | -0.001919 | -0.001448 |
| 7.40625 | 11.52413 | 5.16368 | 0.000904  | -0.003410 | 0.000343  |
| 8.63876 | 13.67323 | 5.24377 | 0.001722  | 0.001783  | -0.001332 |
| 8.58939 | 12.29067 | 9.00208 | 0.002885  | 0.003884  | 0.003505  |
| 9.83855 | 14.39048 | 9.30305 | -0.012399 | -0.277034 | -0.204616 |
| 7.40672 | 14.35386 | 5.23530 | -0.001177 | 0.000142  | -0.000822 |
| 8.63820 | 12.22778 | 5.19800 | 0.000297  | -0.001296 | 0.001065  |
| 8.55571 | 13.73596 | 9.04598 | -0.016493 | -0.022572 | -0.012501 |

|          |          |          |           |           |           |
|----------|----------|----------|-----------|-----------|-----------|
| 9.86985  | 11.52338 | 5.18893  | 0.001747  | -0.002042 | -0.000109 |
| 11.10099 | 13.67352 | 5.27669  | 0.003296  | -0.001125 | -0.000979 |
| 11.07378 | 12.27333 | 9.00891  | -0.007305 | 0.007162  | 0.001371  |
| 12.30694 | 14.38896 | 9.00333  | -0.005488 | 0.000172  | 0.001699  |
| 9.86934  | 14.35300 | 5.29564  | 0.002910  | 0.000345  | 0.000155  |
| 11.10161 | 12.22804 | 5.21650  | -0.001082 | -0.002781 | 0.001049  |
| 11.11464 | 13.70636 | 9.07877  | 0.023956  | -0.020418 | -0.015110 |
| 12.33326 | 11.52411 | 5.18815  | -0.000925 | 0.000244  | 0.000520  |
| 13.56430 | 13.67399 | 5.25995  | 0.001528  | -0.000302 | 0.000068  |
| 13.53626 | 12.26601 | 8.93587  | -0.003164 | 0.004520  | 0.002335  |
| 14.76266 | 14.38906 | 8.90426  | -0.004927 | 0.002691  | 0.003417  |
| 12.33397 | 14.35288 | 5.30710  | 0.002823  | -0.001532 | -0.001747 |
| 13.56505 | 12.22870 | 5.20105  | 0.000141  | 0.000086  | -0.001160 |
| 13.54921 | 13.70690 | 8.94399  | 0.000378  | -0.006527 | 0.000746  |
| 9.91126  | 15.53185 | 9.97972  | 0.085178  | 0.886225  | 0.686340  |
| 7.28864  | 16.40884 | 8.69813  | -0.003087 | 0.000137  | 0.000960  |
| 10.02526 | 16.50365 | 10.64498 | -0.064465 | -0.580825 | -0.449644 |

---

total drift:

-0.044807

0.025133

-0.021448

---

FREE ENERGIE OF THE ION-ELECTRON SYSTEM (eV)

-----

free energy TOTEN = -1209.38408620 eV

energy without entropy= -1209.38408620 energy(sigma->0) = -1209.38408620

d Force =-0.1616872E-03[-0.206E-01, 0.203E-01] d Energy =-0.1663951E-03 0.471E-05

d Force =-0.5670744E+01[-0.563E+01,-0.571E+01] d Ewald =-0.5670359E+01-0.386E-03

-----

POTLOK: cpu time 0.1747: real time 0.1753

-----

stress matrix after NEB project (eV)

-17.73860      -0.30749      0.02489

-0.30749      -15.47866      0.28651

0.02489      0.28651      -19.18559

FORCES: max atom, RMS      1.124150      0.110884

FORCE total and by dimension      1.344398      0.886225

Stress total and by dimension      30.375779      19.185585

Finite differences progress:

Degree of freedom:    3/ 6

Displacement:            2/ 2

Total:                    6/ 12

LATTYP: Found a simple orthorhombic cell.

ALAT            =      14.7806000000

B/A-ratio    =      1.2466138046

C/A-ratio    =      1.4433717170

Lattice vectors:

A1 = ( -14.7806000000,    0.0000000000,    0.0000000000)

A2 = (    0.0000000000,    0.0000000000, -18.4257000000)

A3 = (    0.0000000000, -21.3339000000,    0.0000000000)

Analysis of symmetry for initial positions (statically):

---

Subroutine PRICEL returns:

Original cell was already a primitive cell.

Routine SETGRP: Setting up the symmetry group for a  
simple orthorhombic supercell.

Subroutine GETGRP returns: Found 1 space group operations  
(whereof 1 operations were pure point group operations)  
out of a pool of 8 trial point group operations.

The static configuration has the point symmetry  $C_1$ .

Analysis of symmetry for dynamics (positions and initial velocities):

---

Subroutine PRICEL returns:

Original cell was already a primitive cell.

Routine SETGRP: Setting up the symmetry group for a  
simple orthorhombic supercell.

Subroutine GETGRP returns: Found 1 space group operations  
(whereof 1 operations were pure point group operations)  
out of a pool of 8 trial point group operations.

The dynamic configuration has the point symmetry  $C_1$ .

Analysis of constrained symmetry for selective dynamics:

=====

Subroutine PRICEL returns:

Original cell was already a primitive cell.

Routine SETGRP: Setting up the symmetry group for a

simple orthorhombic supercell.

Subroutine GETGRP returns: Found 1 space group operations

(whereof 1 operations were pure point group operations)

out of a pool of 8 trial point group operations.

The constrained configuration has the point symmetry C<sub>1</sub>.

Analysis of structural, dynamic, and magnetic symmetry:

=====

Subroutine PRICEL returns:

Original cell was already a primitive cell.

Routine SETGRP: Setting up the symmetry group for a

simple orthorhombic supercell.

Subroutine GETGRP returns: Found 1 space group operations

(whereof 1 operations were pure point group operations)

out of a pool of 8 trial point group operations.

The magnetic configuration has the point symmetry  $C_1$ .

Subroutine INISYM returns: Found 1 space group operations

(whereof 1 operations are pure point group operations),

and found 1 'primitive' translations

KPOINTS: KPT-Resolved Value to Generate K-Mesh: 0

Automatic generation of k-mesh.

Space group operators:

| irotn | det(A)   | alpha    | n_x      | n_y      | n_z      | tau_x    | tau_y    | tau_z    |
|-------|----------|----------|----------|----------|----------|----------|----------|----------|
| 1     | 1.000000 | 0.000000 | 1.000000 | 0.000000 | 0.000000 | 0.000000 | 0.000000 | 0.000000 |

Subroutine IBZKPT returns following result:

=====

Found 1 irreducible k-points:

Following reciprocal coordinates:

| Coordinates |          |          | Weight   |
|-------------|----------|----------|----------|
| 0.000000    | 0.000000 | 0.000000 | 1.000000 |

Following cartesian coordinates:

| Coordinates |          |          | Weight   |
|-------------|----------|----------|----------|
| 0.000000    | 0.000000 | 0.000000 | 1.000000 |

WAVPRE: cpu time 0.1238: real time 0.1412

FEWALD: cpu time 0.0027: real time 0.0027

ORTHCH: cpu time 1.0094: real time 1.0124

LOOP+: cpu time 189.5011: real time 190.5091

----- Iteration 8( 1) -----

POTLOK: cpu time 0.1708: real time 0.1837

|           |          |          |           |         |
|-----------|----------|----------|-----------|---------|
| SETDIJ:   | cpu time | 0.0101:  | real time | 0.0101  |
| EDDIAG:   | cpu time | 1.9347:  | real time | 1.9416  |
| RMM-DIIS: | cpu time | 7.2591:  | real time | 7.2979  |
| ORTHCH:   | cpu time | 0.3520:  | real time | 0.3535  |
| DOS:      | cpu time | 0.0004:  | real time | 0.0004  |
| CHARGE:   | cpu time | 0.5250:  | real time | 0.5266  |
| MIXING:   | cpu time | 0.0045:  | real time | 0.0046  |
| -----     |          |          |           |         |
| LOOP:     | cpu time | 10.2566: | real time | 10.3182 |

eigenvalue-minimisations : 1948

total energy-change (2. order) :-0.8666827E-02 (-0.1705332E+00)

number of electron      518.9999732 magnetization      0.9999998

augmentation part      11.7351772 magnetization      0.0542874

Broyden mixing:

rms(total) = 0.25305E-01      rms(broyden)= 0.25060E-01

rms(prec ) = 0.26183E-01

weight for this iteration      100.00

Free energy of the ion-electron system (eV)

-----

alpha Z PSCENC = 233.50077011  
Ewald energy TEWEN = 91328.42168117  
-Hartree energy DENC = -107333.84643981  
-exchange EXHF = 0.00000000  
-V(xc)+E(xc) XCENC = 1743.77783157  
PAW double counting = 52172.17608102 -52235.08933354  
entropy T\*S EENTRO = -0.00000000  
eigenvalues EBANDS = -5816.04555585  
atomic energy EATOM = 18704.32991668  
Solvation Ediel\_sol = 0.00000000

-----

free energy TOTEN = -1202.77504865 eV

energy without entropy = -1202.77504865 energy(sigma->0) = -1202.77504865

-----

|           |          |          |           |         |
|-----------|----------|----------|-----------|---------|
| POTLOK:   | cpu time | 0.1693:  | real time | 0.1764  |
| SETDIJ:   | cpu time | 0.0102:  | real time | 0.0102  |
| EDDIAG:   | cpu time | 1.9241:  | real time | 1.9306  |
| RMM-DIIS: | cpu time | 7.1355:  | real time | 7.1713  |
| ORTHCH:   | cpu time | 0.3552:  | real time | 0.3563  |
| DOS:      | cpu time | 0.0004:  | real time | 0.0004  |
| CHARGE:   | cpu time | 0.5207:  | real time | 0.5225  |
| MIXING:   | cpu time | 0.0048:  | real time | 0.0048  |
| -----     |          |          |           |         |
| LOOP:     | cpu time | 10.1202: | real time | 10.1724 |

eigenvalue-minimisations : 1920

total energy-change (2. order) : 0.3763119E-02 (-0.1155641E-02)

number of electron      518.9999732 magnetization      0.9999998

augmentation part      11.7371129 magnetization      0.0542824

Broyden mixing:

rms(total) = 0.16508E-01      rms(broyden)= 0.16490E-01

rms(prec ) = 0.17113E-01

weight for this iteration      100.00

eigenvalues of (default mixing \* dielectric matrix)

average eigenvalue GAMMA= 1.3913

1.3913

Free energy of the ion-electron system (eV)

-----

alpha Z PSCENC = 233.50077011

Ewald energy TEWEN = 91328.42168117

-Hartree energy DENC = -107334.18242975

-exchange EXHF = 0.00000000

-V(xc)+E(xc) XCENC = 1743.77523350

PAW double counting = 52172.83012727 -52235.74238613

entropy T\*S EENTRO = -0.00000000

eigenvalues EBANDS = -5815.70419838

atomic energy EATOM = 18704.32991668

Solvation Ediel\_sol = 0.00000000

-----

free energy TOTEN = -1202.77128553 eV

energy without entropy = -1202.77128553 energy(sigma->0) = -1202.77128553

-----

----- Iteration 8( 3) -----

|           |          |         |           |        |
|-----------|----------|---------|-----------|--------|
| POTLOK:   | cpu time | 0.1650: | real time | 0.1932 |
| SETDIJ:   | cpu time | 0.0102: | real time | 0.0102 |
| EDDIAG:   | cpu time | 1.9229: | real time | 1.9292 |
| RMM-DIIS: | cpu time | 7.2932: | real time | 7.3243 |
| ORTHCH:   | cpu time | 0.3521: | real time | 0.3532 |
| DOS:      | cpu time | 0.0004: | real time | 0.0004 |
| CHARGE:   | cpu time | 0.5220: | real time | 0.5237 |
| MIXING:   | cpu time | 0.0051: | real time | 0.0050 |

-----

|       |          |          |           |         |
|-------|----------|----------|-----------|---------|
| LOOP: | cpu time | 10.2709: | real time | 10.3394 |
|-------|----------|----------|-----------|---------|

eigenvalue-minimisations : 1953

total energy-change (2. order) : 0.1935985E-03 (-0.8671447E-04)

|                    |             |               |           |
|--------------------|-------------|---------------|-----------|
| number of electron | 518.9999732 | magnetization | 0.9999998 |
| augmentation part  | 11.7359441  | magnetization | 0.0542805 |

Broyden mixing:

rms(total) = 0.77920E-02      rms(broyden)= 0.77861E-02

rms(prec ) = 0.81280E-02

weight for this iteration      100.00

eigenvalues of (default mixing \* dielectric matrix)

average eigenvalue GAMMA=    1.4432

0.7044   2.1821

Free energy of the ion-electron system (eV)

-----

alpha Z          PSCENC =          233.50077011

Ewald energy    TEWEN   =          91328.42168117

-Hartree energ DENC   =   -107334.44901308

-exchange       EXHF     =          0.00000000

-V(xc)+E(xc)    XCENC   =          1743.78437426

PAW double counting   =   52173.98997359   -52236.90588047

entropy T\*S     EENTRO =          -0.00000000

eigenvalues     EBANDS =          -5815.44291419

atomic energy EATOM = 18704.32991668

Solvation Ediel\_sol = 0.00000000

-----  
free energy TOTEN = -1202.77109194 eV

energy without entropy = -1202.77109194 energy(sigma->0) = -1202.77109194

----- Iteration 8( 4) -----

POTLOK: cpu time 0.1664: real time 0.1808

SETDIJ: cpu time 0.0101: real time 0.0102

EDDIAG: cpu time 1.9251: real time 1.9310

RMM-DIIS: cpu time 7.2803: real time 7.3206

ORTHCH: cpu time 0.3541: real time 0.3551

DOS: cpu time 0.0004: real time 0.0004

CHARGE: cpu time 0.5225: real time 0.5242

MIXING: cpu time 0.0052: real time 0.0052

-----

LOOP: cpu time 10.2641: real time 10.3275

eigenvalue-minimisations : 1942

total energy-change (2. order) : 0.6034963E-05 (-0.1496626E-04)

number of electron 518.9999732 magnetization 0.9999998

augmentation part 11.7363183 magnetization 0.0542766

Broyden mixing:

rms(total) = 0.24291E-02 rms(broyden)= 0.24277E-02

rms(prec ) = 0.26141E-02

weight for this iteration 100.00

eigenvalues of (default mixing \* dielectric matrix)

average eigenvalue GAMMA= 1.3527

2.1983 1.0607 0.7990

Free energy of the ion-electron system (eV)

-----

alpha Z PSCENC = 233.50077011

Ewald energy TEWEN = 91328.42168117

-Hartree energy DENC = -107334.63107490

-exchange EXHF = 0.00000000

-V(xc)+E(xc) XCENC = 1743.78389677

PAW double counting = 52174.54836216 -52237.46494781

entropy T\*S EENTRO = -0.00000000

eigenvalues EBANDS = -5815.25969009

atomic energy EATOM = 18704.32991668

Solvation Ediel\_sol = 0.00000000

-----

free energy TOTEN = -1202.77108590 eV

energy without entropy = -1202.77108590 energy(sigma->0) = -1202.77108590

-----

----- Iteration 8( 5) -----

|           |          |          |           |         |
|-----------|----------|----------|-----------|---------|
| POTLOK:   | cpu time | 0.1663:  | real time | 0.1672  |
| SETDIJ:   | cpu time | 0.0102:  | real time | 0.0102  |
| EDDIAG:   | cpu time | 1.9304:  | real time | 1.9367  |
| RMM-DIIS: | cpu time | 7.0852:  | real time | 7.1160  |
| ORTHCH:   | cpu time | 0.3531:  | real time | 0.3540  |
| DOS:      | cpu time | 0.0004:  | real time | 0.0004  |
| CHARGE:   | cpu time | 0.5222:  | real time | 0.5239  |
| MIXING:   | cpu time | 0.0055:  | real time | 0.0055  |
| -----     |          |          |           |         |
| LOOP:     | cpu time | 10.0734: | real time | 10.1138 |

eigenvalue-minimisations : 1917

total energy-change (2. order) : 0.5937443E-05 (-0.1235139E-05)

number of electron      518.9999732 magnetization      0.9999998

augmentation part      11.7364924 magnetization      0.0542758

Broyden mixing:

rms(total) = 0.11161E-02      rms(broyden)= 0.11149E-02

rms(prec ) = 0.12062E-02

weight for this iteration      100.00

eigenvalues of (default mixing \* dielectric matrix)

average eigenvalue GAMMA= 1.4603

2.2627 1.9160 0.8312 0.8312

Free energy of the ion-electron system (eV)

-----

alpha Z PSCENC = 233.50077011

Ewald energy TEWEN = 91328.42168117

-Hartree energ DENC = -107334.69686883

-exchange EXHF = 0.00000000

-V(xc)+E(xc) XCENC = 1743.78340286

PAW double counting = 52174.50475961 -52237.42137682

entropy T\*S EENTRO = -0.00000000

eigenvalues EBANDS = -5815.19336474

atomic energy EATOM = 18704.32991668

Solvation Ediel\_sol = 0.00000000

-----

free energy TOTEN = -1202.77107996 eV

energy without entropy = -1202.77107996 energy(sigma->0) = -1202.77107996

-----

----- Iteration 8( 6) -----

|           |          |         |           |        |
|-----------|----------|---------|-----------|--------|
| POTLOK:   | cpu time | 0.1656: | real time | 0.1874 |
| SETDIJ:   | cpu time | 0.0100: | real time | 0.0101 |
| EDDIAG:   | cpu time | 1.9245: | real time | 1.9312 |
| RMM-DIIS: | cpu time | 6.9353: | real time | 6.9584 |
| ORTHCH:   | cpu time | 0.3517: | real time | 0.3529 |
| DOS:      | cpu time | 0.0004: | real time | 0.0004 |
| CHARGE:   | cpu time | 0.5210: | real time | 0.5226 |
| MIXING:   | cpu time | 0.0058: | real time | 0.0059 |
| -----     |          |         |           |        |
| LOOP:     | cpu time | 9.9142: | real time | 9.9688 |

eigenvalue-minimisations : 1867

total energy-change (2. order) :-0.4614099E-05 (-0.5461309E-06)

number of electron 518.9999732 magnetization 0.9999998

augmentation part      11.7365157 magnetization      0.0542763

Broyden mixing:

rms(total) = 0.43886E-03      rms(broyden)= 0.43818E-03

rms(prec ) = 0.52734E-03

weight for this iteration      100.00

eigenvalues of (default mixing \* dielectric matrix)

average eigenvalue GAMMA=      1.3598

2.4239   1.9405   0.8682   0.8682   0.6982

Free energy of the ion-electron system (eV)

-----

alpha Z      PSCENC =      233.50077011

Ewald energy      TEWEN =      91328.42168117

-Hartree energ DENC      =      -107334.78180394

-exchange      EXHF =      0.00000000

-V(xc)+E(xc)      XCENC =      1743.78374752

PAW double counting      =      52174.37799265      -52237.29489332

entropy T\*S      EENTRO =      -0.00000000

eigenvalues      EBANDS =      -5815.10849545

atomic energy      EATOM =      18704.32991668

Solvation Ediel\_sol = 0.00000000

-----

free energy TOTEN = -1202.77108458 eV

energy without entropy = -1202.77108458 energy(sigma->0) = -1202.77108458

-----

----- Iteration 8( 7) -----

|           |          |         |           |        |
|-----------|----------|---------|-----------|--------|
| POTLOK:   | cpu time | 0.1658: | real time | 0.1794 |
| SETDIJ:   | cpu time | 0.0101: | real time | 0.0101 |
| EDDIAG:   | cpu time | 1.9364: | real time | 1.9428 |
| RMM-DIIS: | cpu time | 5.9864: | real time | 6.0210 |
| ORTHCH:   | cpu time | 0.3512: | real time | 0.3524 |
| DOS:      | cpu time | 0.0004: | real time | 0.0004 |
| CHARGE:   | cpu time | 0.5219: | real time | 0.5235 |

MIXING: cpu time 0.0063: real time 0.0063

-----

LOOP: cpu time 8.9785: real time 9.0359

eigenvalue-minimisations : 1623

total energy-change (2. order) :-0.4034904E-05 (-0.6103102E-07)

number of electron 518.9999732 magnetization 0.9999998

augmentation part 11.7364982 magnetization 0.0542757

Broyden mixing:

rms(total) = 0.21633E-03 rms(broyden)= 0.21627E-03

rms( prec ) = 0.31068E-03

weight for this iteration 100.00

eigenvalues of (default mixing \* dielectric matrix)

average eigenvalue GAMMA= 1.3697

2.5677 1.6954 1.5826 0.8785 0.8785 0.6158

Free energy of the ion-electron system (eV)

-----

alpha Z PSCENC = 233.50077011

Ewald energy TEWEN = 91328.42168117

-Hartree energ DENC = -107334.81740817

-exchange EXHF = 0.00000000

-V(xc)+E(xc) XCENC = 1743.78404116

PAW double counting = 52174.33640527 -52237.25340167

entropy T\*S EENTRO = -0.00000000

eigenvalues EBANDS = -5815.07309317

atomic energy EATOM = 18704.32991668

Solvation Ediel\_sol = 0.00000000

-----  
free energy TOTEN = -1202.77108861 eV

energy without entropy = -1202.77108861 energy(sigma->0) = -1202.77108861

----- Iteration 8( 8) -----

|           |          |         |           |        |
|-----------|----------|---------|-----------|--------|
| POTLOK:   | cpu time | 0.1677: | real time | 0.1693 |
| SETDIJ:   | cpu time | 0.0101: | real time | 0.0102 |
| EDDIAG:   | cpu time | 1.9208: | real time | 1.9276 |
| RMM-DIIS: | cpu time | 5.9946: | real time | 6.0301 |
| ORTHCH:   | cpu time | 0.3518: | real time | 0.3529 |
| DOS:      | cpu time | 0.0004: | real time | 0.0004 |
| CHARGE:   | cpu time | 0.5217: | real time | 0.5235 |
| MIXING:   | cpu time | 0.0065: | real time | 0.0065 |
| -----     |          |         |           |        |
| LOOP:     | cpu time | 8.9737: | real time | 9.0206 |

eigenvalue-minimisations : 1653

total energy-change (2. order) :-0.6054557E-05 (-0.6476519E-07)

number of electron 518.9999732 magnetization 0.9999998

augmentation part 11.7364875 magnetization 0.0542754

Broyden mixing:

rms(total) = 0.12765E-03 rms(broyden)= 0.12757E-03

rms(prec ) = 0.21555E-03

weight for this iteration 100.00

eigenvalues of (default mixing \* dielectric matrix)

average eigenvalue GAMMA= 1.3458

2.6200 2.0974 1.1577 1.1577 0.8988 0.8799 0.6094

Free energy of the ion-electron system (eV)

-----

alpha Z PSCENC = 233.50077011

Ewald energy TEWEN = 91328.42168117

-Hartree energy DENC = -107334.85896059

-exchange EXHF = 0.00000000

-V(xc)+E(xc) XCENC = 1743.78431170

PAW double counting = 52174.28678995 -52237.20384993

entropy T\*S EENTRO = -0.00000000

eigenvalues EBANDS = -5815.03175377

atomic energy EATOM = 18704.32991668

Solvation Ediel\_sol = 0.00000000

-----

free energy TOTEN = -1202.77109467 eV

energy without entropy = -1202.77109467 energy(sigma->0) = -1202.77109467

-----

----- Iteration 8( 9) -----

|           |          |         |           |        |
|-----------|----------|---------|-----------|--------|
| POTLOK:   | cpu time | 0.1680: | real time | 0.1827 |
| SETDIJ:   | cpu time | 0.0102: | real time | 0.0102 |
| EDDIAG:   | cpu time | 1.9243: | real time | 1.9309 |
| RMM-DIIS: | cpu time | 5.2808: | real time | 5.3055 |
| ORTHCH:   | cpu time | 0.3519: | real time | 0.3531 |
| DOS:      | cpu time | 0.0004: | real time | 0.0004 |
| CHARGE:   | cpu time | 0.5216: | real time | 0.5234 |
| MIXING:   | cpu time | 0.0069: | real time | 0.0068 |

-----

|       |          |         |           |        |
|-------|----------|---------|-----------|--------|
| LOOP: | cpu time | 8.2640: | real time | 8.3130 |
|-------|----------|---------|-----------|--------|

eigenvalue-minimisations : 1447

total energy-change (2. order) :-0.5858972E-05 (-0.1389906E-07)

|                    |             |               |           |
|--------------------|-------------|---------------|-----------|
| number of electron | 518.9999732 | magnetization | 0.9999998 |
|--------------------|-------------|---------------|-----------|

|                   |            |               |           |
|-------------------|------------|---------------|-----------|
| augmentation part | 11.7364957 | magnetization | 0.0542754 |
|-------------------|------------|---------------|-----------|

Broyden mixing:

rms(total) = 0.74072E-04      rms(broyden)= 0.74012E-04

rms(prec ) = 0.14578E-03

weight for this iteration      100.00

eigenvalues of (default mixing \* dielectric matrix)

average eigenvalue GAMMA=    1.4258

2.7002   2.5165   1.5157   1.5157   0.8947   0.8947   0.7557   0.6130

Free energy of the ion-electron system (eV)

-----

alpha Z      PSCENC =      233.50077011

Ewald energy    TEWEN =      91328.42168117

-Hartree energy DENC    =    -107334.89329601

-exchange      EXHF    =      0.00000000

-V(xc)+E(xc)    XCENC =      1743.78443403

PAW double counting    =      52174.24668424    -52237.16375704

entropy T\*S      EENTRO =      -0.00000000

eigenvalues      EBANDS =      -5814.99753372

atomic energy    EATOM =      18704.32991668

Solvation    Ediel\_sol =      0.00000000

-----  
free energy    TOTEN    =    -1202.77110053 eV

energy without entropy =    -1202.77110053    energy(sigma->0) =    -1202.77110053

----- Iteration            8( 10) -----

|           |          |         |           |        |
|-----------|----------|---------|-----------|--------|
| POTLOK:   | cpu time | 0.1669: | real time | 0.1850 |
| SETDIJ:   | cpu time | 0.0101: | real time | 0.0102 |
| EDDIAG:   | cpu time | 1.9205: | real time | 1.9269 |
| RMM-DIIS: | cpu time | 5.5274: | real time | 5.5628 |
| ORTHCH:   | cpu time | 0.3534: | real time | 0.3544 |
| DOS:      | cpu time | 0.0004: | real time | 0.0004 |
| CHARGE:   | cpu time | 0.5218: | real time | 0.5235 |
| MIXING:   | cpu time | 0.0071: | real time | 0.0073 |

-----  
LOOP:  cpu time    8.5077: real time    8.5704

eigenvalue-minimisations : 1514

total energy-change (2. order) :-0.9110845E-05  (-0.2879863E-07)

number of electron    518.9999732 magnetization    0.9999998

augmentation part    11.7365030 magnetization    0.0542751

Broyden mixing:

rms(total) = 0.64571E-04    rms(broyden)= 0.64492E-04

rms(prec ) = 0.95178E-04

weight for this iteration    100.00

eigenvalues of (default mixing \* dielectric matrix)

average eigenvalue GAMMA=    1.5018

3.6519  2.5625  1.9194  1.1347  1.1347  0.9832  0.7986  0.7162  0.6150

Free energy of the ion-electron system (eV)

-----  
alpha Z           PSCENC =           233.50077011

Ewald energy    TEWEN  =           91328.42168117

-Hartree energ DENC  =   -107334.94414752

-exchange EXHF = 0.00000000  
-V(xc)+E(xc) XCENC = 1743.78465590  
PAW double counting = 52174.20702139 -52237.12411219  
entropy T\*S EENTRO = -0.00000000  
eigenvalues EBANDS = -5814.94689518  
atomic energy EATOM = 18704.32991668  
Solvation Ediel\_sol = 0.00000000

-----  
free energy TOTEN = -1202.77110964 eV

energy without entropy = -1202.77110964 energy(sigma->0) = -1202.77110964

----- Iteration 8( 11) -----

POTLOK: cpu time 0.1622: real time 0.1939

|           |          |         |           |        |
|-----------|----------|---------|-----------|--------|
| SETDIJ:   | cpu time | 0.0102: | real time | 0.0102 |
| EDDIAG:   | cpu time | 1.9202: | real time | 1.9264 |
| RMM-DIIS: | cpu time | 5.2492: | real time | 5.2711 |
| ORTHCH:   | cpu time | 0.3544: | real time | 0.3555 |
| DOS:      | cpu time | 0.0004: | real time | 0.0004 |
| CHARGE:   | cpu time | 0.5217: | real time | 0.5235 |
| MIXING:   | cpu time | 0.0076: | real time | 0.0076 |
| -----     |          |         |           |        |
| LOOP:     | cpu time | 8.2258: | real time | 8.2885 |

eigenvalue-minimisations : 1439

total energy-change (2. order) :-0.4980837E-05 (-0.1438706E-07)

number of electron 518.9999732 magnetization 0.9999998

augmentation part 11.7365003 magnetization 0.0542750

Broyden mixing:

rms(total) = 0.32486E-04 rms(broyden)= 0.32463E-04

rms(prec ) = 0.53014E-04

weight for this iteration 100.00

eigenvalues of (default mixing \* dielectric matrix)

average eigenvalue GAMMA= 1.5527

4.2357 2.5387 1.9872 1.3381 1.3381 0.9891 0.9891 0.8100 0.6833 0.6176

Free energy of the ion-electron system (eV)

-----

alpha Z PSCENC = 233.50077011

Ewald energy TEWEN = 91328.42168117

-Hartree energy DENC = -107334.97094552

-exchange EXHF = 0.00000000

-V(xc)+E(xc) XCENC = 1743.78479925

PAW double counting = 52174.19717616 -52237.11428249

entropy T\*S EENTRO = -0.00000000

eigenvalues EBANDS = -5814.92022999

atomic energy EATOM = 18704.32991668

Solvation Ediel\_sol = 0.00000000

-----

free energy TOTEN = -1202.77111462 eV

energy without entropy = -1202.77111462 energy(sigma->0) = -1202.77111462

-----

----- Iteration 8( 12) -----

|           |          |         |           |        |
|-----------|----------|---------|-----------|--------|
| POTLOK:   | cpu time | 0.1693: | real time | 0.1719 |
| SETDIJ:   | cpu time | 0.0101: | real time | 0.0101 |
| EDDIAG:   | cpu time | 1.9204: | real time | 1.9270 |
| RMM-DIIS: | cpu time | 5.0260: | real time | 5.0484 |
| ORTHCH:   | cpu time | 0.3518: | real time | 0.3530 |
| DOS:      | cpu time | 0.0004: | real time | 0.0004 |
| CHARGE:   | cpu time | 0.5219: | real time | 0.5234 |
| MIXING:   | cpu time | 0.0078: | real time | 0.0078 |

-----

|       |          |         |           |        |
|-------|----------|---------|-----------|--------|
| LOOP: | cpu time | 8.0075: | real time | 8.0420 |
|-------|----------|---------|-----------|--------|

eigenvalue-minimisations : 1385

total energy-change (2. order) :-0.4510330E-05 (-0.6240977E-08)

|                    |             |               |           |
|--------------------|-------------|---------------|-----------|
| number of electron | 518.9999732 | magnetization | 0.9999998 |
|--------------------|-------------|---------------|-----------|

|                   |            |               |           |
|-------------------|------------|---------------|-----------|
| augmentation part | 11.7364992 | magnetization | 0.0542750 |
|-------------------|------------|---------------|-----------|

Broyden mixing:

rms(total) = 0.25908E-04      rms(broyden)= 0.25899E-04

rms(prec ) = 0.37909E-04

weight for this iteration      100.00

eigenvalues of (default mixing \* dielectric matrix)

average eigenvalue GAMMA=    1.7110

5.7014   2.6406   2.4090   1.8627   1.1257   1.1257   0.9701   0.8492   0.8492   0.6671

0.6200

Free energy of the ion-electron system (eV)

-----

alpha Z          PSCENC =          233.50077011

Ewald energy    TEWEN =          91328.42168117

-Hartree energy DENC =   -107334.98525759

-exchange       EXHF =            0.00000000

-V(xc)+E(xc)    XCENC =          1743.78485014

PAW double counting =    52174.20257913   -52237.11968784

entropy T\*S     EENTRO =          -0.00000000

eigenvalues     EBANDS =       -5814.90597093

atomic energy   EATOM =          18704.32991668

Solvation    Ediel\_sol =          0.00000000

-----  
free energy    TOTEN    =    -1202.77111913 eV

energy without entropy =    -1202.77111913    energy(sigma->0) =    -1202.77111913

----- Iteration            8( 13) -----

|           |          |         |           |        |
|-----------|----------|---------|-----------|--------|
| POTLOK:   | cpu time | 0.1664: | real time | 0.1685 |
| SETDIJ:   | cpu time | 0.0099: | real time | 0.0099 |
| EDDIAG:   | cpu time | 1.9242: | real time | 1.9309 |
| RMM-DIIS: | cpu time | 4.8412: | real time | 4.8557 |
| ORTHCH:   | cpu time | 0.3530: | real time | 0.3540 |
| DOS:      | cpu time | 0.0004: | real time | 0.0004 |
| CHARGE:   | cpu time | 0.5219: | real time | 0.5236 |
| MIXING:   | cpu time | 0.0080: | real time | 0.0080 |

-----  
LOOP:  cpu time    7.8251: real time    7.8510

eigenvalue-minimisations : 1328

total energy-change (2. order) :-0.3746609E-05  (-0.4127137E-08)

number of electron    518.9999732 magnetization        0.9999998

augmentation part    11.7365016 magnetization        0.0542750

Broyden mixing:

rms(total) = 0.10946E-04    rms(broyden)= 0.10925E-04

rms(prec ) = 0.18382E-04

weight for this iteration    100.00

eigenvalues of (default mixing \* dielectric matrix)

average eigenvalue GAMMA=    1.7062

6.2524  2.7305  2.4638  1.8425  1.1459  1.1459  1.0078  1.0078  0.7977  0.7977

0.6209  0.6611

Free energy of the ion-electron system (eV)

-----  
alpha Z           PSCENC =        233.50077011

Ewald energy    TEWEN  =        91328.42168117

-Hartree energ DENC = -107334.99576467

-exchange EXHF = 0.00000000

-V(xc)+E(xc) XCENC = 1743.78486582

PAW double counting = 52174.20794104 -52237.12504533

entropy T\*S EENTRO = -0.00000000

eigenvalues EBANDS = -5814.89548770

atomic energy EATOM = 18704.32991668

Solvation Ediel\_sol = 0.00000000

-----  
free energy TOTEN = -1202.77112288 eV

energy without entropy = -1202.77112288 energy(sigma->0) = -1202.77112288

----- Iteration 8( 14) -----

|           |          |         |           |        |
|-----------|----------|---------|-----------|--------|
| POTLOK:   | cpu time | 0.1674: | real time | 0.1850 |
| SETDIJ:   | cpu time | 0.0100: | real time | 0.0101 |
| EDDIAG:   | cpu time | 1.9228: | real time | 1.9290 |
| RMM-DIIS: | cpu time | 4.6582: | real time | 4.6851 |
| ORTHCH:   | cpu time | 0.3523: | real time | 0.3534 |
| DOS:      | cpu time | 0.0004: | real time | 0.0003 |
| CHARGE:   | cpu time | 0.5213: | real time | 0.5230 |
| MIXING:   | cpu time | 0.0084: | real time | 0.0085 |
| -----     |          |         |           |        |
| LOOP:     | cpu time | 7.6409: | real time | 7.6944 |

eigenvalue-minimisations : 1248

total energy-change (2. order) :-0.1628337E-05 (-0.1187039E-08)

number of electron 518.9999732 magnetization 0.9999998

augmentation part 11.7365021 magnetization 0.0542750

Broyden mixing:

rms(total) = 0.77999E-05 rms(broyden)= 0.77958E-05

rms(prec ) = 0.12749E-04

weight for this iteration 100.00

eigenvalues of (default mixing \* dielectric matrix)

average eigenvalue GAMMA= 1.8027

6.9163 2.9779 2.6034 2.1046 1.8933 1.1380 1.1380 0.9828 0.8594 0.8594  
0.6969 0.6239 0.6416

Free energy of the ion-electron system (eV)

-----

alpha Z PSCENC = 233.50077011

Ewald energy TEWEN = 91328.42168117

-Hartree energ DENC = -107334.99783520

-exchange EXHF = 0.00000000

-V(xc)+E(xc) XCENC = 1743.78486574

PAW double counting = 52174.20761190 -52237.12471694

entropy T\*S EENTRO = -0.00000000

eigenvalues EBANDS = -5814.89341797

atomic energy EATOM = 18704.32991668

Solvation Ediel\_sol = 0.00000000

-----

free energy TOTEN = -1202.77112450 eV

energy without entropy = -1202.77112450 energy(sigma->0) = -1202.77112450

-----

----- Iteration 8( 15) -----

|           |          |         |           |        |
|-----------|----------|---------|-----------|--------|
| POTLOK:   | cpu time | 0.1672: | real time | 0.1860 |
| SETDIJ:   | cpu time | 0.0101: | real time | 0.0101 |
| EDDIAG:   | cpu time | 1.9242: | real time | 1.9306 |
| RMM-DIIS: | cpu time | 4.6990: | real time | 4.7145 |
| ORTHCH:   | cpu time | 0.3531: | real time | 0.3543 |
| DOS:      | cpu time | 0.0004: | real time | 0.0004 |
| CHARGE:   | cpu time | 0.5222: | real time | 0.5240 |
| MIXING:   | cpu time | 0.0089: | real time | 0.0089 |
| -----     |          |         |           |        |
| LOOP:     | cpu time | 7.6850: | real time | 7.7289 |

eigenvalue-minimisations : 1250

total energy-change (2. order) :-0.1102169E-05 (-0.9883729E-09)

number of electron 518.9999732 magnetization 0.9999998

augmentation part            11.7365019 magnetization            0.0542750

Broyden mixing:

rms(total) = 0.53381E-05      rms(broyden)= 0.53365E-05

rms(prec ) = 0.76826E-05

weight for this iteration      100.00

eigenvalues of (default mixing \* dielectric matrix)

average eigenvalue GAMMA=    1.8573

7.4376  3.8432  2.6237  2.3246  1.8086  1.1291  1.1291  1.0310  1.0310  0.8514

0.8514  0.6846  0.6285  0.6285

Free energy of the ion-electron system (eV)

-----

alpha Z            PSCENC =            233.50077011

Ewald energy      TEWEN =            91328.42168117

-Hartree energ DENC =    -107334.99925099

-exchange        EXHF =            0.00000000

-V(xc)+E(xc)      XCENC =            1743.78486259

PAW double counting =    52174.20656734    -52237.12367372

entropy T\*S       EENTRO =            -0.00000000

eigenvalues       EBANDS =            -5814.89199880

atomic energy EATOM = 18704.32991668

Solvation Ediel\_sol = 0.00000000

-----  
free energy TOTEN = -1202.77112561 eV

energy without entropy = -1202.77112561 energy(sigma->0) = -1202.77112561

----- Iteration 8( 16) -----

POTLOK: cpu time 0.1679: real time 0.1711

SETDIJ: cpu time 0.0100: real time 0.0100

EDDIAG: cpu time 1.9231: real time 1.9295

RMM-DIIS: cpu time 4.3071: real time 4.3203

ORTHCH: cpu time 0.3541: real time 0.3549

DOS: cpu time 0.0004: real time 0.0004

CHARGE:  cpu time     0.5212: real time     0.5229

MIXING:  cpu time     0.0094: real time     0.0095

-----

LOOP:  cpu time     7.2932: real time     7.3187

eigenvalue-minimisations  :  1069

total energy-change (2. order) :-0.3068344E-06  (-0.3625598E-09)

number of electron       518.9999732 magnetization       0.9999998

augmentation part       11.7365017 magnetization       0.0542750

Broyden mixing:

rms(total) = 0.28531E-05     rms(broyden)= 0.28509E-05

rms(prec ) = 0.44350E-05

weight for this iteration     100.00

eigenvalues of (default mixing \* dielectric matrix)

average eigenvalue GAMMA=    1.8557

7.6506  4.2327  2.6012  2.3485  1.7819  1.3643  1.1862  1.1862  1.0333  0.8636

0.8636  0.7882  0.6799  0.6272  0.6272

Free energy of the ion-electron system (eV)

-----

alpha Z        PSCENC =        233.50077011  
Ewald energy    TEWEN =        91328.42168117  
-Hartree energ DENC =    -107334.99963121  
-exchange       EXHF =            0.00000000  
-V(xc)+E(xc)   XCENC =        1743.78485831  
PAW double counting =    52174.20608348    -52237.12318980  
entropy T\*S     EENTRO =        -0.00000000  
eigenvalues     EBANDS =        -5814.89161465  
atomic energy   EATOM =        18704.32991668  
Solvation    Ediel\_sol =        0.00000000

-----

free energy     TOTEN =        -1202.77112591 eV

energy without entropy =    -1202.77112591    energy(sigma->0) =    -1202.77112591

-----

|           |          |                   |        |
|-----------|----------|-------------------|--------|
| POTLOK:   | cpu time | 0.1661: real time | 0.1669 |
| SETDIJ:   | cpu time | 0.0099: real time | 0.0100 |
| EDDIAG:   | cpu time | 1.9237: real time | 1.9294 |
| RMM-DIIS: | cpu time | 4.1750: real time | 4.1898 |
| ORTHCH:   | cpu time | 0.3552: real time | 0.3563 |
| DOS:      | cpu time | 0.0004: real time | 0.0004 |
| CHARGE:   | cpu time | 0.5208: real time | 0.5225 |
| MIXING:   | cpu time | 0.0094: real time | 0.0094 |
| -----     |          |                   |        |
| LOOP:     | cpu time | 7.1606: real time | 7.1846 |

eigenvalue-minimisations : 996

total energy-change (2. order) :-0.1465960E-06 (-0.1535287E-09)

number of electron 518.9999732 magnetization 0.9999998

augmentation part 11.7365017 magnetization 0.0542750

Broyden mixing:

rms(total) = 0.19033E-05 rms(broyden)= 0.19016E-05

rms(prec ) = 0.29257E-05

weight for this iteration 100.00

eigenvalues of (default mixing \* dielectric matrix)

average eigenvalue GAMMA= 1.9198

7.9137 4.8137 2.6295 2.6295 2.1778 1.7832 1.1519 1.1519 1.0595 1.0595

0.8596 0.8596 0.7100 0.6642 0.6241 0.6288

Free energy of the ion-electron system (eV)

-----  
alpha Z PSCENC = 233.50077011

Ewald energy TEWEN = 91328.42168117

-Hartree energ DENC = -107334.99968499

-exchange EXHF = 0.00000000

-V(xc)+E(xc) XCENC = 1743.78485404

PAW double counting = 52174.20554231 -52237.12264815

entropy T\*S EENTRO = -0.00000000

eigenvalues EBANDS = -5814.89155724

atomic energy EATOM = 18704.32991668

Solvation Ediel\_sol = 0.00000000

-----  
free energy TOTEN = -1202.77112606 eV

energy without entropy = -1202.77112606 energy(sigma->0) = -1202.77112606

-----

----- Iteration 8( 18) -----

|           |          |         |           |        |
|-----------|----------|---------|-----------|--------|
| POTLOK:   | cpu time | 0.1679: | real time | 0.1804 |
| SETDIJ:   | cpu time | 0.0100: | real time | 0.0100 |
| EDDIAG:   | cpu time | 1.9205: | real time | 1.9276 |
| RMM-DIIS: | cpu time | 4.1260: | real time | 4.1545 |
| ORTHCH:   | cpu time | 0.3544: | real time | 0.3554 |
| DOS:      | cpu time | 0.0003: | real time | 0.0003 |

-----

|       |          |         |           |        |
|-------|----------|---------|-----------|--------|
| LOOP: | cpu time | 6.5791: | real time | 6.6283 |
|-------|----------|---------|-----------|--------|

eigenvalue-minimisations : 963

total energy-change (2. order) :-0.7541530E-07 (-0.9362644E-10)

number of electron 518.9999732 magnetization 0.9999998

augmentation part            11.7365017 magnetization            0.0542750

Free energy of the ion-electron system (eV)

-----

alpha Z            PSCENC =            233.50077011

Ewald energy    TEWEN =            91328.42168117

-Hartree energ DENC =   -107334.99968340

-exchange        EXHF =            0.00000000

-V(xc)+E(xc)    XCENC =            1743.78485036

PAW double counting =    52174.20512007   -52237.12222572

entropy T\*S     EENTRO =           -0.00000000

eigenvalues     EBANDS =           -5814.89155540

atomic energy   EATOM =           18704.32991668

Solvation    Ediel\_sol =           0.00000000

-----

free energy     TOTEN =           -1202.77112613 eV

energy without entropy =   -1202.77112613    energy(sigma->0) =   -1202.77112613

-----

average (electrostatic) potential at core

the test charge radii are      0.5201   0.6991   1.0621   0.7215

(the norm of the test charge is                      1.0000)

|             |             |             |             |             |
|-------------|-------------|-------------|-------------|-------------|
| 1 -40.7532  | 2 -40.7511  | 3 -40.7525  | 4 -40.7511  | 5 -40.7532  |
| 6 -40.7554  | 7 -40.7528  | 8 -40.7606  | 9 -40.7524  | 10 -40.7600 |
| 11 -40.7539 | 12 -40.7559 | 13 -40.6507 | 14 -40.6965 | 15 -40.7709 |
| 16 -40.6988 | 17 -40.6927 | 18 -40.8587 | 19 -40.6797 | 20 -40.6673 |
| 21 -40.6890 | 22 -40.6623 | 23 -40.0888 | 24 -40.1297 | 25 -57.4593 |
| 26 -57.6704 | 27 -57.6573 | 28 -57.4692 | 29 -57.6640 | 30 -57.4593 |
| 31 -57.6702 | 32 -57.6569 | 33 -57.4671 | 34 -57.6689 | 35 -57.4601 |
| 36 -57.6721 | 37 -57.6569 | 38 -57.4694 | 39 -57.6747 | 40 -57.4591 |
| 41 -57.6761 | 42 -57.6571 | 43 -57.4743 | 44 -57.6893 | 45 -57.4591 |
| 46 -57.6750 | 47 -57.6579 | 48 -57.4744 | 49 -57.6804 | 50 -57.4603 |
| 51 -57.6717 | 52 -57.6576 | 53 -57.4721 | 54 -57.6667 | 55 -57.6372 |
| 56 -57.6632 | 57 -57.6875 | 58 -57.6839 | 59 -57.6669 | 60 -57.6697 |
| 61 -57.6907 | 62 -57.6754 | 63 -57.6374 | 64 -57.6627 | 65 -57.6896 |
| 66 -57.6953 | 67 -57.6652 | 68 -57.6695 | 69 -57.6944 | 70 -57.7018 |
| 71 -57.6369 | 72 -57.6641 | 73 -57.6972 | 74 -57.7222 | 75 -57.6661 |
| 76 -57.6701 | 77 -57.7066 | 78 -57.7516 | 79 -57.6371 | 80 -57.6667 |

|              |              |              |              |              |
|--------------|--------------|--------------|--------------|--------------|
| 81 -57.7110  | 82 -57.7527  | 83 -57.6693  | 84 -57.6716  | 85 -57.7381  |
| 86 -57.8421  | 87 -57.6395  | 88 -57.6674  | 89 -57.7129  | 90 -57.7178  |
| 91 -57.6740  | 92 -57.6719  | 93 -57.7426  | 94 -57.7606  | 95 -57.6379  |
| 96 -57.6655  | 97 -57.6966  | 98 -57.6913  | 99 -57.6713  | 100 -57.6706 |
| 101 -57.7085 | 102 -57.6865 | 103 -57.6608 | 104 -57.6315 | 105 -57.6462 |
| 106 -57.2908 | 107 -57.3886 | 108 -57.6317 | 109 -57.5982 | 110 -57.6597 |
| 111 -57.6314 | 112 -57.6428 | 113 -57.3100 | 114 -57.3943 | 115 -57.6310 |
| 116 -57.6002 | 117 -57.6589 | 118 -57.6232 | 119 -57.6987 | 120 -57.6841 |
| 121 -57.3880 | 122 -57.6298 | 123 -57.7101 | 124 -57.6599 | 125 -57.6259 |
| 126 -57.8333 | 127 -58.3306 | 128 -57.3614 | 129 -57.6350 | 130 -58.1428 |
| 131 -57.6678 | 132 -57.6351 | 133 -57.8023 | 134 -57.4168 | 135 -57.3725 |
| 136 -57.6389 | 137 -58.0802 | 138 -57.6642 | 139 -57.6309 | 140 -57.6719 |
| 141 -57.3000 | 142 -57.3787 | 143 -57.6343 | 144 -57.6482 | 145 -60.8417 |
| 146 -57.3165 | 147 -81.2580 |              |              |              |

E-fermi : -2.3169      XC(G=0): -2.7344      alpha+bet : -2.2521

spin component 1

k-point 1 : 0.0000 0.0000 0.0000

| band No. | band energies | occupation |
|----------|---------------|------------|
| 1        | -26.9562      | 1.00000    |
| 2        | -21.5691      | 1.00000    |
| 3        | -21.4721      | 1.00000    |
| 4        | -21.1003      | 1.00000    |
| 5        | -21.0692      | 1.00000    |
| 6        | -21.0153      | 1.00000    |
| 7        | -20.9793      | 1.00000    |
| 8        | -20.9773      | 1.00000    |
| 9        | -20.8917      | 1.00000    |
| 10       | -20.5584      | 1.00000    |
| 11       | -20.5039      | 1.00000    |
| 12       | -20.4122      | 1.00000    |
| 13       | -20.3987      | 1.00000    |
| 14       | -20.1270      | 1.00000    |
| 15       | -19.9764      | 1.00000    |
| 16       | -19.7039      | 1.00000    |
| 17       | -19.6281      | 1.00000    |
| 18       | -19.6002      | 1.00000    |
| 19       | -19.5846      | 1.00000    |
| 20       | -19.5293      | 1.00000    |

|    |          |         |
|----|----------|---------|
| 21 | -19.5275 | 1.00000 |
| 22 | -19.4993 | 1.00000 |
| 23 | -19.4817 | 1.00000 |
| 24 | -19.1125 | 1.00000 |
| 25 | -19.0760 | 1.00000 |
| 26 | -18.9791 | 1.00000 |
| 27 | -18.9655 | 1.00000 |
| 28 | -18.9012 | 1.00000 |
| 29 | -18.7342 | 1.00000 |
| 30 | -18.5053 | 1.00000 |
| 31 | -18.3598 | 1.00000 |
| 32 | -18.2760 | 1.00000 |
| 33 | -18.2528 | 1.00000 |
| 34 | -18.1842 | 1.00000 |
| 35 | -18.1821 | 1.00000 |
| 36 | -18.0805 | 1.00000 |
| 37 | -18.0767 | 1.00000 |
| 38 | -17.5622 | 1.00000 |
| 39 | -17.3140 | 1.00000 |
| 40 | -17.2883 | 1.00000 |
| 41 | -17.2833 | 1.00000 |
| 42 | -17.2106 | 1.00000 |

|    |          |         |
|----|----------|---------|
| 43 | -17.2042 | 1.00000 |
| 44 | -17.1774 | 1.00000 |
| 45 | -17.0234 | 1.00000 |
| 46 | -16.9509 | 1.00000 |
| 47 | -16.9333 | 1.00000 |
| 48 | -16.8938 | 1.00000 |
| 49 | -16.8920 | 1.00000 |
| 50 | -16.8507 | 1.00000 |
| 51 | -16.8424 | 1.00000 |
| 52 | -16.8218 | 1.00000 |
| 53 | -16.8195 | 1.00000 |
| 54 | -16.7300 | 1.00000 |
| 55 | -16.7269 | 1.00000 |
| 56 | -16.1780 | 1.00000 |
| 57 | -15.7302 | 1.00000 |
| 58 | -15.6928 | 1.00000 |
| 59 | -15.6611 | 1.00000 |
| 60 | -15.6378 | 1.00000 |
| 61 | -15.6168 | 1.00000 |
| 62 | -15.5544 | 1.00000 |
| 63 | -15.5505 | 1.00000 |
| 64 | -15.1761 | 1.00000 |

|    |          |         |
|----|----------|---------|
| 65 | -14.8107 | 1.00000 |
| 66 | -14.6091 | 1.00000 |
| 67 | -14.5787 | 1.00000 |
| 68 | -14.5355 | 1.00000 |
| 69 | -14.4990 | 1.00000 |
| 70 | -14.4693 | 1.00000 |
| 71 | -14.4431 | 1.00000 |
| 72 | -14.3346 | 1.00000 |
| 73 | -14.3063 | 1.00000 |
| 74 | -14.2804 | 1.00000 |
| 75 | -14.2727 | 1.00000 |
| 76 | -14.1831 | 1.00000 |
| 77 | -14.1793 | 1.00000 |
| 78 | -13.8912 | 1.00000 |
| 79 | -13.7606 | 1.00000 |
| 80 | -13.5943 | 1.00000 |
| 81 | -13.5491 | 1.00000 |
| 82 | -13.5301 | 1.00000 |
| 83 | -13.4985 | 1.00000 |
| 84 | -13.4465 | 1.00000 |
| 85 | -13.3648 | 1.00000 |
| 86 | -13.3462 | 1.00000 |

|     |          |         |
|-----|----------|---------|
| 87  | -13.1895 | 1.00000 |
| 88  | -12.7871 | 1.00000 |
| 89  | -12.7601 | 1.00000 |
| 90  | -12.7279 | 1.00000 |
| 91  | -12.6967 | 1.00000 |
| 92  | -12.6869 | 1.00000 |
| 93  | -12.6247 | 1.00000 |
| 94  | -12.4618 | 1.00000 |
| 95  | -12.4470 | 1.00000 |
| 96  | -12.3825 | 1.00000 |
| 97  | -12.3246 | 1.00000 |
| 98  | -12.2137 | 1.00000 |
| 99  | -12.2040 | 1.00000 |
| 100 | -12.1657 | 1.00000 |
| 101 | -11.9488 | 1.00000 |
| 102 | -11.6851 | 1.00000 |
| 103 | -11.6283 | 1.00000 |
| 104 | -11.6117 | 1.00000 |
| 105 | -11.5781 | 1.00000 |
| 106 | -11.1006 | 1.00000 |
| 107 | -11.0708 | 1.00000 |
| 108 | -10.8992 | 1.00000 |

|     |          |         |
|-----|----------|---------|
| 109 | -10.8882 | 1.00000 |
| 110 | -10.8324 | 1.00000 |
| 111 | -10.7113 | 1.00000 |
| 112 | -10.6798 | 1.00000 |
| 113 | -10.6623 | 1.00000 |
| 114 | -10.6472 | 1.00000 |
| 115 | -10.5900 | 1.00000 |
| 116 | -10.5816 | 1.00000 |
| 117 | -10.5723 | 1.00000 |
| 118 | -10.5685 | 1.00000 |
| 119 | -10.5268 | 1.00000 |
| 120 | -10.5260 | 1.00000 |
| 121 | -10.5112 | 1.00000 |
| 122 | -10.5034 | 1.00000 |
| 123 | -10.3792 | 1.00000 |
| 124 | -10.2937 | 1.00000 |
| 125 | -10.2568 | 1.00000 |
| 126 | -10.1882 | 1.00000 |
| 127 | -10.1871 | 1.00000 |
| 128 | -10.0636 | 1.00000 |
| 129 | -10.0251 | 1.00000 |
| 130 | -9.8911  | 1.00000 |

|     |         |         |
|-----|---------|---------|
| 131 | -9.8652 | 1.00000 |
| 132 | -9.7943 | 1.00000 |
| 133 | -9.7867 | 1.00000 |
| 134 | -9.7549 | 1.00000 |
| 135 | -9.6900 | 1.00000 |
| 136 | -9.4495 | 1.00000 |
| 137 | -9.4257 | 1.00000 |
| 138 | -9.3956 | 1.00000 |
| 139 | -9.3885 | 1.00000 |
| 140 | -9.3802 | 1.00000 |
| 141 | -9.3697 | 1.00000 |
| 142 | -9.3108 | 1.00000 |
| 143 | -9.3039 | 1.00000 |
| 144 | -9.2981 | 1.00000 |
| 145 | -9.2849 | 1.00000 |
| 146 | -9.2704 | 1.00000 |
| 147 | -9.0920 | 1.00000 |
| 148 | -9.0044 | 1.00000 |
| 149 | -8.9848 | 1.00000 |
| 150 | -8.9577 | 1.00000 |
| 151 | -8.9552 | 1.00000 |
| 152 | -8.7934 | 1.00000 |

|     |         |         |
|-----|---------|---------|
| 153 | -8.7462 | 1.00000 |
| 154 | -8.7350 | 1.00000 |
| 155 | -8.7185 | 1.00000 |
| 156 | -8.7092 | 1.00000 |
| 157 | -8.6877 | 1.00000 |
| 158 | -8.6784 | 1.00000 |
| 159 | -8.6690 | 1.00000 |
| 160 | -8.6542 | 1.00000 |
| 161 | -8.5949 | 1.00000 |
| 162 | -8.5835 | 1.00000 |
| 163 | -8.5766 | 1.00000 |
| 164 | -8.5682 | 1.00000 |
| 165 | -8.4883 | 1.00000 |
| 166 | -8.4573 | 1.00000 |
| 167 | -8.4365 | 1.00000 |
| 168 | -8.3459 | 1.00000 |
| 169 | -8.2978 | 1.00000 |
| 170 | -8.2749 | 1.00000 |
| 171 | -8.2641 | 1.00000 |
| 172 | -8.2337 | 1.00000 |
| 173 | -8.2327 | 1.00000 |
| 174 | -8.1521 | 1.00000 |

|     |         |         |
|-----|---------|---------|
| 175 | -8.1456 | 1.00000 |
| 176 | -8.0779 | 1.00000 |
| 177 | -8.0446 | 1.00000 |
| 178 | -8.0266 | 1.00000 |
| 179 | -8.0219 | 1.00000 |
| 180 | -7.9734 | 1.00000 |
| 181 | -7.9649 | 1.00000 |
| 182 | -7.9249 | 1.00000 |
| 183 | -7.9010 | 1.00000 |
| 184 | -7.8855 | 1.00000 |
| 185 | -7.8728 | 1.00000 |
| 186 | -7.8012 | 1.00000 |
| 187 | -7.7978 | 1.00000 |
| 188 | -7.7481 | 1.00000 |
| 189 | -7.7109 | 1.00000 |
| 190 | -7.6665 | 1.00000 |
| 191 | -7.6002 | 1.00000 |
| 192 | -7.5852 | 1.00000 |
| 193 | -7.5761 | 1.00000 |
| 194 | -7.5477 | 1.00000 |
| 195 | -7.4810 | 1.00000 |
| 196 | -7.4805 | 1.00000 |

|     |         |         |
|-----|---------|---------|
| 197 | -7.4293 | 1.00000 |
| 198 | -7.3249 | 1.00000 |
| 199 | -7.2498 | 1.00000 |
| 200 | -7.1590 | 1.00000 |
| 201 | -7.0668 | 1.00000 |
| 202 | -7.0422 | 1.00000 |
| 203 | -7.0285 | 1.00000 |
| 204 | -7.0138 | 1.00000 |
| 205 | -6.9970 | 1.00000 |
| 206 | -6.9901 | 1.00000 |
| 207 | -6.9758 | 1.00000 |
| 208 | -6.8667 | 1.00000 |
| 209 | -6.8211 | 1.00000 |
| 210 | -6.8020 | 1.00000 |
| 211 | -6.7936 | 1.00000 |
| 212 | -6.7324 | 1.00000 |
| 213 | -6.6878 | 1.00000 |
| 214 | -6.4713 | 1.00000 |
| 215 | -6.4254 | 1.00000 |
| 216 | -6.3963 | 1.00000 |
| 217 | -6.3915 | 1.00000 |
| 218 | -6.3744 | 1.00000 |

|     |         |         |
|-----|---------|---------|
| 219 | -6.3728 | 1.00000 |
| 220 | -6.3176 | 1.00000 |
| 221 | -6.3076 | 1.00000 |
| 222 | -6.2372 | 1.00000 |
| 223 | -6.2301 | 1.00000 |
| 224 | -6.2296 | 1.00000 |
| 225 | -6.0781 | 1.00000 |
| 226 | -6.0379 | 1.00000 |
| 227 | -5.7931 | 1.00000 |
| 228 | -5.7525 | 1.00000 |
| 229 | -5.6943 | 1.00000 |
| 230 | -5.6416 | 1.00000 |
| 231 | -5.6378 | 1.00000 |
| 232 | -5.5593 | 1.00000 |
| 233 | -5.5308 | 1.00000 |
| 234 | -5.4682 | 1.00000 |
| 235 | -5.4396 | 1.00000 |
| 236 | -5.1665 | 1.00000 |
| 237 | -5.0591 | 1.00000 |
| 238 | -5.0510 | 1.00000 |
| 239 | -5.0186 | 1.00000 |
| 240 | -4.9894 | 1.00000 |

|     |         |         |
|-----|---------|---------|
| 241 | -4.9112 | 1.00000 |
| 242 | -4.8540 | 1.00000 |
| 243 | -4.8228 | 1.00000 |
| 244 | -4.7902 | 1.00000 |
| 245 | -4.6820 | 1.00000 |
| 246 | -4.5730 | 1.00000 |
| 247 | -4.5717 | 1.00000 |
| 248 | -4.5060 | 1.00000 |
| 249 | -4.4461 | 1.00000 |
| 250 | -4.3842 | 1.00000 |
| 251 | -4.2932 | 1.00000 |
| 252 | -4.2661 | 1.00000 |
| 253 | -4.2131 | 1.00000 |
| 254 | -3.5595 | 1.00000 |
| 255 | -3.3549 | 1.00000 |
| 256 | -3.2015 | 1.00000 |
| 257 | -2.9396 | 1.00000 |
| 258 | -2.8487 | 1.00000 |
| 259 | -2.8241 | 1.00000 |
| 260 | -2.6075 | 1.00000 |
| 261 | -1.9089 | 0.00000 |
| 262 | -1.7685 | 0.00000 |

|     |         |         |
|-----|---------|---------|
| 263 | -1.7194 | 0.00000 |
| 264 | -1.3466 | 0.00000 |
| 265 | -1.3125 | 0.00000 |
| 266 | -1.1949 | 0.00000 |
| 267 | -0.7456 | 0.00000 |
| 268 | -0.5850 | 0.00000 |
| 269 | -0.5028 | 0.00000 |
| 270 | -0.3083 | 0.00000 |
| 271 | -0.3062 | 0.00000 |
| 272 | -0.2905 | 0.00000 |
| 273 | -0.1837 | 0.00000 |
| 274 | -0.0584 | 0.00000 |
| 275 | -0.0506 | 0.00000 |
| 276 | -0.0108 | 0.00000 |
| 277 | 0.0346  | 0.00000 |
| 278 | 0.0838  | 0.00000 |
| 279 | 0.1726  | 0.00000 |
| 280 | 0.2202  | 0.00000 |
| 281 | 0.2476  | 0.00000 |
| 282 | 0.4195  | 0.00000 |
| 283 | 0.4471  | 0.00000 |
| 284 | 0.4814  | 0.00000 |

|     |        |         |
|-----|--------|---------|
| 285 | 0.5972 | 0.00000 |
| 286 | 0.6737 | 0.00000 |
| 287 | 0.8185 | 0.00000 |
| 288 | 0.8729 | 0.00000 |
| 289 | 1.0477 | 0.00000 |
| 290 | 1.0889 | 0.00000 |
| 291 | 1.1206 | 0.00000 |
| 292 | 1.1621 | 0.00000 |
| 293 | 1.2230 | 0.00000 |
| 294 | 1.2443 | 0.00000 |
| 295 | 1.2875 | 0.00000 |
| 296 | 1.3141 | 0.00000 |
| 297 | 1.3465 | 0.00000 |
| 298 | 1.4115 | 0.00000 |
| 299 | 1.4664 | 0.00000 |
| 300 | 1.4822 | 0.00000 |
| 301 | 1.5533 | 0.00000 |
| 302 | 1.5867 | 0.00000 |
| 303 | 1.6237 | 0.00000 |
| 304 | 1.6777 | 0.00000 |
| 305 | 1.7506 | 0.00000 |
| 306 | 1.7629 | 0.00000 |

|     |        |         |
|-----|--------|---------|
| 307 | 1.8732 | 0.00000 |
| 308 | 1.8937 | 0.00000 |
| 309 | 1.9045 | 0.00000 |
| 310 | 1.9133 | 0.00000 |
| 311 | 2.1228 | 0.00000 |
| 312 | 2.1872 | 0.00000 |
| 313 | 2.2082 | 0.00000 |
| 314 | 2.2346 | 0.00000 |
| 315 | 2.2752 | 0.00000 |
| 316 | 2.2918 | 0.00000 |
| 317 | 2.3313 | 0.00000 |
| 318 | 2.3532 | 0.00000 |
| 319 | 2.3719 | 0.00000 |
| 320 | 2.3980 | 0.00000 |
| 321 | 2.4197 | 0.00000 |
| 322 | 2.4299 | 0.00000 |
| 323 | 2.4396 | 0.00000 |
| 324 | 2.4530 | 0.00000 |
| 325 | 2.4614 | 0.00000 |
| 326 | 2.5231 | 0.00000 |
| 327 | 2.5380 | 0.00000 |
| 328 | 2.7009 | 0.00000 |

|     |        |         |
|-----|--------|---------|
| 329 | 2.7282 | 0.00000 |
| 330 | 2.7529 | 0.00000 |
| 331 | 2.7562 | 0.00000 |
| 332 | 2.7648 | 0.00000 |
| 333 | 2.8143 | 0.00000 |
| 334 | 2.8334 | 0.00000 |
| 335 | 2.8593 | 0.00000 |
| 336 | 2.8909 | 0.00000 |
| 337 | 2.9238 | 0.00000 |
| 338 | 2.9463 | 0.00000 |
| 339 | 2.9786 | 0.00000 |
| 340 | 3.0052 | 0.00000 |
| 341 | 3.0342 | 0.00000 |
| 342 | 3.0436 | 0.00000 |
| 343 | 3.0659 | 0.00000 |
| 344 | 3.0847 | 0.00000 |
| 345 | 3.1503 | 0.00000 |
| 346 | 3.1617 | 0.00000 |
| 347 | 3.1795 | 0.00000 |
| 348 | 3.1914 | 0.00000 |
| 349 | 3.3008 | 0.00000 |
| 350 | 3.3226 | 0.00000 |

|     |        |         |
|-----|--------|---------|
| 351 | 3.3523 | 0.00000 |
| 352 | 3.3672 | 0.00000 |
| 353 | 3.3889 | 0.00000 |
| 354 | 3.4317 | 0.00000 |
| 355 | 3.4764 | 0.00000 |
| 356 | 3.4841 | 0.00000 |
| 357 | 3.4860 | 0.00000 |
| 358 | 3.4981 | 0.00000 |
| 359 | 3.6336 | 0.00000 |
| 360 | 3.6726 | 0.00000 |
| 361 | 3.6879 | 0.00000 |
| 362 | 3.7322 | 0.00000 |
| 363 | 3.7508 | 0.00000 |
| 364 | 3.7586 | 0.00000 |
| 365 | 3.7723 | 0.00000 |
| 366 | 3.7937 | 0.00000 |
| 367 | 3.8117 | 0.00000 |
| 368 | 3.8334 | 0.00000 |
| 369 | 3.8379 | 0.00000 |
| 370 | 3.8516 | 0.00000 |
| 371 | 3.8762 | 0.00000 |
| 372 | 3.8836 | 0.00000 |

|     |        |         |
|-----|--------|---------|
| 373 | 3.9099 | 0.00000 |
| 374 | 3.9235 | 0.00000 |
| 375 | 3.9336 | 0.00000 |
| 376 | 3.9573 | 0.00000 |
| 377 | 3.9722 | 0.00000 |
| 378 | 3.9838 | 0.00000 |
| 379 | 4.0160 | 0.00000 |
| 380 | 4.0681 | 0.00000 |
| 381 | 4.1645 | 0.00000 |
| 382 | 4.2460 | 0.00000 |
| 383 | 4.2574 | 0.00000 |
| 384 | 4.2582 | 0.00000 |
| 385 | 4.2853 | 0.00000 |
| 386 | 4.3130 | 0.00000 |
| 387 | 4.3271 | 0.00000 |
| 388 | 4.3410 | 0.00000 |
| 389 | 4.3708 | 0.00000 |
| 390 | 4.3808 | 0.00000 |
| 391 | 4.4173 | 0.00000 |
| 392 | 4.4447 | 0.00000 |
| 393 | 4.4690 | 0.00000 |
| 394 | 4.4800 | 0.00000 |

|     |        |         |
|-----|--------|---------|
| 395 | 4.4857 | 0.00000 |
| 396 | 4.4961 | 0.00000 |
| 397 | 4.5169 | 0.00000 |
| 398 | 4.5505 | 0.00000 |
| 399 | 4.5898 | 0.00000 |
| 400 | 4.6077 | 0.00000 |
| 401 | 4.6270 | 0.00000 |
| 402 | 4.6421 | 0.00000 |
| 403 | 4.6565 | 0.00000 |
| 404 | 4.6793 | 0.00000 |
| 405 | 4.7038 | 0.00000 |
| 406 | 4.7312 | 0.00000 |
| 407 | 4.7463 | 0.00000 |
| 408 | 4.7669 | 0.00000 |
| 409 | 4.7829 | 0.00000 |
| 410 | 4.7836 | 0.00000 |
| 411 | 4.7971 | 0.00000 |
| 412 | 4.8280 | 0.00000 |
| 413 | 4.8630 | 0.00000 |
| 414 | 4.8718 | 0.00000 |
| 415 | 4.8976 | 0.00000 |
| 416 | 4.9310 | 0.00000 |

|     |        |         |
|-----|--------|---------|
| 417 | 4.9839 | 0.00000 |
| 418 | 5.0043 | 0.00000 |
| 419 | 5.0106 | 0.00000 |
| 420 | 5.0350 | 0.00000 |
| 421 | 5.0389 | 0.00000 |
| 422 | 5.0639 | 0.00000 |
| 423 | 5.0815 | 0.00000 |
| 424 | 5.1141 | 0.00000 |
| 425 | 5.1175 | 0.00000 |
| 426 | 5.1369 | 0.00000 |
| 427 | 5.1405 | 0.00000 |
| 428 | 5.1534 | 0.00000 |
| 429 | 5.1747 | 0.00000 |
| 430 | 5.1848 | 0.00000 |
| 431 | 5.1877 | 0.00000 |
| 432 | 5.2148 | 0.00000 |
| 433 | 5.2351 | 0.00000 |
| 434 | 5.2401 | 0.00000 |
| 435 | 5.2554 | 0.00000 |
| 436 | 5.2891 | 0.00000 |
| 437 | 5.2953 | 0.00000 |
| 438 | 5.3087 | 0.00000 |

|     |        |         |
|-----|--------|---------|
| 439 | 5.3315 | 0.00000 |
| 440 | 5.3489 | 0.00000 |
| 441 | 5.3667 | 0.00000 |
| 442 | 5.3736 | 0.00000 |
| 443 | 5.3921 | 0.00000 |
| 444 | 5.4203 | 0.00000 |
| 445 | 5.4533 | 0.00000 |
| 446 | 5.4628 | 0.00000 |
| 447 | 5.4815 | 0.00000 |
| 448 | 5.4947 | 0.00000 |
| 449 | 5.5187 | 0.00000 |
| 450 | 5.5494 | 0.00000 |
| 451 | 5.5666 | 0.00000 |
| 452 | 5.5748 | 0.00000 |
| 453 | 5.5954 | 0.00000 |
| 454 | 5.6149 | 0.00000 |
| 455 | 5.6577 | 0.00000 |
| 456 | 5.6813 | 0.00000 |
| 457 | 5.7090 | 0.00000 |
| 458 | 5.7222 | 0.00000 |
| 459 | 5.7436 | 0.00000 |
| 460 | 5.7572 | 0.00000 |

|     |        |         |
|-----|--------|---------|
| 461 | 5.7813 | 0.00000 |
| 462 | 5.7891 | 0.00000 |
| 463 | 5.7948 | 0.00000 |
| 464 | 5.8005 | 0.00000 |
| 465 | 5.8069 | 0.00000 |
| 466 | 5.8231 | 0.00000 |
| 467 | 5.8426 | 0.00000 |
| 468 | 5.8540 | 0.00000 |
| 469 | 5.8728 | 0.00000 |
| 470 | 5.8804 | 0.00000 |
| 471 | 5.8856 | 0.00000 |
| 472 | 5.9087 | 0.00000 |
| 473 | 5.9134 | 0.00000 |
| 474 | 5.9396 | 0.00000 |
| 475 | 5.9505 | 0.00000 |
| 476 | 5.9696 | 0.00000 |
| 477 | 5.9761 | 0.00000 |
| 478 | 6.0009 | 0.00000 |
| 479 | 6.0102 | 0.00000 |
| 480 | 6.0669 | 0.00000 |

spin component 2

k-point 1 : 0.0000 0.0000 0.0000

| band No. | band energies | occupation |
|----------|---------------|------------|
| 1        | -26.9495      | 1.00000    |
| 2        | -21.5679      | 1.00000    |
| 3        | -21.4706      | 1.00000    |
| 4        | -21.0984      | 1.00000    |
| 5        | -21.0683      | 1.00000    |
| 6        | -21.0126      | 1.00000    |
| 7        | -20.9779      | 1.00000    |
| 8        | -20.9755      | 1.00000    |
| 9        | -20.8811      | 1.00000    |
| 10       | -20.5554      | 1.00000    |
| 11       | -20.5005      | 1.00000    |
| 12       | -20.4012      | 1.00000    |
| 13       | -20.3890      | 1.00000    |
| 14       | -20.1228      | 1.00000    |
| 15       | -19.9533      | 1.00000    |
| 16       | -19.7011      | 1.00000    |
| 17       | -19.6269      | 1.00000    |
| 18       | -19.5981      | 1.00000    |
| 19       | -19.5782      | 1.00000    |

|    |          |         |
|----|----------|---------|
| 20 | -19.5280 | 1.00000 |
| 21 | -19.5257 | 1.00000 |
| 22 | -19.4766 | 1.00000 |
| 23 | -19.4623 | 1.00000 |
| 24 | -19.1101 | 1.00000 |
| 25 | -19.0736 | 1.00000 |
| 26 | -18.9692 | 1.00000 |
| 27 | -18.9560 | 1.00000 |
| 28 | -18.8964 | 1.00000 |
| 29 | -18.7045 | 1.00000 |
| 30 | -18.5022 | 1.00000 |
| 31 | -18.3527 | 1.00000 |
| 32 | -18.2478 | 1.00000 |
| 33 | -18.2276 | 1.00000 |
| 34 | -18.1790 | 1.00000 |
| 35 | -18.1767 | 1.00000 |
| 36 | -18.0604 | 1.00000 |
| 37 | -18.0571 | 1.00000 |
| 38 | -17.5588 | 1.00000 |
| 39 | -17.2977 | 1.00000 |
| 40 | -17.2877 | 1.00000 |
| 41 | -17.2740 | 1.00000 |

|    |          |         |
|----|----------|---------|
| 42 | -17.2083 | 1.00000 |
| 43 | -17.2072 | 1.00000 |
| 44 | -17.1744 | 1.00000 |
| 45 | -17.0195 | 1.00000 |
| 46 | -16.9421 | 1.00000 |
| 47 | -16.9229 | 1.00000 |
| 48 | -16.8712 | 1.00000 |
| 49 | -16.8702 | 1.00000 |
| 50 | -16.8299 | 1.00000 |
| 51 | -16.8235 | 1.00000 |
| 52 | -16.8185 | 1.00000 |
| 53 | -16.8160 | 1.00000 |
| 54 | -16.7318 | 1.00000 |
| 55 | -16.7257 | 1.00000 |
| 56 | -16.1754 | 1.00000 |
| 57 | -15.7294 | 1.00000 |
| 58 | -15.6584 | 1.00000 |
| 59 | -15.6441 | 1.00000 |
| 60 | -15.6215 | 1.00000 |
| 61 | -15.5673 | 1.00000 |
| 62 | -15.5285 | 1.00000 |
| 63 | -15.5257 | 1.00000 |

|    |          |         |
|----|----------|---------|
| 64 | -15.1724 | 1.00000 |
| 65 | -14.8085 | 1.00000 |
| 66 | -14.6069 | 1.00000 |
| 67 | -14.5612 | 1.00000 |
| 68 | -14.5010 | 1.00000 |
| 69 | -14.4992 | 1.00000 |
| 70 | -14.4653 | 1.00000 |
| 71 | -14.4387 | 1.00000 |
| 72 | -14.3312 | 1.00000 |
| 73 | -14.2986 | 1.00000 |
| 74 | -14.2686 | 1.00000 |
| 75 | -14.2645 | 1.00000 |
| 76 | -14.1651 | 1.00000 |
| 77 | -14.1617 | 1.00000 |
| 78 | -13.8903 | 1.00000 |
| 79 | -13.7582 | 1.00000 |
| 80 | -13.5916 | 1.00000 |
| 81 | -13.5385 | 1.00000 |
| 82 | -13.5190 | 1.00000 |
| 83 | -13.4949 | 1.00000 |
| 84 | -13.4448 | 1.00000 |
| 85 | -13.3443 | 1.00000 |

|     |          |         |
|-----|----------|---------|
| 86  | -13.3416 | 1.00000 |
| 87  | -13.1880 | 1.00000 |
| 88  | -12.7807 | 1.00000 |
| 89  | -12.7506 | 1.00000 |
| 90  | -12.7190 | 1.00000 |
| 91  | -12.6782 | 1.00000 |
| 92  | -12.6712 | 1.00000 |
| 93  | -12.6225 | 1.00000 |
| 94  | -12.4492 | 1.00000 |
| 95  | -12.4321 | 1.00000 |
| 96  | -12.3790 | 1.00000 |
| 97  | -12.3237 | 1.00000 |
| 98  | -12.2091 | 1.00000 |
| 99  | -12.1988 | 1.00000 |
| 100 | -12.1642 | 1.00000 |
| 101 | -11.9460 | 1.00000 |
| 102 | -11.6822 | 1.00000 |
| 103 | -11.6117 | 1.00000 |
| 104 | -11.5925 | 1.00000 |
| 105 | -11.5710 | 1.00000 |
| 106 | -11.0984 | 1.00000 |
| 107 | -11.0681 | 1.00000 |

|     |          |         |
|-----|----------|---------|
| 108 | -10.8901 | 1.00000 |
| 109 | -10.8777 | 1.00000 |
| 110 | -10.8295 | 1.00000 |
| 111 | -10.7053 | 1.00000 |
| 112 | -10.6786 | 1.00000 |
| 113 | -10.6593 | 1.00000 |
| 114 | -10.6423 | 1.00000 |
| 115 | -10.5821 | 1.00000 |
| 116 | -10.5746 | 1.00000 |
| 117 | -10.5695 | 1.00000 |
| 118 | -10.5656 | 1.00000 |
| 119 | -10.5162 | 1.00000 |
| 120 | -10.5153 | 1.00000 |
| 121 | -10.5021 | 1.00000 |
| 122 | -10.4974 | 1.00000 |
| 123 | -10.3784 | 1.00000 |
| 124 | -10.2928 | 1.00000 |
| 125 | -10.2559 | 1.00000 |
| 126 | -10.1848 | 1.00000 |
| 127 | -10.1836 | 1.00000 |
| 128 | -10.0541 | 1.00000 |
| 129 | -10.0175 | 1.00000 |

|     |         |         |
|-----|---------|---------|
| 130 | -9.8883 | 1.00000 |
| 131 | -9.8628 | 1.00000 |
| 132 | -9.7861 | 1.00000 |
| 133 | -9.7777 | 1.00000 |
| 134 | -9.7524 | 1.00000 |
| 135 | -9.6875 | 1.00000 |
| 136 | -9.4478 | 1.00000 |
| 137 | -9.4223 | 1.00000 |
| 138 | -9.3846 | 1.00000 |
| 139 | -9.3797 | 1.00000 |
| 140 | -9.3725 | 1.00000 |
| 141 | -9.3601 | 1.00000 |
| 142 | -9.3084 | 1.00000 |
| 143 | -9.3011 | 1.00000 |
| 144 | -9.2974 | 1.00000 |
| 145 | -9.2836 | 1.00000 |
| 146 | -9.2482 | 1.00000 |
| 147 | -9.0908 | 1.00000 |
| 148 | -9.0009 | 1.00000 |
| 149 | -8.9787 | 1.00000 |
| 150 | -8.9439 | 1.00000 |
| 151 | -8.9428 | 1.00000 |

|     |         |         |
|-----|---------|---------|
| 152 | -8.7909 | 1.00000 |
| 153 | -8.7382 | 1.00000 |
| 154 | -8.7326 | 1.00000 |
| 155 | -8.7129 | 1.00000 |
| 156 | -8.7059 | 1.00000 |
| 157 | -8.6706 | 1.00000 |
| 158 | -8.6643 | 1.00000 |
| 159 | -8.6567 | 1.00000 |
| 160 | -8.6535 | 1.00000 |
| 161 | -8.5776 | 1.00000 |
| 162 | -8.5715 | 1.00000 |
| 163 | -8.5667 | 1.00000 |
| 164 | -8.5497 | 1.00000 |
| 165 | -8.4879 | 1.00000 |
| 166 | -8.4567 | 1.00000 |
| 167 | -8.4349 | 1.00000 |
| 168 | -8.3432 | 1.00000 |
| 169 | -8.2947 | 1.00000 |
| 170 | -8.2733 | 1.00000 |
| 171 | -8.2336 | 1.00000 |
| 172 | -8.2300 | 1.00000 |
| 173 | -8.2279 | 1.00000 |

|     |         |         |
|-----|---------|---------|
| 174 | -8.1419 | 1.00000 |
| 175 | -8.1344 | 1.00000 |
| 176 | -8.0746 | 1.00000 |
| 177 | -8.0425 | 1.00000 |
| 178 | -8.0138 | 1.00000 |
| 179 | -8.0073 | 1.00000 |
| 180 | -7.9688 | 1.00000 |
| 181 | -7.9599 | 1.00000 |
| 182 | -7.9208 | 1.00000 |
| 183 | -7.8914 | 1.00000 |
| 184 | -7.8717 | 1.00000 |
| 185 | -7.8640 | 1.00000 |
| 186 | -7.7924 | 1.00000 |
| 187 | -7.7885 | 1.00000 |
| 188 | -7.7387 | 1.00000 |
| 189 | -7.6794 | 1.00000 |
| 190 | -7.6365 | 1.00000 |
| 191 | -7.5980 | 1.00000 |
| 192 | -7.5774 | 1.00000 |
| 193 | -7.5551 | 1.00000 |
| 194 | -7.5401 | 1.00000 |
| 195 | -7.4730 | 1.00000 |

|     |         |         |
|-----|---------|---------|
| 196 | -7.4729 | 1.00000 |
| 197 | -7.4282 | 1.00000 |
| 198 | -7.3240 | 1.00000 |
| 199 | -7.2365 | 1.00000 |
| 200 | -7.1559 | 1.00000 |
| 201 | -7.0561 | 1.00000 |
| 202 | -7.0367 | 1.00000 |
| 203 | -7.0162 | 1.00000 |
| 204 | -6.9857 | 1.00000 |
| 205 | -6.9779 | 1.00000 |
| 206 | -6.9728 | 1.00000 |
| 207 | -6.9414 | 1.00000 |
| 208 | -6.8630 | 1.00000 |
| 209 | -6.8168 | 1.00000 |
| 210 | -6.7959 | 1.00000 |
| 211 | -6.7884 | 1.00000 |
| 212 | -6.7257 | 1.00000 |
| 213 | -6.6784 | 1.00000 |
| 214 | -6.4681 | 1.00000 |
| 215 | -6.3955 | 1.00000 |
| 216 | -6.3832 | 1.00000 |
| 217 | -6.3788 | 1.00000 |

|     |         |         |
|-----|---------|---------|
| 218 | -6.3635 | 1.00000 |
| 219 | -6.3389 | 1.00000 |
| 220 | -6.3038 | 1.00000 |
| 221 | -6.2761 | 1.00000 |
| 222 | -6.2299 | 1.00000 |
| 223 | -6.2285 | 1.00000 |
| 224 | -6.2229 | 1.00000 |
| 225 | -6.0474 | 1.00000 |
| 226 | -6.0094 | 1.00000 |
| 227 | -5.7568 | 1.00000 |
| 228 | -5.7118 | 1.00000 |
| 229 | -5.6926 | 1.00000 |
| 230 | -5.6361 | 1.00000 |
| 231 | -5.6234 | 1.00000 |
| 232 | -5.5444 | 1.00000 |
| 233 | -5.5237 | 1.00000 |
| 234 | -5.4418 | 1.00000 |
| 235 | -5.4122 | 1.00000 |
| 236 | -5.1445 | 1.00000 |
| 237 | -5.0605 | 1.00000 |
| 238 | -5.0266 | 1.00000 |
| 239 | -5.0229 | 1.00000 |

|     |         |         |
|-----|---------|---------|
| 240 | -4.9599 | 1.00000 |
| 241 | -4.8784 | 1.00000 |
| 242 | -4.8548 | 1.00000 |
| 243 | -4.8032 | 1.00000 |
| 244 | -4.7782 | 1.00000 |
| 245 | -4.6516 | 1.00000 |
| 246 | -4.5792 | 1.00000 |
| 247 | -4.5761 | 1.00000 |
| 248 | -4.4761 | 1.00000 |
| 249 | -4.4218 | 1.00000 |
| 250 | -4.3954 | 1.00000 |
| 251 | -4.2970 | 1.00000 |
| 252 | -4.2273 | 1.00000 |
| 253 | -4.1757 | 1.00000 |
| 254 | -3.5332 | 1.00000 |
| 255 | -3.3095 | 1.00000 |
| 256 | -3.1421 | 1.00000 |
| 257 | -2.9446 | 1.00000 |
| 258 | -2.7996 | 1.00000 |
| 259 | -2.7406 | 1.00000 |
| 260 | -2.0613 | 0.00000 |
| 261 | -1.9149 | 0.00000 |

|     |         |         |
|-----|---------|---------|
| 262 | -1.7233 | 0.00000 |
| 263 | -1.6795 | 0.00000 |
| 264 | -1.3007 | 0.00000 |
| 265 | -1.2815 | 0.00000 |
| 266 | -1.1598 | 0.00000 |
| 267 | -0.7242 | 0.00000 |
| 268 | -0.5844 | 0.00000 |
| 269 | -0.5103 | 0.00000 |
| 270 | -0.2812 | 0.00000 |
| 271 | -0.2781 | 0.00000 |
| 272 | -0.2604 | 0.00000 |
| 273 | -0.1570 | 0.00000 |
| 274 | -0.0586 | 0.00000 |
| 275 | -0.0487 | 0.00000 |
| 276 | 0.0127  | 0.00000 |
| 277 | 0.0396  | 0.00000 |
| 278 | 0.0787  | 0.00000 |
| 279 | 0.2077  | 0.00000 |
| 280 | 0.2553  | 0.00000 |
| 281 | 0.2792  | 0.00000 |
| 282 | 0.4331  | 0.00000 |
| 283 | 0.4515  | 0.00000 |

|     |        |         |
|-----|--------|---------|
| 284 | 0.4827 | 0.00000 |
| 285 | 0.6019 | 0.00000 |
| 286 | 0.6941 | 0.00000 |
| 287 | 0.8213 | 0.00000 |
| 288 | 0.8796 | 0.00000 |
| 289 | 1.0574 | 0.00000 |
| 290 | 1.1070 | 0.00000 |
| 291 | 1.1417 | 0.00000 |
| 292 | 1.1766 | 0.00000 |
| 293 | 1.2319 | 0.00000 |
| 294 | 1.2502 | 0.00000 |
| 295 | 1.3088 | 0.00000 |
| 296 | 1.3195 | 0.00000 |
| 297 | 1.3601 | 0.00000 |
| 298 | 1.4306 | 0.00000 |
| 299 | 1.4786 | 0.00000 |
| 300 | 1.4999 | 0.00000 |
| 301 | 1.5777 | 0.00000 |
| 302 | 1.6028 | 0.00000 |
| 303 | 1.6523 | 0.00000 |
| 304 | 1.6864 | 0.00000 |
| 305 | 1.7581 | 0.00000 |

|     |        |         |
|-----|--------|---------|
| 306 | 1.7730 | 0.00000 |
| 307 | 1.8771 | 0.00000 |
| 308 | 1.8994 | 0.00000 |
| 309 | 1.9076 | 0.00000 |
| 310 | 1.9210 | 0.00000 |
| 311 | 2.1390 | 0.00000 |
| 312 | 2.1984 | 0.00000 |
| 313 | 2.2198 | 0.00000 |
| 314 | 2.2532 | 0.00000 |
| 315 | 2.2892 | 0.00000 |
| 316 | 2.2964 | 0.00000 |
| 317 | 2.3366 | 0.00000 |
| 318 | 2.3609 | 0.00000 |
| 319 | 2.3827 | 0.00000 |
| 320 | 2.4080 | 0.00000 |
| 321 | 2.4283 | 0.00000 |
| 322 | 2.4352 | 0.00000 |
| 323 | 2.4503 | 0.00000 |
| 324 | 2.4579 | 0.00000 |
| 325 | 2.4670 | 0.00000 |
| 326 | 2.5257 | 0.00000 |
| 327 | 2.5437 | 0.00000 |

|     |        |         |
|-----|--------|---------|
| 328 | 2.7060 | 0.00000 |
| 329 | 2.7344 | 0.00000 |
| 330 | 2.7530 | 0.00000 |
| 331 | 2.7589 | 0.00000 |
| 332 | 2.7734 | 0.00000 |
| 333 | 2.8289 | 0.00000 |
| 334 | 2.8465 | 0.00000 |
| 335 | 2.8721 | 0.00000 |
| 336 | 2.9022 | 0.00000 |
| 337 | 2.9325 | 0.00000 |
| 338 | 2.9557 | 0.00000 |
| 339 | 2.9835 | 0.00000 |
| 340 | 3.0068 | 0.00000 |
| 341 | 3.0382 | 0.00000 |
| 342 | 3.0504 | 0.00000 |
| 343 | 3.0717 | 0.00000 |
| 344 | 3.0921 | 0.00000 |
| 345 | 3.1528 | 0.00000 |
| 346 | 3.1704 | 0.00000 |
| 347 | 3.1882 | 0.00000 |
| 348 | 3.1995 | 0.00000 |
| 349 | 3.3065 | 0.00000 |

|     |        |         |
|-----|--------|---------|
| 350 | 3.3273 | 0.00000 |
| 351 | 3.3607 | 0.00000 |
| 352 | 3.3707 | 0.00000 |
| 353 | 3.3922 | 0.00000 |
| 354 | 3.4372 | 0.00000 |
| 355 | 3.4818 | 0.00000 |
| 356 | 3.4916 | 0.00000 |
| 357 | 3.4938 | 0.00000 |
| 358 | 3.5045 | 0.00000 |
| 359 | 3.6385 | 0.00000 |
| 360 | 3.6764 | 0.00000 |
| 361 | 3.7003 | 0.00000 |
| 362 | 3.7380 | 0.00000 |
| 363 | 3.7547 | 0.00000 |
| 364 | 3.7604 | 0.00000 |
| 365 | 3.7772 | 0.00000 |
| 366 | 3.7985 | 0.00000 |
| 367 | 3.8145 | 0.00000 |
| 368 | 3.8407 | 0.00000 |
| 369 | 3.8472 | 0.00000 |
| 370 | 3.8659 | 0.00000 |
| 371 | 3.8800 | 0.00000 |

|     |        |         |
|-----|--------|---------|
| 372 | 3.8929 | 0.00000 |
| 373 | 3.9209 | 0.00000 |
| 374 | 3.9353 | 0.00000 |
| 375 | 3.9481 | 0.00000 |
| 376 | 3.9591 | 0.00000 |
| 377 | 3.9825 | 0.00000 |
| 378 | 3.9864 | 0.00000 |
| 379 | 4.0219 | 0.00000 |
| 380 | 4.0774 | 0.00000 |
| 381 | 4.1709 | 0.00000 |
| 382 | 4.2586 | 0.00000 |
| 383 | 4.2622 | 0.00000 |
| 384 | 4.2690 | 0.00000 |
| 385 | 4.2928 | 0.00000 |
| 386 | 4.3211 | 0.00000 |
| 387 | 4.3338 | 0.00000 |
| 388 | 4.3502 | 0.00000 |
| 389 | 4.3807 | 0.00000 |
| 390 | 4.3856 | 0.00000 |
| 391 | 4.4231 | 0.00000 |
| 392 | 4.4487 | 0.00000 |
| 393 | 4.4740 | 0.00000 |

|     |        |         |
|-----|--------|---------|
| 394 | 4.4827 | 0.00000 |
| 395 | 4.4923 | 0.00000 |
| 396 | 4.4991 | 0.00000 |
| 397 | 4.5203 | 0.00000 |
| 398 | 4.5550 | 0.00000 |
| 399 | 4.5929 | 0.00000 |
| 400 | 4.6104 | 0.00000 |
| 401 | 4.6288 | 0.00000 |
| 402 | 4.6456 | 0.00000 |
| 403 | 4.6595 | 0.00000 |
| 404 | 4.6852 | 0.00000 |
| 405 | 4.7086 | 0.00000 |
| 406 | 4.7369 | 0.00000 |
| 407 | 4.7514 | 0.00000 |
| 408 | 4.7703 | 0.00000 |
| 409 | 4.7868 | 0.00000 |
| 410 | 4.7889 | 0.00000 |
| 411 | 4.8028 | 0.00000 |
| 412 | 4.8328 | 0.00000 |
| 413 | 4.8682 | 0.00000 |
| 414 | 4.8848 | 0.00000 |
| 415 | 4.9027 | 0.00000 |

|     |        |         |
|-----|--------|---------|
| 416 | 4.9417 | 0.00000 |
| 417 | 4.9937 | 0.00000 |
| 418 | 5.0096 | 0.00000 |
| 419 | 5.0130 | 0.00000 |
| 420 | 5.0383 | 0.00000 |
| 421 | 5.0441 | 0.00000 |
| 422 | 5.0682 | 0.00000 |
| 423 | 5.0858 | 0.00000 |
| 424 | 5.1175 | 0.00000 |
| 425 | 5.1216 | 0.00000 |
| 426 | 5.1409 | 0.00000 |
| 427 | 5.1439 | 0.00000 |
| 428 | 5.1698 | 0.00000 |
| 429 | 5.1794 | 0.00000 |
| 430 | 5.1884 | 0.00000 |
| 431 | 5.1926 | 0.00000 |
| 432 | 5.2197 | 0.00000 |
| 433 | 5.2375 | 0.00000 |
| 434 | 5.2434 | 0.00000 |
| 435 | 5.2611 | 0.00000 |
| 436 | 5.2978 | 0.00000 |
| 437 | 5.3025 | 0.00000 |

|     |        |         |
|-----|--------|---------|
| 438 | 5.3118 | 0.00000 |
| 439 | 5.3358 | 0.00000 |
| 440 | 5.3528 | 0.00000 |
| 441 | 5.3706 | 0.00000 |
| 442 | 5.3812 | 0.00000 |
| 443 | 5.3949 | 0.00000 |
| 444 | 5.4289 | 0.00000 |
| 445 | 5.4594 | 0.00000 |
| 446 | 5.4692 | 0.00000 |
| 447 | 5.4871 | 0.00000 |
| 448 | 5.4990 | 0.00000 |
| 449 | 5.5256 | 0.00000 |
| 450 | 5.5676 | 0.00000 |
| 451 | 5.5726 | 0.00000 |
| 452 | 5.5943 | 0.00000 |
| 453 | 5.6074 | 0.00000 |
| 454 | 5.6246 | 0.00000 |
| 455 | 5.6700 | 0.00000 |
| 456 | 5.6921 | 0.00000 |
| 457 | 5.7181 | 0.00000 |
| 458 | 5.7268 | 0.00000 |
| 459 | 5.7479 | 0.00000 |

|     |        |         |
|-----|--------|---------|
| 460 | 5.7622 | 0.00000 |
| 461 | 5.7892 | 0.00000 |
| 462 | 5.7921 | 0.00000 |
| 463 | 5.7977 | 0.00000 |
| 464 | 5.8038 | 0.00000 |
| 465 | 5.8200 | 0.00000 |
| 466 | 5.8253 | 0.00000 |
| 467 | 5.8549 | 0.00000 |
| 468 | 5.8607 | 0.00000 |
| 469 | 5.8816 | 0.00000 |
| 470 | 5.8864 | 0.00000 |
| 471 | 5.8908 | 0.00000 |
| 472 | 5.9074 | 0.00000 |
| 473 | 5.9209 | 0.00000 |
| 474 | 5.9472 | 0.00000 |
| 475 | 5.9537 | 0.00000 |
| 476 | 5.9702 | 0.00000 |
| 477 | 5.9772 | 0.00000 |
| 478 | 5.9950 | 0.00000 |
| 479 | 6.0159 | 0.00000 |
| 480 | 6.0491 | 0.00000 |

-----

soft charge-density along one line, spin component 1

0 1 2 3 4 5 6 7

8 9

total charge-density along one line

soft charge-density along one line, spin component 2

0 1 2 3 4 5 6 7

8 9

total charge-density along one line

pseudopotential strength for first ion, spin component: 1

-2.331 -4.014 -0.002 0.000 0.000

-4.014 -6.828 -0.006 0.000 -0.000

-0.002 -0.006 -0.336 -0.000 0.000

0.000 0.000 -0.000 -0.341 -0.000

0.000 -0.000 0.000 -0.000 -0.341

pseudopotential strength for first ion, spin component: 2

-2.331 -4.014 -0.002 0.000 0.000

-4.014 -6.828 -0.006 0.000 -0.000

-0.002 -0.006 -0.336 -0.000 0.000

0.000 0.000 -0.000 -0.341 -0.000

0.000 -0.000 0.000 -0.000 -0.341

total augmentation occupancy for first ion, spin component: 1

3.579 -0.646 0.444 -0.034 -0.000

-0.646 0.130 -0.082 0.006 0.000

0.444 -0.082 0.056 -0.003 -0.000

-0.034 0.006 -0.003 0.011 0.000

-0.000 0.000 -0.000 0.000 0.007

total augmentation occupancy for first ion, spin component: 2

-0.000 0.000 -0.000 0.000 0.000

0.000 -0.000 0.000 -0.000 -0.000

-0.000 0.000 -0.000 -0.000 -0.000

0.000 -0.000 -0.000 -0.000 -0.000

0.000 -0.000 -0.000 -0.000 -0.000

----- aborting loop because EDIFF is reached -----

total charge

| # of ion | s     | p     | d     | tot   |
|----------|-------|-------|-------|-------|
| 1        | 0.646 | 0.043 | 0.000 | 0.690 |
| 2        | 0.646 | 0.043 | 0.000 | 0.690 |
| 3        | 0.646 | 0.043 | 0.000 | 0.690 |
| 4        | 0.646 | 0.043 | 0.000 | 0.690 |
| 5        | 0.646 | 0.043 | 0.000 | 0.690 |
| 6        | 0.646 | 0.043 | 0.000 | 0.690 |
| 7        | 0.646 | 0.043 | 0.000 | 0.690 |
| 8        | 0.646 | 0.043 | 0.000 | 0.690 |
| 9        | 0.646 | 0.043 | 0.000 | 0.690 |
| 10       | 0.646 | 0.043 | 0.000 | 0.690 |
| 11       | 0.646 | 0.043 | 0.000 | 0.690 |
| 12       | 0.646 | 0.043 | 0.000 | 0.690 |
| 13       | 0.646 | 0.043 | 0.000 | 0.689 |
| 14       | 0.646 | 0.043 | 0.000 | 0.689 |
| 15       | 0.648 | 0.045 | 0.000 | 0.693 |
| 16       | 0.646 | 0.043 | 0.000 | 0.689 |

|    |       |       |       |       |
|----|-------|-------|-------|-------|
| 17 | 0.646 | 0.043 | 0.000 | 0.689 |
| 18 | 0.646 | 0.043 | 0.000 | 0.689 |
| 19 | 0.646 | 0.043 | 0.000 | 0.689 |
| 20 | 0.646 | 0.043 | 0.000 | 0.689 |
| 21 | 0.646 | 0.043 | 0.000 | 0.689 |
| 22 | 0.646 | 0.044 | 0.000 | 0.690 |
| 23 | 0.541 | 0.015 | 0.000 | 0.557 |
| 24 | 0.541 | 0.015 | 0.000 | 0.556 |
| 25 | 0.870 | 1.763 | 0.000 | 2.633 |
| 26 | 0.867 | 1.785 | 0.000 | 2.653 |
| 27 | 0.867 | 1.786 | 0.000 | 2.653 |
| 28 | 0.870 | 1.762 | 0.000 | 2.632 |
| 29 | 0.865 | 1.783 | 0.000 | 2.648 |
| 30 | 0.870 | 1.763 | 0.000 | 2.633 |
| 31 | 0.867 | 1.786 | 0.000 | 2.653 |
| 32 | 0.867 | 1.786 | 0.000 | 2.653 |
| 33 | 0.870 | 1.762 | 0.000 | 2.632 |
| 34 | 0.865 | 1.783 | 0.000 | 2.648 |
| 35 | 0.870 | 1.763 | 0.000 | 2.633 |
| 36 | 0.868 | 1.787 | 0.000 | 2.654 |
| 37 | 0.867 | 1.786 | 0.000 | 2.653 |
| 38 | 0.870 | 1.763 | 0.000 | 2.633 |

|    |       |       |       |       |
|----|-------|-------|-------|-------|
| 39 | 0.865 | 1.784 | 0.000 | 2.649 |
| 40 | 0.870 | 1.763 | 0.000 | 2.633 |
| 41 | 0.868 | 1.787 | 0.000 | 2.655 |
| 42 | 0.867 | 1.786 | 0.000 | 2.653 |
| 43 | 0.871 | 1.764 | 0.000 | 2.634 |
| 44 | 0.865 | 1.783 | 0.000 | 2.648 |
| 45 | 0.870 | 1.763 | 0.000 | 2.633 |
| 46 | 0.867 | 1.786 | 0.000 | 2.653 |
| 47 | 0.867 | 1.786 | 0.000 | 2.653 |
| 48 | 0.871 | 1.763 | 0.000 | 2.634 |
| 49 | 0.865 | 1.783 | 0.000 | 2.648 |
| 50 | 0.870 | 1.763 | 0.000 | 2.633 |
| 51 | 0.867 | 1.786 | 0.000 | 2.653 |
| 52 | 0.867 | 1.786 | 0.000 | 2.653 |
| 53 | 0.870 | 1.762 | 0.000 | 2.632 |
| 54 | 0.865 | 1.784 | 0.000 | 2.648 |
| 55 | 0.865 | 1.784 | 0.000 | 2.649 |
| 56 | 0.865 | 1.786 | 0.000 | 2.651 |
| 57 | 0.866 | 1.787 | 0.000 | 2.653 |
| 58 | 0.866 | 1.790 | 0.000 | 2.656 |
| 59 | 0.865 | 1.786 | 0.000 | 2.651 |
| 60 | 0.866 | 1.786 | 0.000 | 2.651 |

|    |       |       |       |       |
|----|-------|-------|-------|-------|
| 61 | 0.866 | 1.788 | 0.000 | 2.654 |
| 62 | 0.867 | 1.791 | 0.000 | 2.658 |
| 63 | 0.865 | 1.784 | 0.000 | 2.649 |
| 64 | 0.865 | 1.786 | 0.000 | 2.651 |
| 65 | 0.866 | 1.787 | 0.000 | 2.652 |
| 66 | 0.865 | 1.788 | 0.000 | 2.653 |
| 67 | 0.865 | 1.786 | 0.000 | 2.651 |
| 68 | 0.866 | 1.785 | 0.000 | 2.651 |
| 69 | 0.865 | 1.787 | 0.000 | 2.652 |
| 70 | 0.866 | 1.787 | 0.000 | 2.653 |
| 71 | 0.865 | 1.784 | 0.000 | 2.649 |
| 72 | 0.865 | 1.786 | 0.000 | 2.651 |
| 73 | 0.866 | 1.786 | 0.000 | 2.652 |
| 74 | 0.864 | 1.785 | 0.000 | 2.649 |
| 75 | 0.865 | 1.786 | 0.000 | 2.651 |
| 76 | 0.866 | 1.786 | 0.000 | 2.651 |
| 77 | 0.865 | 1.786 | 0.000 | 2.651 |
| 78 | 0.865 | 1.784 | 0.000 | 2.649 |
| 79 | 0.865 | 1.784 | 0.000 | 2.649 |
| 80 | 0.865 | 1.786 | 0.000 | 2.651 |
| 81 | 0.865 | 1.785 | 0.000 | 2.650 |
| 82 | 0.863 | 1.782 | 0.000 | 2.645 |

|     |       |       |       |       |
|-----|-------|-------|-------|-------|
| 83  | 0.865 | 1.786 | 0.000 | 2.651 |
| 84  | 0.866 | 1.786 | 0.000 | 2.651 |
| 85  | 0.865 | 1.784 | 0.000 | 2.648 |
| 86  | 0.862 | 1.774 | 0.000 | 2.636 |
| 87  | 0.865 | 1.784 | 0.000 | 2.649 |
| 88  | 0.865 | 1.787 | 0.000 | 2.652 |
| 89  | 0.865 | 1.785 | 0.000 | 2.650 |
| 90  | 0.865 | 1.788 | 0.000 | 2.653 |
| 91  | 0.865 | 1.786 | 0.000 | 2.651 |
| 92  | 0.866 | 1.786 | 0.000 | 2.651 |
| 93  | 0.864 | 1.783 | 0.000 | 2.647 |
| 94  | 0.866 | 1.785 | 0.000 | 2.651 |
| 95  | 0.865 | 1.784 | 0.000 | 2.649 |
| 96  | 0.865 | 1.786 | 0.000 | 2.651 |
| 97  | 0.866 | 1.787 | 0.000 | 2.653 |
| 98  | 0.866 | 1.789 | 0.000 | 2.655 |
| 99  | 0.865 | 1.786 | 0.000 | 2.651 |
| 100 | 0.866 | 1.786 | 0.000 | 2.651 |
| 101 | 0.865 | 1.787 | 0.000 | 2.652 |
| 102 | 0.867 | 1.790 | 0.000 | 2.657 |
| 103 | 0.865 | 1.786 | 0.000 | 2.651 |
| 104 | 0.867 | 1.785 | 0.000 | 2.653 |

|     |       |       |       |       |
|-----|-------|-------|-------|-------|
| 105 | 0.866 | 1.786 | 0.000 | 2.652 |
| 106 | 0.870 | 1.778 | 0.000 | 2.648 |
| 107 | 0.869 | 1.765 | 0.000 | 2.635 |
| 108 | 0.865 | 1.783 | 0.000 | 2.648 |
| 109 | 0.869 | 1.789 | 0.000 | 2.658 |
| 110 | 0.865 | 1.786 | 0.000 | 2.651 |
| 111 | 0.867 | 1.785 | 0.000 | 2.653 |
| 112 | 0.867 | 1.789 | 0.000 | 2.655 |
| 113 | 0.871 | 1.782 | 0.000 | 2.653 |
| 114 | 0.869 | 1.765 | 0.000 | 2.634 |
| 115 | 0.865 | 1.783 | 0.000 | 2.648 |
| 116 | 0.870 | 1.791 | 0.000 | 2.661 |
| 117 | 0.865 | 1.786 | 0.000 | 2.651 |
| 118 | 0.867 | 1.786 | 0.000 | 2.653 |
| 119 | 0.865 | 1.782 | 0.000 | 2.647 |
| 120 | 0.857 | 1.707 | 0.000 | 2.564 |
| 121 | 0.869 | 1.765 | 0.000 | 2.634 |
| 122 | 0.865 | 1.783 | 0.000 | 2.648 |
| 123 | 0.866 | 1.778 | 0.000 | 2.644 |
| 124 | 0.866 | 1.786 | 0.000 | 2.652 |
| 125 | 0.867 | 1.785 | 0.000 | 2.653 |
| 126 | 0.862 | 1.776 | 0.000 | 2.638 |

|     |       |       |       |       |
|-----|-------|-------|-------|-------|
| 127 | 0.849 | 1.830 | 0.000 | 2.679 |
| 128 | 0.870 | 1.767 | 0.000 | 2.637 |
| 129 | 0.865 | 1.783 | 0.000 | 2.648 |
| 130 | 0.860 | 1.757 | 0.000 | 2.617 |
| 131 | 0.866 | 1.786 | 0.000 | 2.652 |
| 132 | 0.867 | 1.784 | 0.000 | 2.652 |
| 133 | 0.864 | 1.787 | 0.000 | 2.651 |
| 134 | 0.869 | 1.789 | 0.000 | 2.659 |
| 135 | 0.869 | 1.767 | 0.000 | 2.636 |
| 136 | 0.865 | 1.783 | 0.000 | 2.648 |
| 137 | 0.866 | 1.772 | 0.000 | 2.638 |
| 138 | 0.866 | 1.786 | 0.000 | 2.652 |
| 139 | 0.867 | 1.785 | 0.000 | 2.652 |
| 140 | 0.866 | 1.788 | 0.000 | 2.654 |
| 141 | 0.870 | 1.779 | 0.000 | 2.649 |
| 142 | 0.869 | 1.766 | 0.000 | 2.635 |
| 143 | 0.865 | 1.783 | 0.000 | 2.648 |
| 144 | 0.869 | 1.790 | 0.000 | 2.659 |
| 145 | 0.941 | 1.716 | 0.000 | 2.657 |
| 146 | 1.240 | 1.546 | 0.074 | 2.860 |
| 147 | 1.633 | 3.524 | 0.000 | 5.157 |

-----

tot            123.061 221.544    0.074 344.679

magnetization (x)

| # of ion | s      | p      | d     | tot    |
|----------|--------|--------|-------|--------|
| 1        | 0.000  | -0.000 | 0.000 | 0.000  |
| 2        | -0.000 | 0.000  | 0.000 | -0.000 |
| 3        | 0.000  | -0.000 | 0.000 | 0.000  |
| 4        | -0.000 | 0.000  | 0.000 | -0.000 |
| 5        | 0.000  | -0.000 | 0.000 | 0.000  |
| 6        | -0.000 | 0.000  | 0.000 | -0.000 |
| 7        | 0.000  | -0.000 | 0.000 | 0.000  |
| 8        | -0.000 | 0.000  | 0.000 | -0.000 |
| 9        | 0.000  | -0.000 | 0.000 | 0.000  |
| 10       | -0.000 | 0.000  | 0.000 | -0.000 |
| 11       | 0.000  | -0.000 | 0.000 | 0.000  |
| 12       | -0.000 | 0.000  | 0.000 | -0.000 |
| 13       | 0.000  | -0.000 | 0.000 | 0.000  |
| 14       | -0.004 | 0.002  | 0.000 | -0.002 |

|    |        |        |       |        |
|----|--------|--------|-------|--------|
| 15 | 0.000  | -0.000 | 0.000 | 0.000  |
| 16 | -0.004 | 0.002  | 0.000 | -0.002 |
| 17 | -0.004 | 0.002  | 0.000 | -0.002 |
| 18 | 0.000  | -0.000 | 0.000 | 0.000  |
| 19 | -0.003 | 0.001  | 0.000 | -0.002 |
| 20 | 0.000  | -0.000 | 0.000 | 0.000  |
| 21 | -0.003 | 0.002  | 0.000 | -0.002 |
| 22 | -0.003 | 0.002  | 0.000 | -0.002 |
| 23 | -0.000 | 0.000  | 0.000 | -0.000 |
| 24 | -0.000 | 0.000  | 0.000 | -0.000 |
| 25 | -0.000 | -0.007 | 0.000 | -0.008 |
| 26 | -0.000 | -0.002 | 0.000 | -0.002 |
| 27 | 0.000  | 0.003  | 0.000 | 0.003  |
| 28 | 0.000  | 0.005  | 0.000 | 0.005  |
| 29 | 0.000  | 0.003  | 0.000 | 0.003  |
| 30 | -0.000 | -0.007 | 0.000 | -0.008 |
| 31 | -0.000 | -0.002 | 0.000 | -0.002 |
| 32 | 0.000  | 0.003  | 0.000 | 0.003  |
| 33 | 0.000  | 0.005  | 0.000 | 0.005  |
| 34 | 0.000  | 0.002  | 0.000 | 0.002  |
| 35 | -0.000 | -0.007 | 0.000 | -0.008 |
| 36 | -0.000 | -0.002 | 0.000 | -0.002 |

|    |        |        |       |        |
|----|--------|--------|-------|--------|
| 37 | 0.000  | 0.003  | 0.000 | 0.003  |
| 38 | 0.000  | 0.006  | 0.000 | 0.007  |
| 39 | 0.000  | 0.002  | 0.000 | 0.002  |
| 40 | -0.000 | -0.007 | 0.000 | -0.008 |
| 41 | -0.000 | -0.002 | 0.000 | -0.002 |
| 42 | 0.000  | 0.002  | 0.000 | 0.003  |
| 43 | 0.000  | 0.005  | 0.000 | 0.006  |
| 44 | 0.000  | 0.004  | 0.000 | 0.004  |
| 45 | -0.000 | -0.007 | 0.000 | -0.008 |
| 46 | -0.000 | -0.002 | 0.000 | -0.002 |
| 47 | 0.000  | 0.003  | 0.000 | 0.003  |
| 48 | 0.000  | 0.005  | 0.000 | 0.006  |
| 49 | 0.000  | 0.001  | 0.000 | 0.002  |
| 50 | -0.000 | -0.007 | 0.000 | -0.008 |
| 51 | -0.000 | -0.002 | 0.000 | -0.002 |
| 52 | 0.000  | 0.002  | 0.000 | 0.003  |
| 53 | 0.000  | 0.006  | 0.000 | 0.007  |
| 54 | 0.000  | 0.002  | 0.000 | 0.002  |
| 55 | -0.000 | -0.005 | 0.000 | -0.006 |
| 56 | -0.000 | -0.007 | 0.000 | -0.007 |
| 57 | -0.000 | -0.001 | 0.000 | -0.001 |
| 58 | -0.000 | -0.001 | 0.000 | -0.001 |

|    |        |        |       |        |
|----|--------|--------|-------|--------|
| 59 | 0.000  | 0.006  | 0.000 | 0.007  |
| 60 | 0.000  | 0.003  | 0.000 | 0.003  |
| 61 | 0.000  | 0.001  | 0.000 | 0.001  |
| 62 | 0.000  | 0.003  | 0.000 | 0.003  |
| 63 | -0.000 | -0.005 | 0.000 | -0.006 |
| 64 | -0.000 | -0.007 | 0.000 | -0.007 |
| 65 | -0.000 | -0.001 | 0.000 | -0.001 |
| 66 | -0.000 | -0.001 | 0.000 | -0.001 |
| 67 | 0.000  | 0.006  | 0.000 | 0.006  |
| 68 | 0.000  | 0.003  | 0.000 | 0.003  |
| 69 | 0.000  | 0.001  | 0.000 | 0.001  |
| 70 | 0.000  | 0.002  | 0.000 | 0.002  |
| 71 | -0.000 | -0.005 | 0.000 | -0.006 |
| 72 | -0.000 | -0.007 | 0.000 | -0.007 |
| 73 | -0.000 | -0.001 | 0.000 | -0.001 |
| 74 | -0.000 | -0.002 | 0.000 | -0.002 |
| 75 | 0.000  | 0.006  | 0.000 | 0.007  |
| 76 | 0.000  | 0.003  | 0.000 | 0.004  |
| 77 | 0.000  | 0.003  | 0.000 | 0.003  |
| 78 | 0.000  | 0.001  | 0.000 | 0.001  |
| 79 | -0.000 | -0.005 | 0.000 | -0.006 |
| 80 | -0.000 | -0.007 | 0.000 | -0.007 |

|     |        |        |       |        |
|-----|--------|--------|-------|--------|
| 81  | -0.000 | -0.001 | 0.000 | -0.002 |
| 82  | -0.000 | -0.002 | 0.000 | -0.002 |
| 83  | 0.001  | 0.007  | 0.000 | 0.008  |
| 84  | 0.000  | 0.003  | 0.000 | 0.003  |
| 85  | 0.000  | 0.002  | 0.000 | 0.002  |
| 86  | 0.000  | 0.005  | 0.000 | 0.006  |
| 87  | -0.000 | -0.005 | 0.000 | -0.005 |
| 88  | -0.000 | -0.007 | 0.000 | -0.007 |
| 89  | -0.000 | -0.001 | 0.000 | -0.002 |
| 90  | -0.000 | -0.002 | 0.000 | -0.002 |
| 91  | 0.001  | 0.008  | 0.000 | 0.008  |
| 92  | 0.000  | 0.003  | 0.000 | 0.003  |
| 93  | 0.000  | 0.002  | 0.000 | 0.003  |
| 94  | 0.000  | 0.001  | 0.000 | 0.001  |
| 95  | -0.000 | -0.005 | 0.000 | -0.006 |
| 96  | -0.000 | -0.007 | 0.000 | -0.007 |
| 97  | -0.000 | -0.001 | 0.000 | -0.001 |
| 98  | -0.000 | -0.001 | 0.000 | -0.001 |
| 99  | 0.001  | 0.007  | 0.000 | 0.007  |
| 100 | 0.000  | 0.003  | 0.000 | 0.004  |
| 101 | 0.000  | 0.003  | 0.000 | 0.003  |
| 102 | 0.000  | 0.002  | 0.000 | 0.002  |

|     |        |        |       |        |
|-----|--------|--------|-------|--------|
| 103 | -0.001 | -0.010 | 0.000 | -0.011 |
| 104 | -0.003 | -0.028 | 0.000 | -0.031 |
| 105 | -0.000 | -0.001 | 0.000 | -0.002 |
| 106 | -0.000 | -0.004 | 0.000 | -0.005 |
| 107 | 0.007  | 0.116  | 0.000 | 0.122  |
| 108 | 0.001  | 0.010  | 0.000 | 0.011  |
| 109 | 0.000  | 0.001  | 0.000 | 0.001  |
| 110 | -0.001 | -0.010 | 0.000 | -0.011 |
| 111 | -0.003 | -0.028 | 0.000 | -0.031 |
| 112 | -0.000 | -0.001 | 0.000 | -0.002 |
| 113 | -0.000 | -0.003 | 0.000 | -0.004 |
| 114 | 0.007  | 0.120  | 0.000 | 0.127  |
| 115 | 0.001  | 0.010  | 0.000 | 0.011  |
| 116 | 0.000  | 0.001  | 0.000 | 0.002  |
| 117 | -0.001 | -0.010 | 0.000 | -0.011 |
| 118 | -0.003 | -0.026 | 0.000 | -0.029 |
| 119 | -0.000 | -0.002 | 0.000 | -0.002 |
| 120 | -0.000 | -0.002 | 0.000 | -0.002 |
| 121 | 0.007  | 0.115  | 0.000 | 0.122  |
| 122 | 0.001  | 0.010  | 0.000 | 0.010  |
| 123 | 0.000  | 0.003  | 0.000 | 0.003  |
| 124 | -0.001 | -0.010 | 0.000 | -0.011 |

|     |        |        |        |        |
|-----|--------|--------|--------|--------|
| 125 | -0.003 | -0.024 | 0.000  | -0.027 |
| 126 | -0.000 | -0.002 | 0.000  | -0.002 |
| 127 | -0.000 | 0.001  | 0.000  | 0.001  |
| 128 | 0.006  | 0.105  | 0.000  | 0.111  |
| 129 | 0.001  | 0.009  | 0.000  | 0.010  |
| 130 | 0.000  | 0.004  | 0.000  | 0.004  |
| 131 | -0.001 | -0.009 | 0.000  | -0.010 |
| 132 | -0.003 | -0.024 | 0.000  | -0.027 |
| 133 | -0.000 | -0.002 | 0.000  | -0.002 |
| 134 | -0.000 | -0.002 | 0.000  | -0.002 |
| 135 | 0.006  | 0.097  | 0.000  | 0.102  |
| 136 | 0.001  | 0.009  | 0.000  | 0.010  |
| 137 | 0.000  | 0.004  | 0.000  | 0.005  |
| 138 | -0.001 | -0.010 | 0.000  | -0.011 |
| 139 | -0.003 | -0.026 | 0.000  | -0.029 |
| 140 | -0.000 | -0.002 | 0.000  | -0.002 |
| 141 | -0.000 | -0.003 | 0.000  | -0.004 |
| 142 | 0.006  | 0.105  | 0.000  | 0.111  |
| 143 | 0.001  | 0.010  | 0.000  | 0.010  |
| 144 | 0.000  | 0.002  | 0.000  | 0.003  |
| 145 | 0.000  | 0.005  | 0.000  | 0.006  |
| 146 | -0.000 | 0.000  | -0.000 | 0.000  |

147            0.000   0.004   0.000   0.004

-----

tot            0.001   0.513   -0.000   0.514

CHARGE:    cpu time    0.5202: real time    0.5217

FORLOC:    cpu time    0.0199: real time    0.0200

FORNL :    cpu time    2.0656: real time    2.0734

STRESS:    cpu time    6.2093: real time    6.2301

FORCOR:    cpu time    0.1408: real time    0.1412

FORHAR:    cpu time    0.0332: real time    0.0333

MIXING:    cpu time    0.0102: real time    0.0102

OFIELD:    cpu time    0.0001: real time    0.0001

-----

DFTD3 V3.0 Rev 1

Edisp (eV)   -6.61780

E6    (eV):    -3.9313

E8    (eV):    -2.6865

% E8        : 40.60

FORVDW:    cpu time    1.5387: real time    1.5800

FORCE on cell =-STRESS in cart. coord. units (eV):

| Direction           | XX           | YY           | ZZ              | XY       | YZ          | ZX         |
|---------------------|--------------|--------------|-----------------|----------|-------------|------------|
| -----               |              |              |                 |          |             |            |
| Alpha Z             | 233.50077    | 233.50077    | 233.50077       |          |             |            |
| Ewald               | 107580.56416 | 23476.25992  | -39728.53249    | 12.81117 | 3454.40125  | 130.01950  |
| Hartree             | 106097.84647 | 25032.29041  | -23795.13714    | -5.61600 | 2947.16446  | 93.56749   |
| E(xc)               | -1914.22256  | -1916.57845  | -1979.88707     | 0.14252  | 1.82064     | 0.13697    |
| Local               | *****        | -53957.14430 | 57017.43389     | -3.50925 | -6359.69187 | -219.96202 |
| n-local             | -472.65215   | -482.43338   | -439.52334      | -0.74008 | -0.68555    | -0.35685   |
| augment             | -38.29444    | -38.58728    | -34.30652       | -0.00145 | -0.97752    | -0.00638   |
| Kinetic             | 7635.00902   | 7638.78787   | 8713.93626      | -3.33509 | -41.57385   | -3.36746   |
| Fock                | 0.00000      | 0.00000      | 0.00000         | 0.00000  | 0.00000     | 0.00000    |
| vdW                 | -2.64308     | -1.49218     | -6.59370        | 0.00143  | -0.07450    | 0.01086    |
| -----               |              |              |                 |          |             |            |
| Total               | -17.75778    | -15.39663    | -19.10934       | -0.24675 | 0.38306     | 0.04210    |
| in kB               | -4.89681     | -4.24571     | -5.26951        | -0.06804 | 0.10563     | 0.01161    |
| external pressure = |              | -4.80 kB     | Pullay stress = |          | 0.00 kB     |            |

VOLUME and BASIS-vectors are now :

-----

energy-cutoff : 400.00

volume of cell : 5810.14

direct lattice vectors

reciprocal lattice vectors

|              |              |              |             |             |             |
|--------------|--------------|--------------|-------------|-------------|-------------|
| 14.780600000 | 0.000000000  | 0.000000000  | 0.067656252 | 0.000000000 | 0.000000000 |
| 0.000000000  | 21.333900000 | 0.000000000  | 0.000000000 | 0.046873755 | 0.000000000 |
| 0.000000000  | 0.000000000  | 18.425700000 | 0.000000000 | 0.000000000 | 0.054272022 |

length of vectors

|              |              |              |             |             |             |
|--------------|--------------|--------------|-------------|-------------|-------------|
| 14.780600000 | 21.333900000 | 18.425700000 | 0.067656252 | 0.046873755 | 0.054272022 |
|--------------|--------------|--------------|-------------|-------------|-------------|

FORCES acting on ions

electron-ion (+dipol)

ewald-force

non-local-force

convergence-correction

-----

|           |           |           |           |           |           |           |           |   |
|-----------|-----------|-----------|-----------|-----------|-----------|-----------|-----------|---|
| 0.409E-02 | 0.154E+03 | 0.361E+02 | -.260E-02 | -.160E+03 | -.357E+02 | -.180E-02 | 0.566E+01 | - |
| .438E+00  | 0.115E-06 | 0.473E-06 | -.130E-06 |           |           |           |           |   |
| -.193E-01 | 0.155E+03 | -.340E+02 | 0.169E-01 | -.160E+03 | 0.335E+02 | 0.116E-02 | 0.565E+01 |   |
| 0.541E+00 | -.344E-06 | 0.355E-06 | -.598E-06 |           |           |           |           |   |
| 0.184E+00 | 0.154E+03 | 0.360E+02 | -.184E+00 | -.160E+03 | -.356E+02 | 0.945E-05 | 0.565E+01 | - |
| .443E+00  | -.875E-07 | 0.439E-06 | -.690E-07 |           |           |           |           |   |
| 0.111E+00 | 0.155E+03 | -.341E+02 | -.980E-01 | -.160E+03 | 0.336E+02 | -.175E-01 | 0.565E+01 |   |

0.535E+00 0.495E-06 0.297E-06 -.563E-06  
0.171E+00 0.154E+03 0.362E+02 -.173E+00 -.160E+03 -.357E+02 0.116E-02 0.566E+01 -  
.440E+00 -.247E-06 0.281E-06 0.613E-06  
0.126E+00 0.154E+03 -.340E+02 -.108E+00 -.160E+03 0.334E+02 -.211E-01 0.565E+01  
0.541E+00 0.708E-06 -.328E-06 0.235E-06  
-.187E-01 0.154E+03 0.363E+02 0.176E-01 -.160E+03 -.359E+02 0.159E-02 0.566E+01 -  
.431E+00 -.151E-06 0.141E-06 0.123E-05  
-.120E-01 0.154E+03 -.338E+02 0.189E-01 -.160E+03 0.332E+02 -.721E-02 0.565E+01  
0.555E+00 0.268E-06 -.849E-06 0.925E-06  
-.181E+00 0.154E+03 0.363E+02 0.181E+00 -.160E+03 -.359E+02 0.254E-03 0.566E+01 -  
.429E+00 0.128E-06 0.205E-06 0.117E-05  
-.127E+00 0.155E+03 -.337E+02 0.114E+00 -.160E+03 0.331E+02 0.109E-01 0.565E+01  
0.561E+00 -.390E-06 -.789E-06 0.885E-06  
-.174E+00 0.154E+03 0.362E+02 0.176E+00 -.160E+03 -.358E+02 -.177E-02 0.566E+01 -  
.432E+00 0.243E-06 0.328E-06 0.509E-06  
-.115E+00 0.155E+03 -.338E+02 0.958E-01 -.160E+03 0.332E+02 0.192E-01 0.565E+01  
0.555E+00 -.741E-06 -.253E-06 0.140E-06  
0.227E+01 -.150E+03 -.386E+02 -.226E+01 0.156E+03 0.386E+02 -.103E-01 -.566E+01  
0.767E-01 0.139E-06 -.643E-06 -.223E-06  
-.419E+00 -.151E+03 0.388E+02 0.420E+00 0.157E+03 -.386E+02 -.128E-02 -.567E+01 -  
.269E+00 0.160E-06 -.229E-06 0.123E-06  
0.136E+02 -.146E+03 -.413E+02 -.138E+02 0.151E+03 0.413E+02 0.257E+00 -.567E+01 -

.348E-01 0.186E-06 -.678E-06 -.602E-06  
0.162E+01 -.151E+03 0.402E+02 -.162E+01 0.156E+03 -.400E+02 -.993E-03 -.567E+01 -  
.229E+00 0.754E-07 -.247E-06 0.654E-06  
0.352E+01 -.149E+03 0.443E+02 -.352E+01 0.155E+03 -.441E+02 -.197E-02 -.567E+01 -  
.180E+00 0.278E-06 -.471E-06 0.374E-06  
-.149E+02 -.146E+03 -.329E+02 0.150E+02 0.151E+03 0.329E+02 -.952E-01 -.566E+01  
0.482E-01 -.287E-06 -.756E-06 0.455E-06  
-.297E+01 -.149E+03 0.432E+02 0.296E+01 0.155E+03 -.430E+02 0.114E-01 -.567E+01 -  
.241E+00 -.407E-06 -.581E-06 -.997E-06  
-.381E+01 -.150E+03 -.385E+02 0.381E+01 0.156E+03 0.385E+02 -.611E-02 -.566E+01  
0.239E-01 0.579E-06 -.658E-06 -.236E-06  
-.207E+01 -.151E+03 0.395E+02 0.207E+01 0.156E+03 -.392E+02 0.151E-02 -.566E+01 -  
.282E+00 0.165E-06 -.516E-06 -.780E-06  
0.277E-02 -.148E+03 0.486E+02 0.490E-02 0.154E+03 -.484E+02 -.556E-02 -.569E+01 -  
.158E+00 -.224E-06 -.708E-06 -.258E-06  
0.196E+02 -.103E+03 0.222E+02 -.212E+02 0.103E+03 -.246E+02 0.153E+01 0.139E+00  
0.238E+01 0.137E-06 -.111E-05 0.521E-06  
-.191E+02 -.103E+03 0.153E+02 0.216E+02 0.103E+03 -.168E+02 -.241E+01 -.119E+00  
0.152E+01 -.936E-06 -.779E-06 0.154E-05  
0.696E-01 0.461E+03 0.202E+03 -.729E-01 -.462E+03 -.201E+03 0.384E-02 0.102E+01 -  
.219E+00 0.609E-06 0.963E-06 -.114E-05  
0.209E+00 0.353E+03 -.234E+03 -.209E+00 -.353E+03 0.234E+03 0.259E-02 0.443E+00 -

.370E-01 0.107E-06 0.215E-06 -.308E-05  
-.257E-01 0.351E+03 0.240E+03 0.244E-01 -.351E+03 -.241E+03 0.315E-02 0.408E+00  
0.564E-01 0.117E-05 -.297E-07 -.640E-06  
-.176E+00 0.462E+03 -.195E+03 0.182E+00 -.463E+03 0.195E+03 -.663E-02 0.105E+01  
0.233E+00 -.765E-06 0.617E-06 -.274E-05  
-.657E-01 0.210E+03 -.272E+03 0.698E-01 -.210E+03 0.272E+03 -.446E-02 0.937E-01  
0.560E-01 0.115E-06 0.937E-06 -.216E-05  
0.560E+00 0.461E+03 0.202E+03 -.563E+00 -.462E+03 -.201E+03 0.202E-02 0.102E+01 -  
.214E+00 -.659E-06 0.836E-06 -.878E-06  
0.105E+01 0.352E+03 -.234E+03 -.107E+01 -.353E+03 0.234E+03 0.160E-01 0.448E+00 -  
.425E-01 0.114E-05 -.976E-06 -.163E-05  
0.411E+00 0.351E+03 0.240E+03 -.413E+00 -.351E+03 -.240E+03 0.304E-02 0.408E+00  
0.491E-01 -.280E-07 -.616E-07 -.143E-05  
0.576E+00 0.462E+03 -.195E+03 -.581E+00 -.463E+03 0.195E+03 0.480E-02 0.105E+01  
0.235E+00 0.122E-05 0.311E-06 -.262E-05  
0.687E+00 0.210E+03 -.272E+03 -.693E+00 -.210E+03 0.272E+03 0.599E-02 0.913E-01  
0.616E-01 0.232E-06 0.159E-06 -.121E-05  
0.426E+00 0.461E+03 0.202E+03 -.428E+00 -.462E+03 -.202E+03 0.385E-02 0.102E+01 -  
.214E+00 -.130E-05 0.411E-06 0.139E-05  
0.940E+00 0.352E+03 -.233E+03 -.956E+00 -.352E+03 0.233E+03 0.151E-01 0.441E+00 -  
.377E-01 0.743E-06 -.287E-05 0.754E-06  
0.477E+00 0.351E+03 0.241E+03 -.479E+00 -.351E+03 -.241E+03 0.250E-02 0.406E+00

0.512E-01    -.120E-05 -.157E-06 -.172E-06  
0.704E+00 0.462E+03 -.194E+03    -.715E+00 -.463E+03 0.194E+03    0.786E-02 0.106E+01  
0.242E+00    0.163E-05 -.218E-05 0.640E-07  
0.726E+00 0.210E+03 -.271E+03    -.735E+00 -.210E+03 0.271E+03    0.652E-02 0.911E-01  
0.592E-01    0.478E-07 -.108E-05 0.227E-06  
-.180E+00 0.461E+03 0.202E+03    0.176E+00 -.462E+03 -.202E+03    0.448E-02 0.102E+01 -  
.218E+00    -.695E-06 0.399E-06 0.339E-05  
-.291E+00 0.352E+03 -.233E+03    0.295E+00 -.352E+03 0.233E+03    -.216E-02 0.440E+00 -  
.299E-01    -.109E-06 -.400E-05 0.180E-05  
0.412E-01 0.351E+03 0.241E+03    -.402E-01 -.351E+03 -.241E+03    0.223E-02 0.409E+00  
0.558E-01    -.125E-05 -.113E-06 0.197E-05  
0.528E-01 0.462E+03 -.194E+03    -.589E-01 -.463E+03 0.194E+03    0.393E-02 0.106E+01  
0.232E+00    0.627E-06 -.441E-05 0.231E-05  
-.438E-01 0.210E+03 -.271E+03    0.420E-01 -.210E+03 0.271E+03    -.258E-03 0.933E-01  
0.324E-01    -.129E-06 -.187E-05 0.904E-06  
-.550E+00 0.461E+03 0.202E+03    0.548E+00 -.462E+03 -.202E+03    0.759E-03 0.102E+01 -  
.220E+00    0.734E-06 0.495E-06 0.316E-05  
-.119E+01 0.352E+03 -.233E+03    0.120E+01 -.353E+03 0.233E+03    -.162E-01 0.447E+00 -  
.330E-01    -.107E-05 -.275E-05 0.548E-06  
-.351E+00 0.351E+03 0.241E+03    0.347E+00 -.351E+03 -.241E+03    0.206E-02 0.413E+00  
0.624E-01    0.134E-06 -.971E-08 0.272E-05  
-.409E+00 0.462E+03 -.194E+03    0.423E+00 -.463E+03 0.194E+03    -.115E-01 0.106E+01

0.230E+00 - .963E-06 -.420E-05 0.215E-05  
-.559E+00 0.210E+03 -.271E+03 0.563E+00 -.210E+03 0.271E+03 -.937E-02 0.915E-01

0.525E-01 -.313E-06 -.119E-05 0.101E-06  
-.475E+00 0.461E+03 0.202E+03 0.474E+00 -.462E+03 -.202E+03 0.307E-02 0.102E+01 -  
.220E+00 0.131E-05 0.707E-06 0.929E-06  
-.807E+00 0.353E+03 -.234E+03 0.821E+00 -.353E+03 0.234E+03 -.149E-01 0.447E+00 -  
.393E-01 -.823E-06 -.714E-06 -.193E-05  
-.373E+00 0.351E+03 0.241E+03 0.367E+00 -.351E+03 -.241E+03 0.959E-03 0.411E+00

0.626E-01 0.117E-05 -.509E-07 0.152E-05  
-.594E+00 0.462E+03 -.194E+03 0.607E+00 -.463E+03 0.194E+03 -.170E-01 0.105E+01

0.234E+00 -.178E-05 -.191E-05 -.285E-06  
-.589E+00 0.210E+03 -.272E+03 0.600E+00 -.210E+03 0.272E+03 -.102E-01 0.993E-01

0.567E-01 0.264E-07 0.196E-06 -.150E-05  
-.980E-02 0.206E+03 0.279E+03 0.131E-01 -.206E+03 -.279E+03 -.360E-02 0.687E-01 -  
.412E-01 0.111E-05 -.146E-05 -.710E-06  
0.665E+00 0.303E+02 0.296E+03 -.660E+00 -.302E+02 -.296E+03 -.467E-02 -.409E-01

0.754E-02 0.294E-06 -.122E-05 0.253E-06  
-.850E+00 0.144E+03 -.282E+03 0.851E+00 -.144E+03 0.282E+03 -.314E-02 0.137E+00

0.286E-01 0.794E-07 0.668E-06 -.149E-05  
0.524E+00 -.215E+02 -.285E+03 -.525E+00 0.214E+02 0.285E+03 -.791E-03 0.388E-01

0.186E-01 0.211E-06 0.147E-05 0.802E-07  
0.497E+00 -.294E+02 0.293E+03 -.494E+00 0.294E+02 -.293E+03 -.552E-02 0.255E-01 -

.303E-01 0.422E-06 -.549E-06 0.381E-06  
0.522E+00 0.139E+03 0.289E+03 -.522E+00 -.139E+03 -.289E+03 0.179E-02 0.104E+00 -  
.248E-01 0.516E-06 -.156E-05 -.733E-06  
-.127E+01 0.364E+02 -.287E+03 0.127E+01 -.364E+02 0.287E+03 -.234E-04 -.746E-02  
0.137E-01 0.379E-06 0.112E-05 -.402E-06  
0.165E+01 -.130E+03 -.271E+03 -.167E+01 0.130E+03 0.271E+03 0.107E-01 -.878E-01  
0.371E-01 0.337E-06 0.168E-05 0.677E-06  
0.395E+00 0.207E+03 0.280E+03 -.393E+00 -.207E+03 -.280E+03 0.714E-03 0.696E-01 -  
.370E-01 -.646E-07 -.169E-05 -.110E-05  
0.916E+00 0.312E+02 0.296E+03 -.920E+00 -.311E+02 -.296E+03 0.226E-02 -.409E-01  
0.122E-01 -.363E-06 -.110E-05 0.292E-06  
0.132E+01 0.144E+03 -.282E+03 -.133E+01 -.144E+03 0.282E+03 0.501E-02 0.126E+00  
0.279E-01 0.172E-06 0.801E-06 -.133E-05  
0.341E+01 -.199E+02 -.285E+03 -.342E+01 0.199E+02 0.285E+03 0.134E-01 0.415E-01  
0.136E-01 -.783E-06 0.103E-05 0.194E-06  
0.139E+01 -.287E+02 0.294E+03 -.138E+01 0.287E+02 -.294E+03 -.347E-02 0.253E-01 -  
.307E-01 0.897E-08 -.671E-06 0.832E-06  
0.676E+00 0.139E+03 0.290E+03 -.676E+00 -.139E+03 -.290E+03 0.623E-03 0.103E+00 -  
.295E-01 -.650E-06 -.155E-05 -.548E-06  
0.159E+01 0.367E+02 -.287E+03 -.158E+01 -.366E+02 0.287E+03 -.128E-01 -.204E-01  
0.128E-01 -.415E-07 0.110E-05 -.224E-06  
0.610E+01 -.125E+03 -.271E+03 -.612E+01 0.125E+03 0.271E+03 0.218E-01 -.893E-01

0.146E-01    -.750E-06 0.175E-05 -.174E-07  
0.366E+00 0.207E+03 0.280E+03    -.371E+00 -.207E+03 -.280E+03    0.110E-03 0.685E-01 -  
.365E-01    -.118E-05 -.144E-05 -.294E-06  
-.384E-01 0.319E+02 0.296E+03    0.298E-01 -.318E+02 -.296E+03    0.106E-01 -.361E-01  
0.139E-01    -.542E-06 -.201E-06 0.533E-07  
0.210E+01 0.144E+03 -.281E+03    -.211E+01 -.144E+03 0.281E+03    0.120E-01 0.120E+00  
0.240E-01    0.404E-07 -.275E-06 -.225E-06  
0.303E+01 -.172E+02 -.283E+03    -.306E+01 0.171E+02 0.283E+03    0.242E-01 0.865E-01  
0.609E-01    -.775E-06 0.485E-06 0.624E-07  
0.105E+01 -.272E+02 0.294E+03    -.105E+01 0.272E+02 -.294E+03    0.289E-02 0.244E-01 -  
.376E-01    -.223E-06 -.552E-07 0.384E-06  
0.961E-01 0.140E+03 0.290E+03    -.977E-01 -.140E+03 -.290E+03    0.131E-02 0.107E+00 -  
.232E-01    -.110E-05 -.840E-06 0.167E-06  
0.277E+01 0.387E+02 -.286E+03    -.277E+01 -.387E+02 0.286E+03    0.936E-03 -.110E-01  
0.291E-01    -.759E-06 0.323E-06 0.253E-06  
0.596E+01 -.115E+03 -.267E+03    -.611E+01 0.115E+03 0.267E+03    0.152E+00 0.211E-03  
0.131E+00    -.923E-06 0.428E-05 -.890E-06  
-.241E+00 0.207E+03 0.280E+03    0.239E+00 -.207E+03 -.280E+03    0.438E-02 0.717E-01 -  
.387E-01    -.108E-05 -.891E-06 0.954E-06  
-.114E+01 0.314E+02 0.294E+03    0.113E+01 -.314E+02 -.294E+03    0.917E-02 -.311E-01  
0.546E-02    -.603E-06 0.470E-06 -.289E-06  
0.598E+00 0.144E+03 -.281E+03    -.616E+00 -.144E+03 0.281E+03    0.178E-01 0.126E+00

0.437E-01 - .538E-06 -.916E-06 0.653E-06  
-.926E+00 -.159E+02 -.286E+03 0.918E+00 0.158E+02 0.285E+03 0.595E-02 0.909E-01

0.802E-01 -.370E-06 -.148E-05 0.701E-07  
-.642E+00 -.265E+02 0.293E+03 0.638E+00 0.265E+02 -.293E+03 0.490E-02 0.235E-01 -

.270E-01 -.382E-06 0.847E-06 -.451E-06  
-.532E+00 0.139E+03 0.289E+03 0.528E+00 -.139E+03 -.289E+03 0.654E-02 0.114E+00 -

.213E-01 -.608E-06 -.377E-06 0.729E-06  
0.785E+00 0.408E+02 -.287E+03 -.797E+00 -.408E+02 0.287E+03 0.523E-02 0.206E-02 -

.191E-01 -.773E-06 -.732E-06 0.410E-06  
-.429E+00 -.113E+03 -.276E+03 0.394E+00 0.113E+03 0.276E+03 0.362E-01 0.603E-01 -

.268E+00 -.427E-06 0.141E-05 -.105E-05  
-.569E+00 0.206E+03 0.279E+03 0.568E+00 -.206E+03 -.279E+03 0.114E-02 0.721E-01 -

.455E-01 0.170E-07 -.782E-06 0.128E-05  
-.780E+00 0.304E+02 0.294E+03 0.783E+00 -.304E+02 -.294E+03 -.756E-02 -.308E-01 -

.136E-02 0.401E-06 0.158E-06 -.436E-06  
-.123E+01 0.144E+03 -.281E+03 0.124E+01 -.145E+03 0.281E+03 -.158E-01 0.122E+00

0.504E-01 0.193E-06 -.107E-05 0.637E-06  
-.365E+01 -.174E+02 -.283E+03 0.368E+01 0.173E+02 0.283E+03 -.310E-01 0.117E+00

0.585E-01 0.597E-06 0.445E-06 0.153E-06  
-.129E+01 -.277E+02 0.291E+03 0.129E+01 0.277E+02 -.291E+03 -.133E-02 0.341E-01 -

.219E-01 -.300E-06 0.929E-06 -.104E-05  
-.345E+00 0.139E+03 0.289E+03 0.344E+00 -.139E+03 -.289E+03 0.814E-05 0.112E+00 -

.146E-01 0.583E-06 -.545E-06 0.493E-06  
-.821E+00 0.400E+02 -.287E+03 0.813E+00 -.400E+02 0.287E+03 0.127E-01 -.738E-02 -  
.183E-01 0.301E-06 -.908E-06 0.466E-06  
-.785E+01 -.119E+03 -.267E+03 0.804E+01 0.119E+03 0.267E+03 -.191E+00 0.501E-02  
0.342E-01 0.582E-06 0.439E-05 -.411E-06  
-.408E+00 0.206E+03 0.279E+03 0.409E+00 -.206E+03 -.279E+03 -.280E-02 0.716E-01 -  
.464E-01 0.119E-05 -.112E-05 0.540E-06  
-.630E-01 0.300E+02 0.294E+03 0.728E-01 -.299E+02 -.294E+03 -.948E-02 -.347E-01  
0.124E-02 0.804E-06 -.513E-06 -.107E-06  
-.206E+01 0.145E+03 -.282E+03 0.208E+01 -.145E+03 0.282E+03 -.190E-01 0.132E+00  
0.257E-01 0.547E-07 -.409E-06 -.491E-06  
-.257E+01 -.208E+02 -.285E+03 0.260E+01 0.208E+02 0.285E+03 -.291E-01 0.409E-01  
0.317E-01 0.105E-05 0.102E-05 0.398E-07  
-.549E+00 -.290E+02 0.291E+03 0.554E+00 0.290E+02 -.291E+03 -.286E-02 0.293E-01 -  
.250E-01 0.487E-06 0.373E-06 -.509E-06  
0.591E-01 0.139E+03 0.289E+03 -.593E-01 -.139E+03 -.289E+03 -.335E-03 0.109E+00 -  
.208E-01 0.126E-05 -.107E-05 -.216E-06  
-.290E+01 0.378E+02 -.286E+03 0.291E+01 -.378E+02 0.286E+03 -.149E-01 -.338E-02  
0.210E-01 0.950E-06 0.244E-06 0.282E-07  
-.515E+01 -.128E+03 -.271E+03 0.519E+01 0.128E+03 0.271E+03 -.463E-01 -.862E-01  
0.379E-01 0.114E-05 0.112E-05 0.161E-06  
0.396E+00 -.137E+03 0.280E+03 -.388E+00 0.137E+03 -.280E+03 -.968E-02 -.127E+00 -

.156E-01 0.109E-06 0.336E-06 0.786E-06  
0.192E+01 -.343E+03 0.233E+03 -.193E+01 0.344E+03 -.233E+03 0.916E-02 -.460E+00 -  
.546E-01 0.263E-06 0.635E-06 0.201E-05  
-.255E+01 -.197E+03 -.259E+03 0.256E+01 0.197E+03 0.259E+03 -.944E-02 -.197E+00  
0.369E-01 0.120E-05 0.153E-05 0.553E-06  
0.688E+01 -.447E+03 -.198E+03 -.689E+01 0.448E+03 0.198E+03 0.984E-02 -.112E+01  
0.880E-01 0.660E-06 -.158E-05 -.231E-06  
-.473E+00 -.451E+03 0.204E+03 0.474E+00 0.452E+03 -.204E+03 -.202E-02 -.108E+01 -  
.112E+00 0.216E-06 0.141E-06 0.723E-06  
0.170E+01 -.203E+03 0.269E+03 -.170E+01 0.203E+03 -.269E+03 -.479E-02 -.926E-01 -  
.319E-01 0.251E-06 0.740E-06 0.168E-05  
-.214E+01 -.338E+03 -.222E+03 0.219E+01 0.338E+03 0.222E+03 -.441E-01 -.604E+00  
0.537E-01 0.168E-05 -.156E-06 0.882E-07  
0.218E+01 -.136E+03 0.282E+03 -.217E+01 0.136E+03 -.282E+03 -.634E-02 -.126E+00 -  
.938E-02 0.278E-06 0.343E-06 0.166E-05  
0.671E+01 -.339E+03 0.238E+03 -.669E+01 0.340E+03 -.238E+03 -.127E-01 -.461E+00 -  
.459E-01 0.875E-06 0.857E-06 0.203E-05  
0.676E+01 -.193E+03 -.259E+03 -.678E+01 0.193E+03 0.258E+03 0.111E-01 -.145E+00  
0.633E-01 -.509E-06 0.204E-05 0.371E-06  
0.312E+02 -.427E+03 -.198E+03 -.313E+02 0.428E+03 0.197E+03 0.726E-01 -.969E+00  
0.135E+00 0.652E-06 -.164E-05 -.174E-05  
0.543E+01 -.449E+03 0.209E+03 -.543E+01 0.450E+03 -.209E+03 0.673E-03 -.108E+01 -

.797E-01 0.558E-06 0.311E-06 0.263E-05  
0.368E+01 -.201E+03 0.272E+03 -.367E+01 0.201E+03 -.272E+03 -.710E-03 -.975E-01 -  
.305E-01 0.402E-06 0.113E-05 0.166E-05  
0.124E+02 -.332E+03 -.223E+03 -.125E+02 0.332E+03 0.223E+03 0.121E+00 -.534E+00  
0.314E-01 -.115E-06 0.199E-06 -.362E-06  
0.219E+01 -.133E+03 0.283E+03 -.219E+01 0.133E+03 -.283E+03 0.560E-03 -.128E+00 -  
.440E-02 0.248E-06 0.104E-05 0.734E-06  
0.492E+01 -.332E+03 0.245E+03 -.489E+01 0.332E+03 -.245E+03 -.319E-01 -.476E+00 -  
.374E-01 0.101E-05 0.160E-05 -.206E-06  
0.112E+02 -.182E+03 -.258E+03 -.113E+02 0.183E+03 0.258E+03 0.468E-01 -.985E-01 -  
.104E+00 0.804E-06 0.460E-05 -.924E-06  
0.317E+02 -.399E+03 -.175E+03 -.320E+02 0.401E+03 0.174E+03 0.295E+00 -.142E+01  
0.132E+01 0.311E-05 -.287E-05 0.174E-05  
0.929E+01 -.443E+03 0.219E+03 -.929E+01 0.444E+03 -.219E+03 -.553E-02 -.109E+01 -  
.482E-01 0.106E-05 0.529E-06 0.115E-05  
0.169E+01 -.196E+03 0.273E+03 -.169E+01 0.197E+03 -.273E+03 0.551E-02 -.108E+00 -  
.511E-01 0.499E-06 0.197E-05 -.196E-06  
0.172E+02 -.310E+03 -.216E+03 -.175E+02 0.310E+03 0.216E+03 0.325E+00 -.219E+00  
0.123E+00 0.211E-05 -.191E-06 -.109E-05  
-.103E+01 -.132E+03 0.281E+03 0.102E+01 0.132E+03 -.281E+03 0.103E-01 -.127E+00  
0.160E-03 -.166E-06 0.173E-05 -.108E-05  
-.511E+01 -.332E+03 0.239E+03 0.510E+01 0.332E+03 -.239E+03 0.874E-02 -.494E+00 -

.418E-01    -.153E-05 0.100E-05 -.322E-05  
0.160E+01 -.170E+03 -.261E+03    -.173E+01 0.169E+03 0.261E+03    0.116E+00 0.369E+00 -  
.938E-01    -.549E-05 0.755E-05 -.119E-05  
-.623E+01 -.301E+03 -.189E+03    0.575E+01 0.296E+03 0.185E+03    0.441E+00 0.503E+01  
0.404E+01    -.553E-05 -.267E-05 0.133E-05  
-.619E+00 -.436E+03 0.227E+03    0.616E+00 0.437E+03 -.227E+03    0.155E-02 -.120E+01 -  
.477E-01    -.579E-06 0.276E-06 -.159E-05  
-.302E+01 -.197E+03 0.268E+03    0.300E+01 0.197E+03 -.268E+03    0.146E-01 -.111E+00 -  
.428E-01    -.676E-06 0.201E-05 -.249E-05  
0.339E+01 -.281E+03 -.215E+03    -.530E+01 0.280E+03 0.214E+03    0.191E+01 0.635E+00  
0.816E+00    -.160E-04 -.381E-05 -.139E-05  
-.273E+01 -.134E+03 0.277E+03    0.273E+01 0.134E+03 -.277E+03    0.244E-02 -.123E+00 -  
.185E-01    -.492E-06 0.162E-05 -.233E-05  
-.599E+01 -.338E+03 0.230E+03    0.599E+01 0.339E+03 -.230E+03    0.112E-01 -.494E+00 -  
.459E-01    -.355E-06 -.667E-07 -.351E-05  
-.646E+01 -.171E+03 -.257E+03    0.654E+01 0.170E+03 0.257E+03    -.794E-01 0.490E+00  
0.185E-01    0.532E-05 0.878E-05 -.924E-06  
-.442E+02 -.422E+03 -.184E+03    0.448E+02 0.423E+03 0.183E+03    -.564E+00 -.110E+01  
0.620E+00    -.302E-05 -.836E-05 0.624E-06  
-.865E+01 -.441E+03 0.211E+03    0.864E+01 0.443E+03 -.211E+03    0.143E-01 -.111E+01 -  
.751E-01    -.132E-05 -.988E-06 -.422E-05  
-.292E+01 -.201E+03 0.265E+03    0.293E+01 0.201E+03 -.265E+03    -.919E-02 -.110E+00 -

.203E-01    -.212E-06 0.153E-05 -.242E-05  
          -.144E+02 -.290E+03 -.209E+03    0.164E+02 0.289E+03 0.208E+03    -.198E+01 0.614E+00  
0.784E+00    0.162E-04 -.100E-04 -.275E-05  
          -.138E+01 -.136E+03 0.277E+03    0.139E+01 0.136E+03 -.277E+03    -.102E-01 -.125E+00 -  
.239E-01    0.497E-07 0.105E-05 -.103E-05  
          -.279E+01 -.343E+03 0.230E+03    0.277E+01 0.343E+03 -.230E+03    0.235E-01 -.473E+00 -  
.592E-01    -.114E-06 0.378E-06 -.725E-06  
          -.104E+02 -.189E+03 -.258E+03    0.105E+02 0.189E+03 0.258E+03    -.772E-01 -.140E+00 -  
.523E-01    -.109E-05 0.328E-05 -.387E-06  
          -.150E+02 -.446E+03 -.196E+03    0.151E+02 0.447E+03 0.196E+03    -.688E-01 -.113E+01  
0.991E-01    0.139E-05 -.261E-05 -.788E-06  
          -.548E+01 -.448E+03 0.204E+03    0.549E+01 0.449E+03 -.204E+03    -.487E-02 -.109E+01 -  
.125E+00    0.181E-06 -.108E-05 -.273E-05  
          -.913E+00 -.203E+03 0.267E+03    0.921E+00 0.203E+03 -.267E+03    -.910E-02 -.102E+00 -  
.316E-01    -.192E-06 0.995E-06 -.252E-06  
          -.163E+02 -.329E+03 -.218E+03    0.167E+02 0.329E+03 0.218E+03    -.360E+00 -.481E+00  
0.423E-01    -.221E-05 -.217E-05 -.676E-06  
          -.291E+00 -.257E+03 -.194E+03    -.719E+00 0.249E+03 0.190E+03    0.109E+01 0.779E+01  
0.488E+01    -.703E-05 0.238E-04 0.199E-04  
          0.529E+02 -.518E+03 -.137E+03    -.540E+02 0.522E+03 0.141E+03    0.106E+01 -.396E+01 -  
.382E+01    0.358E-05 -.462E-05 0.286E-05  
          -.487E+02 -.585E+03 -.446E+03    0.554E+02 0.636E+03 0.480E+03    -.669E+01 -.508E+02 -

.342E+02    -.110E-04 -.215E-04 -.627E-05

-----

0.513E+01 0.276E+02 0.223E+02    -.298E-12 0.114E-12 0.307E-11    -.517E+01 -.276E+02 -

.223E+02    -.152E-04 -.191E-04 0.249E-05

POSITION

TOTAL-FORCE (eV/Angst)

-----

|          |          |         |           |           |           |
|----------|----------|---------|-----------|-----------|-----------|
| 1.24575  | 4.02870  | 5.43979 | 0.000053  | 0.001036  | -0.000413 |
| 1.21024  | 4.07581  | 8.43726 | -0.000974 | 0.002627  | -0.001136 |
| 3.70862  | 4.02890  | 5.43965 | 0.000320  | 0.001907  | -0.001098 |
| 3.67998  | 4.07733  | 8.43690 | -0.004024 | -0.000405 | -0.002889 |
| 6.17157  | 4.02854  | 5.43942 | 0.000007  | -0.000122 | -0.001757 |
| 6.14482  | 4.08292  | 8.43295 | -0.002821 | -0.003288 | -0.003184 |
| 8.63513  | 4.02801  | 5.43869 | 0.000793  | -0.000426 | -0.002008 |
| 8.60339  | 4.08732  | 8.43089 | -0.000118 | -0.001161 | -0.002205 |
| 11.09928 | 4.02784  | 5.43885 | 0.000888  | 0.001990  | -0.002715 |
| 11.06021 | 4.08619  | 8.43099 | -0.001730 | 0.000723  | -0.000630 |
| 13.56311 | 4.02807  | 5.43972 | 0.000345  | 0.001639  | -0.001623 |
| 13.52141 | 4.08047  | 8.43349 | 0.000415  | -0.002239 | 0.000308  |
| 2.44241  | 15.48073 | 8.85224 | -0.000634 | -0.005296 | 0.002334  |
| 0.01714  | 15.44624 | 5.32469 | 0.000352  | 0.001538  | -0.001197 |

|          |          |         |           |           |           |
|----------|----------|---------|-----------|-----------|-----------|
| 4.86040  | 15.47728 | 8.86623 | 0.001051  | 0.000257  | -0.000307 |
| 2.48016  | 15.44854 | 5.27562 | 0.000368  | -0.001193 | -0.000518 |
| 4.94382  | 15.44925 | 5.24869 | 0.001772  | -0.002965 | 0.000273  |
| 12.31531 | 15.48242 | 9.00211 | -0.003760 | 0.000025  | 0.005725  |
| 9.86772  | 15.44556 | 5.34176 | 0.000461  | -0.001090 | 0.000891  |
| 14.76279 | 15.48245 | 8.89951 | -0.006208 | -0.000554 | 0.005512  |
| 12.33384 | 15.44510 | 5.36128 | 0.001374  | -0.003217 | -0.001270 |
| 7.40743  | 15.44616 | 5.26463 | 0.002398  | 0.001618  | 0.001310  |
| 6.44846  | 16.34427 | 7.40648 | -0.003117 | -0.000537 | 0.001993  |
| 8.60064  | 16.47644 | 7.89249 | 0.005002  | 0.002163  | 0.004785  |
| 1.24544  | 5.11881  | 5.35500 | 0.000952  | 0.000161  | -0.002448 |
| 2.44348  | 5.83889  | 8.62292 | 0.002451  | -0.004416 | 0.001221  |
| 0.01380  | 5.79530  | 5.28573 | 0.002092  | -0.002445 | 0.000470  |
| 1.21063  | 5.16420  | 8.54151 | 0.000264  | -0.000515 | -0.001905 |
| 2.44351  | 7.27931  | 8.74832 | -0.000060 | -0.001249 | -0.000128 |
| 3.70866  | 5.11896  | 5.35390 | -0.000417 | -0.001621 | 0.000338  |
| 4.90800  | 5.84315  | 8.62123 | -0.001087 | 0.003836  | -0.000761 |
| 2.47701  | 5.79561  | 5.28397 | 0.001467  | -0.000590 | -0.002608 |
| 3.67679  | 5.16572  | 8.54000 | -0.000117 | 0.001644  | -0.000046 |
| 4.90764  | 7.28398  | 8.74777 | 0.000716  | -0.000631 | 0.001023  |
| 6.17184  | 5.11860  | 5.35433 | 0.001490  | 0.000401  | 0.000897  |
| 7.37096  | 5.84929  | 8.62094 | -0.000637 | 0.007120  | -0.002441 |

|          |          |         |           |           |           |
|----------|----------|---------|-----------|-----------|-----------|
| 4.94029  | 5.79548  | 5.28340 | 0.000620  | -0.002681 | -0.001175 |
| 6.14080  | 5.17108  | 8.53715 | -0.002476 | 0.002541  | 0.002460  |
| 7.37071  | 7.28983  | 8.75132 | -0.002016 | 0.001619  | 0.000141  |
| 8.63543  | 5.11820  | 5.35521 | 0.001253  | 0.001351  | -0.001061 |
| 9.83233  | 5.85166  | 8.62337 | 0.002859  | 0.000699  | -0.001090 |
| 7.40374  | 5.79498  | 5.28512 | 0.003471  | -0.002684 | -0.001340 |
| 8.60194  | 5.17528  | 8.53759 | -0.001889 | -0.000421 | -0.000228 |
| 9.83204  | 7.29110  | 8.75719 | -0.001714 | -0.002632 | -0.002437 |
| 11.09930 | 5.11814  | 5.35578 | -0.000858 | -0.003348 | -0.001362 |
| 12.29449 | 5.84673  | 8.62385 | 0.000008  | 0.005782  | -0.002205 |
| 9.86750  | 5.79468  | 5.28678 | -0.000730 | -0.000706 | 0.001548  |
| 11.06261 | 5.17409  | 8.53894 | 0.002672  | 0.002639  | -0.000406 |
| 12.29428 | 7.28729  | 8.75533 | -0.004551 | 0.001154  | -0.001526 |
| 13.56278 | 5.11829  | 5.35605 | 0.002668  | 0.000529  | -0.001976 |
| 14.75895 | 5.83988  | 8.62434 | -0.000239 | -0.002625 | -0.002183 |
| 12.33118 | 5.79480  | 5.28692 | -0.004491 | -0.001450 | 0.002591  |
| 13.52535 | 5.16844  | 8.54022 | -0.003476 | 0.003779  | -0.001443 |
| 14.75917 | 7.28012  | 8.75179 | 0.000963  | 0.002577  | -0.000694 |
| 0.01434  | 7.23830  | 5.19017 | 0.000093  | -0.000201 | 0.000078  |
| 1.24689  | 9.38061  | 5.13160 | 0.000553  | -0.001854 | 0.000001  |
| 1.21085  | 7.98059  | 8.79588 | -0.000933 | -0.000467 | 0.001528  |
| 2.44214  | 10.12243 | 8.87141 | -0.000852 | 0.003334  | -0.005003 |

|         |          |         |           |           |           |
|---------|----------|---------|-----------|-----------|-----------|
| 0.01532 | 10.08686 | 5.14049 | -0.002027 | -0.000129 | -0.002399 |
| 1.24606 | 7.94244  | 5.15775 | 0.002025  | -0.002590 | 0.000829  |
| 1.21082 | 9.41592  | 8.85782 | -0.000783 | 0.004347  | 0.000183  |
| 2.44072 | 11.55513 | 8.88414 | -0.006026 | -0.002822 | 0.001620  |
| 2.47747 | 7.23842  | 5.18585 | 0.002809  | 0.002883  | 0.001313  |
| 3.70997 | 9.38055  | 5.12566 | -0.001077 | -0.003001 | 0.000045  |
| 3.67534 | 7.98360  | 8.79349 | -0.000577 | 0.001078  | 0.000960  |
| 4.90487 | 10.12925 | 8.87518 | 0.000276  | -0.000198 | 0.000009  |
| 2.47867 | 10.08713 | 5.12695 | -0.002250 | 0.001507  | 0.000764  |
| 3.70939 | 7.94242  | 5.15441 | 0.000838  | -0.004007 | -0.001699 |
| 3.67589 | 9.41970  | 8.85445 | -0.001486 | 0.001935  | -0.000154 |
| 4.90263 | 11.56506 | 8.89086 | -0.000226 | 0.001429  | 0.000926  |
| 4.94085 | 7.23830  | 5.18552 | -0.004699 | 0.002257  | 0.000832  |
| 6.17318 | 9.38002  | 5.13173 | 0.002028  | 0.002105  | 0.001832  |
| 6.13864 | 7.99044  | 8.79647 | 0.002477  | -0.000285 | -0.001685 |
| 7.36780 | 10.13760 | 8.89473 | -0.001106 | 0.003365  | 0.000774  |
| 4.94196 | 10.08682 | 5.12700 | 0.004158  | 0.001480  | -0.001154 |
| 6.17284 | 7.94199  | 5.15766 | -0.000035 | 0.000562  | 0.003030  |
| 6.13939 | 9.42660  | 8.86164 | 0.000875  | -0.000523 | -0.002160 |
| 7.36410 | 11.57721 | 8.92935 | -0.000475 | -0.002956 | 0.003519  |
| 7.40426 | 7.23794  | 5.19012 | 0.002148  | 0.001772  | 0.001076  |
| 8.63700 | 9.37970  | 5.14543 | -0.000537 | 0.002949  | 0.000955  |

|          |          |         |           |           |           |
|----------|----------|---------|-----------|-----------|-----------|
| 8.60086  | 7.99568  | 8.80617 | 0.001079  | -0.000420 | -0.001086 |
| 9.83068  | 10.14286 | 8.92842 | -0.002009 | 0.002627  | -0.000681 |
| 7.40553  | 10.08627 | 5.14064 | 0.001228  | -0.003558 | 0.003147  |
| 8.63637  | 7.94166  | 5.16555 | 0.002633  | 0.001801  | -0.001409 |
| 8.60077  | 9.43254  | 8.88532 | -0.006017 | 0.002272  | -0.001292 |
| 9.82927  | 11.58244 | 9.00096 | 0.001429  | 0.003031  | 0.000981  |
| 9.86805  | 7.23787  | 5.19489 | -0.000352 | 0.000107  | -0.000213 |
| 11.10106 | 9.37979  | 5.15156 | -0.003824 | -0.001024 | 0.000658  |
| 11.06331 | 7.99411  | 8.80818 | -0.000262 | -0.001628 | 0.000133  |
| 12.29815 | 10.12943 | 8.90340 | -0.001435 | -0.001186 | 0.001216  |
| 9.86930  | 10.08593 | 5.15631 | -0.005430 | -0.001443 | 0.001407  |
| 11.10021 | 7.94175  | 5.16862 | -0.000585 | -0.003070 | 0.001389  |
| 11.06206 | 9.43062  | 8.88839 | 0.004678  | 0.001810  | 0.002095  |
| 12.30255 | 11.56557 | 8.94694 | 0.004129  | 0.000128  | -0.000783 |
| 12.33169 | 7.23799  | 5.19447 | -0.001026 | 0.000249  | -0.001751 |
| 13.56437 | 9.38021  | 5.14435 | 0.000744  | 0.001650  | -0.000575 |
| 13.52754 | 7.98555  | 8.80171 | -0.000786 | -0.002555 | -0.003097 |
| 14.76233 | 10.12320 | 8.88285 | -0.005178 | 0.000929  | -0.001574 |
| 12.33257 | 10.08637 | 5.15511 | 0.002653  | 0.000554  | -0.001541 |
| 13.56350 | 7.94214  | 5.16485 | -0.000069 | -0.000882 | -0.000372 |
| 13.52731 | 9.42040  | 8.86925 | -0.000050 | 0.003282  | -0.000579 |
| 14.76430 | 11.55727 | 8.90646 | -0.002223 | -0.000842 | 0.001886  |

|         |          |         |           |           |           |
|---------|----------|---------|-----------|-----------|-----------|
| 0.01611 | 11.52516 | 5.16621 | -0.001070 | -0.002567 | 0.000390  |
| 1.24770 | 13.67535 | 5.22209 | 0.001817  | -0.002373 | -0.002486 |
| 1.21217 | 12.26335 | 8.89409 | 0.000475  | -0.000277 | 0.001167  |
| 2.43998 | 14.38728 | 8.86748 | -0.002592 | 0.001042  | 0.000803  |
| 0.01699 | 14.35408 | 5.27295 | -0.000405 | -0.000577 | -0.001961 |
| 1.24794 | 12.22963 | 5.17275 | 0.001071  | 0.000858  | -0.001363 |
| 1.21434 | 13.70818 | 8.88771 | 0.002039  | 0.002139  | 0.003812  |
| 2.47958 | 11.52580 | 5.14547 | -0.001603 | -0.000190 | -0.001479 |
| 3.71218 | 13.67636 | 5.19535 | 0.004631  | 0.000577  | 0.001061  |
| 3.66932 | 12.26248 | 8.88184 | -0.002255 | 0.000062  | -0.000592 |
| 4.89370 | 14.38589 | 8.86075 | 0.004040  | -0.001010 | -0.002745 |
| 2.48000 | 14.35596 | 5.23149 | 0.001304  | -0.001117 | 0.001694  |
| 3.71150 | 12.23022 | 5.15602 | 0.000926  | -0.004545 | 0.001006  |
| 3.66212 | 13.70366 | 8.87117 | -0.005473 | 0.004091  | -0.000619 |
| 4.94290 | 11.52542 | 5.14351 | -0.000074 | -0.001755 | -0.001602 |
| 6.17627 | 13.67505 | 5.20032 | 0.000855  | 0.000587  | 0.000065  |
| 6.13145 | 12.27911 | 8.90591 | 0.005517  | 0.006096  | 0.004660  |
| 7.36614 | 14.42967 | 8.88203 | 0.000015  | -0.002186 | 0.000454  |
| 4.94347 | 14.35627 | 5.21375 | 0.000105  | -0.001923 | 0.001079  |
| 6.17493 | 12.22917 | 5.16623 | -0.001406 | -0.001043 | 0.001534  |
| 6.11879 | 13.72336 | 8.87765 | 0.006121  | 0.001689  | 0.000029  |
| 7.40625 | 11.52413 | 5.16368 | 0.000915  | -0.003347 | 0.000351  |

|          |          |         |           |           |           |
|----------|----------|---------|-----------|-----------|-----------|
| 8.63876  | 13.67323 | 5.24377 | 0.001914  | 0.002069  | -0.001306 |
| 8.58939  | 12.29067 | 9.00208 | -0.003074 | 0.001840  | -0.001914 |
| 9.83855  | 14.39048 | 9.30305 | -0.038707 | 0.002935  | 0.005987  |
| 7.40672  | 14.35386 | 5.23530 | -0.001160 | -0.000358 | -0.000662 |
| 8.63820  | 12.22778 | 5.19800 | 0.000324  | -0.001221 | 0.001037  |
| 8.55571  | 13.73596 | 9.04598 | 0.004576  | -0.011247 | 0.001852  |
| 9.86985  | 11.52338 | 5.18893 | 0.001764  | -0.001975 | -0.000114 |
| 11.10099 | 13.67352 | 5.27669 | 0.003216  | -0.000911 | -0.001001 |
| 11.07378 | 12.27333 | 9.00891 | -0.007104 | 0.003038  | -0.001834 |
| 12.30694 | 14.38896 | 9.00333 | -0.001397 | -0.000397 | 0.000408  |
| 9.86934  | 14.35300 | 5.29564 | 0.002942  | 0.000081  | 0.000006  |
| 11.10161 | 12.22804 | 5.21650 | -0.001095 | -0.002708 | 0.001060  |
| 11.11464 | 13.70636 | 9.07877 | 0.010335  | 0.006002  | 0.001213  |
| 12.33326 | 11.52411 | 5.18815 | -0.000917 | 0.000275  | 0.000534  |
| 13.56430 | 13.67399 | 5.25995 | 0.001544  | -0.000086 | 0.000071  |
| 13.53626 | 12.26601 | 8.93587 | -0.002220 | 0.004210  | 0.002242  |
| 14.76266 | 14.38906 | 8.90426 | -0.003794 | 0.001709  | 0.003576  |
| 12.33397 | 14.35288 | 5.30710 | 0.002800  | -0.001789 | -0.001761 |
| 13.56505 | 12.22870 | 5.20105 | 0.000126  | 0.000108  | -0.001136 |
| 13.54921 | 13.70690 | 8.94399 | -0.001206 | -0.004623 | -0.000181 |
| 9.91126  | 15.53185 | 9.99472 | 0.085272  | 0.117122  | 0.079603  |
| 7.28864  | 16.40884 | 8.69813 | 0.004494  | -0.005520 | 0.000451  |

10.04026 16.50365 10.64498 -0.049510 -0.117431 -0.078773

-----

total drift: -0.046322 0.023736 -0.022868

-----

FREE ENERGIE OF THE ION-ELECTRON SYSTEM (eV)

-----

free energy TOTEN = -1209.38892592 eV

energy without entropy= -1209.38892592 energy(sigma->0) = -1209.38892592

d Force = 0.4889757E-02[ 0.451E-03, 0.933E-02] d Energy = 0.4839720E-02 0.500E-04

d Force = 0.3634532E+01[ 0.367E+01, 0.360E+01] d Ewald = 0.3634270E+01 0.262E-03

-----

POTLOK: cpu time 0.4253: real time 0.4261

---

stress matrix after NEB project (eV)

-17.75778 -0.24675 0.04210

-0.24675 -15.39663 0.38306

0.04210 0.38306 -19.10934

FORCES: max atom, RMS 0.165305 0.018401

FORCE total and by dimension 0.223097 0.117431

Stress total and by dimension 30.298197 19.109341

Finite differences progress:

Degree of freedom: 4/ 6

Displacement: 1/ 2

Total: 7/ 12

LATTYP: Found a simple orthorhombic cell.

ALAT = 14.7806000000

B/A-ratio = 1.2466138046

C/A-ratio = 1.4433717170

Lattice vectors:

$$A1 = (-14.7806000000, 0.0000000000, 0.0000000000)$$

$$A2 = (0.0000000000, 0.0000000000, -18.4257000000)$$

$$A3 = (0.0000000000, -21.3339000000, 0.0000000000)$$

Analysis of symmetry for initial positions (statically):

---

Subroutine PRICEL returns:

Original cell was already a primitive cell.

Routine SETGRP: Setting up the symmetry group for a  
simple orthorhombic supercell.

Subroutine GETGRP returns: Found 1 space group operations

(whereof 1 operations were pure point group operations)

out of a pool of 8 trial point group operations.

The static configuration has the point symmetry  $C_1$ .

Analysis of symmetry for dynamics (positions and initial velocities):

=====

Subroutine PRICEL returns:

Original cell was already a primitive cell.

Routine SETGRP: Setting up the symmetry group for a  
simple orthorhombic supercell.

Subroutine GETGRP returns: Found 1 space group operations  
(whereof 1 operations were pure point group operations)  
out of a pool of 8 trial point group operations.

The dynamic configuration has the point symmetry  $C_1$ .

Analysis of constrained symmetry for selective dynamics:

---

---

Subroutine PRICEL returns:

Original cell was already a primitive cell.

Routine SETGRP: Setting up the symmetry group for a  
simple orthorhombic supercell.

Subroutine GETGRP returns: Found 1 space group operations  
(whereof 1 operations were pure point group operations)  
out of a pool of 8 trial point group operations.

The constrained configuration has the point symmetry  $C_1$ .

Analysis of structural, dynamic, and magnetic symmetry:

---

---

Subroutine PRICEL returns:

Original cell was already a primitive cell.

Routine SETGRP: Setting up the symmetry group for a  
simple orthorhombic supercell.

Subroutine GETGRP returns: Found 1 space group operations  
(whereof 1 operations were pure point group operations)  
out of a pool of 8 trial point group operations.

The magnetic configuration has the point symmetry C<sub>1</sub> .

Subroutine INISYM returns: Found 1 space group operations  
(whereof 1 operations are pure point group operations),  
and found 1 'primitive' translations

KPOINTS: KPT-Resolved Value to Generate K-Mesh: 0

Automatic generation of k-mesh.

Space group operators:

|          |          |          |          |          |          |          |
|----------|----------|----------|----------|----------|----------|----------|
| irotn    | det(A)   | alpha    | n_x      | n_y      | n_z      | tau_x    |
| tau_y    | tau_z    |          |          |          |          |          |
| 1        | 1.000000 | 0.000000 | 1.000000 | 0.000000 | 0.000000 | 0.000000 |
| 0.000000 | 0.000000 |          |          |          |          |          |

Subroutine IBZKPT returns following result:

=====

Found 1 irreducible k-points:

Following reciprocal coordinates:

| Coordinates |          |          | Weight   |
|-------------|----------|----------|----------|
| 0.000000    | 0.000000 | 0.000000 | 1.000000 |

Following cartesian coordinates:

| Coordinates |          |          | Weight   |
|-------------|----------|----------|----------|
| 0.000000    | 0.000000 | 0.000000 | 1.000000 |

WAVPRE: cpu time 0.1187: real time 0.1400

FEWALD: cpu time 0.0025: real time 0.0025

ORTHCH: cpu time 0.9987: real time 1.0021

LOOP+: cpu time 168.1882: real time 169.1781

----- Iteration 9( 1) -----

|           |          |         |           |        |
|-----------|----------|---------|-----------|--------|
| POTLOK:   | cpu time | 0.1688: | real time | 0.1795 |
| SETDIJ:   | cpu time | 0.0101: | real time | 0.0101 |
| EDDIAG:   | cpu time | 1.9312: | real time | 1.9369 |
| RMM-DIIS: | cpu time | 7.1124: | real time | 7.1325 |
| ORTHCH:   | cpu time | 0.3527: | real time | 0.3536 |
| DOS:      | cpu time | 0.0004: | real time | 0.0004 |
| CHARGE:   | cpu time | 0.5262: | real time | 0.5277 |
| MIXING:   | cpu time | 0.0043: | real time | 0.0043 |

-----

|       |          |          |           |         |
|-------|----------|----------|-----------|---------|
| LOOP: | cpu time | 10.1060: | real time | 10.1448 |
|-------|----------|----------|-----------|---------|

eigenvalue-minimisations : 1926

total energy-change (2. order) :-0.1734973E-01 (-0.4931775E+00)

|                    |             |               |           |
|--------------------|-------------|---------------|-----------|
| number of electron | 518.9999717 | magnetization | 0.9999998 |
|--------------------|-------------|---------------|-----------|

|                   |            |               |           |
|-------------------|------------|---------------|-----------|
| augmentation part | 11.7335032 | magnetization | 0.0542805 |
|-------------------|------------|---------------|-----------|

Broyden mixing:

rms(total) = 0.37533E-01      rms(broyden)= 0.36933E-01

rms(prec ) = 0.38397E-01

weight for this iteration      100.00

Free energy of the ion-electron system (eV)

-----

alpha Z          PSCENC =          233.50077011

Ewald energy    TEWEN =          91329.99480157

-Hartree energ DENC =   -107336.25642576

-exchange       EXHF =            0.00000000

-V(xc)+E(xc)    XCENC =          1743.79702159

PAW double counting =    52174.20513944   -52237.12224524

entropy T\*S     EENTRO =         -0.00000000

eigenvalues     EBANDS =         -5815.23745418

atomic energy   EATOM =          18704.32991668

Solvation    Ediel\_sol =          0.00000000

-----

free energy     TOTEN =         -1202.78847579 eV

energy without entropy =   -1202.78847579    energy(sigma->0) =   -1202.78847579

-----

----- Iteration 9( 2) -----

|           |          |         |           |        |
|-----------|----------|---------|-----------|--------|
| POTLOK:   | cpu time | 0.1661: | real time | 0.1741 |
| SETDIJ:   | cpu time | 0.0102: | real time | 0.0102 |
| EDDIAG:   | cpu time | 1.9264: | real time | 1.9326 |
| RMM-DIIS: | cpu time | 7.2788: | real time | 7.3071 |
| ORTHCH:   | cpu time | 0.3545: | real time | 0.3553 |
| DOS:      | cpu time | 0.0004: | real time | 0.0004 |
| CHARGE:   | cpu time | 0.5272: | real time | 0.5288 |
| MIXING:   | cpu time | 0.0048: | real time | 0.0048 |

-----

|       |          |          |           |         |
|-------|----------|----------|-----------|---------|
| LOOP: | cpu time | 10.2683: | real time | 10.3133 |
|-------|----------|----------|-----------|---------|

eigenvalue-minimisations : 1940

total energy-change (2. order) : 0.1619721E-01 (-0.3190486E-02)

number of electron 518.9999717 magnetization 0.9999998

augmentation part            11.7409495 magnetization            0.0542641

Broyden mixing:

rms(total) = 0.29615E-01      rms(broyden)= 0.29553E-01

rms(prec ) = 0.31329E-01

weight for this iteration      100.00

eigenvalues of (default mixing \* dielectric matrix)

average eigenvalue GAMMA=    0.6684

0.6684

Free energy of the ion-electron system (eV)

-----

alpha Z            PSCENC =            233.50077011

Ewald energy      TEWEN    =            91329.99480157

-Hartree energ DENC    =    -107336.38119694

-exchange          EXHF      =            0.00000000

-V(xc)+E(xc)      XCENC    =            1743.78206895

PAW double counting    =    52175.80804047    -52238.71915954

entropy T\*S        EENTRO =            -0.00000000

eigenvalues        EBANDS =            -5815.08751988

atomic energy      EATOM    =            18704.32991668

Solvation Ediel\_sol = 0.00000000

-----

free energy TOTEN = -1202.77227858 eV

energy without entropy = -1202.77227858 energy(sigma->0) = -1202.77227858

-----

----- Iteration 9( 3) -----

|           |          |         |           |        |
|-----------|----------|---------|-----------|--------|
| POTLOK:   | cpu time | 0.1650: | real time | 0.1852 |
| SETDIJ:   | cpu time | 0.0101: | real time | 0.0101 |
| EDDIAG:   | cpu time | 1.9251: | real time | 1.9317 |
| RMM-DIIS: | cpu time | 7.1128: | real time | 7.1490 |
| ORTHCH:   | cpu time | 0.3525: | real time | 0.3537 |
| DOS:      | cpu time | 0.0004: | real time | 0.0004 |
| CHARGE:   | cpu time | 0.5279: | real time | 0.5295 |

MIXING: cpu time 0.0050: real time 0.0050

-----

LOOP: cpu time 10.0987: real time 10.1647

eigenvalue-minimisations : 1924

total energy-change (2. order) : 0.1335664E-02 (-0.1007045E-03)

number of electron 518.9999717 magnetization 0.9999998

augmentation part 11.7386796 magnetization 0.0542695

Broyden mixing:

rms(total) = 0.15109E-01 rms(broyden)= 0.15105E-01

rms(prec ) = 0.15740E-01

weight for this iteration 100.00

eigenvalues of (default mixing \* dielectric matrix)

average eigenvalue GAMMA= 1.3823

0.6750 2.0897

Free energy of the ion-electron system (eV)

-----

alpha Z PSCENC = 233.50077011

Ewald energy TEWEN = 91329.99480157

-Hartree energ DENC = -107336.49145479

-exchange EXHF = 0.00000000

-V(xc)+E(xc) XCENC = 1743.79858338

PAW double counting = 52176.78977678 -52239.70615217

entropy T\*S EENTRO = -0.00000000

eigenvalues EBANDS = -5814.98718448

atomic energy EATOM = 18704.32991668

Solvation Ediel\_sol = 0.00000000

-----  
free energy TOTEN = -1202.77094292 eV

energy without entropy = -1202.77094292 energy(sigma->0) = -1202.77094292

----- Iteration 9( 4) -----

|           |          |          |           |         |
|-----------|----------|----------|-----------|---------|
| POTLOK:   | cpu time | 0.1646:  | real time | 0.1826  |
| SETDIJ:   | cpu time | 0.0101:  | real time | 0.0101  |
| EDDIAG:   | cpu time | 1.9351:  | real time | 1.9416  |
| RMM-DIIS: | cpu time | 7.1426:  | real time | 7.1717  |
| ORTHCH:   | cpu time | 0.3529:  | real time | 0.3539  |
| DOS:      | cpu time | 0.0004:  | real time | 0.0004  |
| CHARGE:   | cpu time | 0.5276:  | real time | 0.5294  |
| MIXING:   | cpu time | 0.0055:  | real time | 0.0055  |
| -----     |          |          |           |         |
| LOOP:     | cpu time | 10.1388: | real time | 10.1951 |

eigenvalue-minimisations : 1926

total energy-change (2. order) :-0.3047246E-03 (-0.2111535E-03)

number of electron 518.9999717 magnetization 0.9999998

augmentation part 11.7362388 magnetization 0.0542774

Broyden mixing:

rms(total) = 0.92556E-02 rms(broyden)= 0.92409E-02

rms(prec ) = 0.99766E-02

weight for this iteration 100.00

eigenvalues of (default mixing \* dielectric matrix)

average eigenvalue GAMMA= 1.2368

2.0591 0.8256 0.8256

Free energy of the ion-electron system (eV)

-----

alpha Z PSCENC = 233.50077011

Ewald energy TEWEN = 91329.99480157

-Hartree energy DENC = -107336.68228853

-exchange EXHF = 0.00000000

-V(xc)+E(xc) XCENC = 1743.81393589

PAW double counting = 52178.93235672 -52241.85471189

entropy T\*S EENTRO = -0.00000000

eigenvalues EBANDS = -5814.80602819

atomic energy EATOM = 18704.32991668

Solvation Ediel\_sol = 0.00000000

-----

free energy TOTEN = -1202.77124764 eV

energy without entropy = -1202.77124764 energy(sigma->0) = -1202.77124764

-----

----- Iteration 9( 5) -----

|           |          |         |           |        |
|-----------|----------|---------|-----------|--------|
| POTLOK:   | cpu time | 0.1646: | real time | 0.1673 |
| SETDIJ:   | cpu time | 0.0101: | real time | 0.0101 |
| EDDIAG:   | cpu time | 1.9261: | real time | 1.9324 |
| RMM-DIIS: | cpu time | 6.9454: | real time | 6.9851 |
| ORTHCH:   | cpu time | 0.3531: | real time | 0.3541 |
| DOS:      | cpu time | 0.0004: | real time | 0.0004 |
| CHARGE:   | cpu time | 0.5276: | real time | 0.5293 |
| MIXING:   | cpu time | 0.0055: | real time | 0.0056 |
| -----     |          |         |           |        |
| LOOP:     | cpu time | 9.9326: | real time | 9.9842 |

eigenvalue-minimisations : 1904

total energy-change (2. order) : 0.1718227E-03 (-0.2217663E-04)

number of electron 518.9999717 magnetization 0.9999998

augmentation part 11.7374550 magnetization 0.0542733

Broyden mixing:

rms(total) = 0.18791E-02      rms(broyden)= 0.18717E-02

rms(prec ) = 0.19947E-02

weight for this iteration      100.00

eigenvalues of (default mixing \* dielectric matrix)

average eigenvalue GAMMA=    1.3455

2.0607   1.5529   0.8843   0.8843

Free energy of the ion-electron system (eV)

-----

alpha Z          PSCENC =          233.50077011

Ewald energy    TEWEN   =          91329.99480157

-Hartree energy DENC   =   -107336.65137255

-exchange       EXHF     =          0.00000000

-V(xc)+E(xc)    XCENC   =          1743.80667957

PAW double counting   =    52178.89831957   -52241.81846607

entropy T\*S     EENTRO =          -0.00000000

eigenvalues     EBANDS =          -5814.83172471

atomic energy   EATOM   =          18704.32991668

Solvation    Ediel\_sol   =          0.00000000

-----  
free energy    TOTEN    =    -1202.77107582 eV

energy without entropy =    -1202.77107582    energy(sigma->0) =    -1202.77107582

----- Iteration            9(    6) -----

|           |          |         |           |        |
|-----------|----------|---------|-----------|--------|
| POTLOK:   | cpu time | 0.1657: | real time | 0.1945 |
| SETDIJ:   | cpu time | 0.0102: | real time | 0.0102 |
| EDDIAG:   | cpu time | 1.9279: | real time | 1.9340 |
| RMM-DIIS: | cpu time | 6.8415: | real time | 6.8734 |
| ORTHCH:   | cpu time | 0.3521: | real time | 0.3531 |
| DOS:      | cpu time | 0.0004: | real time | 0.0004 |
| CHARGE:   | cpu time | 0.5267: | real time | 0.5284 |
| MIXING:   | cpu time | 0.0058: | real time | 0.0059 |

-----  
LOOP:  cpu time    9.8304: real time    9.9000

eigenvalue-minimisations : 1837

total energy-change (2. order) :-0.9360323E-05  (-0.2543957E-05)

number of electron    518.9999717 magnetization        0.9999998

augmentation part     11.7377575 magnetization       0.0542728

Broyden mixing:

rms(total) = 0.62766E-03    rms(broyden)= 0.62176E-03

rms(prec ) = 0.67327E-03

weight for this iteration    100.00

eigenvalues of (default mixing \* dielectric matrix)

average eigenvalue GAMMA=   1.3586

2.3728  1.7539  0.9211  0.9211  0.8240

Free energy of the ion-electron system (eV)

-----  
alpha Z           PSCENC =       233.50077011

Ewald energy    TEWEN  =       91329.99480157

-Hartree energ DENC  =   -107336.66924929

-exchange EXHF = 0.00000000  
-V(xc)+E(xc) XCENC = 1743.80544126  
PAW double counting = 52179.05129183 -52241.97127589  
entropy T\*S EENTRO = -0.00000000  
eigenvalues EBANDS = -5814.81278145  
atomic energy EATOM = 18704.32991668  
Solvation Ediel\_sol = 0.00000000

-----  
free energy TOTEN = -1202.77108518 eV

energy without entropy = -1202.77108518 energy(sigma->0) = -1202.77108518

----- Iteration 9( 7) -----

POTLOK: cpu time 0.1651: real time 0.1775

|           |          |                   |        |
|-----------|----------|-------------------|--------|
| SETDIJ:   | cpu time | 0.0101: real time | 0.0101 |
| EDDIAG:   | cpu time | 1.9271: real time | 1.9341 |
| RMM-DIIS: | cpu time | 6.1134: real time | 6.1323 |
| ORTHCH:   | cpu time | 0.3533: real time | 0.3545 |
| DOS:      | cpu time | 0.0004: real time | 0.0004 |
| CHARGE:   | cpu time | 0.5271: real time | 0.5291 |
| MIXING:   | cpu time | 0.0059: real time | 0.0059 |
| -----     |          |                   |        |
| LOOP:     | cpu time | 9.1023: real time | 9.1438 |

eigenvalue-minimisations : 1663

total energy-change (2. order) :-0.4139642E-05 (-0.1532753E-06)

number of electron      518.9999717 magnetization      0.9999998

augmentation part      11.7376924 magnetization      0.0542725

Broyden mixing:

rms(total) = 0.15188E-03      rms(broyden)= 0.15162E-03

rms(prec ) = 0.20266E-03

weight for this iteration      100.00

eigenvalues of (default mixing \* dielectric matrix)

average eigenvalue GAMMA=      1.3100

2.4904 1.6754 1.2257 0.8878 0.8878 0.6931

Free energy of the ion-electron system (eV)

-----

alpha Z        PSCENC =        233.50077011

Ewald energy    TEWEN =        91329.99480157

-Hartree energ DENC =   -107336.69077239

-exchange       EXHF =            0.00000000

-V(xc)+E(xc)    XCENC =        1743.80604697

PAW double counting =    52179.15307302   -52242.07332631

entropy T\*S     EENTRO =        -0.00000000

eigenvalues     EBANDS =       -5814.79159898

atomic energy   EATOM =        18704.32991668

Solvation    Ediel\_sol =        0.00000000

-----

free energy     TOTEN =       -1202.77108932 eV

energy without entropy =   -1202.77108932    energy(sigma->0) =   -1202.77108932

-----

----- Iteration 9( 8) -----

POTLOK: cpu time 0.1664: real time 0.1717  
SETDIJ: cpu time 0.0101: real time 0.0101  
EDDIAG: cpu time 1.9290: real time 1.9351  
RMM-DIIS: cpu time 5.2633: real time 5.2889  
ORTHCH: cpu time 0.3519: real time 0.3529  
DOS: cpu time 0.0004: real time 0.0004  
CHARGE: cpu time 0.5266: real time 0.5282  
MIXING: cpu time 0.0064: real time 0.0064

-----

LOOP: cpu time 8.2541: real time 8.2937

eigenvalue-minimisations : 1442

total energy-change (2. order) :-0.2708715E-05 (-0.1569063E-07)

number of electron 518.9999717 magnetization 0.9999998

augmentation part 11.7376818 magnetization 0.0542725

Broyden mixing:

rms(total) = 0.11809E-03      rms(broyden)= 0.11804E-03

rms(prec ) = 0.16395E-03

weight for this iteration      100.00

eigenvalues of (default mixing \* dielectric matrix)

average eigenvalue GAMMA=    1.3616

2.5497   1.8725   1.6586   0.9329   0.9329   0.9223   0.6620

Free energy of the ion-electron system (eV)

-----

alpha Z          PSCENC =          233.50077011

Ewald energy    TEWEN =          91329.99480157

-Hartree energ DENC =   -107336.70036625

-exchange       EXHF =            0.00000000

-V(xc)+E(xc)   XCENC =          1743.80614204

PAW double counting =    52179.16946208   -52242.08974770

entropy T\*S     EENTRO =          -0.00000000

eigenvalues     EBANDS =          -5814.78207056

atomic energy   EATOM =          18704.32991668

Solvation    Ediel\_sol =          0.00000000

-----

free energy TOTEN = -1202.77109203 eV

energy without entropy = -1202.77109203 energy(sigma->0) = -1202.77109203

-----

----- Iteration 9( 9) -----

|           |          |         |           |        |
|-----------|----------|---------|-----------|--------|
| POTLOK:   | cpu time | 0.1624: | real time | 0.1638 |
| SETDIJ:   | cpu time | 0.0101: | real time | 0.0101 |
| EDDIAG:   | cpu time | 1.9264: | real time | 1.9324 |
| RMM-DIIS: | cpu time | 5.3372: | real time | 5.3537 |
| ORTHCH:   | cpu time | 0.3541: | real time | 0.3551 |
| DOS:      | cpu time | 0.0007: | real time | 0.0007 |
| CHARGE:   | cpu time | 0.5270: | real time | 0.5288 |
| MIXING:   | cpu time | 0.0069: | real time | 0.0069 |

-----

LOOP:  cpu time    8.3248: real time    8.3515

eigenvalue-minimisations : 1456

total energy-change (2. order) :-0.5067712E-05  (-0.1921821E-07)

number of electron    518.9999717 magnetization        0.9999998

augmentation part     11.7377078 magnetization       0.0542725

Broyden mixing:

rms(total) = 0.82181E-04    rms(broyden)= 0.82023E-04

rms(prec ) = 0.10997E-03

weight for this iteration    100.00

eigenvalues of (default mixing \* dielectric matrix)

average eigenvalue GAMMA=   1.3779

2.7052  2.3668  1.6660  1.0773  0.9039  0.9039  0.7545  0.6454

Free energy of the ion-electron system (eV)

-----

alpha Z           PSCENC =       233.50077011

Ewald energy    TEWEN  =       91329.99480157

-Hartree energ DENC  =   -107336.71694638

-exchange       EXHF   =       0.00000000

-V(xc)+E(xc) XCENC = 1743.80608981

PAW double counting = 52179.17393062 -52242.09418614

entropy T\*S EENTRO = -0.00000000

eigenvalues EBANDS = -5814.76547337

atomic energy EATOM = 18704.32991668

Solvation Ediel\_sol = 0.00000000

-----

free energy TOTEN = -1202.77109710 eV

energy without entropy = -1202.77109710 energy(sigma->0) = -1202.77109710

-----

----- Iteration 9( 10) -----

POTLOK: cpu time 0.1646: real time 0.1832

SETDIJ: cpu time 0.0100: real time 0.0101

|           |          |         |           |        |
|-----------|----------|---------|-----------|--------|
| EDDIAG:   | cpu time | 1.9265: | real time | 1.9325 |
| RMM-DIIS: | cpu time | 5.0499: | real time | 5.0721 |
| ORTHCH:   | cpu time | 0.3534: | real time | 0.3543 |
| DOS:      | cpu time | 0.0004: | real time | 0.0004 |
| CHARGE:   | cpu time | 0.5270: | real time | 0.5285 |
| MIXING:   | cpu time | 0.0074: | real time | 0.0074 |
| -----     |          |         |           |        |
| LOOP:     | cpu time | 8.0393: | real time | 8.0886 |

eigenvalue-minimisations : 1372

total energy-change (2. order) :-0.3401743E-05 (-0.7747360E-08)

number of electron 518.9999717 magnetization 0.9999998

augmentation part 11.7377020 magnetization 0.0542724

Broyden mixing:

rms(total) = 0.42582E-04 rms(broyden)= 0.42574E-04

rms(prec ) = 0.65016E-04

weight for this iteration 100.00

eigenvalues of (default mixing \* dielectric matrix)

average eigenvalue GAMMA= 1.4414

3.1707 2.5124 1.6843 1.4549 0.9402 0.9402 0.9363 0.7068 0.6269

Free energy of the ion-electron system (eV)

---

alpha Z        PSCENC =        233.50077011

Ewald energy    TEWEN =        91329.99480157

-Hartree energ DENC =    -107336.72846849

-exchange       EXHF =            0.00000000

-V(xc)+E(xc)    XCENC =        1743.80619806

PAW double counting =    52179.17114116    -52242.09141362

entropy T\*S     EENTRO =        -0.00000000

eigenvalues     EBANDS =        -5814.75404598

atomic energy   EATOM =        18704.32991668

Solvation    Ediel\_sol =        0.00000000

---

free energy     TOTEN =        -1202.77110050 eV

energy without entropy =    -1202.77110050    energy(sigma->0) =    -1202.77110050

---

----- Iteration 9( 11) -----

|           |          |         |           |        |
|-----------|----------|---------|-----------|--------|
| POTLOK:   | cpu time | 0.1638: | real time | 0.1758 |
| SETDIJ:   | cpu time | 0.0100: | real time | 0.0101 |
| EDDIAG:   | cpu time | 1.9270: | real time | 1.9333 |
| RMM-DIIS: | cpu time | 5.1263: | real time | 5.1445 |
| ORTHCH:   | cpu time | 0.3529: | real time | 0.3538 |
| DOS:      | cpu time | 0.0004: | real time | 0.0004 |
| CHARGE:   | cpu time | 0.5268: | real time | 0.5282 |
| MIXING:   | cpu time | 0.0077: | real time | 0.0077 |
| -----     |          |         |           |        |
| LOOP:     | cpu time | 8.1148: | real time | 8.1537 |

eigenvalue-minimisations : 1411

total energy-change (2. order) :-0.3861001E-05 (-0.1241886E-07)

number of electron 518.9999717 magnetization 0.9999998

augmentation part 11.7376912 magnetization 0.0542723

Broyden mixing:

rms(total) = 0.45803E-04      rms(broyden)= 0.45756E-04

rms(prec ) = 0.55507E-04

weight for this iteration      100.00

eigenvalues of (default mixing \* dielectric matrix)

average eigenvalue GAMMA=    1.5395

4.0852   2.5470   2.0206   1.7704   0.9263   0.9263   0.9956   0.8253   0.6804   0.6181

Free energy of the ion-electron system (eV)

-----

alpha Z          PSCENC =          233.50077011

Ewald energy    TEWEN =          91329.99480157

-Hartree energy DENC =   -107336.74224850

-exchange        EXHF =            0.00000000

-V(xc)+E(xc)    XCENC =          1743.80633808

PAW double counting =    52179.16367385   -52242.08396786

entropy T\*S     EENTRO =          -0.00000000

eigenvalues     EBANDS =          -5814.74038829

atomic energy   EATOM =          18704.32991668

Solvation    Ediel\_sol =          0.00000000

-----

free energy     TOTEN =          -1202.77110436 eV

energy without entropy = -1202.77110436 energy(sigma->0) = -1202.77110436

-----

----- Iteration 9( 12) -----

|           |          |         |           |        |
|-----------|----------|---------|-----------|--------|
| POTLOK:   | cpu time | 0.1636: | real time | 0.1646 |
| SETDIJ:   | cpu time | 0.0100: | real time | 0.0100 |
| EDDIAG:   | cpu time | 1.9340: | real time | 1.9401 |
| RMM-DIIS: | cpu time | 4.6911: | real time | 4.7304 |
| ORTHCH:   | cpu time | 0.3519: | real time | 0.3530 |
| DOS:      | cpu time | 0.0004: | real time | 0.0004 |
| CHARGE:   | cpu time | 0.5251: | real time | 0.5271 |
| MIXING:   | cpu time | 0.0076: | real time | 0.0076 |

-----

|       |          |         |           |        |
|-------|----------|---------|-----------|--------|
| LOOP: | cpu time | 7.6836: | real time | 7.7331 |
|-------|----------|---------|-----------|--------|

eigenvalue-minimisations : 1256

total energy-change (2. order) :-0.2120614E-05 (-0.3380649E-08)

number of electron      518.9999717 magnetization      0.9999998

augmentation part      11.7376960 magnetization      0.0542723

Broyden mixing:

rms(total) = 0.15520E-04      rms(broyden)= 0.15500E-04

rms(prec ) = 0.22561E-04

weight for this iteration      100.00

eigenvalues of (default mixing \* dielectric matrix)

average eigenvalue GAMMA=      1.6183

5.1089   2.5823   2.3305   1.7567   0.9484   0.9484   1.0031   1.0031   0.8278   0.6744

0.6175

Free energy of the ion-electron system (eV)

-----

alpha Z      PSCENC =      233.50077011

Ewald energy      TEWEN =      91329.99480157

-Hartree energ DENC      =      -107336.74899295

-exchange      EXHF =      0.00000000

-V(xc)+E(xc) XCENC = 1743.80634651

PAW double counting = 52179.15742871 -52242.07771417

entropy T\*S EENTRO = -0.00000000

eigenvalues EBANDS = -5814.73366294

atomic energy EATOM = 18704.32991668

Solvation Ediel\_sol = 0.00000000

-----

free energy TOTEN = -1202.77110648 eV

energy without entropy = -1202.77110648 energy(sigma->0) = -1202.77110648

-----

----- Iteration 9( 13) -----

POTLOK: cpu time 0.1649: real time 0.1714

SETDIJ: cpu time 0.0103: real time 0.0103

|           |          |         |           |        |
|-----------|----------|---------|-----------|--------|
| EDDIAG:   | cpu time | 1.9249: | real time | 1.9312 |
| RMM-DIIS: | cpu time | 4.6482: | real time | 4.6631 |
| ORTHCH:   | cpu time | 0.3517: | real time | 0.3527 |
| DOS:      | cpu time | 0.0004: | real time | 0.0004 |
| CHARGE:   | cpu time | 0.5273: | real time | 0.5288 |
| MIXING:   | cpu time | 0.0077: | real time | 0.0077 |
| -----     |          |         |           |        |
| LOOP:     | cpu time | 7.6354: | real time | 7.6656 |

eigenvalue-minimisations : 1230

total energy-change (2. order) :-0.1290311E-05 (-0.1693089E-08)

number of electron      518.9999717 magnetization      0.9999998

augmentation part      11.7376988 magnetization      0.0542723

Broyden mixing:

rms(total) = 0.93735E-05      rms(broyden)= 0.93489E-05

rms(prec ) = 0.13964E-04

weight for this iteration      100.00

eigenvalues of (default mixing \* dielectric matrix)

average eigenvalue GAMMA=      1.6561

5.8660 2.6321 2.3608 1.6136 1.6136 0.9455 0.9455 0.9923 0.8828 0.7392

0.6630 0.6183

Free energy of the ion-electron system (eV)

-----

|                     |             |                                |
|---------------------|-------------|--------------------------------|
| alpha Z             | PSCENC =    | 233.50077011                   |
| Ewald energy        | TEWEN =     | 91329.99480157                 |
| -Hartree energy     | DENC =      | -107336.75223280               |
| -exchange           | EXHF =      | 0.00000000                     |
| -V(xc)+E(xc)        | XCENC =     | 1743.80634614                  |
| PAW double counting | =           | 52179.15536535 -52242.07564561 |
| entropy T*S         | EENTRO =    | -0.00000000                    |
| eigenvalues         | EBANDS =    | -5814.73042921                 |
| atomic energy       | EATOM =     | 18704.32991668                 |
| Solvation           | Ediel_sol = | 0.00000000                     |

-----

free energy TOTEN = -1202.77110777 eV

energy without entropy = -1202.77110777 energy(sigma->0) = -1202.77110777

-----

----- Iteration 9( 14) -----

|           |          |         |           |        |
|-----------|----------|---------|-----------|--------|
| POTLOK:   | cpu time | 0.1661: | real time | 0.1856 |
| SETDIJ:   | cpu time | 0.0100: | real time | 0.0100 |
| EDDIAG:   | cpu time | 1.9252: | real time | 1.9312 |
| RMM-DIIS: | cpu time | 4.4064: | real time | 4.4204 |
| ORTHCH:   | cpu time | 0.3541: | real time | 0.3550 |
| DOS:      | cpu time | 0.0004: | real time | 0.0004 |
| CHARGE:   | cpu time | 0.5275: | real time | 0.5293 |
| MIXING:   | cpu time | 0.0083: | real time | 0.0083 |

-----

|       |          |         |           |        |
|-------|----------|---------|-----------|--------|
| LOOP: | cpu time | 7.3981: | real time | 7.4402 |
|-------|----------|---------|-----------|--------|

eigenvalue-minimisations : 1106

total energy-change (2. order) :-0.7251365E-06 (-0.5900080E-09)

|                    |             |               |           |
|--------------------|-------------|---------------|-----------|
| number of electron | 518.9999717 | magnetization | 0.9999998 |
|--------------------|-------------|---------------|-----------|

|                   |            |               |           |
|-------------------|------------|---------------|-----------|
| augmentation part | 11.7376982 | magnetization | 0.0542723 |
|-------------------|------------|---------------|-----------|

Broyden mixing:

rms(total) = 0.54163E-05      rms(broyden)= 0.54149E-05

rms(prec ) = 0.90962E-05

weight for this iteration      100.00

eigenvalues of (default mixing \* dielectric matrix)

average eigenvalue GAMMA=    1.7214

6.5229   2.6972   2.3239   2.1003   1.8620   1.0690   1.0690   0.9399   0.9399   0.8776

0.7114   0.6175   0.6482

Free energy of the ion-electron system (eV)

-----

alpha Z            PSCENC =            233.50077011

Ewald energy      TEWEN   =            91329.99480157

-Hartree energy DENC   =   -107336.75341963

-exchange           EXHF     =            0.00000000

-V(xc)+E(xc)      XCENC   =            1743.80635141

PAW double counting   =   52179.15567500   -52242.07595609

entropy T\*S        EENTRO =            -0.00000000

eigenvalues        EBANDS =            -5814.72924756

atomic energy      EATOM   =            18704.32991668

Solvation    Ediel\_sol   =            0.00000000

-----  
free energy    TOTEN    =    -1202.77110849 eV

energy without entropy =    -1202.77110849    energy(sigma->0) =    -1202.77110849

----- Iteration            9( 15) -----

|           |          |         |           |        |
|-----------|----------|---------|-----------|--------|
| POTLOK:   | cpu time | 0.1723: | real time | 0.1818 |
| SETDIJ:   | cpu time | 0.0102: | real time | 0.0102 |
| EDDIAG:   | cpu time | 1.9281: | real time | 1.9339 |
| RMM-DIIS: | cpu time | 4.6068: | real time | 4.6194 |
| ORTHCH:   | cpu time | 0.3536: | real time | 0.3546 |
| DOS:      | cpu time | 0.0004: | real time | 0.0003 |
| CHARGE:   | cpu time | 0.5271: | real time | 0.5286 |
| MIXING:   | cpu time | 0.0087: | real time | 0.0087 |

-----  
LOOP:  cpu time    7.6070: real time    7.6376

eigenvalue-minimisations : 1203

total energy-change (2. order) :-0.7044800E-06  (-0.7706298E-09)

number of electron    518.9999717 magnetization        0.9999998

augmentation part    11.7376977 magnetization        0.0542723

Broyden mixing:

rms(total) = 0.39530E-05    rms(broyden)= 0.39501E-05

rms(prec ) = 0.57370E-05

weight for this iteration    100.00

eigenvalues of (default mixing \* dielectric matrix)

average eigenvalue GAMMA=    1.7899

7.2710  3.3063  2.5428  2.1602  1.7329  1.1884  1.1884  0.9497  0.9497  0.9692

0.8454  0.6962  0.6184  0.6396

Free energy of the ion-electron system (eV)

-----  
alpha Z           PSCENC =        233.50077011

Ewald energy    TEWEN  =        91329.99480157

-Hartree energ DENC = -107336.75428956

-exchange EXHF = 0.00000000

-V(xc)+E(xc) XCENC = 1743.80635021

PAW double counting = 52179.15639172 -52242.07667326

entropy T\*S EENTRO = -0.00000000

eigenvalues EBANDS = -5814.72837668

atomic energy EATOM = 18704.32991668

Solvation Ediel\_sol = 0.00000000

-----  
free energy TOTEN = -1202.77110920 eV

energy without entropy = -1202.77110920 energy(sigma->0) = -1202.77110920

|           |          |         |           |        |
|-----------|----------|---------|-----------|--------|
| POTLOK:   | cpu time | 0.1705: | real time | 0.1715 |
| SETDIJ:   | cpu time | 0.0100: | real time | 0.0100 |
| EDDIAG:   | cpu time | 1.9310: | real time | 1.9376 |
| RMM-DIIS: | cpu time | 4.2390: | real time | 4.2590 |
| ORTHCH:   | cpu time | 0.3557: | real time | 0.3566 |
| DOS:      | cpu time | 0.0004: | real time | 0.0004 |
| CHARGE:   | cpu time | 0.5275: | real time | 0.5292 |
| MIXING:   | cpu time | 0.0090: | real time | 0.0090 |
| -----     |          |         |           |        |
| LOOP:     | cpu time | 7.2429: | real time | 7.2733 |

eigenvalue-minimisations : 1044

total energy-change (2. order) :-0.2212691E-06 (-0.3020570E-09)

number of electron 518.9999717 magnetization 0.9999998

augmentation part 11.7376984 magnetization 0.0542723

Broyden mixing:

rms(total) = 0.32558E-05 rms(broyden)= 0.32522E-05

rms(prec ) = 0.41645E-05

weight for this iteration 100.00

eigenvalues of (default mixing \* dielectric matrix)

average eigenvalue GAMMA= 1.8413

7.7676 3.8844 2.5573 2.1913 1.8173 1.8173 1.0527 1.0527 0.9430 0.9430

0.8708 0.7782 0.6880 0.6202 0.6363

Free energy of the ion-electron system (eV)

-----

alpha Z PSCENC = 233.50077011

Ewald energy TEWEN = 91329.99480157

-Hartree energ DENC = -107336.75450542

-exchange EXHF = 0.00000000

-V(xc)+E(xc) XCENC = 1743.80634214

PAW double counting = 52179.15634018 -52242.07662039

entropy T\*S EENTRO = -0.00000000

eigenvalues EBANDS = -5814.72815430

atomic energy EATOM = 18704.32991668

Solvation Ediel\_sol = 0.00000000

-----

free energy TOTEN = -1202.77110942 eV

energy without entropy = -1202.77110942 energy(sigma->0) = -1202.77110942

-----

----- Iteration 9( 17) -----

|           |          |         |           |        |
|-----------|----------|---------|-----------|--------|
| POTLOK:   | cpu time | 0.1660: | real time | 0.1719 |
| SETDIJ:   | cpu time | 0.0100: | real time | 0.0100 |
| EDDIAG:   | cpu time | 1.9285: | real time | 1.9347 |
| RMM-DIIS: | cpu time | 4.1667: | real time | 4.1886 |
| ORTHCH:   | cpu time | 0.3571: | real time | 0.3583 |
| DOS:      | cpu time | 0.0003: | real time | 0.0003 |

-----

|       |          |         |           |        |
|-------|----------|---------|-----------|--------|
| LOOP: | cpu time | 6.6286: | real time | 6.6639 |
|-------|----------|---------|-----------|--------|

eigenvalue-minimisations : 963

total energy-change (2. order) :-0.8141069E-07 (-0.1034053E-09)

|                    |             |               |           |
|--------------------|-------------|---------------|-----------|
| number of electron | 518.9999717 | magnetization | 0.9999998 |
|--------------------|-------------|---------------|-----------|

|                   |            |               |           |
|-------------------|------------|---------------|-----------|
| augmentation part | 11.7376984 | magnetization | 0.0542723 |
|-------------------|------------|---------------|-----------|

Free energy of the ion-electron system (eV)

-----

alpha Z        PSCENC =        233.50077011

Ewald energy    TEWEN =        91329.99480157

-Hartree energy DENC =   -107336.75447821

-exchange       EXHF =            0.00000000

-V(xc)+E(xc)    XCENC =        1743.80634141

PAW double counting =    52179.15622873   -52242.07650972

entropy T\*S     EENTRO =        -0.00000000

eigenvalues     EBANDS =       -5814.72818007

atomic energy   EATOM =        18704.32991668

Solvation    Ediel\_sol =        0.00000000

-----

free energy     TOTEN =       -1202.77110950 eV

energy without entropy =   -1202.77110950    energy(sigma->0) =   -1202.77110950

-----

average (electrostatic) potential at core

the test charge radii are      0.5201   0.6991   1.0621   0.7215

(the norm of the test charge is                      1.0000)

|             |             |             |             |             |
|-------------|-------------|-------------|-------------|-------------|
| 1 -40.7525  | 2 -40.7504  | 3 -40.7518  | 4 -40.7505  | 5 -40.7525  |
| 6 -40.7547  | 7 -40.7522  | 8 -40.7599  | 9 -40.7518  | 10 -40.7595 |
| 11 -40.7532 | 12 -40.7553 | 13 -40.6496 | 14 -40.6957 | 15 -40.7691 |
| 16 -40.6978 | 17 -40.6914 | 18 -40.8625 | 19 -40.6788 | 20 -40.6669 |
| 21 -40.6883 | 22 -40.6609 | 23 -40.0814 | 24 -40.1261 | 25 -57.4586 |
| 26 -57.6697 | 27 -57.6566 | 28 -57.4684 | 29 -57.6632 | 30 -57.4585 |
| 31 -57.6695 | 32 -57.6562 | 33 -57.4664 | 34 -57.6680 | 35 -57.4593 |
| 36 -57.6713 | 37 -57.6562 | 38 -57.4686 | 39 -57.6740 | 40 -57.4584 |
| 41 -57.6754 | 42 -57.6564 | 43 -57.4735 | 44 -57.6885 | 45 -57.4584 |
| 46 -57.6743 | 47 -57.6572 | 48 -57.4738 | 49 -57.6796 | 50 -57.4596 |
| 51 -57.6710 | 52 -57.6569 | 53 -57.4714 | 54 -57.6660 | 55 -57.6364 |
| 56 -57.6624 | 57 -57.6867 | 58 -57.6830 | 59 -57.6661 | 60 -57.6689 |
| 61 -57.6897 | 62 -57.6744 | 63 -57.6366 | 64 -57.6618 | 65 -57.6888 |
| 66 -57.6944 | 67 -57.6643 | 68 -57.6687 | 69 -57.6935 | 70 -57.7007 |
| 71 -57.6361 | 72 -57.6632 | 73 -57.6965 | 74 -57.7216 | 75 -57.6652 |
| 76 -57.6693 | 77 -57.7058 | 78 -57.7514 | 79 -57.6363 | 80 -57.6658 |
| 81 -57.7102 | 82 -57.7519 | 83 -57.6685 | 84 -57.6708 | 85 -57.7372 |
| 86 -57.8413 | 87 -57.6387 | 88 -57.6665 | 89 -57.7121 | 90 -57.7167 |

|              |              |              |              |              |
|--------------|--------------|--------------|--------------|--------------|
| 91 -57.6732  | 92 -57.6711  | 93 -57.7420  | 94 -57.7591  | 95 -57.6371  |
| 96 -57.6647  | 97 -57.6958  | 98 -57.6903  | 99 -57.6705  | 100 -57.6698 |
| 101 -57.7075 | 102 -57.6856 | 103 -57.6599 | 104 -57.6305 | 105 -57.6452 |
| 106 -57.2894 | 107 -57.3876 | 108 -57.6308 | 109 -57.5971 | 110 -57.6588 |
| 111 -57.6304 | 112 -57.6418 | 113 -57.3083 | 114 -57.3933 | 115 -57.6300 |
| 116 -57.5989 | 117 -57.6580 | 118 -57.6221 | 119 -57.6979 | 120 -57.6825 |
| 121 -57.3869 | 122 -57.6288 | 123 -57.7089 | 124 -57.6590 | 125 -57.6249 |
| 126 -57.8338 | 127 -58.3274 | 128 -57.3602 | 129 -57.6341 | 130 -58.1448 |
| 131 -57.6669 | 132 -57.6342 | 133 -57.7995 | 134 -57.4164 | 135 -57.3715 |
| 136 -57.6381 | 137 -58.0765 | 138 -57.6634 | 139 -57.6299 | 140 -57.6709 |
| 141 -57.2987 | 142 -57.3777 | 143 -57.6334 | 144 -57.6475 | 145 -60.8509 |
| 146 -57.3124 | 147 -81.2833 |              |              |              |

E-fermi : -2.3342      XC(G=0): -2.7343      alpha+bet : -2.2521

spin component 1

k-point      1 :      0.0000      0.0000      0.0000

band No.    band energies      occupation

|    |          |         |
|----|----------|---------|
| 1  | -27.0132 | 1.00000 |
| 2  | -21.5682 | 1.00000 |
| 3  | -21.4713 | 1.00000 |
| 4  | -21.0994 | 1.00000 |
| 5  | -21.0684 | 1.00000 |
| 6  | -21.0145 | 1.00000 |
| 7  | -20.9785 | 1.00000 |
| 8  | -20.9765 | 1.00000 |
| 9  | -20.8908 | 1.00000 |
| 10 | -20.5575 | 1.00000 |
| 11 | -20.5031 | 1.00000 |
| 12 | -20.4114 | 1.00000 |
| 13 | -20.3978 | 1.00000 |
| 14 | -20.1262 | 1.00000 |
| 15 | -19.9756 | 1.00000 |
| 16 | -19.7031 | 1.00000 |
| 17 | -19.6273 | 1.00000 |
| 18 | -19.5994 | 1.00000 |
| 19 | -19.5837 | 1.00000 |
| 20 | -19.5284 | 1.00000 |
| 21 | -19.5266 | 1.00000 |
| 22 | -19.4984 | 1.00000 |

|    |          |         |
|----|----------|---------|
| 23 | -19.4809 | 1.00000 |
| 24 | -19.1118 | 1.00000 |
| 25 | -19.0751 | 1.00000 |
| 26 | -18.9783 | 1.00000 |
| 27 | -18.9646 | 1.00000 |
| 28 | -18.9004 | 1.00000 |
| 29 | -18.7333 | 1.00000 |
| 30 | -18.5045 | 1.00000 |
| 31 | -18.3589 | 1.00000 |
| 32 | -18.2751 | 1.00000 |
| 33 | -18.2519 | 1.00000 |
| 34 | -18.1833 | 1.00000 |
| 35 | -18.1812 | 1.00000 |
| 36 | -18.0796 | 1.00000 |
| 37 | -18.0758 | 1.00000 |
| 38 | -17.5616 | 1.00000 |
| 39 | -17.3131 | 1.00000 |
| 40 | -17.2874 | 1.00000 |
| 41 | -17.2825 | 1.00000 |
| 42 | -17.2098 | 1.00000 |
| 43 | -17.2033 | 1.00000 |
| 44 | -17.1766 | 1.00000 |

|    |          |         |
|----|----------|---------|
| 45 | -17.0226 | 1.00000 |
| 46 | -16.9501 | 1.00000 |
| 47 | -16.9324 | 1.00000 |
| 48 | -16.8930 | 1.00000 |
| 49 | -16.8911 | 1.00000 |
| 50 | -16.8499 | 1.00000 |
| 51 | -16.8415 | 1.00000 |
| 52 | -16.8209 | 1.00000 |
| 53 | -16.8187 | 1.00000 |
| 54 | -16.7292 | 1.00000 |
| 55 | -16.7260 | 1.00000 |
| 56 | -16.1773 | 1.00000 |
| 57 | -15.7294 | 1.00000 |
| 58 | -15.6918 | 1.00000 |
| 59 | -15.6601 | 1.00000 |
| 60 | -15.6368 | 1.00000 |
| 61 | -15.6160 | 1.00000 |
| 62 | -15.5535 | 1.00000 |
| 63 | -15.5496 | 1.00000 |
| 64 | -15.1747 | 1.00000 |
| 65 | -14.8095 | 1.00000 |
| 66 | -14.6083 | 1.00000 |

|    |          |         |
|----|----------|---------|
| 67 | -14.5779 | 1.00000 |
| 68 | -14.5347 | 1.00000 |
| 69 | -14.4981 | 1.00000 |
| 70 | -14.4683 | 1.00000 |
| 71 | -14.4422 | 1.00000 |
| 72 | -14.3337 | 1.00000 |
| 73 | -14.3054 | 1.00000 |
| 74 | -14.2795 | 1.00000 |
| 75 | -14.2719 | 1.00000 |
| 76 | -14.1823 | 1.00000 |
| 77 | -14.1784 | 1.00000 |
| 78 | -13.8898 | 1.00000 |
| 79 | -13.7597 | 1.00000 |
| 80 | -13.5933 | 1.00000 |
| 81 | -13.5482 | 1.00000 |
| 82 | -13.5292 | 1.00000 |
| 83 | -13.4975 | 1.00000 |
| 84 | -13.4457 | 1.00000 |
| 85 | -13.3639 | 1.00000 |
| 86 | -13.3453 | 1.00000 |
| 87 | -13.1888 | 1.00000 |
| 88 | -12.7862 | 1.00000 |

|     |          |         |
|-----|----------|---------|
| 89  | -12.7593 | 1.00000 |
| 90  | -12.7272 | 1.00000 |
| 91  | -12.6959 | 1.00000 |
| 92  | -12.6861 | 1.00000 |
| 93  | -12.6237 | 1.00000 |
| 94  | -12.4609 | 1.00000 |
| 95  | -12.4461 | 1.00000 |
| 96  | -12.3818 | 1.00000 |
| 97  | -12.3238 | 1.00000 |
| 98  | -12.2128 | 1.00000 |
| 99  | -12.2032 | 1.00000 |
| 100 | -12.1649 | 1.00000 |
| 101 | -11.9489 | 1.00000 |
| 102 | -11.6848 | 1.00000 |
| 103 | -11.6281 | 1.00000 |
| 104 | -11.6109 | 1.00000 |
| 105 | -11.5803 | 1.00000 |
| 106 | -11.1072 | 1.00000 |
| 107 | -11.0758 | 1.00000 |
| 108 | -10.8987 | 1.00000 |
| 109 | -10.8875 | 1.00000 |
| 110 | -10.8322 | 1.00000 |

|     |          |         |
|-----|----------|---------|
| 111 | -10.7106 | 1.00000 |
| 112 | -10.6804 | 1.00000 |
| 113 | -10.6623 | 1.00000 |
| 114 | -10.6464 | 1.00000 |
| 115 | -10.5892 | 1.00000 |
| 116 | -10.5808 | 1.00000 |
| 117 | -10.5715 | 1.00000 |
| 118 | -10.5677 | 1.00000 |
| 119 | -10.5260 | 1.00000 |
| 120 | -10.5252 | 1.00000 |
| 121 | -10.5104 | 1.00000 |
| 122 | -10.5026 | 1.00000 |
| 123 | -10.3784 | 1.00000 |
| 124 | -10.2946 | 1.00000 |
| 125 | -10.2566 | 1.00000 |
| 126 | -10.1875 | 1.00000 |
| 127 | -10.1863 | 1.00000 |
| 128 | -10.0816 | 1.00000 |
| 129 | -10.0395 | 1.00000 |
| 130 | -9.8918  | 1.00000 |
| 131 | -9.8657  | 1.00000 |
| 132 | -9.7945  | 1.00000 |

|     |         |         |
|-----|---------|---------|
| 133 | -9.7859 | 1.00000 |
| 134 | -9.7585 | 1.00000 |
| 135 | -9.6933 | 1.00000 |
| 136 | -9.4500 | 1.00000 |
| 137 | -9.4254 | 1.00000 |
| 138 | -9.3949 | 1.00000 |
| 139 | -9.3878 | 1.00000 |
| 140 | -9.3798 | 1.00000 |
| 141 | -9.3691 | 1.00000 |
| 142 | -9.3103 | 1.00000 |
| 143 | -9.3039 | 1.00000 |
| 144 | -9.3001 | 1.00000 |
| 145 | -9.2852 | 1.00000 |
| 146 | -9.2702 | 1.00000 |
| 147 | -9.0919 | 1.00000 |
| 148 | -9.0041 | 1.00000 |
| 149 | -8.9873 | 1.00000 |
| 150 | -8.9569 | 1.00000 |
| 151 | -8.9563 | 1.00000 |
| 152 | -8.7929 | 1.00000 |
| 153 | -8.7454 | 1.00000 |
| 154 | -8.7342 | 1.00000 |

|     |         |         |
|-----|---------|---------|
| 155 | -8.7177 | 1.00000 |
| 156 | -8.7085 | 1.00000 |
| 157 | -8.6869 | 1.00000 |
| 158 | -8.6779 | 1.00000 |
| 159 | -8.6682 | 1.00000 |
| 160 | -8.6535 | 1.00000 |
| 161 | -8.5943 | 1.00000 |
| 162 | -8.5825 | 1.00000 |
| 163 | -8.5759 | 1.00000 |
| 164 | -8.5675 | 1.00000 |
| 165 | -8.4875 | 1.00000 |
| 166 | -8.4570 | 1.00000 |
| 167 | -8.4356 | 1.00000 |
| 168 | -8.3451 | 1.00000 |
| 169 | -8.2971 | 1.00000 |
| 170 | -8.2745 | 1.00000 |
| 171 | -8.2634 | 1.00000 |
| 172 | -8.2329 | 1.00000 |
| 173 | -8.2318 | 1.00000 |
| 174 | -8.1512 | 1.00000 |
| 175 | -8.1448 | 1.00000 |
| 176 | -8.0773 | 1.00000 |

|     |         |         |
|-----|---------|---------|
| 177 | -8.0440 | 1.00000 |
| 178 | -8.0258 | 1.00000 |
| 179 | -8.0213 | 1.00000 |
| 180 | -7.9727 | 1.00000 |
| 181 | -7.9641 | 1.00000 |
| 182 | -7.9240 | 1.00000 |
| 183 | -7.9002 | 1.00000 |
| 184 | -7.8847 | 1.00000 |
| 185 | -7.8719 | 1.00000 |
| 186 | -7.8003 | 1.00000 |
| 187 | -7.7969 | 1.00000 |
| 188 | -7.7471 | 1.00000 |
| 189 | -7.7102 | 1.00000 |
| 190 | -7.6658 | 1.00000 |
| 191 | -7.5994 | 1.00000 |
| 192 | -7.5844 | 1.00000 |
| 193 | -7.5754 | 1.00000 |
| 194 | -7.5468 | 1.00000 |
| 195 | -7.4802 | 1.00000 |
| 196 | -7.4796 | 1.00000 |
| 197 | -7.4279 | 1.00000 |
| 198 | -7.3239 | 1.00000 |

|     |         |         |
|-----|---------|---------|
| 199 | -7.2489 | 1.00000 |
| 200 | -7.1551 | 1.00000 |
| 201 | -7.0659 | 1.00000 |
| 202 | -7.0416 | 1.00000 |
| 203 | -7.0277 | 1.00000 |
| 204 | -7.0130 | 1.00000 |
| 205 | -6.9961 | 1.00000 |
| 206 | -6.9892 | 1.00000 |
| 207 | -6.9749 | 1.00000 |
| 208 | -6.8661 | 1.00000 |
| 209 | -6.8202 | 1.00000 |
| 210 | -6.8011 | 1.00000 |
| 211 | -6.7926 | 1.00000 |
| 212 | -6.7316 | 1.00000 |
| 213 | -6.6859 | 1.00000 |
| 214 | -6.4705 | 1.00000 |
| 215 | -6.4246 | 1.00000 |
| 216 | -6.3956 | 1.00000 |
| 217 | -6.3907 | 1.00000 |
| 218 | -6.3736 | 1.00000 |
| 219 | -6.3720 | 1.00000 |
| 220 | -6.3167 | 1.00000 |

|     |         |         |
|-----|---------|---------|
| 221 | -6.3068 | 1.00000 |
| 222 | -6.2364 | 1.00000 |
| 223 | -6.2292 | 1.00000 |
| 224 | -6.2288 | 1.00000 |
| 225 | -6.0771 | 1.00000 |
| 226 | -6.0372 | 1.00000 |
| 227 | -5.7921 | 1.00000 |
| 228 | -5.7518 | 1.00000 |
| 229 | -5.6934 | 1.00000 |
| 230 | -5.6407 | 1.00000 |
| 231 | -5.6366 | 1.00000 |
| 232 | -5.5585 | 1.00000 |
| 233 | -5.5299 | 1.00000 |
| 234 | -5.4673 | 1.00000 |
| 235 | -5.4388 | 1.00000 |
| 236 | -5.1647 | 1.00000 |
| 237 | -5.0582 | 1.00000 |
| 238 | -5.0500 | 1.00000 |
| 239 | -5.0178 | 1.00000 |
| 240 | -4.9885 | 1.00000 |
| 241 | -4.9098 | 1.00000 |
| 242 | -4.8531 | 1.00000 |

|     |         |         |
|-----|---------|---------|
| 243 | -4.8220 | 1.00000 |
| 244 | -4.7893 | 1.00000 |
| 245 | -4.6802 | 1.00000 |
| 246 | -4.5722 | 1.00000 |
| 247 | -4.5708 | 1.00000 |
| 248 | -4.5051 | 1.00000 |
| 249 | -4.4451 | 1.00000 |
| 250 | -4.3833 | 1.00000 |
| 251 | -4.2924 | 1.00000 |
| 252 | -4.2653 | 1.00000 |
| 253 | -4.2123 | 1.00000 |
| 254 | -3.5582 | 1.00000 |
| 255 | -3.3541 | 1.00000 |
| 256 | -3.2002 | 1.00000 |
| 257 | -2.9389 | 1.00000 |
| 258 | -2.8479 | 1.00000 |
| 259 | -2.8232 | 1.00000 |
| 260 | -2.6062 | 1.00000 |
| 261 | -1.9082 | 0.00000 |
| 262 | -1.7672 | 0.00000 |
| 263 | -1.7184 | 0.00000 |
| 264 | -1.3435 | 0.00000 |

|     |         |         |
|-----|---------|---------|
| 265 | -1.2981 | 0.00000 |
| 266 | -1.1864 | 0.00000 |
| 267 | -0.7436 | 0.00000 |
| 268 | -0.5842 | 0.00000 |
| 269 | -0.5012 | 0.00000 |
| 270 | -0.3074 | 0.00000 |
| 271 | -0.3053 | 0.00000 |
| 272 | -0.2896 | 0.00000 |
| 273 | -0.1825 | 0.00000 |
| 274 | -0.0573 | 0.00000 |
| 275 | -0.0488 | 0.00000 |
| 276 | -0.0098 | 0.00000 |
| 277 | 0.0354  | 0.00000 |
| 278 | 0.0850  | 0.00000 |
| 279 | 0.1734  | 0.00000 |
| 280 | 0.2208  | 0.00000 |
| 281 | 0.2485  | 0.00000 |
| 282 | 0.4210  | 0.00000 |
| 283 | 0.4485  | 0.00000 |
| 284 | 0.4821  | 0.00000 |
| 285 | 0.5983  | 0.00000 |
| 286 | 0.6757  | 0.00000 |

|     |        |         |
|-----|--------|---------|
| 287 | 0.8190 | 0.00000 |
| 288 | 0.8735 | 0.00000 |
| 289 | 1.0465 | 0.00000 |
| 290 | 1.0846 | 0.00000 |
| 291 | 1.1210 | 0.00000 |
| 292 | 1.1629 | 0.00000 |
| 293 | 1.2234 | 0.00000 |
| 294 | 1.2445 | 0.00000 |
| 295 | 1.2875 | 0.00000 |
| 296 | 1.3142 | 0.00000 |
| 297 | 1.3463 | 0.00000 |
| 298 | 1.4117 | 0.00000 |
| 299 | 1.4658 | 0.00000 |
| 300 | 1.4836 | 0.00000 |
| 301 | 1.5531 | 0.00000 |
| 302 | 1.5869 | 0.00000 |
| 303 | 1.6252 | 0.00000 |
| 304 | 1.6777 | 0.00000 |
| 305 | 1.7508 | 0.00000 |
| 306 | 1.7634 | 0.00000 |
| 307 | 1.8735 | 0.00000 |
| 308 | 1.8950 | 0.00000 |

|     |        |         |
|-----|--------|---------|
| 309 | 1.9051 | 0.00000 |
| 310 | 1.9135 | 0.00000 |
| 311 | 2.1235 | 0.00000 |
| 312 | 2.1868 | 0.00000 |
| 313 | 2.2085 | 0.00000 |
| 314 | 2.2355 | 0.00000 |
| 315 | 2.2758 | 0.00000 |
| 316 | 2.2918 | 0.00000 |
| 317 | 2.3315 | 0.00000 |
| 318 | 2.3537 | 0.00000 |
| 319 | 2.3723 | 0.00000 |
| 320 | 2.3977 | 0.00000 |
| 321 | 2.4204 | 0.00000 |
| 322 | 2.4300 | 0.00000 |
| 323 | 2.4402 | 0.00000 |
| 324 | 2.4535 | 0.00000 |
| 325 | 2.4616 | 0.00000 |
| 326 | 2.5239 | 0.00000 |
| 327 | 2.5373 | 0.00000 |
| 328 | 2.7010 | 0.00000 |
| 329 | 2.7286 | 0.00000 |
| 330 | 2.7533 | 0.00000 |

|     |        |         |
|-----|--------|---------|
| 331 | 2.7565 | 0.00000 |
| 332 | 2.7644 | 0.00000 |
| 333 | 2.8147 | 0.00000 |
| 334 | 2.8342 | 0.00000 |
| 335 | 2.8589 | 0.00000 |
| 336 | 2.8912 | 0.00000 |
| 337 | 2.9243 | 0.00000 |
| 338 | 2.9464 | 0.00000 |
| 339 | 2.9785 | 0.00000 |
| 340 | 3.0051 | 0.00000 |
| 341 | 3.0341 | 0.00000 |
| 342 | 3.0443 | 0.00000 |
| 343 | 3.0660 | 0.00000 |
| 344 | 3.0849 | 0.00000 |
| 345 | 3.1498 | 0.00000 |
| 346 | 3.1630 | 0.00000 |
| 347 | 3.1797 | 0.00000 |
| 348 | 3.1920 | 0.00000 |
| 349 | 3.3005 | 0.00000 |
| 350 | 3.3226 | 0.00000 |
| 351 | 3.3520 | 0.00000 |
| 352 | 3.3673 | 0.00000 |

|     |        |         |
|-----|--------|---------|
| 353 | 3.3895 | 0.00000 |
| 354 | 3.4326 | 0.00000 |
| 355 | 3.4763 | 0.00000 |
| 356 | 3.4851 | 0.00000 |
| 357 | 3.4857 | 0.00000 |
| 358 | 3.4986 | 0.00000 |
| 359 | 3.6342 | 0.00000 |
| 360 | 3.6730 | 0.00000 |
| 361 | 3.6859 | 0.00000 |
| 362 | 3.7322 | 0.00000 |
| 363 | 3.7515 | 0.00000 |
| 364 | 3.7589 | 0.00000 |
| 365 | 3.7721 | 0.00000 |
| 366 | 3.7936 | 0.00000 |
| 367 | 3.8121 | 0.00000 |
| 368 | 3.8341 | 0.00000 |
| 369 | 3.8382 | 0.00000 |
| 370 | 3.8519 | 0.00000 |
| 371 | 3.8767 | 0.00000 |
| 372 | 3.8838 | 0.00000 |
| 373 | 3.9101 | 0.00000 |
| 374 | 3.9241 | 0.00000 |

|     |        |         |
|-----|--------|---------|
| 375 | 3.9340 | 0.00000 |
| 376 | 3.9576 | 0.00000 |
| 377 | 3.9726 | 0.00000 |
| 378 | 3.9838 | 0.00000 |
| 379 | 4.0163 | 0.00000 |
| 380 | 4.0697 | 0.00000 |
| 381 | 4.1646 | 0.00000 |
| 382 | 4.2466 | 0.00000 |
| 383 | 4.2576 | 0.00000 |
| 384 | 4.2582 | 0.00000 |
| 385 | 4.2851 | 0.00000 |
| 386 | 4.3130 | 0.00000 |
| 387 | 4.3277 | 0.00000 |
| 388 | 4.3410 | 0.00000 |
| 389 | 4.3712 | 0.00000 |
| 390 | 4.3810 | 0.00000 |
| 391 | 4.4174 | 0.00000 |
| 392 | 4.4444 | 0.00000 |
| 393 | 4.4686 | 0.00000 |
| 394 | 4.4803 | 0.00000 |
| 395 | 4.4865 | 0.00000 |
| 396 | 4.4963 | 0.00000 |

|     |        |         |
|-----|--------|---------|
| 397 | 4.5173 | 0.00000 |
| 398 | 4.5504 | 0.00000 |
| 399 | 4.5907 | 0.00000 |
| 400 | 4.6078 | 0.00000 |
| 401 | 4.6273 | 0.00000 |
| 402 | 4.6429 | 0.00000 |
| 403 | 4.6568 | 0.00000 |
| 404 | 4.6796 | 0.00000 |
| 405 | 4.7040 | 0.00000 |
| 406 | 4.7317 | 0.00000 |
| 407 | 4.7465 | 0.00000 |
| 408 | 4.7670 | 0.00000 |
| 409 | 4.7832 | 0.00000 |
| 410 | 4.7835 | 0.00000 |
| 411 | 4.7972 | 0.00000 |
| 412 | 4.8284 | 0.00000 |
| 413 | 4.8632 | 0.00000 |
| 414 | 4.8722 | 0.00000 |
| 415 | 4.8977 | 0.00000 |
| 416 | 4.9312 | 0.00000 |
| 417 | 4.9835 | 0.00000 |
| 418 | 5.0045 | 0.00000 |

|     |        |         |
|-----|--------|---------|
| 419 | 5.0105 | 0.00000 |
| 420 | 5.0350 | 0.00000 |
| 421 | 5.0392 | 0.00000 |
| 422 | 5.0651 | 0.00000 |
| 423 | 5.0818 | 0.00000 |
| 424 | 5.1143 | 0.00000 |
| 425 | 5.1173 | 0.00000 |
| 426 | 5.1365 | 0.00000 |
| 427 | 5.1409 | 0.00000 |
| 428 | 5.1539 | 0.00000 |
| 429 | 5.1753 | 0.00000 |
| 430 | 5.1850 | 0.00000 |
| 431 | 5.1878 | 0.00000 |
| 432 | 5.2154 | 0.00000 |
| 433 | 5.2353 | 0.00000 |
| 434 | 5.2408 | 0.00000 |
| 435 | 5.2558 | 0.00000 |
| 436 | 5.2895 | 0.00000 |
| 437 | 5.2956 | 0.00000 |
| 438 | 5.3088 | 0.00000 |
| 439 | 5.3317 | 0.00000 |
| 440 | 5.3493 | 0.00000 |

|     |        |         |
|-----|--------|---------|
| 441 | 5.3670 | 0.00000 |
| 442 | 5.3736 | 0.00000 |
| 443 | 5.3928 | 0.00000 |
| 444 | 5.4210 | 0.00000 |
| 445 | 5.4533 | 0.00000 |
| 446 | 5.4640 | 0.00000 |
| 447 | 5.4816 | 0.00000 |
| 448 | 5.4943 | 0.00000 |
| 449 | 5.5187 | 0.00000 |
| 450 | 5.5499 | 0.00000 |
| 451 | 5.5691 | 0.00000 |
| 452 | 5.5752 | 0.00000 |
| 453 | 5.5954 | 0.00000 |
| 454 | 5.6155 | 0.00000 |
| 455 | 5.6577 | 0.00000 |
| 456 | 5.6813 | 0.00000 |
| 457 | 5.7094 | 0.00000 |
| 458 | 5.7230 | 0.00000 |
| 459 | 5.7436 | 0.00000 |
| 460 | 5.7575 | 0.00000 |
| 461 | 5.7815 | 0.00000 |
| 462 | 5.7895 | 0.00000 |

|     |        |         |
|-----|--------|---------|
| 463 | 5.7951 | 0.00000 |
| 464 | 5.8009 | 0.00000 |
| 465 | 5.8073 | 0.00000 |
| 466 | 5.8232 | 0.00000 |
| 467 | 5.8426 | 0.00000 |
| 468 | 5.8538 | 0.00000 |
| 469 | 5.8732 | 0.00000 |
| 470 | 5.8814 | 0.00000 |
| 471 | 5.8859 | 0.00000 |
| 472 | 5.9092 | 0.00000 |
| 473 | 5.9144 | 0.00000 |
| 474 | 5.9412 | 0.00000 |
| 475 | 5.9507 | 0.00000 |
| 476 | 5.9695 | 0.00000 |
| 477 | 5.9746 | 0.00000 |
| 478 | 5.9986 | 0.00000 |
| 479 | 6.0082 | 0.00000 |
| 480 | 6.0630 | 0.00000 |

spin component 2

k-point 1 : 0.0000 0.0000 0.0000

| band No. | band energies | occupation |
|----------|---------------|------------|
| 1        | -27.0065      | 1.00000    |
| 2        | -21.5671      | 1.00000    |
| 3        | -21.4697      | 1.00000    |
| 4        | -21.0975      | 1.00000    |
| 5        | -21.0675      | 1.00000    |
| 6        | -21.0118      | 1.00000    |
| 7        | -20.9770      | 1.00000    |
| 8        | -20.9746      | 1.00000    |
| 9        | -20.8803      | 1.00000    |
| 10       | -20.5546      | 1.00000    |
| 11       | -20.4997      | 1.00000    |
| 12       | -20.4003      | 1.00000    |
| 13       | -20.3882      | 1.00000    |
| 14       | -20.1221      | 1.00000    |
| 15       | -19.9525      | 1.00000    |
| 16       | -19.7004      | 1.00000    |
| 17       | -19.6260      | 1.00000    |
| 18       | -19.5973      | 1.00000    |
| 19       | -19.5773      | 1.00000    |
| 20       | -19.5271      | 1.00000    |
| 21       | -19.5249      | 1.00000    |

|    |          |         |
|----|----------|---------|
| 22 | -19.4758 | 1.00000 |
| 23 | -19.4614 | 1.00000 |
| 24 | -19.1094 | 1.00000 |
| 25 | -19.0727 | 1.00000 |
| 26 | -18.9684 | 1.00000 |
| 27 | -18.9551 | 1.00000 |
| 28 | -18.8957 | 1.00000 |
| 29 | -18.7037 | 1.00000 |
| 30 | -18.5015 | 1.00000 |
| 31 | -18.3519 | 1.00000 |
| 32 | -18.2470 | 1.00000 |
| 33 | -18.2268 | 1.00000 |
| 34 | -18.1781 | 1.00000 |
| 35 | -18.1758 | 1.00000 |
| 36 | -18.0595 | 1.00000 |
| 37 | -18.0562 | 1.00000 |
| 38 | -17.5582 | 1.00000 |
| 39 | -17.2969 | 1.00000 |
| 40 | -17.2868 | 1.00000 |
| 41 | -17.2732 | 1.00000 |
| 42 | -17.2074 | 1.00000 |
| 43 | -17.2064 | 1.00000 |

|    |          |         |
|----|----------|---------|
| 44 | -17.1737 | 1.00000 |
| 45 | -17.0186 | 1.00000 |
| 46 | -16.9412 | 1.00000 |
| 47 | -16.9220 | 1.00000 |
| 48 | -16.8704 | 1.00000 |
| 49 | -16.8693 | 1.00000 |
| 50 | -16.8290 | 1.00000 |
| 51 | -16.8226 | 1.00000 |
| 52 | -16.8176 | 1.00000 |
| 53 | -16.8152 | 1.00000 |
| 54 | -16.7309 | 1.00000 |
| 55 | -16.7249 | 1.00000 |
| 56 | -16.1747 | 1.00000 |
| 57 | -15.7287 | 1.00000 |
| 58 | -15.6574 | 1.00000 |
| 59 | -15.6432 | 1.00000 |
| 60 | -15.6208 | 1.00000 |
| 61 | -15.5663 | 1.00000 |
| 62 | -15.5276 | 1.00000 |
| 63 | -15.5249 | 1.00000 |
| 64 | -15.1710 | 1.00000 |
| 65 | -14.8073 | 1.00000 |

|    |          |         |
|----|----------|---------|
| 66 | -14.6061 | 1.00000 |
| 67 | -14.5603 | 1.00000 |
| 68 | -14.5001 | 1.00000 |
| 69 | -14.4983 | 1.00000 |
| 70 | -14.4643 | 1.00000 |
| 71 | -14.4378 | 1.00000 |
| 72 | -14.3303 | 1.00000 |
| 73 | -14.2977 | 1.00000 |
| 74 | -14.2678 | 1.00000 |
| 75 | -14.2636 | 1.00000 |
| 76 | -14.1642 | 1.00000 |
| 77 | -14.1608 | 1.00000 |
| 78 | -13.8889 | 1.00000 |
| 79 | -13.7573 | 1.00000 |
| 80 | -13.5907 | 1.00000 |
| 81 | -13.5376 | 1.00000 |
| 82 | -13.5181 | 1.00000 |
| 83 | -13.4940 | 1.00000 |
| 84 | -13.4440 | 1.00000 |
| 85 | -13.3434 | 1.00000 |
| 86 | -13.3408 | 1.00000 |
| 87 | -13.1872 | 1.00000 |

|     |          |         |
|-----|----------|---------|
| 88  | -12.7799 | 1.00000 |
| 89  | -12.7498 | 1.00000 |
| 90  | -12.7183 | 1.00000 |
| 91  | -12.6773 | 1.00000 |
| 92  | -12.6704 | 1.00000 |
| 93  | -12.6215 | 1.00000 |
| 94  | -12.4484 | 1.00000 |
| 95  | -12.4312 | 1.00000 |
| 96  | -12.3782 | 1.00000 |
| 97  | -12.3230 | 1.00000 |
| 98  | -12.2082 | 1.00000 |
| 99  | -12.1980 | 1.00000 |
| 100 | -12.1633 | 1.00000 |
| 101 | -11.9461 | 1.00000 |
| 102 | -11.6819 | 1.00000 |
| 103 | -11.6122 | 1.00000 |
| 104 | -11.5917 | 1.00000 |
| 105 | -11.5726 | 1.00000 |
| 106 | -11.1048 | 1.00000 |
| 107 | -11.0733 | 1.00000 |
| 108 | -10.8895 | 1.00000 |
| 109 | -10.8770 | 1.00000 |

|     |          |         |
|-----|----------|---------|
| 110 | -10.8292 | 1.00000 |
| 111 | -10.7046 | 1.00000 |
| 112 | -10.6793 | 1.00000 |
| 113 | -10.6593 | 1.00000 |
| 114 | -10.6415 | 1.00000 |
| 115 | -10.5812 | 1.00000 |
| 116 | -10.5738 | 1.00000 |
| 117 | -10.5687 | 1.00000 |
| 118 | -10.5647 | 1.00000 |
| 119 | -10.5154 | 1.00000 |
| 120 | -10.5145 | 1.00000 |
| 121 | -10.5012 | 1.00000 |
| 122 | -10.4966 | 1.00000 |
| 123 | -10.3775 | 1.00000 |
| 124 | -10.2936 | 1.00000 |
| 125 | -10.2557 | 1.00000 |
| 126 | -10.1840 | 1.00000 |
| 127 | -10.1828 | 1.00000 |
| 128 | -10.0694 | 1.00000 |
| 129 | -10.0342 | 1.00000 |
| 130 | -9.8890  | 1.00000 |
| 131 | -9.8635  | 1.00000 |

|     |         |         |
|-----|---------|---------|
| 132 | -9.7867 | 1.00000 |
| 133 | -9.7769 | 1.00000 |
| 134 | -9.7556 | 1.00000 |
| 135 | -9.6910 | 1.00000 |
| 136 | -9.4483 | 1.00000 |
| 137 | -9.4219 | 1.00000 |
| 138 | -9.3837 | 1.00000 |
| 139 | -9.3790 | 1.00000 |
| 140 | -9.3724 | 1.00000 |
| 141 | -9.3593 | 1.00000 |
| 142 | -9.3079 | 1.00000 |
| 143 | -9.3008 | 1.00000 |
| 144 | -9.2993 | 1.00000 |
| 145 | -9.2845 | 1.00000 |
| 146 | -9.2478 | 1.00000 |
| 147 | -9.0907 | 1.00000 |
| 148 | -9.0006 | 1.00000 |
| 149 | -8.9822 | 1.00000 |
| 150 | -8.9437 | 1.00000 |
| 151 | -8.9424 | 1.00000 |
| 152 | -8.7904 | 1.00000 |
| 153 | -8.7374 | 1.00000 |

|     |         |         |
|-----|---------|---------|
| 154 | -8.7318 | 1.00000 |
| 155 | -8.7122 | 1.00000 |
| 156 | -8.7053 | 1.00000 |
| 157 | -8.6698 | 1.00000 |
| 158 | -8.6635 | 1.00000 |
| 159 | -8.6560 | 1.00000 |
| 160 | -8.6528 | 1.00000 |
| 161 | -8.5770 | 1.00000 |
| 162 | -8.5708 | 1.00000 |
| 163 | -8.5659 | 1.00000 |
| 164 | -8.5487 | 1.00000 |
| 165 | -8.4871 | 1.00000 |
| 166 | -8.4564 | 1.00000 |
| 167 | -8.4340 | 1.00000 |
| 168 | -8.3423 | 1.00000 |
| 169 | -8.2939 | 1.00000 |
| 170 | -8.2729 | 1.00000 |
| 171 | -8.2329 | 1.00000 |
| 172 | -8.2291 | 1.00000 |
| 173 | -8.2271 | 1.00000 |
| 174 | -8.1411 | 1.00000 |
| 175 | -8.1335 | 1.00000 |

|     |         |         |
|-----|---------|---------|
| 176 | -8.0741 | 1.00000 |
| 177 | -8.0419 | 1.00000 |
| 178 | -8.0129 | 1.00000 |
| 179 | -8.0069 | 1.00000 |
| 180 | -7.9682 | 1.00000 |
| 181 | -7.9591 | 1.00000 |
| 182 | -7.9199 | 1.00000 |
| 183 | -7.8906 | 1.00000 |
| 184 | -7.8709 | 1.00000 |
| 185 | -7.8631 | 1.00000 |
| 186 | -7.7915 | 1.00000 |
| 187 | -7.7876 | 1.00000 |
| 188 | -7.7376 | 1.00000 |
| 189 | -7.6786 | 1.00000 |
| 190 | -7.6358 | 1.00000 |
| 191 | -7.5971 | 1.00000 |
| 192 | -7.5765 | 1.00000 |
| 193 | -7.5543 | 1.00000 |
| 194 | -7.5395 | 1.00000 |
| 195 | -7.4721 | 1.00000 |
| 196 | -7.4720 | 1.00000 |
| 197 | -7.4269 | 1.00000 |

|     |         |         |
|-----|---------|---------|
| 198 | -7.3230 | 1.00000 |
| 199 | -7.2356 | 1.00000 |
| 200 | -7.1520 | 1.00000 |
| 201 | -7.0551 | 1.00000 |
| 202 | -7.0360 | 1.00000 |
| 203 | -7.0154 | 1.00000 |
| 204 | -6.9850 | 1.00000 |
| 205 | -6.9771 | 1.00000 |
| 206 | -6.9719 | 1.00000 |
| 207 | -6.9406 | 1.00000 |
| 208 | -6.8624 | 1.00000 |
| 209 | -6.8159 | 1.00000 |
| 210 | -6.7950 | 1.00000 |
| 211 | -6.7875 | 1.00000 |
| 212 | -6.7248 | 1.00000 |
| 213 | -6.6765 | 1.00000 |
| 214 | -6.4672 | 1.00000 |
| 215 | -6.3946 | 1.00000 |
| 216 | -6.3825 | 1.00000 |
| 217 | -6.3779 | 1.00000 |
| 218 | -6.3626 | 1.00000 |
| 219 | -6.3381 | 1.00000 |

|     |         |         |
|-----|---------|---------|
| 220 | -6.3030 | 1.00000 |
| 221 | -6.2753 | 1.00000 |
| 222 | -6.2291 | 1.00000 |
| 223 | -6.2277 | 1.00000 |
| 224 | -6.2221 | 1.00000 |
| 225 | -6.0465 | 1.00000 |
| 226 | -6.0086 | 1.00000 |
| 227 | -5.7558 | 1.00000 |
| 228 | -5.7111 | 1.00000 |
| 229 | -5.6918 | 1.00000 |
| 230 | -5.6353 | 1.00000 |
| 231 | -5.6223 | 1.00000 |
| 232 | -5.5436 | 1.00000 |
| 233 | -5.5229 | 1.00000 |
| 234 | -5.4408 | 1.00000 |
| 235 | -5.4114 | 1.00000 |
| 236 | -5.1425 | 1.00000 |
| 237 | -5.0597 | 1.00000 |
| 238 | -5.0257 | 1.00000 |
| 239 | -5.0219 | 1.00000 |
| 240 | -4.9590 | 1.00000 |
| 241 | -4.8770 | 1.00000 |

|     |         |         |
|-----|---------|---------|
| 242 | -4.8539 | 1.00000 |
| 243 | -4.8023 | 1.00000 |
| 244 | -4.7773 | 1.00000 |
| 245 | -4.6499 | 1.00000 |
| 246 | -4.5783 | 1.00000 |
| 247 | -4.5752 | 1.00000 |
| 248 | -4.4752 | 1.00000 |
| 249 | -4.4208 | 1.00000 |
| 250 | -4.3944 | 1.00000 |
| 251 | -4.2962 | 1.00000 |
| 252 | -4.2264 | 1.00000 |
| 253 | -4.1749 | 1.00000 |
| 254 | -3.5318 | 1.00000 |
| 255 | -3.3087 | 1.00000 |
| 256 | -3.1408 | 1.00000 |
| 257 | -2.9439 | 1.00000 |
| 258 | -2.7988 | 1.00000 |
| 259 | -2.7396 | 1.00000 |
| 260 | -2.0600 | 0.00000 |
| 261 | -1.9142 | 0.00000 |
| 262 | -1.7220 | 0.00000 |
| 263 | -1.6784 | 0.00000 |

|     |         |         |
|-----|---------|---------|
| 264 | -1.2865 | 0.00000 |
| 265 | -1.2750 | 0.00000 |
| 266 | -1.1545 | 0.00000 |
| 267 | -0.7223 | 0.00000 |
| 268 | -0.5835 | 0.00000 |
| 269 | -0.5087 | 0.00000 |
| 270 | -0.2803 | 0.00000 |
| 271 | -0.2773 | 0.00000 |
| 272 | -0.2594 | 0.00000 |
| 273 | -0.1558 | 0.00000 |
| 274 | -0.0569 | 0.00000 |
| 275 | -0.0477 | 0.00000 |
| 276 | 0.0140  | 0.00000 |
| 277 | 0.0405  | 0.00000 |
| 278 | 0.0799  | 0.00000 |
| 279 | 0.2085  | 0.00000 |
| 280 | 0.2559  | 0.00000 |
| 281 | 0.2801  | 0.00000 |
| 282 | 0.4350  | 0.00000 |
| 283 | 0.4524  | 0.00000 |
| 284 | 0.4832  | 0.00000 |
| 285 | 0.6030  | 0.00000 |

|     |        |         |
|-----|--------|---------|
| 286 | 0.6960 | 0.00000 |
| 287 | 0.8219 | 0.00000 |
| 288 | 0.8804 | 0.00000 |
| 289 | 1.0543 | 0.00000 |
| 290 | 1.1038 | 0.00000 |
| 291 | 1.1427 | 0.00000 |
| 292 | 1.1775 | 0.00000 |
| 293 | 1.2321 | 0.00000 |
| 294 | 1.2506 | 0.00000 |
| 295 | 1.3086 | 0.00000 |
| 296 | 1.3199 | 0.00000 |
| 297 | 1.3600 | 0.00000 |
| 298 | 1.4306 | 0.00000 |
| 299 | 1.4785 | 0.00000 |
| 300 | 1.5012 | 0.00000 |
| 301 | 1.5773 | 0.00000 |
| 302 | 1.6032 | 0.00000 |
| 303 | 1.6537 | 0.00000 |
| 304 | 1.6864 | 0.00000 |
| 305 | 1.7582 | 0.00000 |
| 306 | 1.7736 | 0.00000 |
| 307 | 1.8774 | 0.00000 |

|     |        |         |
|-----|--------|---------|
| 308 | 1.9004 | 0.00000 |
| 309 | 1.9083 | 0.00000 |
| 310 | 1.9214 | 0.00000 |
| 311 | 2.1398 | 0.00000 |
| 312 | 2.1979 | 0.00000 |
| 313 | 2.2202 | 0.00000 |
| 314 | 2.2541 | 0.00000 |
| 315 | 2.2895 | 0.00000 |
| 316 | 2.2964 | 0.00000 |
| 317 | 2.3368 | 0.00000 |
| 318 | 2.3614 | 0.00000 |
| 319 | 2.3831 | 0.00000 |
| 320 | 2.4079 | 0.00000 |
| 321 | 2.4286 | 0.00000 |
| 322 | 2.4353 | 0.00000 |
| 323 | 2.4512 | 0.00000 |
| 324 | 2.4585 | 0.00000 |
| 325 | 2.4673 | 0.00000 |
| 326 | 2.5265 | 0.00000 |
| 327 | 2.5431 | 0.00000 |
| 328 | 2.7061 | 0.00000 |
| 329 | 2.7347 | 0.00000 |

|     |        |         |
|-----|--------|---------|
| 330 | 2.7535 | 0.00000 |
| 331 | 2.7594 | 0.00000 |
| 332 | 2.7729 | 0.00000 |
| 333 | 2.8291 | 0.00000 |
| 334 | 2.8473 | 0.00000 |
| 335 | 2.8718 | 0.00000 |
| 336 | 2.9025 | 0.00000 |
| 337 | 2.9329 | 0.00000 |
| 338 | 2.9559 | 0.00000 |
| 339 | 2.9833 | 0.00000 |
| 340 | 3.0067 | 0.00000 |
| 341 | 3.0380 | 0.00000 |
| 342 | 3.0512 | 0.00000 |
| 343 | 3.0717 | 0.00000 |
| 344 | 3.0924 | 0.00000 |
| 345 | 3.1523 | 0.00000 |
| 346 | 3.1716 | 0.00000 |
| 347 | 3.1885 | 0.00000 |
| 348 | 3.2001 | 0.00000 |
| 349 | 3.3062 | 0.00000 |
| 350 | 3.3274 | 0.00000 |
| 351 | 3.3603 | 0.00000 |

|     |        |         |
|-----|--------|---------|
| 352 | 3.3708 | 0.00000 |
| 353 | 3.3927 | 0.00000 |
| 354 | 3.4381 | 0.00000 |
| 355 | 3.4816 | 0.00000 |
| 356 | 3.4916 | 0.00000 |
| 357 | 3.4944 | 0.00000 |
| 358 | 3.5051 | 0.00000 |
| 359 | 3.6392 | 0.00000 |
| 360 | 3.6769 | 0.00000 |
| 361 | 3.6982 | 0.00000 |
| 362 | 3.7380 | 0.00000 |
| 363 | 3.7552 | 0.00000 |
| 364 | 3.7608 | 0.00000 |
| 365 | 3.7770 | 0.00000 |
| 366 | 3.7984 | 0.00000 |
| 367 | 3.8149 | 0.00000 |
| 368 | 3.8413 | 0.00000 |
| 369 | 3.8475 | 0.00000 |
| 370 | 3.8661 | 0.00000 |
| 371 | 3.8805 | 0.00000 |
| 372 | 3.8932 | 0.00000 |
| 373 | 3.9209 | 0.00000 |

|     |        |         |
|-----|--------|---------|
| 374 | 3.9359 | 0.00000 |
| 375 | 3.9487 | 0.00000 |
| 376 | 3.9594 | 0.00000 |
| 377 | 3.9828 | 0.00000 |
| 378 | 3.9865 | 0.00000 |
| 379 | 4.0222 | 0.00000 |
| 380 | 4.0791 | 0.00000 |
| 381 | 4.1710 | 0.00000 |
| 382 | 4.2595 | 0.00000 |
| 383 | 4.2621 | 0.00000 |
| 384 | 4.2688 | 0.00000 |
| 385 | 4.2928 | 0.00000 |
| 386 | 4.3211 | 0.00000 |
| 387 | 4.3343 | 0.00000 |
| 388 | 4.3502 | 0.00000 |
| 389 | 4.3811 | 0.00000 |
| 390 | 4.3858 | 0.00000 |
| 391 | 4.4232 | 0.00000 |
| 392 | 4.4485 | 0.00000 |
| 393 | 4.4737 | 0.00000 |
| 394 | 4.4834 | 0.00000 |
| 395 | 4.4929 | 0.00000 |

|     |        |         |
|-----|--------|---------|
| 396 | 4.4991 | 0.00000 |
| 397 | 4.5207 | 0.00000 |
| 398 | 4.5549 | 0.00000 |
| 399 | 4.5938 | 0.00000 |
| 400 | 4.6105 | 0.00000 |
| 401 | 4.6290 | 0.00000 |
| 402 | 4.6464 | 0.00000 |
| 403 | 4.6598 | 0.00000 |
| 404 | 4.6855 | 0.00000 |
| 405 | 4.7088 | 0.00000 |
| 406 | 4.7375 | 0.00000 |
| 407 | 4.7515 | 0.00000 |
| 408 | 4.7704 | 0.00000 |
| 409 | 4.7867 | 0.00000 |
| 410 | 4.7890 | 0.00000 |
| 411 | 4.8029 | 0.00000 |
| 412 | 4.8332 | 0.00000 |
| 413 | 4.8684 | 0.00000 |
| 414 | 4.8852 | 0.00000 |
| 415 | 4.9029 | 0.00000 |
| 416 | 4.9418 | 0.00000 |
| 417 | 4.9932 | 0.00000 |

|     |        |         |
|-----|--------|---------|
| 418 | 5.0099 | 0.00000 |
| 419 | 5.0128 | 0.00000 |
| 420 | 5.0383 | 0.00000 |
| 421 | 5.0444 | 0.00000 |
| 422 | 5.0694 | 0.00000 |
| 423 | 5.0860 | 0.00000 |
| 424 | 5.1177 | 0.00000 |
| 425 | 5.1214 | 0.00000 |
| 426 | 5.1406 | 0.00000 |
| 427 | 5.1442 | 0.00000 |
| 428 | 5.1704 | 0.00000 |
| 429 | 5.1799 | 0.00000 |
| 430 | 5.1887 | 0.00000 |
| 431 | 5.1927 | 0.00000 |
| 432 | 5.2204 | 0.00000 |
| 433 | 5.2378 | 0.00000 |
| 434 | 5.2440 | 0.00000 |
| 435 | 5.2615 | 0.00000 |
| 436 | 5.2980 | 0.00000 |
| 437 | 5.3029 | 0.00000 |
| 438 | 5.3119 | 0.00000 |
| 439 | 5.3361 | 0.00000 |

|     |        |         |
|-----|--------|---------|
| 440 | 5.3532 | 0.00000 |
| 441 | 5.3708 | 0.00000 |
| 442 | 5.3812 | 0.00000 |
| 443 | 5.3955 | 0.00000 |
| 444 | 5.4292 | 0.00000 |
| 445 | 5.4595 | 0.00000 |
| 446 | 5.4706 | 0.00000 |
| 447 | 5.4871 | 0.00000 |
| 448 | 5.4988 | 0.00000 |
| 449 | 5.5257 | 0.00000 |
| 450 | 5.5680 | 0.00000 |
| 451 | 5.5747 | 0.00000 |
| 452 | 5.5947 | 0.00000 |
| 453 | 5.6076 | 0.00000 |
| 454 | 5.6252 | 0.00000 |
| 455 | 5.6700 | 0.00000 |
| 456 | 5.6920 | 0.00000 |
| 457 | 5.7188 | 0.00000 |
| 458 | 5.7274 | 0.00000 |
| 459 | 5.7479 | 0.00000 |
| 460 | 5.7626 | 0.00000 |
| 461 | 5.7896 | 0.00000 |

|     |        |         |
|-----|--------|---------|
| 462 | 5.7926 | 0.00000 |
| 463 | 5.7981 | 0.00000 |
| 464 | 5.8041 | 0.00000 |
| 465 | 5.8203 | 0.00000 |
| 466 | 5.8254 | 0.00000 |
| 467 | 5.8545 | 0.00000 |
| 468 | 5.8610 | 0.00000 |
| 469 | 5.8825 | 0.00000 |
| 470 | 5.8867 | 0.00000 |
| 471 | 5.8912 | 0.00000 |
| 472 | 5.9082 | 0.00000 |
| 473 | 5.9214 | 0.00000 |
| 474 | 5.9494 | 0.00000 |
| 475 | 5.9540 | 0.00000 |
| 476 | 5.9704 | 0.00000 |
| 477 | 5.9767 | 0.00000 |
| 478 | 5.9926 | 0.00000 |
| 479 | 6.0137 | 0.00000 |
| 480 | 6.0463 | 0.00000 |

---

soft charge-density along one line, spin component

1

0 1 2 3 4 5 6 7

8 9

total charge-density along one line

soft charge-density along one line, spin component

2

0 1 2 3 4 5 6 7

8 9

total charge-density along one line

pseudopotential strength for first ion, spin component:

1

-2.331 -4.014 -0.002 0.000 0.000

-4.014 -6.828 -0.006 0.000 -0.000

-0.002 -0.006 -0.336 -0.000 0.000

0.000 0.000 -0.000 -0.341 -0.000

0.000 -0.000 0.000 -0.000 -0.341

pseudopotential strength for first ion, spin component:

2

-2.331 -4.014 -0.002 0.000 0.000

-4.014 -6.828 -0.006 0.000 -0.000

-0.002 -0.006 -0.336 -0.000 0.000

0.000 0.000 -0.000 -0.341 -0.000

0.000 -0.000 0.000 -0.000 -0.341

total augmentation occupancy for first ion, spin component: 1

3.579 -0.646 0.444 -0.034 -0.000

-0.646 0.130 -0.082 0.006 0.000

0.444 -0.082 0.056 -0.003 -0.000

-0.034 0.006 -0.003 0.011 0.000

-0.000 0.000 -0.000 0.000 0.007

total augmentation occupancy for first ion, spin component: 2

-0.000 0.000 -0.000 0.000 0.000

0.000 -0.000 0.000 -0.000 -0.000

-0.000 0.000 -0.000 -0.000 -0.000

0.000 -0.000 -0.000 -0.000 -0.000

0.000 -0.000 -0.000 -0.000 -0.000

----- aborting loop because EDIFF is reached -----

total charge

| # of ion | s     | p     | d     | tot   |
|----------|-------|-------|-------|-------|
| 1        | 0.646 | 0.043 | 0.000 | 0.690 |
| 2        | 0.646 | 0.043 | 0.000 | 0.690 |
| 3        | 0.646 | 0.043 | 0.000 | 0.690 |
| 4        | 0.646 | 0.043 | 0.000 | 0.690 |
| 5        | 0.646 | 0.043 | 0.000 | 0.690 |
| 6        | 0.646 | 0.043 | 0.000 | 0.690 |
| 7        | 0.646 | 0.043 | 0.000 | 0.690 |
| 8        | 0.646 | 0.043 | 0.000 | 0.690 |
| 9        | 0.646 | 0.043 | 0.000 | 0.690 |
| 10       | 0.646 | 0.043 | 0.000 | 0.690 |
| 11       | 0.646 | 0.043 | 0.000 | 0.690 |
| 12       | 0.646 | 0.043 | 0.000 | 0.690 |
| 13       | 0.646 | 0.043 | 0.000 | 0.689 |
| 14       | 0.646 | 0.043 | 0.000 | 0.689 |
| 15       | 0.648 | 0.045 | 0.000 | 0.693 |
| 16       | 0.646 | 0.043 | 0.000 | 0.689 |
| 17       | 0.646 | 0.043 | 0.000 | 0.689 |
| 18       | 0.646 | 0.043 | 0.000 | 0.689 |

|    |       |       |       |       |
|----|-------|-------|-------|-------|
| 19 | 0.646 | 0.043 | 0.000 | 0.689 |
| 20 | 0.646 | 0.043 | 0.000 | 0.689 |
| 21 | 0.646 | 0.043 | 0.000 | 0.689 |
| 22 | 0.646 | 0.044 | 0.000 | 0.690 |
| 23 | 0.542 | 0.015 | 0.000 | 0.557 |
| 24 | 0.541 | 0.015 | 0.000 | 0.556 |
| 25 | 0.870 | 1.763 | 0.000 | 2.633 |
| 26 | 0.867 | 1.785 | 0.000 | 2.653 |
| 27 | 0.867 | 1.786 | 0.000 | 2.653 |
| 28 | 0.870 | 1.762 | 0.000 | 2.632 |
| 29 | 0.865 | 1.783 | 0.000 | 2.648 |
| 30 | 0.870 | 1.763 | 0.000 | 2.633 |
| 31 | 0.867 | 1.786 | 0.000 | 2.653 |
| 32 | 0.867 | 1.786 | 0.000 | 2.653 |
| 33 | 0.870 | 1.762 | 0.000 | 2.632 |
| 34 | 0.865 | 1.783 | 0.000 | 2.648 |
| 35 | 0.870 | 1.763 | 0.000 | 2.633 |
| 36 | 0.868 | 1.787 | 0.000 | 2.654 |
| 37 | 0.867 | 1.786 | 0.000 | 2.653 |
| 38 | 0.870 | 1.763 | 0.000 | 2.633 |
| 39 | 0.865 | 1.784 | 0.000 | 2.649 |
| 40 | 0.870 | 1.763 | 0.000 | 2.633 |

|    |       |       |       |       |
|----|-------|-------|-------|-------|
| 41 | 0.868 | 1.787 | 0.000 | 2.655 |
| 42 | 0.867 | 1.786 | 0.000 | 2.653 |
| 43 | 0.871 | 1.764 | 0.000 | 2.634 |
| 44 | 0.865 | 1.783 | 0.000 | 2.648 |
| 45 | 0.870 | 1.763 | 0.000 | 2.633 |
| 46 | 0.867 | 1.786 | 0.000 | 2.653 |
| 47 | 0.867 | 1.786 | 0.000 | 2.653 |
| 48 | 0.871 | 1.763 | 0.000 | 2.634 |
| 49 | 0.865 | 1.783 | 0.000 | 2.648 |
| 50 | 0.870 | 1.763 | 0.000 | 2.633 |
| 51 | 0.867 | 1.786 | 0.000 | 2.653 |
| 52 | 0.867 | 1.786 | 0.000 | 2.653 |
| 53 | 0.870 | 1.762 | 0.000 | 2.632 |
| 54 | 0.865 | 1.784 | 0.000 | 2.648 |
| 55 | 0.865 | 1.784 | 0.000 | 2.649 |
| 56 | 0.865 | 1.786 | 0.000 | 2.651 |
| 57 | 0.866 | 1.787 | 0.000 | 2.653 |
| 58 | 0.866 | 1.790 | 0.000 | 2.656 |
| 59 | 0.865 | 1.786 | 0.000 | 2.651 |
| 60 | 0.866 | 1.786 | 0.000 | 2.651 |
| 61 | 0.866 | 1.788 | 0.000 | 2.654 |
| 62 | 0.867 | 1.791 | 0.000 | 2.658 |

|    |       |       |       |       |
|----|-------|-------|-------|-------|
| 63 | 0.865 | 1.784 | 0.000 | 2.649 |
| 64 | 0.865 | 1.786 | 0.000 | 2.651 |
| 65 | 0.866 | 1.787 | 0.000 | 2.652 |
| 66 | 0.865 | 1.788 | 0.000 | 2.653 |
| 67 | 0.865 | 1.786 | 0.000 | 2.651 |
| 68 | 0.866 | 1.785 | 0.000 | 2.651 |
| 69 | 0.865 | 1.787 | 0.000 | 2.652 |
| 70 | 0.866 | 1.787 | 0.000 | 2.653 |
| 71 | 0.865 | 1.784 | 0.000 | 2.649 |
| 72 | 0.865 | 1.786 | 0.000 | 2.651 |
| 73 | 0.866 | 1.786 | 0.000 | 2.652 |
| 74 | 0.864 | 1.785 | 0.000 | 2.649 |
| 75 | 0.865 | 1.786 | 0.000 | 2.651 |
| 76 | 0.866 | 1.786 | 0.000 | 2.651 |
| 77 | 0.865 | 1.786 | 0.000 | 2.651 |
| 78 | 0.865 | 1.784 | 0.000 | 2.649 |
| 79 | 0.865 | 1.784 | 0.000 | 2.649 |
| 80 | 0.865 | 1.786 | 0.000 | 2.651 |
| 81 | 0.865 | 1.785 | 0.000 | 2.650 |
| 82 | 0.863 | 1.782 | 0.000 | 2.645 |
| 83 | 0.865 | 1.786 | 0.000 | 2.651 |
| 84 | 0.866 | 1.786 | 0.000 | 2.651 |

|     |       |       |       |       |
|-----|-------|-------|-------|-------|
| 85  | 0.865 | 1.784 | 0.000 | 2.648 |
| 86  | 0.862 | 1.774 | 0.000 | 2.636 |
| 87  | 0.865 | 1.784 | 0.000 | 2.649 |
| 88  | 0.865 | 1.787 | 0.000 | 2.652 |
| 89  | 0.865 | 1.785 | 0.000 | 2.650 |
| 90  | 0.865 | 1.788 | 0.000 | 2.653 |
| 91  | 0.865 | 1.786 | 0.000 | 2.651 |
| 92  | 0.866 | 1.786 | 0.000 | 2.651 |
| 93  | 0.864 | 1.783 | 0.000 | 2.647 |
| 94  | 0.866 | 1.785 | 0.000 | 2.651 |
| 95  | 0.865 | 1.784 | 0.000 | 2.649 |
| 96  | 0.865 | 1.786 | 0.000 | 2.651 |
| 97  | 0.866 | 1.787 | 0.000 | 2.653 |
| 98  | 0.866 | 1.789 | 0.000 | 2.655 |
| 99  | 0.865 | 1.786 | 0.000 | 2.651 |
| 100 | 0.866 | 1.786 | 0.000 | 2.651 |
| 101 | 0.865 | 1.787 | 0.000 | 2.652 |
| 102 | 0.867 | 1.790 | 0.000 | 2.657 |
| 103 | 0.865 | 1.786 | 0.000 | 2.651 |
| 104 | 0.867 | 1.785 | 0.000 | 2.653 |
| 105 | 0.866 | 1.786 | 0.000 | 2.652 |
| 106 | 0.870 | 1.778 | 0.000 | 2.648 |

|     |       |       |       |       |
|-----|-------|-------|-------|-------|
| 107 | 0.869 | 1.765 | 0.000 | 2.635 |
| 108 | 0.865 | 1.783 | 0.000 | 2.648 |
| 109 | 0.869 | 1.789 | 0.000 | 2.658 |
| 110 | 0.865 | 1.786 | 0.000 | 2.651 |
| 111 | 0.867 | 1.785 | 0.000 | 2.653 |
| 112 | 0.867 | 1.789 | 0.000 | 2.655 |
| 113 | 0.871 | 1.782 | 0.000 | 2.653 |
| 114 | 0.869 | 1.765 | 0.000 | 2.634 |
| 115 | 0.865 | 1.783 | 0.000 | 2.648 |
| 116 | 0.870 | 1.791 | 0.000 | 2.661 |
| 117 | 0.865 | 1.786 | 0.000 | 2.651 |
| 118 | 0.867 | 1.786 | 0.000 | 2.653 |
| 119 | 0.865 | 1.782 | 0.000 | 2.647 |
| 120 | 0.857 | 1.707 | 0.000 | 2.564 |
| 121 | 0.869 | 1.765 | 0.000 | 2.634 |
| 122 | 0.865 | 1.783 | 0.000 | 2.648 |
| 123 | 0.866 | 1.778 | 0.000 | 2.644 |
| 124 | 0.866 | 1.786 | 0.000 | 2.652 |
| 125 | 0.867 | 1.785 | 0.000 | 2.653 |
| 126 | 0.862 | 1.776 | 0.000 | 2.638 |
| 127 | 0.849 | 1.831 | 0.000 | 2.680 |
| 128 | 0.870 | 1.767 | 0.000 | 2.637 |

|     |       |       |       |       |
|-----|-------|-------|-------|-------|
| 129 | 0.865 | 1.783 | 0.000 | 2.648 |
| 130 | 0.860 | 1.757 | 0.000 | 2.617 |
| 131 | 0.866 | 1.786 | 0.000 | 2.652 |
| 132 | 0.867 | 1.784 | 0.000 | 2.652 |
| 133 | 0.864 | 1.787 | 0.000 | 2.651 |
| 134 | 0.869 | 1.790 | 0.000 | 2.659 |
| 135 | 0.869 | 1.767 | 0.000 | 2.636 |
| 136 | 0.865 | 1.783 | 0.000 | 2.648 |
| 137 | 0.866 | 1.772 | 0.000 | 2.638 |
| 138 | 0.866 | 1.786 | 0.000 | 2.652 |
| 139 | 0.867 | 1.785 | 0.000 | 2.652 |
| 140 | 0.866 | 1.788 | 0.000 | 2.654 |
| 141 | 0.870 | 1.779 | 0.000 | 2.649 |
| 142 | 0.869 | 1.766 | 0.000 | 2.635 |
| 143 | 0.865 | 1.783 | 0.000 | 2.648 |
| 144 | 0.869 | 1.790 | 0.000 | 2.659 |
| 145 | 0.943 | 1.720 | 0.000 | 2.663 |
| 146 | 1.240 | 1.546 | 0.074 | 2.860 |
| 147 | 1.634 | 3.528 | 0.000 | 5.162 |

-----  
tot           123.063 221.552   0.074 344.690

magnetization (x)

| # of ion | s | p | d | tot |
|----------|---|---|---|-----|
|----------|---|---|---|-----|

-----

|    |        |        |       |        |
|----|--------|--------|-------|--------|
| 1  | 0.000  | -0.000 | 0.000 | 0.000  |
| 2  | -0.000 | 0.000  | 0.000 | -0.000 |
| 3  | 0.000  | -0.000 | 0.000 | 0.000  |
| 4  | -0.000 | 0.000  | 0.000 | -0.000 |
| 5  | 0.000  | -0.000 | 0.000 | 0.000  |
| 6  | -0.000 | 0.000  | 0.000 | -0.000 |
| 7  | 0.000  | -0.000 | 0.000 | 0.000  |
| 8  | -0.000 | 0.000  | 0.000 | -0.000 |
| 9  | 0.000  | -0.000 | 0.000 | 0.000  |
| 10 | -0.000 | 0.000  | 0.000 | -0.000 |
| 11 | 0.000  | -0.000 | 0.000 | 0.000  |
| 12 | -0.000 | 0.000  | 0.000 | -0.000 |
| 13 | 0.000  | -0.000 | 0.000 | 0.000  |
| 14 | -0.004 | 0.002  | 0.000 | -0.002 |
| 15 | 0.000  | -0.000 | 0.000 | 0.000  |
| 16 | -0.004 | 0.002  | 0.000 | -0.002 |

|    |        |        |       |        |
|----|--------|--------|-------|--------|
| 17 | -0.004 | 0.002  | 0.000 | -0.002 |
| 18 | 0.000  | -0.000 | 0.000 | 0.000  |
| 19 | -0.003 | 0.001  | 0.000 | -0.002 |
| 20 | 0.000  | -0.000 | 0.000 | 0.000  |
| 21 | -0.003 | 0.002  | 0.000 | -0.002 |
| 22 | -0.003 | 0.002  | 0.000 | -0.002 |
| 23 | -0.000 | 0.000  | 0.000 | -0.000 |
| 24 | -0.000 | 0.000  | 0.000 | -0.000 |
| 25 | -0.000 | -0.007 | 0.000 | -0.008 |
| 26 | -0.000 | -0.002 | 0.000 | -0.002 |
| 27 | 0.000  | 0.003  | 0.000 | 0.003  |
| 28 | 0.000  | 0.005  | 0.000 | 0.005  |
| 29 | 0.000  | 0.003  | 0.000 | 0.003  |
| 30 | -0.000 | -0.007 | 0.000 | -0.008 |
| 31 | -0.000 | -0.002 | 0.000 | -0.002 |
| 32 | 0.000  | 0.003  | 0.000 | 0.003  |
| 33 | 0.000  | 0.005  | 0.000 | 0.005  |
| 34 | 0.000  | 0.002  | 0.000 | 0.002  |
| 35 | -0.000 | -0.007 | 0.000 | -0.008 |
| 36 | -0.000 | -0.002 | 0.000 | -0.002 |
| 37 | 0.000  | 0.003  | 0.000 | 0.003  |
| 38 | 0.000  | 0.006  | 0.000 | 0.007  |

|    |        |        |       |        |
|----|--------|--------|-------|--------|
| 39 | 0.000  | 0.002  | 0.000 | 0.002  |
| 40 | -0.000 | -0.007 | 0.000 | -0.008 |
| 41 | -0.000 | -0.002 | 0.000 | -0.002 |
| 42 | 0.000  | 0.002  | 0.000 | 0.003  |
| 43 | 0.000  | 0.005  | 0.000 | 0.006  |
| 44 | 0.000  | 0.004  | 0.000 | 0.004  |
| 45 | -0.000 | -0.007 | 0.000 | -0.008 |
| 46 | -0.000 | -0.002 | 0.000 | -0.002 |
| 47 | 0.000  | 0.003  | 0.000 | 0.003  |
| 48 | 0.000  | 0.005  | 0.000 | 0.006  |
| 49 | 0.000  | 0.001  | 0.000 | 0.001  |
| 50 | -0.000 | -0.007 | 0.000 | -0.008 |
| 51 | -0.000 | -0.002 | 0.000 | -0.002 |
| 52 | 0.000  | 0.002  | 0.000 | 0.003  |
| 53 | 0.000  | 0.006  | 0.000 | 0.007  |
| 54 | 0.000  | 0.002  | 0.000 | 0.002  |
| 55 | -0.000 | -0.005 | 0.000 | -0.006 |
| 56 | -0.000 | -0.007 | 0.000 | -0.007 |
| 57 | -0.000 | -0.001 | 0.000 | -0.001 |
| 58 | -0.000 | -0.001 | 0.000 | -0.001 |
| 59 | 0.000  | 0.006  | 0.000 | 0.007  |
| 60 | 0.000  | 0.003  | 0.000 | 0.003  |

|    |        |        |       |        |
|----|--------|--------|-------|--------|
| 61 | 0.000  | 0.001  | 0.000 | 0.001  |
| 62 | 0.000  | 0.003  | 0.000 | 0.003  |
| 63 | -0.000 | -0.005 | 0.000 | -0.006 |
| 64 | -0.000 | -0.007 | 0.000 | -0.007 |
| 65 | -0.000 | -0.001 | 0.000 | -0.001 |
| 66 | -0.000 | -0.001 | 0.000 | -0.001 |
| 67 | 0.000  | 0.006  | 0.000 | 0.006  |
| 68 | 0.000  | 0.003  | 0.000 | 0.003  |
| 69 | 0.000  | 0.001  | 0.000 | 0.001  |
| 70 | 0.000  | 0.002  | 0.000 | 0.002  |
| 71 | -0.000 | -0.005 | 0.000 | -0.006 |
| 72 | -0.000 | -0.007 | 0.000 | -0.007 |
| 73 | -0.000 | -0.001 | 0.000 | -0.001 |
| 74 | -0.000 | -0.002 | 0.000 | -0.002 |
| 75 | 0.000  | 0.006  | 0.000 | 0.007  |
| 76 | 0.000  | 0.003  | 0.000 | 0.004  |
| 77 | 0.000  | 0.003  | 0.000 | 0.003  |
| 78 | 0.000  | 0.001  | 0.000 | 0.001  |
| 79 | -0.000 | -0.005 | 0.000 | -0.006 |
| 80 | -0.000 | -0.007 | 0.000 | -0.007 |
| 81 | -0.000 | -0.001 | 0.000 | -0.002 |
| 82 | -0.000 | -0.002 | 0.000 | -0.002 |

|     |        |        |       |        |
|-----|--------|--------|-------|--------|
| 83  | 0.001  | 0.007  | 0.000 | 0.008  |
| 84  | 0.000  | 0.003  | 0.000 | 0.003  |
| 85  | 0.000  | 0.002  | 0.000 | 0.002  |
| 86  | 0.000  | 0.005  | 0.000 | 0.006  |
| 87  | -0.000 | -0.005 | 0.000 | -0.005 |
| 88  | -0.000 | -0.007 | 0.000 | -0.007 |
| 89  | -0.000 | -0.001 | 0.000 | -0.002 |
| 90  | -0.000 | -0.002 | 0.000 | -0.002 |
| 91  | 0.001  | 0.008  | 0.000 | 0.008  |
| 92  | 0.000  | 0.003  | 0.000 | 0.003  |
| 93  | 0.000  | 0.002  | 0.000 | 0.003  |
| 94  | 0.000  | 0.001  | 0.000 | 0.001  |
| 95  | -0.000 | -0.005 | 0.000 | -0.006 |
| 96  | -0.000 | -0.007 | 0.000 | -0.007 |
| 97  | -0.000 | -0.001 | 0.000 | -0.001 |
| 98  | -0.000 | -0.001 | 0.000 | -0.001 |
| 99  | 0.001  | 0.007  | 0.000 | 0.007  |
| 100 | 0.000  | 0.003  | 0.000 | 0.004  |
| 101 | 0.000  | 0.003  | 0.000 | 0.003  |
| 102 | 0.000  | 0.002  | 0.000 | 0.002  |
| 103 | -0.001 | -0.010 | 0.000 | -0.011 |
| 104 | -0.003 | -0.028 | 0.000 | -0.031 |

|     |        |        |       |        |
|-----|--------|--------|-------|--------|
| 105 | -0.000 | -0.001 | 0.000 | -0.002 |
| 106 | -0.000 | -0.004 | 0.000 | -0.005 |
| 107 | 0.007  | 0.116  | 0.000 | 0.122  |
| 108 | 0.001  | 0.010  | 0.000 | 0.011  |
| 109 | 0.000  | 0.001  | 0.000 | 0.001  |
| 110 | -0.001 | -0.010 | 0.000 | -0.011 |
| 111 | -0.003 | -0.028 | 0.000 | -0.031 |
| 112 | -0.000 | -0.001 | 0.000 | -0.002 |
| 113 | -0.000 | -0.003 | 0.000 | -0.004 |
| 114 | 0.007  | 0.120  | 0.000 | 0.127  |
| 115 | 0.001  | 0.010  | 0.000 | 0.011  |
| 116 | 0.000  | 0.001  | 0.000 | 0.002  |
| 117 | -0.001 | -0.010 | 0.000 | -0.011 |
| 118 | -0.003 | -0.026 | 0.000 | -0.029 |
| 119 | -0.000 | -0.002 | 0.000 | -0.002 |
| 120 | -0.000 | -0.002 | 0.000 | -0.002 |
| 121 | 0.007  | 0.115  | 0.000 | 0.122  |
| 122 | 0.001  | 0.010  | 0.000 | 0.010  |
| 123 | 0.000  | 0.003  | 0.000 | 0.003  |
| 124 | -0.001 | -0.010 | 0.000 | -0.011 |
| 125 | -0.003 | -0.024 | 0.000 | -0.027 |
| 126 | -0.000 | -0.002 | 0.000 | -0.002 |

|     |        |        |        |        |
|-----|--------|--------|--------|--------|
| 127 | -0.000 | 0.001  | 0.000  | 0.001  |
| 128 | 0.006  | 0.105  | 0.000  | 0.111  |
| 129 | 0.001  | 0.009  | 0.000  | 0.010  |
| 130 | 0.000  | 0.004  | 0.000  | 0.004  |
| 131 | -0.001 | -0.009 | 0.000  | -0.010 |
| 132 | -0.003 | -0.024 | 0.000  | -0.027 |
| 133 | -0.000 | -0.002 | 0.000  | -0.002 |
| 134 | -0.000 | -0.002 | 0.000  | -0.002 |
| 135 | 0.006  | 0.097  | 0.000  | 0.102  |
| 136 | 0.001  | 0.009  | 0.000  | 0.010  |
| 137 | 0.000  | 0.004  | 0.000  | 0.005  |
| 138 | -0.001 | -0.010 | 0.000  | -0.011 |
| 139 | -0.003 | -0.026 | 0.000  | -0.029 |
| 140 | -0.000 | -0.002 | 0.000  | -0.002 |
| 141 | -0.000 | -0.003 | 0.000  | -0.004 |
| 142 | 0.006  | 0.105  | 0.000  | 0.111  |
| 143 | 0.001  | 0.010  | 0.000  | 0.010  |
| 144 | 0.000  | 0.002  | 0.000  | 0.003  |
| 145 | 0.000  | 0.005  | 0.000  | 0.006  |
| 146 | -0.000 | 0.000  | -0.000 | 0.000  |
| 147 | 0.000  | 0.004  | 0.000  | 0.004  |

-----

tot            0.001    0.513   -0.000    0.514

CHARGE:    cpu time    0.5247: real time    0.5264

FORLOC:    cpu time    0.0199: real time    0.0199

FORNL :    cpu time    2.0412: real time    2.0486

STRESS:    cpu time    6.1199: real time    6.1414

FORCOR:    cpu time    0.1415: real time    0.1446

FORHAR:    cpu time    0.0329: real time    0.0330

MIXING:    cpu time    0.0099: real time    0.0100

OFIELD:    cpu time    0.0001: real time    0.0001

---

DFTD3 V3.0 Rev 1

Edisp (eV)   -6.61778

E6    (eV):    -3.9313

E8    (eV):    -2.6865

% E8            : 40.60

FORVDW:    cpu time    1.8307: real time    1.8578

FORCE on cell =-STRESS in cart. coord.    units (eV):

| Direction | XX | YY | ZZ | XY | YZ | ZX |
|-----------|----|----|----|----|----|----|
|-----------|----|----|----|----|----|----|

```

-----
Alpha Z   233.50077   233.50077   233.50077
Ewald    107578.82113 23477.72195-39726.67839   6.61667  3455.37498   126.96661
Hartree  106097.66684 25032.87846-23793.79132  -7.84487  2947.15814   92.80971
E(xc)   -1914.25008 -1916.59708 -1979.90705   0.12110   1.82367   0.12318
Local   *****-53958.90031 57014.32649   4.28808 -6360.43687  -216.56288
n-local  -472.65521  -482.49881  -439.56650  -0.62040  -0.71886  -0.27918
augment  -38.28098   -38.59421   -34.30844   0.02120  -0.98379   0.00707
Kinetic  7635.27983   7638.80264   8714.01536  -2.83799  -41.61945  -3.01282
Fock      0.00000     0.00000     0.00000     0.00000   0.00000   0.00000
vdW      -2.64087   -1.49209   -6.59252   0.00135  -0.07442   0.01253

```

```

-----
Total    -17.73381   -15.17868   -19.00161  -0.25487   0.52340   0.06422
in kB    -4.89020   -4.18560   -5.23980  -0.07028   0.14433   0.01771
external pressure =      -4.77 kB  Pullay stress =      0.00 kB

```

VOLUME and BASIS-vectors are now :

```

-----
energy-cutoff :      400.00

```

```

volume of cell :      5810.14

```

direct lattice vectors

reciprocal lattice vectors

|              |              |              |             |             |             |
|--------------|--------------|--------------|-------------|-------------|-------------|
| 14.780600000 | 0.000000000  | 0.000000000  | 0.067656252 | 0.000000000 | 0.000000000 |
| 0.000000000  | 21.333900000 | 0.000000000  | 0.000000000 | 0.046873755 | 0.000000000 |
| 0.000000000  | 0.000000000  | 18.425700000 | 0.000000000 | 0.000000000 | 0.054272022 |

length of vectors

|              |              |              |             |             |             |
|--------------|--------------|--------------|-------------|-------------|-------------|
| 14.780600000 | 21.333900000 | 18.425700000 | 0.067656252 | 0.046873755 | 0.054272022 |
|--------------|--------------|--------------|-------------|-------------|-------------|

FORCES acting on ions

electron-ion (+dipol)

ewald-force

non-local-force

convergence-correction

-----

|           |           |           |           |           |           |           |           |   |
|-----------|-----------|-----------|-----------|-----------|-----------|-----------|-----------|---|
| 0.512E-02 | 0.154E+03 | 0.361E+02 | -.361E-02 | -.160E+03 | -.357E+02 | -.180E-02 | 0.566E+01 | - |
| .438E+00  | -.417E-06 | 0.163E-07 | 0.707E-06 |           |           |           |           |   |
| -.178E-01 | 0.155E+03 | -.340E+02 | 0.154E-01 | -.160E+03 | 0.335E+02 | 0.115E-02 | 0.565E+01 |   |
| 0.541E+00 | -.183E-05 | -.438E-06 | 0.124E-06 |           |           |           |           |   |
| 0.185E+00 | 0.154E+03 | 0.360E+02 | -.185E+00 | -.160E+03 | -.356E+02 | 0.708E-05 | 0.565E+01 | - |
| .443E+00  | -.290E-06 | 0.858E-06 | -.545E-06 |           |           |           |           |   |
| 0.113E+00 | 0.155E+03 | -.341E+02 | -.996E-01 | -.160E+03 | 0.336E+02 | -.175E-01 | 0.565E+01 |   |
| 0.535E+00 | -.128E-05 | 0.159E-05 | -.807E-06 |           |           |           |           |   |
| 0.171E+00 | 0.154E+03 | 0.362E+02 | -.173E+00 | -.160E+03 | -.357E+02 | 0.116E-02 | 0.566E+01 | - |

.440E+00 0.146E-06 0.102E-05 -.740E-06  
0.126E+00 0.154E+03 -.340E+02 -.108E+00 -.160E+03 0.334E+02 -.211E-01 0.565E+01  
0.541E+00 0.692E-06 0.200E-05 -.960E-06  
-.198E-01 0.154E+03 0.363E+02 0.186E-01 -.160E+03 -.359E+02 0.159E-02 0.566E+01 -  
.431E+00 0.346E-06 0.386E-06 0.279E-06  
-.137E-01 0.154E+03 -.338E+02 0.205E-01 -.160E+03 0.332E+02 -.720E-02 0.565E+01  
0.555E+00 0.169E-05 0.635E-06 -.241E-06  
-.182E+00 0.154E+03 0.363E+02 0.183E+00 -.160E+03 -.359E+02 0.257E-03 0.566E+01 -  
.429E+00 0.258E-06 -.323E-06 0.144E-05  
-.129E+00 0.155E+03 -.337E+02 0.116E+00 -.160E+03 0.331E+02 0.109E-01 0.565E+01  
0.561E+00 0.113E-05 -.116E-05 0.589E-06  
-.174E+00 0.154E+03 0.362E+02 0.176E+00 -.160E+03 -.358E+02 -.177E-02 0.566E+01 -  
.432E+00 -.420E-07 -.541E-06 0.166E-05  
-.115E+00 0.155E+03 -.338E+02 0.959E-01 -.160E+03 0.332E+02 0.192E-01 0.565E+01  
0.555E+00 -.413E-06 -.180E-05 0.801E-06  
0.229E+01 -.150E+03 -.387E+02 -.228E+01 0.156E+03 0.386E+02 -.104E-01 -.566E+01  
0.767E-01 0.758E-06 -.367E-06 -.633E-06  
-.413E+00 -.151E+03 0.388E+02 0.414E+00 0.157E+03 -.386E+02 -.129E-02 -.567E+01 -  
.269E+00 0.810E-06 -.613E-06 -.321E-07  
0.136E+02 -.146E+03 -.413E+02 -.139E+02 0.151E+03 0.413E+02 0.257E+00 -.567E+01 -  
.348E-01 -.596E-06 -.626E-06 -.843E-06  
0.163E+01 -.151E+03 0.402E+02 -.163E+01 0.156E+03 -.400E+02 -.101E-02 -.567E+01 -

.229E+00 0.457E-06 -.180E-06 0.645E-06  
0.353E+01 -.149E+03 0.443E+02 -.352E+01 0.155E+03 -.441E+02 -.202E-02 -.567E+01 -  
.180E+00 -.663E-07 -.118E-06 0.492E-06  
-.148E+02 -.146E+03 -.330E+02 0.149E+02 0.151E+03 0.330E+02 -.963E-01 -.566E+01  
0.492E-01 -.771E-06 -.223E-05 -.611E-06  
-.298E+01 -.149E+03 0.432E+02 0.297E+01 0.155E+03 -.430E+02 0.115E-01 -.567E+01 -  
.241E+00 -.669E-06 -.797E-06 -.513E-06  
-.378E+01 -.150E+03 -.385E+02 0.378E+01 0.156E+03 0.385E+02 -.629E-02 -.566E+01  
0.240E-01 0.141E-05 -.149E-05 -.999E-06  
-.208E+01 -.151E+03 0.395E+02 0.208E+01 0.156E+03 -.392E+02 0.151E-02 -.566E+01 -  
.282E+00 -.260E-07 -.114E-05 -.518E-06  
0.443E-03 -.148E+03 0.486E+02 0.715E-02 0.154E+03 -.484E+02 -.551E-02 -.570E+01 -  
.158E+00 -.474E-06 -.339E-06 -.464E-07  
0.196E+02 -.103E+03 0.222E+02 -.212E+02 0.103E+03 -.246E+02 0.154E+01 0.138E+00  
0.238E+01 -.921E-06 -.847E-06 -.897E-06  
-.192E+02 -.103E+03 0.154E+02 0.216E+02 0.103E+03 -.169E+02 -.241E+01 -.119E+00  
0.152E+01 -.633E-06 -.160E-05 -.126E-05  
0.729E-01 0.461E+03 0.202E+03 -.762E-01 -.462E+03 -.201E+03 0.382E-02 0.102E+01 -  
.219E+00 -.174E-06 0.757E-06 0.163E-05  
0.214E+00 0.353E+03 -.234E+03 -.215E+00 -.353E+03 0.234E+03 0.260E-02 0.443E+00 -  
.370E-01 -.258E-05 -.177E-06 -.201E-05  
-.240E-01 0.351E+03 0.240E+03 0.226E-01 -.351E+03 -.241E+03 0.314E-02 0.408E+00

0.564E-01 0.296E-06 0.564E-06 0.252E-05  
-.171E+00 0.462E+03 -.195E+03 0.177E+00 -.463E+03 0.195E+03 -.665E-02 0.105E+01  
0.233E+00 -.410E-05 -.236E-05 -.628E-06  
-.587E-01 0.210E+03 -.272E+03 0.628E-01 -.210E+03 0.272E+03 -.451E-02 0.935E-01  
0.560E-01 -.115E-05 0.794E-06 -.160E-05  
0.564E+00 0.461E+03 0.202E+03 -.566E+00 -.462E+03 -.201E+03 0.201E-02 0.102E+01 -  
.214E+00 -.183E-06 0.274E-05 -.202E-05  
0.106E+01 0.352E+03 -.234E+03 -.108E+01 -.353E+03 0.234E+03 0.160E-01 0.448E+00 -  
.424E-01 -.401E-06 0.297E-05 -.287E-05  
0.415E+00 0.351E+03 0.240E+03 -.417E+00 -.351E+03 -.240E+03 0.301E-02 0.408E+00  
0.491E-01 0.306E-06 0.172E-05 -.617E-06  
0.581E+00 0.462E+03 -.195E+03 -.586E+00 -.463E+03 0.195E+03 0.479E-02 0.105E+01  
0.235E+00 -.286E-05 0.355E-05 -.299E-05  
0.691E+00 0.210E+03 -.272E+03 -.697E+00 -.210E+03 0.272E+03 0.608E-02 0.912E-01  
0.616E-01 -.839E-08 0.184E-05 -.176E-05  
0.426E+00 0.461E+03 0.202E+03 -.429E+00 -.462E+03 -.202E+03 0.385E-02 0.102E+01 -  
.214E+00 0.248E-07 0.305E-05 -.254E-05  
0.938E+00 0.352E+03 -.233E+03 -.954E+00 -.352E+03 0.233E+03 0.151E-01 0.441E+00 -  
.377E-01 0.225E-05 0.162E-05 -.204E-05  
0.479E+00 0.351E+03 0.241E+03 -.481E+00 -.351E+03 -.241E+03 0.249E-02 0.406E+00  
0.512E-01 0.663E-07 0.241E-05 -.259E-05  
0.705E+00 0.462E+03 -.194E+03 -.716E+00 -.463E+03 0.194E+03 0.786E-02 0.106E+01

0.242E+00 0.175E-05 0.475E-05 -.319E-05  
0.723E+00 0.210E+03 -.271E+03 -.732E+00 -.210E+03 0.271E+03 0.656E-02 0.910E-01  
0.593E-01 0.998E-06 0.118E-05 -.126E-05  
-.183E+00 0.461E+03 0.202E+03 0.180E+00 -.462E+03 -.202E+03 0.450E-02 0.102E+01 -  
.218E+00 0.817E-07 0.158E-05 0.540E-06  
-.297E+00 0.352E+03 -.233E+03 0.301E+00 -.352E+03 0.233E+03 -.198E-02 0.440E+00 -  
.299E-01 0.198E-05 -.251E-05 -.519E-06  
0.395E-01 0.351E+03 0.241E+03 -.385E-01 -.351E+03 -.241E+03 0.224E-02 0.409E+00  
0.557E-01 -.363E-06 0.202E-05 -.131E-05  
0.476E-01 0.462E+03 -.194E+03 -.538E-01 -.463E+03 0.194E+03 0.401E-02 0.106E+01  
0.232E+00 0.380E-05 0.317E-06 -.127E-05  
-.517E-01 0.210E+03 -.271E+03 0.496E-01 -.210E+03 0.271E+03 -.234E-03 0.933E-01  
0.324E-01 0.592E-06 -.470E-06 -.701E-06  
-.553E+00 0.461E+03 0.202E+03 0.551E+00 -.462E+03 -.202E+03 0.775E-03 0.102E+01 -  
.220E+00 0.125E-06 -.167E-06 0.401E-05  
-.119E+01 0.352E+03 -.233E+03 0.120E+01 -.353E+03 0.233E+03 -.163E-01 0.447E+00 -  
.330E-01 0.437E-06 -.442E-05 0.383E-06  
-.354E+00 0.351E+03 0.241E+03 0.351E+00 -.351E+03 -.241E+03 0.207E-02 0.413E+00  
0.623E-01 -.444E-06 0.957E-06 0.174E-05  
-.414E+00 0.462E+03 -.194E+03 0.428E+00 -.463E+03 0.194E+03 -.115E-01 0.106E+01  
0.230E+00 0.236E-05 -.514E-05 0.805E-06  
-.563E+00 0.210E+03 -.271E+03 0.567E+00 -.210E+03 0.271E+03 -.946E-02 0.914E-01

0.525E-01 0.298E-06 -.155E-05 -.661E-06  
-.475E+00 0.461E+03 0.202E+03 0.474E+00 -.462E+03 -.202E+03 0.306E-02 0.102E+01 -  
.220E+00 0.143E-06 -.710E-06 0.450E-05  
-.804E+00 0.353E+03 -.234E+03 0.818E+00 -.353E+03 0.234E+03 -.150E-01 0.447E+00 -  
.393E-01 -.177E-05 -.369E-05 -.300E-06  
-.375E+00 0.351E+03 0.241E+03 0.369E+00 -.351E+03 -.241E+03 0.962E-03 0.411E+00  
0.626E-01 0.119E-06 0.306E-06 0.368E-05  
-.594E+00 0.462E+03 -.194E+03 0.608E+00 -.463E+03 0.194E+03 -.170E-01 0.105E+01  
0.234E+00 -.927E-06 -.657E-05 0.129E-05  
-.586E+00 0.210E+03 -.272E+03 0.597E+00 -.210E+03 0.272E+03 -.102E-01 0.991E-01  
0.566E-01 -.771E-06 -.110E-05 -.996E-06  
-.780E-02 0.206E+03 0.279E+03 0.112E-01 -.206E+03 -.279E+03 -.361E-02 0.686E-01 -  
.412E-01 0.629E-06 0.336E-06 0.146E-05  
0.671E+00 0.303E+02 0.296E+03 -.666E+00 -.302E+02 -.296E+03 -.469E-02 -.410E-01  
0.750E-02 0.630E-06 -.182E-07 0.736E-06  
-.842E+00 0.144E+03 -.282E+03 0.844E+00 -.144E+03 0.282E+03 -.321E-02 0.137E+00  
0.287E-01 -.844E-06 0.580E-06 -.119E-05  
0.543E+00 -.215E+02 -.285E+03 -.544E+00 0.214E+02 0.285E+03 -.781E-03 0.387E-01  
0.186E-01 -.396E-06 0.644E-06 -.103E-05  
0.502E+00 -.294E+02 0.293E+03 -.499E+00 0.294E+02 -.293E+03 -.554E-02 0.254E-01 -  
.304E-01 0.296E-06 0.280E-06 0.104E-05  
0.526E+00 0.139E+03 0.289E+03 -.527E+00 -.139E+03 -.289E+03 0.178E-02 0.103E+00 -

.248E-01 0.799E-06 0.146E-06 0.450E-06  
-.126E+01 0.364E+02 -.287E+03 0.126E+01 -.364E+02 0.287E+03 -.671E-04 -.763E-02  
0.139E-01 -.342E-06 0.774E-06 -.807E-06  
0.168E+01 -.130E+03 -.271E+03 -.170E+01 0.130E+03 0.271E+03 0.106E-01 -.879E-01  
0.372E-01 0.310E-06 0.165E-05 -.119E-05  
0.399E+00 0.207E+03 0.280E+03 -.397E+00 -.207E+03 -.280E+03 0.701E-03 0.695E-01 -  
.371E-01 0.747E-06 0.359E-06 -.607E-06  
0.923E+00 0.312E+02 0.296E+03 -.926E+00 -.311E+02 -.296E+03 0.224E-02 -.410E-01  
0.122E-01 0.586E-06 -.331E-06 -.234E-06  
0.133E+01 0.144E+03 -.282E+03 -.134E+01 -.144E+03 0.282E+03 0.498E-02 0.126E+00  
0.279E-01 -.213E-06 0.137E-05 -.145E-05  
0.342E+01 -.199E+02 -.285E+03 -.344E+01 0.199E+02 0.285E+03 0.136E-01 0.412E-01  
0.137E-01 0.381E-07 0.146E-05 -.149E-05  
0.139E+01 -.287E+02 0.294E+03 -.139E+01 0.287E+02 -.294E+03 -.350E-02 0.252E-01 -  
.307E-01 0.467E-06 -.194E-07 0.647E-06  
0.680E+00 0.139E+03 0.290E+03 -.680E+00 -.139E+03 -.290E+03 0.611E-03 0.103E+00 -  
.295E-01 0.561E-06 0.768E-08 -.118E-05  
0.161E+01 0.367E+02 -.287E+03 -.159E+01 -.367E+02 0.287E+03 -.128E-01 -.206E-01  
0.128E-01 -.211E-06 0.119E-05 -.125E-05  
0.613E+01 -.125E+03 -.271E+03 -.615E+01 0.125E+03 0.271E+03 0.220E-01 -.894E-01  
0.148E-01 -.144E-06 0.148E-05 -.194E-05  
0.368E+00 0.207E+03 0.280E+03 -.373E+00 -.207E+03 -.280E+03 0.102E-03 0.684E-01 -

.365E-01 0.953E-07 0.531E-06 -.196E-05  
-.375E-01 0.319E+02 0.296E+03 0.288E-01 -.318E+02 -.296E+03 0.106E-01 -.362E-01  
0.139E-01 -.216E-06 -.245E-06 -.588E-06  
0.210E+01 0.144E+03 -.281E+03 -.211E+01 -.144E+03 0.281E+03 0.122E-01 0.120E+00  
0.241E-01 0.561E-06 0.109E-05 -.131E-05  
0.303E+01 -.171E+02 -.283E+03 -.305E+01 0.171E+02 0.283E+03 0.246E-01 0.878E-01  
0.606E-01 0.423E-06 0.209E-05 -.126E-05  
0.106E+01 -.272E+02 0.294E+03 -.106E+01 0.272E+02 -.294E+03 0.287E-02 0.243E-01 -  
.376E-01 0.164E-06 -.797E-07 0.337E-08  
0.966E-01 0.140E+03 0.290E+03 -.982E-01 -.140E+03 -.290E+03 0.129E-02 0.107E+00 -  
.232E-01 -.283E-06 0.659E-07 -.151E-05  
0.277E+01 0.387E+02 -.286E+03 -.277E+01 -.387E+02 0.286E+03 0.140E-02 -.107E-01  
0.294E-01 0.236E-06 0.145E-05 -.123E-05  
0.595E+01 -.115E+03 -.267E+03 -.611E+01 0.115E+03 0.267E+03 0.155E+00 0.282E-02  
0.129E+00 -.384E-06 0.166E-05 -.207E-05  
-.243E+00 0.207E+03 0.280E+03 0.241E+00 -.207E+03 -.280E+03 0.439E-02 0.716E-01 -  
.387E-01 -.645E-06 0.583E-06 -.118E-05  
-.115E+01 0.314E+02 0.294E+03 0.114E+01 -.314E+02 -.294E+03 0.920E-02 -.311E-01  
0.542E-02 -.719E-06 0.864E-07 0.589E-08  
0.591E+00 0.144E+03 -.281E+03 -.608E+00 -.144E+03 0.281E+03 0.178E-01 0.126E+00  
0.438E-01 0.303E-06 0.907E-06 -.823E-06  
-.954E+00 -.159E+02 -.286E+03 0.945E+00 0.158E+02 0.285E+03 0.603E-02 0.907E-01

0.802E-01    -.374E-06 -.238E-06 -.125E-05  
              -.646E+00 -.265E+02 0.293E+03    0.642E+00 0.265E+02 -.293E+03    0.491E-02 0.234E-01 -  
.271E-01    -.374E-06 0.151E-06 0.730E-08  
              -.537E+00 0.139E+03 0.289E+03    0.532E+00 -.139E+03 -.289E+03    0.656E-02 0.114E+00 -  
.214E-01    -.918E-06 0.234E-06 -.246E-06  
              0.771E+00 0.408E+02 -.287E+03    -.783E+00 -.408E+02 0.287E+03    0.506E-02 0.215E-02 -  
.190E-01    0.129E-06 0.616E-06 -.902E-06  
              -.490E+00 -.113E+03 -.276E+03    0.457E+00 0.113E+03 0.276E+03    0.334E-01 0.601E-01 -  
.268E+00    -.209E-05 0.494E-07 -.220E-05  
              -.574E+00 0.206E+03 0.279E+03    0.572E+00 -.206E+03 -.279E+03    0.117E-02 0.720E-01 -  
.455E-01    -.827E-06 0.470E-06 0.832E-06  
              -.787E+00 0.304E+02 0.294E+03    0.790E+00 -.304E+02 -.294E+03    -.753E-02 -.309E-01 -  
.139E-02    -.360E-06 0.400E-06 0.854E-06  
              -.123E+01 0.144E+03 -.281E+03    0.125E+01 -.145E+03 0.281E+03    -.157E-01 0.122E+00  
0.504E-01    0.650E-06 -.130E-06 -.712E-06  
              -.366E+01 -.174E+02 -.283E+03    0.369E+01 0.173E+02 0.283E+03    -.307E-01 0.116E+00  
0.590E-01    -.947E-08 0.964E-06 -.108E-05  
              -.130E+01 -.277E+02 0.291E+03    0.130E+01 0.277E+02 -.291E+03    -.130E-02 0.340E-01 -  
.219E-01    -.536E-06 0.353E-06 0.410E-06  
              -.350E+00 0.139E+03 0.289E+03    0.349E+00 -.139E+03 -.289E+03    0.250E-04 0.112E+00 -  
.146E-01    -.481E-06 0.451E-06 0.136E-05  
              -.837E+00 0.400E+02 -.287E+03    0.829E+00 -.400E+02 0.287E+03    0.124E-01 -.758E-02 -

.182E-01    -.392E-06 -.629E-07 -.908E-06  
          -.787E+01 -.119E+03 -.267E+03    0.806E+01 0.119E+03 0.267E+03    -.188E+00 0.148E-02  
0.349E-01    0.179E-05 -.101E-05 -.252E-05  
          -.410E+00 0.206E+03 0.279E+03    0.411E+00 -.206E+03 -.279E+03    -.280E-02 0.715E-01 -  
.464E-01    -.138E-07 0.380E-06 0.222E-05  
          -.631E-01 0.300E+02 0.294E+03    0.729E-01 -.299E+02 -.294E+03    -.948E-02 -.347E-01  
0.120E-02    0.128E-06 0.351E-06 0.123E-05  
          -.206E+01 0.145E+03 -.282E+03    0.208E+01 -.145E+03 0.282E+03    -.189E-01 0.132E+00  
0.256E-01    -.373E-06 -.863E-06 -.894E-06  
          -.256E+01 -.209E+02 -.285E+03    0.258E+01 0.208E+02 0.285E+03    -.291E-01 0.410E-01  
0.319E-01    0.289E-06 0.315E-06 -.630E-06  
          -.555E+00 -.290E+02 0.291E+03    0.559E+00 0.290E+02 -.291E+03    -.284E-02 0.292E-01 -  
.251E-01    -.348E-07 0.413E-06 0.974E-06  
          0.589E-01 0.139E+03 0.289E+03    -.591E-01 -.139E+03 -.289E+03    -.347E-03 0.109E+00 -  
.208E-01    0.341E-06 0.430E-06 0.171E-05  
          -.290E+01 0.377E+02 -.286E+03    0.291E+01 -.377E+02 0.286E+03    -.146E-01 -.399E-02  
0.209E-01    0.631E-06 0.215E-06 -.743E-06  
          -.512E+01 -.128E+03 -.271E+03    0.517E+01 0.128E+03 0.271E+03    -.464E-01 -.862E-01  
0.377E-01    0.554E-06 -.117E-06 -.115E-05  
          0.404E+00 -.137E+03 0.280E+03    -.396E+00 0.137E+03 -.280E+03    -.971E-02 -.127E+00 -  
.156E-01    0.370E-06 0.182E-06 0.107E-05  
          0.195E+01 -.343E+03 0.233E+03    -.195E+01 0.344E+03 -.233E+03    0.906E-02 -.461E+00 -

.547E-01 0.137E-05 0.217E-06 0.174E-05  
-.251E+01 -.197E+03 -.259E+03 0.252E+01 0.197E+03 0.259E+03 -.950E-02 -.198E+00  
0.369E-01 0.848E-06 0.151E-06 -.120E-05  
0.695E+01 -.447E+03 -.198E+03 -.696E+01 0.448E+03 0.198E+03 0.948E-02 -.112E+01  
0.882E-01 0.193E-05 -.129E-07 -.209E-05  
-.454E+00 -.451E+03 0.204E+03 0.455E+00 0.452E+03 -.204E+03 -.212E-02 -.108E+01 -  
.112E+00 0.198E-05 -.140E-05 0.570E-06  
0.172E+01 -.203E+03 0.269E+03 -.171E+01 0.203E+03 -.269E+03 -.483E-02 -.927E-01 -  
.320E-01 0.615E-06 0.292E-06 0.148E-05  
-.207E+01 -.338E+03 -.222E+03 0.212E+01 0.338E+03 0.222E+03 -.443E-01 -.604E+00  
0.538E-01 0.194E-05 -.921E-06 -.209E-05  
0.219E+01 -.136E+03 0.282E+03 -.219E+01 0.136E+03 -.282E+03 -.638E-02 -.126E+00 -  
.944E-02 0.458E-06 0.463E-06 0.141E-05  
0.673E+01 -.339E+03 0.238E+03 -.671E+01 0.340E+03 -.238E+03 -.128E-01 -.462E+00 -  
.460E-01 0.432E-06 0.116E-05 0.249E-05  
0.680E+01 -.193E+03 -.258E+03 -.682E+01 0.193E+03 0.258E+03 0.112E-01 -.146E+00  
0.634E-01 0.142E-06 0.125E-05 -.187E-05  
0.313E+02 -.427E+03 -.198E+03 -.314E+02 0.428E+03 0.197E+03 0.725E-01 -.971E+00  
0.135E+00 -.154E-05 -.148E-06 -.305E-05  
0.546E+01 -.449E+03 0.209E+03 -.546E+01 0.450E+03 -.209E+03 0.529E-03 -.108E+01 -  
.798E-01 0.122E-05 0.962E-06 0.254E-05  
0.369E+01 -.201E+03 0.272E+03 -.369E+01 0.201E+03 -.272E+03 -.762E-03 -.977E-01 -

.306E-01 0.400E-06 0.620E-06 0.176E-05  
0.124E+02 -.332E+03 -.223E+03 -.125E+02 0.332E+03 0.223E+03 0.120E+00 -.535E+00

0.315E-01 0.800E-07 0.380E-06 -.223E-05  
0.219E+01 -.133E+03 0.283E+03 -.220E+01 0.133E+03 -.283E+03 0.524E-03 -.128E+00 -

.444E-02 0.263E-06 0.379E-06 0.113E-05  
0.493E+01 -.332E+03 0.245E+03 -.489E+01 0.332E+03 -.245E+03 -.319E-01 -.476E+00 -

.376E-01 -.243E-06 0.856E-06 0.155E-05  
0.112E+02 -.182E+03 -.258E+03 -.113E+02 0.182E+03 0.258E+03 0.476E-01 -.992E-01 -

.105E+00 0.140E-05 -.171E-06 -.219E-05  
0.318E+02 -.399E+03 -.175E+03 -.321E+02 0.400E+03 0.174E+03 0.297E+00 -.142E+01

0.133E+01 0.131E-05 -.525E-05 -.382E-05  
0.931E+01 -.443E+03 0.219E+03 -.931E+01 0.444E+03 -.219E+03 -.571E-02 -.109E+01 -

.483E-01 -.306E-08 0.114E-05 0.210E-05  
0.169E+01 -.196E+03 0.273E+03 -.170E+01 0.197E+03 -.273E+03 0.549E-02 -.109E+00 -

.511E-01 -.619E-07 0.531E-06 0.129E-05  
0.172E+02 -.310E+03 -.216E+03 -.176E+02 0.310E+03 0.216E+03 0.325E+00 -.220E+00

0.123E+00 0.230E-06 -.788E-06 -.309E-05  
-.104E+01 -.132E+03 0.281E+03 0.103E+01 0.132E+03 -.281E+03 0.103E-01 -.127E+00

0.147E-03 -.335E-06 0.444E-06 0.778E-06  
-.514E+01 -.332E+03 0.239E+03 0.513E+01 0.332E+03 -.239E+03 0.893E-02 -.494E+00 -

.419E-01 -.128E-05 -.242E-06 0.481E-06  
0.155E+01 -.170E+03 -.261E+03 -.167E+01 0.169E+03 0.261E+03 0.119E+00 0.375E+00 -

.930E-01    -.187E-05 0.198E-05 -.261E-05  
              -.684E+01 -.301E+03 -.189E+03    0.638E+01 0.296E+03 0.185E+03    0.505E+00 0.504E+01  
0.404E+01    -.405E-05 -.142E-05 -.192E-05  
              -.628E+00 -.436E+03 0.227E+03    0.625E+00 0.437E+03 -.227E+03    0.173E-02 -.120E+01 -  
.484E-01    -.107E-05 -.552E-07 0.660E-06  
              -.303E+01 -.197E+03 0.268E+03    0.302E+01 0.197E+03 -.268E+03    0.146E-01 -.112E+00 -  
.428E-01    -.689E-06 0.370E-06 0.736E-06  
              0.327E+01 -.280E+03 -.215E+03    -.520E+01 0.280E+03 0.214E+03    0.192E+01 0.651E+00  
0.825E+00    0.803E-06 0.142E-07 -.244E-05  
              -.275E+01 -.134E+03 0.277E+03    0.275E+01 0.134E+03 -.277E+03    0.252E-02 -.123E+00 -  
.185E-01    -.520E-06 0.347E-06 0.404E-06  
              -.602E+01 -.338E+03 0.230E+03    0.602E+01 0.339E+03 -.230E+03    0.113E-01 -.494E+00 -  
.460E-01    -.663E-06 -.162E-05 -.241E-06  
              -.654E+01 -.171E+03 -.257E+03    0.661E+01 0.170E+03 0.257E+03    -.755E-01 0.481E+00  
0.177E-01    -.250E-06 -.102E-05 -.301E-05  
              -.442E+02 -.422E+03 -.184E+03    0.447E+02 0.424E+03 0.183E+03    -.562E+00 -.109E+01  
0.635E+00    -.239E-05 -.309E-05 -.344E-05  
              -.870E+01 -.441E+03 0.211E+03    0.869E+01 0.442E+03 -.211E+03    0.145E-01 -.111E+01 -  
.754E-01    -.176E-05 -.199E-05 -.702E-06  
              -.294E+01 -.201E+03 0.265E+03    0.295E+01 0.201E+03 -.265E+03    -.914E-02 -.110E+00 -  
.204E-01    -.471E-06 -.124E-06 0.323E-06  
              -.146E+02 -.290E+03 -.209E+03    0.165E+02 0.289E+03 0.209E+03    -.197E+01 0.595E+00

0.783E+00 - .222E-05 0.910E-06 -.273E-05  
-.139E+01 -.136E+03 0.277E+03 0.140E+01 0.136E+03 -.277E+03 -.102E-01 -.125E+00 -  
.239E-01 -.210E-06 0.505E-07 0.669E-06  
-.279E+01 -.343E+03 0.230E+03 0.276E+01 0.343E+03 -.230E+03 0.235E-01 -.473E+00 -  
.593E-01 0.315E-06 -.145E-05 0.261E-06  
-.104E+02 -.189E+03 -.258E+03 0.104E+02 0.189E+03 0.258E+03 -.770E-01 -.138E+00 -  
.529E-01 -.264E-06 -.290E-05 -.272E-05  
-.149E+02 -.446E+03 -.196E+03 0.150E+02 0.447E+03 0.196E+03 -.698E-01 -.112E+01  
0.101E+00 0.415E-05 -.399E-05 -.386E-05  
-.550E+01 -.448E+03 0.204E+03 0.551E+01 0.449E+03 -.203E+03 -.483E-02 -.109E+01 -  
.125E+00 -.220E-06 -.321E-05 -.771E-06  
-.911E+00 -.203E+03 0.267E+03 0.920E+00 0.203E+03 -.267E+03 -.911E-02 -.102E+00 -  
.317E-01 0.182E-06 -.319E-06 0.796E-06  
-.163E+02 -.329E+03 -.218E+03 0.166E+02 0.329E+03 0.218E+03 -.360E+00 -.479E+00  
0.435E-01 0.784E-07 -.276E-05 -.422E-05  
-.643E+01 -.256E+03 -.193E+03 0.548E+01 0.248E+03 0.189E+03 0.870E+00 0.781E+01  
0.490E+01 0.267E-05 -.280E-04 -.197E-04  
0.533E+02 -.518E+03 -.136E+03 -.543E+02 0.522E+03 0.140E+03 0.105E+01 -.396E+01 -  
.383E+01 -.656E-05 -.766E-05 -.818E-05  
-.444E+02 -.586E+03 -.447E+03 0.495E+02 0.637E+03 0.481E+03 -.503E+01 -.511E+02 -  
.344E+02 0.343E-04 -.263E-04 -.186E-04

-----

0.359E+01 0.279E+02 0.224E+02 - .327E-12 -.125E-11 0.136E-11 - .364E+01 -.279E+02 -  
.225E+02 0.302E-04 -.646E-04 -.110E-03

| POSITION | TOTAL-FORCE (eV/Angst) |         |           |           |           |
|----------|------------------------|---------|-----------|-----------|-----------|
| -----    |                        |         |           |           |           |
| 1.24575  | 4.02870                | 5.43979 | 0.000053  | 0.001005  | -0.000407 |
| 1.21024  | 4.07581                | 8.43726 | -0.000972 | 0.002594  | -0.001143 |
| 3.70862  | 4.02890                | 5.43965 | 0.000319  | 0.001877  | -0.001092 |
| 3.67998  | 4.07733                | 8.43690 | -0.004023 | -0.000437 | -0.002906 |
| 6.17157  | 4.02854                | 5.43942 | 0.000002  | -0.000151 | -0.001750 |
| 6.14482  | 4.08292                | 8.43295 | -0.002824 | -0.003321 | -0.003193 |
| 8.63513  | 4.02801                | 5.43869 | 0.000786  | -0.000456 | -0.001999 |
| 8.60339  | 4.08732                | 8.43089 | -0.000127 | -0.001192 | -0.002214 |
| 11.09928 | 4.02784                | 5.43885 | 0.000882  | 0.001957  | -0.002713 |
| 11.06021 | 4.08619                | 8.43099 | -0.001738 | 0.000686  | -0.000653 |
| 13.56311 | 4.02807                | 5.43972 | 0.000343  | 0.001607  | -0.001619 |
| 13.52141 | 4.08047                | 8.43349 | 0.000413  | -0.002271 | 0.000286  |
| 2.44241  | 15.48073               | 8.85224 | -0.000585 | -0.005229 | 0.002326  |
| 0.01714  | 15.44624               | 5.32469 | 0.000363  | 0.001530  | -0.001198 |
| 4.86040  | 15.47728               | 8.86623 | 0.001163  | 0.000175  | -0.000399 |
| 2.48016  | 15.44854               | 5.27562 | 0.000382  | -0.001217 | -0.000503 |

|          |          |         |           |           |           |
|----------|----------|---------|-----------|-----------|-----------|
| 4.94382  | 15.44925 | 5.24869 | 0.001813  | -0.003038 | 0.000343  |
| 12.31531 | 15.48242 | 9.00211 | -0.004826 | 0.003148  | 0.002638  |
| 9.86772  | 15.44556 | 5.34176 | 0.000417  | -0.001131 | 0.000924  |
| 14.76279 | 15.48245 | 8.89951 | -0.006032 | -0.000369 | 0.005539  |
| 12.33384 | 15.44510 | 5.36128 | 0.001370  | -0.003219 | -0.001294 |
| 7.40743  | 15.44616 | 5.26463 | 0.002370  | 0.001468  | 0.001472  |
| 6.44846  | 16.34427 | 7.40648 | -0.002249 | -0.001836 | 0.002065  |
| 8.60064  | 16.47644 | 7.89249 | 0.005162  | 0.002045  | 0.005451  |
| 1.24544  | 5.11881  | 5.35500 | 0.000962  | 0.000155  | -0.002464 |
| 2.44348  | 5.83889  | 8.62292 | 0.002413  | -0.004450 | 0.001217  |
| 0.01380  | 5.79530  | 5.28573 | 0.002083  | -0.002473 | 0.000472  |
| 1.21063  | 5.16420  | 8.54151 | 0.000273  | -0.000522 | -0.001882 |
| 2.44351  | 7.27931  | 8.74832 | -0.000073 | -0.001267 | -0.000122 |
| 3.70866  | 5.11896  | 5.35390 | -0.000410 | -0.001640 | 0.000331  |
| 4.90800  | 5.84315  | 8.62123 | -0.001050 | 0.003818  | -0.000749 |
| 2.47701  | 5.79561  | 5.28397 | 0.001454  | -0.000614 | -0.002607 |
| 3.67679  | 5.16572  | 8.54000 | -0.000105 | 0.001629  | -0.000036 |
| 4.90764  | 7.28398  | 8.74777 | 0.000704  | -0.000594 | 0.001041  |
| 6.17184  | 5.11860  | 5.35433 | 0.001488  | 0.000373  | 0.000895  |
| 7.37096  | 5.84929  | 8.62094 | -0.000584 | 0.007051  | -0.002462 |
| 4.94029  | 5.79548  | 5.28340 | 0.000608  | -0.002703 | -0.001175 |
| 6.14080  | 5.17108  | 8.53715 | -0.002537 | 0.002523  | 0.002469  |

|          |          |         |           |           |           |
|----------|----------|---------|-----------|-----------|-----------|
| 7.37071  | 7.28983  | 8.75132 | -0.001939 | 0.001587  | 0.000132  |
| 8.63543  | 5.11820  | 5.35521 | 0.001251  | 0.001342  | -0.001078 |
| 9.83233  | 5.85166  | 8.62337 | 0.002743  | 0.000612  | -0.001099 |
| 7.40374  | 5.79498  | 5.28512 | 0.003465  | -0.002700 | -0.001337 |
| 8.60194  | 5.17528  | 8.53759 | -0.001869 | -0.000437 | -0.000195 |
| 9.83204  | 7.29110  | 8.75719 | -0.001928 | -0.002585 | -0.002431 |
| 11.09930 | 5.11814  | 5.35578 | -0.000857 | -0.003350 | -0.001368 |
| 12.29449 | 5.84673  | 8.62385 | 0.000068  | 0.005709  | -0.002191 |
| 9.86750  | 5.79468  | 5.28678 | -0.000742 | -0.000736 | 0.001551  |
| 11.06261 | 5.17409  | 8.53894 | 0.002668  | 0.002729  | -0.000384 |
| 12.29428 | 7.28729  | 8.75533 | -0.004485 | 0.001213  | -0.001512 |
| 13.56278 | 5.11829  | 5.35605 | 0.002667  | 0.000533  | -0.001992 |
| 14.75895 | 5.83988  | 8.62434 | -0.000201 | -0.002699 | -0.002207 |
| 12.33118 | 5.79480  | 5.28692 | -0.004496 | -0.001494 | 0.002593  |
| 13.52535 | 5.16844  | 8.54022 | -0.003510 | 0.003805  | -0.001413 |
| 14.75917 | 7.28012  | 8.75179 | 0.000948  | 0.002496  | -0.000705 |
| 0.01434  | 7.23830  | 5.19017 | 0.000100  | -0.000221 | 0.000077  |
| 1.24689  | 9.38061  | 5.13160 | 0.000556  | -0.001872 | -0.000002 |
| 1.21085  | 7.98059  | 8.79588 | -0.000913 | -0.000498 | 0.001561  |
| 2.44214  | 10.12243 | 8.87141 | -0.000926 | 0.003252  | -0.005016 |
| 0.01532  | 10.08686 | 5.14049 | -0.002033 | -0.000147 | -0.002398 |
| 1.24606  | 7.94244  | 5.15775 | 0.002015  | -0.002618 | 0.000831  |

|         |          |         |           |           |           |
|---------|----------|---------|-----------|-----------|-----------|
| 1.21082 | 9.41592  | 8.85782 | -0.000724 | 0.004424  | 0.000190  |
| 2.44072 | 11.55513 | 8.88414 | -0.006223 | -0.002805 | 0.001653  |
| 2.47747 | 7.23842  | 5.18585 | 0.002804  | 0.002865  | 0.001311  |
| 3.70997 | 9.38055  | 5.12566 | -0.001068 | -0.003024 | 0.000046  |
| 3.67534 | 7.98360  | 8.79349 | -0.000528 | 0.001015  | 0.000940  |
| 4.90487 | 10.12925 | 8.87518 | 0.000242  | -0.000314 | 0.000057  |
| 2.47867 | 10.08713 | 5.12695 | -0.002265 | 0.001491  | 0.000767  |
| 3.70939 | 7.94242  | 5.15441 | 0.000824  | -0.004021 | -0.001697 |
| 3.67589 | 9.41970  | 8.85445 | -0.001411 | 0.001925  | -0.000136 |
| 4.90263 | 11.56506 | 8.89086 | -0.000568 | 0.001438  | 0.000900  |
| 4.94085 | 7.23830  | 5.18552 | -0.004688 | 0.002238  | 0.000829  |
| 6.17318 | 9.38002  | 5.13173 | 0.002049  | 0.002075  | 0.001834  |
| 6.13864 | 7.99044  | 8.79647 | 0.002471  | -0.000342 | -0.001652 |
| 7.36780 | 10.13760 | 8.89473 | -0.000153 | 0.002973  | 0.000366  |
| 4.94196 | 10.08682 | 5.12700 | 0.004135  | 0.001472  | -0.001155 |
| 6.17284 | 7.94199  | 5.15766 | -0.000047 | 0.000543  | 0.003035  |
| 6.13939 | 9.42660  | 8.86164 | 0.000685  | -0.000306 | -0.002209 |
| 7.36410 | 11.57721 | 8.92935 | -0.000865 | -0.001383 | 0.003500  |
| 7.40426 | 7.23794  | 5.19012 | 0.002161  | 0.001747  | 0.001072  |
| 8.63700 | 9.37970  | 5.14543 | -0.000523 | 0.002934  | 0.000946  |
| 8.60086 | 7.99568  | 8.80617 | 0.001146  | -0.000654 | -0.001047 |
| 9.83068 | 10.14286 | 8.92842 | -0.002472 | 0.002424  | -0.000740 |

|          |          |         |           |           |           |
|----------|----------|---------|-----------|-----------|-----------|
| 7.40553  | 10.08627 | 5.14064 | 0.001205  | -0.003598 | 0.003144  |
| 8.63637  | 7.94166  | 5.16555 | 0.002615  | 0.001764  | -0.001406 |
| 8.60077  | 9.43254  | 8.88532 | -0.006081 | 0.002460  | -0.001240 |
| 9.82927  | 11.58244 | 9.00096 | 0.000789  | 0.003503  | 0.001025  |
| 9.86805  | 7.23787  | 5.19489 | -0.000362 | 0.000085  | -0.000215 |
| 11.10106 | 9.37979  | 5.15156 | -0.003816 | -0.001047 | 0.000664  |
| 11.06331 | 7.99411  | 8.80818 | -0.000251 | -0.001625 | 0.000109  |
| 12.29815 | 10.12943 | 8.90340 | -0.000196 | -0.000978 | 0.001530  |
| 9.86930  | 10.08593 | 5.15631 | -0.005448 | -0.001480 | 0.001410  |
| 11.10021 | 7.94175  | 5.16862 | -0.000596 | -0.003090 | 0.001392  |
| 11.06206 | 9.43062  | 8.88839 | 0.004577  | 0.001819  | 0.002035  |
| 12.30255 | 11.56557 | 8.94694 | 0.002554  | -0.001811 | -0.000804 |
| 12.33169 | 7.23799  | 5.19447 | -0.001013 | 0.000230  | -0.001755 |
| 13.56437 | 9.38021  | 5.14435 | 0.000730  | 0.001634  | -0.000577 |
| 13.52754 | 7.98555  | 8.80171 | -0.000720 | -0.002576 | -0.003128 |
| 14.76233 | 10.12320 | 8.88285 | -0.005207 | 0.000883  | -0.001651 |
| 12.33257 | 10.08637 | 5.15511 | 0.002651  | 0.000512  | -0.001540 |
| 13.56350 | 7.94214  | 5.16485 | -0.000079 | -0.000908 | -0.000371 |
| 13.52731 | 9.42040  | 8.86925 | -0.000246 | 0.002990  | -0.000495 |
| 14.76430 | 11.55727 | 8.90646 | -0.002200 | -0.000617 | 0.001631  |
| 0.01611  | 11.52516 | 5.16621 | -0.001067 | -0.002566 | 0.000391  |
| 1.24770  | 13.67535 | 5.22209 | 0.001877  | -0.002286 | -0.002480 |

|         |          |         |           |           |           |
|---------|----------|---------|-----------|-----------|-----------|
| 1.21217 | 12.26335 | 8.89409 | 0.000769  | -0.000357 | 0.001193  |
| 2.43998 | 14.38728 | 8.86748 | -0.002755 | 0.000706  | 0.000835  |
| 0.01699 | 14.35408 | 5.27295 | -0.000453 | -0.000743 | -0.001988 |
| 1.24794 | 12.22963 | 5.17275 | 0.001058  | 0.000840  | -0.001363 |
| 1.21434 | 13.70818 | 8.88771 | 0.002137  | 0.002540  | 0.003739  |
| 2.47958 | 11.52580 | 5.14547 | -0.001607 | -0.000213 | -0.001485 |
| 3.71218 | 13.67636 | 5.19535 | 0.004660  | 0.000577  | 0.001074  |
| 3.66932 | 12.26248 | 8.88184 | -0.001936 | -0.000024 | -0.000651 |
| 4.89370 | 14.38589 | 8.86075 | 0.004013  | -0.001948 | -0.002141 |
| 2.48000 | 14.35596 | 5.23149 | 0.001283  | -0.001226 | 0.001679  |
| 3.71150 | 12.23022 | 5.15602 | 0.000898  | -0.004525 | 0.001012  |
| 3.66212 | 13.70366 | 8.87117 | -0.004927 | 0.004235  | -0.000666 |
| 4.94290 | 11.52542 | 5.14351 | -0.000043 | -0.001804 | -0.001600 |
| 6.17627 | 13.67505 | 5.20032 | 0.000879  | 0.000600  | 0.000056  |
| 6.13145 | 12.27911 | 8.90591 | 0.005010  | 0.006980  | 0.004585  |
| 7.36614 | 14.42967 | 8.88203 | -0.000206 | 0.001336  | 0.000068  |
| 4.94347 | 14.35627 | 5.21375 | 0.000127  | -0.001864 | 0.001054  |
| 6.17493 | 12.22917 | 5.16623 | -0.001413 | -0.001055 | 0.001574  |
| 6.11879 | 13.72336 | 8.87765 | 0.004413  | 0.000659  | 0.000197  |
| 7.40625 | 11.52413 | 5.16368 | 0.000930  | -0.003364 | 0.000355  |
| 8.63876 | 13.67323 | 5.24377 | 0.001816  | 0.002119  | -0.001349 |
| 8.58939 | 12.29067 | 9.00208 | 0.002146  | -0.000450 | 0.000268  |

|          |          |          |           |           |           |
|----------|----------|----------|-----------|-----------|-----------|
| 9.83855  | 14.39048 | 9.30305  | 0.048271  | -0.006428 | -0.001556 |
| 7.40672  | 14.35386 | 5.23530  | -0.001102 | -0.000346 | -0.000848 |
| 8.63820  | 12.22778 | 5.19800  | 0.000318  | -0.001264 | 0.001077  |
| 8.55571  | 13.73596 | 9.04598  | -0.002847 | 0.001398  | 0.006292  |
| 9.86985  | 11.52338 | 5.18893  | 0.001761  | -0.001982 | -0.000108 |
| 11.10099 | 13.67352 | 5.27669  | 0.003172  | -0.000824 | -0.000973 |
| 11.07378 | 12.27333 | 9.00891  | 0.000136  | 0.004809  | -0.003649 |
| 12.30694 | 14.38896 | 9.00333  | -0.001071 | -0.001814 | 0.002405  |
| 9.86934  | 14.35300 | 5.29564  | 0.002933  | -0.000037 | -0.000092 |
| 11.10161 | 12.22804 | 5.21650  | -0.001108 | -0.002745 | 0.001050  |
| 11.11464 | 13.70636 | 9.07877  | -0.006419 | -0.005577 | -0.001449 |
| 12.33326 | 11.52411 | 5.18815  | -0.000912 | 0.000283  | 0.000534  |
| 13.56430 | 13.67399 | 5.25995  | 0.001599  | 0.000036  | 0.000087  |
| 13.53626 | 12.26601 | 8.93587  | -0.002345 | 0.004277  | 0.001971  |
| 14.76266 | 14.38906 | 8.90426  | -0.003715 | 0.000720  | 0.003706  |
| 12.33397 | 14.35288 | 5.30710  | 0.002773  | -0.001996 | -0.001779 |
| 13.56505 | 12.22870 | 5.20105  | 0.000100  | 0.000075  | -0.001141 |
| 13.54921 | 13.70690 | 8.94399  | 0.000068  | -0.002642 | 0.002264  |
| 9.91126  | 15.53185 | 9.99472  | -0.076450 | -0.096496 | -0.059789 |
| 7.28864  | 16.40884 | 8.69813  | -0.004569 | -0.003028 | -0.006059 |
| 10.01026 | 16.50365 | 10.64498 | 0.047636  | 0.101111  | 0.070827  |

---

total drift: -0.045794 0.026756 -0.022987

---

FREE ENERGIE OF THE ION-ELECTRON SYSTEM (eV)

---

free energy TOTEN = -1209.38888859 eV

energy without entropy= -1209.38888859 energy(sigma->0) = -1209.38888859

d Force = 0.2810612E-04[-0.143E-02, 0.149E-02] d Energy =-0.3732707E-04 0.654E-04

d Force =-0.1572762E+01[-0.148E+01,-0.166E+01] d Ewald =-0.1573120E+01 0.358E-03

---

POTLOK: cpu time 0.1740: real time 0.1749

-----  
stress matrix after NEB project (eV)

-17.73381      -0.25487      0.06422

-0.25487      -15.17868      0.52340

0.06422      0.52340      -19.00161

FORCES: max atom, RMS      0.136861      0.015701

FORCE total and by dimension      0.190368      0.101111

Stress total and by dimension      30.110256      19.001608

Finite differences progress:

Degree of freedom:    4/ 6

Displacement:            2/ 2

Total:                    8/ 12

LATTYP: Found a simple orthorhombic cell.

ALAT            =      14.7806000000

B/A-ratio    =      1.2466138046

C/A-ratio    =      1.4433717170

Lattice vectors:

A1 = ( -14.7806000000, 0.0000000000, 0.0000000000)

A2 = ( 0.0000000000, 0.0000000000, -18.4257000000)

A3 = ( 0.0000000000, -21.3339000000, 0.0000000000)

Analysis of symmetry for initial positions (statically):

=====

Subroutine PRICEL returns:

Original cell was already a primitive cell.

Routine SETGRP: Setting up the symmetry group for a  
simple orthorhombic supercell.

Subroutine GETGRP returns: Found 1 space group operations  
(whereof 1 operations were pure point group operations)  
out of a pool of 8 trial point group operations.

The static configuration has the point symmetry C<sub>1</sub> .

Analysis of symmetry for dynamics (positions and initial velocities):

---

Subroutine PRICEL returns:

Original cell was already a primitive cell.

Routine SETGRP: Setting up the symmetry group for a  
simple orthorhombic supercell.

Subroutine GETGRP returns: Found 1 space group operations  
(whereof 1 operations were pure point group operations)  
out of a pool of 8 trial point group operations.

The dynamic configuration has the point symmetry  $C_1$ .

Analysis of constrained symmetry for selective dynamics:

---

Subroutine PRICEL returns:

Original cell was already a primitive cell.

Routine SETGRP: Setting up the symmetry group for a  
simple orthorhombic supercell.

Subroutine GETGRP returns: Found 1 space group operations  
(whereof 1 operations were pure point group operations)  
out of a pool of 8 trial point group operations.

The constrained configuration has the point symmetry  $C_1$ .

Analysis of structural, dynamic, and magnetic symmetry:

=====

Subroutine PRICEL returns:

Original cell was already a primitive cell.

Routine SETGRP: Setting up the symmetry group for a

simple orthorhombic supercell.

Subroutine GETGRP returns: Found 1 space group operations

(whereof 1 operations were pure point group operations)

out of a pool of 8 trial point group operations.

The magnetic configuration has the point symmetry  $C_1$ .

Subroutine INISYM returns: Found 1 space group operations

(whereof 1 operations are pure point group operations),

and found 1 'primitive' translations

KPOINTS: KPT-Resolved Value to Generate K-Mesh: 0

Automatic generation of k-mesh.

Space group operators:

|            |       |     |     |     |       |
|------------|-------|-----|-----|-----|-------|
| irotdet(A) | alpha | n_x | n_y | n_z | tau_x |
| tau_y      | tau_z |     |     |     |       |

|          |          |          |          |          |          |          |
|----------|----------|----------|----------|----------|----------|----------|
| 1        | 1.000000 | 0.000000 | 1.000000 | 0.000000 | 0.000000 | 0.000000 |
| 0.000000 | 0.000000 |          |          |          |          |          |

Subroutine IBZKPT returns following result:

=====

Found 1 irreducible k-points:

Following reciprocal coordinates:

| Coordinates |          |          | Weight   |
|-------------|----------|----------|----------|
| 0.000000    | 0.000000 | 0.000000 | 1.000000 |

Following cartesian coordinates:

| Coordinates |          |          | Weight   |
|-------------|----------|----------|----------|
| 0.000000    | 0.000000 | 0.000000 | 1.000000 |

WAVPRE: cpu time 0.1304: real time 0.1547

FEWALD: cpu time 0.0027: real time 0.0027

ORTHCH: cpu time 1.0077: real time 1.0109

LOOP+: cpu time 158.5040: real time 159.3373

----- Iteration 10( 1) -----

|           |          |         |           |        |
|-----------|----------|---------|-----------|--------|
| POTLOK:   | cpu time | 0.1699: | real time | 0.1828 |
| SETDIJ:   | cpu time | 0.0100: | real time | 0.0100 |
| EDDIAG:   | cpu time | 1.9276: | real time | 1.9345 |
| RMM-DIIS: | cpu time | 7.0888: | real time | 7.1283 |
| ORTHCH:   | cpu time | 0.3516: | real time | 0.3527 |
| DOS:      | cpu time | 0.0004: | real time | 0.0004 |
| CHARGE:   | cpu time | 0.5256: | real time | 0.5273 |
| MIXING:   | cpu time | 0.0044: | real time | 0.0045 |

-----

|       |          |          |           |         |
|-------|----------|----------|-----------|---------|
| LOOP: | cpu time | 10.0783: | real time | 10.1403 |
|-------|----------|----------|-----------|---------|

eigenvalue-minimisations : 1926

total energy-change (2. order) :-0.2971737E-03 (-0.2515046E+00)

|                    |             |               |           |
|--------------------|-------------|---------------|-----------|
| number of electron | 518.9999702 | magnetization | 0.9999998 |
|--------------------|-------------|---------------|-----------|

|                   |            |               |           |
|-------------------|------------|---------------|-----------|
| augmentation part | 11.7277963 | magnetization | 0.0542749 |
|-------------------|------------|---------------|-----------|

Broyden mixing:

rms(total) = 0.34046E-01      rms(broyden)= 0.33764E-01

rms(prec ) = 0.34835E-01

weight for this iteration      100.00

Free energy of the ion-electron system (eV)

-----  
alpha Z          PSCENC =          233.50077011

Ewald energy    TEWEN =          91319.72103868

-Hartree energ DENC =   -107327.84416934

-exchange       EXHF =           0.00000000

-V(xc)+E(xc)    XCENC =          1743.74701209

PAW double counting =    52179.15613595   -52242.07641762

entropy T\*S     EENTRO =          -0.00000000

eigenvalues     EBANDS =          -5813.30569316

atomic energy   EATOM =          18704.32991668

Solvation    Ediel\_sol =          0.00000000

-----  
free energy      TOTEN =          -1202.77140659 eV

energy without entropy =   -1202.77140659    energy(sigma->0) =   -1202.77140659

-----

----- Iteration 10( 2) -----

POTLOK: cpu time 0.1668: real time 0.1688  
SETDIJ: cpu time 0.0103: real time 0.0103  
EDDIAG: cpu time 1.9190: real time 1.9258  
RMM-DIIS: cpu time 7.2519: real time 7.2880  
ORTHCH: cpu time 0.3512: real time 0.3523  
DOS: cpu time 0.0004: real time 0.0004  
CHARGE: cpu time 0.5251: real time 0.5269  
MIXING: cpu time 0.0044: real time 0.0044

-----

LOOP: cpu time 10.2290: real time 10.2768

eigenvalue-minimisations : 1936

total energy-change (2. order) : 0.6303020E-02 (-0.2068360E-02)

number of electron 518.9999702 magnetization 0.9999998

augmentation part 11.7328676 magnetization 0.0542633

Broyden mixing:

rms(total) = 0.20429E-01      rms(broyden)= 0.20387E-01

rms(prec ) = 0.21678E-01

weight for this iteration      100.00

eigenvalues of (default mixing \* dielectric matrix)

average eigenvalue GAMMA=    0.9658

0.9658

Free energy of the ion-electron system (eV)

-----

alpha Z          PSCENC =          233.50077011

Ewald energy    TEWEN   =          91319.72103868

-Hartree energ DENC   =   -107327.17912229

-exchange       EXHF     =          0.00000000

-V(xc)+E(xc)    XCENC   =          1743.71584306

PAW double counting   =   52170.70488606   -52233.61153832

entropy T\*S     EENTRO =          -0.00000000

eigenvalues     EBANDS =          -5813.94689756

atomic energy   EATOM   =          18704.32991668

Solvation    Ediel\_sol   =          0.00000000

-----

free energy TOTEN = -1202.76510357 eV

energy without entropy = -1202.76510357 energy(sigma->0) = -1202.76510357

-----

----- Iteration 10( 3) -----

|           |          |         |           |        |
|-----------|----------|---------|-----------|--------|
| POTLOK:   | cpu time | 0.1668: | real time | 0.1788 |
| SETDIJ:   | cpu time | 0.0101: | real time | 0.0102 |
| EDDIAG:   | cpu time | 1.9215: | real time | 1.9279 |
| RMM-DIIS: | cpu time | 7.2249: | real time | 7.2640 |
| ORTHCH:   | cpu time | 0.3516: | real time | 0.3529 |
| DOS:      | cpu time | 0.0004: | real time | 0.0004 |
| CHARGE:   | cpu time | 0.5254: | real time | 0.5271 |
| MIXING:   | cpu time | 0.0049: | real time | 0.0050 |

-----

LOOP:  cpu time   10.2056: real time   10.2662

eigenvalue-minimisations : 1942

total energy-change (2. order) : 0.7352045E-03  (-0.6130571E-04)

number of electron   518.9999702 magnetization   0.9999998

augmentation part    11.7314905 magnetization   0.0542670

Broyden mixing:

rms(total) = 0.11971E-01    rms(broyden)= 0.11963E-01

rms(prec ) = 0.12373E-01

weight for this iteration    100.00

eigenvalues of (default mixing \* dielectric matrix)

average eigenvalue GAMMA=   1.4878

0.6986  2.2770

Free energy of the ion-electron system (eV)

-----

alpha Z           PSCENC =       233.50077011

Ewald energy    TEWEN  =       91319.72103868

-Hartree energ DENC   =   -107326.82644566

-exchange       EXHF   =       0.00000000

-V(xc)+E(xc) XCENC = 1743.71988100

PAW double counting = 52165.84725792 -52228.75383079

entropy T\*S EENTRO = -0.00000000

eigenvalues EBANDS = -5814.30295631

atomic energy EATOM = 18704.32991668

Solvation Ediel\_sol = 0.00000000

-----

free energy TOTEN = -1202.76436837 eV

energy without entropy = -1202.76436837 energy(sigma->0) = -1202.76436837

-----

----- Iteration 10( 4) -----

POTLOK: cpu time 0.1659: real time 0.1925

SETDIJ: cpu time 0.0100: real time 0.0101

|           |          |          |           |         |
|-----------|----------|----------|-----------|---------|
| EDDIAG:   | cpu time | 1.9216:  | real time | 1.9279  |
| RMM-DIIS: | cpu time | 7.2853:  | real time | 7.3118  |
| ORTHCH:   | cpu time | 0.3514:  | real time | 0.3525  |
| DOS:      | cpu time | 0.0004:  | real time | 0.0004  |
| CHARGE:   | cpu time | 0.5255:  | real time | 0.5274  |
| MIXING:   | cpu time | 0.0051:  | real time | 0.0051  |
| -----     |          |          |           |         |
| LOOP:     | cpu time | 10.2652: | real time | 10.3278 |

eigenvalue-minimisations : 1937

total energy-change (2. order) : 0.1337269E-04 (-0.5378449E-04)

number of electron      518.9999702 magnetization      0.9999998

augmentation part      11.7309957 magnetization      0.0542750

Broyden mixing:

rms(total) = 0.51700E-02      rms(broyden)= 0.51642E-02

rms(prec ) = 0.55558E-02

weight for this iteration      100.00

eigenvalues of (default mixing \* dielectric matrix)

average eigenvalue GAMMA=      1.3852

2.2412   0.9572   0.9572

Free energy of the ion-electron system (eV)

---

alpha Z        PSCENC =        233.50077011

Ewald energy    TEWEN =        91319.72103868

-Hartree energ DENC =    -107326.20384288

-exchange       EXHF =            0.00000000

-V(xc)+E(xc)    XCENC =        1743.71342338

PAW double counting =    52157.40812167    -52220.31206816

entropy T\*S     EENTRO =        -0.00000000

eigenvalues     EBANDS =        -5814.92171448

atomic energy   EATOM =        18704.32991668

Solvation    Ediel\_sol =        0.00000000

---

free energy     TOTEN =        -1202.76435500 eV

energy without entropy =    -1202.76435500    energy(sigma->0) =    -1202.76435500

---

----- Iteration 10( 5) -----

|           |          |         |           |         |
|-----------|----------|---------|-----------|---------|
| POTLOK:   | cpu time | 0.1720: | real time | 0.1849  |
| SETDIJ:   | cpu time | 0.0102: | real time | 0.0102  |
| EDDIAG:   | cpu time | 1.9218: | real time | 1.9282  |
| RMM-DIIS: | cpu time | 7.0035: | real time | 7.0271  |
| ORTHCH:   | cpu time | 0.3507: | real time | 0.3518  |
| DOS:      | cpu time | 0.0004: | real time | 0.0004  |
| CHARGE:   | cpu time | 0.5256: | real time | 0.5275  |
| MIXING:   | cpu time | 0.0053: | real time | 0.0053  |
| -----     |          |         |           |         |
| LOOP:     | cpu time | 9.9894: | real time | 10.0354 |

eigenvalue-minimisations : 1913

total energy-change (2. order) : 0.2074007E-04 (-0.1306249E-04)

number of electron 518.9999702 magnetization 0.9999998

augmentation part 11.7318008 magnetization 0.0542747

Broyden mixing:

rms(total) = 0.15110E-02      rms(broyden)= 0.15052E-02

rms(prec ) = 0.17044E-02

weight for this iteration      100.00

eigenvalues of (default mixing \* dielectric matrix)

average eigenvalue GAMMA=    1.4501

2.0630   2.0630   0.8373   0.8373

Free energy of the ion-electron system (eV)

-----

alpha Z          PSCENC =          233.50077011

Ewald energy    TEWEN =          91319.72103868

-Hartree energy DENC =   -107326.10115538

-exchange       EXHF =            0.00000000

-V(xc)+E(xc)    XCENC =          1743.71003350

PAW double counting =    52156.69148190   -52219.59476051

entropy T\*S     EENTRO =          -0.00000000

eigenvalues     EBANDS =         -5815.02165924

atomic energy   EATOM =          18704.32991668

Solvation    Ediel\_sol =          0.00000000

-----

free energy      TOTEN =         -1202.76433426 eV

energy without entropy = -1202.76433426 energy(sigma->0) = -1202.76433426

-----

----- Iteration 10( 6) -----

|           |          |         |           |        |
|-----------|----------|---------|-----------|--------|
| POTLOK:   | cpu time | 0.1665: | real time | 0.1680 |
| SETDIJ:   | cpu time | 0.0101: | real time | 0.0102 |
| EDDIAG:   | cpu time | 1.9197: | real time | 1.9263 |
| RMM-DIIS: | cpu time | 7.1489: | real time | 7.1881 |
| ORTHCH:   | cpu time | 0.3541: | real time | 0.3554 |
| DOS:      | cpu time | 0.0004: | real time | 0.0004 |
| CHARGE:   | cpu time | 0.5248: | real time | 0.5267 |
| MIXING:   | cpu time | 0.0057: | real time | 0.0056 |

-----

|       |          |          |           |         |
|-------|----------|----------|-----------|---------|
| LOOP: | cpu time | 10.1302: | real time | 10.1808 |
|-------|----------|----------|-----------|---------|

eigenvalue-minimisations : 1912

total energy-change (2. order) :-0.1846050E-04 (-0.7981115E-06)

number of electron      518.9999702 magnetization      0.9999998

augmentation part      11.7316836 magnetization      0.0542767

Broyden mixing:

rms(total) = 0.56481E-03      rms(broyden)= 0.56449E-03

rms(prec ) = 0.74747E-03

weight for this iteration      100.00

eigenvalues of (default mixing \* dielectric matrix)

average eigenvalue GAMMA=      1.4238

2.4879   1.8807   0.8758   0.8758   0.9988

Free energy of the ion-electron system (eV)

-----

alpha Z      PSCENC =      233.50077011

Ewald energy      TEWEN =      91319.72103868

-Hartree energ DENC =      -107326.00840405

-exchange      EXHF =      0.00000000

-V(xc)+E(xc)      XCENC =      1743.71117864

PAW double counting = 52156.14806443 -52219.05215532

entropy T\*S EENTRO = -0.00000000

eigenvalues EBANDS = -5815.11476190

atomic energy EATOM = 18704.32991668

Solvation Ediel\_sol = 0.00000000

-----  
free energy TOTEN = -1202.76435272 eV

energy without entropy = -1202.76435272 energy(sigma->0) = -1202.76435272

----- Iteration 10( 7) -----

POTLOK: cpu time 0.1660: real time 0.1971

SETDIJ: cpu time 0.0101: real time 0.0101

EDDIAG: cpu time 1.9194: real time 1.9265

|           |          |         |           |        |
|-----------|----------|---------|-----------|--------|
| RMM-DIIS: | cpu time | 6.2275: | real time | 6.2826 |
| ORTHCH:   | cpu time | 0.3513: | real time | 0.3524 |
| DOS:      | cpu time | 0.0004: | real time | 0.0004 |
| CHARGE:   | cpu time | 0.5255: | real time | 0.5272 |
| MIXING:   | cpu time | 0.0056: | real time | 0.0056 |
| -----     |          |         |           |        |
| LOOP:     | cpu time | 9.2059: | real time | 9.3020 |

eigenvalue-minimisations : 1708

total energy-change (2. order) :-0.1540860E-04 (-0.1759286E-06)

number of electron 518.9999702 magnetization 0.9999998

augmentation part 11.7316010 magnetization 0.0542771

Broyden mixing:

rms(total) = 0.28915E-03 rms(broyden)= 0.28864E-03

rms(prec ) = 0.44410E-03

weight for this iteration 100.00

eigenvalues of (default mixing \* dielectric matrix)

average eigenvalue GAMMA= 1.3933

2.5515 1.6688 1.6688 0.8784 0.8784 0.7137

Free energy of the ion-electron system (eV)

-----

alpha Z        PSCENC =        233.50077011

Ewald energy    TEWEN =        91319.72103868

-Hartree energy DENC =    -107325.92888458

-exchange       EXHF =            0.00000000

-V(xc)+E(xc)    XCENC =        1743.71094607

PAW double counting =    52155.94145097    -52218.84560957

entropy T\*S     EENTRO =        -0.00000000

eigenvalues     EBANDS =        -5815.19399650

atomic energy   EATOM =        18704.32991668

Solvation    Ediel\_sol =        0.00000000

-----

free energy     TOTEN =        -1202.76436813 eV

energy without entropy =    -1202.76436813    energy(sigma->0) =    -1202.76436813

-----

----- Iteration 10( 8) -----

|           |          |         |           |        |
|-----------|----------|---------|-----------|--------|
| POTLOK:   | cpu time | 0.1671: | real time | 0.1731 |
| SETDIJ:   | cpu time | 0.0100: | real time | 0.0100 |
| EDDIAG:   | cpu time | 1.9225: | real time | 1.9284 |
| RMM-DIIS: | cpu time | 6.0438: | real time | 6.0772 |
| ORTHCH:   | cpu time | 0.3524: | real time | 0.3533 |
| DOS:      | cpu time | 0.0004: | real time | 0.0004 |
| CHARGE:   | cpu time | 0.5246: | real time | 0.5261 |
| MIXING:   | cpu time | 0.0059: | real time | 0.0059 |
| -----     |          |         |           |        |
| LOOP:     | cpu time | 9.0266: | real time | 9.0745 |

eigenvalue-minimisations : 1636

total energy-change (2. order) :-0.1935178E-04 (-0.9853450E-07)

number of electron 518.9999702 magnetization 0.9999998

augmentation part 11.7316145 magnetization 0.0542773

Broyden mixing:

rms(total) = 0.16548E-03 rms(broyden)= 0.16542E-03

rms(prec ) = 0.30802E-03

weight for this iteration      100.00

eigenvalues of (default mixing \* dielectric matrix)

average eigenvalue GAMMA=    1.4360

2.4927   2.4927   1.6429   1.0010   0.8770   0.8770   0.6688

Free energy of the ion-electron system (eV)

-----  
alpha Z          PSCENC =          233.50077011

Ewald energy    TEWEN   =          91319.72103868

-Hartree energ DENC   =   -107325.86393928

-exchange       EXHF     =          0.00000000

-V(xc)+E(xc)    XCENC   =          1743.71042429

PAW double counting   =    52156.00614932   -52218.91022745

entropy T\*S     EENTRO =          -0.00000000

eigenvalues     EBANDS =          -5815.25851984

atomic energy   EATOM   =          18704.32991668

Solvation    Ediel\_sol   =          0.00000000

-----  
free energy      TOTEN   =          -1202.76438748 eV

energy without entropy = -1202.76438748 energy(sigma->0) = -1202.76438748

-----

----- Iteration 10( 9) -----

|           |          |         |           |        |
|-----------|----------|---------|-----------|--------|
| POTLOK:   | cpu time | 0.1674: | real time | 0.1705 |
| SETDIJ:   | cpu time | 0.0100: | real time | 0.0101 |
| EDDIAG:   | cpu time | 1.9209: | real time | 1.9275 |
| RMM-DIIS: | cpu time | 6.1095: | real time | 6.1376 |
| ORTHCH:   | cpu time | 0.3526: | real time | 0.3539 |
| DOS:      | cpu time | 0.0004: | real time | 0.0004 |
| CHARGE:   | cpu time | 0.5255: | real time | 0.5274 |
| MIXING:   | cpu time | 0.0062: | real time | 0.0062 |
| -----     |          |         |           |        |
| LOOP:     | cpu time | 9.0925: | real time | 9.1334 |

eigenvalue-minimisations : 1653

total energy-change (2. order) :-0.2536154E-04 (-0.1456948E-06)

number of electron      518.9999702 magnetization      0.9999998

augmentation part      11.7316249 magnetization      0.0542776

Broyden mixing:

rms(total) = 0.12063E-03      rms(broyden)= 0.12057E-03

rms(prec ) = 0.20687E-03

weight for this iteration      100.00

eigenvalues of (default mixing \* dielectric matrix)

average eigenvalue GAMMA=      1.4711

2.9324   2.6041   1.6868   1.1414   0.8962   0.8962   0.9580   0.6537

Free energy of the ion-electron system (eV)

-----

alpha Z      PSCENC =      233.50077011

Ewald energy      TEWEN =      91319.72103868

-Hartree energ DENC =      -107325.77995669

-exchange      EXHF =      0.00000000

-V(xc)+E(xc)      XCENC =      1743.70990977

PAW double counting =      52156.10974517      -52219.01376910

entropy T\*S    EENTRO =        -0.00000000

eigenvalues    EBANDS =       -5815.34206746

atomic energy  EATOM  =       18704.32991668

Solvation    Ediel\_sol  =        0.00000000

-----  
free energy    TOTEN  =       -1202.76441284 eV

energy without entropy =    -1202.76441284    energy(sigma->0) =    -1202.76441284

-----  
----- Iteration        10( 10) -----

POTLOK:    cpu time    0.1650: real time    0.1827

SETDIJ:    cpu time    0.0100: real time    0.0100

EDDIAG:    cpu time    1.9217: real time    1.9279

RMM-DIIS:    cpu time    5.9997: real time    6.0351

ORTHCH: cpu time 0.3521: real time 0.3532

DOS: cpu time 0.0004: real time 0.0004

CHARGE: cpu time 0.5269: real time 0.5284

MIXING: cpu time 0.0066: real time 0.0067

-----

LOOP: cpu time 8.9823: real time 9.0443

eigenvalue-minimisations : 1619

total energy-change (2. order) :-0.1927689E-04 (-0.9570528E-07)

number of electron 518.9999702 magnetization 0.9999998

augmentation part 11.7316102 magnetization 0.0542779

Broyden mixing:

rms(total) = 0.60827E-04 rms(broyden)= 0.60723E-04

rms( prec ) = 0.11105E-03

weight for this iteration 100.00

eigenvalues of (default mixing \* dielectric matrix)

average eigenvalue GAMMA= 1.5826

3.9614 2.5797 1.9855 1.3829 1.1559 0.8810 0.8810 0.7712 0.6443

Free energy of the ion-electron system (eV)

---

alpha Z        PSCENC =        233.50077011

Ewald energy    TEWEN =        91319.72103868

-Hartree energ DENC =    -107325.71466375

-exchange       EXHF =            0.00000000

-V(xc)+E(xc)    XCENC =        1743.70962375

PAW double counting =    52156.15930614    -52219.06330216

entropy T\*S     EENTRO =        -0.00000000

eigenvalues     EBANDS =        -5815.40712158

atomic energy   EATOM =        18704.32991668

Solvation    Ediel\_sol =        0.00000000

---

free energy     TOTEN =        -1202.76443212 eV

energy without entropy =    -1202.76443212    energy(sigma->0) =    -1202.76443212

---

----- Iteration 10( 11) -----

|           |          |         |           |        |
|-----------|----------|---------|-----------|--------|
| POTLOK:   | cpu time | 0.1683: | real time | 0.1882 |
| SETDIJ:   | cpu time | 0.0101: | real time | 0.0102 |
| EDDIAG:   | cpu time | 1.9196: | real time | 1.9264 |
| RMM-DIIS: | cpu time | 5.7967: | real time | 5.8290 |
| ORTHCH:   | cpu time | 0.3510: | real time | 0.3521 |
| DOS:      | cpu time | 0.0004: | real time | 0.0004 |
| CHARGE:   | cpu time | 0.5254: | real time | 0.5273 |
| MIXING:   | cpu time | 0.0071: | real time | 0.0072 |
| -----     |          |         |           |        |
| LOOP:     | cpu time | 8.7786: | real time | 8.8408 |

eigenvalue-minimisations : 1568

total energy-change (2. order) :-0.1145449E-04 (-0.5505809E-07)

number of electron 518.9999702 magnetization 0.9999998

augmentation part 11.7316021 magnetization 0.0542782

Broyden mixing:

rms(total) = 0.50139E-04 rms(broyden)= 0.50071E-04

rms(prec ) = 0.72407E-04

weight for this iteration      100.00

eigenvalues of (default mixing \* dielectric matrix)

average eigenvalue GAMMA=    1.6542

5.0456  2.5796  2.0862  1.6217  1.1284  0.9061  0.9061  0.9277  0.7055  0.6352

Free energy of the ion-electron system (eV)

-----  
alpha Z          PSCENC =          233.50077011

Ewald energy    TEWEN =          91319.72103868

-Hartree energ DENC =    -107325.66981805

-exchange       EXHF =            0.00000000

-V(xc)+E(xc)    XCENC =          1743.70943150

PAW double counting =    52156.17405541    -52219.07803509

entropy T\*S     EENTRO =          -0.00000000

eigenvalues     EBANDS =          -5815.45180282

atomic energy   EATOM =          18704.32991668

Solvation    Ediel\_sol =          0.00000000

-----  
free energy      TOTEN =          -1202.76444357 eV

energy without entropy =    -1202.76444357    energy(sigma->0) =    -1202.76444357

-----

----- Iteration 10( 12) -----

|           |          |         |           |        |
|-----------|----------|---------|-----------|--------|
| POTLOK:   | cpu time | 0.1650: | real time | 0.1674 |
| SETDIJ:   | cpu time | 0.0102: | real time | 0.0103 |
| EDDIAG:   | cpu time | 1.9252: | real time | 1.9321 |
| RMM-DIIS: | cpu time | 5.2116: | real time | 5.2291 |
| ORTHCH:   | cpu time | 0.3560: | real time | 0.3570 |
| DOS:      | cpu time | 0.0004: | real time | 0.0004 |
| CHARGE:   | cpu time | 0.5257: | real time | 0.5275 |
| MIXING:   | cpu time | 0.0077: | real time | 0.0077 |
| -----     |          |         |           |        |
| LOOP:     | cpu time | 8.2018: | real time | 8.2314 |

eigenvalue-minimisations : 1406

total energy-change (2. order) :-0.4808222E-05 (-0.1453725E-07)

number of electron      518.9999702 magnetization      0.9999998

augmentation part      11.7316040 magnetization      0.0542782

Broyden mixing:

rms(total) = 0.27747E-04      rms(broyden)= 0.27736E-04

rms(prec ) = 0.46030E-04

weight for this iteration      100.00

eigenvalues of (default mixing \* dielectric matrix)

average eigenvalue GAMMA=      1.7605

6.0773   2.6650   2.3286   1.8483   1.3352   1.0815   0.8993   0.8993   0.9229   0.6792

0.6291

Free energy of the ion-electron system (eV)

-----

alpha Z      PSCENC =      233.50077011

Ewald energy      TEWEN =      91319.72103868

-Hartree energ      DENC =      -107325.65564142

-exchange      EXHF =      0.00000000

-V(xc)+E(xc)      XCENC =      1743.70936493

PAW double counting =      52156.17070234      -52219.07467802

entropy T\*S    EENTRO =        -0.00000000

eigenvalues    EBANDS =        -5815.46592168

atomic energy  EATOM  =        18704.32991668

Solvation    Ediel\_sol  =        0.00000000

-----  
free energy    TOTEN  =        -1202.76444838 eV

energy without entropy =    -1202.76444838    energy(sigma->0) =    -1202.76444838

-----  
----- Iteration    10( 13) -----

POTLOK:    cpu time    0.1644: real time    0.1655

SETDIJ:    cpu time    0.0100: real time    0.0101

EDDIAG:    cpu time    1.9203: real time    1.9267

RMM-DIIS:    cpu time    5.3282: real time    5.3574

ORTHCH: cpu time 0.3507: real time 0.3518

DOS: cpu time 0.0004: real time 0.0004

CHARGE: cpu time 0.5251: real time 0.5270

MIXING: cpu time 0.0081: real time 0.0082

-----

LOOP: cpu time 8.3072: real time 8.3471

eigenvalue-minimisations : 1453

total energy-change (2. order) :-0.5264308E-05 (-0.1765159E-07)

number of electron 518.9999702 magnetization 0.9999998

augmentation part 11.7316075 magnetization 0.0542781

Broyden mixing:

rms(total) = 0.18207E-04 rms(broyden)= 0.18188E-04

rms(prec ) = 0.27367E-04

weight for this iteration 100.00

eigenvalues of (default mixing \* dielectric matrix)

average eigenvalue GAMMA= 1.7888

6.5878 2.9902 2.4734 1.7132 1.7132 1.0251 1.0251 0.9093 0.9093 0.8235

0.6680 0.6270

Free energy of the ion-electron system (eV)

-----

alpha Z        PSCENC =        233.50077011

Ewald energy    TEWEN =        91319.72103868

-Hartree energy DENC =   -107325.64411601

-exchange       EXHF =            0.00000000

-V(xc)+E(xc)    XCENC =        1743.70931566

PAW double counting =    52156.16382134   -52219.06779351

entropy T\*S     EENTRO =        -0.00000000

eigenvalues     EBANDS =       -5815.47740660

atomic energy   EATOM =        18704.32991668

Solvation    Ediel\_sol =        0.00000000

-----

free energy     TOTEN =       -1202.76445364 eV

energy without entropy =   -1202.76445364    energy(sigma->0) =   -1202.76445364

-----

----- Iteration 10( 14) -----

|           |          |         |           |        |
|-----------|----------|---------|-----------|--------|
| POTLOK:   | cpu time | 0.1629: | real time | 0.1640 |
| SETDIJ:   | cpu time | 0.0100: | real time | 0.0100 |
| EDDIAG:   | cpu time | 1.9221: | real time | 1.9293 |
| RMM-DIIS: | cpu time | 4.8527: | real time | 4.9316 |
| ORTHCH:   | cpu time | 0.3507: | real time | 0.3520 |
| DOS:      | cpu time | 0.0004: | real time | 0.0004 |
| CHARGE:   | cpu time | 0.5258: | real time | 0.5277 |
| MIXING:   | cpu time | 0.0085: | real time | 0.0085 |

-----

|       |          |         |           |        |
|-------|----------|---------|-----------|--------|
| LOOP: | cpu time | 7.8329: | real time | 7.9235 |
|-------|----------|---------|-----------|--------|

eigenvalue-minimisations : 1322

total energy-change (2. order) :-0.2259716E-05 (-0.5333169E-08)

|                    |             |               |           |
|--------------------|-------------|---------------|-----------|
| number of electron | 518.9999702 | magnetization | 0.9999998 |
|--------------------|-------------|---------------|-----------|

|                   |            |               |           |
|-------------------|------------|---------------|-----------|
| augmentation part | 11.7316069 | magnetization | 0.0542781 |
|-------------------|------------|---------------|-----------|

Broyden mixing:

|                          |                           |
|--------------------------|---------------------------|
| rms(total) = 0.11908E-04 | rms(broyden)= 0.11905E-04 |
|--------------------------|---------------------------|

rms(prec ) = 0.17028E-04

weight for this iteration 100.00

eigenvalues of (default mixing \* dielectric matrix)

average eigenvalue GAMMA= 1.8681

7.0879 3.6364 2.5034 2.1028 1.8070 1.3174 0.8994 0.8994 1.0608 0.9581

0.7310 0.6567 0.6254

Free energy of the ion-electron system (eV)

-----

alpha Z PSCENC = 233.50077011

Ewald energy TEWEN = 91319.72103868

-Hartree energy DENC = -107325.64047641

-exchange EXHF = 0.00000000

-V(xc)+E(xc) XCENC = 1743.70931639

PAW double counting = 52156.16336097 -52219.06733438

entropy T\*S EENTRO = -0.00000000

eigenvalues EBANDS = -5815.48104796

atomic energy EATOM = 18704.32991668

Solvation Ediel\_sol = 0.00000000

-----

free energy TOTEN = -1202.76445590 eV

energy without entropy = -1202.76445590 energy(sigma->0) = -1202.76445590

-----

----- Iteration 10( 15) -----

|           |          |         |           |        |
|-----------|----------|---------|-----------|--------|
| POTLOK:   | cpu time | 0.1668: | real time | 0.1897 |
| SETDIJ:   | cpu time | 0.0101: | real time | 0.0101 |
| EDDIAG:   | cpu time | 1.9220: | real time | 1.9286 |
| RMM-DIIS: | cpu time | 4.8534: | real time | 4.8690 |
| ORTHCH:   | cpu time | 0.3539: | real time | 0.3550 |
| DOS:      | cpu time | 0.0004: | real time | 0.0004 |
| CHARGE:   | cpu time | 0.5248: | real time | 0.5267 |
| MIXING:   | cpu time | 0.0088: | real time | 0.0088 |

-----

|       |          |         |           |        |
|-------|----------|---------|-----------|--------|
| LOOP: | cpu time | 7.8402: | real time | 7.8884 |
|-------|----------|---------|-----------|--------|

eigenvalue-minimisations : 1324

total energy-change (2. order) :-0.1461369E-05 (-0.2735595E-08)

number of electron 518.9999702 magnetization 0.9999998

augmentation part 11.7316060 magnetization 0.0542782

Broyden mixing:

rms(total) = 0.53293E-05 rms(broyden)= 0.53235E-05

rms(prec) = 0.87072E-05

weight for this iteration 100.00

eigenvalues of (default mixing \* dielectric matrix)

average eigenvalue GAMMA= 1.9103

7.6150 4.1998 2.5803 2.4116 1.6246 1.6246 1.0315 1.0315 0.8917 0.8917

0.8726 0.7007 0.6457 0.6234

Free energy of the ion-electron system (eV)

-----

alpha Z PSCENC = 233.50077011

Ewald energy TEWEN = 91319.72103868

-Hartree energ DENC = -107325.63920133

-exchange EXHF = 0.00000000

-V(xc)+E(xc) XCENC = 1743.70933082

PAW double counting = 52156.16472978 -52219.06870773

entropy T\*S EENTRO = -0.00000000

eigenvalues EBANDS = -5815.48233439

atomic energy EATOM = 18704.32991668

Solvation Ediel\_sol = 0.00000000

-----

free energy TOTEN = -1202.76445736 eV

energy without entropy = -1202.76445736 energy(sigma->0) = -1202.76445736

-----

----- Iteration 10( 16) -----

POTLOK: cpu time 0.1667: real time 0.1719

SETDIJ: cpu time 0.0100: real time 0.0100

|           |          |         |           |        |
|-----------|----------|---------|-----------|--------|
| EDDIAG:   | cpu time | 1.9210: | real time | 1.9276 |
| RMM-DIIS: | cpu time | 4.6455: | real time | 4.6684 |
| ORTHCH:   | cpu time | 0.3509: | real time | 0.3519 |
| DOS:      | cpu time | 0.0004: | real time | 0.0004 |
| CHARGE:   | cpu time | 0.5252: | real time | 0.5267 |
| MIXING:   | cpu time | 0.0092: | real time | 0.0092 |
| -----     |          |         |           |        |
| LOOP:     | cpu time | 7.6289: | real time | 7.6661 |

eigenvalue-minimisations : 1220

total energy-change (2. order) :-0.8158968E-06 (-0.8466658E-09)

|                    |             |               |           |
|--------------------|-------------|---------------|-----------|
| number of electron | 518.9999702 | magnetization | 0.9999998 |
| augmentation part  | 11.7316059  | magnetization | 0.0542782 |

Broyden mixing:

rms(total) = 0.36824E-05      rms(broyden)= 0.36812E-05

rms( prec ) = 0.59177E-05

weight for this iteration      100.00

eigenvalues of (default mixing \* dielectric matrix)

average eigenvalue GAMMA=    1.9184

7.8607  4.5713  2.6667  2.4035  1.7425  1.6520  1.1407  1.1407  0.8969  0.8969

1.0072 0.8482 0.6867 0.6401 0.6222

Free energy of the ion-electron system (eV)

-----

alpha Z        PSCENC =        233.50077011

Ewald energy    TEWEN =        91319.72103868

-Hartree energ DENC =    -107325.63876468

-exchange       EXHF =            0.00000000

-V(xc)+E(xc)    XCENC =        1743.70933577

PAW double counting =    52156.16565357    -52219.06963256

entropy T\*S     EENTRO =        -0.00000000

eigenvalues     EBANDS =        -5815.48277576

atomic energy   EATOM =        18704.32991668

Solvation    Ediel\_sol =        0.00000000

-----

free energy     TOTEN =        -1202.76445818 eV

energy without entropy =    -1202.76445818    energy(sigma->0) =    -1202.76445818

-----

----- Iteration 10( 17) -----

POTLOK: cpu time 0.1701: real time 0.1723  
SETDIJ: cpu time 0.0198: real time 0.0200  
EDDIAG: cpu time 1.9276: real time 1.9341  
RMM-DIIS: cpu time 4.6640: real time 4.6775  
ORTHCH: cpu time 0.3515: real time 0.3524  
DOS: cpu time 0.0004: real time 0.0004  
CHARGE: cpu time 0.5250: real time 0.5265  
MIXING: cpu time 0.0095: real time 0.0095

-----

LOOP: cpu time 7.6680: real time 7.6927

eigenvalue-minimisations : 1235

total energy-change (2. order) :-0.7201379E-06 (-0.3859668E-09)

number of electron 518.9999702 magnetization 0.9999998

augmentation part 11.7316059 magnetization 0.0542781

Broyden mixing:

rms(total) = 0.21313E-05      rms(broyden)= 0.21302E-05

rms(prec ) = 0.36267E-05

weight for this iteration      100.00

eigenvalues of (default mixing \* dielectric matrix)

average eigenvalue GAMMA=    1.9553

8.0131   5.0613   2.7941   2.5083   2.2329   1.5764   1.5764   1.0632   1.0632   0.8939

0.8939   0.8881   0.7815   0.6792   0.6368   0.6224

Free energy of the ion-electron system (eV)

-----

alpha Z          PSCENC =          233.50077011

Ewald energy    TEWEN =          91319.72103868

-Hartree energy DENC =   -107325.63831621

-exchange       EXHF =            0.00000000

-V(xc)+E(xc)    XCENC =          1743.70933443

PAW double counting =    52156.16659234   -52219.07056963

entropy T\*S     EENTRO =          -0.00000000

eigenvalues     EBANDS =       -5815.48322531

atomic energy   EATOM =          18704.32991668

Solvation    Ediel\_sol =          0.00000000

-----  
free energy    TOTEN    =    -1202.76445890 eV

energy without entropy =    -1202.76445890    energy(sigma->0) =    -1202.76445890

----- Iteration    10( 18) -----

|           |          |         |           |        |
|-----------|----------|---------|-----------|--------|
| POTLOK:   | cpu time | 0.1667: | real time | 0.1806 |
| SETDIJ:   | cpu time | 0.0100: | real time | 0.0101 |
| EDDIAG:   | cpu time | 1.9242: | real time | 1.9306 |
| RMM-DIIS: | cpu time | 4.4554: | real time | 4.4808 |
| ORTHCH:   | cpu time | 0.3505: | real time | 0.3515 |
| DOS:      | cpu time | 0.0004: | real time | 0.0004 |
| CHARGE:   | cpu time | 0.5248: | real time | 0.5264 |
| MIXING:   | cpu time | 0.0095: | real time | 0.0095 |

-----  
LOOP:  cpu time    7.4415: real time    7.4899

eigenvalue-minimisations : 1135

total energy-change (2. order) :-0.2813831E-06  (-0.2184004E-09)

number of electron    518.9999702 magnetization        0.9999998

augmentation part     11.7316059 magnetization       0.0542781

Broyden mixing:

rms(total) = 0.15589E-05    rms(broyden)= 0.15577E-05

rms(prec ) = 0.23097E-05

weight for this iteration    100.00

eigenvalues of (default mixing \* dielectric matrix)

average eigenvalue GAMMA=    1.9800

8.2552  5.5602  3.1942  2.6087  2.2053  1.6378  1.6378  1.1304  1.1304  0.8995

0.8995  0.9286  0.9286  0.7081  0.6753  0.6236  0.6361

Free energy of the ion-electron system (eV)

-----  
alpha Z           PSCENC =       233.50077011

Ewald energy    TEWEN  =       91319.72103868

-Hartree energ DENC = -107325.63812638

-exchange EXHF = 0.00000000

-V(xc)+E(xc) XCENC = 1743.70933623

PAW double counting = 52156.16739553 -52219.07137261

entropy T\*S EENTRO = -0.00000000

eigenvalues EBANDS = -5815.48341744

atomic energy EATOM = 18704.32991668

Solvation Ediel\_sol = 0.00000000

-----  
free energy TOTEN = -1202.76445918 eV

energy without entropy = -1202.76445918 energy(sigma->0) = -1202.76445918

----- Iteration 10( 19) -----

|           |          |         |           |        |
|-----------|----------|---------|-----------|--------|
| POTLOK:   | cpu time | 0.1666: | real time | 0.1918 |
| SETDIJ:   | cpu time | 0.0101: | real time | 0.0101 |
| EDDIAG:   | cpu time | 1.9217: | real time | 1.9285 |
| RMM-DIIS: | cpu time | 4.1372: | real time | 4.1606 |
| ORTHCH:   | cpu time | 0.3523: | real time | 0.3534 |
| DOS:      | cpu time | 0.0003: | real time | 0.0003 |
| -----     |          |         |           |        |
| LOOP:     | cpu time | 6.5882: | real time | 6.6448 |

eigenvalue-minimisations : 978

total energy-change (2. order) :-0.4837057E-07 (-0.1165077E-09)

|                    |             |               |           |
|--------------------|-------------|---------------|-----------|
| number of electron | 518.9999702 | magnetization | 0.9999998 |
| augmentation part  | 11.7316059  | magnetization | 0.0542781 |

Free energy of the ion-electron system (eV)

|                     |          |                  |                 |
|---------------------|----------|------------------|-----------------|
| -----               |          |                  |                 |
| alpha Z             | PSCENC = | 233.50077011     |                 |
| Ewald energy        | TEWEN =  | 91319.72103868   |                 |
| -Hartree energ      | DENC =   | -107325.63810344 |                 |
| -exchange           | EXHF =   | 0.00000000       |                 |
| -V(xc)+E(xc)        | XCENC =  | 1743.70933848    |                 |
| PAW double counting | =        | 52156.16731242   | -52219.07129005 |

entropy T\*S EENTRO = -0.00000000

eigenvalues EBANDS = -5815.48344211

atomic energy EATOM = 18704.32991668

Solvation Ediel\_sol = 0.00000000

-----

free energy TOTEN = -1202.76445923 eV

energy without entropy = -1202.76445923 energy(sigma->0) = -1202.76445923

-----

average (electrostatic) potential at core

the test charge radii are 0.5201 0.6991 1.0621 0.7215

(the norm of the test charge is 1.0000)

1 -40.7556 2 -40.7536 3 -40.7549 4 -40.7537 5 -40.7555

6 -40.7578 7 -40.7551 8 -40.7630 9 -40.7548 10 -40.7624

11 -40.7563 12 -40.7583 13 -40.6550 14 -40.6994 15 -40.7742

16 -40.7016 17 -40.6951 18 -40.8607 19 -40.6820 20 -40.6717

|              |              |              |              |              |
|--------------|--------------|--------------|--------------|--------------|
| 21 -40.6916  | 22 -40.6641  | 23 -40.0813  | 24 -40.1237  | 25 -57.4619  |
| 26 -57.6733  | 27 -57.6600  | 28 -57.4721  | 29 -57.6674  | 30 -57.4619  |
| 31 -57.6731  | 32 -57.6596  | 33 -57.4700  | 34 -57.6723  | 35 -57.4627  |
| 36 -57.6749  | 37 -57.6596  | 38 -57.4722  | 39 -57.6781  | 40 -57.4618  |
| 41 -57.6789  | 42 -57.6597  | 43 -57.4770  | 44 -57.6924  | 45 -57.4617  |
| 46 -57.6779  | 47 -57.6605  | 48 -57.4772  | 49 -57.6838  | 50 -57.4629  |
| 51 -57.6746  | 52 -57.6603  | 53 -57.4749  | 54 -57.6702  | 55 -57.6399  |
| 56 -57.6661  | 57 -57.6909  | 58 -57.6879  | 59 -57.6698  | 60 -57.6725  |
| 61 -57.6945  | 62 -57.6794  | 63 -57.6402  | 64 -57.6655  | 65 -57.6930  |
| 66 -57.6991  | 67 -57.6681  | 68 -57.6723  | 69 -57.6982  | 70 -57.7058  |
| 71 -57.6396  | 72 -57.6669  | 73 -57.7006  | 74 -57.7258  | 75 -57.6689  |
| 76 -57.6729  | 77 -57.7102  | 78 -57.7561  | 79 -57.6398  | 80 -57.6695  |
| 81 -57.7142  | 82 -57.7560  | 83 -57.6722  | 84 -57.6744  | 85 -57.7415  |
| 86 -57.8453  | 87 -57.6423  | 88 -57.6702  | 89 -57.7161  | 90 -57.7212  |
| 91 -57.6769  | 92 -57.6746  | 93 -57.7461  | 94 -57.7644  | 95 -57.6406  |
| 96 -57.6684  | 97 -57.6999  | 98 -57.6950  | 99 -57.6742  | 100 -57.6734 |
| 101 -57.7121 | 102 -57.6906 | 103 -57.6637 | 104 -57.6346 | 105 -57.6505 |
| 106 -57.2962 | 107 -57.3918 | 108 -57.6347 | 109 -57.6031 | 110 -57.6627 |
| 111 -57.6345 | 112 -57.6471 | 113 -57.3156 | 114 -57.3976 | 115 -57.6339 |
| 116 -57.6049 | 117 -57.6618 | 118 -57.6261 | 119 -57.7029 | 120 -57.6909 |
| 121 -57.3911 | 122 -57.6327 | 123 -57.7145 | 124 -57.6628 | 125 -57.6288 |
| 126 -57.8378 | 127 -58.3445 | 128 -57.3643 | 129 -57.6379 | 130 -58.1485 |

|              |              |              |              |              |
|--------------|--------------|--------------|--------------|--------------|
| 131 -57.6707 | 132 -57.6381 | 133 -57.8051 | 134 -57.4239 | 135 -57.3756 |
| 136 -57.6419 | 137 -58.0831 | 138 -57.6672 | 139 -57.6339 | 140 -57.6761 |
| 141 -57.3060 | 142 -57.3818 | 143 -57.6373 | 144 -57.6529 | 145 -60.8136 |
| 146 -57.3118 | 147 -81.1768 |              |              |              |

E-fermi : -2.3370      XC(G=0): -2.7343      alpha+bet : -2.2521

spin component 1

k-point 1 :      0.0000      0.0000      0.0000

| band No. | band energies | occupation |
|----------|---------------|------------|
| 1        | -26.7564      | 1.00000    |
| 2        | -21.5727      | 1.00000    |
| 3        | -21.4751      | 1.00000    |
| 4        | -21.1040      | 1.00000    |
| 5        | -21.0727      | 1.00000    |
| 6        | -21.0187      | 1.00000    |
| 7        | -20.9823      | 1.00000    |
| 8        | -20.9805      | 1.00000    |

|    |          |         |
|----|----------|---------|
| 9  | -20.8947 | 1.00000 |
| 10 | -20.5621 | 1.00000 |
| 11 | -20.5075 | 1.00000 |
| 12 | -20.4152 | 1.00000 |
| 13 | -20.4017 | 1.00000 |
| 14 | -20.1305 | 1.00000 |
| 15 | -19.9793 | 1.00000 |
| 16 | -19.7076 | 1.00000 |
| 17 | -19.6318 | 1.00000 |
| 18 | -19.6036 | 1.00000 |
| 19 | -19.5881 | 1.00000 |
| 20 | -19.5323 | 1.00000 |
| 21 | -19.5305 | 1.00000 |
| 22 | -19.5022 | 1.00000 |
| 23 | -19.4848 | 1.00000 |
| 24 | -19.1162 | 1.00000 |
| 25 | -19.0796 | 1.00000 |
| 26 | -18.9820 | 1.00000 |
| 27 | -18.9685 | 1.00000 |
| 28 | -18.9045 | 1.00000 |
| 29 | -18.7370 | 1.00000 |
| 30 | -18.5088 | 1.00000 |

|    |          |         |
|----|----------|---------|
| 31 | -18.3632 | 1.00000 |
| 32 | -18.2789 | 1.00000 |
| 33 | -18.2558 | 1.00000 |
| 34 | -18.1878 | 1.00000 |
| 35 | -18.1857 | 1.00000 |
| 36 | -18.0834 | 1.00000 |
| 37 | -18.0797 | 1.00000 |
| 38 | -17.5653 | 1.00000 |
| 39 | -17.3170 | 1.00000 |
| 40 | -17.2919 | 1.00000 |
| 41 | -17.2867 | 1.00000 |
| 42 | -17.2136 | 1.00000 |
| 43 | -17.2071 | 1.00000 |
| 44 | -17.1809 | 1.00000 |
| 45 | -17.0268 | 1.00000 |
| 46 | -16.9543 | 1.00000 |
| 47 | -16.9366 | 1.00000 |
| 48 | -16.8969 | 1.00000 |
| 49 | -16.8950 | 1.00000 |
| 50 | -16.8537 | 1.00000 |
| 51 | -16.8454 | 1.00000 |
| 52 | -16.8256 | 1.00000 |

|    |          |         |
|----|----------|---------|
| 53 | -16.8229 | 1.00000 |
| 54 | -16.7330 | 1.00000 |
| 55 | -16.7299 | 1.00000 |
| 56 | -16.1816 | 1.00000 |
| 57 | -15.7333 | 1.00000 |
| 58 | -15.6959 | 1.00000 |
| 59 | -15.6642 | 1.00000 |
| 60 | -15.6415 | 1.00000 |
| 61 | -15.6197 | 1.00000 |
| 62 | -15.5573 | 1.00000 |
| 63 | -15.5533 | 1.00000 |
| 64 | -15.1787 | 1.00000 |
| 65 | -14.8126 | 1.00000 |
| 66 | -14.6127 | 1.00000 |
| 67 | -14.5815 | 1.00000 |
| 68 | -14.5384 | 1.00000 |
| 69 | -14.5019 | 1.00000 |
| 70 | -14.4722 | 1.00000 |
| 71 | -14.4467 | 1.00000 |
| 72 | -14.3381 | 1.00000 |
| 73 | -14.3094 | 1.00000 |
| 74 | -14.2834 | 1.00000 |

|    |          |         |
|----|----------|---------|
| 75 | -14.2760 | 1.00000 |
| 76 | -14.1859 | 1.00000 |
| 77 | -14.1821 | 1.00000 |
| 78 | -13.8927 | 1.00000 |
| 79 | -13.7642 | 1.00000 |
| 80 | -13.5976 | 1.00000 |
| 81 | -13.5521 | 1.00000 |
| 82 | -13.5331 | 1.00000 |
| 83 | -13.5021 | 1.00000 |
| 84 | -13.4497 | 1.00000 |
| 85 | -13.3676 | 1.00000 |
| 86 | -13.3490 | 1.00000 |
| 87 | -13.1936 | 1.00000 |
| 88 | -12.7903 | 1.00000 |
| 89 | -12.7632 | 1.00000 |
| 90 | -12.7311 | 1.00000 |
| 91 | -12.6997 | 1.00000 |
| 92 | -12.6899 | 1.00000 |
| 93 | -12.6283 | 1.00000 |
| 94 | -12.4646 | 1.00000 |
| 95 | -12.4497 | 1.00000 |
| 96 | -12.3859 | 1.00000 |

|     |          |         |
|-----|----------|---------|
| 97  | -12.3270 | 1.00000 |
| 98  | -12.2164 | 1.00000 |
| 99  | -12.2068 | 1.00000 |
| 100 | -12.1685 | 1.00000 |
| 101 | -11.9485 | 1.00000 |
| 102 | -11.6871 | 1.00000 |
| 103 | -11.6295 | 1.00000 |
| 104 | -11.6143 | 1.00000 |
| 105 | -11.5722 | 1.00000 |
| 106 | -11.0892 | 1.00000 |
| 107 | -11.0465 | 1.00000 |
| 108 | -10.9008 | 1.00000 |
| 109 | -10.8906 | 1.00000 |
| 110 | -10.8329 | 1.00000 |
| 111 | -10.7142 | 1.00000 |
| 112 | -10.6785 | 1.00000 |
| 113 | -10.6635 | 1.00000 |
| 114 | -10.6504 | 1.00000 |
| 115 | -10.5928 | 1.00000 |
| 116 | -10.5842 | 1.00000 |
| 117 | -10.5758 | 1.00000 |
| 118 | -10.5719 | 1.00000 |

|     |          |         |
|-----|----------|---------|
| 119 | -10.5296 | 1.00000 |
| 120 | -10.5288 | 1.00000 |
| 121 | -10.5140 | 1.00000 |
| 122 | -10.5062 | 1.00000 |
| 123 | -10.3821 | 1.00000 |
| 124 | -10.2927 | 1.00000 |
| 125 | -10.2589 | 1.00000 |
| 126 | -10.1909 | 1.00000 |
| 127 | -10.1898 | 1.00000 |
| 128 | -10.0257 | 1.00000 |
| 129 | -9.9713  | 1.00000 |
| 130 | -9.8880  | 1.00000 |
| 131 | -9.8572  | 1.00000 |
| 132 | -9.7949  | 1.00000 |
| 133 | -9.7894  | 1.00000 |
| 134 | -9.7435  | 1.00000 |
| 135 | -9.6744  | 1.00000 |
| 136 | -9.4473  | 1.00000 |
| 137 | -9.4267  | 1.00000 |
| 138 | -9.3979  | 1.00000 |
| 139 | -9.3911  | 1.00000 |
| 140 | -9.3811  | 1.00000 |

|     |         |         |
|-----|---------|---------|
| 141 | -9.3720 | 1.00000 |
| 142 | -9.3138 | 1.00000 |
| 143 | -9.3065 | 1.00000 |
| 144 | -9.2926 | 1.00000 |
| 145 | -9.2833 | 1.00000 |
| 146 | -9.2697 | 1.00000 |
| 147 | -9.0938 | 1.00000 |
| 148 | -9.0065 | 1.00000 |
| 149 | -8.9788 | 1.00000 |
| 150 | -8.9605 | 1.00000 |
| 151 | -8.9464 | 1.00000 |
| 152 | -8.7955 | 1.00000 |
| 153 | -8.7489 | 1.00000 |
| 154 | -8.7381 | 1.00000 |
| 155 | -8.7212 | 1.00000 |
| 156 | -8.7117 | 1.00000 |
| 157 | -8.6907 | 1.00000 |
| 158 | -8.6800 | 1.00000 |
| 159 | -8.6723 | 1.00000 |
| 160 | -8.6566 | 1.00000 |
| 161 | -8.5970 | 1.00000 |
| 162 | -8.5862 | 1.00000 |

|     |         |         |
|-----|---------|---------|
| 163 | -8.5793 | 1.00000 |
| 164 | -8.5708 | 1.00000 |
| 165 | -8.4918 | 1.00000 |
| 166 | -8.4605 | 1.00000 |
| 167 | -8.4393 | 1.00000 |
| 168 | -8.3492 | 1.00000 |
| 169 | -8.3007 | 1.00000 |
| 170 | -8.2771 | 1.00000 |
| 171 | -8.2668 | 1.00000 |
| 172 | -8.2366 | 1.00000 |
| 173 | -8.2354 | 1.00000 |
| 174 | -8.1547 | 1.00000 |
| 175 | -8.1483 | 1.00000 |
| 176 | -8.0798 | 1.00000 |
| 177 | -8.0475 | 1.00000 |
| 178 | -8.0294 | 1.00000 |
| 179 | -8.0244 | 1.00000 |
| 180 | -7.9763 | 1.00000 |
| 181 | -7.9679 | 1.00000 |
| 182 | -7.9276 | 1.00000 |
| 183 | -7.9039 | 1.00000 |
| 184 | -7.8881 | 1.00000 |

|     |         |         |
|-----|---------|---------|
| 185 | -7.8758 | 1.00000 |
| 186 | -7.8038 | 1.00000 |
| 187 | -7.8005 | 1.00000 |
| 188 | -7.7501 | 1.00000 |
| 189 | -7.7136 | 1.00000 |
| 190 | -7.6692 | 1.00000 |
| 191 | -7.6035 | 1.00000 |
| 192 | -7.5883 | 1.00000 |
| 193 | -7.5788 | 1.00000 |
| 194 | -7.5509 | 1.00000 |
| 195 | -7.4838 | 1.00000 |
| 196 | -7.4833 | 1.00000 |
| 197 | -7.4319 | 1.00000 |
| 198 | -7.3282 | 1.00000 |
| 199 | -7.2526 | 1.00000 |
| 200 | -7.1523 | 1.00000 |
| 201 | -7.0687 | 1.00000 |
| 202 | -7.0444 | 1.00000 |
| 203 | -7.0317 | 1.00000 |
| 204 | -7.0169 | 1.00000 |
| 205 | -7.0001 | 1.00000 |
| 206 | -6.9933 | 1.00000 |

|     |         |         |
|-----|---------|---------|
| 207 | -6.9787 | 1.00000 |
| 208 | -6.8691 | 1.00000 |
| 209 | -6.8238 | 1.00000 |
| 210 | -6.8047 | 1.00000 |
| 211 | -6.7962 | 1.00000 |
| 212 | -6.7353 | 1.00000 |
| 213 | -6.6889 | 1.00000 |
| 214 | -6.4748 | 1.00000 |
| 215 | -6.4282 | 1.00000 |
| 216 | -6.3993 | 1.00000 |
| 217 | -6.3944 | 1.00000 |
| 218 | -6.3777 | 1.00000 |
| 219 | -6.3761 | 1.00000 |
| 220 | -6.3208 | 1.00000 |
| 221 | -6.3107 | 1.00000 |
| 222 | -6.2400 | 1.00000 |
| 223 | -6.2329 | 1.00000 |
| 224 | -6.2324 | 1.00000 |
| 225 | -6.0811 | 1.00000 |
| 226 | -6.0410 | 1.00000 |
| 227 | -5.7958 | 1.00000 |
| 228 | -5.7556 | 1.00000 |

|     |         |         |
|-----|---------|---------|
| 229 | -5.6980 | 1.00000 |
| 230 | -5.6444 | 1.00000 |
| 231 | -5.6406 | 1.00000 |
| 232 | -5.5624 | 1.00000 |
| 233 | -5.5336 | 1.00000 |
| 234 | -5.4713 | 1.00000 |
| 235 | -5.4429 | 1.00000 |
| 236 | -5.1673 | 1.00000 |
| 237 | -5.0622 | 1.00000 |
| 238 | -5.0540 | 1.00000 |
| 239 | -5.0219 | 1.00000 |
| 240 | -4.9928 | 1.00000 |
| 241 | -4.9139 | 1.00000 |
| 242 | -4.8571 | 1.00000 |
| 243 | -4.8262 | 1.00000 |
| 244 | -4.7938 | 1.00000 |
| 245 | -4.6827 | 1.00000 |
| 246 | -4.5762 | 1.00000 |
| 247 | -4.5749 | 1.00000 |
| 248 | -4.5096 | 1.00000 |
| 249 | -4.4490 | 1.00000 |
| 250 | -4.3876 | 1.00000 |

|     |         |         |
|-----|---------|---------|
| 251 | -4.2961 | 1.00000 |
| 252 | -4.2698 | 1.00000 |
| 253 | -4.2163 | 1.00000 |
| 254 | -3.5674 | 1.00000 |
| 255 | -3.3582 | 1.00000 |
| 256 | -3.2066 | 1.00000 |
| 257 | -2.9423 | 1.00000 |
| 258 | -2.8521 | 1.00000 |
| 259 | -2.8274 | 1.00000 |
| 260 | -2.6119 | 1.00000 |
| 261 | -1.9116 | 0.00000 |
| 262 | -1.7727 | 0.00000 |
| 263 | -1.7232 | 0.00000 |
| 264 | -1.3555 | 0.00000 |
| 265 | -1.3381 | 0.00000 |
| 266 | -1.2061 | 0.00000 |
| 267 | -0.7575 | 0.00000 |
| 268 | -0.5884 | 0.00000 |
| 269 | -0.5075 | 0.00000 |
| 270 | -0.3114 | 0.00000 |
| 271 | -0.3093 | 0.00000 |
| 272 | -0.2937 | 0.00000 |

|     |         |         |
|-----|---------|---------|
| 273 | -0.1875 | 0.00000 |
| 274 | -0.0625 | 0.00000 |
| 275 | -0.0540 | 0.00000 |
| 276 | -0.0147 | 0.00000 |
| 277 | 0.0314  | 0.00000 |
| 278 | 0.0797  | 0.00000 |
| 279 | 0.1696  | 0.00000 |
| 280 | 0.2167  | 0.00000 |
| 281 | 0.2444  | 0.00000 |
| 282 | 0.4149  | 0.00000 |
| 283 | 0.4437  | 0.00000 |
| 284 | 0.4784  | 0.00000 |
| 285 | 0.5987  | 0.00000 |
| 286 | 0.6660  | 0.00000 |
| 287 | 0.8185  | 0.00000 |
| 288 | 0.8748  | 0.00000 |
| 289 | 1.0456  | 0.00000 |
| 290 | 1.0838  | 0.00000 |
| 291 | 1.1172  | 0.00000 |
| 292 | 1.1609  | 0.00000 |
| 293 | 1.2220  | 0.00000 |
| 294 | 1.2434  | 0.00000 |

|     |        |         |
|-----|--------|---------|
| 295 | 1.2859 | 0.00000 |
| 296 | 1.3135 | 0.00000 |
| 297 | 1.3446 | 0.00000 |
| 298 | 1.4096 | 0.00000 |
| 299 | 1.4650 | 0.00000 |
| 300 | 1.4826 | 0.00000 |
| 301 | 1.5502 | 0.00000 |
| 302 | 1.5860 | 0.00000 |
| 303 | 1.6190 | 0.00000 |
| 304 | 1.6766 | 0.00000 |
| 305 | 1.7493 | 0.00000 |
| 306 | 1.7614 | 0.00000 |
| 307 | 1.8736 | 0.00000 |
| 308 | 1.8934 | 0.00000 |
| 309 | 1.9023 | 0.00000 |
| 310 | 1.9117 | 0.00000 |
| 311 | 2.1217 | 0.00000 |
| 312 | 2.1883 | 0.00000 |
| 313 | 2.2068 | 0.00000 |
| 314 | 2.2323 | 0.00000 |
| 315 | 2.2740 | 0.00000 |
| 316 | 2.2910 | 0.00000 |

|     |        |         |
|-----|--------|---------|
| 317 | 2.3310 | 0.00000 |
| 318 | 2.3514 | 0.00000 |
| 319 | 2.3700 | 0.00000 |
| 320 | 2.3958 | 0.00000 |
| 321 | 2.4168 | 0.00000 |
| 322 | 2.4287 | 0.00000 |
| 323 | 2.4385 | 0.00000 |
| 324 | 2.4529 | 0.00000 |
| 325 | 2.4612 | 0.00000 |
| 326 | 2.5257 | 0.00000 |
| 327 | 2.5402 | 0.00000 |
| 328 | 2.7010 | 0.00000 |
| 329 | 2.7287 | 0.00000 |
| 330 | 2.7517 | 0.00000 |
| 331 | 2.7552 | 0.00000 |
| 332 | 2.7646 | 0.00000 |
| 333 | 2.8116 | 0.00000 |
| 334 | 2.8319 | 0.00000 |
| 335 | 2.8562 | 0.00000 |
| 336 | 2.8907 | 0.00000 |
| 337 | 2.9236 | 0.00000 |
| 338 | 2.9456 | 0.00000 |

|     |        |         |
|-----|--------|---------|
| 339 | 2.9778 | 0.00000 |
| 340 | 3.0042 | 0.00000 |
| 341 | 3.0334 | 0.00000 |
| 342 | 3.0427 | 0.00000 |
| 343 | 3.0658 | 0.00000 |
| 344 | 3.0837 | 0.00000 |
| 345 | 3.1510 | 0.00000 |
| 346 | 3.1618 | 0.00000 |
| 347 | 3.1792 | 0.00000 |
| 348 | 3.1912 | 0.00000 |
| 349 | 3.3016 | 0.00000 |
| 350 | 3.3240 | 0.00000 |
| 351 | 3.3527 | 0.00000 |
| 352 | 3.3680 | 0.00000 |
| 353 | 3.3898 | 0.00000 |
| 354 | 3.4335 | 0.00000 |
| 355 | 3.4770 | 0.00000 |
| 356 | 3.4809 | 0.00000 |
| 357 | 3.4851 | 0.00000 |
| 358 | 3.4957 | 0.00000 |
| 359 | 3.6349 | 0.00000 |
| 360 | 3.6726 | 0.00000 |

|     |        |         |
|-----|--------|---------|
| 361 | 3.6880 | 0.00000 |
| 362 | 3.7311 | 0.00000 |
| 363 | 3.7489 | 0.00000 |
| 364 | 3.7573 | 0.00000 |
| 365 | 3.7721 | 0.00000 |
| 366 | 3.7927 | 0.00000 |
| 367 | 3.8104 | 0.00000 |
| 368 | 3.8313 | 0.00000 |
| 369 | 3.8364 | 0.00000 |
| 370 | 3.8503 | 0.00000 |
| 371 | 3.8752 | 0.00000 |
| 372 | 3.8821 | 0.00000 |
| 373 | 3.9090 | 0.00000 |
| 374 | 3.9217 | 0.00000 |
| 375 | 3.9326 | 0.00000 |
| 376 | 3.9568 | 0.00000 |
| 377 | 3.9717 | 0.00000 |
| 378 | 3.9846 | 0.00000 |
| 379 | 4.0157 | 0.00000 |
| 380 | 4.0684 | 0.00000 |
| 381 | 4.1644 | 0.00000 |
| 382 | 4.2454 | 0.00000 |

|     |        |         |
|-----|--------|---------|
| 383 | 4.2570 | 0.00000 |
| 384 | 4.2586 | 0.00000 |
| 385 | 4.2850 | 0.00000 |
| 386 | 4.3129 | 0.00000 |
| 387 | 4.3277 | 0.00000 |
| 388 | 4.3407 | 0.00000 |
| 389 | 4.3700 | 0.00000 |
| 390 | 4.3797 | 0.00000 |
| 391 | 4.4175 | 0.00000 |
| 392 | 4.4444 | 0.00000 |
| 393 | 4.4697 | 0.00000 |
| 394 | 4.4800 | 0.00000 |
| 395 | 4.4835 | 0.00000 |
| 396 | 4.4962 | 0.00000 |
| 397 | 4.5177 | 0.00000 |
| 398 | 4.5495 | 0.00000 |
| 399 | 4.5883 | 0.00000 |
| 400 | 4.6076 | 0.00000 |
| 401 | 4.6262 | 0.00000 |
| 402 | 4.6419 | 0.00000 |
| 403 | 4.6560 | 0.00000 |
| 404 | 4.6787 | 0.00000 |

|     |        |         |
|-----|--------|---------|
| 405 | 4.7034 | 0.00000 |
| 406 | 4.7306 | 0.00000 |
| 407 | 4.7460 | 0.00000 |
| 408 | 4.7670 | 0.00000 |
| 409 | 4.7812 | 0.00000 |
| 410 | 4.7829 | 0.00000 |
| 411 | 4.7965 | 0.00000 |
| 412 | 4.8274 | 0.00000 |
| 413 | 4.8602 | 0.00000 |
| 414 | 4.8702 | 0.00000 |
| 415 | 4.8964 | 0.00000 |
| 416 | 4.9310 | 0.00000 |
| 417 | 4.9831 | 0.00000 |
| 418 | 5.0038 | 0.00000 |
| 419 | 5.0102 | 0.00000 |
| 420 | 5.0344 | 0.00000 |
| 421 | 5.0386 | 0.00000 |
| 422 | 5.0629 | 0.00000 |
| 423 | 5.0813 | 0.00000 |
| 424 | 5.1143 | 0.00000 |
| 425 | 5.1169 | 0.00000 |
| 426 | 5.1365 | 0.00000 |

|     |        |         |
|-----|--------|---------|
| 427 | 5.1404 | 0.00000 |
| 428 | 5.1517 | 0.00000 |
| 429 | 5.1745 | 0.00000 |
| 430 | 5.1844 | 0.00000 |
| 431 | 5.1877 | 0.00000 |
| 432 | 5.2168 | 0.00000 |
| 433 | 5.2335 | 0.00000 |
| 434 | 5.2415 | 0.00000 |
| 435 | 5.2557 | 0.00000 |
| 436 | 5.2877 | 0.00000 |
| 437 | 5.2940 | 0.00000 |
| 438 | 5.3078 | 0.00000 |
| 439 | 5.3315 | 0.00000 |
| 440 | 5.3481 | 0.00000 |
| 441 | 5.3659 | 0.00000 |
| 442 | 5.3714 | 0.00000 |
| 443 | 5.3904 | 0.00000 |
| 444 | 5.4196 | 0.00000 |
| 445 | 5.4527 | 0.00000 |
| 446 | 5.4617 | 0.00000 |
| 447 | 5.4807 | 0.00000 |
| 448 | 5.4942 | 0.00000 |

|     |        |         |
|-----|--------|---------|
| 449 | 5.5160 | 0.00000 |
| 450 | 5.5480 | 0.00000 |
| 451 | 5.5658 | 0.00000 |
| 452 | 5.5743 | 0.00000 |
| 453 | 5.5949 | 0.00000 |
| 454 | 5.6128 | 0.00000 |
| 455 | 5.6553 | 0.00000 |
| 456 | 5.6802 | 0.00000 |
| 457 | 5.7078 | 0.00000 |
| 458 | 5.7222 | 0.00000 |
| 459 | 5.7440 | 0.00000 |
| 460 | 5.7573 | 0.00000 |
| 461 | 5.7807 | 0.00000 |
| 462 | 5.7875 | 0.00000 |
| 463 | 5.7937 | 0.00000 |
| 464 | 5.7993 | 0.00000 |
| 465 | 5.8069 | 0.00000 |
| 466 | 5.8227 | 0.00000 |
| 467 | 5.8412 | 0.00000 |
| 468 | 5.8537 | 0.00000 |
| 469 | 5.8714 | 0.00000 |
| 470 | 5.8785 | 0.00000 |

|     |        |         |
|-----|--------|---------|
| 471 | 5.8839 | 0.00000 |
| 472 | 5.9063 | 0.00000 |
| 473 | 5.9123 | 0.00000 |
| 474 | 5.9370 | 0.00000 |
| 475 | 5.9474 | 0.00000 |
| 476 | 5.9669 | 0.00000 |
| 477 | 5.9725 | 0.00000 |
| 478 | 5.9939 | 0.00000 |
| 479 | 6.0047 | 0.00000 |
| 480 | 6.0576 | 0.00000 |

spin component 2

k-point 1 : 0.0000 0.0000 0.0000

| band No. | band energies | occupation |
|----------|---------------|------------|
| 1        | -26.7495      | 1.00000    |
| 2        | -21.5715      | 1.00000    |
| 3        | -21.4736      | 1.00000    |
| 4        | -21.1021      | 1.00000    |
| 5        | -21.0719      | 1.00000    |
| 6        | -21.0160      | 1.00000    |
| 7        | -20.9809      | 1.00000    |

|    |          |         |
|----|----------|---------|
| 8  | -20.9786 | 1.00000 |
| 9  | -20.8841 | 1.00000 |
| 10 | -20.5592 | 1.00000 |
| 11 | -20.5041 | 1.00000 |
| 12 | -20.4041 | 1.00000 |
| 13 | -20.3921 | 1.00000 |
| 14 | -20.1264 | 1.00000 |
| 15 | -19.9562 | 1.00000 |
| 16 | -19.7049 | 1.00000 |
| 17 | -19.6305 | 1.00000 |
| 18 | -19.6015 | 1.00000 |
| 19 | -19.5817 | 1.00000 |
| 20 | -19.5310 | 1.00000 |
| 21 | -19.5288 | 1.00000 |
| 22 | -19.4795 | 1.00000 |
| 23 | -19.4653 | 1.00000 |
| 24 | -19.1138 | 1.00000 |
| 25 | -19.0772 | 1.00000 |
| 26 | -18.9721 | 1.00000 |
| 27 | -18.9589 | 1.00000 |
| 28 | -18.8998 | 1.00000 |
| 29 | -18.7074 | 1.00000 |

|    |          |         |
|----|----------|---------|
| 30 | -18.5058 | 1.00000 |
| 31 | -18.3563 | 1.00000 |
| 32 | -18.2507 | 1.00000 |
| 33 | -18.2306 | 1.00000 |
| 34 | -18.1826 | 1.00000 |
| 35 | -18.1804 | 1.00000 |
| 36 | -18.0633 | 1.00000 |
| 37 | -18.0600 | 1.00000 |
| 38 | -17.5619 | 1.00000 |
| 39 | -17.3010 | 1.00000 |
| 40 | -17.2914 | 1.00000 |
| 41 | -17.2771 | 1.00000 |
| 42 | -17.2113 | 1.00000 |
| 43 | -17.2102 | 1.00000 |
| 44 | -17.1779 | 1.00000 |
| 45 | -17.0229 | 1.00000 |
| 46 | -16.9456 | 1.00000 |
| 47 | -16.9264 | 1.00000 |
| 48 | -16.8742 | 1.00000 |
| 49 | -16.8732 | 1.00000 |
| 50 | -16.8329 | 1.00000 |
| 51 | -16.8269 | 1.00000 |

|    |          |         |
|----|----------|---------|
| 52 | -16.8219 | 1.00000 |
| 53 | -16.8192 | 1.00000 |
| 54 | -16.7348 | 1.00000 |
| 55 | -16.7286 | 1.00000 |
| 56 | -16.1790 | 1.00000 |
| 57 | -15.7325 | 1.00000 |
| 58 | -15.6615 | 1.00000 |
| 59 | -15.6480 | 1.00000 |
| 60 | -15.6245 | 1.00000 |
| 61 | -15.5702 | 1.00000 |
| 62 | -15.5314 | 1.00000 |
| 63 | -15.5286 | 1.00000 |
| 64 | -15.1749 | 1.00000 |
| 65 | -14.8104 | 1.00000 |
| 66 | -14.6105 | 1.00000 |
| 67 | -14.5640 | 1.00000 |
| 68 | -14.5039 | 1.00000 |
| 69 | -14.5021 | 1.00000 |
| 70 | -14.4683 | 1.00000 |
| 71 | -14.4423 | 1.00000 |
| 72 | -14.3347 | 1.00000 |
| 73 | -14.3019 | 1.00000 |

|    |          |         |
|----|----------|---------|
| 74 | -14.2716 | 1.00000 |
| 75 | -14.2676 | 1.00000 |
| 76 | -14.1678 | 1.00000 |
| 77 | -14.1645 | 1.00000 |
| 78 | -13.8918 | 1.00000 |
| 79 | -13.7618 | 1.00000 |
| 80 | -13.5950 | 1.00000 |
| 81 | -13.5416 | 1.00000 |
| 82 | -13.5219 | 1.00000 |
| 83 | -13.4984 | 1.00000 |
| 84 | -13.4480 | 1.00000 |
| 85 | -13.3471 | 1.00000 |
| 86 | -13.3445 | 1.00000 |
| 87 | -13.1920 | 1.00000 |
| 88 | -12.7841 | 1.00000 |
| 89 | -12.7536 | 1.00000 |
| 90 | -12.7223 | 1.00000 |
| 91 | -12.6811 | 1.00000 |
| 92 | -12.6742 | 1.00000 |
| 93 | -12.6260 | 1.00000 |
| 94 | -12.4521 | 1.00000 |
| 95 | -12.4348 | 1.00000 |

|     |          |         |
|-----|----------|---------|
| 96  | -12.3823 | 1.00000 |
| 97  | -12.3261 | 1.00000 |
| 98  | -12.2118 | 1.00000 |
| 99  | -12.2016 | 1.00000 |
| 100 | -12.1670 | 1.00000 |
| 101 | -11.9458 | 1.00000 |
| 102 | -11.6841 | 1.00000 |
| 103 | -11.6117 | 1.00000 |
| 104 | -11.5952 | 1.00000 |
| 105 | -11.5665 | 1.00000 |
| 106 | -11.0874 | 1.00000 |
| 107 | -11.0433 | 1.00000 |
| 108 | -10.8915 | 1.00000 |
| 109 | -10.8801 | 1.00000 |
| 110 | -10.8301 | 1.00000 |
| 111 | -10.7083 | 1.00000 |
| 112 | -10.6772 | 1.00000 |
| 113 | -10.6607 | 1.00000 |
| 114 | -10.6454 | 1.00000 |
| 115 | -10.5848 | 1.00000 |
| 116 | -10.5775 | 1.00000 |
| 117 | -10.5728 | 1.00000 |

|     |          |         |
|-----|----------|---------|
| 118 | -10.5690 | 1.00000 |
| 119 | -10.5190 | 1.00000 |
| 120 | -10.5182 | 1.00000 |
| 121 | -10.5049 | 1.00000 |
| 122 | -10.5002 | 1.00000 |
| 123 | -10.3813 | 1.00000 |
| 124 | -10.2919 | 1.00000 |
| 125 | -10.2582 | 1.00000 |
| 126 | -10.1874 | 1.00000 |
| 127 | -10.1864 | 1.00000 |
| 128 | -10.0220 | 1.00000 |
| 129 | -9.9611  | 1.00000 |
| 130 | -9.8854  | 1.00000 |
| 131 | -9.8525  | 1.00000 |
| 132 | -9.7861  | 1.00000 |
| 133 | -9.7803  | 1.00000 |
| 134 | -9.7418  | 1.00000 |
| 135 | -9.6707  | 1.00000 |
| 136 | -9.4453  | 1.00000 |
| 137 | -9.4233  | 1.00000 |
| 138 | -9.3874  | 1.00000 |
| 139 | -9.3820  | 1.00000 |

|     |         |         |
|-----|---------|---------|
| 140 | -9.3727 | 1.00000 |
| 141 | -9.3626 | 1.00000 |
| 142 | -9.3114 | 1.00000 |
| 143 | -9.3043 | 1.00000 |
| 144 | -9.2916 | 1.00000 |
| 145 | -9.2799 | 1.00000 |
| 146 | -9.2494 | 1.00000 |
| 147 | -9.0926 | 1.00000 |
| 148 | -9.0029 | 1.00000 |
| 149 | -8.9678 | 1.00000 |
| 150 | -8.9463 | 1.00000 |
| 151 | -8.9392 | 1.00000 |
| 152 | -8.7930 | 1.00000 |
| 153 | -8.7411 | 1.00000 |
| 154 | -8.7356 | 1.00000 |
| 155 | -8.7156 | 1.00000 |
| 156 | -8.7081 | 1.00000 |
| 157 | -8.6736 | 1.00000 |
| 158 | -8.6673 | 1.00000 |
| 159 | -8.6590 | 1.00000 |
| 160 | -8.6558 | 1.00000 |
| 161 | -8.5796 | 1.00000 |

|     |         |         |
|-----|---------|---------|
| 162 | -8.5741 | 1.00000 |
| 163 | -8.5692 | 1.00000 |
| 164 | -8.5525 | 1.00000 |
| 165 | -8.4914 | 1.00000 |
| 166 | -8.4599 | 1.00000 |
| 167 | -8.4377 | 1.00000 |
| 168 | -8.3465 | 1.00000 |
| 169 | -8.2978 | 1.00000 |
| 170 | -8.2754 | 1.00000 |
| 171 | -8.2362 | 1.00000 |
| 172 | -8.2328 | 1.00000 |
| 173 | -8.2306 | 1.00000 |
| 174 | -8.1446 | 1.00000 |
| 175 | -8.1371 | 1.00000 |
| 176 | -8.0766 | 1.00000 |
| 177 | -8.0454 | 1.00000 |
| 178 | -8.0168 | 1.00000 |
| 179 | -8.0093 | 1.00000 |
| 180 | -7.9718 | 1.00000 |
| 181 | -7.9629 | 1.00000 |
| 182 | -7.9235 | 1.00000 |
| 183 | -7.8943 | 1.00000 |

|     |         |         |
|-----|---------|---------|
| 184 | -7.8743 | 1.00000 |
| 185 | -7.8669 | 1.00000 |
| 186 | -7.7950 | 1.00000 |
| 187 | -7.7912 | 1.00000 |
| 188 | -7.7407 | 1.00000 |
| 189 | -7.6823 | 1.00000 |
| 190 | -7.6390 | 1.00000 |
| 191 | -7.6012 | 1.00000 |
| 192 | -7.5804 | 1.00000 |
| 193 | -7.5581 | 1.00000 |
| 194 | -7.5430 | 1.00000 |
| 195 | -7.4758 | 1.00000 |
| 196 | -7.4756 | 1.00000 |
| 197 | -7.4308 | 1.00000 |
| 198 | -7.3273 | 1.00000 |
| 199 | -7.2393 | 1.00000 |
| 200 | -7.1488 | 1.00000 |
| 201 | -7.0591 | 1.00000 |
| 202 | -7.0393 | 1.00000 |
| 203 | -7.0182 | 1.00000 |
| 204 | -6.9886 | 1.00000 |
| 205 | -6.9811 | 1.00000 |

|     |         |         |
|-----|---------|---------|
| 206 | -6.9759 | 1.00000 |
| 207 | -6.9443 | 1.00000 |
| 208 | -6.8654 | 1.00000 |
| 209 | -6.8196 | 1.00000 |
| 210 | -6.7985 | 1.00000 |
| 211 | -6.7911 | 1.00000 |
| 212 | -6.7285 | 1.00000 |
| 213 | -6.6796 | 1.00000 |
| 214 | -6.4716 | 1.00000 |
| 215 | -6.3984 | 1.00000 |
| 216 | -6.3863 | 1.00000 |
| 217 | -6.3817 | 1.00000 |
| 218 | -6.3668 | 1.00000 |
| 219 | -6.3421 | 1.00000 |
| 220 | -6.3069 | 1.00000 |
| 221 | -6.2793 | 1.00000 |
| 222 | -6.2327 | 1.00000 |
| 223 | -6.2313 | 1.00000 |
| 224 | -6.2257 | 1.00000 |
| 225 | -6.0504 | 1.00000 |
| 226 | -6.0125 | 1.00000 |
| 227 | -5.7594 | 1.00000 |

|     |         |         |
|-----|---------|---------|
| 228 | -5.7149 | 1.00000 |
| 229 | -5.6963 | 1.00000 |
| 230 | -5.6390 | 1.00000 |
| 231 | -5.6263 | 1.00000 |
| 232 | -5.5474 | 1.00000 |
| 233 | -5.5266 | 1.00000 |
| 234 | -5.4448 | 1.00000 |
| 235 | -5.4154 | 1.00000 |
| 236 | -5.1450 | 1.00000 |
| 237 | -5.0636 | 1.00000 |
| 238 | -5.0298 | 1.00000 |
| 239 | -5.0261 | 1.00000 |
| 240 | -4.9633 | 1.00000 |
| 241 | -4.8811 | 1.00000 |
| 242 | -4.8579 | 1.00000 |
| 243 | -4.8068 | 1.00000 |
| 244 | -4.7816 | 1.00000 |
| 245 | -4.6525 | 1.00000 |
| 246 | -4.5824 | 1.00000 |
| 247 | -4.5793 | 1.00000 |
| 248 | -4.4796 | 1.00000 |
| 249 | -4.4248 | 1.00000 |

|     |         |         |
|-----|---------|---------|
| 250 | -4.3987 | 1.00000 |
| 251 | -4.2999 | 1.00000 |
| 252 | -4.2310 | 1.00000 |
| 253 | -4.1788 | 1.00000 |
| 254 | -3.5413 | 1.00000 |
| 255 | -3.3129 | 1.00000 |
| 256 | -3.1474 | 1.00000 |
| 257 | -2.9473 | 1.00000 |
| 258 | -2.8030 | 1.00000 |
| 259 | -2.7443 | 1.00000 |
| 260 | -2.0654 | 0.00000 |
| 261 | -1.9176 | 0.00000 |
| 262 | -1.7274 | 0.00000 |
| 263 | -1.6836 | 0.00000 |
| 264 | -1.3306 | 0.00000 |
| 265 | -1.2890 | 0.00000 |
| 266 | -1.1675 | 0.00000 |
| 267 | -0.7359 | 0.00000 |
| 268 | -0.5878 | 0.00000 |
| 269 | -0.5150 | 0.00000 |
| 270 | -0.2843 | 0.00000 |
| 271 | -0.2813 | 0.00000 |

|     |         |         |
|-----|---------|---------|
| 272 | -0.2636 | 0.00000 |
| 273 | -0.1608 | 0.00000 |
| 274 | -0.0621 | 0.00000 |
| 275 | -0.0522 | 0.00000 |
| 276 | 0.0085  | 0.00000 |
| 277 | 0.0362  | 0.00000 |
| 278 | 0.0746  | 0.00000 |
| 279 | 0.2048  | 0.00000 |
| 280 | 0.2518  | 0.00000 |
| 281 | 0.2761  | 0.00000 |
| 282 | 0.4297  | 0.00000 |
| 283 | 0.4469  | 0.00000 |
| 284 | 0.4796  | 0.00000 |
| 285 | 0.6034  | 0.00000 |
| 286 | 0.6865  | 0.00000 |
| 287 | 0.8213  | 0.00000 |
| 288 | 0.8817  | 0.00000 |
| 289 | 1.0550  | 0.00000 |
| 290 | 1.1024  | 0.00000 |
| 291 | 1.1384  | 0.00000 |
| 292 | 1.1754  | 0.00000 |
| 293 | 1.2308  | 0.00000 |

|     |        |         |
|-----|--------|---------|
| 294 | 1.2496 | 0.00000 |
| 295 | 1.3071 | 0.00000 |
| 296 | 1.3189 | 0.00000 |
| 297 | 1.3584 | 0.00000 |
| 298 | 1.4288 | 0.00000 |
| 299 | 1.4791 | 0.00000 |
| 300 | 1.4981 | 0.00000 |
| 301 | 1.5752 | 0.00000 |
| 302 | 1.6017 | 0.00000 |
| 303 | 1.6477 | 0.00000 |
| 304 | 1.6854 | 0.00000 |
| 305 | 1.7568 | 0.00000 |
| 306 | 1.7714 | 0.00000 |
| 307 | 1.8782 | 0.00000 |
| 308 | 1.8985 | 0.00000 |
| 309 | 1.9054 | 0.00000 |
| 310 | 1.9192 | 0.00000 |
| 311 | 2.1381 | 0.00000 |
| 312 | 2.1992 | 0.00000 |
| 313 | 2.2188 | 0.00000 |
| 314 | 2.2507 | 0.00000 |
| 315 | 2.2881 | 0.00000 |

|     |        |         |
|-----|--------|---------|
| 316 | 2.2955 | 0.00000 |
| 317 | 2.3363 | 0.00000 |
| 318 | 2.3593 | 0.00000 |
| 319 | 2.3809 | 0.00000 |
| 320 | 2.4057 | 0.00000 |
| 321 | 2.4265 | 0.00000 |
| 322 | 2.4339 | 0.00000 |
| 323 | 2.4485 | 0.00000 |
| 324 | 2.4575 | 0.00000 |
| 325 | 2.4665 | 0.00000 |
| 326 | 2.5283 | 0.00000 |
| 327 | 2.5458 | 0.00000 |
| 328 | 2.7061 | 0.00000 |
| 329 | 2.7348 | 0.00000 |
| 330 | 2.7519 | 0.00000 |
| 331 | 2.7582 | 0.00000 |
| 332 | 2.7735 | 0.00000 |
| 333 | 2.8265 | 0.00000 |
| 334 | 2.8449 | 0.00000 |
| 335 | 2.8684 | 0.00000 |
| 336 | 2.9020 | 0.00000 |
| 337 | 2.9323 | 0.00000 |

|     |        |         |
|-----|--------|---------|
| 338 | 2.9550 | 0.00000 |
| 339 | 2.9826 | 0.00000 |
| 340 | 3.0058 | 0.00000 |
| 341 | 3.0373 | 0.00000 |
| 342 | 3.0496 | 0.00000 |
| 343 | 3.0715 | 0.00000 |
| 344 | 3.0912 | 0.00000 |
| 345 | 3.1535 | 0.00000 |
| 346 | 3.1707 | 0.00000 |
| 347 | 3.1878 | 0.00000 |
| 348 | 3.1991 | 0.00000 |
| 349 | 3.3073 | 0.00000 |
| 350 | 3.3287 | 0.00000 |
| 351 | 3.3611 | 0.00000 |
| 352 | 3.3716 | 0.00000 |
| 353 | 3.3930 | 0.00000 |
| 354 | 3.4390 | 0.00000 |
| 355 | 3.4824 | 0.00000 |
| 356 | 3.4898 | 0.00000 |
| 357 | 3.4915 | 0.00000 |
| 358 | 3.5021 | 0.00000 |
| 359 | 3.6399 | 0.00000 |

|     |        |         |
|-----|--------|---------|
| 360 | 3.6765 | 0.00000 |
| 361 | 3.7003 | 0.00000 |
| 362 | 3.7369 | 0.00000 |
| 363 | 3.7528 | 0.00000 |
| 364 | 3.7592 | 0.00000 |
| 365 | 3.7769 | 0.00000 |
| 366 | 3.7974 | 0.00000 |
| 367 | 3.8131 | 0.00000 |
| 368 | 3.8388 | 0.00000 |
| 369 | 3.8459 | 0.00000 |
| 370 | 3.8646 | 0.00000 |
| 371 | 3.8788 | 0.00000 |
| 372 | 3.8913 | 0.00000 |
| 373 | 3.9202 | 0.00000 |
| 374 | 3.9334 | 0.00000 |
| 375 | 3.9468 | 0.00000 |
| 376 | 3.9587 | 0.00000 |
| 377 | 3.9824 | 0.00000 |
| 378 | 3.9868 | 0.00000 |
| 379 | 4.0216 | 0.00000 |
| 380 | 4.0778 | 0.00000 |
| 381 | 4.1707 | 0.00000 |

|     |        |         |
|-----|--------|---------|
| 382 | 4.2582 | 0.00000 |
| 383 | 4.2622 | 0.00000 |
| 384 | 4.2688 | 0.00000 |
| 385 | 4.2927 | 0.00000 |
| 386 | 4.3208 | 0.00000 |
| 387 | 4.3344 | 0.00000 |
| 388 | 4.3499 | 0.00000 |
| 389 | 4.3797 | 0.00000 |
| 390 | 4.3843 | 0.00000 |
| 391 | 4.4234 | 0.00000 |
| 392 | 4.4485 | 0.00000 |
| 393 | 4.4749 | 0.00000 |
| 394 | 4.4828 | 0.00000 |
| 395 | 4.4898 | 0.00000 |
| 396 | 4.4992 | 0.00000 |
| 397 | 4.5213 | 0.00000 |
| 398 | 4.5540 | 0.00000 |
| 399 | 4.5914 | 0.00000 |
| 400 | 4.6102 | 0.00000 |
| 401 | 4.6279 | 0.00000 |
| 402 | 4.6455 | 0.00000 |
| 403 | 4.6591 | 0.00000 |

|     |        |         |
|-----|--------|---------|
| 404 | 4.6846 | 0.00000 |
| 405 | 4.7082 | 0.00000 |
| 406 | 4.7362 | 0.00000 |
| 407 | 4.7511 | 0.00000 |
| 408 | 4.7703 | 0.00000 |
| 409 | 4.7856 | 0.00000 |
| 410 | 4.7875 | 0.00000 |
| 411 | 4.8024 | 0.00000 |
| 412 | 4.8324 | 0.00000 |
| 413 | 4.8646 | 0.00000 |
| 414 | 4.8841 | 0.00000 |
| 415 | 4.9013 | 0.00000 |
| 416 | 4.9417 | 0.00000 |
| 417 | 4.9926 | 0.00000 |
| 418 | 5.0092 | 0.00000 |
| 419 | 5.0125 | 0.00000 |
| 420 | 5.0374 | 0.00000 |
| 421 | 5.0439 | 0.00000 |
| 422 | 5.0674 | 0.00000 |
| 423 | 5.0855 | 0.00000 |
| 424 | 5.1177 | 0.00000 |
| 425 | 5.1210 | 0.00000 |

|     |        |         |
|-----|--------|---------|
| 426 | 5.1405 | 0.00000 |
| 427 | 5.1440 | 0.00000 |
| 428 | 5.1686 | 0.00000 |
| 429 | 5.1790 | 0.00000 |
| 430 | 5.1879 | 0.00000 |
| 431 | 5.1925 | 0.00000 |
| 432 | 5.2217 | 0.00000 |
| 433 | 5.2360 | 0.00000 |
| 434 | 5.2448 | 0.00000 |
| 435 | 5.2614 | 0.00000 |
| 436 | 5.2965 | 0.00000 |
| 437 | 5.3011 | 0.00000 |
| 438 | 5.3109 | 0.00000 |
| 439 | 5.3357 | 0.00000 |
| 440 | 5.3519 | 0.00000 |
| 441 | 5.3696 | 0.00000 |
| 442 | 5.3791 | 0.00000 |
| 443 | 5.3935 | 0.00000 |
| 444 | 5.4281 | 0.00000 |
| 445 | 5.4589 | 0.00000 |
| 446 | 5.4679 | 0.00000 |
| 447 | 5.4863 | 0.00000 |

|     |        |         |
|-----|--------|---------|
| 448 | 5.4985 | 0.00000 |
| 449 | 5.5231 | 0.00000 |
| 450 | 5.5671 | 0.00000 |
| 451 | 5.5715 | 0.00000 |
| 452 | 5.5933 | 0.00000 |
| 453 | 5.6071 | 0.00000 |
| 454 | 5.6225 | 0.00000 |
| 455 | 5.6674 | 0.00000 |
| 456 | 5.6910 | 0.00000 |
| 457 | 5.7170 | 0.00000 |
| 458 | 5.7266 | 0.00000 |
| 459 | 5.7484 | 0.00000 |
| 460 | 5.7624 | 0.00000 |
| 461 | 5.7885 | 0.00000 |
| 462 | 5.7906 | 0.00000 |
| 463 | 5.7968 | 0.00000 |
| 464 | 5.8031 | 0.00000 |
| 465 | 5.8195 | 0.00000 |
| 466 | 5.8251 | 0.00000 |
| 467 | 5.8537 | 0.00000 |
| 468 | 5.8605 | 0.00000 |
| 469 | 5.8795 | 0.00000 |

|     |        |         |
|-----|--------|---------|
| 470 | 5.8847 | 0.00000 |
| 471 | 5.8891 | 0.00000 |
| 472 | 5.9050 | 0.00000 |
| 473 | 5.9199 | 0.00000 |
| 474 | 5.9449 | 0.00000 |
| 475 | 5.9510 | 0.00000 |
| 476 | 5.9684 | 0.00000 |
| 477 | 5.9753 | 0.00000 |
| 478 | 5.9899 | 0.00000 |
| 479 | 6.0102 | 0.00000 |
| 480 | 6.0436 | 0.00000 |

-----

soft charge-density along one line, spin component

1

0

1

2

3

4

5

6

7

8

9

total charge-density along one line

soft charge-density along one line, spin component

2

0 1 2 3 4 5 6 7

8 9

total charge-density along one line

pseudopotential strength for first ion, spin component: 1

-2.331 -4.014 -0.002 0.000 0.000

-4.014 -6.828 -0.006 0.000 -0.000

-0.002 -0.006 -0.336 -0.000 0.000

0.000 0.000 -0.000 -0.341 -0.000

0.000 -0.000 0.000 -0.000 -0.341

pseudopotential strength for first ion, spin component: 2

-2.331 -4.014 -0.002 0.000 0.000

-4.014 -6.828 -0.006 0.000 -0.000

-0.002 -0.006 -0.336 -0.000 0.000

0.000 0.000 -0.000 -0.341 -0.000

0.000 -0.000 0.000 -0.000 -0.341

total augmentation occupancy for first ion, spin component: 1

3.579 -0.646 0.444 -0.034 -0.000

-0.646 0.130 -0.082 0.006 0.000

0.444 -0.082 0.056 -0.003 -0.000

-0.034 0.006 -0.003 0.011 0.000

-0.000 0.000 -0.000 0.000 0.007

total augmentation occupancy for first ion, spin component:

2

-0.000 0.000 -0.000 0.000 0.000

0.000 -0.000 0.000 -0.000 -0.000

-0.000 0.000 -0.000 -0.000 -0.000

0.000 -0.000 -0.000 -0.000 -0.000

0.000 -0.000 -0.000 -0.000 -0.000

----- aborting loop because EDIFF is reached -----

total charge

| # of ion | s | p | d | tot |
|----------|---|---|---|-----|
|----------|---|---|---|-----|

-----

|   |       |       |       |       |
|---|-------|-------|-------|-------|
| 1 | 0.646 | 0.043 | 0.000 | 0.690 |
|---|-------|-------|-------|-------|

|   |       |       |       |       |
|---|-------|-------|-------|-------|
| 2 | 0.646 | 0.043 | 0.000 | 0.690 |
|---|-------|-------|-------|-------|

|   |       |       |       |       |
|---|-------|-------|-------|-------|
| 3 | 0.646 | 0.043 | 0.000 | 0.690 |
|---|-------|-------|-------|-------|

|   |       |       |       |       |
|---|-------|-------|-------|-------|
| 4 | 0.646 | 0.043 | 0.000 | 0.690 |
|---|-------|-------|-------|-------|

|    |       |       |       |       |
|----|-------|-------|-------|-------|
| 5  | 0.646 | 0.043 | 0.000 | 0.690 |
| 6  | 0.646 | 0.043 | 0.000 | 0.690 |
| 7  | 0.646 | 0.043 | 0.000 | 0.690 |
| 8  | 0.646 | 0.043 | 0.000 | 0.690 |
| 9  | 0.646 | 0.043 | 0.000 | 0.690 |
| 10 | 0.646 | 0.043 | 0.000 | 0.690 |
| 11 | 0.646 | 0.043 | 0.000 | 0.690 |
| 12 | 0.646 | 0.043 | 0.000 | 0.690 |
| 13 | 0.646 | 0.043 | 0.000 | 0.689 |
| 14 | 0.646 | 0.043 | 0.000 | 0.689 |
| 15 | 0.648 | 0.045 | 0.000 | 0.693 |
| 16 | 0.646 | 0.043 | 0.000 | 0.689 |
| 17 | 0.646 | 0.043 | 0.000 | 0.689 |
| 18 | 0.646 | 0.043 | 0.000 | 0.689 |
| 19 | 0.646 | 0.043 | 0.000 | 0.689 |
| 20 | 0.646 | 0.043 | 0.000 | 0.689 |
| 21 | 0.646 | 0.043 | 0.000 | 0.689 |
| 22 | 0.646 | 0.044 | 0.000 | 0.690 |
| 23 | 0.542 | 0.015 | 0.000 | 0.557 |
| 24 | 0.541 | 0.015 | 0.000 | 0.556 |
| 25 | 0.870 | 1.763 | 0.000 | 2.633 |
| 26 | 0.867 | 1.785 | 0.000 | 2.653 |

|    |       |       |       |       |
|----|-------|-------|-------|-------|
| 27 | 0.867 | 1.786 | 0.000 | 2.653 |
| 28 | 0.870 | 1.762 | 0.000 | 2.632 |
| 29 | 0.865 | 1.783 | 0.000 | 2.648 |
| 30 | 0.870 | 1.763 | 0.000 | 2.633 |
| 31 | 0.867 | 1.786 | 0.000 | 2.653 |
| 32 | 0.867 | 1.786 | 0.000 | 2.653 |
| 33 | 0.870 | 1.762 | 0.000 | 2.632 |
| 34 | 0.865 | 1.783 | 0.000 | 2.648 |
| 35 | 0.870 | 1.763 | 0.000 | 2.633 |
| 36 | 0.868 | 1.787 | 0.000 | 2.654 |
| 37 | 0.867 | 1.786 | 0.000 | 2.653 |
| 38 | 0.870 | 1.763 | 0.000 | 2.633 |
| 39 | 0.865 | 1.784 | 0.000 | 2.649 |
| 40 | 0.870 | 1.763 | 0.000 | 2.633 |
| 41 | 0.868 | 1.787 | 0.000 | 2.655 |
| 42 | 0.867 | 1.786 | 0.000 | 2.653 |
| 43 | 0.871 | 1.764 | 0.000 | 2.634 |
| 44 | 0.865 | 1.783 | 0.000 | 2.648 |
| 45 | 0.870 | 1.763 | 0.000 | 2.633 |
| 46 | 0.867 | 1.786 | 0.000 | 2.653 |
| 47 | 0.867 | 1.786 | 0.000 | 2.653 |
| 48 | 0.871 | 1.763 | 0.000 | 2.634 |

|    |       |       |       |       |
|----|-------|-------|-------|-------|
| 49 | 0.865 | 1.783 | 0.000 | 2.648 |
| 50 | 0.870 | 1.763 | 0.000 | 2.633 |
| 51 | 0.867 | 1.786 | 0.000 | 2.653 |
| 52 | 0.867 | 1.786 | 0.000 | 2.653 |
| 53 | 0.870 | 1.762 | 0.000 | 2.632 |
| 54 | 0.865 | 1.784 | 0.000 | 2.648 |
| 55 | 0.865 | 1.784 | 0.000 | 2.649 |
| 56 | 0.865 | 1.786 | 0.000 | 2.651 |
| 57 | 0.866 | 1.787 | 0.000 | 2.653 |
| 58 | 0.866 | 1.790 | 0.000 | 2.656 |
| 59 | 0.865 | 1.786 | 0.000 | 2.651 |
| 60 | 0.866 | 1.786 | 0.000 | 2.651 |
| 61 | 0.866 | 1.788 | 0.000 | 2.654 |
| 62 | 0.867 | 1.791 | 0.000 | 2.658 |
| 63 | 0.865 | 1.784 | 0.000 | 2.649 |
| 64 | 0.865 | 1.786 | 0.000 | 2.651 |
| 65 | 0.866 | 1.787 | 0.000 | 2.652 |
| 66 | 0.865 | 1.788 | 0.000 | 2.653 |
| 67 | 0.865 | 1.786 | 0.000 | 2.651 |
| 68 | 0.866 | 1.785 | 0.000 | 2.651 |
| 69 | 0.865 | 1.787 | 0.000 | 2.652 |
| 70 | 0.866 | 1.787 | 0.000 | 2.653 |

|    |       |       |       |       |
|----|-------|-------|-------|-------|
| 71 | 0.865 | 1.784 | 0.000 | 2.649 |
| 72 | 0.865 | 1.786 | 0.000 | 2.651 |
| 73 | 0.866 | 1.786 | 0.000 | 2.652 |
| 74 | 0.864 | 1.785 | 0.000 | 2.649 |
| 75 | 0.865 | 1.786 | 0.000 | 2.651 |
| 76 | 0.866 | 1.786 | 0.000 | 2.651 |
| 77 | 0.865 | 1.786 | 0.000 | 2.651 |
| 78 | 0.865 | 1.784 | 0.000 | 2.649 |
| 79 | 0.865 | 1.784 | 0.000 | 2.649 |
| 80 | 0.865 | 1.786 | 0.000 | 2.651 |
| 81 | 0.865 | 1.785 | 0.000 | 2.650 |
| 82 | 0.863 | 1.782 | 0.000 | 2.645 |
| 83 | 0.865 | 1.786 | 0.000 | 2.651 |
| 84 | 0.866 | 1.786 | 0.000 | 2.651 |
| 85 | 0.865 | 1.784 | 0.000 | 2.648 |
| 86 | 0.862 | 1.774 | 0.000 | 2.636 |
| 87 | 0.865 | 1.784 | 0.000 | 2.649 |
| 88 | 0.865 | 1.787 | 0.000 | 2.652 |
| 89 | 0.865 | 1.785 | 0.000 | 2.650 |
| 90 | 0.865 | 1.788 | 0.000 | 2.653 |
| 91 | 0.865 | 1.786 | 0.000 | 2.651 |
| 92 | 0.866 | 1.786 | 0.000 | 2.651 |

|     |       |       |       |       |
|-----|-------|-------|-------|-------|
| 93  | 0.864 | 1.783 | 0.000 | 2.647 |
| 94  | 0.866 | 1.785 | 0.000 | 2.651 |
| 95  | 0.865 | 1.784 | 0.000 | 2.649 |
| 96  | 0.865 | 1.786 | 0.000 | 2.651 |
| 97  | 0.866 | 1.787 | 0.000 | 2.653 |
| 98  | 0.866 | 1.789 | 0.000 | 2.655 |
| 99  | 0.865 | 1.786 | 0.000 | 2.651 |
| 100 | 0.866 | 1.786 | 0.000 | 2.651 |
| 101 | 0.865 | 1.787 | 0.000 | 2.652 |
| 102 | 0.867 | 1.790 | 0.000 | 2.657 |
| 103 | 0.865 | 1.786 | 0.000 | 2.651 |
| 104 | 0.867 | 1.785 | 0.000 | 2.653 |
| 105 | 0.866 | 1.786 | 0.000 | 2.652 |
| 106 | 0.870 | 1.778 | 0.000 | 2.648 |
| 107 | 0.869 | 1.765 | 0.000 | 2.635 |
| 108 | 0.865 | 1.783 | 0.000 | 2.648 |
| 109 | 0.869 | 1.789 | 0.000 | 2.658 |
| 110 | 0.865 | 1.786 | 0.000 | 2.651 |
| 111 | 0.867 | 1.785 | 0.000 | 2.653 |
| 112 | 0.867 | 1.789 | 0.000 | 2.655 |
| 113 | 0.871 | 1.782 | 0.000 | 2.653 |
| 114 | 0.869 | 1.765 | 0.000 | 2.634 |

|     |       |       |       |       |
|-----|-------|-------|-------|-------|
| 115 | 0.865 | 1.783 | 0.000 | 2.648 |
| 116 | 0.870 | 1.791 | 0.000 | 2.661 |
| 117 | 0.865 | 1.786 | 0.000 | 2.651 |
| 118 | 0.867 | 1.786 | 0.000 | 2.653 |
| 119 | 0.865 | 1.782 | 0.000 | 2.647 |
| 120 | 0.858 | 1.706 | 0.000 | 2.564 |
| 121 | 0.869 | 1.765 | 0.000 | 2.634 |
| 122 | 0.865 | 1.783 | 0.000 | 2.648 |
| 123 | 0.866 | 1.778 | 0.000 | 2.644 |
| 124 | 0.866 | 1.786 | 0.000 | 2.652 |
| 125 | 0.868 | 1.785 | 0.000 | 2.653 |
| 126 | 0.862 | 1.776 | 0.000 | 2.638 |
| 127 | 0.849 | 1.829 | 0.000 | 2.679 |
| 128 | 0.870 | 1.767 | 0.000 | 2.637 |
| 129 | 0.865 | 1.783 | 0.000 | 2.648 |
| 130 | 0.860 | 1.757 | 0.000 | 2.617 |
| 131 | 0.866 | 1.786 | 0.000 | 2.652 |
| 132 | 0.867 | 1.784 | 0.000 | 2.652 |
| 133 | 0.864 | 1.787 | 0.000 | 2.651 |
| 134 | 0.869 | 1.789 | 0.000 | 2.659 |
| 135 | 0.869 | 1.767 | 0.000 | 2.636 |
| 136 | 0.865 | 1.783 | 0.000 | 2.648 |

|     |       |       |       |       |
|-----|-------|-------|-------|-------|
| 137 | 0.866 | 1.772 | 0.000 | 2.638 |
| 138 | 0.866 | 1.786 | 0.000 | 2.652 |
| 139 | 0.867 | 1.785 | 0.000 | 2.652 |
| 140 | 0.866 | 1.788 | 0.000 | 2.654 |
| 141 | 0.870 | 1.779 | 0.000 | 2.649 |
| 142 | 0.869 | 1.766 | 0.000 | 2.635 |
| 143 | 0.865 | 1.783 | 0.000 | 2.648 |
| 144 | 0.869 | 1.790 | 0.000 | 2.659 |
| 145 | 0.936 | 1.701 | 0.000 | 2.637 |
| 146 | 1.240 | 1.545 | 0.075 | 2.860 |
| 147 | 1.631 | 3.508 | 0.000 | 5.140 |

-----

tot            123.055 221.511    0.075 344.641

magnetization (x)

| # of ion | s | p | d | tot |
|----------|---|---|---|-----|
|----------|---|---|---|-----|

-----

|   |       |        |       |       |
|---|-------|--------|-------|-------|
| 1 | 0.000 | -0.000 | 0.000 | 0.000 |
|---|-------|--------|-------|-------|

|   |        |       |       |        |
|---|--------|-------|-------|--------|
| 2 | -0.000 | 0.000 | 0.000 | -0.000 |
|---|--------|-------|-------|--------|

|    |        |        |       |        |
|----|--------|--------|-------|--------|
| 3  | 0.000  | -0.000 | 0.000 | 0.000  |
| 4  | -0.000 | 0.000  | 0.000 | -0.000 |
| 5  | 0.000  | -0.000 | 0.000 | 0.000  |
| 6  | -0.000 | 0.000  | 0.000 | -0.000 |
| 7  | 0.000  | -0.000 | 0.000 | 0.000  |
| 8  | -0.000 | 0.000  | 0.000 | -0.000 |
| 9  | 0.000  | -0.000 | 0.000 | 0.000  |
| 10 | -0.000 | 0.000  | 0.000 | -0.000 |
| 11 | 0.000  | -0.000 | 0.000 | 0.000  |
| 12 | -0.000 | 0.000  | 0.000 | -0.000 |
| 13 | 0.000  | -0.000 | 0.000 | 0.000  |
| 14 | -0.004 | 0.002  | 0.000 | -0.002 |
| 15 | 0.000  | -0.000 | 0.000 | 0.000  |
| 16 | -0.004 | 0.002  | 0.000 | -0.002 |
| 17 | -0.004 | 0.002  | 0.000 | -0.002 |
| 18 | 0.000  | -0.000 | 0.000 | 0.000  |
| 19 | -0.003 | 0.001  | 0.000 | -0.002 |
| 20 | 0.000  | -0.000 | 0.000 | 0.000  |
| 21 | -0.003 | 0.002  | 0.000 | -0.002 |
| 22 | -0.003 | 0.002  | 0.000 | -0.002 |
| 23 | -0.000 | 0.000  | 0.000 | -0.000 |
| 24 | -0.000 | 0.000  | 0.000 | -0.000 |

|    |        |        |       |        |
|----|--------|--------|-------|--------|
| 25 | -0.000 | -0.007 | 0.000 | -0.008 |
| 26 | -0.000 | -0.002 | 0.000 | -0.002 |
| 27 | 0.000  | 0.003  | 0.000 | 0.003  |
| 28 | 0.000  | 0.005  | 0.000 | 0.005  |
| 29 | 0.000  | 0.003  | 0.000 | 0.003  |
| 30 | -0.000 | -0.007 | 0.000 | -0.008 |
| 31 | -0.000 | -0.002 | 0.000 | -0.002 |
| 32 | 0.000  | 0.003  | 0.000 | 0.003  |
| 33 | 0.000  | 0.005  | 0.000 | 0.005  |
| 34 | 0.000  | 0.002  | 0.000 | 0.002  |
| 35 | -0.000 | -0.007 | 0.000 | -0.008 |
| 36 | -0.000 | -0.002 | 0.000 | -0.002 |
| 37 | 0.000  | 0.003  | 0.000 | 0.003  |
| 38 | 0.000  | 0.006  | 0.000 | 0.007  |
| 39 | 0.000  | 0.002  | 0.000 | 0.002  |
| 40 | -0.000 | -0.007 | 0.000 | -0.008 |
| 41 | -0.000 | -0.002 | 0.000 | -0.002 |
| 42 | 0.000  | 0.002  | 0.000 | 0.003  |
| 43 | 0.000  | 0.005  | 0.000 | 0.006  |
| 44 | 0.000  | 0.004  | 0.000 | 0.004  |
| 45 | -0.000 | -0.007 | 0.000 | -0.008 |
| 46 | -0.000 | -0.002 | 0.000 | -0.002 |

|    |        |        |       |        |
|----|--------|--------|-------|--------|
| 47 | 0.000  | 0.003  | 0.000 | 0.003  |
| 48 | 0.000  | 0.005  | 0.000 | 0.006  |
| 49 | 0.000  | 0.001  | 0.000 | 0.002  |
| 50 | -0.000 | -0.007 | 0.000 | -0.008 |
| 51 | -0.000 | -0.002 | 0.000 | -0.002 |
| 52 | 0.000  | 0.002  | 0.000 | 0.003  |
| 53 | 0.000  | 0.006  | 0.000 | 0.007  |
| 54 | 0.000  | 0.002  | 0.000 | 0.002  |
| 55 | -0.000 | -0.005 | 0.000 | -0.006 |
| 56 | -0.000 | -0.007 | 0.000 | -0.007 |
| 57 | -0.000 | -0.001 | 0.000 | -0.001 |
| 58 | -0.000 | -0.001 | 0.000 | -0.001 |
| 59 | 0.000  | 0.006  | 0.000 | 0.007  |
| 60 | 0.000  | 0.003  | 0.000 | 0.003  |
| 61 | 0.000  | 0.001  | 0.000 | 0.001  |
| 62 | 0.000  | 0.003  | 0.000 | 0.003  |
| 63 | -0.000 | -0.005 | 0.000 | -0.006 |
| 64 | -0.000 | -0.007 | 0.000 | -0.007 |
| 65 | -0.000 | -0.001 | 0.000 | -0.001 |
| 66 | -0.000 | -0.001 | 0.000 | -0.001 |
| 67 | 0.000  | 0.006  | 0.000 | 0.006  |
| 68 | 0.000  | 0.003  | 0.000 | 0.003  |

|    |        |        |       |        |
|----|--------|--------|-------|--------|
| 69 | 0.000  | 0.001  | 0.000 | 0.001  |
| 70 | 0.000  | 0.002  | 0.000 | 0.002  |
| 71 | -0.000 | -0.005 | 0.000 | -0.006 |
| 72 | -0.000 | -0.007 | 0.000 | -0.007 |
| 73 | -0.000 | -0.001 | 0.000 | -0.001 |
| 74 | -0.000 | -0.002 | 0.000 | -0.002 |
| 75 | 0.000  | 0.006  | 0.000 | 0.007  |
| 76 | 0.000  | 0.003  | 0.000 | 0.004  |
| 77 | 0.000  | 0.003  | 0.000 | 0.003  |
| 78 | 0.000  | 0.001  | 0.000 | 0.001  |
| 79 | -0.000 | -0.005 | 0.000 | -0.006 |
| 80 | -0.000 | -0.007 | 0.000 | -0.007 |
| 81 | -0.000 | -0.001 | 0.000 | -0.002 |
| 82 | -0.000 | -0.002 | 0.000 | -0.002 |
| 83 | 0.001  | 0.007  | 0.000 | 0.008  |
| 84 | 0.000  | 0.003  | 0.000 | 0.003  |
| 85 | 0.000  | 0.002  | 0.000 | 0.002  |
| 86 | 0.000  | 0.005  | 0.000 | 0.006  |
| 87 | -0.000 | -0.005 | 0.000 | -0.005 |
| 88 | -0.000 | -0.007 | 0.000 | -0.007 |
| 89 | -0.000 | -0.001 | 0.000 | -0.002 |
| 90 | -0.000 | -0.002 | 0.000 | -0.002 |

|     |        |        |       |        |
|-----|--------|--------|-------|--------|
| 91  | 0.001  | 0.008  | 0.000 | 0.008  |
| 92  | 0.000  | 0.003  | 0.000 | 0.003  |
| 93  | 0.000  | 0.002  | 0.000 | 0.003  |
| 94  | 0.000  | 0.001  | 0.000 | 0.001  |
| 95  | -0.000 | -0.005 | 0.000 | -0.006 |
| 96  | -0.000 | -0.007 | 0.000 | -0.007 |
| 97  | -0.000 | -0.001 | 0.000 | -0.001 |
| 98  | -0.000 | -0.001 | 0.000 | -0.001 |
| 99  | 0.001  | 0.007  | 0.000 | 0.007  |
| 100 | 0.000  | 0.003  | 0.000 | 0.004  |
| 101 | 0.000  | 0.003  | 0.000 | 0.003  |
| 102 | 0.000  | 0.002  | 0.000 | 0.002  |
| 103 | -0.001 | -0.010 | 0.000 | -0.011 |
| 104 | -0.003 | -0.028 | 0.000 | -0.031 |
| 105 | -0.000 | -0.001 | 0.000 | -0.002 |
| 106 | -0.000 | -0.004 | 0.000 | -0.005 |
| 107 | 0.007  | 0.116  | 0.000 | 0.122  |
| 108 | 0.001  | 0.010  | 0.000 | 0.011  |
| 109 | 0.000  | 0.001  | 0.000 | 0.001  |
| 110 | -0.001 | -0.010 | 0.000 | -0.011 |
| 111 | -0.003 | -0.028 | 0.000 | -0.031 |
| 112 | -0.000 | -0.001 | 0.000 | -0.002 |

|     |        |        |       |        |
|-----|--------|--------|-------|--------|
| 113 | -0.000 | -0.004 | 0.000 | -0.004 |
| 114 | 0.007  | 0.120  | 0.000 | 0.127  |
| 115 | 0.001  | 0.010  | 0.000 | 0.011  |
| 116 | 0.000  | 0.001  | 0.000 | 0.002  |
| 117 | -0.001 | -0.010 | 0.000 | -0.011 |
| 118 | -0.003 | -0.026 | 0.000 | -0.029 |
| 119 | -0.000 | -0.002 | 0.000 | -0.002 |
| 120 | -0.000 | -0.002 | 0.000 | -0.002 |
| 121 | 0.007  | 0.115  | 0.000 | 0.122  |
| 122 | 0.001  | 0.010  | 0.000 | 0.010  |
| 123 | 0.000  | 0.003  | 0.000 | 0.003  |
| 124 | -0.001 | -0.010 | 0.000 | -0.011 |
| 125 | -0.003 | -0.024 | 0.000 | -0.027 |
| 126 | -0.000 | -0.002 | 0.000 | -0.002 |
| 127 | -0.000 | 0.001  | 0.000 | 0.000  |
| 128 | 0.006  | 0.105  | 0.000 | 0.111  |
| 129 | 0.001  | 0.009  | 0.000 | 0.010  |
| 130 | 0.000  | 0.004  | 0.000 | 0.004  |
| 131 | -0.001 | -0.009 | 0.000 | -0.010 |
| 132 | -0.003 | -0.024 | 0.000 | -0.027 |
| 133 | -0.000 | -0.002 | 0.000 | -0.002 |
| 134 | -0.000 | -0.002 | 0.000 | -0.002 |

|     |        |        |        |        |
|-----|--------|--------|--------|--------|
| 135 | 0.006  | 0.097  | 0.000  | 0.102  |
| 136 | 0.001  | 0.009  | 0.000  | 0.010  |
| 137 | 0.000  | 0.004  | 0.000  | 0.005  |
| 138 | -0.001 | -0.010 | 0.000  | -0.011 |
| 139 | -0.003 | -0.026 | 0.000  | -0.029 |
| 140 | -0.000 | -0.002 | 0.000  | -0.002 |
| 141 | -0.000 | -0.004 | 0.000  | -0.004 |
| 142 | 0.006  | 0.105  | 0.000  | 0.111  |
| 143 | 0.001  | 0.010  | 0.000  | 0.010  |
| 144 | 0.000  | 0.002  | 0.000  | 0.003  |
| 145 | 0.000  | 0.005  | 0.000  | 0.006  |
| 146 | -0.000 | 0.000  | -0.000 | 0.000  |
| 147 | 0.000  | 0.004  | 0.000  | 0.005  |

-----

|     |       |       |        |       |
|-----|-------|-------|--------|-------|
| tot | 0.001 | 0.513 | -0.000 | 0.514 |
|-----|-------|-------|--------|-------|

CHARGE:  cpu time     0.5237: real time     0.5254

FORLOC:  cpu time     0.0198: real time     0.0199

FORNL :  cpu time     2.0611: real time     2.0719

STRESS:  cpu time     6.2028: real time     6.2251

FORCOR:  cpu time     0.1432: real time     0.1450

FORHAR:  cpu time     0.0335: real time     0.0336

MIXING: cpu time 0.0107: real time 0.0107

OFIELD: cpu time 0.0001: real time 0.0001

-----  
DFTD3 V3.0 Rev 1

Edisp (eV) -6.61765

E6 (eV): -3.9312

E8 (eV): -2.6864

% E8 : 40.59

FORVDW: cpu time 1.8463: real time 1.8746

FORCE on cell =-STRESS in cart. coord. units (eV):

Direction XX YY ZZ XY YZ ZX

-----  
Alpha Z 233.50077 233.50077 233.50077

Ewald 107573.21105 23482.34343-39735.96351 9.79010 3450.08921 128.02553

Hartree106088.71144 25038.36984-23801.44325 -6.34576 2945.19293 93.15110

E(xc) -1914.14560 -1916.49392 -1979.81554 0.13094 1.81702 0.12932

Local \*\*\*\*\*-53969.66323 57030.80920 -0.19394 -6353.95095 -217.85569

n-local -472.54018 -482.28974 -439.37095 -0.66261 -0.58629 -0.30663

|                     |            |            |                 |          |           |          |
|---------------------|------------|------------|-----------------|----------|-----------|----------|
| augment             | -38.30599  | -38.59417  | -34.29594       | 0.01271  | -0.96620  | 0.00370  |
| Kinetic             | 7634.65338 | 7638.10556 | 8713.70951      | -3.08850 | -41.68273 | -3.17305 |
| Fock                | 0.00000    | 0.00000    | 0.00000         | 0.00000  | 0.00000   | 0.00000  |
| vdW                 | -2.64194   | -1.49192   | -6.59298        | 0.00137  | -0.07436  | 0.01163  |
| -----               |            |            |                 |          |           |          |
| Total               | -17.77782  | -16.21338  | -19.46268       | -0.35568 | -0.16135  | -0.01408 |
| in kB               | -4.90233   | -4.47093   | -5.36694        | -0.09808 | -0.04449  | -0.00388 |
| external pressure = |            | -4.91 kB   | Pullay stress = |          | 0.00 kB   |          |

VOLUME and BASIS-vectors are now :

energy-cutoff : 400.00

volume of cell : 5810.14

direct lattice vectors

reciprocal lattice vectors

|              |              |              |             |             |             |
|--------------|--------------|--------------|-------------|-------------|-------------|
| 14.780600000 | 0.000000000  | 0.000000000  | 0.067656252 | 0.000000000 | 0.000000000 |
| 0.000000000  | 21.333900000 | 0.000000000  | 0.000000000 | 0.046873755 | 0.000000000 |
| 0.000000000  | 0.000000000  | 18.425700000 | 0.000000000 | 0.000000000 | 0.054272022 |

length of vectors

|              |              |              |             |             |             |
|--------------|--------------|--------------|-------------|-------------|-------------|
| 14.780600000 | 21.333900000 | 18.425700000 | 0.067656252 | 0.046873755 | 0.054272022 |
|--------------|--------------|--------------|-------------|-------------|-------------|

FORCES acting on ions

electron-ion (+dipol)

ewald-force

non-local-force

convergence-correction

-----

|           |           |           |           |           |           |           |           |   |
|-----------|-----------|-----------|-----------|-----------|-----------|-----------|-----------|---|
| 0.441E-02 | 0.154E+03 | 0.361E+02 | -.292E-02 | -.160E+03 | -.357E+02 | -.179E-02 | 0.566E+01 | - |
| .438E+00  | 0.971E-07 | -.120E-06 | -.594E-06 |           |           |           |           |   |
| -.189E-01 | 0.155E+03 | -.340E+02 | 0.165E-01 | -.160E+03 | 0.335E+02 | 0.116E-02 | 0.565E+01 |   |
| 0.541E+00 | 0.941E-06 | 0.487E-06 | 0.731E-07 |           |           |           |           |   |
| 0.184E+00 | 0.154E+03 | 0.360E+02 | -.184E+00 | -.160E+03 | -.356E+02 | 0.515E-05 | 0.565E+01 | - |
| .443E+00  | 0.125E-06 | -.439E-06 | -.194E-06 |           |           |           |           |   |
| 0.112E+00 | 0.155E+03 | -.341E+02 | -.991E-01 | -.160E+03 | 0.336E+02 | -.175E-01 | 0.565E+01 |   |
| 0.535E+00 | 0.124E-06 | -.732E-07 | 0.445E-06 |           |           |           |           |   |
| 0.172E+00 | 0.154E+03 | 0.362E+02 | -.173E+00 | -.160E+03 | -.357E+02 | 0.116E-02 | 0.566E+01 | - |
| .440E+00  | 0.733E-07 | -.375E-06 | -.483E-06 |           |           |           |           |   |
| 0.127E+00 | 0.154E+03 | -.340E+02 | -.109E+00 | -.160E+03 | 0.334E+02 | -.211E-01 | 0.565E+01 |   |
| 0.541E+00 | -.706E-06 | -.535E-07 | -.747E-07 |           |           |           |           |   |
| -.190E-01 | 0.154E+03 | 0.363E+02 | 0.179E-01 | -.160E+03 | -.359E+02 | 0.158E-02 | 0.566E+01 | - |
| .431E+00  | -.108E-07 | -.953E-07 | -.112E-05 |           |           |           |           |   |
| -.124E-01 | 0.154E+03 | -.338E+02 | 0.193E-01 | -.160E+03 | 0.332E+02 | -.721E-02 | 0.565E+01 |   |
| 0.555E+00 | -.793E-06 | 0.520E-06 | -.947E-06 |           |           |           |           |   |
| -.182E+00 | 0.154E+03 | 0.363E+02 | 0.182E+00 | -.160E+03 | -.359E+02 | 0.259E-03 | 0.566E+01 | - |

.429E+00    -.167E-06 0.171E-06 -.150E-05  
              -.128E+00 0.155E+03 -.337E+02    0.115E+00 -.160E+03 0.331E+02    0.109E-01 0.565E+01  
0.561E+00    -.208E-06 0.992E-06 -.129E-05  
              -.174E+00 0.154E+03 0.362E+02    0.176E+00 -.160E+03 -.358E+02    -.176E-02 0.566E+01 -  
.432E+00    -.119E-06 0.180E-06 -.126E-05  
              -.116E+00 0.155E+03 -.338E+02    0.965E-01 -.160E+03 0.332E+02    0.192E-01 0.565E+01  
0.555E+00    0.651E-06 0.105E-05 -.792E-06  
              0.228E+01 -.150E+03 -.387E+02    -.227E+01 0.156E+03 0.386E+02    -.103E-01 -.566E+01  
0.766E-01    -.512E-06 0.250E-06 -.880E-07  
              -.415E+00 -.151E+03 0.388E+02    0.416E+00 0.157E+03 -.386E+02    -.126E-02 -.567E+01 -  
.269E+00    -.131E-07 0.259E-06 -.164E-07  
              0.136E+02 -.146E+03 -.413E+02    -.138E+02 0.151E+03 0.413E+02    0.257E+00 -.567E+01 -  
.349E-01    -.127E-06 0.256E-06 0.137E-06  
              0.162E+01 -.151E+03 0.402E+02    -.162E+01 0.156E+03 -.400E+02    -.101E-02 -.567E+01 -  
.229E+00    -.247E-06 -.774E-08 -.611E-06  
              0.352E+01 -.149E+03 0.443E+02    -.352E+01 0.155E+03 -.441E+02    -.207E-02 -.567E+01 -  
.180E+00    -.359E-06 0.629E-07 -.615E-06  
              -.148E+02 -.146E+03 -.330E+02    0.149E+02 0.151E+03 0.330E+02    -.943E-01 -.566E+01  
0.477E-01    0.118E-05 0.112E-06 -.869E-06  
              -.297E+01 -.149E+03 0.432E+02    0.296E+01 0.155E+03 -.430E+02    0.115E-01 -.567E+01 -  
.241E+00    0.297E-06 0.381E-06 0.214E-06  
              -.379E+01 -.150E+03 -.385E+02    0.379E+01 0.155E+03 0.385E+02    -.601E-02 -.566E+01

0.238E-01 0.238E-06 0.356E-06 -.292E-06  
-.207E+01 -.151E+03 0.395E+02 0.207E+01 0.156E+03 -.392E+02 0.155E-02 -.566E+01 -  
.282E+00 0.421E-06 0.415E-06 0.316E-06  
0.383E-03 -.148E+03 0.486E+02 0.723E-02 0.154E+03 -.484E+02 -.552E-02 -.570E+01 -  
.158E+00 -.122E-06 0.264E-06 -.780E-07  
0.196E+02 -.103E+03 0.222E+02 -.212E+02 0.103E+03 -.246E+02 0.153E+01 0.138E+00  
0.238E+01 -.716E-07 0.811E-06 -.527E-06  
-.192E+02 -.103E+03 0.153E+02 0.216E+02 0.103E+03 -.168E+02 -.241E+01 -.120E+00  
0.151E+01 -.249E-06 0.129E-05 -.101E-05  
0.709E-01 0.461E+03 0.202E+03 -.742E-01 -.462E+03 -.201E+03 0.385E-02 0.102E+01 -  
.219E+00 -.315E-06 0.366E-07 -.129E-05  
0.212E+00 0.353E+03 -.234E+03 -.212E+00 -.353E+03 0.234E+03 0.260E-02 0.443E+00 -  
.371E-01 0.920E-06 -.803E-06 0.217E-05  
-.249E-01 0.351E+03 0.240E+03 0.235E-01 -.351E+03 -.241E+03 0.318E-02 0.408E+00  
0.565E-01 -.894E-06 0.110E-05 -.197E-05  
-.174E+00 0.462E+03 -.195E+03 0.180E+00 -.463E+03 0.195E+03 -.659E-02 0.105E+01  
0.233E+00 0.254E-05 0.990E-06 0.115E-05  
-.620E-01 0.210E+03 -.272E+03 0.661E-01 -.210E+03 0.272E+03 -.448E-02 0.944E-01  
0.560E-01 0.146E-06 -.106E-05 0.143E-05  
0.562E+00 0.461E+03 0.202E+03 -.565E+00 -.462E+03 -.201E+03 0.200E-02 0.102E+01 -  
.214E+00 0.288E-06 -.724E-06 -.320E-07  
0.106E+01 0.352E+03 -.234E+03 -.107E+01 -.353E+03 0.234E+03 0.159E-01 0.449E+00 -

.425E-01    -.994E-06 -.112E-05 0.167E-05  
0.413E+00 0.351E+03 0.240E+03    -.415E+00 -.351E+03 -.240E+03    0.303E-02 0.408E+00

0.493E-01    -.219E-06 0.558E-06 -.477E-07  
0.579E+00 0.462E+03 -.195E+03    -.584E+00 -.463E+03 0.195E+03    0.475E-02 0.105E+01

0.235E+00    -.667E-07 -.135E-05 0.227E-05  
0.688E+00 0.210E+03 -.272E+03    -.693E+00 -.210E+03 0.272E+03    0.594E-02 0.920E-01

0.617E-01    -.469E-06 -.993E-06 0.104E-05  
0.426E+00 0.461E+03 0.202E+03    -.429E+00 -.462E+03 -.202E+03    0.381E-02 0.102E+01 -

.213E+00    0.782E-06 -.590E-06 -.131E-05  
0.939E+00 0.352E+03 -.233E+03    -.955E+00 -.352E+03 0.233E+03    0.150E-01 0.442E+00 -

.377E-01    -.142E-05 0.876E-06 -.834E-06  
0.478E+00 0.351E+03 0.241E+03    -.480E+00 -.351E+03 -.241E+03    0.247E-02 0.406E+00

0.513E-01    0.620E-06 0.327E-06 -.176E-06  
0.706E+00 0.462E+03 -.194E+03    -.716E+00 -.463E+03 0.194E+03    0.777E-02 0.106E+01

0.242E+00    -.192E-05 -.350E-06 0.305E-06  
0.723E+00 0.210E+03 -.271E+03    -.731E+00 -.210E+03 0.271E+03    0.634E-02 0.918E-01

0.592E-01    -.291E-06 0.468E-06 -.361E-06  
-.181E+00 0.461E+03 0.202E+03    0.178E+00 -.462E+03 -.202E+03    0.446E-02 0.102E+01 -

.218E+00    0.502E-06 0.181E-06 -.366E-05  
-.294E+00 0.352E+03 -.233E+03    0.298E+00 -.352E+03 0.233E+03    -.207E-02 0.441E+00 -

.300E-01    -.968E-06 0.342E-05 -.273E-05  
0.404E-01 0.351E+03 0.241E+03    -.394E-01 -.351E+03 -.241E+03    0.220E-02 0.410E+00

0.559E-01 0.907E-06 0.515E-06 -.207E-05  
0.509E-01 0.462E+03 -.194E+03 -.570E-01 -.463E+03 0.194E+03 0.390E-02 0.106E+01  
0.232E+00 -.210E-05 0.288E-05 -.272E-05  
-.479E-01 0.210E+03 -.271E+03 0.460E-01 -.210E+03 0.271E+03 -.221E-03 0.939E-01  
0.323E-01 -.449E-06 0.190E-05 -.133E-05  
-.552E+00 0.461E+03 0.202E+03 0.550E+00 -.462E+03 -.202E+03 0.787E-03 0.102E+01 -  
.219E+00 -.423E-06 0.895E-06 -.484E-05  
-.119E+01 0.352E+03 -.233E+03 0.120E+01 -.353E+03 0.233E+03 -.162E-01 0.448E+00 -  
.331E-01 0.781E-06 0.366E-05 -.224E-05  
-.352E+00 0.351E+03 0.241E+03 0.349E+00 -.351E+03 -.241E+03 0.207E-02 0.414E+00  
0.625E-01 0.341E-06 0.859E-06 -.380E-05  
-.412E+00 0.462E+03 -.194E+03 0.426E+00 -.463E+03 0.194E+03 -.114E-01 0.106E+01  
0.230E+00 -.400E-06 0.486E-05 -.369E-05  
-.559E+00 0.210E+03 -.271E+03 0.563E+00 -.210E+03 0.271E+03 -.922E-02 0.922E-01  
0.525E-01 0.459E-06 0.204E-05 -.991E-06  
-.476E+00 0.461E+03 0.202E+03 0.475E+00 -.462E+03 -.202E+03 0.310E-02 0.102E+01 -  
.220E+00 -.836E-06 0.929E-06 -.378E-05  
-.805E+00 0.353E+03 -.234E+03 0.820E+00 -.353E+03 0.234E+03 -.148E-01 0.448E+00 -  
.393E-01 0.171E-05 0.180E-05 0.120E-06  
-.374E+00 0.351E+03 0.241E+03 0.368E+00 -.351E+03 -.241E+03 0.100E-02 0.411E+00  
0.627E-01 -.759E-06 0.122E-05 -.385E-05  
-.595E+00 0.462E+03 -.194E+03 0.608E+00 -.463E+03 0.194E+03 -.169E-01 0.105E+01

0.234E+00 0.199E-05 0.413E-05 -.188E-05  
-.586E+00 0.210E+03 -.272E+03 0.597E+00 -.210E+03 0.272E+03 -.101E-01 0.100E+00  
0.567E-01 0.698E-06 0.665E-06 0.339E-06  
-.797E-02 0.206E+03 0.279E+03 0.113E-01 -.206E+03 -.279E+03 -.358E-02 0.690E-01 -  
.410E-01 -.940E-06 0.869E-06 -.101E-05  
0.670E+00 0.302E+02 0.296E+03 -.665E+00 -.302E+02 -.296E+03 -.467E-02 -.407E-01  
0.774E-02 -.444E-06 0.106E-05 -.435E-06  
-.844E+00 0.144E+03 -.282E+03 0.846E+00 -.144E+03 0.282E+03 -.317E-02 0.138E+00  
0.286E-01 0.136E-07 -.413E-06 0.610E-06  
0.535E+00 -.215E+02 -.285E+03 -.535E+00 0.214E+02 0.285E+03 -.791E-03 0.394E-01  
0.185E-01 -.602E-06 0.120E-06 -.942E-06  
0.502E+00 -.294E+02 0.293E+03 -.499E+00 0.294E+02 -.293E+03 -.551E-02 0.256E-01 -  
.301E-01 0.185E-07 0.638E-06 -.485E-06  
0.525E+00 0.139E+03 0.289E+03 -.525E+00 -.139E+03 -.289E+03 0.180E-02 0.104E+00 -  
.246E-01 -.721E-06 0.102E-05 -.146E-06  
-.126E+01 0.364E+02 -.287E+03 0.126E+01 -.364E+02 0.287E+03 0.127E-03 -.672E-02  
0.137E-01 -.560E-06 -.199E-06 -.474E-06  
0.167E+01 -.130E+03 -.271E+03 -.169E+01 0.130E+03 0.271E+03 0.106E-01 -.872E-01  
0.371E-01 -.665E-06 0.368E-06 -.150E-05  
0.397E+00 0.207E+03 0.280E+03 -.395E+00 -.207E+03 -.280E+03 0.699E-03 0.698E-01 -  
.369E-01 -.432E-06 0.103E-05 0.341E-06  
0.918E+00 0.312E+02 0.296E+03 -.922E+00 -.311E+02 -.296E+03 0.221E-02 -.408E-01

0.124E-01    -.247E-06 0.120E-05 -.148E-06  
0.133E+01 0.144E+03 -.282E+03    -.133E+01 -.144E+03 0.282E+03    0.499E-02 0.127E+00  
0.279E-01    -.235E-06 -.115E-05 0.830E-06  
0.341E+01 -.200E+02 -.285E+03    -.342E+01 0.199E+02 0.285E+03    0.132E-01 0.421E-01  
0.134E-01    0.501E-06 -.779E-07 -.748E-06  
0.139E+01 -.287E+02 0.294E+03    -.139E+01 0.287E+02 -.294E+03    -.350E-02 0.255E-01 -  
.305E-01    -.377E-06 0.117E-05 -.649E-06  
0.677E+00 0.139E+03 0.290E+03    -.677E+00 -.139E+03 -.290E+03    0.589E-03 0.103E+00 -  
.293E-01    -.489E-07 0.101E-05 0.439E-06  
0.160E+01 0.367E+02 -.287E+03    -.159E+01 -.366E+02 0.287E+03    -.130E-01 -.197E-01  
0.128E-01    -.133E-06 -.601E-06 -.413E-06  
0.610E+01 -.125E+03 -.271E+03    -.612E+01 0.125E+03 0.271E+03    0.216E-01 -.888E-01  
0.145E-01    0.263E-06 0.773E-07 -.976E-06  
0.366E+00 0.207E+03 0.280E+03    -.371E+00 -.207E+03 -.280E+03    0.706E-04 0.687E-01 -  
.363E-01    0.546E-06 0.681E-06 0.232E-06  
-.408E-01 0.319E+02 0.296E+03    0.322E-01 -.318E+02 -.296E+03    0.105E-01 -.360E-01  
0.141E-01    0.244E-06 0.364E-06 0.106E-06  
0.209E+01 0.144E+03 -.281E+03    -.210E+01 -.144E+03 0.281E+03    0.120E-01 0.121E+00  
0.239E-01    -.590E-07 -.835E-07 0.151E-06  
0.302E+01 -.172E+02 -.283E+03    -.304E+01 0.171E+02 0.283E+03    0.242E-01 0.881E-01  
0.600E-01    0.458E-06 0.191E-06 -.468E-06  
0.105E+01 -.272E+02 0.294E+03    -.105E+01 0.272E+02 -.294E+03    0.283E-02 0.245E-01 -

.373E-01    -.386E-06 0.692E-06 -.258E-06  
0.948E-01 0.140E+03 0.290E+03    -.964E-01 -.140E+03 -.290E+03    0.127E-02 0.107E+00 -  
.230E-01    0.755E-06 0.340E-06 -.821E-07  
0.276E+01 0.387E+02 -.286E+03    -.276E+01 -.387E+02 0.286E+03    0.892E-03 -.102E-01  
0.291E-01    0.549E-06 -.117E-06 -.388E-06  
0.593E+01 -.115E+03 -.267E+03    -.608E+01 0.115E+03 0.267E+03    0.154E+00 0.271E-02  
0.128E+00    0.485E-06 -.189E-06 -.358E-06  
-.243E+00 0.207E+03 0.280E+03    0.241E+00 -.207E+03 -.280E+03    0.436E-02 0.720E-01 -  
.385E-01    0.958E-06 0.207E-06 -.101E-05  
-.115E+01 0.314E+02 0.294E+03    0.114E+01 -.314E+02 -.294E+03    0.917E-02 -.309E-01  
0.563E-02    0.405E-06 -.537E-06 0.324E-07  
0.592E+00 0.144E+03 -.281E+03    -.609E+00 -.144E+03 0.281E+03    0.175E-01 0.126E+00  
0.437E-01    0.251E-06 0.794E-06 -.765E-06  
-.941E+00 -.159E+02 -.286E+03    0.933E+00 0.158E+02 0.286E+03    0.602E-02 0.910E-01  
0.798E-01    0.502E-06 0.979E-07 -.536E-06  
-.647E+00 -.265E+02 0.293E+03    0.644E+00 0.265E+02 -.293E+03    0.489E-02 0.236E-01 -  
.268E-01    0.917E-07 -.346E-06 0.361E-06  
-.535E+00 0.139E+03 0.289E+03    0.531E+00 -.139E+03 -.289E+03    0.655E-02 0.114E+00 -  
.212E-01    0.687E-06 -.236E-06 -.106E-05  
0.772E+00 0.407E+02 -.287E+03    -.784E+00 -.407E+02 0.287E+03    0.487E-02 0.234E-02 -  
.193E-01    0.712E-06 0.540E-06 -.546E-06  
-.463E+00 -.113E+03 -.276E+03    0.429E+00 0.113E+03 0.277E+03    0.348E-01 0.608E-01 -

.269E+00 0.291E-06 0.370E-06 -.963E-06  
-.572E+00 0.206E+03 0.279E+03 0.570E+00 -.206E+03 -.279E+03 0.116E-02 0.724E-01 -  
.454E-01 0.441E-06 -.212E-07 -.222E-05  
-.782E+00 0.304E+02 0.294E+03 0.785E+00 -.304E+02 -.294E+03 -.751E-02 -.306E-01 -  
.118E-02 0.265E-06 -.572E-06 -.291E-06  
-.123E+01 0.144E+03 -.281E+03 0.124E+01 -.144E+03 0.281E+03 -.155E-01 0.123E+00  
0.504E-01 -.171E-06 0.169E-05 -.937E-06  
-.365E+01 -.174E+02 -.283E+03 0.368E+01 0.173E+02 0.283E+03 -.306E-01 0.118E+00  
0.579E-01 0.129E-06 0.846E-06 -.494E-06  
-.130E+01 -.277E+02 0.291E+03 0.129E+01 0.277E+02 -.291E+03 -.130E-02 0.342E-01 -  
.217E-01 0.363E-06 -.946E-06 0.486E-06  
-.347E+00 0.139E+03 0.289E+03 0.346E+00 -.139E+03 -.289E+03 0.339E-04 0.112E+00 -  
.145E-01 0.318E-07 -.316E-06 -.168E-05  
-.825E+00 0.400E+02 -.287E+03 0.817E+00 -.400E+02 0.287E+03 0.129E-01 -.721E-02 -  
.185E-01 -.316E-06 0.973E-06 -.545E-06  
-.783E+01 -.119E+03 -.267E+03 0.802E+01 0.119E+03 0.267E+03 -.190E+00 0.442E-02  
0.328E-01 0.617E-06 0.194E-06 -.632E-06  
-.408E+00 0.206E+03 0.279E+03 0.409E+00 -.206E+03 -.279E+03 -.277E-02 0.719E-01 -  
.463E-01 -.585E-06 0.300E-06 -.227E-05  
-.601E-01 0.300E+02 0.294E+03 0.699E-01 -.299E+02 -.294E+03 -.944E-02 -.345E-01  
0.144E-02 -.207E-06 0.215E-06 -.471E-06  
-.206E+01 0.145E+03 -.282E+03 0.207E+01 -.145E+03 0.282E+03 -.189E-01 0.133E+00

0.256E-01 0.195E-06 0.132E-05 -.333E-06  
-.256E+01 -.209E+02 -.285E+03 0.258E+01 0.208E+02 0.285E+03 -.288E-01 0.416E-01  
0.316E-01 -.101E-05 0.687E-06 -.726E-06  
-.549E+00 -.290E+02 0.291E+03 0.553E+00 0.290E+02 -.291E+03 -.281E-02 0.294E-01 -  
.249E-01 0.252E-06 -.367E-06 0.861E-07  
0.606E-01 0.139E+03 0.289E+03 -.607E-01 -.139E+03 -.289E+03 -.305E-03 0.109E+00 -  
.206E-01 -.694E-06 0.287E-06 -.123E-05  
-.289E+01 0.377E+02 -.286E+03 0.290E+01 -.377E+02 0.286E+03 -.145E-01 -.302E-02  
0.208E-01 -.167E-06 0.645E-06 -.457E-06  
-.512E+01 -.128E+03 -.271E+03 0.517E+01 0.128E+03 0.271E+03 -.461E-01 -.855E-01  
0.375E-01 -.100E-05 0.402E-06 -.963E-06  
0.404E+00 -.137E+03 0.280E+03 -.397E+00 0.137E+03 -.280E+03 -.964E-02 -.127E+00 -  
.153E-01 0.494E-06 0.441E-06 -.485E-06  
0.194E+01 -.343E+03 0.233E+03 -.195E+01 0.344E+03 -.233E+03 0.915E-02 -.460E+00 -  
.541E-01 0.141E-06 -.190E-06 -.166E-05  
-.252E+01 -.197E+03 -.259E+03 0.253E+01 0.197E+03 0.259E+03 -.952E-02 -.196E+00  
0.367E-01 -.113E-05 0.945E-06 -.131E-05  
0.691E+01 -.447E+03 -.198E+03 -.693E+01 0.448E+03 0.198E+03 0.948E-02 -.112E+01  
0.874E-01 -.148E-05 -.689E-06 -.748E-06  
-.458E+00 -.451E+03 0.204E+03 0.459E+00 0.452E+03 -.204E+03 -.192E-02 -.108E+01 -  
.112E+00 0.491E-06 0.684E-06 -.415E-06  
0.171E+01 -.203E+03 0.269E+03 -.171E+01 0.203E+03 -.269E+03 -.479E-02 -.924E-01 -

.316E-01 0.874E-07 0.597E-06 -.135E-05  
-.209E+01 -.338E+03 -.222E+03 0.214E+01 0.338E+03 0.222E+03 -.444E-01 -.603E+00  
0.535E-01 -.759E-06 -.844E-07 -.800E-06  
0.219E+01 -.136E+03 0.282E+03 -.218E+01 0.136E+03 -.282E+03 -.639E-02 -.126E+00 -  
.910E-02 -.392E-06 0.809E-06 -.141E-05  
0.672E+01 -.339E+03 0.238E+03 -.670E+01 0.340E+03 -.238E+03 -.129E-01 -.461E+00 -  
.455E-01 -.116E-05 -.460E-06 -.232E-05  
0.678E+01 -.193E+03 -.259E+03 -.679E+01 0.193E+03 0.258E+03 0.111E-01 -.144E+00  
0.632E-01 -.420E-06 0.727E-06 -.132E-05  
0.312E+02 -.427E+03 -.198E+03 -.313E+02 0.428E+03 0.197E+03 0.721E-01 -.974E+00  
0.138E+00 0.515E-07 -.172E-05 0.370E-07  
0.544E+01 -.449E+03 0.209E+03 -.545E+01 0.450E+03 -.209E+03 0.532E-03 -.108E+01 -  
.794E-01 -.707E-06 -.176E-06 -.240E-05  
0.368E+01 -.201E+03 0.272E+03 -.368E+01 0.201E+03 -.272E+03 -.810E-03 -.974E-01 -  
.302E-01 -.875E-06 0.400E-06 -.167E-05  
0.124E+02 -.332E+03 -.223E+03 -.125E+02 0.332E+03 0.223E+03 0.121E+00 -.534E+00  
0.313E-01 -.113E-05 -.994E-06 -.751E-06  
0.219E+01 -.133E+03 0.283E+03 -.219E+01 0.133E+03 -.283E+03 0.448E-03 -.128E+00 -  
.413E-02 -.877E-06 0.280E-06 -.822E-06  
0.492E+01 -.332E+03 0.245E+03 -.488E+01 0.332E+03 -.245E+03 -.321E-01 -.476E+00 -  
.372E-01 -.118E-05 -.811E-06 -.558E-06  
0.112E+02 -.182E+03 -.258E+03 -.112E+02 0.182E+03 0.258E+03 0.470E-01 -.989E-01 -

.105E+00 0.639E-06 0.843E-07 -.454E-06  
0.317E+02 -.399E+03 -.175E+03 -.319E+02 0.401E+03 0.174E+03 0.297E+00 -.143E+01  
0.132E+01 -.244E-05 -.347E-05 -.116E-05  
0.930E+01 -.443E+03 0.219E+03 -.929E+01 0.444E+03 -.219E+03 -.595E-02 -.110E+01 -  
.481E-01 -.157E-05 -.586E-06 -.200E-05  
0.168E+01 -.196E+03 0.273E+03 -.169E+01 0.197E+03 -.273E+03 0.542E-02 -.109E+00 -  
.507E-01 -.915E-06 -.421E-06 -.194E-06  
0.172E+02 -.310E+03 -.216E+03 -.175E+02 0.310E+03 0.216E+03 0.325E+00 -.219E+00  
0.122E+00 -.129E-06 -.147E-05 -.278E-06  
-.104E+01 -.132E+03 0.281E+03 0.103E+01 0.132E+03 -.281E+03 0.102E-01 -.127E+00  
0.439E-03 -.433E-06 -.625E-06 0.732E-06  
-.513E+01 -.332E+03 0.239E+03 0.512E+01 0.332E+03 -.239E+03 0.890E-02 -.495E+00 -  
.415E-01 -.581E-07 -.911E-06 0.157E-05  
0.154E+01 -.170E+03 -.261E+03 -.166E+01 0.169E+03 0.261E+03 0.118E+00 0.374E+00 -  
.900E-01 0.932E-06 -.335E-06 -.105E-05  
-.659E+01 -.301E+03 -.189E+03 0.612E+01 0.296E+03 0.185E+03 0.475E+00 0.498E+01  
0.407E+01 -.158E-05 -.839E-05 -.252E-05  
-.631E+00 -.436E+03 0.227E+03 0.628E+00 0.437E+03 -.227E+03 0.164E-02 -.120E+01 -  
.481E-01 -.814E-06 -.534E-06 0.329E-06  
-.303E+01 -.197E+03 0.268E+03 0.301E+01 0.197E+03 -.268E+03 0.146E-01 -.112E+00 -  
.425E-01 -.155E-06 -.946E-06 0.157E-05  
0.319E+01 -.281E+03 -.215E+03 -.513E+01 0.280E+03 0.214E+03 0.192E+01 0.643E+00

0.820E+00    -.176E-05 -.628E-05 -.195E-05  
              -.274E+01 -.134E+03 0.277E+03    0.274E+01 0.134E+03 -.277E+03    0.251E-02 -.123E+00 -  
.182E-01    0.341E-06 -.983E-06 0.155E-05  
              -.600E+01 -.338E+03 0.230E+03    0.600E+01 0.339E+03 -.230E+03    0.113E-01 -.494E+00 -  
.455E-01    0.117E-05 -.303E-06 0.202E-05  
              -.647E+01 -.171E+03 -.257E+03    0.655E+01 0.170E+03 0.257E+03    -.778E-01 0.486E+00  
0.218E-01    0.382E-06 0.846E-06 -.146E-05  
              -.441E+02 -.422E+03 -.184E+03    0.446E+02 0.423E+03 0.183E+03    -.562E+00 -.111E+01  
0.618E+00    0.343E-05 -.483E-05 -.324E-05  
              -.867E+01 -.441E+03 0.211E+03    0.867E+01 0.442E+03 -.211E+03    0.145E-01 -.112E+01 -  
.747E-01    0.870E-06 0.797E-07 0.160E-05  
              -.292E+01 -.201E+03 0.265E+03    0.293E+01 0.201E+03 -.265E+03    -.911E-02 -.110E+00 -  
.201E-01    0.939E-06 -.759E-06 0.182E-05  
              -.144E+02 -.290E+03 -.209E+03    0.164E+02 0.289E+03 0.209E+03    -.198E+01 0.604E+00  
0.787E+00    0.411E-05 -.812E-05 -.406E-05  
              -.138E+01 -.136E+03 0.277E+03    0.139E+01 0.136E+03 -.277E+03    -.101E-01 -.125E+00 -  
.236E-01    0.821E-06 -.460E-06 0.970E-06  
              -.278E+01 -.343E+03 0.230E+03    0.276E+01 0.343E+03 -.230E+03    0.236E-01 -.473E+00 -  
.588E-01    0.105E-05 0.157E-06 0.662E-06  
              -.103E+02 -.189E+03 -.258E+03    0.104E+02 0.189E+03 0.258E+03    -.769E-01 -.139E+00 -  
.527E-01    -.300E-06 0.350E-06 -.762E-06  
              -.149E+02 -.446E+03 -.196E+03    0.150E+02 0.447E+03 0.196E+03    -.692E-01 -.113E+01

0.100E+00    -.665E-07 -.757E-06 -.689E-06  
               -.548E+01 -.448E+03 0.204E+03    0.549E+01 0.449E+03 -.203E+03    -.467E-02 -.109E+01 -  
 .125E+00    0.162E-05 0.899E-06 0.150E-05  
               -.905E+00 -.203E+03 0.267E+03    0.914E+00 0.203E+03 -.267E+03    -.903E-02 -.102E+00 -  
 .313E-01    0.899E-06 0.531E-08 0.422E-06  
               -.162E+02 -.329E+03 -.218E+03    0.166E+02 0.329E+03 0.218E+03    -.359E+00 -.480E+00  
 0.423E-01    0.671E-06 -.138E-05 -.135E-05  
               -.400E+01 -.259E+03 -.198E+03    0.312E+01 0.252E+03 0.193E+03    0.973E+00 0.785E+01  
 0.479E+01    -.193E-05 0.556E-05 0.317E-05  
               0.531E+02 -.518E+03 -.137E+03    -.541E+02 0.522E+03 0.141E+03    0.106E+01 -.396E+01 -  
 .382E+01    -.259E-05 0.519E-05 -.679E-06  
               -.461E+02 -.582E+03 -.442E+03    0.517E+02 0.632E+03 0.475E+03    -.571E+01 -.505E+02 -  
 .334E+02    0.193E-05 0.310E-04 0.127E-04  
 -----  
               0.420E+01 0.274E+02 0.216E+02    -.327E-12 -.784E-11 0.153E-11    -.425E+01 -.273E+02 -  
 .216E+02    -.315E-05 0.506E-04 -.774E-04

POSITION

TOTAL-FORCE (eV/Angst)

-----

|         |         |         |           |          |           |
|---------|---------|---------|-----------|----------|-----------|
| 1.24575 | 4.02870 | 5.43979 | 0.000054  | 0.001064 | -0.000442 |
| 1.21024 | 4.07581 | 8.43726 | -0.000976 | 0.002690 | -0.001097 |

|          |          |         |           |           |           |
|----------|----------|---------|-----------|-----------|-----------|
| 3.70862  | 4.02890  | 5.43965 | 0.000326  | 0.001936  | -0.001128 |
| 3.67998  | 4.07733  | 8.43690 | -0.004014 | -0.000341 | -0.002856 |
| 6.17157  | 4.02854  | 5.43942 | 0.000016  | -0.000090 | -0.001783 |
| 6.14482  | 4.08292  | 8.43295 | -0.002808 | -0.003224 | -0.003132 |
| 8.63513  | 4.02801  | 5.43869 | 0.000799  | -0.000392 | -0.002029 |
| 8.60339  | 4.08732  | 8.43089 | -0.000112 | -0.001102 | -0.002138 |
| 11.09928 | 4.02784  | 5.43885 | 0.000888  | 0.002023  | -0.002739 |
| 11.06021 | 4.08619  | 8.43099 | -0.001729 | 0.000779  | -0.000567 |
| 13.56311 | 4.02807  | 5.43972 | 0.000342  | 0.001670  | -0.001648 |
| 13.52141 | 4.08047  | 8.43349 | 0.000408  | -0.002176 | 0.000359  |
| 2.44241  | 15.48073 | 8.85224 | -0.000604 | -0.005358 | 0.002449  |
| 0.01714  | 15.44624 | 5.32469 | 0.000337  | 0.001532  | -0.001250 |
| 4.86040  | 15.47728 | 8.86623 | 0.001458  | 0.000030  | -0.000590 |
| 2.48016  | 15.44854 | 5.27562 | 0.000385  | -0.001203 | -0.000575 |
| 4.94382  | 15.44925 | 5.24869 | 0.001863  | -0.003060 | 0.000347  |
| 12.31531 | 15.48242 | 9.00211 | -0.006101 | 0.000954  | 0.005977  |
| 9.86772  | 15.44556 | 5.34176 | 0.000436  | -0.001164 | 0.000950  |
| 14.76279 | 15.48245 | 8.89951 | -0.006310 | -0.000633 | 0.005587  |
| 12.33384 | 15.44510 | 5.36128 | 0.001337  | -0.003256 | -0.001275 |
| 7.40743  | 15.44616 | 5.26463 | 0.002388  | 0.001393  | 0.001484  |
| 6.44846  | 16.34427 | 7.40648 | -0.003266 | -0.003381 | 0.000178  |
| 8.60064  | 16.47644 | 7.89249 | 0.002228  | 0.002676  | 0.006198  |

|          |         |         |           |           |           |
|----------|---------|---------|-----------|-----------|-----------|
| 1.24544  | 5.11881 | 5.35500 | 0.000951  | 0.000036  | -0.002397 |
| 2.44348  | 5.83889 | 8.62292 | 0.002436  | -0.004353 | 0.001228  |
| 0.01380  | 5.79530 | 5.28573 | 0.002098  | -0.002337 | 0.000461  |
| 1.21063  | 5.16420 | 8.54151 | 0.000281  | -0.000506 | -0.001974 |
| 2.44351  | 7.27931 | 8.74832 | -0.000028 | -0.001285 | -0.000145 |
| 3.70866  | 5.11896 | 5.35390 | -0.000408 | -0.001749 | 0.000390  |
| 4.90800  | 5.84315 | 8.62123 | -0.001057 | 0.003877  | -0.000723 |
| 2.47701  | 5.79561 | 5.28397 | 0.001472  | -0.000488 | -0.002618 |
| 3.67679  | 5.16572 | 8.54000 | -0.000102 | 0.001660  | -0.000116 |
| 4.90764  | 7.28398 | 8.74777 | 0.000602  | -0.000651 | 0.000992  |
| 6.17184  | 5.11860 | 5.35433 | 0.001493  | 0.000243  | 0.000960  |
| 7.37096  | 5.84929 | 8.62094 | -0.000608 | 0.007170  | -0.002452 |
| 4.94029  | 5.79548 | 5.28340 | 0.000623  | -0.002569 | -0.001186 |
| 6.14080  | 5.17108 | 8.53715 | -0.002494 | 0.002481  | 0.002371  |
| 7.37071  | 7.28983 | 8.75132 | -0.002045 | 0.001528  | 0.000108  |
| 8.63543  | 5.11820 | 5.35521 | 0.001245  | 0.001178  | -0.000998 |
| 9.83233  | 5.85166 | 8.62337 | 0.002821  | 0.001050  | -0.001078 |
| 7.40374  | 5.79498 | 5.28512 | 0.003490  | -0.002552 | -0.001348 |
| 8.60194  | 5.17528 | 8.53759 | -0.001910 | -0.000566 | -0.000322 |
| 9.83204  | 7.29110 | 8.75719 | -0.001775 | -0.003001 | -0.002480 |
| 11.09930 | 5.11814 | 5.35578 | -0.000855 | -0.003519 | -0.001295 |
| 12.29449 | 5.84673 | 8.62385 | 0.000020  | 0.005855  | -0.002201 |

|          |          |         |           |           |           |
|----------|----------|---------|-----------|-----------|-----------|
| 9.86750  | 5.79468  | 5.28678 | -0.000723 | -0.000571 | 0.001543  |
| 11.06261 | 5.17409  | 8.53894 | 0.002699  | 0.002554  | -0.000506 |
| 12.29428 | 7.28729  | 8.75533 | -0.004463 | 0.001088  | -0.001550 |
| 13.56278 | 5.11829  | 5.35605 | 0.002666  | 0.000386  | -0.001918 |
| 14.75895 | 5.83988  | 8.62434 | -0.000259 | -0.002618 | -0.002161 |
| 12.33118 | 5.79480  | 5.28692 | -0.004495 | -0.001332 | 0.002584  |
| 13.52535 | 5.16844  | 8.54022 | -0.003446 | 0.003731  | -0.001526 |
| 14.75917 | 7.28012  | 8.75179 | 0.001065  | 0.002519  | -0.000732 |
| 0.01434  | 7.23830  | 5.19017 | 0.000095  | -0.000211 | 0.000084  |
| 1.24689  | 9.38061  | 5.13160 | 0.000568  | -0.001877 | 0.000007  |
| 1.21085  | 7.98059  | 8.79588 | -0.000940 | -0.000442 | 0.001554  |
| 2.44214  | 10.12243 | 8.87141 | -0.000798 | 0.003823  | -0.005009 |
| 0.01532  | 10.08686 | 5.14049 | -0.002031 | -0.000114 | -0.002402 |
| 1.24606  | 7.94244  | 5.15775 | 0.002024  | -0.002576 | 0.000822  |
| 1.21082  | 9.41592  | 8.85782 | -0.000957 | 0.004204  | 0.000150  |
| 2.44072  | 11.55513 | 8.88414 | -0.006034 | -0.003278 | 0.001543  |
| 2.47747  | 7.23842  | 5.18585 | 0.002808  | 0.002867  | 0.001319  |
| 3.70997  | 9.38055  | 5.12566 | -0.001076 | -0.003026 | 0.000051  |
| 3.67534  | 7.98360  | 8.79349 | -0.000578 | 0.001053  | 0.000965  |
| 4.90487  | 10.12925 | 8.87518 | 0.000130  | 0.000284  | 0.000049  |
| 2.47867  | 10.08713 | 5.12695 | -0.002250 | 0.001509  | 0.000766  |
| 3.70939  | 7.94242  | 5.15441 | 0.000851  | -0.003988 | -0.001706 |

|          |          |         |           |           |           |
|----------|----------|---------|-----------|-----------|-----------|
| 3.67589  | 9.41970  | 8.85445 | -0.001399 | 0.001795  | -0.000177 |
| 4.90263  | 11.56506 | 8.89086 | -0.000329 | 0.000588  | 0.000956  |
| 4.94085  | 7.23830  | 5.18552 | -0.004695 | 0.002240  | 0.000838  |
| 6.17318  | 9.38002  | 5.13173 | 0.002010  | 0.002059  | 0.001841  |
| 6.13864  | 7.99044  | 8.79647 | 0.002546  | -0.000071 | -0.001678 |
| 7.36780  | 10.13760 | 8.89473 | -0.000670 | 0.003572  | 0.000342  |
| 4.94196  | 10.08682 | 5.12700 | 0.004172  | 0.001490  | -0.001161 |
| 6.17284  | 7.94199  | 5.15766 | -0.000026 | 0.000592  | 0.003029  |
| 6.13939  | 9.42660  | 8.86164 | 0.001004  | -0.000536 | -0.002311 |
| 7.36410  | 11.57721 | 8.92935 | -0.001110 | -0.002819 | 0.004119  |
| 7.40426  | 7.23794  | 5.19012 | 0.002153  | 0.001750  | 0.001085  |
| 8.63700  | 9.37970  | 5.14543 | -0.000559 | 0.002910  | 0.000966  |
| 8.60086  | 7.99568  | 8.80617 | 0.001097  | -0.000002 | -0.000972 |
| 9.83068  | 10.14286 | 8.92842 | -0.002250 | 0.003839  | -0.000957 |
| 7.40553  | 10.08627 | 5.14064 | 0.001256  | -0.003522 | 0.003137  |
| 8.63637  | 7.94166  | 5.16555 | 0.002625  | 0.001834  | -0.001413 |
| 8.60077  | 9.43254  | 8.88532 | -0.005967 | 0.001695  | -0.001265 |
| 9.82927  | 11.58244 | 9.00096 | 0.001265  | 0.000808  | 0.000727  |
| 9.86805  | 7.23787  | 5.19489 | -0.000360 | 0.000083  | -0.000194 |
| 11.10106 | 9.37979  | 5.15156 | -0.003814 | -0.001061 | 0.000676  |
| 11.06331 | 7.99411  | 8.80818 | -0.000282 | -0.001181 | 0.000219  |
| 12.29815 | 10.12943 | 8.90340 | -0.000881 | -0.000743 | 0.001088  |

|          |          |         |           |           |           |
|----------|----------|---------|-----------|-----------|-----------|
| 9.86930  | 10.08593 | 5.15631 | -0.005420 | -0.001383 | 0.001408  |
| 11.10021 | 7.94175  | 5.16862 | -0.000564 | -0.003034 | 0.001385  |
| 11.06206 | 9.43062  | 8.88839 | 0.004636  | 0.001263  | 0.002069  |
| 12.30255 | 11.56557 | 8.94694 | 0.003740  | -0.001427 | -0.000067 |
| 12.33169 | 7.23799  | 5.19447 | -0.001029 | 0.000236  | -0.001742 |
| 13.56437 | 9.38021  | 5.14435 | 0.000760  | 0.001620  | -0.000567 |
| 13.52754 | 7.98555  | 8.80171 | -0.000761 | -0.002331 | -0.003116 |
| 14.76233 | 10.12320 | 8.88285 | -0.005075 | 0.001216  | -0.001615 |
| 12.33257 | 10.08637 | 5.15511 | 0.002642  | 0.000585  | -0.001544 |
| 13.56350 | 7.94214  | 5.16485 | -0.000061 | -0.000861 | -0.000376 |
| 13.52731 | 9.42040  | 8.86925 | -0.000225 | 0.003021  | -0.000681 |
| 14.76430 | 11.55727 | 8.90646 | -0.002336 | -0.001253 | 0.001857  |
| 0.01611  | 11.52516 | 5.16621 | -0.001071 | -0.002604 | 0.000396  |
| 1.24770  | 13.67535 | 5.22209 | 0.001764  | -0.002661 | -0.002501 |
| 1.21217  | 12.26335 | 8.89409 | 0.000370  | -0.000081 | 0.001221  |
| 2.43998  | 14.38728 | 8.86748 | -0.003075 | 0.002563  | 0.000766  |
| 0.01699  | 14.35408 | 5.27295 | -0.000327 | -0.000205 | -0.001892 |
| 1.24794  | 12.22963 | 5.17275 | 0.001089  | 0.000813  | -0.001370 |
| 1.21434  | 13.70818 | 8.88771 | 0.003016  | 0.000706  | 0.003948  |
| 2.47958  | 11.52580 | 5.14547 | -0.001602 | -0.000223 | -0.001472 |
| 3.71218  | 13.67636 | 5.19535 | 0.004752  | 0.000206  | 0.001024  |
| 3.66932  | 12.26248 | 8.88184 | -0.001991 | 0.000140  | -0.000612 |

|          |          |         |           |           |           |
|----------|----------|---------|-----------|-----------|-----------|
| 4.89370  | 14.38589 | 8.86075 | 0.004629  | 0.000135  | -0.002309 |
| 2.48000  | 14.35596 | 5.23149 | 0.001321  | -0.000743 | 0.001756  |
| 3.71150  | 12.23022 | 5.15602 | 0.000923  | -0.004580 | 0.001008  |
| 3.66212  | 13.70366 | 8.87117 | -0.004951 | 0.002529  | -0.000159 |
| 4.94290  | 11.52542 | 5.14351 | -0.000062 | -0.001823 | -0.001597 |
| 6.17627  | 13.67505 | 5.20032 | 0.000946  | 0.000125  | 0.000001  |
| 6.13145  | 12.27911 | 8.90591 | 0.005518  | 0.006837  | 0.004811  |
| 7.36614  | 14.42967 | 8.88203 | 0.004343  | 0.002736  | -0.000856 |
| 4.94347  | 14.35627 | 5.21375 | 0.000062  | -0.001370 | 0.001063  |
| 6.17493  | 12.22917 | 5.16623 | -0.001421 | -0.001040 | 0.001582  |
| 6.11879  | 13.72336 | 8.87765 | 0.004383  | -0.003029 | -0.001538 |
| 7.40625  | 11.52413 | 5.16368 | 0.000919  | -0.003457 | 0.000360  |
| 8.63876  | 13.67323 | 5.24377 | 0.001786  | 0.001504  | -0.001394 |
| 8.58939  | 12.29067 | 9.00208 | 0.000966  | 0.003110  | 0.001504  |
| 9.83855  | 14.39048 | 9.30305 | 0.011745  | 0.046510  | 0.038929  |
| 7.40672  | 14.35386 | 5.23530 | -0.001154 | 0.000368  | -0.000818 |
| 8.63820  | 12.22778 | 5.19800 | 0.000325  | -0.001217 | 0.001077  |
| 8.55571  | 13.73596 | 9.04598 | -0.014064 | -0.018215 | -0.000888 |
| 9.86985  | 11.52338 | 5.18893 | 0.001757  | -0.002097 | -0.000106 |
| 11.10099 | 13.67352 | 5.27669 | 0.003260  | -0.001411 | -0.001015 |
| 11.07378 | 12.27333 | 9.00891 | -0.004762 | 0.005929  | -0.000204 |
| 12.30694 | 14.38896 | 9.00333 | -0.005162 | 0.003234  | -0.000182 |

|          |          |          |           |           |           |
|----------|----------|----------|-----------|-----------|-----------|
| 9.86934  | 14.35300 | 5.29564  | 0.002913  | 0.000733  | 0.000195  |
| 11.10161 | 12.22804 | 5.21650  | -0.001083 | -0.002710 | 0.001054  |
| 11.11464 | 13.70636 | 9.07877  | 0.015910  | -0.012863 | -0.004565 |
| 12.33326 | 11.52411 | 5.18815  | -0.000921 | 0.000202  | 0.000536  |
| 13.56430 | 13.67399 | 5.25995  | 0.001447  | -0.000435 | 0.000049  |
| 13.53626 | 12.26601 | 8.93587  | -0.002470 | 0.004370  | 0.002403  |
| 14.76266 | 14.38906 | 8.90426  | -0.005339 | 0.003387  | 0.003598  |
| 12.33397 | 14.35288 | 5.30710  | 0.002854  | -0.001286 | -0.001722 |
| 13.56505 | 12.22870 | 5.20105  | 0.000149  | 0.000070  | -0.001140 |
| 13.54921 | 13.70690 | 8.94399  | 0.000343  | -0.007058 | -0.000819 |
| 9.91126  | 15.53185 | 9.99472  | 0.097751  | 0.912785  | 0.572189  |
| 7.28864  | 16.40884 | 8.69813  | 0.005422  | 0.000410  | -0.000024 |
| 10.02526 | 16.51865 | 10.64498 | -0.101751 | -0.940125 | -0.597577 |

---

|              |  |  |           |          |           |
|--------------|--|--|-----------|----------|-----------|
| total drift: |  |  | -0.046789 | 0.023688 | -0.022830 |
|--------------|--|--|-----------|----------|-----------|

---

FREE ENERGIE OF THE ION-ELECTRON SYSTEM (eV)

---

free energy TOTEN = -1209.38210678 eV

energy without entropy= -1209.38210678 energy(sigma->0) = -1209.38210678

d Force = -0.6698464E-02[-0.156E-01, 0.223E-02] d Energy = -0.6781810E-02 0.833E-04

d Force = 0.1027351E+02[ 0.102E+02, 0.103E+02] d Ewald = 0.1027376E+02-0.258E-03

---

POTLOK: cpu time 0.1766: real time 0.1829

---

stress matrix after NEB project (eV)

-17.77782 -0.35568 -0.01408

-0.35568 -16.21338 -0.16135

-0.01408 -0.16135 -19.46268

FORCES: max atom, RMS      1.118609      0.128344  
FORCE total and by dimension      1.556090      0.940125  
Stress total and by dimension      30.951989      19.462677

Finite differences progress:

Degree of freedom:    5/ 6

Displacement:            1/ 2

Total:                    9/ 12

LATTYP: Found a simple orthorhombic cell.

ALAT            =      14.7806000000

B/A-ratio    =      1.2466138046

C/A-ratio    =      1.4433717170

Lattice vectors:

A1 = ( -14.7806000000,    0.0000000000,    0.0000000000)

A2 = (    0.0000000000,    0.0000000000, -18.4257000000)

A3 = (    0.0000000000, -21.3339000000,    0.0000000000)

Analysis of symmetry for initial positions (statically):

=====

Subroutine PRICEL returns:

Original cell was already a primitive cell.

Routine SETGRP: Setting up the symmetry group for a  
simple orthorhombic supercell.

Subroutine GETGRP returns: Found 1 space group operations  
(whereof 1 operations were pure point group operations)  
out of a pool of 8 trial point group operations.

The static configuration has the point symmetry C<sub>1</sub>.

Analysis of symmetry for dynamics (positions and initial velocities):

=====

Subroutine PRICEL returns:

Original cell was already a primitive cell.

Routine SETGRP: Setting up the symmetry group for a

simple orthorhombic supercell.

Subroutine GETGRP returns: Found 1 space group operations

(whereof 1 operations were pure point group operations)

out of a pool of 8 trial point group operations.

The dynamic configuration has the point symmetry  $C_1$ .

Analysis of constrained symmetry for selective dynamics:

=====

Subroutine PRICEL returns:

Original cell was already a primitive cell.

Routine SETGRP: Setting up the symmetry group for a

simple orthorhombic supercell.

Subroutine GETGRP returns: Found 1 space group operations

(whereof 1 operations were pure point group operations)

out of a pool of 8 trial point group operations.

The constrained configuration has the point symmetry  $C_1$ .

Analysis of structural, dynamic, and magnetic symmetry:

---

Subroutine PRICEL returns:

Original cell was already a primitive cell.

Routine SETGRP: Setting up the symmetry group for a  
simple orthorhombic supercell.

Subroutine GETGRP returns: Found 1 space group operations

(whereof 1 operations were pure point group operations)

out of a pool of 8 trial point group operations.

The magnetic configuration has the point symmetry C<sub>1</sub> .

Subroutine INISYM returns: Found 1 space group operations

(whereof 1 operations are pure point group operations),

and found 1 'primitive' translations

KPOINTS: KPT-Resolved Value to Generate K-Mesh: 0

Automatic generation of k-mesh.

Space group operators:

| irotn    | det(A)   | alpha    | n_x      | n_y      | n_z      | tau_x    |
|----------|----------|----------|----------|----------|----------|----------|
| tau_y    | tau_z    |          |          |          |          |          |
| 1        | 1.000000 | 0.000000 | 1.000000 | 0.000000 | 0.000000 | 0.000000 |
| 0.000000 | 0.000000 |          |          |          |          |          |

Subroutine IBZKPT returns following result:

=====

Found 1 irreducible k-points:

Following reciprocal coordinates:

| Coordinates |          |          | Weight   |
|-------------|----------|----------|----------|
| 0.000000    | 0.000000 | 0.000000 | 1.000000 |

Following cartesian coordinates:

| Coordinates |          |          | Weight   |
|-------------|----------|----------|----------|
| 0.000000    | 0.000000 | 0.000000 | 1.000000 |

|         |          |           |           |          |
|---------|----------|-----------|-----------|----------|
| WAVPRE: | cpu time | 0.1207:   | real time | 0.1323   |
| FEWALD: | cpu time | 0.0026:   | real time | 0.0026   |
| ORTHCH: | cpu time | 0.9996:   | real time | 1.0027   |
| LOOP+:  | cpu time | 179.6916: | real time | 180.7948 |

----- Iteration 11( 1) -----

|           |          |         |           |        |
|-----------|----------|---------|-----------|--------|
| POTLOK:   | cpu time | 0.1698: | real time | 0.1828 |
| SETDIJ:   | cpu time | 0.0101: | real time | 0.0102 |
| EDDIAG:   | cpu time | 1.9281: | real time | 1.9333 |
| RMM-DIIS: | cpu time | 7.0760: | real time | 7.1233 |
| ORTHCH:   | cpu time | 0.3535: | real time | 0.3542 |

DOS: cpu time 0.0004: real time 0.0004

CHARGE: cpu time 0.5243: real time 0.5261

MIXING: cpu time 0.0044: real time 0.0044

-----

LOOP: cpu time 10.0665: real time 10.1347

eigenvalue-minimisations : 1928

total energy-change (2. order) :-0.1396035E-01 (-0.5072594E+00)

number of electron 518.9999727 magnetization 0.9999998

augmentation part 11.7419922 magnetization 0.0542933

Broyden mixing:

rms(total) = 0.46752E-01 rms(broyden)= 0.46237E-01

rms(prec) = 0.47795E-01

weight for this iteration 100.00

Free energy of the ion-electron system (eV)

-----

alpha Z PSCENC = 233.50077011

Ewald energy TEWEN = 91338.81145283

-Hartree energ DENC = -107342.19431339

-exchange EXHF = 0.00000000

-V(xc)+E(xc) XCENC = 1743.81410388

PAW double counting = 52156.16678093 -52219.07075889

entropy T\*S EENTRO = -0.00000000

eigenvalues EBANDS = -5818.13637168

atomic energy EATOM = 18704.32991668

Solvation Ediel\_sol = 0.00000000

-----

free energy TOTEN = -1202.77841954 eV

energy without entropy = -1202.77841954 energy(sigma->0) = -1202.77841954

-----

----- Iteration 11( 2) -----

POTLOK: cpu time 0.1644: real time 0.1733

SETDIJ: cpu time 0.0101: real time 0.0101

|           |          |          |           |         |
|-----------|----------|----------|-----------|---------|
| EDDIAG:   | cpu time | 1.9264:  | real time | 1.9332  |
| RMM-DIIS: | cpu time | 7.2731:  | real time | 7.3094  |
| ORTHCH:   | cpu time | 0.3545:  | real time | 0.3557  |
| DOS:      | cpu time | 0.0004:  | real time | 0.0004  |
| CHARGE:   | cpu time | 0.5261:  | real time | 0.5278  |
| MIXING:   | cpu time | 0.0047:  | real time | 0.0047  |
| -----     |          |          |           |         |
| LOOP:     | cpu time | 10.2596: | real time | 10.3146 |

eigenvalue-minimisations : 1940

total energy-change (2. order) : 0.1327565E-01 (-0.4068605E-02)

number of electron      518.9999727 magnetization      0.9999998

augmentation part      11.7454916 magnetization      0.0542806

Broyden mixing:

rms(total) = 0.34650E-01      rms(broyden)= 0.34616E-01

rms(prec ) = 0.35838E-01

weight for this iteration      100.00

eigenvalues of (default mixing \* dielectric matrix)

average eigenvalue GAMMA=      1.4081

1.4081

Free energy of the ion-electron system (eV)

-----

alpha Z        PSCENC =        233.50077011

Ewald energy    TEWEN =        91338.81145283

-Hartree energ DENC =   -107343.35362768

-exchange       EXHF =            0.00000000

-V(xc)+E(xc)    XCENC =        1743.83937945

PAW double counting =    52171.18075999   -52234.09583378

entropy T\*S     EENTRO =        -0.00000000

eigenvalues     EBANDS =        -5816.97796147

atomic energy   EATOM =        18704.32991668

Solvation    Ediel\_sol =        0.00000000

-----

free energy     TOTEN =        -1202.76514388 eV

energy without entropy =   -1202.76514388    energy(sigma->0) =   -1202.76514388

-----

----- Iteration 11( 3) -----

|           |          |         |           |        |
|-----------|----------|---------|-----------|--------|
| POTLOK:   | cpu time | 0.1678: | real time | 0.1916 |
| SETDIJ:   | cpu time | 0.0101: | real time | 0.0102 |
| EDDIAG:   | cpu time | 1.9286: | real time | 1.9345 |
| RMM-DIIS: | cpu time | 7.0819: | real time | 7.1057 |
| ORTHCH:   | cpu time | 0.3520: | real time | 0.3529 |
| DOS:      | cpu time | 0.0004: | real time | 0.0004 |
| CHARGE:   | cpu time | 0.5260: | real time | 0.5277 |
| MIXING:   | cpu time | 0.0051: | real time | 0.0051 |

-----

|       |          |          |           |         |
|-------|----------|----------|-----------|---------|
| LOOP: | cpu time | 10.0719: | real time | 10.1280 |
|-------|----------|----------|-----------|---------|

eigenvalue-minimisations : 1925

total energy-change (2. order) : 0.1119737E-02 (-0.5804014E-03)

|                    |             |               |           |
|--------------------|-------------|---------------|-----------|
| number of electron | 518.9999727 | magnetization | 0.9999998 |
|--------------------|-------------|---------------|-----------|

|                   |            |               |           |
|-------------------|------------|---------------|-----------|
| augmentation part | 11.7413595 | magnetization | 0.0542823 |
|-------------------|------------|---------------|-----------|

Broyden mixing:

rms(total) = 0.16260E-01      rms(broyden)= 0.16244E-01

rms(prec ) = 0.17263E-01

weight for this iteration      100.00

eigenvalues of (default mixing \* dielectric matrix)

average eigenvalue GAMMA=    1.4369

2.2705   0.6033

Free energy of the ion-electron system (eV)

-----

alpha Z          PSCENC =          233.50077011

Ewald energy    TEWEN   =          91338.81145283

-Hartree energ DENC   =   -107344.46902143

-exchange       EXHF     =          0.00000000

-V(xc)+E(xc)    XCENC   =          1743.88042326

PAW double counting   =   52184.61219969   -52247.54391286

entropy T\*S     EENTRO =          -0.00000000

eigenvalues     EBANDS =          -5815.88585243

atomic energy   EATOM   =          18704.32991668

Solvation    Ediel\_sol   =          0.00000000

-----

free energy      TOTEN   =          -1202.76402414 eV

energy without entropy = -1202.76402414 energy(sigma->0) = -1202.76402414

-----

----- Iteration 11( 4) -----

|           |          |         |           |        |
|-----------|----------|---------|-----------|--------|
| POTLOK:   | cpu time | 0.1634: | real time | 0.1643 |
| SETDIJ:   | cpu time | 0.0100: | real time | 0.0100 |
| EDDIAG:   | cpu time | 1.9256: | real time | 1.9314 |
| RMM-DIIS: | cpu time | 7.2795: | real time | 7.3003 |
| ORTHCH:   | cpu time | 0.3523: | real time | 0.3532 |
| DOS:      | cpu time | 0.0004: | real time | 0.0004 |
| CHARGE:   | cpu time | 0.5255: | real time | 0.5270 |
| MIXING:   | cpu time | 0.0053: | real time | 0.0053 |

-----

|       |          |          |           |         |
|-------|----------|----------|-----------|---------|
| LOOP: | cpu time | 10.2621: | real time | 10.2921 |
|-------|----------|----------|-----------|---------|

eigenvalue-minimisations : 1939

total energy-change (2. order) : 0.2091509E-03 (-0.8233286E-04)

number of electron      518.9999727 magnetization      0.9999998

augmentation part      11.7415959 magnetization      0.0542785

Broyden mixing:

rms(total) = 0.79721E-02      rms(broyden)= 0.79692E-02

rms(prec ) = 0.87431E-02

weight for this iteration      100.00

eigenvalues of (default mixing \* dielectric matrix)

average eigenvalue GAMMA=      1.3907

2.3223    1.0869    0.7629

Free energy of the ion-electron system (eV)

-----

alpha Z      PSCENC =      233.50077011

Ewald energy      TEWEN =      91338.81145283

-Hartree energ DENC =      -107345.28810157

-exchange      EXHF =      0.00000000

-V(xc)+E(xc)      XCENC =      1743.89099110

PAW double counting = 52195.69279534 -52258.63030835

entropy T\*S EENTRO = -0.00000000

eigenvalues EBANDS = -5815.07133114

atomic energy EATOM = 18704.32991668

Solvation Ediel\_sol = 0.00000000

-----

free energy TOTEN = -1202.76381499 eV

energy without entropy = -1202.76381499 energy(sigma->0) = -1202.76381499

-----

----- Iteration 11( 5) -----

POTLOK: cpu time 0.1647: real time 0.1864

SETDIJ: cpu time 0.0102: real time 0.0103

EDDIAG: cpu time 1.9262: real time 1.9328

|           |          |          |           |         |
|-----------|----------|----------|-----------|---------|
| RMM-DIIS: | cpu time | 7.0458:  | real time | 7.0768  |
| ORTHCH:   | cpu time | 0.3531:  | real time | 0.3543  |
| DOS:      | cpu time | 0.0004:  | real time | 0.0004  |
| CHARGE:   | cpu time | 0.5255:  | real time | 0.5270  |
| MIXING:   | cpu time | 0.0055:  | real time | 0.0055  |
| -----     |          |          |           |         |
| LOOP:     | cpu time | 10.0315: | real time | 10.0935 |

eigenvalue-minimisations : 1921

total energy-change (2. order) : 0.1471304E-03 (-0.2243945E-04)

number of electron      518.9999727 magnetization      0.9999998

augmentation part      11.7427033 magnetization      0.0542733

Broyden mixing:

rms(total) = 0.23511E-02      rms(broyden)= 0.23392E-02

rms(prec ) = 0.26228E-02

weight for this iteration      100.00

eigenvalues of (default mixing \* dielectric matrix)

average eigenvalue GAMMA=      1.4601

2.3840   1.8259   0.8154   0.8154

Free energy of the ion-electron system (eV)

-----

alpha Z        PSCENC =        233.50077011

Ewald energy    TEWEN =        91338.81145283

-Hartree energy DENC =    -107345.41749542

-exchange       EXHF =            0.00000000

-V(xc)+E(xc)    XCENC =        1743.88283543

PAW double counting =    52197.34640408    -52260.28113960

entropy T\*S     EENTRO =        -0.00000000

eigenvalues     EBANDS =        -5814.93641198

atomic energy   EATOM =        18704.32991668

Solvation    Ediel\_sol =        0.00000000

-----

free energy     TOTEN =        -1202.76366786 eV

energy without entropy =    -1202.76366786    energy(sigma->0) =    -1202.76366786

-----

----- Iteration 11( 6) -----

POTLOK: cpu time 0.1648: real time 0.1888  
SETDIJ: cpu time 0.0100: real time 0.0100  
EDDIAG: cpu time 1.9233: real time 1.9296  
RMM-DIIS: cpu time 7.1971: real time 7.2230  
ORTHCH: cpu time 0.3541: real time 0.3552  
DOS: cpu time 0.0004: real time 0.0004  
CHARGE: cpu time 0.5262: real time 0.5276  
MIXING: cpu time 0.0060: real time 0.0060

-----

LOOP: cpu time 10.1820: real time 10.2407

eigenvalue-minimisations : 1932

total energy-change (2. order) :-0.1485787E-04 (-0.2425109E-05)

number of electron 518.9999727 magnetization 0.9999998

augmentation part 11.7429305 magnetization 0.0542711

Broyden mixing:

rms(total) = 0.13297E-02 rms(broyden)= 0.13269E-02

rms(prec ) = 0.15576E-02

weight for this iteration      100.00

eigenvalues of (default mixing \* dielectric matrix)

average eigenvalue GAMMA=    1.4399

2.4881   1.9303   0.7652   1.0079   1.0079

Free energy of the ion-electron system (eV)

-----  
alpha Z          PSCENC =          233.50077011

Ewald energy    TEWEN   =          91338.81145283

-Hartree energ DENC   =   -107345.59018517

-exchange       EXHF     =          0.00000000

-V(xc)+E(xc)    XCENC   =          1743.88093227

PAW double counting   =    52198.50929870   -52261.44314738

entropy T\*S     EENTRO =          -0.00000000

eigenvalues     EBANDS =          -5814.76272076

atomic energy   EATOM   =          18704.32991668

Solvation    Ediel\_sol   =          0.00000000

-----  
free energy      TOTEN   =          -1202.76368272 eV

energy without entropy = -1202.76368272 energy(sigma->0) = -1202.76368272

-----

----- Iteration 11( 7) -----

|           |          |         |           |         |
|-----------|----------|---------|-----------|---------|
| POTLOK:   | cpu time | 0.1655: | real time | 0.1680  |
| SETDIJ:   | cpu time | 0.0100: | real time | 0.0100  |
| EDDIAG:   | cpu time | 1.9258: | real time | 1.9324  |
| RMM-DIIS: | cpu time | 6.9335: | real time | 7.0087  |
| ORTHCH:   | cpu time | 0.3532: | real time | 0.3543  |
| DOS:      | cpu time | 0.0004: | real time | 0.0004  |
| CHARGE:   | cpu time | 0.5252: | real time | 0.5272  |
| MIXING:   | cpu time | 0.0060: | real time | 0.0061  |
| -----     |          |         |           |         |
| LOOP:     | cpu time | 9.9196: | real time | 10.0071 |

eigenvalue-minimisations : 1885

total energy-change (2. order) :-0.2120497E-04 (-0.9287926E-06)

number of electron      518.9999727 magnetization      0.9999998

augmentation part      11.7427965 magnetization      0.0542701

Broyden mixing:

rms(total) = 0.40458E-03      rms(broyden)= 0.40416E-03

rms(prec ) = 0.69916E-03

weight for this iteration      100.00

eigenvalues of (default mixing \* dielectric matrix)

average eigenvalue GAMMA=      1.4023

2.5156   2.0749   1.3369   0.8687   0.8687   0.7490

Free energy of the ion-electron system (eV)

-----

alpha Z      PSCENC =      233.50077011

Ewald energy      TEWEN =      91338.81145283

-Hartree energ DENC =      -107345.73088395

-exchange      EXHF =      0.00000000

-V(xc)+E(xc)      XCENC =      1743.88267934

PAW double counting =      52198.70692097      -52261.64116216

entropy T\*S    EENTRO =        -0.00000000

eigenvalues    EBANDS =        -5814.62339776

atomic energy  EATOM  =        18704.32991668

Solvation    Ediel\_sol  =        0.00000000

-----  
free energy    TOTEN  =        -1202.76370393 eV

energy without entropy =    -1202.76370393    energy(sigma->0) =    -1202.76370393

-----  
----- Iteration    11( 8) -----

POTLOK:    cpu time    0.1646: real time    0.1656

SETDIJ:    cpu time    0.0102: real time    0.0102

EDDIAG:    cpu time    1.9271: real time    1.9339

RMM-DIIS:    cpu time    6.3877: real time    6.4126

ORTHCH:  cpu time     0.3561: real time     0.3574

DOS:  cpu time     0.0004: real time     0.0004

CHARGE:  cpu time     0.5255: real time     0.5273

MIXING:  cpu time     0.0064: real time     0.0064

-----

LOOP:  cpu time     9.3779: real time     9.4137

eigenvalue-minimisations  :  1748

total energy-change (2. order) :-0.2816728E-04  (-0.1962897E-06)

number of electron       518.9999727 magnetization       0.9999998

augmentation part       11.7427740 magnetization       0.0542702

Broyden mixing:

rms(total) = 0.27933E-03     rms(broyden)= 0.27914E-03

rms(prec ) = 0.51649E-03

weight for this iteration     100.00

eigenvalues of (default mixing \* dielectric matrix)

average eigenvalue GAMMA=    1.4507

2.5923  2.5923  1.4959  1.0139  1.0139  0.7842  0.6622

Free energy of the ion-electron system (eV)

---

alpha Z        PSCENC =        233.50077011

Ewald energy    TEWEN =        91338.81145283

-Hartree energ DENC =    -107345.85170468

-exchange       EXHF =            0.00000000

-V(xc)+E(xc)    XCENC =        1743.88345817

PAW double counting =    52198.61144659    -52261.54581402

entropy T\*S     EENTRO =        -0.00000000

eigenvalues     EBANDS =        -5814.50325778

atomic energy   EATOM =        18704.32991668

Solvation    Ediel\_sol =        0.00000000

---

free energy     TOTEN =        -1202.76373209 eV

energy without entropy =    -1202.76373209    energy(sigma->0) =    -1202.76373209

---

----- Iteration 11( 9) -----

POTLOK: cpu time 0.1654: real time 0.1677  
SETDIJ: cpu time 0.0101: real time 0.0101  
EDDIAG: cpu time 1.9242: real time 1.9311  
RMM-DIIS: cpu time 6.2380: real time 6.2600  
ORTHCH: cpu time 0.3520: real time 0.3531  
DOS: cpu time 0.0004: real time 0.0004  
CHARGE: cpu time 0.5251: real time 0.5268  
MIXING: cpu time 0.0068: real time 0.0068

-----

LOOP: cpu time 9.2219: real time 9.2559

eigenvalue-minimisations : 1700

total energy-change (2. order) :-0.3519969E-04 (-0.1238403E-06)

number of electron 518.9999727 magnetization 0.9999998

augmentation part 11.7427993 magnetization 0.0542695

Broyden mixing:

rms(total) = 0.15916E-03 rms(broyden)= 0.15893E-03

rms(prec ) = 0.31052E-03

weight for this iteration      100.00

eigenvalues of (default mixing \* dielectric matrix)

average eigenvalue GAMMA=    1.4811

3.0128  2.6688  1.6522  1.1730  0.9650  0.9650  0.7702  0.6419

Free energy of the ion-electron system (eV)

-----  
alpha Z          PSCENC =          233.50077011

Ewald energy    TEWEN  =          91338.81145283

-Hartree energ DENC  =    -107345.98807195

-exchange       EXHF    =          0.00000000

-V(xc)+E(xc)    XCENC  =          1743.88399131

PAW double counting  =    52198.45359690  -52261.38802211

entropy T\*S     EENTRO =          -0.00000000

eigenvalues     EBANDS =         -5814.36740105

atomic energy   EATOM  =          18704.32991668

Solvation    Ediel\_sol  =          0.00000000

-----  
free energy      TOTEN  =         -1202.76376729 eV

energy without entropy =    -1202.76376729    energy(sigma->0) =    -1202.76376729

-----

----- Iteration 11( 10) -----

|           |          |         |           |        |
|-----------|----------|---------|-----------|--------|
| POTLOK:   | cpu time | 0.1651: | real time | 0.1858 |
| SETDIJ:   | cpu time | 0.0102: | real time | 0.0102 |
| EDDIAG:   | cpu time | 1.9267: | real time | 1.9332 |
| RMM-DIIS: | cpu time | 6.0965: | real time | 6.1170 |
| ORTHCH:   | cpu time | 0.3550: | real time | 0.3560 |
| DOS:      | cpu time | 0.0004: | real time | 0.0004 |
| CHARGE:   | cpu time | 0.5249: | real time | 0.5267 |
| MIXING:   | cpu time | 0.0070: | real time | 0.0070 |
| -----     |          |         |           |        |
| LOOP:     | cpu time | 9.0857: | real time | 9.1362 |

eigenvalue-minimisations : 1658

total energy-change (2. order) :-0.3321566E-04 (-0.1087072E-06)

number of electron      518.9999727 magnetization      0.9999998

augmentation part      11.7428102 magnetization      0.0542689

Broyden mixing:

rms(total) = 0.10453E-03      rms(broyden)= 0.10441E-03

rms(prec ) = 0.18397E-03

weight for this iteration      100.00

eigenvalues of (default mixing \* dielectric matrix)

average eigenvalue GAMMA=      1.5840

4.0125   2.5898   2.0114   1.3371   1.0611   1.0611   0.7765   0.7765   0.6304

Free energy of the ion-electron system (eV)

-----

alpha Z      PSCENC =      233.50077011

Ewald energy      TEWEN =      91338.81145283

-Hartree energ DENC =      -107346.09727616

-exchange      EXHF =      0.00000000

-V(xc)+E(xc)      XCENC =      1743.88448736

PAW double counting =      52198.35956270      -52261.29406630

entropy T\*S      EENTRO =      -0.00000000

eigenvalues EBANDS = -5814.25864772

atomic energy EATOM = 18704.32991668

Solvation Ediel\_sol = 0.00000000

-----  
free energy TOTEN = -1202.76380051 eV

energy without entropy = -1202.76380051 energy(sigma->0) = -1202.76380051

----- Iteration 11( 11) -----

POTLOK: cpu time 0.1662: real time 0.1682

SETDIJ: cpu time 0.0100: real time 0.0101

EDDIAG: cpu time 1.9257: real time 1.9322

RMM-DIIS: cpu time 6.0363: real time 6.0559

ORTHCH: cpu time 0.3557: real time 0.3567

DOS: cpu time 0.0004: real time 0.0004

CHARGE: cpu time 0.5263: real time 0.5280

MIXING: cpu time 0.0075: real time 0.0075

-----

LOOP: cpu time 9.0281: real time 9.0589

eigenvalue-minimisations : 1629

total energy-change (2. order) :-0.2539483E-04 (-0.7765237E-07)

number of electron 518.9999727 magnetization 0.9999998

augmentation part 11.7428097 magnetization 0.0542686

Broyden mixing:

rms(total) = 0.66788E-04 rms(broyden)= 0.66740E-04

rms(prec ) = 0.10746E-03

weight for this iteration 100.00

eigenvalues of (default mixing \* dielectric matrix)

average eigenvalue GAMMA= 1.6499

5.0363 2.5759 2.2235 1.5165 1.1106 0.9762 0.9762 0.7772 0.6868 0.6197

Free energy of the ion-electron system (eV)

-----

alpha Z        PSCENC =        233.50077011  
Ewald energy    TEWEN =        91338.81145283  
  
-Hartree energ DENC =    -107346.17030457  
  
-exchange       EXHF =        0.00000000  
  
-V(xc)+E(xc)   XCENC =        1743.88479468  
  
PAW double counting =    52198.32833234    -52261.26287256  
  
entropy T\*S     EENTRO =        -0.00000000  
  
eigenvalues     EBANDS =        -5814.18591540  
  
atomic energy   EATOM =        18704.32991668  
  
Solvation    Ediel\_sol =        0.00000000

-----

free energy     TOTEN =        -1202.76382590 eV

energy without entropy =    -1202.76382590    energy(sigma->0) =    -1202.76382590

-----

|           |          |         |           |        |
|-----------|----------|---------|-----------|--------|
| POTLOK:   | cpu time | 0.1634: | real time | 0.1747 |
| SETDIJ:   | cpu time | 0.0101: | real time | 0.0101 |
| EDDIAG:   | cpu time | 1.9279: | real time | 1.9347 |
| RMM-DIIS: | cpu time | 5.2972: | real time | 5.3224 |
| ORTHCH:   | cpu time | 0.3527: | real time | 0.3538 |
| DOS:      | cpu time | 0.0004: | real time | 0.0004 |
| CHARGE:   | cpu time | 0.5251: | real time | 0.5270 |
| MIXING:   | cpu time | 0.0079: | real time | 0.0080 |
| -----     |          |         |           |        |
| LOOP:     | cpu time | 8.2847: | real time | 8.3310 |

eigenvalue-minimisations : 1454

total energy-change (2. order) :-0.1046715E-04 (-0.1462887E-07)

number of electron 518.9999727 magnetization 0.9999998

augmentation part 11.7428109 magnetization 0.0542686

Broyden mixing:

rms(total) = 0.44219E-04 rms(broyden)= 0.44202E-04

rms(prec ) = 0.76021E-04

weight for this iteration 100.00

eigenvalues of (default mixing \* dielectric matrix)

average eigenvalue GAMMA= 1.7613

5.9916 2.6741 2.3536 1.8731 1.4048 1.0594 1.0594 0.8774 0.7970 0.6689

0.6153

Free energy of the ion-electron system (eV)

-----  
alpha Z PSCENC = 233.50077011

Ewald energy TEWEN = 91338.81145283

-Hartree energ DENC = -107346.19085949

-exchange EXHF = 0.00000000

-V(xc)+E(xc) XCENC = 1743.88483695

PAW double counting = 52198.33080479 -52261.26533561

entropy T\*S EENTRO = -0.00000000

eigenvalues EBANDS = -5814.16542264

atomic energy EATOM = 18704.32991668

Solvation Ediel\_sol = 0.00000000

-----  
free energy TOTEN = -1202.76383637 eV

energy without entropy = -1202.76383637 energy(sigma->0) = -1202.76383637

-----

----- Iteration 11( 13) -----

|           |          |         |           |        |
|-----------|----------|---------|-----------|--------|
| POTLOK:   | cpu time | 0.1647: | real time | 0.1755 |
| SETDIJ:   | cpu time | 0.0101: | real time | 0.0102 |
| EDDIAG:   | cpu time | 1.9335: | real time | 1.9397 |
| RMM-DIIS: | cpu time | 5.4597: | real time | 5.4895 |
| ORTHCH:   | cpu time | 0.3534: | real time | 0.3542 |
| DOS:      | cpu time | 0.0004: | real time | 0.0004 |
| CHARGE:   | cpu time | 0.5254: | real time | 0.5269 |
| MIXING:   | cpu time | 0.0080: | real time | 0.0081 |
| -----     |          |         |           |        |
| LOOP:     | cpu time | 8.4553: | real time | 8.5046 |

eigenvalue-minimisations : 1485

total energy-change (2. order) :-0.1391149E-04 (-0.1981914E-07)

number of electron      518.9999727 magnetization      0.9999998

augmentation part      11.7428136 magnetization      0.0542686

Broyden mixing:

rms(total) = 0.23425E-04      rms(broyden)= 0.23399E-04

rms(prec ) = 0.40337E-04

weight for this iteration      100.00

eigenvalues of (default mixing \* dielectric matrix)

average eigenvalue GAMMA=      1.7984

6.6416   2.9876   2.5065   2.0272   1.4194   1.0377   1.0377   1.0256   0.8088   0.8088

0.6639   0.6159

Free energy of the ion-electron system (eV)

-----

alpha Z      PSCENC =      233.50077011

Ewald energy      TEWEN =      91338.81145283

-Hartree energ      DENC =      -107346.20835083

-exchange      EXHF =      0.00000000

-V(xc)+E(xc)      XCENC =      1743.88482680

PAW double counting =      52198.34549301      -52261.28000050

entropy T\*S    EENTRO =        -0.00000000

eigenvalues    EBANDS =       -5814.14795839

atomic energy   EATOM =       18704.32991668

Solvation    Ediel\_sol =        0.00000000

-----

free energy    TOTEN =       -1202.76385028 eV

energy without entropy =    -1202.76385028    energy(sigma->0) =    -1202.76385028

-----

----- Iteration    11( 14) -----

POTLOK:    cpu time    0.1649: real time    0.1908

SETDIJ:    cpu time    0.0099: real time    0.0100

EDDIAG:    cpu time    1.9294: real time    1.9363

RMM-DIIS:    cpu time    5.0386: real time    5.0636

ORTHCH: cpu time 0.3521: real time 0.3532

DOS: cpu time 0.0004: real time 0.0004

CHARGE: cpu time 0.5247: real time 0.5263

MIXING: cpu time 0.0086: real time 0.0086

-----

LOOP: cpu time 8.0285: real time 8.0891

eigenvalue-minimisations : 1391

total energy-change (2. order) :-0.5827682E-05 (-0.5813103E-08)

number of electron 518.9999727 magnetization 0.9999998

augmentation part 11.7428130 magnetization 0.0542687

Broyden mixing:

rms(total) = 0.15236E-04 rms(broyden)= 0.15230E-04

rms(prec ) = 0.25468E-04

weight for this iteration 100.00

eigenvalues of (default mixing \* dielectric matrix)

average eigenvalue GAMMA= 1.8367

7.0154 3.3926 2.5447 2.0986 1.5123 1.5123 1.0535 1.0535 0.8571 0.8084

0.7550 0.6573 0.6170

Free energy of the ion-electron system (eV)

-----

alpha Z        PSCENC =        233.50077011

Ewald energy    TEWEN =        91338.81145283

-Hartree energy DENC =    -107346.21358133

-exchange       EXHF =            0.00000000

-V(xc)+E(xc)    XCENC =        1743.88482436

PAW double counting =    52198.35153769    -52261.28604533

entropy T\*S     EENTRO =        -0.00000000

eigenvalues     EBANDS =        -5814.14273112

atomic energy   EATOM =        18704.32991668

Solvation    Ediel\_sol =        0.00000000

-----

free energy     TOTEN =        -1202.76385611 eV

energy without entropy =    -1202.76385611    energy(sigma->0) =    -1202.76385611

-----

----- Iteration 11( 15) -----

|           |          |         |           |        |
|-----------|----------|---------|-----------|--------|
| POTLOK:   | cpu time | 0.1708: | real time | 0.1822 |
| SETDIJ:   | cpu time | 0.0100: | real time | 0.0101 |
| EDDIAG:   | cpu time | 1.9263: | real time | 1.9329 |
| RMM-DIIS: | cpu time | 4.8679: | real time | 4.8973 |
| ORTHCH:   | cpu time | 0.3536: | real time | 0.3548 |
| DOS:      | cpu time | 0.0004: | real time | 0.0004 |
| CHARGE:   | cpu time | 0.5246: | real time | 0.5266 |
| MIXING:   | cpu time | 0.0091: | real time | 0.0092 |

-----

|       |          |         |           |        |
|-------|----------|---------|-----------|--------|
| LOOP: | cpu time | 7.8628: | real time | 7.9133 |
|-------|----------|---------|-----------|--------|

eigenvalue-minimisations : 1354

total energy-change (2. order) :-0.4189937E-05 (-0.3424280E-08)

|                    |             |               |           |
|--------------------|-------------|---------------|-----------|
| number of electron | 518.9999727 | magnetization | 0.9999998 |
|--------------------|-------------|---------------|-----------|

|                   |            |               |           |
|-------------------|------------|---------------|-----------|
| augmentation part | 11.7428135 | magnetization | 0.0542686 |
|-------------------|------------|---------------|-----------|

Broyden mixing:

rms(total) = 0.96529E-05 rms(broyden)= 0.96480E-05

rms(prec ) = 0.15181E-04

weight for this iteration      100.00

eigenvalues of (default mixing \* dielectric matrix)

average eigenvalue GAMMA=    1.9253

7.6011  4.2629  2.5833  2.4548  1.8607  1.4751  1.0742  1.0742  0.9151  0.9151

0.7860  0.6908  0.6182  0.6428

Free energy of the ion-electron system (eV)

-----

alpha Z          PSCENC =          233.50077011

Ewald energy    TEWEN  =          91338.81145283

-Hartree energ DENC  =    -107346.21569737

-exchange        EXHF    =          0.00000000

-V(xc)+E(xc)    XCENC  =          1743.88481343

PAW double counting  =    52198.34920844  -52261.28372019

entropy T\*S     EENTRO =          -0.00000000

eigenvalues     EBANDS =          -5814.14060423

atomic energy    EATOM  =          18704.32991668

Solvation    Ediel\_sol  =          0.00000000

-----

free energy      TOTEN  =          -1202.76386030 eV

energy without entropy = -1202.76386030 energy(sigma->0) = -1202.76386030

-----

----- Iteration 11( 16) -----

|           |          |         |           |        |
|-----------|----------|---------|-----------|--------|
| POTLOK:   | cpu time | 0.1677: | real time | 0.1694 |
| SETDIJ:   | cpu time | 0.0100: | real time | 0.0100 |
| EDDIAG:   | cpu time | 1.9250: | real time | 1.9315 |
| RMM-DIIS: | cpu time | 4.7480: | real time | 4.7700 |
| ORTHCH:   | cpu time | 0.3533: | real time | 0.3544 |
| DOS:      | cpu time | 0.0004: | real time | 0.0004 |
| CHARGE:   | cpu time | 0.5250: | real time | 0.5269 |
| MIXING:   | cpu time | 0.0093: | real time | 0.0094 |

-----

|       |          |         |           |        |
|-------|----------|---------|-----------|--------|
| LOOP: | cpu time | 7.7386: | real time | 7.7721 |
|-------|----------|---------|-----------|--------|

eigenvalue-minimisations : 1286

total energy-change (2. order) :-0.1734195E-05 (-0.1400021E-08)

number of electron      518.9999727 magnetization      0.9999998

augmentation part      11.7428137 magnetization      0.0542686

Broyden mixing:

rms(total) = 0.60669E-05      rms(broyden)= 0.60648E-05

rms(prec ) = 0.96114E-05

weight for this iteration      100.00

eigenvalues of (default mixing \* dielectric matrix)

average eigenvalue GAMMA=      1.9276

7.8365 4.6311 2.5968 2.5968 1.9427 1.2998 1.2998 1.0709 1.0709 0.9689

0.8519 0.8098 0.6835 0.6182 0.6358

Free energy of the ion-electron system (eV)

-----

alpha Z      PSCENC =      233.50077011

Ewald energy      TEWEN =      91338.81145283

-Hartree energ DENC =      -107346.21639739

-exchange      EXHF =      0.00000000

-V(xc)+E(xc) XCENC = 1743.88480903

PAW double counting = 52198.34571316 -52261.28022835

entropy T\*S EENTRO = -0.00000000

eigenvalues EBANDS = -5814.13989811

atomic energy EATOM = 18704.32991668

Solvation Ediel\_sol = 0.00000000

-----

free energy TOTEN = -1202.76386203 eV

energy without entropy = -1202.76386203 energy(sigma->0) = -1202.76386203

-----

----- Iteration 11( 17) -----

POTLOK: cpu time 0.1638: real time 0.1662

SETDIJ: cpu time 0.0101: real time 0.0101

|           |          |         |           |        |
|-----------|----------|---------|-----------|--------|
| EDDIAG:   | cpu time | 1.9289: | real time | 1.9352 |
| RMM-DIIS: | cpu time | 4.5340: | real time | 4.5553 |
| ORTHCH:   | cpu time | 0.3514: | real time | 0.3523 |
| DOS:      | cpu time | 0.0004: | real time | 0.0005 |
| CHARGE:   | cpu time | 0.5246: | real time | 0.5266 |
| MIXING:   | cpu time | 0.0098: | real time | 0.0098 |
| -----     |          |         |           |        |
| LOOP:     | cpu time | 7.5230: | real time | 7.5560 |

eigenvalue-minimisations : 1165

total energy-change (2. order) :-0.7511626E-06 (-0.5996803E-09)

|                    |             |               |           |
|--------------------|-------------|---------------|-----------|
| number of electron | 518.9999727 | magnetization | 0.9999998 |
| augmentation part  | 11.7428131  | magnetization | 0.0542686 |

Broyden mixing:

rms(total) = 0.36348E-05      rms(broyden)= 0.36315E-05

rms(prec ) = 0.58046E-05

weight for this iteration      100.00

eigenvalues of (default mixing \* dielectric matrix)

average eigenvalue GAMMA=    1.9674

8.0288   5.1237   2.8682   2.6198   2.1472   1.5912   1.5912   1.0892   1.0892   0.9260

0.9260 0.7777 0.7777 0.6754 0.6172 0.6306

Free energy of the ion-electron system (eV)

-----

alpha Z        PSCENC =        233.50077011

Ewald energy    TEWEN =        91338.81145283

-Hartree energ DENC =    -107346.21653567

-exchange       EXHF =            0.00000000

-V(xc)+E(xc)    XCENC =        1743.88481058

PAW double counting =    52198.34310019    -52261.27761840

entropy T\*S     EENTRO =        -0.00000000

eigenvalues     EBANDS =        -5814.13975911

atomic energy   EATOM =        18704.32991668

Solvation    Ediel\_sol =        0.00000000

-----

free energy     TOTEN =        -1202.76386279 eV

energy without entropy =    -1202.76386279    energy(sigma->0) =    -1202.76386279

-----

----- Iteration 11( 18) -----

|           |          |         |           |        |
|-----------|----------|---------|-----------|--------|
| POTLOK:   | cpu time | 0.1686: | real time | 0.1881 |
| SETDIJ:   | cpu time | 0.0100: | real time | 0.0100 |
| EDDIAG:   | cpu time | 1.9395: | real time | 1.9462 |
| RMM-DIIS: | cpu time | 4.3667: | real time | 4.3882 |
| ORTHCH:   | cpu time | 0.3532: | real time | 0.3544 |
| DOS:      | cpu time | 0.0004: | real time | 0.0004 |
| CHARGE:   | cpu time | 0.5241: | real time | 0.5258 |
| MIXING:   | cpu time | 0.0103: | real time | 0.0104 |

-----

|       |          |         |           |        |
|-------|----------|---------|-----------|--------|
| LOOP: | cpu time | 7.3728: | real time | 7.4235 |
|-------|----------|---------|-----------|--------|

eigenvalue-minimisations : 1100

total energy-change (2. order) :-0.2899615E-06 (-0.2724443E-09)

|                    |             |               |           |
|--------------------|-------------|---------------|-----------|
| number of electron | 518.9999727 | magnetization | 0.9999998 |
|--------------------|-------------|---------------|-----------|

|                   |            |               |           |
|-------------------|------------|---------------|-----------|
| augmentation part | 11.7428130 | magnetization | 0.0542686 |
|-------------------|------------|---------------|-----------|

Broyden mixing:

rms(total) = 0.31070E-05      rms(broyden)= 0.31062E-05

rms(prec ) = 0.41861E-05

weight for this iteration      100.00

eigenvalues of (default mixing \* dielectric matrix)

average eigenvalue GAMMA=    1.9947

8.2133   5.5869   3.2747   2.6180   2.3170   1.8909   1.3075   1.1911   1.1911   1.0145

1.0145   0.8309   0.8309   0.7168   0.6664   0.6168   0.6286

Free energy of the ion-electron system (eV)

-----

alpha Z          PSCENC =          233.50077011

Ewald energy    TEWEN =          91338.81145283

-Hartree energy DENC =   -107346.21658219

-exchange       EXHF =            0.00000000

-V(xc)+E(xc)    XCENC =          1743.88480505

PAW double counting =    52198.34280228   -52261.27732005

entropy T\*S     EENTRO =          -0.00000000

eigenvalues     EBANDS =       -5814.13970778

atomic energy   EATOM =          18704.32991668

Solvation    Ediel\_sol =          0.00000000

-----  
free energy    TOTEN    =    -1202.76386308 eV

energy without entropy =    -1202.76386308    energy(sigma->0) =    -1202.76386308

----- Iteration    11( 19) -----

|           |          |         |           |        |
|-----------|----------|---------|-----------|--------|
| POTLOK:   | cpu time | 0.1678: | real time | 0.1699 |
| SETDIJ:   | cpu time | 0.0101: | real time | 0.0101 |
| EDDIAG:   | cpu time | 1.9317: | real time | 1.9373 |
| RMM-DIIS: | cpu time | 4.1706: | real time | 4.1963 |
| ORTHCH:   | cpu time | 0.3512: | real time | 0.3523 |
| DOS:      | cpu time | 0.0004: | real time | 0.0004 |
| CHARGE:   | cpu time | 0.5241: | real time | 0.5257 |
| MIXING:   | cpu time | 0.0110: | real time | 0.0110 |

-----  
LOOP:  cpu time    7.1668: real time    7.2030

eigenvalue-minimisations :   987

total energy-change (2. order) :-0.1001972E-06  (-0.1413989E-09)

number of electron       518.9999727 magnetization       0.9999998

augmentation part       11.7428133 magnetization       0.0542686

Broyden mixing:

rms(total) = 0.13195E-05       rms(broyden)= 0.13177E-05

rms(prec ) = 0.20795E-05

weight for this iteration       100.00

eigenvalues of (default mixing \* dielectric matrix)

average eigenvalue GAMMA=    2.0119

8.4292  5.8293  3.6691  2.6084  2.3082  2.1372  1.4434  1.4434  1.0968  1.0968

0.9581  0.9581  0.8215  0.8215  0.6854  0.6618  0.6183  0.6282

Free energy of the ion-electron system (eV)

-----  
alpha Z        PSCENC =       233.50077011

Ewald energy   TEWEN  =       91338.81145283

-Hartree energ DENC = -107346.21655662

-exchange EXHF = 0.00000000

-V(xc)+E(xc) XCENC = 1743.88479746

PAW double counting = 52198.34374142 -52261.27825743

entropy T\*S EENTRO = -0.00000000

eigenvalues EBANDS = -5814.13972762

atomic energy EATOM = 18704.32991668

Solvation Ediel\_sol = 0.00000000

-----  
free energy TOTEN = -1202.76386318 eV

energy without entropy = -1202.76386318 energy(sigma->0) = -1202.76386318

----- Iteration 11( 20) -----

|           |          |         |           |        |
|-----------|----------|---------|-----------|--------|
| POTLOK:   | cpu time | 0.1700: | real time | 0.1859 |
| SETDIJ:   | cpu time | 0.0100: | real time | 0.0100 |
| EDDIAG:   | cpu time | 1.9256: | real time | 1.9316 |
| RMM-DIIS: | cpu time | 4.0968: | real time | 4.1086 |
| ORTHCH:   | cpu time | 0.3506: | real time | 0.3516 |
| DOS:      | cpu time | 0.0003: | real time | 0.0003 |
| -----     |          |         |           |        |
| LOOP:     | cpu time | 6.5534: | real time | 6.5881 |

eigenvalue-minimisations : 921

total energy-change (2. order) :-0.4108006E-07 (-0.6682921E-10)

|                    |             |               |           |
|--------------------|-------------|---------------|-----------|
| number of electron | 518.9999727 | magnetization | 0.9999998 |
| augmentation part  | 11.7428133  | magnetization | 0.0542686 |

Free energy of the ion-electron system (eV)

|                     |          |                  |                 |
|---------------------|----------|------------------|-----------------|
| -----               |          |                  |                 |
| alpha Z             | PSCENC = | 233.50077011     |                 |
| Ewald energy        | TEWEN =  | 91338.81145283   |                 |
| -Hartree energ      | DENC =   | -107346.21650784 |                 |
| -exchange           | EXHF =   | 0.00000000       |                 |
| -V(xc)+E(xc)        | XCENC =  | 1743.88479400    |                 |
| PAW double counting | =        | 52198.34451526   | -52261.27903049 |

entropy T\*S    EENTRO =        -0.00000000

eigenvalues    EBANDS =        -5814.13977377

atomic energy   EATOM =        18704.32991668

Solvation    Ediel\_sol =        0.00000000

-----

free energy    TOTEN =        -1202.76386322 eV

energy without entropy =    -1202.76386322    energy(sigma->0) =    -1202.76386322

-----

average (electrostatic) potential at core

the test charge radii are        0.5201   0.6991   1.0621   0.7215

(the norm of the test charge is                    1.0000)

1 -40.7500        2 -40.7478        3 -40.7493        4 -40.7478        5 -40.7501

6 -40.7522        7 -40.7498        8 -40.7576        9 -40.7494        10 -40.7571

11 -40.7508        12 -40.7528        13 -40.6453        14 -40.6927        15 -40.7657

16 -40.6948        17 -40.6890        18 -40.8605        19 -40.6765        20 -40.6625

|              |              |              |              |              |
|--------------|--------------|--------------|--------------|--------------|
| 21 -40.6857  | 22 -40.6590  | 23 -40.0890  | 24 -40.1322  | 25 -57.4558  |
| 26 -57.6667  | 27 -57.6539  | 28 -57.4655  | 29 -57.6598  | 30 -57.4558  |
| 31 -57.6665  | 32 -57.6534  | 33 -57.4635  | 34 -57.6646  | 35 -57.4567  |
| 36 -57.6684  | 37 -57.6535  | 38 -57.4658  | 39 -57.6705  | 40 -57.4557  |
| 41 -57.6725  | 42 -57.6537  | 43 -57.4707  | 44 -57.6853  | 45 -57.4557  |
| 46 -57.6714  | 47 -57.6545  | 48 -57.4709  | 49 -57.6762  | 50 -57.4569  |
| 51 -57.6680  | 52 -57.6542  | 53 -57.4685  | 54 -57.6625  | 55 -57.6335  |
| 56 -57.6595  | 57 -57.6833  | 58 -57.6789  | 59 -57.6631  | 60 -57.6661  |
| 61 -57.6858  | 62 -57.6703  | 63 -57.6338  | 64 -57.6589  | 65 -57.6854  |
| 66 -57.6906  | 67 -57.6614  | 68 -57.6659  | 69 -57.6896  | 70 -57.6967  |
| 71 -57.6333  | 72 -57.6604  | 73 -57.6931  | 74 -57.7179  | 75 -57.6623  |
| 76 -57.6665  | 77 -57.7021  | 78 -57.7469  | 79 -57.6335  | 80 -57.6629  |
| 81 -57.7070  | 82 -57.7486  | 83 -57.6656  | 84 -57.6680  | 85 -57.7338  |
| 86 -57.8382  | 87 -57.6359  | 88 -57.6636  | 89 -57.7089  | 90 -57.7132  |
| 91 -57.6703  | 92 -57.6683  | 93 -57.7384  | 94 -57.7552  | 95 -57.6343  |
| 96 -57.6618  | 97 -57.6924  | 98 -57.6865  | 99 -57.6675  | 100 -57.6670 |
| 101 -57.7039 | 102 -57.6815 | 103 -57.6568 | 104 -57.6273 | 105 -57.6408 |
| 106 -57.2839 | 107 -57.3843 | 108 -57.6278 | 109 -57.5921 | 110 -57.6558 |
| 111 -57.6273 | 112 -57.6375 | 113 -57.3025 | 114 -57.3899 | 115 -57.6270 |
| 116 -57.5941 | 117 -57.6550 | 118 -57.6192 | 119 -57.6936 | 120 -57.6756 |
| 121 -57.3837 | 122 -57.6259 | 123 -57.7044 | 124 -57.6560 | 125 -57.6219 |
| 126 -57.8291 | 127 -58.3131 | 128 -57.3572 | 129 -57.6312 | 130 -58.1390 |

|              |              |              |              |              |
|--------------|--------------|--------------|--------------|--------------|
| 131 -57.6640 | 132 -57.6311 | 133 -57.7966 | 134 -57.4091 | 135 -57.3683 |
| 136 -57.6351 | 137 -58.0735 | 138 -57.6604 | 139 -57.6268 | 140 -57.6667 |
| 141 -57.2926 | 142 -57.3745 | 143 -57.6304 | 144 -57.6427 | 145 -60.8816 |
| 146 -57.3171 | 147 -81.3687 |              |              |              |

E-fermi : -2.3242      XC(G=0): -2.7341      alpha+bet : -2.2521

spin component 1

k-point 1 :      0.0000      0.0000      0.0000

| band No. | band energies | occupation |
|----------|---------------|------------|
| 1        | -27.2189      | 1.00000    |
| 2        | -21.5646      | 1.00000    |
| 3        | -21.4682      | 1.00000    |
| 4        | -21.0956      | 1.00000    |
| 5        | -21.0648      | 1.00000    |
| 6        | -21.0110      | 1.00000    |
| 7        | -20.9754      | 1.00000    |
| 8        | -20.9733      | 1.00000    |

|    |          |         |
|----|----------|---------|
| 9  | -20.8878 | 1.00000 |
| 10 | -20.5538 | 1.00000 |
| 11 | -20.4995 | 1.00000 |
| 12 | -20.4084 | 1.00000 |
| 13 | -20.3947 | 1.00000 |
| 14 | -20.1226 | 1.00000 |
| 15 | -19.9726 | 1.00000 |
| 16 | -19.6993 | 1.00000 |
| 17 | -19.6236 | 1.00000 |
| 18 | -19.5959 | 1.00000 |
| 19 | -19.5802 | 1.00000 |
| 20 | -19.5254 | 1.00000 |
| 21 | -19.5236 | 1.00000 |
| 22 | -19.4954 | 1.00000 |
| 23 | -19.4777 | 1.00000 |
| 24 | -19.1081 | 1.00000 |
| 25 | -19.0714 | 1.00000 |
| 26 | -18.9754 | 1.00000 |
| 27 | -18.9616 | 1.00000 |
| 28 | -18.8970 | 1.00000 |
| 29 | -18.7304 | 1.00000 |
| 30 | -18.5010 | 1.00000 |

|    |          |         |
|----|----------|---------|
| 31 | -18.3554 | 1.00000 |
| 32 | -18.2722 | 1.00000 |
| 33 | -18.2489 | 1.00000 |
| 34 | -18.1797 | 1.00000 |
| 35 | -18.1776 | 1.00000 |
| 36 | -18.0766 | 1.00000 |
| 37 | -18.0727 | 1.00000 |
| 38 | -17.5584 | 1.00000 |
| 39 | -17.3101 | 1.00000 |
| 40 | -17.2837 | 1.00000 |
| 41 | -17.2790 | 1.00000 |
| 42 | -17.2067 | 1.00000 |
| 43 | -17.2003 | 1.00000 |
| 44 | -17.1731 | 1.00000 |
| 45 | -17.0192 | 1.00000 |
| 46 | -16.9466 | 1.00000 |
| 47 | -16.9290 | 1.00000 |
| 48 | -16.8899 | 1.00000 |
| 49 | -16.8881 | 1.00000 |
| 50 | -16.8468 | 1.00000 |
| 51 | -16.8384 | 1.00000 |
| 52 | -16.8170 | 1.00000 |

|    |          |         |
|----|----------|---------|
| 53 | -16.8153 | 1.00000 |
| 54 | -16.7262 | 1.00000 |
| 55 | -16.7229 | 1.00000 |
| 56 | -16.1737 | 1.00000 |
| 57 | -15.7263 | 1.00000 |
| 58 | -15.6887 | 1.00000 |
| 59 | -15.6570 | 1.00000 |
| 60 | -15.6330 | 1.00000 |
| 61 | -15.6131 | 1.00000 |
| 62 | -15.5505 | 1.00000 |
| 63 | -15.5467 | 1.00000 |
| 64 | -15.1722 | 1.00000 |
| 65 | -14.8076 | 1.00000 |
| 66 | -14.6046 | 1.00000 |
| 67 | -14.5751 | 1.00000 |
| 68 | -14.5318 | 1.00000 |
| 69 | -14.4952 | 1.00000 |
| 70 | -14.4653 | 1.00000 |
| 71 | -14.4384 | 1.00000 |
| 72 | -14.3302 | 1.00000 |
| 73 | -14.3022 | 1.00000 |
| 74 | -14.2764 | 1.00000 |

|    |          |         |
|----|----------|---------|
| 75 | -14.2685 | 1.00000 |
| 76 | -14.1794 | 1.00000 |
| 77 | -14.1755 | 1.00000 |
| 78 | -13.8882 | 1.00000 |
| 79 | -13.7560 | 1.00000 |
| 80 | -13.5899 | 1.00000 |
| 81 | -13.5452 | 1.00000 |
| 82 | -13.5262 | 1.00000 |
| 83 | -13.4939 | 1.00000 |
| 84 | -13.4425 | 1.00000 |
| 85 | -13.3610 | 1.00000 |
| 86 | -13.3424 | 1.00000 |
| 87 | -13.1847 | 1.00000 |
| 88 | -12.7830 | 1.00000 |
| 89 | -12.7562 | 1.00000 |
| 90 | -12.7240 | 1.00000 |
| 91 | -12.6929 | 1.00000 |
| 92 | -12.6831 | 1.00000 |
| 93 | -12.6201 | 1.00000 |
| 94 | -12.4580 | 1.00000 |
| 95 | -12.4434 | 1.00000 |
| 96 | -12.3784 | 1.00000 |

|     |          |         |
|-----|----------|---------|
| 97  | -12.3216 | 1.00000 |
| 98  | -12.2100 | 1.00000 |
| 99  | -12.2004 | 1.00000 |
| 100 | -12.1621 | 1.00000 |
| 101 | -11.9501 | 1.00000 |
| 102 | -11.6833 | 1.00000 |
| 103 | -11.6285 | 1.00000 |
| 104 | -11.6083 | 1.00000 |
| 105 | -11.5868 | 1.00000 |
| 106 | -11.1284 | 1.00000 |
| 107 | -11.0927 | 1.00000 |
| 108 | -10.8967 | 1.00000 |
| 109 | -10.8851 | 1.00000 |
| 110 | -10.8312 | 1.00000 |
| 111 | -10.7078 | 1.00000 |
| 112 | -10.6834 | 1.00000 |
| 113 | -10.6619 | 1.00000 |
| 114 | -10.6432 | 1.00000 |
| 115 | -10.5865 | 1.00000 |
| 116 | -10.5781 | 1.00000 |
| 117 | -10.5680 | 1.00000 |
| 118 | -10.5642 | 1.00000 |

|     |          |         |
|-----|----------|---------|
| 119 | -10.5233 | 1.00000 |
| 120 | -10.5223 | 1.00000 |
| 121 | -10.5075 | 1.00000 |
| 122 | -10.4997 | 1.00000 |
| 123 | -10.3756 | 1.00000 |
| 124 | -10.2994 | 1.00000 |
| 125 | -10.2576 | 1.00000 |
| 126 | -10.1853 | 1.00000 |
| 127 | -10.1847 | 1.00000 |
| 128 | -10.1611 | 1.00000 |
| 129 | -10.0774 | 1.00000 |
| 130 | -9.8919  | 1.00000 |
| 131 | -9.8661  | 1.00000 |
| 132 | -9.7971  | 1.00000 |
| 133 | -9.7832  | 1.00000 |
| 134 | -9.7675  | 1.00000 |
| 135 | -9.7001  | 1.00000 |
| 136 | -9.4527  | 1.00000 |
| 137 | -9.4238  | 1.00000 |
| 138 | -9.3925  | 1.00000 |
| 139 | -9.3853  | 1.00000 |
| 140 | -9.3787  | 1.00000 |

|     |         |         |
|-----|---------|---------|
| 141 | -9.3665 | 1.00000 |
| 142 | -9.3096 | 1.00000 |
| 143 | -9.3048 | 1.00000 |
| 144 | -9.2985 | 1.00000 |
| 145 | -9.2850 | 1.00000 |
| 146 | -9.2688 | 1.00000 |
| 147 | -9.0897 | 1.00000 |
| 148 | -9.0032 | 1.00000 |
| 149 | -8.9947 | 1.00000 |
| 150 | -8.9571 | 1.00000 |
| 151 | -8.9539 | 1.00000 |
| 152 | -8.7904 | 1.00000 |
| 153 | -8.7426 | 1.00000 |
| 154 | -8.7311 | 1.00000 |
| 155 | -8.7148 | 1.00000 |
| 156 | -8.7058 | 1.00000 |
| 157 | -8.6838 | 1.00000 |
| 158 | -8.6760 | 1.00000 |
| 159 | -8.6648 | 1.00000 |
| 160 | -8.6510 | 1.00000 |
| 161 | -8.5918 | 1.00000 |
| 162 | -8.5797 | 1.00000 |

|     |         |         |
|-----|---------|---------|
| 163 | -8.5731 | 1.00000 |
| 164 | -8.5648 | 1.00000 |
| 165 | -8.4839 | 1.00000 |
| 166 | -8.4537 | 1.00000 |
| 167 | -8.4327 | 1.00000 |
| 168 | -8.3417 | 1.00000 |
| 169 | -8.2941 | 1.00000 |
| 170 | -8.2720 | 1.00000 |
| 171 | -8.2605 | 1.00000 |
| 172 | -8.2300 | 1.00000 |
| 173 | -8.2290 | 1.00000 |
| 174 | -8.1485 | 1.00000 |
| 175 | -8.1420 | 1.00000 |
| 176 | -8.0750 | 1.00000 |
| 177 | -8.0410 | 1.00000 |
| 178 | -8.0231 | 1.00000 |
| 179 | -8.0185 | 1.00000 |
| 180 | -7.9697 | 1.00000 |
| 181 | -7.9610 | 1.00000 |
| 182 | -7.9212 | 1.00000 |
| 183 | -7.8972 | 1.00000 |
| 184 | -7.8820 | 1.00000 |

|     |         |         |
|-----|---------|---------|
| 185 | -7.8689 | 1.00000 |
| 186 | -7.7977 | 1.00000 |
| 187 | -7.7941 | 1.00000 |
| 188 | -7.7450 | 1.00000 |
| 189 | -7.7073 | 1.00000 |
| 190 | -7.6631 | 1.00000 |
| 191 | -7.5961 | 1.00000 |
| 192 | -7.5812 | 1.00000 |
| 193 | -7.5726 | 1.00000 |
| 194 | -7.5435 | 1.00000 |
| 195 | -7.4773 | 1.00000 |
| 196 | -7.4767 | 1.00000 |
| 197 | -7.4253 | 1.00000 |
| 198 | -7.3206 | 1.00000 |
| 199 | -7.2460 | 1.00000 |
| 200 | -7.1617 | 1.00000 |
| 201 | -7.0639 | 1.00000 |
| 202 | -7.0390 | 1.00000 |
| 203 | -7.0245 | 1.00000 |
| 204 | -7.0098 | 1.00000 |
| 205 | -6.9929 | 1.00000 |
| 206 | -6.9860 | 1.00000 |

|     |         |         |
|-----|---------|---------|
| 207 | -6.9719 | 1.00000 |
| 208 | -6.8636 | 1.00000 |
| 209 | -6.8174 | 1.00000 |
| 210 | -6.7984 | 1.00000 |
| 211 | -6.7899 | 1.00000 |
| 212 | -6.7287 | 1.00000 |
| 213 | -6.6847 | 1.00000 |
| 214 | -6.4669 | 1.00000 |
| 215 | -6.4216 | 1.00000 |
| 216 | -6.3925 | 1.00000 |
| 217 | -6.3878 | 1.00000 |
| 218 | -6.3703 | 1.00000 |
| 219 | -6.3686 | 1.00000 |
| 220 | -6.3134 | 1.00000 |
| 221 | -6.3037 | 1.00000 |
| 222 | -6.2335 | 1.00000 |
| 223 | -6.2265 | 1.00000 |
| 224 | -6.2259 | 1.00000 |
| 225 | -6.0740 | 1.00000 |
| 226 | -6.0340 | 1.00000 |
| 227 | -5.7893 | 1.00000 |
| 228 | -5.7486 | 1.00000 |

|     |         |         |
|-----|---------|---------|
| 229 | -5.6897 | 1.00000 |
| 230 | -5.6378 | 1.00000 |
| 231 | -5.6338 | 1.00000 |
| 232 | -5.5553 | 1.00000 |
| 233 | -5.5271 | 1.00000 |
| 234 | -5.4642 | 1.00000 |
| 235 | -5.4354 | 1.00000 |
| 236 | -5.1639 | 1.00000 |
| 237 | -5.0551 | 1.00000 |
| 238 | -5.0469 | 1.00000 |
| 239 | -5.0144 | 1.00000 |
| 240 | -4.9851 | 1.00000 |
| 241 | -4.9071 | 1.00000 |
| 242 | -4.8499 | 1.00000 |
| 243 | -4.8185 | 1.00000 |
| 244 | -4.7856 | 1.00000 |
| 245 | -4.6794 | 1.00000 |
| 246 | -4.5689 | 1.00000 |
| 247 | -4.5676 | 1.00000 |
| 248 | -4.5015 | 1.00000 |
| 249 | -4.4421 | 1.00000 |
| 250 | -4.3799 | 1.00000 |

|     |         |         |
|-----|---------|---------|
| 251 | -4.2894 | 1.00000 |
| 252 | -4.2615 | 1.00000 |
| 253 | -4.2090 | 1.00000 |
| 254 | -3.5501 | 1.00000 |
| 255 | -3.3508 | 1.00000 |
| 256 | -3.1949 | 1.00000 |
| 257 | -2.9362 | 1.00000 |
| 258 | -2.8445 | 1.00000 |
| 259 | -2.8198 | 1.00000 |
| 260 | -2.6016 | 1.00000 |
| 261 | -1.9055 | 0.00000 |
| 262 | -1.7630 | 0.00000 |
| 263 | -1.7145 | 0.00000 |
| 264 | -1.3382 | 0.00000 |
| 265 | -1.2748 | 0.00000 |
| 266 | -1.1663 | 0.00000 |
| 267 | -0.7316 | 0.00000 |
| 268 | -0.5807 | 0.00000 |
| 269 | -0.4960 | 0.00000 |
| 270 | -0.3043 | 0.00000 |
| 271 | -0.3021 | 0.00000 |
| 272 | -0.2863 | 0.00000 |

|     |         |         |
|-----|---------|---------|
| 273 | -0.1785 | 0.00000 |
| 274 | -0.0532 | 0.00000 |
| 275 | -0.0452 | 0.00000 |
| 276 | -0.0057 | 0.00000 |
| 277 | 0.0387  | 0.00000 |
| 278 | 0.0892  | 0.00000 |
| 279 | 0.1764  | 0.00000 |
| 280 | 0.2244  | 0.00000 |
| 281 | 0.2517  | 0.00000 |
| 282 | 0.4256  | 0.00000 |
| 283 | 0.4521  | 0.00000 |
| 284 | 0.4852  | 0.00000 |
| 285 | 0.5965  | 0.00000 |
| 286 | 0.6836  | 0.00000 |
| 287 | 0.8191  | 0.00000 |
| 288 | 0.8714  | 0.00000 |
| 289 | 1.0486  | 0.00000 |
| 290 | 1.0895  | 0.00000 |
| 291 | 1.1245  | 0.00000 |
| 292 | 1.1640  | 0.00000 |
| 293 | 1.2242  | 0.00000 |
| 294 | 1.2452  | 0.00000 |

|     |        |         |
|-----|--------|---------|
| 295 | 1.2891 | 0.00000 |
| 296 | 1.3147 | 0.00000 |
| 297 | 1.3481 | 0.00000 |
| 298 | 1.4136 | 0.00000 |
| 299 | 1.4667 | 0.00000 |
| 300 | 1.4837 | 0.00000 |
| 301 | 1.5560 | 0.00000 |
| 302 | 1.5876 | 0.00000 |
| 303 | 1.6300 | 0.00000 |
| 304 | 1.6788 | 0.00000 |
| 305 | 1.7521 | 0.00000 |
| 306 | 1.7648 | 0.00000 |
| 307 | 1.8736 | 0.00000 |
| 308 | 1.8960 | 0.00000 |
| 309 | 1.9075 | 0.00000 |
| 310 | 1.9157 | 0.00000 |
| 311 | 2.1247 | 0.00000 |
| 312 | 2.1856 | 0.00000 |
| 313 | 2.2099 | 0.00000 |
| 314 | 2.2377 | 0.00000 |
| 315 | 2.2769 | 0.00000 |
| 316 | 2.2927 | 0.00000 |

|     |        |         |
|-----|--------|---------|
| 317 | 2.3317 | 0.00000 |
| 318 | 2.3553 | 0.00000 |
| 319 | 2.3741 | 0.00000 |
| 320 | 2.4000 | 0.00000 |
| 321 | 2.4228 | 0.00000 |
| 322 | 2.4312 | 0.00000 |
| 323 | 2.4415 | 0.00000 |
| 324 | 2.4536 | 0.00000 |
| 325 | 2.4621 | 0.00000 |
| 326 | 2.5226 | 0.00000 |
| 327 | 2.5372 | 0.00000 |
| 328 | 2.7010 | 0.00000 |
| 329 | 2.7283 | 0.00000 |
| 330 | 2.7545 | 0.00000 |
| 331 | 2.7577 | 0.00000 |
| 332 | 2.7654 | 0.00000 |
| 333 | 2.8172 | 0.00000 |
| 334 | 2.8360 | 0.00000 |
| 335 | 2.8623 | 0.00000 |
| 336 | 2.8914 | 0.00000 |
| 337 | 2.9242 | 0.00000 |
| 338 | 2.9470 | 0.00000 |

|     |        |         |
|-----|--------|---------|
| 339 | 2.9793 | 0.00000 |
| 340 | 3.0060 | 0.00000 |
| 341 | 3.0346 | 0.00000 |
| 342 | 3.0453 | 0.00000 |
| 343 | 3.0663 | 0.00000 |
| 344 | 3.0861 | 0.00000 |
| 345 | 3.1490 | 0.00000 |
| 346 | 3.1631 | 0.00000 |
| 347 | 3.1803 | 0.00000 |
| 348 | 3.1924 | 0.00000 |
| 349 | 3.3013 | 0.00000 |
| 350 | 3.3215 | 0.00000 |
| 351 | 3.3519 | 0.00000 |
| 352 | 3.3669 | 0.00000 |
| 353 | 3.3895 | 0.00000 |
| 354 | 3.4320 | 0.00000 |
| 355 | 3.4754 | 0.00000 |
| 356 | 3.4856 | 0.00000 |
| 357 | 3.4888 | 0.00000 |
| 358 | 3.5013 | 0.00000 |
| 359 | 3.6340 | 0.00000 |
| 360 | 3.6733 | 0.00000 |

|     |        |         |
|-----|--------|---------|
| 361 | 3.6857 | 0.00000 |
| 362 | 3.7336 | 0.00000 |
| 363 | 3.7534 | 0.00000 |
| 364 | 3.7600 | 0.00000 |
| 365 | 3.7724 | 0.00000 |
| 366 | 3.7944 | 0.00000 |
| 367 | 3.8132 | 0.00000 |
| 368 | 3.8358 | 0.00000 |
| 369 | 3.8401 | 0.00000 |
| 370 | 3.8533 | 0.00000 |
| 371 | 3.8778 | 0.00000 |
| 372 | 3.8853 | 0.00000 |
| 373 | 3.9110 | 0.00000 |
| 374 | 3.9261 | 0.00000 |
| 375 | 3.9349 | 0.00000 |
| 376 | 3.9582 | 0.00000 |
| 377 | 3.9734 | 0.00000 |
| 378 | 3.9834 | 0.00000 |
| 379 | 4.0163 | 0.00000 |
| 380 | 4.0693 | 0.00000 |
| 381 | 4.1645 | 0.00000 |
| 382 | 4.2473 | 0.00000 |

|     |        |         |
|-----|--------|---------|
| 383 | 4.2579 | 0.00000 |
| 384 | 4.2589 | 0.00000 |
| 385 | 4.2857 | 0.00000 |
| 386 | 4.3138 | 0.00000 |
| 387 | 4.3282 | 0.00000 |
| 388 | 4.3419 | 0.00000 |
| 389 | 4.3723 | 0.00000 |
| 390 | 4.3823 | 0.00000 |
| 391 | 4.4173 | 0.00000 |
| 392 | 4.4448 | 0.00000 |
| 393 | 4.4682 | 0.00000 |
| 394 | 4.4804 | 0.00000 |
| 395 | 4.4887 | 0.00000 |
| 396 | 4.4966 | 0.00000 |
| 397 | 4.5170 | 0.00000 |
| 398 | 4.5516 | 0.00000 |
| 399 | 4.5922 | 0.00000 |
| 400 | 4.6082 | 0.00000 |
| 401 | 4.6279 | 0.00000 |
| 402 | 4.6434 | 0.00000 |
| 403 | 4.6574 | 0.00000 |
| 404 | 4.6803 | 0.00000 |

|     |        |         |
|-----|--------|---------|
| 405 | 4.7044 | 0.00000 |
| 406 | 4.7324 | 0.00000 |
| 407 | 4.7464 | 0.00000 |
| 408 | 4.7670 | 0.00000 |
| 409 | 4.7838 | 0.00000 |
| 410 | 4.7852 | 0.00000 |
| 411 | 4.7978 | 0.00000 |
| 412 | 4.8291 | 0.00000 |
| 413 | 4.8655 | 0.00000 |
| 414 | 4.8738 | 0.00000 |
| 415 | 4.8994 | 0.00000 |
| 416 | 4.9317 | 0.00000 |
| 417 | 4.9839 | 0.00000 |
| 418 | 5.0046 | 0.00000 |
| 419 | 5.0112 | 0.00000 |
| 420 | 5.0355 | 0.00000 |
| 421 | 5.0395 | 0.00000 |
| 422 | 5.0664 | 0.00000 |
| 423 | 5.0819 | 0.00000 |
| 424 | 5.1139 | 0.00000 |
| 425 | 5.1179 | 0.00000 |
| 426 | 5.1374 | 0.00000 |

|     |        |         |
|-----|--------|---------|
| 427 | 5.1411 | 0.00000 |
| 428 | 5.1557 | 0.00000 |
| 429 | 5.1755 | 0.00000 |
| 430 | 5.1855 | 0.00000 |
| 431 | 5.1889 | 0.00000 |
| 432 | 5.2153 | 0.00000 |
| 433 | 5.2370 | 0.00000 |
| 434 | 5.2406 | 0.00000 |
| 435 | 5.2561 | 0.00000 |
| 436 | 5.2911 | 0.00000 |
| 437 | 5.2970 | 0.00000 |
| 438 | 5.3100 | 0.00000 |
| 439 | 5.3320 | 0.00000 |
| 440 | 5.3501 | 0.00000 |
| 441 | 5.3681 | 0.00000 |
| 442 | 5.3756 | 0.00000 |
| 443 | 5.3947 | 0.00000 |
| 444 | 5.4220 | 0.00000 |
| 445 | 5.4538 | 0.00000 |
| 446 | 5.4649 | 0.00000 |
| 447 | 5.4821 | 0.00000 |
| 448 | 5.4947 | 0.00000 |

|     |        |         |
|-----|--------|---------|
| 449 | 5.5214 | 0.00000 |
| 450 | 5.5512 | 0.00000 |
| 451 | 5.5697 | 0.00000 |
| 452 | 5.5759 | 0.00000 |
| 453 | 5.5961 | 0.00000 |
| 454 | 5.6176 | 0.00000 |
| 455 | 5.6600 | 0.00000 |
| 456 | 5.6820 | 0.00000 |
| 457 | 5.7111 | 0.00000 |
| 458 | 5.7232 | 0.00000 |
| 459 | 5.7435 | 0.00000 |
| 460 | 5.7576 | 0.00000 |
| 461 | 5.7824 | 0.00000 |
| 462 | 5.7911 | 0.00000 |
| 463 | 5.7960 | 0.00000 |
| 464 | 5.8023 | 0.00000 |
| 465 | 5.8075 | 0.00000 |
| 466 | 5.8237 | 0.00000 |
| 467 | 5.8444 | 0.00000 |
| 468 | 5.8541 | 0.00000 |
| 469 | 5.8740 | 0.00000 |
| 470 | 5.8830 | 0.00000 |

|     |        |         |
|-----|--------|---------|
| 471 | 5.8877 | 0.00000 |
| 472 | 5.9112 | 0.00000 |
| 473 | 5.9157 | 0.00000 |
| 474 | 5.9431 | 0.00000 |
| 475 | 5.9504 | 0.00000 |
| 476 | 5.9698 | 0.00000 |
| 477 | 5.9740 | 0.00000 |
| 478 | 5.9942 | 0.00000 |
| 479 | 6.0090 | 0.00000 |
| 480 | 6.0545 | 0.00000 |

spin component 2

k-point 1 : 0.0000 0.0000 0.0000

| band No. | band energies | occupation |
|----------|---------------|------------|
| 1        | -27.2123      | 1.00000    |
| 2        | -21.5634      | 1.00000    |
| 3        | -21.4667      | 1.00000    |
| 4        | -21.0938      | 1.00000    |
| 5        | -21.0639      | 1.00000    |
| 6        | -21.0083      | 1.00000    |
| 7        | -20.9740      | 1.00000    |

|    |          |         |
|----|----------|---------|
| 8  | -20.9714 | 1.00000 |
| 9  | -20.8773 | 1.00000 |
| 10 | -20.5508 | 1.00000 |
| 11 | -20.4960 | 1.00000 |
| 12 | -20.3973 | 1.00000 |
| 13 | -20.3851 | 1.00000 |
| 14 | -20.1185 | 1.00000 |
| 15 | -19.9495 | 1.00000 |
| 16 | -19.6966 | 1.00000 |
| 17 | -19.6223 | 1.00000 |
| 18 | -19.5938 | 1.00000 |
| 19 | -19.5737 | 1.00000 |
| 20 | -19.5241 | 1.00000 |
| 21 | -19.5218 | 1.00000 |
| 22 | -19.4728 | 1.00000 |
| 23 | -19.4583 | 1.00000 |
| 24 | -19.1056 | 1.00000 |
| 25 | -19.0690 | 1.00000 |
| 26 | -18.9654 | 1.00000 |
| 27 | -18.9521 | 1.00000 |
| 28 | -18.8923 | 1.00000 |
| 29 | -18.7008 | 1.00000 |

|    |          |         |
|----|----------|---------|
| 30 | -18.4979 | 1.00000 |
| 31 | -18.3483 | 1.00000 |
| 32 | -18.2440 | 1.00000 |
| 33 | -18.2238 | 1.00000 |
| 34 | -18.1744 | 1.00000 |
| 35 | -18.1722 | 1.00000 |
| 36 | -18.0565 | 1.00000 |
| 37 | -18.0532 | 1.00000 |
| 38 | -17.5551 | 1.00000 |
| 39 | -17.2935 | 1.00000 |
| 40 | -17.2831 | 1.00000 |
| 41 | -17.2700 | 1.00000 |
| 42 | -17.2044 | 1.00000 |
| 43 | -17.2033 | 1.00000 |
| 44 | -17.1702 | 1.00000 |
| 45 | -17.0152 | 1.00000 |
| 46 | -16.9376 | 1.00000 |
| 47 | -16.9185 | 1.00000 |
| 48 | -16.8673 | 1.00000 |
| 49 | -16.8663 | 1.00000 |
| 50 | -16.8260 | 1.00000 |
| 51 | -16.8193 | 1.00000 |

|    |          |         |
|----|----------|---------|
| 52 | -16.8140 | 1.00000 |
| 53 | -16.8119 | 1.00000 |
| 54 | -16.7278 | 1.00000 |
| 55 | -16.7219 | 1.00000 |
| 56 | -16.1710 | 1.00000 |
| 57 | -15.7256 | 1.00000 |
| 58 | -15.6542 | 1.00000 |
| 59 | -15.6392 | 1.00000 |
| 60 | -15.6178 | 1.00000 |
| 61 | -15.5633 | 1.00000 |
| 62 | -15.5246 | 1.00000 |
| 63 | -15.5220 | 1.00000 |
| 64 | -15.1685 | 1.00000 |
| 65 | -14.8054 | 1.00000 |
| 66 | -14.6025 | 1.00000 |
| 67 | -14.5575 | 1.00000 |
| 68 | -14.4971 | 1.00000 |
| 69 | -14.4954 | 1.00000 |
| 70 | -14.4613 | 1.00000 |
| 71 | -14.4342 | 1.00000 |
| 72 | -14.3267 | 1.00000 |
| 73 | -14.2943 | 1.00000 |

|    |          |         |
|----|----------|---------|
| 74 | -14.2648 | 1.00000 |
| 75 | -14.2604 | 1.00000 |
| 76 | -14.1613 | 1.00000 |
| 77 | -14.1580 | 1.00000 |
| 78 | -13.8874 | 1.00000 |
| 79 | -13.7536 | 1.00000 |
| 80 | -13.5872 | 1.00000 |
| 81 | -13.5345 | 1.00000 |
| 82 | -13.5151 | 1.00000 |
| 83 | -13.4904 | 1.00000 |
| 84 | -13.4407 | 1.00000 |
| 85 | -13.3405 | 1.00000 |
| 86 | -13.3379 | 1.00000 |
| 87 | -13.1831 | 1.00000 |
| 88 | -12.7765 | 1.00000 |
| 89 | -12.7468 | 1.00000 |
| 90 | -12.7150 | 1.00000 |
| 91 | -12.6744 | 1.00000 |
| 92 | -12.6675 | 1.00000 |
| 93 | -12.6178 | 1.00000 |
| 94 | -12.4454 | 1.00000 |
| 95 | -12.4285 | 1.00000 |

|     |          |         |
|-----|----------|---------|
| 96  | -12.3748 | 1.00000 |
| 97  | -12.3207 | 1.00000 |
| 98  | -12.2054 | 1.00000 |
| 99  | -12.1952 | 1.00000 |
| 100 | -12.1605 | 1.00000 |
| 101 | -11.9472 | 1.00000 |
| 102 | -11.6804 | 1.00000 |
| 103 | -11.6149 | 1.00000 |
| 104 | -11.5890 | 1.00000 |
| 105 | -11.5767 | 1.00000 |
| 106 | -11.1256 | 1.00000 |
| 107 | -11.0907 | 1.00000 |
| 108 | -10.8878 | 1.00000 |
| 109 | -10.8746 | 1.00000 |
| 110 | -10.8282 | 1.00000 |
| 111 | -10.7017 | 1.00000 |
| 112 | -10.6823 | 1.00000 |
| 113 | -10.6586 | 1.00000 |
| 114 | -10.6383 | 1.00000 |
| 115 | -10.5784 | 1.00000 |
| 116 | -10.5709 | 1.00000 |
| 117 | -10.5653 | 1.00000 |

|     |          |         |
|-----|----------|---------|
| 118 | -10.5613 | 1.00000 |
| 119 | -10.5127 | 1.00000 |
| 120 | -10.5116 | 1.00000 |
| 121 | -10.4983 | 1.00000 |
| 122 | -10.4937 | 1.00000 |
| 123 | -10.3747 | 1.00000 |
| 124 | -10.2982 | 1.00000 |
| 125 | -10.2558 | 1.00000 |
| 126 | -10.1816 | 1.00000 |
| 127 | -10.1808 | 1.00000 |
| 128 | -10.1466 | 1.00000 |
| 129 | -10.0753 | 1.00000 |
| 130 | -9.8892  | 1.00000 |
| 131 | -9.8644  | 1.00000 |
| 132 | -9.7914  | 1.00000 |
| 133 | -9.7741  | 1.00000 |
| 134 | -9.7626  | 1.00000 |
| 135 | -9.6984  | 1.00000 |
| 136 | -9.4512  | 1.00000 |
| 137 | -9.4204  | 1.00000 |
| 138 | -9.3809  | 1.00000 |
| 139 | -9.3769  | 1.00000 |

|     |         |         |
|-----|---------|---------|
| 140 | -9.3719 | 1.00000 |
| 141 | -9.3566 | 1.00000 |
| 142 | -9.3073 | 1.00000 |
| 143 | -9.3025 | 1.00000 |
| 144 | -9.2966 | 1.00000 |
| 145 | -9.2854 | 1.00000 |
| 146 | -9.2457 | 1.00000 |
| 147 | -9.0885 | 1.00000 |
| 148 | -8.9998 | 1.00000 |
| 149 | -8.9913 | 1.00000 |
| 150 | -8.9425 | 1.00000 |
| 151 | -8.9396 | 1.00000 |
| 152 | -8.7879 | 1.00000 |
| 153 | -8.7345 | 1.00000 |
| 154 | -8.7288 | 1.00000 |
| 155 | -8.7094 | 1.00000 |
| 156 | -8.7029 | 1.00000 |
| 157 | -8.6668 | 1.00000 |
| 158 | -8.6605 | 1.00000 |
| 159 | -8.6534 | 1.00000 |
| 160 | -8.6502 | 1.00000 |
| 161 | -8.5748 | 1.00000 |

|     |         |         |
|-----|---------|---------|
| 162 | -8.5681 | 1.00000 |
| 163 | -8.5633 | 1.00000 |
| 164 | -8.5459 | 1.00000 |
| 165 | -8.4835 | 1.00000 |
| 166 | -8.4531 | 1.00000 |
| 167 | -8.4311 | 1.00000 |
| 168 | -8.3389 | 1.00000 |
| 169 | -8.2907 | 1.00000 |
| 170 | -8.2704 | 1.00000 |
| 171 | -8.2301 | 1.00000 |
| 172 | -8.2262 | 1.00000 |
| 173 | -8.2243 | 1.00000 |
| 174 | -8.1384 | 1.00000 |
| 175 | -8.1308 | 1.00000 |
| 176 | -8.0718 | 1.00000 |
| 177 | -8.0388 | 1.00000 |
| 178 | -8.0099 | 1.00000 |
| 179 | -8.0046 | 1.00000 |
| 180 | -7.9651 | 1.00000 |
| 181 | -7.9561 | 1.00000 |
| 182 | -7.9171 | 1.00000 |
| 183 | -7.8875 | 1.00000 |

|     |         |         |
|-----|---------|---------|
| 184 | -7.8681 | 1.00000 |
| 185 | -7.8601 | 1.00000 |
| 186 | -7.7889 | 1.00000 |
| 187 | -7.7848 | 1.00000 |
| 188 | -7.7355 | 1.00000 |
| 189 | -7.6756 | 1.00000 |
| 190 | -7.6331 | 1.00000 |
| 191 | -7.5938 | 1.00000 |
| 192 | -7.5734 | 1.00000 |
| 193 | -7.5512 | 1.00000 |
| 194 | -7.5365 | 1.00000 |
| 195 | -7.4693 | 1.00000 |
| 196 | -7.4691 | 1.00000 |
| 197 | -7.4242 | 1.00000 |
| 198 | -7.3197 | 1.00000 |
| 199 | -7.2327 | 1.00000 |
| 200 | -7.1589 | 1.00000 |
| 201 | -7.0521 | 1.00000 |
| 202 | -7.0333 | 1.00000 |
| 203 | -7.0131 | 1.00000 |
| 204 | -6.9820 | 1.00000 |
| 205 | -6.9738 | 1.00000 |

|     |         |         |
|-----|---------|---------|
| 206 | -6.9687 | 1.00000 |
| 207 | -6.9376 | 1.00000 |
| 208 | -6.8599 | 1.00000 |
| 209 | -6.8131 | 1.00000 |
| 210 | -6.7922 | 1.00000 |
| 211 | -6.7847 | 1.00000 |
| 212 | -6.7219 | 1.00000 |
| 213 | -6.6752 | 1.00000 |
| 214 | -6.4636 | 1.00000 |
| 215 | -6.3917 | 1.00000 |
| 216 | -6.3793 | 1.00000 |
| 217 | -6.3750 | 1.00000 |
| 218 | -6.3592 | 1.00000 |
| 219 | -6.3348 | 1.00000 |
| 220 | -6.2998 | 1.00000 |
| 221 | -6.2721 | 1.00000 |
| 222 | -6.2262 | 1.00000 |
| 223 | -6.2248 | 1.00000 |
| 224 | -6.2192 | 1.00000 |
| 225 | -6.0434 | 1.00000 |
| 226 | -6.0054 | 1.00000 |
| 227 | -5.7531 | 1.00000 |

|     |         |         |
|-----|---------|---------|
| 228 | -5.7079 | 1.00000 |
| 229 | -5.6880 | 1.00000 |
| 230 | -5.6324 | 1.00000 |
| 231 | -5.6193 | 1.00000 |
| 232 | -5.5406 | 1.00000 |
| 233 | -5.5199 | 1.00000 |
| 234 | -5.4377 | 1.00000 |
| 235 | -5.4080 | 1.00000 |
| 236 | -5.1419 | 1.00000 |
| 237 | -5.0566 | 1.00000 |
| 238 | -5.0225 | 1.00000 |
| 239 | -5.0187 | 1.00000 |
| 240 | -4.9555 | 1.00000 |
| 241 | -4.8742 | 1.00000 |
| 242 | -4.8508 | 1.00000 |
| 243 | -4.7986 | 1.00000 |
| 244 | -4.7738 | 1.00000 |
| 245 | -4.6489 | 1.00000 |
| 246 | -4.5750 | 1.00000 |
| 247 | -4.5720 | 1.00000 |
| 248 | -4.4716 | 1.00000 |
| 249 | -4.4178 | 1.00000 |

|     |         |         |
|-----|---------|---------|
| 250 | -4.3910 | 1.00000 |
| 251 | -4.2933 | 1.00000 |
| 252 | -4.2227 | 1.00000 |
| 253 | -4.1716 | 1.00000 |
| 254 | -3.5235 | 1.00000 |
| 255 | -3.3053 | 1.00000 |
| 256 | -3.1353 | 1.00000 |
| 257 | -2.9411 | 1.00000 |
| 258 | -2.7954 | 1.00000 |
| 259 | -2.7358 | 1.00000 |
| 260 | -2.0559 | 0.00000 |
| 261 | -1.9115 | 0.00000 |
| 262 | -1.7178 | 0.00000 |
| 263 | -1.6744 | 0.00000 |
| 264 | -1.2798 | 0.00000 |
| 265 | -1.2469 | 0.00000 |
| 266 | -1.1411 | 0.00000 |
| 267 | -0.7105 | 0.00000 |
| 268 | -0.5800 | 0.00000 |
| 269 | -0.5035 | 0.00000 |
| 270 | -0.2772 | 0.00000 |
| 271 | -0.2740 | 0.00000 |

|     |         |         |
|-----|---------|---------|
| 272 | -0.2562 | 0.00000 |
| 273 | -0.1519 | 0.00000 |
| 274 | -0.0532 | 0.00000 |
| 275 | -0.0441 | 0.00000 |
| 276 | 0.0183  | 0.00000 |
| 277 | 0.0440  | 0.00000 |
| 278 | 0.0841  | 0.00000 |
| 279 | 0.2115  | 0.00000 |
| 280 | 0.2594  | 0.00000 |
| 281 | 0.2833  | 0.00000 |
| 282 | 0.4385  | 0.00000 |
| 283 | 0.4571  | 0.00000 |
| 284 | 0.4864  | 0.00000 |
| 285 | 0.6013  | 0.00000 |
| 286 | 0.7038  | 0.00000 |
| 287 | 0.8219  | 0.00000 |
| 288 | 0.8782  | 0.00000 |
| 289 | 1.0567  | 0.00000 |
| 290 | 1.1083  | 0.00000 |
| 291 | 1.1462  | 0.00000 |
| 292 | 1.1787  | 0.00000 |
| 293 | 1.2330  | 0.00000 |

|     |        |         |
|-----|--------|---------|
| 294 | 1.2510 | 0.00000 |
| 295 | 1.3103 | 0.00000 |
| 296 | 1.3206 | 0.00000 |
| 297 | 1.3617 | 0.00000 |
| 298 | 1.4326 | 0.00000 |
| 299 | 1.4776 | 0.00000 |
| 300 | 1.5033 | 0.00000 |
| 301 | 1.5796 | 0.00000 |
| 302 | 1.6044 | 0.00000 |
| 303 | 1.6584 | 0.00000 |
| 304 | 1.6874 | 0.00000 |
| 305 | 1.7594 | 0.00000 |
| 306 | 1.7751 | 0.00000 |
| 307 | 1.8771 | 0.00000 |
| 308 | 1.9015 | 0.00000 |
| 309 | 1.9106 | 0.00000 |
| 310 | 1.9239 | 0.00000 |
| 311 | 2.1408 | 0.00000 |
| 312 | 2.1969 | 0.00000 |
| 313 | 2.2213 | 0.00000 |
| 314 | 2.2565 | 0.00000 |
| 315 | 2.2904 | 0.00000 |

|     |        |         |
|-----|--------|---------|
| 316 | 2.2975 | 0.00000 |
| 317 | 2.3371 | 0.00000 |
| 318 | 2.3627 | 0.00000 |
| 319 | 2.3847 | 0.00000 |
| 320 | 2.4102 | 0.00000 |
| 321 | 2.4301 | 0.00000 |
| 322 | 2.4365 | 0.00000 |
| 323 | 2.4525 | 0.00000 |
| 324 | 2.4595 | 0.00000 |
| 325 | 2.4682 | 0.00000 |
| 326 | 2.5251 | 0.00000 |
| 327 | 2.5431 | 0.00000 |
| 328 | 2.7062 | 0.00000 |
| 329 | 2.7344 | 0.00000 |
| 330 | 2.7546 | 0.00000 |
| 331 | 2.7603 | 0.00000 |
| 332 | 2.7739 | 0.00000 |
| 333 | 2.8313 | 0.00000 |
| 334 | 2.8491 | 0.00000 |
| 335 | 2.8758 | 0.00000 |
| 336 | 2.9027 | 0.00000 |
| 337 | 2.9327 | 0.00000 |

|     |        |         |
|-----|--------|---------|
| 338 | 2.9565 | 0.00000 |
| 339 | 2.9841 | 0.00000 |
| 340 | 3.0076 | 0.00000 |
| 341 | 3.0386 | 0.00000 |
| 342 | 3.0520 | 0.00000 |
| 343 | 3.0719 | 0.00000 |
| 344 | 3.0935 | 0.00000 |
| 345 | 3.1516 | 0.00000 |
| 346 | 3.1716 | 0.00000 |
| 347 | 3.1891 | 0.00000 |
| 348 | 3.2007 | 0.00000 |
| 349 | 3.3070 | 0.00000 |
| 350 | 3.3259 | 0.00000 |
| 351 | 3.3604 | 0.00000 |
| 352 | 3.3704 | 0.00000 |
| 353 | 3.3927 | 0.00000 |
| 354 | 3.4375 | 0.00000 |
| 355 | 3.4807 | 0.00000 |
| 356 | 3.4918 | 0.00000 |
| 357 | 3.4979 | 0.00000 |
| 358 | 3.5078 | 0.00000 |
| 359 | 3.6389 | 0.00000 |

|     |        |         |
|-----|--------|---------|
| 360 | 3.6772 | 0.00000 |
| 361 | 3.6981 | 0.00000 |
| 362 | 3.7393 | 0.00000 |
| 363 | 3.7572 | 0.00000 |
| 364 | 3.7618 | 0.00000 |
| 365 | 3.7774 | 0.00000 |
| 366 | 3.7993 | 0.00000 |
| 367 | 3.8161 | 0.00000 |
| 368 | 3.8429 | 0.00000 |
| 369 | 3.8490 | 0.00000 |
| 370 | 3.8674 | 0.00000 |
| 371 | 3.8818 | 0.00000 |
| 372 | 3.8947 | 0.00000 |
| 373 | 3.9215 | 0.00000 |
| 374 | 3.9378 | 0.00000 |
| 375 | 3.9499 | 0.00000 |
| 376 | 3.9598 | 0.00000 |
| 377 | 3.9828 | 0.00000 |
| 378 | 3.9867 | 0.00000 |
| 379 | 4.0223 | 0.00000 |
| 380 | 4.0786 | 0.00000 |
| 381 | 4.1710 | 0.00000 |

|     |        |         |
|-----|--------|---------|
| 382 | 4.2598 | 0.00000 |
| 383 | 4.2623 | 0.00000 |
| 384 | 4.2700 | 0.00000 |
| 385 | 4.2933 | 0.00000 |
| 386 | 4.3220 | 0.00000 |
| 387 | 4.3348 | 0.00000 |
| 388 | 4.3511 | 0.00000 |
| 389 | 4.3823 | 0.00000 |
| 390 | 4.3872 | 0.00000 |
| 391 | 4.4230 | 0.00000 |
| 392 | 4.4488 | 0.00000 |
| 393 | 4.4733 | 0.00000 |
| 394 | 4.4834 | 0.00000 |
| 395 | 4.4952 | 0.00000 |
| 396 | 4.4996 | 0.00000 |
| 397 | 4.5202 | 0.00000 |
| 398 | 4.5561 | 0.00000 |
| 399 | 4.5953 | 0.00000 |
| 400 | 4.6110 | 0.00000 |
| 401 | 4.6296 | 0.00000 |
| 402 | 4.6468 | 0.00000 |
| 403 | 4.6604 | 0.00000 |

|     |        |         |
|-----|--------|---------|
| 404 | 4.6862 | 0.00000 |
| 405 | 4.7092 | 0.00000 |
| 406 | 4.7382 | 0.00000 |
| 407 | 4.7514 | 0.00000 |
| 408 | 4.7704 | 0.00000 |
| 409 | 4.7874 | 0.00000 |
| 410 | 4.7909 | 0.00000 |
| 411 | 4.8033 | 0.00000 |
| 412 | 4.8338 | 0.00000 |
| 413 | 4.8717 | 0.00000 |
| 414 | 4.8857 | 0.00000 |
| 415 | 4.9048 | 0.00000 |
| 416 | 4.9423 | 0.00000 |
| 417 | 4.9937 | 0.00000 |
| 418 | 5.0100 | 0.00000 |
| 419 | 5.0136 | 0.00000 |
| 420 | 5.0391 | 0.00000 |
| 421 | 5.0444 | 0.00000 |
| 422 | 5.0704 | 0.00000 |
| 423 | 5.0862 | 0.00000 |
| 424 | 5.1174 | 0.00000 |
| 425 | 5.1221 | 0.00000 |

|     |        |         |
|-----|--------|---------|
| 426 | 5.1414 | 0.00000 |
| 427 | 5.1444 | 0.00000 |
| 428 | 5.1718 | 0.00000 |
| 429 | 5.1802 | 0.00000 |
| 430 | 5.1895 | 0.00000 |
| 431 | 5.1937 | 0.00000 |
| 432 | 5.2203 | 0.00000 |
| 433 | 5.2395 | 0.00000 |
| 434 | 5.2439 | 0.00000 |
| 435 | 5.2617 | 0.00000 |
| 436 | 5.2995 | 0.00000 |
| 437 | 5.3043 | 0.00000 |
| 438 | 5.3131 | 0.00000 |
| 439 | 5.3364 | 0.00000 |
| 440 | 5.3541 | 0.00000 |
| 441 | 5.3722 | 0.00000 |
| 442 | 5.3829 | 0.00000 |
| 443 | 5.3972 | 0.00000 |
| 444 | 5.4303 | 0.00000 |
| 445 | 5.4600 | 0.00000 |
| 446 | 5.4717 | 0.00000 |
| 447 | 5.4876 | 0.00000 |

|     |        |         |
|-----|--------|---------|
| 448 | 5.4993 | 0.00000 |
| 449 | 5.5282 | 0.00000 |
| 450 | 5.5685 | 0.00000 |
| 451 | 5.5757 | 0.00000 |
| 452 | 5.5958 | 0.00000 |
| 453 | 5.6082 | 0.00000 |
| 454 | 5.6273 | 0.00000 |
| 455 | 5.6725 | 0.00000 |
| 456 | 5.6928 | 0.00000 |
| 457 | 5.7202 | 0.00000 |
| 458 | 5.7279 | 0.00000 |
| 459 | 5.7478 | 0.00000 |
| 460 | 5.7625 | 0.00000 |
| 461 | 5.7903 | 0.00000 |
| 462 | 5.7942 | 0.00000 |
| 463 | 5.7991 | 0.00000 |
| 464 | 5.8049 | 0.00000 |
| 465 | 5.8209 | 0.00000 |
| 466 | 5.8259 | 0.00000 |
| 467 | 5.8558 | 0.00000 |
| 468 | 5.8616 | 0.00000 |
| 469 | 5.8846 | 0.00000 |

|     |        |         |
|-----|--------|---------|
| 470 | 5.8882 | 0.00000 |
| 471 | 5.8928 | 0.00000 |
| 472 | 5.9106 | 0.00000 |
| 473 | 5.9222 | 0.00000 |
| 474 | 5.9509 | 0.00000 |
| 475 | 5.9548 | 0.00000 |
| 476 | 5.9713 | 0.00000 |
| 477 | 5.9773 | 0.00000 |
| 478 | 5.9910 | 0.00000 |
| 479 | 6.0142 | 0.00000 |
| 480 | 6.0439 | 0.00000 |

-----

soft charge-density along one line, spin component

1

0

1

2

3

4

5

6

7

8

9

total charge-density along one line

soft charge-density along one line, spin component

2

0 1 2 3 4 5 6 7

8 9

total charge-density along one line

pseudopotential strength for first ion, spin component: 1

|        |        |        |        |        |
|--------|--------|--------|--------|--------|
| -2.331 | -4.014 | -0.002 | 0.000  | 0.000  |
| -4.014 | -6.828 | -0.006 | 0.000  | -0.000 |
| -0.002 | -0.006 | -0.336 | -0.000 | 0.000  |
| 0.000  | 0.000  | -0.000 | -0.341 | -0.000 |
| 0.000  | -0.000 | 0.000  | -0.000 | -0.341 |

pseudopotential strength for first ion, spin component: 2

|        |        |        |        |        |
|--------|--------|--------|--------|--------|
| -2.331 | -4.014 | -0.002 | 0.000  | 0.000  |
| -4.014 | -6.828 | -0.006 | 0.000  | -0.000 |
| -0.002 | -0.006 | -0.336 | -0.000 | 0.000  |
| 0.000  | 0.000  | -0.000 | -0.341 | -0.000 |
| 0.000  | -0.000 | 0.000  | -0.000 | -0.341 |

total augmentation occupancy for first ion, spin component: 1

|        |        |        |        |        |
|--------|--------|--------|--------|--------|
| 3.579  | -0.646 | 0.444  | -0.034 | -0.000 |
| -0.646 | 0.130  | -0.082 | 0.006  | 0.000  |
| 0.444  | -0.082 | 0.056  | -0.003 | -0.000 |
| -0.034 | 0.006  | -0.003 | 0.011  | 0.000  |
| -0.000 | 0.000  | -0.000 | 0.000  | 0.007  |

total augmentation occupancy for first ion, spin component:

2

-0.000 0.000 -0.000 0.000 0.000

0.000 -0.000 0.000 -0.000 -0.000

-0.000 0.000 -0.000 -0.000 -0.000

0.000 -0.000 -0.000 -0.000 -0.000

0.000 -0.000 -0.000 -0.000 -0.000

----- aborting loop because EDIFF is reached -----

total charge

| # of ion | s | p | d | tot |
|----------|---|---|---|-----|
|----------|---|---|---|-----|

-----

|   |       |       |       |       |
|---|-------|-------|-------|-------|
| 1 | 0.646 | 0.043 | 0.000 | 0.690 |
|---|-------|-------|-------|-------|

|   |       |       |       |       |
|---|-------|-------|-------|-------|
| 2 | 0.646 | 0.043 | 0.000 | 0.690 |
|---|-------|-------|-------|-------|

|   |       |       |       |       |
|---|-------|-------|-------|-------|
| 3 | 0.646 | 0.043 | 0.000 | 0.690 |
|---|-------|-------|-------|-------|

|   |       |       |       |       |
|---|-------|-------|-------|-------|
| 4 | 0.646 | 0.043 | 0.000 | 0.690 |
|---|-------|-------|-------|-------|

|    |       |       |       |       |
|----|-------|-------|-------|-------|
| 5  | 0.646 | 0.043 | 0.000 | 0.690 |
| 6  | 0.646 | 0.043 | 0.000 | 0.690 |
| 7  | 0.646 | 0.043 | 0.000 | 0.690 |
| 8  | 0.646 | 0.043 | 0.000 | 0.690 |
| 9  | 0.646 | 0.043 | 0.000 | 0.690 |
| 10 | 0.646 | 0.043 | 0.000 | 0.690 |
| 11 | 0.646 | 0.043 | 0.000 | 0.690 |
| 12 | 0.646 | 0.043 | 0.000 | 0.690 |
| 13 | 0.646 | 0.043 | 0.000 | 0.689 |
| 14 | 0.646 | 0.043 | 0.000 | 0.689 |
| 15 | 0.649 | 0.045 | 0.000 | 0.693 |
| 16 | 0.646 | 0.043 | 0.000 | 0.689 |
| 17 | 0.646 | 0.043 | 0.000 | 0.689 |
| 18 | 0.646 | 0.043 | 0.000 | 0.689 |
| 19 | 0.646 | 0.043 | 0.000 | 0.689 |
| 20 | 0.646 | 0.043 | 0.000 | 0.689 |
| 21 | 0.646 | 0.043 | 0.000 | 0.689 |
| 22 | 0.646 | 0.044 | 0.000 | 0.690 |
| 23 | 0.541 | 0.015 | 0.000 | 0.556 |
| 24 | 0.541 | 0.015 | 0.000 | 0.556 |
| 25 | 0.870 | 1.763 | 0.000 | 2.633 |
| 26 | 0.867 | 1.785 | 0.000 | 2.653 |

|    |       |       |       |       |
|----|-------|-------|-------|-------|
| 27 | 0.867 | 1.786 | 0.000 | 2.653 |
| 28 | 0.870 | 1.762 | 0.000 | 2.632 |
| 29 | 0.865 | 1.783 | 0.000 | 2.648 |
| 30 | 0.870 | 1.763 | 0.000 | 2.633 |
| 31 | 0.867 | 1.786 | 0.000 | 2.653 |
| 32 | 0.867 | 1.786 | 0.000 | 2.653 |
| 33 | 0.870 | 1.762 | 0.000 | 2.632 |
| 34 | 0.865 | 1.783 | 0.000 | 2.648 |
| 35 | 0.870 | 1.763 | 0.000 | 2.633 |
| 36 | 0.868 | 1.787 | 0.000 | 2.654 |
| 37 | 0.867 | 1.786 | 0.000 | 2.653 |
| 38 | 0.870 | 1.763 | 0.000 | 2.633 |
| 39 | 0.865 | 1.784 | 0.000 | 2.649 |
| 40 | 0.870 | 1.763 | 0.000 | 2.633 |
| 41 | 0.868 | 1.787 | 0.000 | 2.655 |
| 42 | 0.867 | 1.786 | 0.000 | 2.653 |
| 43 | 0.871 | 1.764 | 0.000 | 2.634 |
| 44 | 0.865 | 1.783 | 0.000 | 2.648 |
| 45 | 0.870 | 1.763 | 0.000 | 2.633 |
| 46 | 0.867 | 1.786 | 0.000 | 2.653 |
| 47 | 0.867 | 1.786 | 0.000 | 2.653 |
| 48 | 0.871 | 1.763 | 0.000 | 2.634 |

|    |       |       |       |       |
|----|-------|-------|-------|-------|
| 49 | 0.865 | 1.783 | 0.000 | 2.648 |
| 50 | 0.870 | 1.763 | 0.000 | 2.633 |
| 51 | 0.867 | 1.786 | 0.000 | 2.653 |
| 52 | 0.867 | 1.786 | 0.000 | 2.653 |
| 53 | 0.870 | 1.762 | 0.000 | 2.632 |
| 54 | 0.865 | 1.784 | 0.000 | 2.648 |
| 55 | 0.865 | 1.784 | 0.000 | 2.649 |
| 56 | 0.865 | 1.786 | 0.000 | 2.651 |
| 57 | 0.866 | 1.787 | 0.000 | 2.653 |
| 58 | 0.866 | 1.790 | 0.000 | 2.656 |
| 59 | 0.865 | 1.786 | 0.000 | 2.651 |
| 60 | 0.866 | 1.786 | 0.000 | 2.651 |
| 61 | 0.866 | 1.788 | 0.000 | 2.654 |
| 62 | 0.867 | 1.791 | 0.000 | 2.658 |
| 63 | 0.865 | 1.784 | 0.000 | 2.649 |
| 64 | 0.865 | 1.786 | 0.000 | 2.651 |
| 65 | 0.866 | 1.787 | 0.000 | 2.652 |
| 66 | 0.865 | 1.788 | 0.000 | 2.653 |
| 67 | 0.865 | 1.786 | 0.000 | 2.651 |
| 68 | 0.866 | 1.785 | 0.000 | 2.651 |
| 69 | 0.865 | 1.787 | 0.000 | 2.652 |
| 70 | 0.866 | 1.787 | 0.000 | 2.653 |

|    |       |       |       |       |
|----|-------|-------|-------|-------|
| 71 | 0.865 | 1.784 | 0.000 | 2.649 |
| 72 | 0.865 | 1.786 | 0.000 | 2.651 |
| 73 | 0.866 | 1.786 | 0.000 | 2.652 |
| 74 | 0.864 | 1.785 | 0.000 | 2.649 |
| 75 | 0.865 | 1.786 | 0.000 | 2.651 |
| 76 | 0.866 | 1.786 | 0.000 | 2.651 |
| 77 | 0.865 | 1.786 | 0.000 | 2.651 |
| 78 | 0.865 | 1.784 | 0.000 | 2.649 |
| 79 | 0.865 | 1.784 | 0.000 | 2.649 |
| 80 | 0.865 | 1.786 | 0.000 | 2.651 |
| 81 | 0.865 | 1.785 | 0.000 | 2.650 |
| 82 | 0.863 | 1.782 | 0.000 | 2.645 |
| 83 | 0.865 | 1.786 | 0.000 | 2.651 |
| 84 | 0.866 | 1.786 | 0.000 | 2.651 |
| 85 | 0.865 | 1.784 | 0.000 | 2.648 |
| 86 | 0.862 | 1.774 | 0.000 | 2.636 |
| 87 | 0.865 | 1.784 | 0.000 | 2.649 |
| 88 | 0.865 | 1.787 | 0.000 | 2.652 |
| 89 | 0.865 | 1.785 | 0.000 | 2.650 |
| 90 | 0.865 | 1.788 | 0.000 | 2.653 |
| 91 | 0.865 | 1.786 | 0.000 | 2.651 |
| 92 | 0.866 | 1.786 | 0.000 | 2.651 |

|     |       |       |       |       |
|-----|-------|-------|-------|-------|
| 93  | 0.864 | 1.783 | 0.000 | 2.647 |
| 94  | 0.866 | 1.785 | 0.000 | 2.651 |
| 95  | 0.865 | 1.784 | 0.000 | 2.649 |
| 96  | 0.865 | 1.786 | 0.000 | 2.651 |
| 97  | 0.866 | 1.787 | 0.000 | 2.653 |
| 98  | 0.866 | 1.789 | 0.000 | 2.655 |
| 99  | 0.865 | 1.786 | 0.000 | 2.651 |
| 100 | 0.866 | 1.786 | 0.000 | 2.651 |
| 101 | 0.865 | 1.787 | 0.000 | 2.652 |
| 102 | 0.867 | 1.790 | 0.000 | 2.657 |
| 103 | 0.865 | 1.786 | 0.000 | 2.651 |
| 104 | 0.867 | 1.785 | 0.000 | 2.653 |
| 105 | 0.866 | 1.786 | 0.000 | 2.652 |
| 106 | 0.870 | 1.778 | 0.000 | 2.648 |
| 107 | 0.869 | 1.765 | 0.000 | 2.635 |
| 108 | 0.865 | 1.783 | 0.000 | 2.648 |
| 109 | 0.869 | 1.789 | 0.000 | 2.658 |
| 110 | 0.865 | 1.786 | 0.000 | 2.651 |
| 111 | 0.867 | 1.785 | 0.000 | 2.653 |
| 112 | 0.867 | 1.789 | 0.000 | 2.655 |
| 113 | 0.871 | 1.782 | 0.000 | 2.653 |
| 114 | 0.869 | 1.765 | 0.000 | 2.634 |

|     |       |       |       |       |
|-----|-------|-------|-------|-------|
| 115 | 0.865 | 1.783 | 0.000 | 2.648 |
| 116 | 0.870 | 1.791 | 0.000 | 2.661 |
| 117 | 0.865 | 1.786 | 0.000 | 2.651 |
| 118 | 0.867 | 1.786 | 0.000 | 2.653 |
| 119 | 0.865 | 1.782 | 0.000 | 2.647 |
| 120 | 0.857 | 1.707 | 0.000 | 2.564 |
| 121 | 0.869 | 1.765 | 0.000 | 2.634 |
| 122 | 0.865 | 1.783 | 0.000 | 2.648 |
| 123 | 0.866 | 1.778 | 0.000 | 2.644 |
| 124 | 0.866 | 1.786 | 0.000 | 2.652 |
| 125 | 0.867 | 1.785 | 0.000 | 2.653 |
| 126 | 0.862 | 1.776 | 0.000 | 2.638 |
| 127 | 0.848 | 1.832 | 0.000 | 2.680 |
| 128 | 0.870 | 1.767 | 0.000 | 2.637 |
| 129 | 0.865 | 1.783 | 0.000 | 2.648 |
| 130 | 0.860 | 1.757 | 0.000 | 2.617 |
| 131 | 0.866 | 1.786 | 0.000 | 2.652 |
| 132 | 0.867 | 1.784 | 0.000 | 2.652 |
| 133 | 0.864 | 1.787 | 0.000 | 2.651 |
| 134 | 0.869 | 1.790 | 0.000 | 2.659 |
| 135 | 0.869 | 1.767 | 0.000 | 2.636 |
| 136 | 0.865 | 1.783 | 0.000 | 2.648 |

|     |       |       |       |       |
|-----|-------|-------|-------|-------|
| 137 | 0.866 | 1.772 | 0.000 | 2.637 |
| 138 | 0.866 | 1.786 | 0.000 | 2.652 |
| 139 | 0.867 | 1.785 | 0.000 | 2.652 |
| 140 | 0.866 | 1.788 | 0.000 | 2.654 |
| 141 | 0.870 | 1.779 | 0.000 | 2.649 |
| 142 | 0.869 | 1.766 | 0.000 | 2.635 |
| 143 | 0.865 | 1.783 | 0.000 | 2.648 |
| 144 | 0.869 | 1.790 | 0.000 | 2.659 |
| 145 | 0.948 | 1.736 | 0.000 | 2.684 |
| 146 | 1.240 | 1.546 | 0.074 | 2.860 |
| 147 | 1.636 | 3.544 | 0.000 | 5.180 |

-----

tot            123.070 221.586    0.074 344.731

magnetization (x)

| # of ion | s | p | d | tot |
|----------|---|---|---|-----|
|----------|---|---|---|-----|

-----

|   |       |        |       |       |
|---|-------|--------|-------|-------|
| 1 | 0.000 | -0.000 | 0.000 | 0.000 |
|---|-------|--------|-------|-------|

|   |        |       |       |        |
|---|--------|-------|-------|--------|
| 2 | -0.000 | 0.000 | 0.000 | -0.000 |
|---|--------|-------|-------|--------|

|    |        |        |       |        |
|----|--------|--------|-------|--------|
| 3  | 0.000  | -0.000 | 0.000 | 0.000  |
| 4  | -0.000 | 0.000  | 0.000 | -0.000 |
| 5  | 0.000  | -0.000 | 0.000 | 0.000  |
| 6  | -0.000 | 0.000  | 0.000 | -0.000 |
| 7  | 0.000  | -0.000 | 0.000 | 0.000  |
| 8  | -0.000 | 0.000  | 0.000 | -0.000 |
| 9  | 0.000  | -0.000 | 0.000 | 0.000  |
| 10 | -0.000 | 0.000  | 0.000 | -0.000 |
| 11 | 0.000  | -0.000 | 0.000 | 0.000  |
| 12 | -0.000 | 0.000  | 0.000 | -0.000 |
| 13 | 0.000  | -0.000 | 0.000 | 0.000  |
| 14 | -0.004 | 0.002  | 0.000 | -0.002 |
| 15 | 0.000  | -0.000 | 0.000 | 0.000  |
| 16 | -0.004 | 0.002  | 0.000 | -0.002 |
| 17 | -0.004 | 0.002  | 0.000 | -0.002 |
| 18 | 0.000  | -0.000 | 0.000 | 0.000  |
| 19 | -0.003 | 0.001  | 0.000 | -0.002 |
| 20 | 0.000  | -0.000 | 0.000 | 0.000  |
| 21 | -0.003 | 0.002  | 0.000 | -0.002 |
| 22 | -0.003 | 0.002  | 0.000 | -0.002 |
| 23 | -0.000 | 0.000  | 0.000 | -0.000 |
| 24 | -0.000 | 0.000  | 0.000 | -0.000 |

|    |        |        |       |        |
|----|--------|--------|-------|--------|
| 25 | -0.000 | -0.007 | 0.000 | -0.008 |
| 26 | -0.000 | -0.002 | 0.000 | -0.002 |
| 27 | 0.000  | 0.003  | 0.000 | 0.003  |
| 28 | 0.000  | 0.005  | 0.000 | 0.005  |
| 29 | 0.000  | 0.003  | 0.000 | 0.003  |
| 30 | -0.000 | -0.007 | 0.000 | -0.008 |
| 31 | -0.000 | -0.002 | 0.000 | -0.002 |
| 32 | 0.000  | 0.003  | 0.000 | 0.003  |
| 33 | 0.000  | 0.005  | 0.000 | 0.005  |
| 34 | 0.000  | 0.002  | 0.000 | 0.002  |
| 35 | -0.000 | -0.007 | 0.000 | -0.008 |
| 36 | -0.000 | -0.002 | 0.000 | -0.002 |
| 37 | 0.000  | 0.003  | 0.000 | 0.003  |
| 38 | 0.000  | 0.006  | 0.000 | 0.007  |
| 39 | 0.000  | 0.002  | 0.000 | 0.002  |
| 40 | -0.000 | -0.007 | 0.000 | -0.008 |
| 41 | -0.000 | -0.002 | 0.000 | -0.002 |
| 42 | 0.000  | 0.002  | 0.000 | 0.003  |
| 43 | 0.000  | 0.005  | 0.000 | 0.005  |
| 44 | 0.000  | 0.004  | 0.000 | 0.004  |
| 45 | -0.000 | -0.007 | 0.000 | -0.008 |
| 46 | -0.000 | -0.002 | 0.000 | -0.002 |

|    |        |        |       |        |
|----|--------|--------|-------|--------|
| 47 | 0.000  | 0.002  | 0.000 | 0.003  |
| 48 | 0.000  | 0.005  | 0.000 | 0.006  |
| 49 | 0.000  | 0.001  | 0.000 | 0.001  |
| 50 | -0.000 | -0.007 | 0.000 | -0.008 |
| 51 | -0.000 | -0.002 | 0.000 | -0.002 |
| 52 | 0.000  | 0.002  | 0.000 | 0.003  |
| 53 | 0.000  | 0.006  | 0.000 | 0.007  |
| 54 | 0.000  | 0.002  | 0.000 | 0.002  |
| 55 | -0.000 | -0.005 | 0.000 | -0.006 |
| 56 | -0.000 | -0.007 | 0.000 | -0.007 |
| 57 | -0.000 | -0.001 | 0.000 | -0.001 |
| 58 | -0.000 | -0.001 | 0.000 | -0.001 |
| 59 | 0.000  | 0.006  | 0.000 | 0.007  |
| 60 | 0.000  | 0.003  | 0.000 | 0.003  |
| 61 | 0.000  | 0.001  | 0.000 | 0.001  |
| 62 | 0.000  | 0.003  | 0.000 | 0.003  |
| 63 | -0.000 | -0.005 | 0.000 | -0.006 |
| 64 | -0.000 | -0.007 | 0.000 | -0.007 |
| 65 | -0.000 | -0.001 | 0.000 | -0.001 |
| 66 | -0.000 | -0.001 | 0.000 | -0.001 |
| 67 | 0.000  | 0.006  | 0.000 | 0.006  |
| 68 | 0.000  | 0.003  | 0.000 | 0.003  |

|    |        |        |       |        |
|----|--------|--------|-------|--------|
| 69 | 0.000  | 0.001  | 0.000 | 0.001  |
| 70 | 0.000  | 0.002  | 0.000 | 0.002  |
| 71 | -0.000 | -0.005 | 0.000 | -0.006 |
| 72 | -0.000 | -0.007 | 0.000 | -0.007 |
| 73 | -0.000 | -0.001 | 0.000 | -0.001 |
| 74 | -0.000 | -0.002 | 0.000 | -0.002 |
| 75 | 0.000  | 0.006  | 0.000 | 0.007  |
| 76 | 0.000  | 0.003  | 0.000 | 0.004  |
| 77 | 0.000  | 0.003  | 0.000 | 0.003  |
| 78 | 0.000  | 0.001  | 0.000 | 0.001  |
| 79 | -0.000 | -0.005 | 0.000 | -0.006 |
| 80 | -0.000 | -0.007 | 0.000 | -0.007 |
| 81 | -0.000 | -0.001 | 0.000 | -0.002 |
| 82 | -0.000 | -0.002 | 0.000 | -0.002 |
| 83 | 0.001  | 0.007  | 0.000 | 0.008  |
| 84 | 0.000  | 0.003  | 0.000 | 0.003  |
| 85 | 0.000  | 0.002  | 0.000 | 0.002  |
| 86 | 0.000  | 0.005  | 0.000 | 0.006  |
| 87 | -0.000 | -0.005 | 0.000 | -0.005 |
| 88 | -0.000 | -0.007 | 0.000 | -0.007 |
| 89 | -0.000 | -0.001 | 0.000 | -0.002 |
| 90 | -0.000 | -0.002 | 0.000 | -0.002 |

|     |        |        |       |        |
|-----|--------|--------|-------|--------|
| 91  | 0.001  | 0.008  | 0.000 | 0.008  |
| 92  | 0.000  | 0.003  | 0.000 | 0.003  |
| 93  | 0.000  | 0.002  | 0.000 | 0.003  |
| 94  | 0.000  | 0.001  | 0.000 | 0.001  |
| 95  | -0.000 | -0.005 | 0.000 | -0.006 |
| 96  | -0.000 | -0.007 | 0.000 | -0.007 |
| 97  | -0.000 | -0.001 | 0.000 | -0.001 |
| 98  | -0.000 | -0.001 | 0.000 | -0.001 |
| 99  | 0.001  | 0.007  | 0.000 | 0.007  |
| 100 | 0.000  | 0.003  | 0.000 | 0.004  |
| 101 | 0.000  | 0.003  | 0.000 | 0.003  |
| 102 | 0.000  | 0.002  | 0.000 | 0.002  |
| 103 | -0.001 | -0.010 | 0.000 | -0.011 |
| 104 | -0.003 | -0.028 | 0.000 | -0.031 |
| 105 | -0.000 | -0.001 | 0.000 | -0.002 |
| 106 | -0.000 | -0.004 | 0.000 | -0.004 |
| 107 | 0.007  | 0.116  | 0.000 | 0.122  |
| 108 | 0.001  | 0.010  | 0.000 | 0.011  |
| 109 | 0.000  | 0.001  | 0.000 | 0.001  |
| 110 | -0.001 | -0.010 | 0.000 | -0.011 |
| 111 | -0.003 | -0.028 | 0.000 | -0.031 |
| 112 | -0.000 | -0.001 | 0.000 | -0.002 |

|     |        |        |       |        |
|-----|--------|--------|-------|--------|
| 113 | -0.000 | -0.003 | 0.000 | -0.004 |
| 114 | 0.007  | 0.120  | 0.000 | 0.127  |
| 115 | 0.001  | 0.010  | 0.000 | 0.011  |
| 116 | 0.000  | 0.001  | 0.000 | 0.002  |
| 117 | -0.001 | -0.010 | 0.000 | -0.011 |
| 118 | -0.003 | -0.026 | 0.000 | -0.029 |
| 119 | -0.000 | -0.002 | 0.000 | -0.002 |
| 120 | -0.000 | -0.002 | 0.000 | -0.002 |
| 121 | 0.007  | 0.115  | 0.000 | 0.122  |
| 122 | 0.001  | 0.010  | 0.000 | 0.010  |
| 123 | 0.000  | 0.003  | 0.000 | 0.003  |
| 124 | -0.001 | -0.010 | 0.000 | -0.011 |
| 125 | -0.003 | -0.024 | 0.000 | -0.027 |
| 126 | -0.000 | -0.002 | 0.000 | -0.002 |
| 127 | -0.000 | 0.001  | 0.000 | 0.001  |
| 128 | 0.006  | 0.105  | 0.000 | 0.111  |
| 129 | 0.001  | 0.009  | 0.000 | 0.010  |
| 130 | 0.000  | 0.004  | 0.000 | 0.004  |
| 131 | -0.001 | -0.009 | 0.000 | -0.010 |
| 132 | -0.003 | -0.024 | 0.000 | -0.027 |
| 133 | -0.000 | -0.002 | 0.000 | -0.002 |
| 134 | -0.000 | -0.002 | 0.000 | -0.002 |

|     |        |        |        |        |
|-----|--------|--------|--------|--------|
| 135 | 0.006  | 0.097  | 0.000  | 0.102  |
| 136 | 0.001  | 0.009  | 0.000  | 0.010  |
| 137 | 0.000  | 0.004  | 0.000  | 0.004  |
| 138 | -0.001 | -0.010 | 0.000  | -0.011 |
| 139 | -0.003 | -0.026 | 0.000  | -0.029 |
| 140 | -0.000 | -0.002 | 0.000  | -0.002 |
| 141 | -0.000 | -0.003 | 0.000  | -0.004 |
| 142 | 0.006  | 0.105  | 0.000  | 0.111  |
| 143 | 0.001  | 0.010  | 0.000  | 0.010  |
| 144 | 0.000  | 0.002  | 0.000  | 0.003  |
| 145 | 0.000  | 0.005  | 0.000  | 0.005  |
| 146 | -0.000 | 0.000  | -0.000 | 0.000  |
| 147 | 0.000  | 0.004  | 0.000  | 0.004  |

-----

|     |       |       |        |       |
|-----|-------|-------|--------|-------|
| tot | 0.001 | 0.513 | -0.000 | 0.514 |
|-----|-------|-------|--------|-------|

CHARGE: cpu time 0.5213: real time 0.5231

FORLOC: cpu time 0.0200: real time 0.0200

FORNL : cpu time 2.0451: real time 2.0522

STRESS: cpu time 6.1179: real time 6.1385

FORCOR: cpu time 0.1407: real time 0.1487

FORHAR: cpu time 0.0333: real time 0.0334

MIXING: cpu time 0.0111: real time 0.0112

OFIELD: cpu time 0.0001: real time 0.0001

-----  
DFTD3 V3.0 Rev 1

Edisp (eV) -6.61794

E6 (eV): -3.9313

E8 (eV): -2.6866

% E8 : 40.60

FORVDW: cpu time 1.7724: real time 1.8358

FORCE on cell =-STRESS in cart. coord. units (eV):

| Direction | XX | YY | ZZ | XY | YZ | ZX |
|-----------|----|----|----|----|----|----|
|-----------|----|----|----|----|----|----|

-----  
Alpha Z 233.50077 233.50077 233.50077

Ewald 107586.10535 23471.65693-39719.08093 9.67943 3459.76939 128.99994

Hartree106106.84662 25026.80297-23787.43331 -7.10968 2949.10747 93.23067

E(xc) -1914.33054 -1916.68505 -1979.98148 0.13278 1.82732 0.13091

Local \*\*\*\*\*-53946.35858 57000.77949 0.94083 -6366.18410 -218.70006

n-local -472.76948 -482.64124 -439.72523 -0.69852 -0.82130 -0.33079

|                     |            |            |                 |          |           |          |
|---------------------|------------|------------|-----------------|----------|-----------|----------|
| augment             | -38.26579  | -38.59209  | -34.32072       | 0.00606  | -0.99933  | -0.00373 |
| Kinetic             | 7635.66571 | 7639.50130 | 8714.25750      | -3.08442 | -41.50146 | -3.20755 |
| Fock                | 0.00000    | 0.00000    | 0.00000         | 0.00000  | 0.00000   | 0.00000  |
| vdW                 | -2.64203   | -1.49238   | -6.59328        | 0.00141  | -0.07458  | 0.01172  |
| -----               |            |            |                 |          |           |          |
| Total               | -17.70877  | -14.30736  | -18.59719       | -0.13210 | 1.12340   | 0.13110  |
| in kB               | -4.88329   | -3.94533   | -5.12828        | -0.03643 | 0.30978   | 0.03615  |
| external pressure = |            | -4.65 kB   | Pullay stress = |          | 0.00 kB   |          |

VOLUME and BASIS-vectors are now :

energy-cutoff : 400.00

volume of cell : 5810.14

direct lattice vectors

reciprocal lattice vectors

|              |              |              |             |             |             |
|--------------|--------------|--------------|-------------|-------------|-------------|
| 14.780600000 | 0.000000000  | 0.000000000  | 0.067656252 | 0.000000000 | 0.000000000 |
| 0.000000000  | 21.333900000 | 0.000000000  | 0.000000000 | 0.046873755 | 0.000000000 |
| 0.000000000  | 0.000000000  | 18.425700000 | 0.000000000 | 0.000000000 | 0.054272022 |

length of vectors

|              |              |              |             |             |             |
|--------------|--------------|--------------|-------------|-------------|-------------|
| 14.780600000 | 21.333900000 | 18.425700000 | 0.067656252 | 0.046873755 | 0.054272022 |
|--------------|--------------|--------------|-------------|-------------|-------------|

FORCES acting on ions

electron-ion (+dipol)

ewald-force

non-local-force

convergence-correction

-----

|           |           |           |           |           |           |           |           |   |
|-----------|-----------|-----------|-----------|-----------|-----------|-----------|-----------|---|
| 0.480E-02 | 0.154E+03 | 0.361E+02 | -.329E-02 | -.160E+03 | -.356E+02 | -.180E-02 | 0.566E+01 | - |
| .438E+00  | 0.692E-07 | 0.278E-06 | 0.698E-06 |           |           |           |           |   |
| -.182E-01 | 0.155E+03 | -.340E+02 | 0.158E-01 | -.160E+03 | 0.335E+02 | 0.114E-02 | 0.565E+01 |   |
| 0.541E+00 | -.505E-06 | -.324E-06 | -.127E-06 |           |           |           |           |   |
| 0.184E+00 | 0.154E+03 | 0.360E+02 | -.184E+00 | -.160E+03 | -.356E+02 | 0.114E-04 | 0.565E+01 | - |
| .443E+00  | -.244E-06 | 0.447E-06 | 0.484E-06 |           |           |           |           |   |
| 0.112E+00 | 0.155E+03 | -.341E+02 | -.985E-01 | -.160E+03 | 0.336E+02 | -.174E-01 | 0.565E+01 |   |
| 0.535E+00 | -.110E-06 | 0.473E-07 | -.359E-06 |           |           |           |           |   |
| 0.171E+00 | 0.154E+03 | 0.362E+02 | -.173E+00 | -.160E+03 | -.357E+02 | 0.117E-02 | 0.566E+01 | - |
| .440E+00  | -.328E-06 | 0.533E-06 | 0.680E-06 |           |           |           |           |   |
| 0.126E+00 | 0.154E+03 | -.340E+02 | -.107E+00 | -.160E+03 | 0.334E+02 | -.211E-01 | 0.565E+01 |   |
| 0.541E+00 | 0.381E-06 | 0.258E-06 | 0.301E-06 |           |           |           |           |   |
| -.195E-01 | 0.154E+03 | 0.363E+02 | 0.183E-01 | -.160E+03 | -.359E+02 | 0.159E-02 | 0.566E+01 | - |
| .431E+00  | -.120E-06 | 0.490E-06 | 0.111E-05 |           |           |           |           |   |
| -.133E-01 | 0.154E+03 | -.338E+02 | 0.201E-01 | -.160E+03 | 0.332E+02 | -.719E-02 | 0.565E+01 |   |
| 0.555E+00 | 0.431E-06 | 0.609E-07 | 0.112E-05 |           |           |           |           |   |
| -.182E+00 | 0.154E+03 | 0.363E+02 | 0.182E+00 | -.160E+03 | -.359E+02 | 0.252E-03 | 0.565E+01 | - |

.429E+00 0.260E-06 0.354E-06 0.130E-05  
-.128E+00 0.155E+03 -.337E+02 0.114E+00 -.160E+03 0.331E+02 0.109E-01 0.565E+01  
0.561E+00 0.126E-06 -.226E-06 0.134E-05  
-.173E+00 0.154E+03 0.362E+02 0.175E+00 -.160E+03 -.358E+02 -.178E-02 0.566E+01 -  
.432E+00 0.363E-06 0.188E-06 0.111E-05  
-.114E+00 0.155E+03 -.338E+02 0.951E-01 -.160E+03 0.332E+02 0.192E-01 0.565E+01  
0.555E+00 -.327E-06 -.309E-06 0.731E-06  
0.228E+01 -.150E+03 -.386E+02 -.227E+01 0.156E+03 0.386E+02 -.103E-01 -.566E+01  
0.767E-01 0.407E-06 -.689E-06 0.493E-08  
-.416E+00 -.151E+03 0.388E+02 0.418E+00 0.157E+03 -.386E+02 -.131E-02 -.567E+01 -  
.269E+00 -.135E-06 -.785E-06 0.119E-06  
0.136E+02 -.146E+03 -.413E+02 -.138E+02 0.151E+03 0.413E+02 0.257E+00 -.567E+01 -  
.347E-01 -.948E-07 -.404E-06 -.116E-06  
0.162E+01 -.151E+03 0.402E+02 -.162E+01 0.156E+03 -.400E+02 -.996E-03 -.567E+01 -  
.229E+00 0.319E-06 -.559E-06 0.693E-06  
0.352E+01 -.149E+03 0.443E+02 -.352E+01 0.155E+03 -.441E+02 -.192E-02 -.567E+01 -  
.180E+00 0.395E-06 -.453E-06 0.501E-06  
-.149E+02 -.146E+03 -.329E+02 0.150E+02 0.151E+03 0.329E+02 -.972E-01 -.566E+01  
0.497E-01 0.672E-06 -.495E-06 -.108E-06  
-.297E+01 -.149E+03 0.432E+02 0.296E+01 0.155E+03 -.430E+02 0.115E-01 -.567E+01 -  
.241E+00 -.193E-06 -.637E-06 -.737E-06  
-.380E+01 -.150E+03 -.385E+02 0.380E+01 0.156E+03 0.385E+02 -.639E-02 -.566E+01

0.241E-01    -.592E-07 -.800E-06 0.213E-06  
              -.208E+01 -.151E+03 0.395E+02    0.208E+01 0.156E+03 -.392E+02    0.147E-02 -.566E+01 -  
.282E+00    -.465E-06 -.833E-06 -.482E-06  
              0.285E-02 -.148E+03 0.486E+02    0.479E-02 0.154E+03 -.484E+02    -.555E-02 -.569E+01 -  
.158E+00    0.123E-06 -.556E-06 -.435E-06  
              0.196E+02 -.103E+03 0.222E+02    -.212E+02 0.103E+03 -.246E+02    0.154E+01 0.139E+00  
0.238E+01    -.754E-06 -.732E-06 0.214E-07  
              -.192E+02 -.103E+03 0.153E+02    0.216E+02 0.103E+03 -.168E+02    -.241E+01 -.118E+00  
0.152E+01    -.844E-07 -.765E-06 -.374E-06  
              0.716E-01 0.461E+03 0.202E+03    -.748E-01 -.462E+03 -.201E+03    0.381E-02 0.102E+01 -  
.219E+00    0.626E-06 0.584E-06 0.153E-05  
              0.212E+00 0.353E+03 -.234E+03    -.212E+00 -.353E+03 0.234E+03    0.260E-02 0.442E+00 -  
.370E-01    -.472E-06 -.658E-06 -.229E-05  
              -.248E-01 0.351E+03 0.240E+03    0.235E-01 -.351E+03 -.241E+03    0.312E-02 0.407E+00  
0.562E-01    0.140E-05 0.919E-07 0.187E-05  
              -.173E+00 0.462E+03 -.195E+03    0.179E+00 -.463E+03 0.195E+03    -.669E-02 0.105E+01  
0.233E+00    -.159E-05 -.166E-05 -.136E-05  
              -.624E-01 0.210E+03 -.272E+03    0.665E-01 -.210E+03 0.272E+03    -.449E-02 0.928E-01  
0.560E-01    -.214E-06 0.830E-06 -.168E-05  
              0.562E+00 0.461E+03 0.202E+03    -.564E+00 -.462E+03 -.201E+03    0.204E-02 0.102E+01 -  
.214E+00    -.777E-06 0.113E-05 0.807E-06  
              0.106E+01 0.352E+03 -.234E+03    -.107E+01 -.353E+03 0.234E+03    0.161E-01 0.447E+00 -

.424E-01 0.713E-06 -.641E-06 -.135E-05  
0.413E+00 0.351E+03 0.240E+03 -.415E+00 -.351E+03 -.240E+03 0.302E-02 0.407E+00

0.490E-01 0.584E-07 0.261E-06 0.368E-06  
0.578E+00 0.462E+03 -.195E+03 -.583E+00 -.463E+03 0.195E+03 0.483E-02 0.105E+01

0.235E+00 0.558E-07 -.438E-06 -.217E-05  
0.691E+00 0.210E+03 -.272E+03 -.697E+00 -.210E+03 0.272E+03 0.613E-02 0.905E-01

0.615E-01 0.471E-06 0.792E-06 -.991E-06  
0.425E+00 0.461E+03 0.202E+03 -.428E+00 -.462E+03 -.202E+03 0.389E-02 0.102E+01 -

.214E+00 -.138E-05 0.123E-05 0.200E-05  
0.939E+00 0.352E+03 -.233E+03 -.955E+00 -.352E+03 0.233E+03 0.152E-01 0.440E+00 -

.376E-01 0.981E-06 -.171E-05 0.150E-05  
0.478E+00 0.351E+03 0.241E+03 -.480E+00 -.351E+03 -.241E+03 0.253E-02 0.405E+00

0.510E-01 -.126E-05 0.616E-06 0.738E-06  
0.704E+00 0.462E+03 -.194E+03 -.714E+00 -.463E+03 0.194E+03 0.796E-02 0.106E+01

0.242E+00 0.143E-05 -.961E-06 0.469E-06  
0.727E+00 0.210E+03 -.271E+03 -.736E+00 -.210E+03 0.271E+03 0.674E-02 0.903E-01

0.593E-01 0.614E-06 -.176E-06 0.665E-06  
-.182E+00 0.461E+03 0.202E+03 0.178E+00 -.462E+03 -.202E+03 0.451E-02 0.102E+01 -

.218E+00 -.658E-06 0.121E-05 0.405E-05  
-.294E+00 0.352E+03 -.233E+03 0.298E+00 -.352E+03 0.233E+03 -.207E-02 0.439E+00 -

.298E-01 0.648E-06 -.246E-05 0.336E-05  
0.403E-01 0.351E+03 0.241E+03 -.393E-01 -.351E+03 -.241E+03 0.227E-02 0.409E+00

0.556E-01 - .123E-05 0.827E-06 0.257E-05  
0.496E-01 0.462E+03 -.194E+03 -.558E-01 -.463E+03 0.194E+03 0.405E-02 0.106E+01  
0.232E+00 0.137E-05 -.238E-05 0.342E-05  
-.476E-01 0.210E+03 -.271E+03 0.455E-01 -.210E+03 0.271E+03 -.268E-03 0.927E-01  
0.325E-01 0.417E-06 -.957E-06 0.165E-05  
-.551E+00 0.461E+03 0.202E+03 0.549E+00 -.462E+03 -.202E+03 0.747E-03 0.102E+01 -  
.220E+00 0.770E-06 0.763E-06 0.475E-05  
-.119E+01 0.352E+03 -.233E+03 0.120E+01 -.353E+03 0.233E+03 -.163E-01 0.446E+00 -  
.329E-01 -.494E-06 -.287E-05 0.247E-05  
-.352E+00 0.351E+03 0.241E+03 0.349E+00 -.351E+03 -.241E+03 0.206E-02 0.413E+00  
0.622E-01 -.830E-07 0.731E-06 0.412E-05  
-.411E+00 0.462E+03 -.194E+03 0.425E+00 -.463E+03 0.194E+03 -.116E-01 0.106E+01  
0.231E+00 0.104E-06 -.320E-05 0.414E-05  
-.563E+00 0.210E+03 -.271E+03 0.567E+00 -.210E+03 0.271E+03 -.962E-02 0.907E-01  
0.525E-01 -.478E-06 -.834E-06 0.103E-05  
-.474E+00 0.461E+03 0.202E+03 0.474E+00 -.462E+03 -.202E+03 0.302E-02 0.102E+01 -  
.221E+00 0.142E-05 0.312E-06 0.351E-05  
-.805E+00 0.353E+03 -.234E+03 0.820E+00 -.353E+03 0.234E+03 -.150E-01 0.446E+00 -  
.393E-01 -.138E-05 -.207E-05 -.361E-06  
-.374E+00 0.351E+03 0.241E+03 0.368E+00 -.351E+03 -.241E+03 0.919E-03 0.410E+00  
0.625E-01 0.110E-05 0.324E-06 0.373E-05  
-.593E+00 0.462E+03 -.194E+03 0.606E+00 -.463E+03 0.194E+03 -.171E-01 0.105E+01

0.234E+00 -.140E-05 -.316E-05 0.186E-05  
-.590E+00 0.210E+03 -.272E+03 0.601E+00 -.210E+03 0.272E+03 -.103E-01 0.984E-01  
0.566E-01 -.805E-06 0.112E-06 -.623E-06  
-.966E-02 0.206E+03 0.279E+03 0.130E-01 -.206E+03 -.279E+03 -.363E-02 0.684E-01 -  
.413E-01 0.124E-05 0.259E-09 0.999E-06  
0.667E+00 0.303E+02 0.296E+03 -.662E+00 -.302E+02 -.296E+03 -.469E-02 -.412E-01  
0.730E-02 0.355E-06 -.682E-06 0.569E-06  
-.848E+00 0.144E+03 -.282E+03 0.850E+00 -.144E+03 0.282E+03 -.318E-02 0.136E+00  
0.286E-01 -.473E-06 0.844E-06 -.928E-06  
0.533E+00 -.214E+02 -.285E+03 -.534E+00 0.214E+02 0.285E+03 -.783E-03 0.380E-01  
0.186E-01 -.644E-07 0.176E-05 0.682E-06  
0.496E+00 -.294E+02 0.293E+03 -.493E+00 0.294E+02 -.293E+03 -.555E-02 0.252E-01 -  
.306E-01 0.268E-07 -.858E-07 0.929E-06  
0.523E+00 0.139E+03 0.289E+03 -.524E+00 -.139E+03 -.289E+03 0.177E-02 0.103E+00 -  
.250E-01 0.633E-06 -.458E-06 0.230E-06  
-.127E+01 0.365E+02 -.287E+03 0.127E+01 -.364E+02 0.287E+03 -.220E-03 -.838E-02  
0.139E-01 -.526E-06 0.145E-05 0.130E-06  
0.167E+01 -.130E+03 -.271E+03 -.168E+01 0.130E+03 0.271E+03 0.106E-01 -.885E-01  
0.373E-01 0.843E-07 0.107E-05 0.113E-05  
0.397E+00 0.207E+03 0.280E+03 -.395E+00 -.207E+03 -.280E+03 0.717E-03 0.692E-01 -  
.372E-01 0.219E-06 -.351E-06 -.190E-06  
0.921E+00 0.312E+02 0.296E+03 -.924E+00 -.311E+02 -.296E+03 0.229E-02 -.412E-01

0.120E-01 0.490E-07 -.661E-06 0.234E-06  
0.133E+01 0.144E+03 -.282E+03 -.133E+01 -.144E+03 0.282E+03 0.501E-02 0.125E+00  
0.279E-01 0.181E-06 0.106E-05 -.994E-06  
0.342E+01 -.199E+02 -.285E+03 -.344E+01 0.199E+02 0.285E+03 0.139E-01 0.407E-01  
0.138E-01 0.393E-06 0.175E-05 0.328E-06  
0.139E+01 -.287E+02 0.294E+03 -.139E+01 0.287E+02 -.294E+03 -.347E-02 0.251E-01 -  
.310E-01 0.208E-06 -.683E-06 0.876E-06  
0.678E+00 0.139E+03 0.290E+03 -.679E+00 -.139E+03 -.290E+03 0.646E-03 0.103E+00 -  
.297E-01 -.291E-06 -.467E-06 -.235E-06  
0.160E+01 0.367E+02 -.287E+03 -.159E+01 -.367E+02 0.287E+03 -.126E-01 -.213E-01  
0.129E-01 0.366E-06 0.149E-05 0.150E-06  
0.613E+01 -.125E+03 -.271E+03 -.615E+01 0.125E+03 0.271E+03 0.222E-01 -.899E-01  
0.148E-01 0.330E-06 0.118E-05 0.481E-06  
0.368E+00 0.207E+03 0.280E+03 -.373E+00 -.207E+03 -.280E+03 0.141E-03 0.681E-01 -  
.367E-01 -.106E-05 0.111E-06 0.124E-06  
-.350E-01 0.319E+02 0.296E+03 0.264E-01 -.319E+02 -.296E+03 0.106E-01 -.364E-01  
0.137E-01 -.342E-06 0.407E-06 0.124E-06  
0.210E+01 0.144E+03 -.281E+03 -.211E+01 -.144E+03 0.281E+03 0.122E-01 0.120E+00  
0.241E-01 0.366E-06 0.958E-06 -.973E-07  
0.304E+01 -.171E+02 -.283E+03 -.307E+01 0.170E+02 0.283E+03 0.247E-01 0.861E-01  
0.615E-01 -.595E-07 0.183E-05 0.198E-06  
0.106E+01 -.272E+02 0.294E+03 -.106E+01 0.272E+02 -.294E+03 0.292E-02 0.242E-01 -

.378E-01 0.153E-06 0.159E-07 0.412E-06  
0.979E-01 0.140E+03 0.290E+03 -.995E-01 -.140E+03 -.290E+03 0.133E-02 0.107E+00 -  
.233E-01 -.893E-06 0.393E-06 0.469E-06  
0.277E+01 0.387E+02 -.286E+03 -.278E+01 -.387E+02 0.286E+03 0.144E-02 -.115E-01  
0.294E-01 0.305E-06 0.150E-05 0.111E-06  
0.598E+01 -.115E+03 -.267E+03 -.614E+01 0.115E+03 0.267E+03 0.153E+00 0.276E-03  
0.131E+00 0.110E-05 0.146E-05 0.231E-06  
-.241E+00 0.207E+03 0.280E+03 0.239E+00 -.207E+03 -.280E+03 0.440E-02 0.714E-01 -  
.388E-01 -.112E-05 0.854E-06 0.149E-05  
-.114E+01 0.314E+02 0.294E+03 0.113E+01 -.314E+02 -.294E+03 0.919E-02 -.313E-01  
0.525E-02 -.413E-06 0.127E-05 0.380E-06  
0.597E+00 0.144E+03 -.281E+03 -.614E+00 -.144E+03 0.281E+03 0.180E-01 0.125E+00  
0.438E-01 0.629E-06 -.121E-06 0.892E-06  
-.938E+00 -.159E+02 -.286E+03 0.930E+00 0.158E+02 0.285E+03 0.598E-02 0.906E-01  
0.807E-01 0.483E-06 0.263E-05 0.165E-06  
-.640E+00 -.265E+02 0.293E+03 0.637E+00 0.265E+02 -.293E+03 0.492E-02 0.233E-01 -  
.272E-01 -.147E-06 0.112E-05 -.840E-07  
-.533E+00 0.139E+03 0.289E+03 0.529E+00 -.139E+03 -.289E+03 0.655E-02 0.114E+00 -  
.215E-01 -.670E-06 0.113E-05 0.158E-05  
0.783E+00 0.408E+02 -.287E+03 -.796E+00 -.408E+02 0.287E+03 0.543E-02 0.186E-02 -  
.188E-01 0.339E-06 0.149E-05 0.287E-06  
-.456E+00 -.113E+03 -.276E+03 0.422E+00 0.113E+03 0.276E+03 0.348E-01 0.596E-01 -

.268E+00 0.271E-06 -.705E-06 -.505E-07  
-.572E+00 0.206E+03 0.279E+03 0.570E+00 -.206E+03 -.279E+03 0.115E-02 0.717E-01 -  
.457E-01 -.168E-06 0.112E-05 0.272E-05  
-.785E+00 0.304E+02 0.294E+03 0.788E+00 -.304E+02 -.294E+03 -.759E-02 -.310E-01 -  
.157E-02 0.286E-07 0.126E-05 0.793E-06  
-.123E+01 0.144E+03 -.281E+03 0.125E+01 -.145E+03 0.281E+03 -.160E-01 0.122E+00  
0.504E-01 -.166E-06 -.225E-06 0.947E-06  
-.367E+01 -.174E+02 -.283E+03 0.370E+01 0.173E+02 0.283E+03 -.311E-01 0.115E+00  
0.596E-01 -.256E-06 0.209E-05 0.189E-06  
-.130E+01 -.277E+02 0.291E+03 0.129E+01 0.277E+02 -.291E+03 -.134E-02 0.339E-01 -  
.221E-01 -.184E-06 0.159E-05 0.183E-07  
-.348E+00 0.139E+03 0.289E+03 0.347E+00 -.139E+03 -.289E+03 -.837E-06 0.111E+00 -  
.148E-01 0.270E-06 0.112E-05 0.211E-05  
-.833E+00 0.400E+02 -.287E+03 0.826E+00 -.400E+02 0.287E+03 0.122E-01 -.775E-02 -  
.180E-01 0.509E-07 0.163E-05 0.286E-06  
-.788E+01 -.119E+03 -.267E+03 0.808E+01 0.119E+03 0.267E+03 -.190E+00 0.205E-02  
0.363E-01 -.116E-05 0.117E-05 0.222E-06  
-.410E+00 0.206E+03 0.279E+03 0.411E+00 -.206E+03 -.279E+03 -.283E-02 0.712E-01 -  
.466E-01 0.878E-06 0.733E-06 0.244E-05  
-.661E-01 0.300E+02 0.294E+03 0.758E-01 -.299E+02 -.294E+03 -.952E-02 -.349E-01  
0.101E-02 0.335E-06 0.415E-06 0.855E-06  
-.206E+01 0.145E+03 -.282E+03 0.208E+01 -.145E+03 0.282E+03 -.190E-01 0.131E+00

0.257E-01    -.597E-06 0.347E-06 0.105E-06  
              -.257E+01 -.208E+02 -.285E+03    0.260E+01 0.208E+02 0.285E+03    -.294E-01 0.402E-01  
0.320E-01    -.461E-06 0.169E-05 0.396E-06  
              -.555E+00 -.290E+02 0.291E+03    0.560E+00 0.290E+02 -.291E+03    -.289E-02 0.291E-01 -  
.253E-01    -.509E-07 0.109E-05 0.503E-06  
              0.575E-01 0.139E+03 0.289E+03    -.576E-01 -.139E+03 -.289E+03    -.376E-03 0.109E+00 -  
.210E-01    0.952E-06 0.380E-06 0.139E-05  
              -.290E+01 0.378E+02 -.286E+03    0.292E+01 -.378E+02 0.286E+03    -.150E-01 -.435E-02  
0.211E-01    -.572E-06 0.150E-05 0.179E-06  
              -.515E+01 -.128E+03 -.271E+03    0.520E+01 0.128E+03 0.271E+03    -.466E-01 -.869E-01  
0.381E-01    -.636E-06 0.837E-06 0.590E-06  
              0.395E+00 -.137E+03 0.280E+03    -.387E+00 0.137E+03 -.280E+03    -.975E-02 -.128E+00 -  
.159E-01    -.549E-06 -.133E-06 0.138E-05  
              0.193E+01 -.343E+03 0.233E+03    -.194E+01 0.344E+03 -.233E+03    0.907E-02 -.461E+00 -  
.551E-01    -.176E-06 -.152E-05 0.243E-05  
              -.254E+01 -.197E+03 -.259E+03    0.255E+01 0.197E+03 0.259E+03    -.943E-02 -.199E+00  
0.370E-01    -.195E-06 0.483E-07 0.925E-06  
              0.691E+01 -.447E+03 -.198E+03    -.693E+01 0.448E+03 0.198E+03    0.983E-02 -.112E+01  
0.889E-01    0.775E-06 -.131E-05 0.314E-06  
              -.469E+00 -.451E+03 0.204E+03    0.470E+00 0.452E+03 -.204E+03    -.223E-02 -.108E+01 -  
.113E+00    -.845E-06 -.277E-05 0.104E-05  
              0.171E+01 -.203E+03 0.269E+03    -.170E+01 0.203E+03 -.269E+03    -.483E-02 -.929E-01 -

.323E-01    -.230E-06 -.709E-06 0.222E-05  
          -.212E+01 -.338E+03 -.222E+03    0.216E+01 0.338E+03 0.222E+03    -.440E-01 -.605E+00

0.540E-01    0.199E-06 -.177E-05 0.531E-06  
          0.218E+01 -.136E+03 0.282E+03    -.218E+01 0.136E+03 -.282E+03    -.632E-02 -.126E+00 -

.973E-02    0.302E-06 -.541E-06 0.203E-05  
          0.672E+01 -.339E+03 0.238E+03    -.670E+01 0.340E+03 -.238E+03    -.125E-01 -.462E+00 -

.464E-01    0.109E-05 -.996E-06 0.276E-05  
          0.679E+01 -.193E+03 -.258E+03    -.680E+01 0.193E+03 0.258E+03    0.112E-01 -.146E+00

0.635E-01    0.365E-06 0.281E-06 0.851E-06  
          0.313E+02 -.427E+03 -.198E+03    -.314E+02 0.428E+03 0.197E+03    0.730E-01 -.966E+00

0.132E+00    0.420E-06 -.131E-05 -.201E-06  
          0.544E+01 -.449E+03 0.209E+03    -.544E+01 0.451E+03 -.209E+03    0.671E-03 -.108E+01 -

.802E-01    0.832E-06 -.205E-05 0.298E-05  
          0.369E+01 -.201E+03 0.272E+03    -.368E+01 0.201E+03 -.272E+03    -.661E-03 -.978E-01 -

.309E-01    0.830E-06 -.467E-06 0.217E-05  
          0.124E+02 -.332E+03 -.223E+03    -.125E+02 0.332E+03 0.223E+03    0.120E+00 -.536E+00

0.316E-01    0.422E-06 -.933E-06 0.271E-06  
          0.219E+01 -.133E+03 0.283E+03    -.219E+01 0.133E+03 -.283E+03    0.637E-03 -.128E+00 -

.472E-02    0.709E-06 0.631E-07 0.109E-05  
          0.493E+01 -.332E+03 0.245E+03    -.490E+01 0.332E+03 -.245E+03    -.318E-01 -.476E+00 -

.378E-01    0.104E-05 -.512E-06 0.146E-06  
          0.113E+02 -.182E+03 -.258E+03    -.113E+02 0.182E+03 0.258E+03    0.475E-01 -.989E-01 -

.104E+00    -.631E-08 0.106E-05 0.197E-06  
0.319E+02 -.399E+03 -.175E+03    -.322E+02 0.401E+03 0.174E+03    0.295E+00 -.140E+01  
0.133E+01    -.141E-05 -.443E-05 0.102E-05  
0.931E+01 -.443E+03 0.219E+03    -.930E+01 0.444E+03 -.219E+03    -.528E-02 -.109E+01 -  
.485E-01    0.147E-05 -.118E-05 0.187E-05  
0.169E+01 -.196E+03 0.273E+03    -.170E+01 0.197E+03 -.273E+03    0.557E-02 -.109E+00 -  
.514E-01    0.817E-06 0.305E-06 0.291E-06  
0.172E+02 -.310E+03 -.216E+03    -.176E+02 0.310E+03 0.216E+03    0.325E+00 -.219E+00  
0.124E+00    -.116E-05 -.243E-05 0.386E-06  
-.103E+01 -.132E+03 0.281E+03    0.102E+01 0.132E+03 -.281E+03    0.103E-01 -.127E+00 -  
.136E-03    0.366E-06 0.963E-06 -.527E-06  
-.512E+01 -.332E+03 0.239E+03    0.511E+01 0.332E+03 -.239E+03    0.876E-02 -.494E+00 -  
.423E-01    0.171E-06 -.457E-06 -.250E-05  
0.161E+01 -.169E+03 -.261E+03    -.173E+01 0.169E+03 0.261E+03    0.117E+00 0.371E+00 -  
.967E-01    -.154E-05 -.219E-05 -.854E-07  
-.648E+01 -.301E+03 -.188E+03    0.600E+01 0.296E+03 0.184E+03    0.470E+00 0.509E+01  
0.400E+01    -.576E-06 -.479E-05 -.433E-05  
-.615E+00 -.436E+03 0.227E+03    0.613E+00 0.437E+03 -.227E+03    0.164E-02 -.120E+01 -  
.480E-01    0.709E-06 -.109E-05 -.167E-05  
-.302E+01 -.197E+03 0.268E+03    0.301E+01 0.197E+03 -.268E+03    0.146E-01 -.112E+00 -  
.431E-01    0.119E-06 0.888E-06 -.151E-05  
0.347E+01 -.280E+03 -.215E+03    -.537E+01 0.280E+03 0.214E+03    0.191E+01 0.643E+00

0.821E+00 - .521E-05 -.442E-05 -.656E-06  
-.274E+01 -.134E+03 0.277E+03 0.274E+01 0.134E+03 -.277E+03 0.244E-02 -.124E+00 -  
.187E-01 -.189E-06 0.138E-05 -.111E-05  
-.601E+01 -.338E+03 0.230E+03 0.601E+01 0.339E+03 -.230E+03 0.112E-01 -.494E+00 -  
.464E-01 -.730E-06 -.802E-06 -.239E-05  
-.653E+01 -.171E+03 -.257E+03 0.661E+01 0.170E+03 0.257E+03 -.771E-01 0.485E+00  
0.145E-01 0.197E-05 -.258E-05 -.655E-07  
-.443E+02 -.422E+03 -.184E+03 0.449E+02 0.423E+03 0.183E+03 -.564E+00 -.108E+01  
0.637E+00 0.845E-06 -.465E-05 0.522E-06  
-.867E+01 -.441E+03 0.211E+03 0.866E+01 0.443E+03 -.211E+03 0.143E-01 -.111E+01 -  
.758E-01 -.453E-06 -.140E-05 -.303E-05  
-.293E+01 -.201E+03 0.265E+03 0.294E+01 0.201E+03 -.265E+03 -.922E-02 -.110E+00 -  
.207E-01 -.529E-06 0.793E-06 -.132E-05  
-.146E+02 -.290E+03 -.209E+03 0.166E+02 0.289E+03 0.208E+03 -.198E+01 0.605E+00  
0.781E+00 0.505E-05 -.517E-05 -.655E-06  
-.139E+01 -.136E+03 0.277E+03 0.140E+01 0.136E+03 -.277E+03 -.103E-01 -.125E+00 -  
.242E-01 -.599E-06 0.884E-06 -.132E-06  
-.280E+01 -.343E+03 0.230E+03 0.277E+01 0.343E+03 -.230E+03 0.233E-01 -.473E+00 -  
.597E-01 -.130E-05 -.156E-05 -.587E-07  
-.104E+02 -.189E+03 -.258E+03 0.105E+02 0.189E+03 0.258E+03 -.774E-01 -.139E+00 -  
.524E-01 -.597E-06 0.137E-06 0.292E-06  
-.150E+02 -.446E+03 -.196E+03 0.150E+02 0.447E+03 0.196E+03 -.695E-01 -.112E+01

0.992E-01    -.547E-06 -.286E-05 0.446E-06  
               -.550E+01 -.448E+03 0.204E+03    0.551E+01 0.449E+03 -.204E+03    -.503E-02 -.108E+01 -  
 .125E+00    -.155E-05 -.243E-05 -.173E-05  
               -.919E+00 -.203E+03 0.267E+03    0.927E+00 0.203E+03 -.267E+03    -.918E-02 -.102E+00 -  
 .320E-01    -.964E-06 -.861E-08 0.530E-06  
               -.163E+02 -.329E+03 -.218E+03    0.167E+02 0.329E+03 0.218E+03    -.360E+00 -.480E+00  
 0.435E-01    0.976E-06 -.325E-05 0.573E-06  
               -.267E+01 -.254E+03 -.190E+03    0.158E+01 0.245E+03 0.185E+03    0.986E+00 0.775E+01  
 0.499E+01    -.313E-05 -.217E-04 -.190E-04  
               0.531E+02 -.518E+03 -.137E+03    -.542E+02 0.522E+03 0.141E+03    0.105E+01 -.395E+01 -  
 .382E+01    -.347E-05 -.322E-05 -.259E-07  
               -.471E+02 -.589E+03 -.451E+03    0.532E+02 0.641E+03 0.487E+03    -.602E+01 -.514E+02 -  
 .351E+02    -.188E-05 0.138E-04 -.794E-06  
 -----  
               0.453E+01 0.282E+02 0.232E+02    -.334E-12 -.705E-11 0.125E-11    -.457E+01 -.282E+02 -  
 .232E+02    -.833E-05 -.470E-04 0.574E-04

POSITION

TOTAL-FORCE (eV/Angst)

-----

|         |         |         |           |          |           |
|---------|---------|---------|-----------|----------|-----------|
| 1.24575 | 4.02870 | 5.43979 | 0.000040  | 0.000961 | -0.000382 |
| 1.21024 | 4.07581 | 8.43726 | -0.000982 | 0.002516 | -0.001189 |

|          |          |         |           |           |           |
|----------|----------|---------|-----------|-----------|-----------|
| 3.70862  | 4.02890  | 5.43965 | 0.000300  | 0.001833  | -0.001067 |
| 3.67998  | 4.07733  | 8.43690 | -0.004044 | -0.000515 | -0.002945 |
| 6.17157  | 4.02854  | 5.43942 | -0.000019 | -0.000197 | -0.001728 |
| 6.14482  | 4.08292  | 8.43295 | -0.002850 | -0.003398 | -0.003251 |
| 8.63513  | 4.02801  | 5.43869 | 0.000767  | -0.000504 | -0.001981 |
| 8.60339  | 4.08732  | 8.43089 | -0.000145 | -0.001264 | -0.002287 |
| 11.09928 | 4.02784  | 5.43885 | 0.000870  | 0.001910  | -0.002693 |
| 11.06021 | 4.08619  | 8.43099 | -0.001750 | 0.000617  | -0.000723 |
| 13.56311 | 4.02807  | 5.43972 | 0.000333  | 0.001561  | -0.001597 |
| 13.52141 | 4.08047  | 8.43349 | 0.000408  | -0.002350 | 0.000229  |
| 2.44241  | 15.48073 | 8.85224 | -0.000629 | -0.005202 | 0.002196  |
| 0.01714  | 15.44624 | 5.32469 | 0.000366  | 0.001519  | -0.001147 |
| 4.86040  | 15.47728 | 8.86623 | 0.000741  | 0.000383  | -0.000117 |
| 2.48016  | 15.44854 | 5.27562 | 0.000353  | -0.001226 | -0.000449 |
| 4.94382  | 15.44925 | 5.24869 | 0.001709  | -0.002959 | 0.000263  |
| 12.31531 | 15.48242 | 9.00211 | -0.002464 | 0.002248  | 0.002313  |
| 9.86772  | 15.44556 | 5.34176 | 0.000430  | -0.001072 | 0.000863  |
| 14.76279 | 15.48245 | 8.89951 | -0.005935 | -0.000327 | 0.005445  |
| 12.33384 | 15.44510 | 5.36128 | 0.001396  | -0.003195 | -0.001291 |
| 7.40743  | 15.44616 | 5.26463 | 0.002366  | 0.001678  | 0.001293  |
| 6.44846  | 16.34427 | 7.40648 | -0.002118 | 0.001026  | 0.003873  |
| 8.60064  | 16.47644 | 7.89249 | 0.008003  | 0.001499  | 0.004011  |

|          |         |         |           |           |           |
|----------|---------|---------|-----------|-----------|-----------|
| 1.24544  | 5.11881 | 5.35500 | 0.000953  | 0.000264  | -0.002519 |
| 2.44348  | 5.83889 | 8.62292 | 0.002415  | -0.004528 | 0.001205  |
| 0.01380  | 5.79530 | 5.28573 | 0.002064  | -0.002594 | 0.000476  |
| 1.21063  | 5.16420 | 8.54151 | 0.000246  | -0.000546 | -0.001819 |
| 2.44351  | 7.27931 | 8.74832 | -0.000117 | -0.001246 | -0.000109 |
| 3.70866  | 5.11896 | 5.35390 | -0.000433 | -0.001528 | 0.000274  |
| 4.90800  | 5.84315 | 8.62123 | -0.001089 | 0.003763  | -0.000792 |
| 2.47701  | 5.79561 | 5.28397 | 0.001438  | -0.000731 | -0.002602 |
| 3.67679  | 5.16572 | 8.54000 | -0.000135 | 0.001597  | 0.000028  |
| 4.90764  | 7.28398 | 8.74777 | 0.000811  | -0.000593 | 0.001066  |
| 6.17184  | 5.11860 | 5.35433 | 0.001472  | 0.000516  | 0.000826  |
| 7.37096  | 5.84929 | 8.62094 | -0.000630 | 0.006986  | -0.002458 |
| 4.94029  | 5.79548 | 5.28340 | 0.000594  | -0.002829 | -0.001170 |
| 6.14080  | 5.17108 | 8.53715 | -0.002532 | 0.002570  | 0.002552  |
| 7.37071  | 7.28983 | 8.75132 | -0.001929 | 0.001657  | 0.000159  |
| 8.63543  | 5.11820 | 5.35521 | 0.001247  | 0.001503  | -0.001147 |
| 9.83233  | 5.85166 | 8.62337 | 0.002767  | 0.000237  | -0.001127 |
| 7.40374  | 5.79498 | 5.28512 | 0.003434  | -0.002846 | -0.001334 |
| 8.60194  | 5.17528 | 8.53759 | -0.001853 | -0.000302 | -0.000108 |
| 9.83204  | 7.29110 | 8.75719 | -0.001883 | -0.002219 | -0.002395 |
| 11.09930 | 5.11814 | 5.35578 | -0.000873 | -0.003192 | -0.001438 |
| 12.29449 | 5.84673 | 8.62385 | 0.000049  | 0.005621  | -0.002205 |

|          |          |         |           |           |           |
|----------|----------|---------|-----------|-----------|-----------|
| 9.86750  | 5.79468  | 5.28678 | -0.000762 | -0.000885 | 0.001553  |
| 11.06261 | 5.17409  | 8.53894 | 0.002624  | 0.002805  | -0.000295 |
| 12.29428 | 7.28729  | 8.75533 | -0.004578 | 0.001262  | -0.001495 |
| 13.56278 | 5.11829  | 5.35605 | 0.002658  | 0.000662  | -0.002055 |
| 14.75895 | 5.83988  | 8.62434 | -0.000194 | -0.002721 | -0.002235 |
| 12.33118 | 5.79480  | 5.28692 | -0.004503 | -0.001626 | 0.002596  |
| 13.52535 | 5.16844  | 8.54022 | -0.003551 | 0.003842  | -0.001336 |
| 14.75917 | 7.28012  | 8.75179 | 0.000830  | 0.002535  | -0.000673 |
| 0.01434  | 7.23830  | 5.19017 | 0.000086  | -0.000226 | 0.000067  |
| 1.24689  | 9.38061  | 5.13160 | 0.000530  | -0.001866 | -0.000012 |
| 1.21085  | 7.98059  | 8.79588 | -0.000912 | -0.000537 | 0.001530  |
| 2.44214  | 10.12243 | 8.87141 | -0.000994 | 0.002724  | -0.005019 |
| 0.01532  | 10.08686 | 5.14049 | -0.002039 | -0.000177 | -0.002397 |
| 1.24606  | 7.94244  | 5.15775 | 0.002006  | -0.002647 | 0.000834  |
| 1.21082  | 9.41592  | 8.85782 | -0.000549 | 0.004550  | 0.000215  |
| 2.44072  | 11.55513 | 8.88414 | -0.006230 | -0.002340 | 0.001723  |
| 2.47747  | 7.23842  | 5.18585 | 0.002794  | 0.002867  | 0.001301  |
| 3.70997  | 9.38055  | 5.12566 | -0.001081 | -0.003016 | 0.000035  |
| 3.67534  | 7.98360  | 8.79349 | -0.000544 | 0.001027  | 0.000931  |
| 4.90487  | 10.12925 | 8.87518 | 0.000392  | -0.000827 | 0.000009  |
| 2.47867  | 10.08713 | 5.12695 | -0.002276 | 0.001473  | 0.000760  |
| 3.70939  | 7.94242  | 5.15441 | 0.000799  | -0.004054 | -0.001694 |

|          |          |         |           |           |           |
|----------|----------|---------|-----------|-----------|-----------|
| 3.67589  | 9.41970  | 8.85445 | -0.001520 | 0.002045  | -0.000120 |
| 4.90263  | 11.56506 | 8.89086 | -0.000440 | 0.002283  | 0.000862  |
| 4.94085  | 7.23830  | 5.18552 | -0.004703 | 0.002240  | 0.000818  |
| 6.17318  | 9.38002  | 5.13173 | 0.002053  | 0.002104  | 0.001821  |
| 6.13864  | 7.99044  | 8.79647 | 0.002386  | -0.000577 | -0.001666 |
| 7.36780  | 10.13760 | 8.89473 | -0.000608 | 0.002755  | 0.000798  |
| 4.94196  | 10.08682 | 5.12700 | 0.004109  | 0.001446  | -0.001152 |
| 6.17284  | 7.94199  | 5.15766 | -0.000069 | 0.000498  | 0.003032  |
| 6.13939  | 9.42660  | 8.86164 | 0.000529  | -0.000304 | -0.002065 |
| 7.36410  | 11.57721 | 8.92935 | -0.000206 | -0.001550 | 0.002906  |
| 7.40426  | 7.23794  | 5.19012 | 0.002142  | 0.001753  | 0.001059  |
| 8.63700  | 9.37970  | 5.14543 | -0.000513 | 0.002955  | 0.000932  |
| 8.60086  | 7.99568  | 8.80617 | 0.001130  | -0.001095 | -0.001168 |
| 9.83068  | 10.14286 | 8.92842 | -0.002245 | 0.001155  | -0.000466 |
| 7.40553  | 10.08627 | 5.14064 | 0.001163  | -0.003651 | 0.003151  |
| 8.63637  | 7.94166  | 5.16555 | 0.002612  | 0.001715  | -0.001406 |
| 8.60077  | 9.43254  | 8.88532 | -0.006135 | 0.003031  | -0.001271 |
| 9.82927  | 11.58244 | 9.00096 | 0.000934  | 0.005799  | 0.001260  |
| 9.86805  | 7.23787  | 5.19489 | -0.000367 | 0.000094  | -0.000240 |
| 11.10106 | 9.37979  | 5.15156 | -0.003840 | -0.001028 | 0.000643  |
| 11.06331 | 7.99411  | 8.80818 | -0.000256 | -0.002094 | 0.000014  |
| 12.29815 | 10.12943 | 8.90340 | -0.000751 | -0.001429 | 0.001654  |

|          |          |         |           |           |           |
|----------|----------|---------|-----------|-----------|-----------|
| 9.86930  | 10.08593 | 5.15631 | -0.005473 | -0.001560 | 0.001406  |
| 11.10021 | 7.94175  | 5.16862 | -0.000630 | -0.003142 | 0.001393  |
| 11.06206 | 9.43062  | 8.88839 | 0.004594  | 0.002359  | 0.002056  |
| 12.30255 | 11.56557 | 8.94694 | 0.002895  | -0.000281 | -0.001513 |
| 12.33169 | 7.23799  | 5.19447 | -0.001021 | 0.000227  | -0.001768 |
| 13.56437 | 9.38021  | 5.14435 | 0.000701  | 0.001647  | -0.000588 |
| 13.52754 | 7.98555  | 8.80171 | -0.000756 | -0.002819 | -0.003117 |
| 14.76233 | 10.12320 | 8.88285 | -0.005341 | 0.000570  | -0.001618 |
| 12.33257 | 10.08637 | 5.15511 | 0.002652  | 0.000463  | -0.001538 |
| 13.56350 | 7.94214  | 5.16485 | -0.000099 | -0.000945 | -0.000371 |
| 13.52731 | 9.42040  | 8.86925 | -0.000069 | 0.003242  | -0.000399 |
| 14.76430 | 11.55727 | 8.90646 | -0.002134 | -0.000206 | 0.001653  |
| 0.01611  | 11.52516 | 5.16621 | -0.001075 | -0.002547 | 0.000383  |
| 1.24770  | 13.67535 | 5.22209 | 0.001921  | -0.002006 | -0.002467 |
| 1.21217  | 12.26335 | 8.89409 | 0.000887  | -0.000555 | 0.001135  |
| 2.43998  | 14.38728 | 8.86748 | -0.002283 | -0.000852 | 0.000848  |
| 0.01699  | 14.35408 | 5.27295 | -0.000545 | -0.001144 | -0.002052 |
| 1.24794  | 12.22963 | 5.17275 | 0.001030  | 0.000870  | -0.001358 |
| 1.21434  | 13.70818 | 8.88771 | 0.001120  | 0.003978  | 0.003594  |
| 2.47958  | 11.52580 | 5.14547 | -0.001619 | -0.000197 | -0.001496 |
| 3.71218  | 13.67636 | 5.19535 | 0.004522  | 0.000939  | 0.001105  |
| 3.66932  | 12.26248 | 8.88184 | -0.002238 | -0.000101 | -0.000638 |

|          |          |         |           |           |           |
|----------|----------|---------|-----------|-----------|-----------|
| 4.89370  | 14.38589 | 8.86075 | 0.003369  | -0.003130 | -0.002607 |
| 2.48000  | 14.35596 | 5.23149 | 0.001256  | -0.001629 | 0.001615  |
| 3.71150  | 12.23022 | 5.15602 | 0.000890  | -0.004506 | 0.001006  |
| 3.66212  | 13.70366 | 8.87117 | -0.005461 | 0.005799  | -0.001151 |
| 4.94290  | 11.52542 | 5.14351 | -0.000068 | -0.001752 | -0.001610 |
| 6.17627  | 13.67505 | 5.20032 | 0.000772  | 0.001053  | 0.000118  |
| 6.13145  | 12.27911 | 8.90591 | 0.004951  | 0.006201  | 0.004424  |
| 7.36614  | 14.42967 | 8.88203 | -0.004883 | -0.003577 | 0.001393  |
| 4.94347  | 14.35627 | 5.21375 | 0.000161  | -0.002444 | 0.001068  |
| 6.17493  | 12.22917 | 5.16623 | -0.001411 | -0.001075 | 0.001523  |
| 6.11879  | 13.72336 | 8.87765 | 0.006247  | 0.005478  | 0.001799  |
| 7.40625  | 11.52413 | 5.16368 | 0.000912  | -0.003271 | 0.000344  |
| 8.63876  | 13.67323 | 5.24377 | 0.001933  | 0.002678  | -0.001258 |
| 8.58939  | 12.29067 | 9.00208 | -0.001906 | -0.001854 | -0.003216 |
| 9.83855  | 14.39048 | 9.30305 | -0.002778 | -0.052174 | -0.037009 |
| 7.40672  | 14.35386 | 5.23530 | -0.001120 | -0.001105 | -0.000686 |
| 8.63820  | 12.22778 | 5.19800 | 0.000306  | -0.001284 | 0.001035  |
| 8.55571  | 13.73596 | 9.04598 | 0.016652  | 0.008718  | 0.009212  |
| 9.86985  | 11.52338 | 5.18893 | 0.001754  | -0.001876 | -0.000117 |
| 11.10099 | 13.67352 | 5.27669 | 0.003113  | -0.000331 | -0.000955 |
| 11.07378 | 12.27333 | 9.00891 | -0.002232 | 0.001797  | -0.005321 |
| 12.30694 | 14.38896 | 9.00333 | 0.002991  | -0.005413 | 0.003066  |

|          |          |          |           |           |           |
|----------|----------|----------|-----------|-----------|-----------|
| 9.86934  | 14.35300 | 5.29564  | 0.002947  | -0.000721 | -0.000282 |
| 11.10161 | 12.22804 | 5.21650  | -0.001135 | -0.002759 | 0.001056  |
| 11.11464 | 13.70636 | 9.07877  | -0.012867 | 0.013702  | 0.004524  |
| 12.33326 | 11.52411 | 5.18815  | -0.000918 | 0.000338  | 0.000531  |
| 13.56430 | 13.67399 | 5.25995  | 0.001688  | 0.000379  | 0.000112  |
| 13.53626 | 12.26601 | 8.93587  | -0.002069 | 0.004089  | 0.001802  |
| 14.76266 | 14.38906 | 8.90426  | -0.002128 | -0.000993 | 0.003661  |
| 12.33397 | 14.35288 | 5.30710  | 0.002706  | -0.002529 | -0.001805 |
| 13.56505 | 12.22870 | 5.20105  | 0.000064  | 0.000096  | -0.001138 |
| 13.54921 | 13.70690 | 8.94399  | -0.001570 | -0.000121 | 0.002943  |
| 9.91126  | 15.53185 | 9.99472  | -0.104427 | -0.974621 | -0.624107 |
| 7.28864  | 16.40884 | 8.69813  | -0.005533 | -0.009035 | -0.005534 |
| 10.02526 | 16.48865 | 10.64498 | 0.117680  | 1.009862  | 0.664171  |

---

|              |  |  |           |          |           |
|--------------|--|--|-----------|----------|-----------|
| total drift: |  |  | -0.043520 | 0.029164 | -0.022399 |
|--------------|--|--|-----------|----------|-----------|

---

FREE ENERGIE OF THE ION-ELECTRON SYSTEM (eV)

---

free energy TOTEN = -1209.38180214 eV

energy without entropy= -1209.38180214 energy(sigma->0) = -1209.38180214

d Force =-0.1046049E-02[-0.303E-01, 0.282E-01] d Energy =-0.3046485E-03-0.741E-03

d Force =-0.1909082E+02[-0.192E+02,-0.189E+02] d Ewald =-0.1909041E+02-0.409E-03

---

POTLOK: cpu time 0.1746: real time 0.1827

---

stress matrix after NEB project (eV)

-17.70877 -0.13210 0.13110

-0.13210 -14.30736 1.12340

0.13110 1.12340 -18.59719

FORCES: max atom, RMS      1.214410      0.138630  
FORCE total and by dimension      1.680802      1.009862  
Stress total and by dimension      29.440616      18.597192

Finite differences progress:

Degree of freedom:    5/ 6

Displacement:            2/ 2

Total:                    10/ 12

LATTYP: Found a simple orthorhombic cell.

ALAT            =      14.7806000000

B/A-ratio    =      1.2466138046

C/A-ratio    =      1.4433717170

Lattice vectors:

A1 = ( -14.7806000000,    0.0000000000,    0.0000000000)

A2 = (    0.0000000000,    0.0000000000, -18.4257000000)

A3 = (    0.0000000000, -21.3339000000,    0.0000000000)

Analysis of symmetry for initial positions (statically):

=====

Subroutine PRICEL returns:

Original cell was already a primitive cell.

Routine SETGRP: Setting up the symmetry group for a  
simple orthorhombic supercell.

Subroutine GETGRP returns: Found 1 space group operations  
(whereof 1 operations were pure point group operations)  
out of a pool of 8 trial point group operations.

The static configuration has the point symmetry C<sub>1</sub>.

Analysis of symmetry for dynamics (positions and initial velocities):

=====

Subroutine PRICEL returns:

Original cell was already a primitive cell.

Routine SETGRP: Setting up the symmetry group for a

simple orthorhombic supercell.

Subroutine GETGRP returns: Found 1 space group operations

(whereof 1 operations were pure point group operations)

out of a pool of 8 trial point group operations.

The dynamic configuration has the point symmetry  $C_1$ .

Analysis of constrained symmetry for selective dynamics:

=====

Subroutine PRICEL returns:

Original cell was already a primitive cell.

Routine SETGRP: Setting up the symmetry group for a

simple orthorhombic supercell.

Subroutine GETGRP returns: Found 1 space group operations

(whereof 1 operations were pure point group operations)

out of a pool of 8 trial point group operations.

The constrained configuration has the point symmetry  $C_1$ .

Analysis of structural, dynamic, and magnetic symmetry:

---

Subroutine PRICEL returns:

Original cell was already a primitive cell.

Routine SETGRP: Setting up the symmetry group for a  
simple orthorhombic supercell.

Subroutine GETGRP returns: Found 1 space group operations

(whereof 1 operations were pure point group operations)

out of a pool of 8 trial point group operations.

The magnetic configuration has the point symmetry C<sub>1</sub> .

Subroutine INISYM returns: Found 1 space group operations

(whereof 1 operations are pure point group operations),

and found 1 'primitive' translations

KPOINTS: KPT-Resolved Value to Generate K-Mesh: 0

Automatic generation of k-mesh.

Space group operators:

| irotn    | det(A)   | alpha    | n_x      | n_y      | n_z      | tau_x    |
|----------|----------|----------|----------|----------|----------|----------|
| tau_y    | tau_z    |          |          |          |          |          |
| 1        | 1.000000 | 0.000000 | 1.000000 | 0.000000 | 0.000000 | 0.000000 |
| 0.000000 | 0.000000 |          |          |          |          |          |

Subroutine IBZKPT returns following result:

=====

Found 1 irreducible k-points:

Following reciprocal coordinates:

| Coordinates |          |          | Weight   |
|-------------|----------|----------|----------|
| 0.000000    | 0.000000 | 0.000000 | 1.000000 |

Following cartesian coordinates:

| Coordinates |          |          | Weight   |
|-------------|----------|----------|----------|
| 0.000000    | 0.000000 | 0.000000 | 1.000000 |

|         |          |                     |          |
|---------|----------|---------------------|----------|
| WAVPRE: | cpu time | 0.1206: real time   | 0.1492   |
| FEWALD: | cpu time | 0.0026: real time   | 0.0026   |
| ORTHCH: | cpu time | 1.0093: real time   | 1.0129   |
| LOOP+:  | cpu time | 188.5243: real time | 189.6346 |

----- Iteration 12( 1) -----

|           |          |                   |        |
|-----------|----------|-------------------|--------|
| POTLOK:   | cpu time | 0.1762: real time | 0.1882 |
| SETDIJ:   | cpu time | 0.0100: real time | 0.0101 |
| EDDIAG:   | cpu time | 1.9257: real time | 1.9315 |
| RMM-DIIS: | cpu time | 7.0840: real time | 7.1174 |
| ORTHCH:   | cpu time | 0.3513: real time | 0.3522 |

DOS: cpu time 0.0004: real time 0.0004

CHARGE: cpu time 0.5260: real time 0.5273

MIXING: cpu time 0.0045: real time 0.0045

-----

LOOP: cpu time 10.0782: real time 10.1316

eigenvalue-minimisations : 1928

total energy-change (2. order) :-0.9440617E-02 (-0.2524042E+00)

number of electron 518.9999718 magnetization 0.9999998

augmentation part 11.7291160 magnetization 0.0542734

Broyden mixing:

rms(total) = 0.43171E-01 rms(broyden)= 0.42953E-01

rms(prec ) = 0.44302E-01

weight for this iteration 100.00

Free energy of the ion-electron system (eV)

-----

alpha Z PSCENC = 233.50077011

Ewald energy TEWEN = 91322.01880280

-Hartree energ DENC = -107331.53261606

-exchange EXHF = 0.00000000

-V(xc)+E(xc) XCENC = 1743.79450979

PAW double counting = 52198.34475733 -52261.27927310

entropy T\*S EENTRO = -0.00000000

eigenvalues EBANDS = -5811.95017134

atomic energy EATOM = 18704.32991668

Solvation Ediel\_sol = 0.00000000

-----

free energy TOTEN = -1202.77330379 eV

energy without entropy = -1202.77330379 energy(sigma->0) = -1202.77330379

-----

----- Iteration 12( 2) -----

POTLOK: cpu time 0.1659: real time 0.1748

SETDIJ: cpu time 0.0102: real time 0.0103

|           |          |          |           |         |
|-----------|----------|----------|-----------|---------|
| EDDIAG:   | cpu time | 1.9203:  | real time | 1.9267  |
| RMM-DIIS: | cpu time | 7.2865:  | real time | 7.3165  |
| ORTHCH:   | cpu time | 0.3567:  | real time | 0.3578  |
| DOS:      | cpu time | 0.0004:  | real time | 0.0004  |
| CHARGE:   | cpu time | 0.5247:  | real time | 0.5265  |
| MIXING:   | cpu time | 0.0044:  | real time | 0.0044  |
| -----     |          |          |           |         |
| LOOP:     | cpu time | 10.2689: | real time | 10.3172 |

eigenvalue-minimisations : 1939

total energy-change (2. order) : 0.4125926E-02 (-0.2521665E-02)

number of electron      518.9999719 magnetization      0.9999998

augmentation part      11.7342518 magnetization      0.0542615

Broyden mixing:

rms(total) = 0.24552E-01      rms(broyden)= 0.24512E-01

rms(prec ) = 0.25848E-01

weight for this iteration      100.00

eigenvalues of (default mixing \* dielectric matrix)

average eigenvalue GAMMA=      1.1569

1.1569

Free energy of the ion-electron system (eV)

-----

alpha Z        PSCENC =        233.50077011

Ewald energy    TEWEN =        91322.01880280

-Hartree energ DENC =    -107330.49244881

-exchange       EXHF =            0.00000000

-V(xc)+E(xc)    XCENC =        1743.75262805

PAW double counting =    52185.18566009    -52248.10174920

entropy T\*S     EENTRO =        -0.00000000

eigenvalues     EBANDS =        -5812.96275758

atomic energy   EATOM =        18704.32991668

Solvation    Ediel\_sol =        0.00000000

-----

free energy     TOTEN =        -1202.76917787 eV

energy without entropy =    -1202.76917787    energy(sigma->0) =    -1202.76917787

-----

----- Iteration 12( 3) -----

|           |          |         |           |        |
|-----------|----------|---------|-----------|--------|
| POTLOK:   | cpu time | 0.1670: | real time | 0.1750 |
| SETDIJ:   | cpu time | 0.0101: | real time | 0.0102 |
| EDDIAG:   | cpu time | 1.9174: | real time | 1.9236 |
| RMM-DIIS: | cpu time | 7.3526: | real time | 7.3768 |
| ORTHCH:   | cpu time | 0.3569: | real time | 0.3578 |
| DOS:      | cpu time | 0.0003: | real time | 0.0003 |
| CHARGE:   | cpu time | 0.5238: | real time | 0.5255 |
| MIXING:   | cpu time | 0.0052: | real time | 0.0052 |

-----

|       |          |          |           |         |
|-------|----------|----------|-----------|---------|
| LOOP: | cpu time | 10.3335: | real time | 10.3745 |
|-------|----------|----------|-----------|---------|

eigenvalue-minimisations : 1959

total energy-change (2. order) : 0.1017449E-02 (-0.1022643E-03)

|                    |             |               |           |
|--------------------|-------------|---------------|-----------|
| number of electron | 518.9999719 | magnetization | 0.9999998 |
|--------------------|-------------|---------------|-----------|

|                   |            |               |           |
|-------------------|------------|---------------|-----------|
| augmentation part | 11.7329353 | magnetization | 0.0542644 |
|-------------------|------------|---------------|-----------|

Broyden mixing:

rms(total) = 0.14670E-01      rms(broyden)= 0.14659E-01

rms(prec ) = 0.15121E-01

weight for this iteration      100.00

eigenvalues of (default mixing \* dielectric matrix)

average eigenvalue GAMMA=    1.5216

0.7254   2.3178

Free energy of the ion-electron system (eV)

-----

alpha Z          PSCENC =          233.50077011

Ewald energy    TEWEN =          91322.01880280

-Hartree energ DENC =   -107329.80519785

-exchange       EXHF =            0.00000000

-V(xc)+E(xc)    XCENC =          1743.75103550

PAW double counting =    52176.00927517   -52238.92224002

entropy T\*S     EENTRO =          -0.00000000

eigenvalues     EBANDS =          -5813.65052281

atomic energy   EATOM =          18704.32991668

Solvation    Ediel\_sol =          0.00000000

-----

free energy     TOTEN =          -1202.76816042 eV

energy without entropy = -1202.76816042 energy(sigma->0) = -1202.76816042

-----

----- Iteration 12( 4) -----

|           |          |         |           |        |
|-----------|----------|---------|-----------|--------|
| POTLOK:   | cpu time | 0.1641: | real time | 0.1880 |
| SETDIJ:   | cpu time | 0.0101: | real time | 0.0101 |
| EDDIAG:   | cpu time | 1.9198: | real time | 1.9261 |
| RMM-DIIS: | cpu time | 7.2843: | real time | 7.3102 |
| ORTHCH:   | cpu time | 0.3539: | real time | 0.3549 |
| DOS:      | cpu time | 0.0004: | real time | 0.0004 |
| CHARGE:   | cpu time | 0.5228: | real time | 0.5248 |
| MIXING:   | cpu time | 0.0054: | real time | 0.0054 |

-----

|       |          |          |           |         |
|-------|----------|----------|-----------|---------|
| LOOP: | cpu time | 10.2608: | real time | 10.3197 |
|-------|----------|----------|-----------|---------|

eigenvalue-minimisations : 1940

total energy-change (2. order) : 0.1631238E-03 (-0.6483231E-04)

number of electron      518.9999719 magnetization      0.9999998

augmentation part      11.7330367 magnetization      0.0542731

Broyden mixing:

rms(total) = 0.46941E-02      rms(broyden)= 0.46894E-02

rms(prec ) = 0.50848E-02

weight for this iteration      100.00

eigenvalues of (default mixing \* dielectric matrix)

average eigenvalue GAMMA=      1.4548

2.2857    1.2434    0.8354

Free energy of the ion-electron system (eV)

-----

alpha Z      PSCENC =      233.50077011

Ewald energy      TEWEN =      91322.01880280

-Hartree energ DENC =      -107328.93906318

-exchange      EXHF =      0.00000000

-V(xc)+E(xc)      XCENC =      1743.73883165

PAW double counting = 52164.42501333 -52227.33271664

entropy T\*S EENTRO = -0.00000000

eigenvalues EBANDS = -5814.50955204

atomic energy EATOM = 18704.32991668

Solvation Ediel\_sol = 0.00000000

-----  
free energy TOTEN = -1202.76799729 eV

energy without entropy = -1202.76799729 energy(sigma->0) = -1202.76799729

----- Iteration 12( 5) -----

POTLOK: cpu time 0.1653: real time 0.1676

SETDIJ: cpu time 0.0101: real time 0.0101

EDDIAG: cpu time 1.9225: real time 1.9289

|           |          |          |           |         |
|-----------|----------|----------|-----------|---------|
| RMM-DIIS: | cpu time | 7.0807:  | real time | 7.1202  |
| ORTHCH:   | cpu time | 0.3530:  | real time | 0.3540  |
| DOS:      | cpu time | 0.0004:  | real time | 0.0004  |
| CHARGE:   | cpu time | 0.5240:  | real time | 0.5260  |
| MIXING:   | cpu time | 0.0055:  | real time | 0.0055  |
| -----     |          |          |           |         |
| LOOP:     | cpu time | 10.0615: | real time | 10.1128 |

eigenvalue-minimisations : 1925

total energy-change (2. order) :-0.1314357E-04 (-0.1232601E-04)

number of electron 518.9999719 magnetization 0.9999998

augmentation part 11.7336697 magnetization 0.0542753

Broyden mixing:

rms(total) = 0.19032E-02 rms(broyden)= 0.18993E-02

rms(prec ) = 0.21851E-02

weight for this iteration 100.00

eigenvalues of (default mixing \* dielectric matrix)

average eigenvalue GAMMA= 1.4931

2.2462 2.0093 0.8584 0.8584

Free energy of the ion-electron system (eV)

-----

alpha Z        PSCENC =        233.50077011

Ewald energy    TEWEN =        91322.01880280

-Hartree energy DENC =   -107328.79126129

-exchange       EXHF =            0.00000000

-V(xc)+E(xc)   XCENC =        1743.73737350

PAW double counting =    52163.25566901   -52226.16359741

entropy T\*S     EENTRO =        -0.00000000

eigenvalues     EBANDS =       -5814.65568384

atomic energy   EATOM =        18704.32991668

Solvation    Ediel\_sol =            0.00000000

-----

free energy     TOTEN =       -1202.76801044 eV

energy without entropy =   -1202.76801044    energy(sigma->0) =   -1202.76801044

-----

----- Iteration 12( 6) -----

|           |          |         |           |        |
|-----------|----------|---------|-----------|--------|
| POTLOK:   | cpu time | 0.1671: | real time | 0.1771 |
| SETDIJ:   | cpu time | 0.0101: | real time | 0.0101 |
| EDDIAG:   | cpu time | 1.9218: | real time | 1.9286 |
| RMM-DIIS: | cpu time | 7.2013: | real time | 7.2586 |
| ORTHCH:   | cpu time | 0.3522: | real time | 0.3533 |
| DOS:      | cpu time | 0.0004: | real time | 0.0004 |
| CHARGE:   | cpu time | 0.5235: | real time | 0.5253 |
| MIXING:   | cpu time | 0.0059: | real time | 0.0060 |

-----

|       |          |          |           |         |
|-------|----------|----------|-----------|---------|
| LOOP: | cpu time | 10.1824: | real time | 10.2594 |
|-------|----------|----------|-----------|---------|

eigenvalue-minimisations : 1931

total energy-change (2. order) :-0.3279449E-04 (-0.1274355E-05)

|                    |             |               |           |
|--------------------|-------------|---------------|-----------|
| number of electron | 518.9999719 | magnetization | 0.9999998 |
|--------------------|-------------|---------------|-----------|

|                   |            |               |           |
|-------------------|------------|---------------|-----------|
| augmentation part | 11.7334254 | magnetization | 0.0542774 |
|-------------------|------------|---------------|-----------|

Broyden mixing:

|                          |                           |
|--------------------------|---------------------------|
| rms(total) = 0.60806E-03 | rms(broyden)= 0.60715E-03 |
|--------------------------|---------------------------|

rms( prec ) = 0.87089E-03

weight for this iteration      100.00

eigenvalues of (default mixing \* dielectric matrix)

average eigenvalue GAMMA=    1.4623

2.5188   1.8617   0.8699   0.8699   1.1913

Free energy of the ion-electron system (eV)

-----  
alpha Z          PSCENC =          233.50077011

Ewald energy    TEWEN =          91322.01880280

-Hartree energ DENC =   -107328.65603555

-exchange       EXHF =           0.00000000

-V(xc)+E(xc)   XCENC =          1743.73912859

PAW double counting =    52162.56059279   -52225.46959484

entropy T\*S     EENTRO =          -0.00000000

eigenvalues     EBANDS =          -5814.79162382

atomic energy   EATOM =          18704.32991668

Solvation    Ediel\_sol =          0.00000000

-----  
free energy      TOTEN =          -1202.76804323 eV

energy without entropy = -1202.76804323 energy(sigma->0) = -1202.76804323

-----

----- Iteration 12( 7) -----

|           |          |         |           |        |
|-----------|----------|---------|-----------|--------|
| POTLOK:   | cpu time | 0.1665: | real time | 0.1917 |
| SETDIJ:   | cpu time | 0.0100: | real time | 0.0101 |
| EDDIAG:   | cpu time | 1.9190: | real time | 1.9257 |
| RMM-DIIS: | cpu time | 6.5087: | real time | 6.5387 |
| ORTHCH:   | cpu time | 0.3520: | real time | 0.3533 |
| DOS:      | cpu time | 0.0004: | real time | 0.0004 |
| CHARGE:   | cpu time | 0.5234: | real time | 0.5249 |
| MIXING:   | cpu time | 0.0060: | real time | 0.0060 |
| -----     |          |         |           |        |
| LOOP:     | cpu time | 9.4858: | real time | 9.5508 |

eigenvalue-minimisations : 1772

total energy-change (2. order) :-0.3137431E-04 (-0.3039900E-06)

number of electron 518.9999719 magnetization 0.9999998

augmentation part 11.7333903 magnetization 0.0542779

Broyden mixing:

rms(total) = 0.36607E-03 rms(broyden)= 0.36583E-03

rms(prec ) = 0.59502E-03

weight for this iteration 100.00

eigenvalues of (default mixing \* dielectric matrix)

average eigenvalue GAMMA= 1.4373

2.5367 1.8843 1.6823 0.8924 0.8924 0.7360

Free energy of the ion-electron system (eV)

-----

alpha Z PSCENC = 233.50077011

Ewald energy TEWEN = 91322.01880280

-Hartree energ DENC = -107328.53773429

-exchange EXHF = 0.00000000

-V(xc)+E(xc) XCENC = 1743.73828212

PAW double counting = 52162.43095586 -52225.33984589

entropy T\*S    EENTRO =        -0.00000000

eigenvalues    EBANDS =       -5814.90922199

atomic energy  EATOM  =       18704.32991668

Solvation    Ediel\_sol  =        0.00000000

-----

free energy    TOTEN  =       -1202.76807461 eV

energy without entropy =    -1202.76807461    energy(sigma->0) =    -1202.76807461

-----

----- Iteration    12( 8) -----

POTLOK:    cpu time    0.1632: real time    0.1667

SETDIJ:    cpu time    0.0100: real time    0.0100

EDDIAG:    cpu time    1.9203: real time    1.9271

RMM-DIIS:    cpu time    6.2808: real time    6.3157

ORTHCH:  cpu time     0.3507: real time     0.3521

  DOS:  cpu time     0.0004: real time     0.0004

CHARGE:  cpu time     0.5227: real time     0.5246

MIXING:  cpu time     0.0063: real time     0.0063

-----

  LOOP:  cpu time     9.2545: real time     9.3029

eigenvalue-minimisations  :  1720

total energy-change (2. order) :-0.3744439E-04  (-0.2224000E-06)

number of electron       518.9999719 magnetization       0.9999998

augmentation part       11.7334066 magnetization       0.0542778

Broyden mixing:

rms(total) = 0.20505E-03     rms(broyden)= 0.20497E-03

rms(prec ) = 0.39770E-03

weight for this iteration     100.00

eigenvalues of (default mixing \* dielectric matrix)

average eigenvalue GAMMA=    1.4587

2.5949  2.5949  1.4519  1.1368  0.8776  0.8776  0.6774

Free energy of the ion-electron system (eV)

---

alpha Z        PSCENC =        233.50077011

Ewald energy    TEWEN =        91322.01880280

-Hartree energ DENC =    -107328.42699182

-exchange       EXHF =            0.00000000

-V(xc)+E(xc)    XCENC =        1743.73757414

PAW double counting =    52162.56398330    -52225.47280300

entropy T\*S     EENTRO =        -0.00000000

eigenvalues     EBANDS =        -5815.01936426

atomic energy   EATOM =        18704.32991668

Solvation    Ediel\_sol =        0.00000000

---

free energy     TOTEN =        -1202.76811205 eV

energy without entropy =    -1202.76811205    energy(sigma->0) =    -1202.76811205

---

----- Iteration 12( 9) -----

|           |          |         |           |        |
|-----------|----------|---------|-----------|--------|
| POTLOK:   | cpu time | 0.1620: | real time | 0.1633 |
| SETDIJ:   | cpu time | 0.0100: | real time | 0.0100 |
| EDDIAG:   | cpu time | 1.9183: | real time | 1.9252 |
| RMM-DIIS: | cpu time | 6.1617: | real time | 6.2000 |
| ORTHCH:   | cpu time | 0.3504: | real time | 0.3519 |
| DOS:      | cpu time | 0.0003: | real time | 0.0003 |
| CHARGE:   | cpu time | 0.5227: | real time | 0.5246 |
| MIXING:   | cpu time | 0.0069: | real time | 0.0069 |
| -----     |          |         |           |        |
| LOOP:     | cpu time | 9.1323: | real time | 9.1823 |

eigenvalue-minimisations : 1682

total energy-change (2. order) :-0.3909832E-04 (-0.2166312E-06)

number of electron 518.9999719 magnetization 0.9999998

augmentation part 11.7334065 magnetization 0.0542785

Broyden mixing:

rms(total) = 0.14515E-03 rms(broyden)= 0.14508E-03

rms(prec ) = 0.26573E-03

weight for this iteration      100.00

eigenvalues of (default mixing \* dielectric matrix)

average eigenvalue GAMMA=    1.5254

3.0812  2.6213  1.8146  1.1142  1.1142  0.9010  0.9010  0.6562

Free energy of the ion-electron system (eV)

-----

alpha Z          PSCENC =          233.50077011

Ewald energy    TEWEN  =          91322.01880280

-Hartree energ DENC  =    -107328.31751354

-exchange        EXHF    =          0.00000000

-V(xc)+E(xc)    XCENC  =          1743.73699289

PAW double counting  =    52162.69171869  -52225.60047768

entropy T\*S      EENTRO =          -0.00000000

eigenvalues      EBANDS =          -5815.12836110

atomic energy    EATOM  =          18704.32991668

Solvation    Ediel\_sol  =          0.00000000

-----

free energy      TOTEN  =          -1202.76815115 eV

energy without entropy =    -1202.76815115    energy(sigma->0) =    -1202.76815115

-----

----- Iteration 12( 10) -----

|           |          |         |           |        |
|-----------|----------|---------|-----------|--------|
| POTLOK:   | cpu time | 0.1638: | real time | 0.1661 |
| SETDIJ:   | cpu time | 0.0102: | real time | 0.0102 |
| EDDIAG:   | cpu time | 1.9212: | real time | 1.9278 |
| RMM-DIIS: | cpu time | 6.1855: | real time | 6.2183 |
| ORTHCH:   | cpu time | 0.3501: | real time | 0.3514 |
| DOS:      | cpu time | 0.0004: | real time | 0.0004 |
| CHARGE:   | cpu time | 0.5226: | real time | 0.5242 |
| MIXING:   | cpu time | 0.0069: | real time | 0.0069 |
| -----     |          |         |           |        |
| LOOP:     | cpu time | 9.1607: | real time | 9.2053 |

eigenvalue-minimisations : 1692

total energy-change (2. order) :-0.3812843E-04 (-0.2611983E-06)

number of electron      518.9999719 magnetization      0.9999998

augmentation part      11.7333975 magnetization      0.0542789

Broyden mixing:

rms(total) = 0.73886E-04      rms(broyden)= 0.73779E-04

rms(prec ) = 0.13536E-03

weight for this iteration      100.00

eigenvalues of (default mixing \* dielectric matrix)

average eigenvalue GAMMA=      1.6351

4.2653   2.5967   2.1399   1.2620   1.2620   0.8851   0.8851   0.7771   0.6430

Free energy of the ion-electron system (eV)

-----

alpha Z      PSCENC =      233.50077011

Ewald energy      TEWEN =      91322.01880280

-Hartree energ DENC      =      -107328.20708543

-exchange      EXHF =      0.00000000

-V(xc)+E(xc)      XCENC =      1743.73636290

PAW double counting      =      52162.77660397      -52225.68524400

entropy T\*S      EENTRO =      -0.00000000

eigenvalues EBANDS = -5815.23831631

atomic energy EATOM = 18704.32991668

Solvation Ediel\_sol = 0.00000000

-----  
free energy TOTEN = -1202.76818928 eV

energy without entropy = -1202.76818928 energy(sigma->0) = -1202.76818928

----- Iteration 12( 11) -----

POTLOK: cpu time 0.1662: real time 0.1878

SETDIJ: cpu time 0.0101: real time 0.0102

EDDIAG: cpu time 1.9212: real time 1.9277

RMM-DIIS: cpu time 5.8924: real time 5.9192

ORTHCH: cpu time 0.3525: real time 0.3537

DOS: cpu time 0.0004: real time 0.0004

CHARGE: cpu time 0.5232: real time 0.5251

MIXING: cpu time 0.0075: real time 0.0075

-----

LOOP: cpu time 8.8735: real time 8.9316

eigenvalue-minimisations : 1595

total energy-change (2. order) :-0.1533494E-04 (-0.7861592E-07)

number of electron 518.9999719 magnetization 0.9999998

augmentation part 11.7333912 magnetization 0.0542792

Broyden mixing:

rms(total) = 0.56059E-04 rms(broyden)= 0.56005E-04

rms(prec ) = 0.89655E-04

weight for this iteration 100.00

eigenvalues of (default mixing \* dielectric matrix)

average eigenvalue GAMMA= 1.6863

5.1847 2.5924 2.0647 1.6900 1.1228 0.9216 0.9216 1.0113 0.7184 0.6350

Free energy of the ion-electron system (eV)

-----

alpha Z        PSCENC =        233.50077011  
Ewald energy    TEWEN =        91322.01880280  
-Hartree energ DENC =    -107328.15656903  
-exchange       EXHF =            0.00000000  
-V(xc)+E(xc)   XCENC =        1743.73616743  
PAW double counting =    52162.78564190   -52225.69427911  
entropy T\*S     EENTRO =        -0.00000000  
eigenvalues     EBANDS =        -5815.28865539  
atomic energy   EATOM =        18704.32991668  
Solvation    Ediel\_sol =        0.00000000

-----

free energy     TOTEN =        -1202.76820461 eV

energy without entropy =    -1202.76820461    energy(sigma->0) =    -1202.76820461

-----

|           |          |         |           |        |
|-----------|----------|---------|-----------|--------|
| POTLOK:   | cpu time | 0.1653: | real time | 0.1717 |
| SETDIJ:   | cpu time | 0.0101: | real time | 0.0101 |
| EDDIAG:   | cpu time | 1.9239: | real time | 1.9304 |
| RMM-DIIS: | cpu time | 5.4357: | real time | 5.4615 |
| ORTHCH:   | cpu time | 0.3510: | real time | 0.3522 |
| DOS:      | cpu time | 0.0004: | real time | 0.0004 |
| CHARGE:   | cpu time | 0.5221: | real time | 0.5238 |
| MIXING:   | cpu time | 0.0077: | real time | 0.0077 |
| -----     |          |         |           |        |
| LOOP:     | cpu time | 8.4162: | real time | 8.4577 |

eigenvalue-minimisations : 1476

total energy-change (2. order) :-0.8026072E-05 (-0.2431843E-07)

number of electron 518.9999719 magnetization 0.9999998

augmentation part 11.7333914 magnetization 0.0542792

Broyden mixing:

rms(total) = 0.33505E-04 rms(broyden)= 0.33490E-04

rms(prec ) = 0.58712E-04

weight for this iteration 100.00

eigenvalues of (default mixing \* dielectric matrix)

average eigenvalue GAMMA= 1.8164

6.3059 2.7869 2.3870 2.0160 1.2849 0.8975 0.8975 1.1035 0.9876 0.6848

0.6287

Free energy of the ion-electron system (eV)

-----  
alpha Z PSCENC = 233.50077011

Ewald energy TEWEN = 91322.01880280

-Hartree energ DENC = -107328.13874723

-exchange EXHF = 0.00000000

-V(xc)+E(xc) XCENC = 1743.73613434

PAW double counting = 52162.77081228 -52225.67947032

entropy T\*S EENTRO = -0.00000000

eigenvalues EBANDS = -5815.30643129

atomic energy EATOM = 18704.32991668

Solvation Ediel\_sol = 0.00000000

-----  
free energy TOTEN = -1202.76821264 eV

energy without entropy = -1202.76821264 energy(sigma->0) = -1202.76821264

-----

----- Iteration 12( 13) -----

|           |          |         |           |        |
|-----------|----------|---------|-----------|--------|
| POTLOK:   | cpu time | 0.1666: | real time | 0.1804 |
| SETDIJ:   | cpu time | 0.0100: | real time | 0.0101 |
| EDDIAG:   | cpu time | 1.9119: | real time | 1.9399 |
| RMM-DIIS: | cpu time | 5.5377: | real time | 5.5562 |
| ORTHCH:   | cpu time | 0.3515: | real time | 0.3527 |
| DOS:      | cpu time | 0.0004: | real time | 0.0004 |
| CHARGE:   | cpu time | 0.5238: | real time | 0.5256 |
| MIXING:   | cpu time | 0.0079: | real time | 0.0079 |
| -----     |          |         |           |        |
| LOOP:     | cpu time | 8.5097: | real time | 8.5732 |

eigenvalue-minimisations : 1492

total energy-change (2. order) :-0.7553095E-05 (-0.2671113E-07)

number of electron      518.9999719 magnetization      0.9999998

augmentation part      11.7333944 magnetization      0.0542791

Broyden mixing:

rms(total) = 0.22873E-04      rms(broyden)= 0.22856E-04

rms(prec ) = 0.35081E-04

weight for this iteration      100.00

eigenvalues of (default mixing \* dielectric matrix)

average eigenvalue GAMMA=      1.8354

6.7359   3.1271   2.4819   1.8401   1.6963   1.0738   1.0738   0.9109   0.9109   0.8717

0.6747   0.6276

Free energy of the ion-electron system (eV)

-----

alpha Z      PSCENC =      233.50077011

Ewald energy      TEWEN =      91322.01880280

-Hartree energ      DENC =      -107328.12348063

-exchange      EXHF =      0.00000000

-V(xc)+E(xc)      XCENC =      1743.73608478

PAW double counting =      52162.75837590      -52225.66703608

entropy T\*S    EENTRO =        -0.00000000

eigenvalues    EBANDS =        -5815.32165375

atomic energy  EATOM  =        18704.32991668

Solvation    Ediel\_sol  =        0.00000000

-----  
free energy    TOTEN  =        -1202.76822019 eV

energy without entropy =    -1202.76822019    energy(sigma->0) =    -1202.76822019

-----  
----- Iteration        12( 14) -----

POTLOK:    cpu time        0.1652: real time        0.1804

SETDIJ:    cpu time        0.0101: real time        0.0101

EDDIAG:    cpu time        1.9263: real time        1.9330

RMM-DIIS:    cpu time        5.0539: real time        5.0754

ORTHCH: cpu time 0.3532: real time 0.3544

DOS: cpu time 0.0004: real time 0.0004

CHARGE: cpu time 0.5236: real time 0.5254

MIXING: cpu time 0.0082: real time 0.0082

-----

LOOP: cpu time 8.0408: real time 8.0872

eigenvalue-minimisations : 1387

total energy-change (2. order) :-0.3269808E-05 (-0.8480622E-08)

number of electron 518.9999719 magnetization 0.9999998

augmentation part 11.7333941 magnetization 0.0542792

Broyden mixing:

rms(total) = 0.14436E-04 rms(broyden)= 0.14429E-04

rms(prec ) = 0.21010E-04

weight for this iteration 100.00

eigenvalues of (default mixing \* dielectric matrix)

average eigenvalue GAMMA= 1.9295

7.3403 3.8227 2.5323 2.2887 1.8798 1.3475 1.0261 1.0261 0.8915 0.8915

0.7459 0.6639 0.6270

Free energy of the ion-electron system (eV)

-----

alpha Z        PSCENC =        233.50077011

Ewald energy    TEWEN =        91322.01880280

-Hartree energy DENC =   -107328.11842564

-exchange       EXHF =            0.00000000

-V(xc)+E(xc)    XCENC =        1743.73607288

PAW double counting =    52162.76145527   -52225.67010941

entropy T\*S     EENTRO =        -0.00000000

eigenvalues     EBANDS =       -5815.32670615

atomic energy   EATOM =        18704.32991668

Solvation    Ediel\_sol =        0.00000000

-----

free energy     TOTEN =       -1202.76822346 eV

energy without entropy =   -1202.76822346    energy(sigma->0) =   -1202.76822346

-----

----- Iteration 12( 15) -----

|           |          |         |           |        |
|-----------|----------|---------|-----------|--------|
| POTLOK:   | cpu time | 0.1698: | real time | 0.1867 |
| SETDIJ:   | cpu time | 0.0101: | real time | 0.0101 |
| EDDIAG:   | cpu time | 1.9197: | real time | 1.9260 |
| RMM-DIIS: | cpu time | 4.9270: | real time | 4.9612 |
| ORTHCH:   | cpu time | 0.3510: | real time | 0.3520 |
| DOS:      | cpu time | 0.0003: | real time | 0.0003 |
| CHARGE:   | cpu time | 0.5232: | real time | 0.5250 |
| MIXING:   | cpu time | 0.0087: | real time | 0.0088 |
| -----     |          |         |           |        |
| LOOP:     | cpu time | 7.9099: | real time | 7.9701 |

eigenvalue-minimisations : 1351

total energy-change (2. order) :-0.1773478E-05 (-0.3489837E-08)

number of electron 518.9999719 magnetization 0.9999998

augmentation part 11.7333925 magnetization 0.0542792

Broyden mixing:

rms(total) = 0.69782E-05 rms(broyden)= 0.69695E-05

rms(prec ) = 0.11178E-04

weight for this iteration 100.00

eigenvalues of (default mixing \* dielectric matrix)

average eigenvalue GAMMA= 1.9531

7.7598 4.3464 2.6453 2.4390 1.6705 1.6705 1.0618 1.0618 0.8933 0.8933

0.9141 0.7076 0.6527 0.6268

Free energy of the ion-electron system (eV)

-----

alpha Z PSCENC = 233.50077011

Ewald energy TEWEN = 91322.01880280

-Hartree energy DENC = -107328.11687854

-exchange EXHF = 0.00000000

-V(xc)+E(xc) XCENC = 1743.73609375

PAW double counting = 52162.76479761 -52225.67345662

entropy T\*S EENTRO = -0.00000000

eigenvalues EBANDS = -5815.32827102

atomic energy EATOM = 18704.32991668

Solvation Ediel\_sol = 0.00000000

-----

free energy TOTEN = -1202.76822523 eV

energy without entropy = -1202.76822523 energy(sigma->0) = -1202.76822523

-----

----- Iteration 12( 16) -----

|           |          |         |           |        |
|-----------|----------|---------|-----------|--------|
| POTLOK:   | cpu time | 0.1691: | real time | 0.1732 |
| SETDIJ:   | cpu time | 0.0100: | real time | 0.0101 |
| EDDIAG:   | cpu time | 1.9193: | real time | 1.9255 |
| RMM-DIIS: | cpu time | 4.7120: | real time | 4.7275 |
| ORTHCH:   | cpu time | 0.3512: | real time | 0.3522 |
| DOS:      | cpu time | 0.0004: | real time | 0.0004 |
| CHARGE:   | cpu time | 0.5239: | real time | 0.5259 |
| MIXING:   | cpu time | 0.0092: | real time | 0.0092 |

-----

|       |          |         |           |        |
|-------|----------|---------|-----------|--------|
| LOOP: | cpu time | 7.6951: | real time | 7.7241 |
|-------|----------|---------|-----------|--------|

eigenvalue-minimisations : 1233

total energy-change (2. order) :-0.8491006E-06 (-0.9388001E-09)

number of electron      518.9999719 magnetization      0.9999998

augmentation part      11.7333923 magnetization      0.0542792

Broyden mixing:

rms(total) = 0.54499E-05      rms(broyden)= 0.54482E-05

rms(prec ) = 0.81842E-05

weight for this iteration      100.00

eigenvalues of (default mixing \* dielectric matrix)

average eigenvalue GAMMA=      1.9641

7.8798   4.7549   2.7009   2.4137   2.0636   1.4976   1.4602   1.0400   1.0400   0.8888

0.8888   0.8672   0.6930   0.6460   0.6267

Free energy of the ion-electron system (eV)

-----

alpha Z      PSCENC =      233.50077011

Ewald energy      TEWEN =      91322.01880280

-Hartree energ DENC      =      -107328.11633591

-exchange      EXHF =      0.00000000

-V(xc)+E(xc) XCENC = 1743.73610080

PAW double counting = 52162.76617485 -52225.67483475

entropy T\*S EENTRO = -0.00000000

eigenvalues EBANDS = -5815.32882066

atomic energy EATOM = 18704.32991668

Solvation Ediel\_sol = 0.00000000

-----

free energy TOTEN = -1202.76822608 eV

energy without entropy = -1202.76822608 energy(sigma->0) = -1202.76822608

-----

----- Iteration 12( 17) -----

POTLOK: cpu time 0.1638: real time 0.1733

SETDIJ: cpu time 0.0100: real time 0.0101

|           |          |         |           |        |
|-----------|----------|---------|-----------|--------|
| EDDIAG:   | cpu time | 1.9277: | real time | 1.9345 |
| RMM-DIIS: | cpu time | 4.7188: | real time | 4.7450 |
| ORTHCH:   | cpu time | 0.3527: | real time | 0.3539 |
| DOS:      | cpu time | 0.0004: | real time | 0.0004 |
| CHARGE:   | cpu time | 0.5223: | real time | 0.5239 |
| MIXING:   | cpu time | 0.0096: | real time | 0.0097 |
| -----     |          |         |           |        |
| LOOP:     | cpu time | 7.7052: | real time | 7.7507 |

eigenvalue-minimisations : 1278

total energy-change (2. order) :-0.1024862E-05 (-0.5486465E-09)

number of electron 518.9999719 magnetization 0.9999998

augmentation part 11.7333928 magnetization 0.0542791

Broyden mixing:

rms(total) = 0.27119E-05 rms(broyden)= 0.27092E-05

rms(prec ) = 0.44782E-05

weight for this iteration 100.00

eigenvalues of (default mixing \* dielectric matrix)

average eigenvalue GAMMA= 2.0006

8.0710 5.3197 2.9453 2.5749 2.2901 1.6138 1.6138 1.0798 1.0798 0.8918

0.8918 0.9183 0.7743 0.6791 0.6265 0.6389

Free energy of the ion-electron system (eV)

-----

alpha Z        PSCENC =        233.50077011

Ewald energy    TEWEN =        91322.01880280

-Hartree energ DENC =   -107328.11567748

-exchange       EXHF =            0.00000000

-V(xc)+E(xc)    XCENC =        1743.73609757

PAW double counting =    52162.76771280   -52225.67636942

entropy T\*S     EENTRO =        -0.00000000

eigenvalues     EBANDS =       -5815.32948017

atomic energy   EATOM =        18704.32991668

Solvation    Ediel\_sol =        0.00000000

-----

free energy     TOTEN =       -1202.76822711 eV

energy without entropy =   -1202.76822711    energy(sigma->0) =   -1202.76822711

-----

----- Iteration 12( 18) -----

|           |          |         |           |        |
|-----------|----------|---------|-----------|--------|
| POTLOK:   | cpu time | 0.1644: | real time | 0.1665 |
| SETDIJ:   | cpu time | 0.0100: | real time | 0.0100 |
| EDDIAG:   | cpu time | 1.9223: | real time | 1.9292 |
| RMM-DIIS: | cpu time | 4.5016: | real time | 4.5286 |
| ORTHCH:   | cpu time | 0.3518: | real time | 0.3530 |
| DOS:      | cpu time | 0.0004: | real time | 0.0004 |
| CHARGE:   | cpu time | 0.5223: | real time | 0.5240 |
| MIXING:   | cpu time | 0.0100: | real time | 0.0101 |
| -----     |          |         |           |        |
| LOOP:     | cpu time | 7.4828: | real time | 7.5217 |

eigenvalue-minimisations : 1160

total energy-change (2. order) :-0.4529466E-06 (-0.2723475E-09)

number of electron 518.9999719 magnetization 0.9999998

augmentation part 11.7333928 magnetization 0.0542792

Broyden mixing:

rms(total) = 0.17672E-05      rms(broyden)= 0.17661E-05

rms(prec ) = 0.28336E-05

weight for this iteration      100.00

eigenvalues of (default mixing \* dielectric matrix)

average eigenvalue GAMMA=    2.0044

8.2981   5.6218   3.2566   2.6213   2.0847   1.9393   1.5230   1.2528   1.0471   1.0471

0.8921   0.8921   0.9414   0.7214   0.6734   0.6263   0.6354

Free energy of the ion-electron system (eV)

-----

alpha Z          PSCENC =          233.50077011

Ewald energy    TEWEN =          91322.01880280

-Hartree energy DENC =   -107328.11551638

-exchange       EXHF =           0.00000000

-V(xc)+E(xc)   XCENC =          1743.73610189

PAW double counting =    52162.76810422   -52225.67676157

entropy T\*S     EENTRO =          -0.00000000

eigenvalues     EBANDS =       -5815.32964532

atomic energy   EATOM =          18704.32991668

Solvation    Ediel\_sol =          0.00000000

-----  
free energy    TOTEN    =    -1202.76822756 eV

energy without entropy =    -1202.76822756    energy(sigma->0) =    -1202.76822756

----- Iteration    12( 19) -----

|           |          |         |           |        |
|-----------|----------|---------|-----------|--------|
| POTLOK:   | cpu time | 0.1688: | real time | 0.1891 |
| SETDIJ:   | cpu time | 0.0101: | real time | 0.0101 |
| EDDIAG:   | cpu time | 1.9202: | real time | 1.9267 |
| RMM-DIIS: | cpu time | 4.2597: | real time | 4.2754 |
| ORTHCH:   | cpu time | 0.3525: | real time | 0.3538 |
| DOS:      | cpu time | 0.0004: | real time | 0.0004 |

-----  
LOOP:    cpu time    6.7116: real time    6.7553

eigenvalue-minimisations : 1024

total energy-change (2. order) :-0.9591895E-07 (-0.8834711E-10)

number of electron      518.9999719 magnetization      0.9999998

augmentation part      11.7333928 magnetization      0.0542792

Free energy of the ion-electron system (eV)

-----

alpha Z      PSCENC =      233.50077011

Ewald energy      TEWEN =      91322.01880280

-Hartree energ      DENC =      -107328.11549627

-exchange      EXHF =      0.00000000

-V(xc)+E(xc)      XCENC =      1743.73610714

PAW double counting      =      52162.76730472      -52225.67596369

entropy T\*S      EENTRO =      -0.00000000

eigenvalues      EBANDS =      -5815.32966915

atomic energy      EATOM =      18704.32991668

Solvation      Ediel\_sol =      0.00000000

-----

free energy      TOTEN =      -1202.76822766 eV

energy without entropy =      -1202.76822766      energy(sigma->0) =      -1202.76822766

---

average (electrostatic) potential at core

the test charge radii are      0.5201   0.6991   1.0621   0.7215

(the norm of the test charge is                      1.0000)

|             |             |             |             |             |
|-------------|-------------|-------------|-------------|-------------|
| 1 -40.7548  | 2 -40.7528  | 3 -40.7540  | 4 -40.7528  | 5 -40.7547  |
| 6 -40.7570  | 7 -40.7544  | 8 -40.7622  | 9 -40.7540  | 10 -40.7617 |
| 11 -40.7555 | 12 -40.7575 | 13 -40.6533 | 14 -40.6983 | 15 -40.7728 |
| 16 -40.7005 | 17 -40.6941 | 18 -40.8611 | 19 -40.6813 | 20 -40.6701 |
| 21 -40.6907 | 22 -40.6634 | 23 -40.0834 | 24 -40.1276 | 25 -57.4610 |
| 26 -57.6723 | 27 -57.6590 | 28 -57.4711 | 29 -57.6662 | 30 -57.4610 |
| 31 -57.6721 | 32 -57.6586 | 33 -57.4690 | 34 -57.6711 | 35 -57.4618 |
| 36 -57.6740 | 37 -57.6586 | 38 -57.4712 | 39 -57.6770 | 40 -57.4609 |
| 41 -57.6780 | 42 -57.6588 | 43 -57.4761 | 44 -57.6914 | 45 -57.4609 |
| 46 -57.6769 | 47 -57.6596 | 48 -57.4763 | 49 -57.6827 | 50 -57.4620 |
| 51 -57.6737 | 52 -57.6594 | 53 -57.4740 | 54 -57.6690 | 55 -57.6389 |
| 56 -57.6651 | 57 -57.6897 | 58 -57.6864 | 59 -57.6688 | 60 -57.6715 |

|              |              |              |              |              |
|--------------|--------------|--------------|--------------|--------------|
| 61 -57.6931  | 62 -57.6779  | 63 -57.6392  | 64 -57.6645  | 65 -57.6918  |
| 66 -57.6978  | 67 -57.6670  | 68 -57.6713  | 69 -57.6969  | 70 -57.7044  |
| 71 -57.6387  | 72 -57.6659  | 73 -57.6995  | 74 -57.7248  | 75 -57.6679  |
| 76 -57.6719  | 77 -57.7090  | 78 -57.7551  | 79 -57.6388  | 80 -57.6685  |
| 81 -57.7132  | 82 -57.7551  | 83 -57.6711  | 84 -57.6734  | 85 -57.7405  |
| 86 -57.8448  | 87 -57.6413  | 88 -57.6692  | 89 -57.7151  | 90 -57.7201  |
| 91 -57.6759  | 92 -57.6736  | 93 -57.7451  | 94 -57.7634  | 95 -57.6396  |
| 96 -57.6674  | 97 -57.6988  | 98 -57.6937  | 99 -57.6731  | 100 -57.6724 |
| 101 -57.7109 | 102 -57.6892 | 103 -57.6626 | 104 -57.6334 | 105 -57.6489 |
| 106 -57.2940 | 107 -57.3906 | 108 -57.6336 | 109 -57.6012 | 110 -57.6615 |
| 111 -57.6333 | 112 -57.6455 | 113 -57.3134 | 114 -57.3963 | 115 -57.6328 |
| 116 -57.6031 | 117 -57.6608 | 118 -57.6250 | 119 -57.7015 | 120 -57.6884 |
| 121 -57.3899 | 122 -57.6316 | 123 -57.7129 | 124 -57.6617 | 125 -57.6277 |
| 126 -57.8377 | 127 -58.3414 | 128 -57.3631 | 129 -57.6369 | 130 -58.1486 |
| 131 -57.6697 | 132 -57.6370 | 133 -57.8049 | 134 -57.4215 | 135 -57.3745 |
| 136 -57.6408 | 137 -58.0829 | 138 -57.6661 | 139 -57.6328 | 140 -57.6747 |
| 141 -57.3035 | 142 -57.3806 | 143 -57.6362 | 144 -57.6512 | 145 -60.8251 |
| 146 -57.3138 | 147 -81.2072 |              |              |              |

E-fermi : -2.2972

XC(G=0): -2.7342

alpha+bet : -2.2521

spin component 1

k-point 1 : 0.0000 0.0000 0.0000

| band No. | band energies | occupation |
|----------|---------------|------------|
| 1        | -26.8307      | 1.00000    |
| 2        | -21.5716      | 1.00000    |
| 3        | -21.4741      | 1.00000    |
| 4        | -21.1030      | 1.00000    |
| 5        | -21.0716      | 1.00000    |
| 6        | -21.0176      | 1.00000    |
| 7        | -20.9813      | 1.00000    |
| 8        | -20.9794      | 1.00000    |
| 9        | -20.8936      | 1.00000    |
| 10       | -20.5610      | 1.00000    |
| 11       | -20.5063      | 1.00000    |
| 12       | -20.4141      | 1.00000    |
| 13       | -20.4007      | 1.00000    |
| 14       | -20.1295      | 1.00000    |
| 15       | -19.9783      | 1.00000    |
| 16       | -19.7065      | 1.00000    |

|    |          |         |
|----|----------|---------|
| 17 | -19.6306 | 1.00000 |
| 18 | -19.6025 | 1.00000 |
| 19 | -19.5869 | 1.00000 |
| 20 | -19.5312 | 1.00000 |
| 21 | -19.5295 | 1.00000 |
| 22 | -19.5011 | 1.00000 |
| 23 | -19.4837 | 1.00000 |
| 24 | -19.1150 | 1.00000 |
| 25 | -19.0785 | 1.00000 |
| 26 | -18.9810 | 1.00000 |
| 27 | -18.9674 | 1.00000 |
| 28 | -18.9036 | 1.00000 |
| 29 | -18.7360 | 1.00000 |
| 30 | -18.5077 | 1.00000 |
| 31 | -18.3621 | 1.00000 |
| 32 | -18.2778 | 1.00000 |
| 33 | -18.2547 | 1.00000 |
| 34 | -18.1866 | 1.00000 |
| 35 | -18.1845 | 1.00000 |
| 36 | -18.0824 | 1.00000 |
| 37 | -18.0786 | 1.00000 |
| 38 | -17.5646 | 1.00000 |

|    |          |         |
|----|----------|---------|
| 39 | -17.3159 | 1.00000 |
| 40 | -17.2908 | 1.00000 |
| 41 | -17.2856 | 1.00000 |
| 42 | -17.2125 | 1.00000 |
| 43 | -17.2061 | 1.00000 |
| 44 | -17.1798 | 1.00000 |
| 45 | -17.0258 | 1.00000 |
| 46 | -16.9532 | 1.00000 |
| 47 | -16.9355 | 1.00000 |
| 48 | -16.8958 | 1.00000 |
| 49 | -16.8940 | 1.00000 |
| 50 | -16.8527 | 1.00000 |
| 51 | -16.8444 | 1.00000 |
| 52 | -16.8244 | 1.00000 |
| 53 | -16.8218 | 1.00000 |
| 54 | -16.7319 | 1.00000 |
| 55 | -16.7288 | 1.00000 |
| 56 | -16.1806 | 1.00000 |
| 57 | -15.7322 | 1.00000 |
| 58 | -15.6947 | 1.00000 |
| 59 | -15.6632 | 1.00000 |
| 60 | -15.6403 | 1.00000 |

|    |          |         |
|----|----------|---------|
| 61 | -15.6187 | 1.00000 |
| 62 | -15.5563 | 1.00000 |
| 63 | -15.5523 | 1.00000 |
| 64 | -15.1785 | 1.00000 |
| 65 | -14.8121 | 1.00000 |
| 66 | -14.6116 | 1.00000 |
| 67 | -14.5805 | 1.00000 |
| 68 | -14.5374 | 1.00000 |
| 69 | -14.5009 | 1.00000 |
| 70 | -14.4713 | 1.00000 |
| 71 | -14.4455 | 1.00000 |
| 72 | -14.3369 | 1.00000 |
| 73 | -14.3083 | 1.00000 |
| 74 | -14.2823 | 1.00000 |
| 75 | -14.2749 | 1.00000 |
| 76 | -14.1849 | 1.00000 |
| 77 | -14.1811 | 1.00000 |
| 78 | -13.8923 | 1.00000 |
| 79 | -13.7631 | 1.00000 |
| 80 | -13.5966 | 1.00000 |
| 81 | -13.5511 | 1.00000 |
| 82 | -13.5320 | 1.00000 |

|     |          |         |
|-----|----------|---------|
| 83  | -13.5010 | 1.00000 |
| 84  | -13.4487 | 1.00000 |
| 85  | -13.3666 | 1.00000 |
| 86  | -13.3480 | 1.00000 |
| 87  | -13.1924 | 1.00000 |
| 88  | -12.7892 | 1.00000 |
| 89  | -12.7621 | 1.00000 |
| 90  | -12.7301 | 1.00000 |
| 91  | -12.6986 | 1.00000 |
| 92  | -12.6889 | 1.00000 |
| 93  | -12.6270 | 1.00000 |
| 94  | -12.4636 | 1.00000 |
| 95  | -12.4487 | 1.00000 |
| 96  | -12.3848 | 1.00000 |
| 97  | -12.3262 | 1.00000 |
| 98  | -12.2155 | 1.00000 |
| 99  | -12.2058 | 1.00000 |
| 100 | -12.1677 | 1.00000 |
| 101 | -11.9489 | 1.00000 |
| 102 | -11.6866 | 1.00000 |
| 103 | -11.6290 | 1.00000 |
| 104 | -11.6134 | 1.00000 |

|     |          |         |
|-----|----------|---------|
| 105 | -11.5745 | 1.00000 |
| 106 | -11.0931 | 1.00000 |
| 107 | -11.0561 | 1.00000 |
| 108 | -10.9003 | 1.00000 |
| 109 | -10.8897 | 1.00000 |
| 110 | -10.8329 | 1.00000 |
| 111 | -10.7132 | 1.00000 |
| 112 | -10.6790 | 1.00000 |
| 113 | -10.6633 | 1.00000 |
| 114 | -10.6493 | 1.00000 |
| 115 | -10.5918 | 1.00000 |
| 116 | -10.5833 | 1.00000 |
| 117 | -10.5747 | 1.00000 |
| 118 | -10.5708 | 1.00000 |
| 119 | -10.5286 | 1.00000 |
| 120 | -10.5278 | 1.00000 |
| 121 | -10.5130 | 1.00000 |
| 122 | -10.5052 | 1.00000 |
| 123 | -10.3813 | 1.00000 |
| 124 | -10.2932 | 1.00000 |
| 125 | -10.2583 | 1.00000 |
| 126 | -10.1899 | 1.00000 |

|     |          |         |
|-----|----------|---------|
| 127 | -10.1888 | 1.00000 |
| 128 | -10.0370 | 1.00000 |
| 129 | -9.9912  | 1.00000 |
| 130 | -9.8895  | 1.00000 |
| 131 | -9.8623  | 1.00000 |
| 132 | -9.7945  | 1.00000 |
| 133 | -9.7885  | 1.00000 |
| 134 | -9.7477  | 1.00000 |
| 135 | -9.6809  | 1.00000 |
| 136 | -9.4482  | 1.00000 |
| 137 | -9.4264  | 1.00000 |
| 138 | -9.3971  | 1.00000 |
| 139 | -9.3902  | 1.00000 |
| 140 | -9.3808  | 1.00000 |
| 141 | -9.3713  | 1.00000 |
| 142 | -9.3127  | 1.00000 |
| 143 | -9.3055  | 1.00000 |
| 144 | -9.2950  | 1.00000 |
| 145 | -9.2845  | 1.00000 |
| 146 | -9.2705  | 1.00000 |
| 147 | -9.0933  | 1.00000 |
| 148 | -9.0059  | 1.00000 |

|     |         |         |
|-----|---------|---------|
| 149 | -8.9805 | 1.00000 |
| 150 | -8.9595 | 1.00000 |
| 151 | -8.9509 | 1.00000 |
| 152 | -8.7949 | 1.00000 |
| 153 | -8.7480 | 1.00000 |
| 154 | -8.7370 | 1.00000 |
| 155 | -8.7203 | 1.00000 |
| 156 | -8.7109 | 1.00000 |
| 157 | -8.6896 | 1.00000 |
| 158 | -8.6796 | 1.00000 |
| 159 | -8.6712 | 1.00000 |
| 160 | -8.6558 | 1.00000 |
| 161 | -8.5964 | 1.00000 |
| 162 | -8.5852 | 1.00000 |
| 163 | -8.5784 | 1.00000 |
| 164 | -8.5699 | 1.00000 |
| 165 | -8.4907 | 1.00000 |
| 166 | -8.4596 | 1.00000 |
| 167 | -8.4383 | 1.00000 |
| 168 | -8.3481 | 1.00000 |
| 169 | -8.2999 | 1.00000 |
| 170 | -8.2765 | 1.00000 |

|     |         |         |
|-----|---------|---------|
| 171 | -8.2660 | 1.00000 |
| 172 | -8.2355 | 1.00000 |
| 173 | -8.2344 | 1.00000 |
| 174 | -8.1538 | 1.00000 |
| 175 | -8.1473 | 1.00000 |
| 176 | -8.0791 | 1.00000 |
| 177 | -8.0466 | 1.00000 |
| 178 | -8.0285 | 1.00000 |
| 179 | -8.0237 | 1.00000 |
| 180 | -7.9754 | 1.00000 |
| 181 | -7.9670 | 1.00000 |
| 182 | -7.9267 | 1.00000 |
| 183 | -7.9029 | 1.00000 |
| 184 | -7.8872 | 1.00000 |
| 185 | -7.8747 | 1.00000 |
| 186 | -7.8028 | 1.00000 |
| 187 | -7.7995 | 1.00000 |
| 188 | -7.7496 | 1.00000 |
| 189 | -7.7127 | 1.00000 |
| 190 | -7.6685 | 1.00000 |
| 191 | -7.6024 | 1.00000 |
| 192 | -7.5872 | 1.00000 |

|     |         |         |
|-----|---------|---------|
| 193 | -7.5780 | 1.00000 |
| 194 | -7.5499 | 1.00000 |
| 195 | -7.4828 | 1.00000 |
| 196 | -7.4823 | 1.00000 |
| 197 | -7.4310 | 1.00000 |
| 198 | -7.3271 | 1.00000 |
| 199 | -7.2516 | 1.00000 |
| 200 | -7.1562 | 1.00000 |
| 201 | -7.0683 | 1.00000 |
| 202 | -7.0439 | 1.00000 |
| 203 | -7.0307 | 1.00000 |
| 204 | -7.0158 | 1.00000 |
| 205 | -6.9990 | 1.00000 |
| 206 | -6.9922 | 1.00000 |
| 207 | -6.9778 | 1.00000 |
| 208 | -6.8687 | 1.00000 |
| 209 | -6.8229 | 1.00000 |
| 210 | -6.8037 | 1.00000 |
| 211 | -6.7954 | 1.00000 |
| 212 | -6.7343 | 1.00000 |
| 213 | -6.6886 | 1.00000 |
| 214 | -6.4737 | 1.00000 |

|     |         |         |
|-----|---------|---------|
| 215 | -6.4274 | 1.00000 |
| 216 | -6.3983 | 1.00000 |
| 217 | -6.3934 | 1.00000 |
| 218 | -6.3765 | 1.00000 |
| 219 | -6.3750 | 1.00000 |
| 220 | -6.3198 | 1.00000 |
| 221 | -6.3098 | 1.00000 |
| 222 | -6.2393 | 1.00000 |
| 223 | -6.2319 | 1.00000 |
| 224 | -6.2314 | 1.00000 |
| 225 | -6.0801 | 1.00000 |
| 226 | -6.0401 | 1.00000 |
| 227 | -5.7949 | 1.00000 |
| 228 | -5.7546 | 1.00000 |
| 229 | -5.6968 | 1.00000 |
| 230 | -5.6434 | 1.00000 |
| 231 | -5.6397 | 1.00000 |
| 232 | -5.5616 | 1.00000 |
| 233 | -5.5326 | 1.00000 |
| 234 | -5.4702 | 1.00000 |
| 235 | -5.4418 | 1.00000 |
| 236 | -5.1672 | 1.00000 |

|     |         |         |
|-----|---------|---------|
| 237 | -5.0611 | 1.00000 |
| 238 | -5.0530 | 1.00000 |
| 239 | -5.0208 | 1.00000 |
| 240 | -4.9916 | 1.00000 |
| 241 | -4.9130 | 1.00000 |
| 242 | -4.8561 | 1.00000 |
| 243 | -4.8251 | 1.00000 |
| 244 | -4.7926 | 1.00000 |
| 245 | -4.6826 | 1.00000 |
| 246 | -4.5751 | 1.00000 |
| 247 | -4.5738 | 1.00000 |
| 248 | -4.5084 | 1.00000 |
| 249 | -4.4480 | 1.00000 |
| 250 | -4.3864 | 1.00000 |
| 251 | -4.2951 | 1.00000 |
| 252 | -4.2686 | 1.00000 |
| 253 | -4.2152 | 1.00000 |
| 254 | -3.5643 | 1.00000 |
| 255 | -3.3571 | 1.00000 |
| 256 | -3.2047 | 1.00000 |
| 257 | -2.9414 | 1.00000 |
| 258 | -2.8509 | 1.00000 |

|     |         |         |
|-----|---------|---------|
| 259 | -2.8262 | 1.00000 |
| 260 | -2.6102 | 1.00000 |
| 261 | -1.9107 | 0.00000 |
| 262 | -1.7709 | 0.00000 |
| 263 | -1.7219 | 0.00000 |
| 264 | -1.3502 | 0.00000 |
| 265 | -1.3289 | 0.00000 |
| 266 | -1.2022 | 0.00000 |
| 267 | -0.7507 | 0.00000 |
| 268 | -0.5871 | 0.00000 |
| 269 | -0.5060 | 0.00000 |
| 270 | -0.3104 | 0.00000 |
| 271 | -0.3083 | 0.00000 |
| 272 | -0.2926 | 0.00000 |
| 273 | -0.1859 | 0.00000 |
| 274 | -0.0610 | 0.00000 |
| 275 | -0.0529 | 0.00000 |
| 276 | -0.0129 | 0.00000 |
| 277 | 0.0326  | 0.00000 |
| 278 | 0.0810  | 0.00000 |
| 279 | 0.1706  | 0.00000 |
| 280 | 0.2181  | 0.00000 |

|     |        |         |
|-----|--------|---------|
| 281 | 0.2455 | 0.00000 |
| 282 | 0.4179 | 0.00000 |
| 283 | 0.4447 | 0.00000 |
| 284 | 0.4793 | 0.00000 |
| 285 | 0.5970 | 0.00000 |
| 286 | 0.6668 | 0.00000 |
| 287 | 0.8182 | 0.00000 |
| 288 | 0.8714 | 0.00000 |
| 289 | 1.0465 | 0.00000 |
| 290 | 1.0856 | 0.00000 |
| 291 | 1.1165 | 0.00000 |
| 292 | 1.1606 | 0.00000 |
| 293 | 1.2224 | 0.00000 |
| 294 | 1.2432 | 0.00000 |
| 295 | 1.2861 | 0.00000 |
| 296 | 1.3136 | 0.00000 |
| 297 | 1.3453 | 0.00000 |
| 298 | 1.4096 | 0.00000 |
| 299 | 1.4638 | 0.00000 |
| 300 | 1.4828 | 0.00000 |
| 301 | 1.5511 | 0.00000 |
| 302 | 1.5855 | 0.00000 |

|     |        |         |
|-----|--------|---------|
| 303 | 1.6202 | 0.00000 |
| 304 | 1.6766 | 0.00000 |
| 305 | 1.7496 | 0.00000 |
| 306 | 1.7619 | 0.00000 |
| 307 | 1.8712 | 0.00000 |
| 308 | 1.8914 | 0.00000 |
| 309 | 1.9029 | 0.00000 |
| 310 | 1.9113 | 0.00000 |
| 311 | 2.1243 | 0.00000 |
| 312 | 2.1881 | 0.00000 |
| 313 | 2.2071 | 0.00000 |
| 314 | 2.2322 | 0.00000 |
| 315 | 2.2739 | 0.00000 |
| 316 | 2.2914 | 0.00000 |
| 317 | 2.3310 | 0.00000 |
| 318 | 2.3520 | 0.00000 |
| 319 | 2.3706 | 0.00000 |
| 320 | 2.3962 | 0.00000 |
| 321 | 2.4146 | 0.00000 |
| 322 | 2.4292 | 0.00000 |
| 323 | 2.4366 | 0.00000 |
| 324 | 2.4529 | 0.00000 |

|     |        |         |
|-----|--------|---------|
| 325 | 2.4613 | 0.00000 |
| 326 | 2.5260 | 0.00000 |
| 327 | 2.5402 | 0.00000 |
| 328 | 2.7007 | 0.00000 |
| 329 | 2.7285 | 0.00000 |
| 330 | 2.7520 | 0.00000 |
| 331 | 2.7556 | 0.00000 |
| 332 | 2.7647 | 0.00000 |
| 333 | 2.8107 | 0.00000 |
| 334 | 2.8320 | 0.00000 |
| 335 | 2.8601 | 0.00000 |
| 336 | 2.8907 | 0.00000 |
| 337 | 2.9229 | 0.00000 |
| 338 | 2.9451 | 0.00000 |
| 339 | 2.9778 | 0.00000 |
| 340 | 3.0044 | 0.00000 |
| 341 | 3.0333 | 0.00000 |
| 342 | 3.0420 | 0.00000 |
| 343 | 3.0657 | 0.00000 |
| 344 | 3.0840 | 0.00000 |
| 345 | 3.1505 | 0.00000 |
| 346 | 3.1616 | 0.00000 |

|     |        |         |
|-----|--------|---------|
| 347 | 3.1790 | 0.00000 |
| 348 | 3.1918 | 0.00000 |
| 349 | 3.3017 | 0.00000 |
| 350 | 3.3236 | 0.00000 |
| 351 | 3.3529 | 0.00000 |
| 352 | 3.3681 | 0.00000 |
| 353 | 3.3895 | 0.00000 |
| 354 | 3.4343 | 0.00000 |
| 355 | 3.4764 | 0.00000 |
| 356 | 3.4820 | 0.00000 |
| 357 | 3.4853 | 0.00000 |
| 358 | 3.4966 | 0.00000 |
| 359 | 3.6348 | 0.00000 |
| 360 | 3.6728 | 0.00000 |
| 361 | 3.6874 | 0.00000 |
| 362 | 3.7326 | 0.00000 |
| 363 | 3.7493 | 0.00000 |
| 364 | 3.7576 | 0.00000 |
| 365 | 3.7718 | 0.00000 |
| 366 | 3.7925 | 0.00000 |
| 367 | 3.8106 | 0.00000 |
| 368 | 3.8323 | 0.00000 |

|     |        |         |
|-----|--------|---------|
| 369 | 3.8368 | 0.00000 |
| 370 | 3.8507 | 0.00000 |
| 371 | 3.8756 | 0.00000 |
| 372 | 3.8827 | 0.00000 |
| 373 | 3.9093 | 0.00000 |
| 374 | 3.9228 | 0.00000 |
| 375 | 3.9324 | 0.00000 |
| 376 | 3.9570 | 0.00000 |
| 377 | 3.9721 | 0.00000 |
| 378 | 3.9846 | 0.00000 |
| 379 | 4.0156 | 0.00000 |
| 380 | 4.0680 | 0.00000 |
| 381 | 4.1646 | 0.00000 |
| 382 | 4.2465 | 0.00000 |
| 383 | 4.2578 | 0.00000 |
| 384 | 4.2587 | 0.00000 |
| 385 | 4.2855 | 0.00000 |
| 386 | 4.3137 | 0.00000 |
| 387 | 4.3281 | 0.00000 |
| 388 | 4.3413 | 0.00000 |
| 389 | 4.3705 | 0.00000 |
| 390 | 4.3802 | 0.00000 |

|     |        |         |
|-----|--------|---------|
| 391 | 4.4173 | 0.00000 |
| 392 | 4.4447 | 0.00000 |
| 393 | 4.4693 | 0.00000 |
| 394 | 4.4805 | 0.00000 |
| 395 | 4.4857 | 0.00000 |
| 396 | 4.4965 | 0.00000 |
| 397 | 4.5180 | 0.00000 |
| 398 | 4.5500 | 0.00000 |
| 399 | 4.5894 | 0.00000 |
| 400 | 4.6080 | 0.00000 |
| 401 | 4.6264 | 0.00000 |
| 402 | 4.6423 | 0.00000 |
| 403 | 4.6564 | 0.00000 |
| 404 | 4.6790 | 0.00000 |
| 405 | 4.7034 | 0.00000 |
| 406 | 4.7311 | 0.00000 |
| 407 | 4.7460 | 0.00000 |
| 408 | 4.7672 | 0.00000 |
| 409 | 4.7823 | 0.00000 |
| 410 | 4.7830 | 0.00000 |
| 411 | 4.7965 | 0.00000 |
| 412 | 4.8284 | 0.00000 |

|     |        |         |
|-----|--------|---------|
| 413 | 4.8620 | 0.00000 |
| 414 | 4.8708 | 0.00000 |
| 415 | 4.8974 | 0.00000 |
| 416 | 4.9314 | 0.00000 |
| 417 | 4.9832 | 0.00000 |
| 418 | 5.0039 | 0.00000 |
| 419 | 5.0104 | 0.00000 |
| 420 | 5.0347 | 0.00000 |
| 421 | 5.0387 | 0.00000 |
| 422 | 5.0634 | 0.00000 |
| 423 | 5.0815 | 0.00000 |
| 424 | 5.1147 | 0.00000 |
| 425 | 5.1171 | 0.00000 |
| 426 | 5.1369 | 0.00000 |
| 427 | 5.1407 | 0.00000 |
| 428 | 5.1523 | 0.00000 |
| 429 | 5.1747 | 0.00000 |
| 430 | 5.1847 | 0.00000 |
| 431 | 5.1881 | 0.00000 |
| 432 | 5.2172 | 0.00000 |
| 433 | 5.2344 | 0.00000 |
| 434 | 5.2418 | 0.00000 |

|     |        |         |
|-----|--------|---------|
| 435 | 5.2559 | 0.00000 |
| 436 | 5.2883 | 0.00000 |
| 437 | 5.2944 | 0.00000 |
| 438 | 5.3081 | 0.00000 |
| 439 | 5.3316 | 0.00000 |
| 440 | 5.3486 | 0.00000 |
| 441 | 5.3664 | 0.00000 |
| 442 | 5.3724 | 0.00000 |
| 443 | 5.3911 | 0.00000 |
| 444 | 5.4204 | 0.00000 |
| 445 | 5.4528 | 0.00000 |
| 446 | 5.4620 | 0.00000 |
| 447 | 5.4811 | 0.00000 |
| 448 | 5.4946 | 0.00000 |
| 449 | 5.5168 | 0.00000 |
| 450 | 5.5483 | 0.00000 |
| 451 | 5.5666 | 0.00000 |
| 452 | 5.5743 | 0.00000 |
| 453 | 5.5955 | 0.00000 |
| 454 | 5.6136 | 0.00000 |
| 455 | 5.6568 | 0.00000 |
| 456 | 5.6801 | 0.00000 |

|     |        |         |
|-----|--------|---------|
| 457 | 5.7089 | 0.00000 |
| 458 | 5.7226 | 0.00000 |
| 459 | 5.7440 | 0.00000 |
| 460 | 5.7576 | 0.00000 |
| 461 | 5.7810 | 0.00000 |
| 462 | 5.7884 | 0.00000 |
| 463 | 5.7941 | 0.00000 |
| 464 | 5.7997 | 0.00000 |
| 465 | 5.8071 | 0.00000 |
| 466 | 5.8230 | 0.00000 |
| 467 | 5.8418 | 0.00000 |
| 468 | 5.8540 | 0.00000 |
| 469 | 5.8716 | 0.00000 |
| 470 | 5.8793 | 0.00000 |
| 471 | 5.8846 | 0.00000 |
| 472 | 5.9071 | 0.00000 |
| 473 | 5.9129 | 0.00000 |
| 474 | 5.9384 | 0.00000 |
| 475 | 5.9473 | 0.00000 |
| 476 | 5.9670 | 0.00000 |
| 477 | 5.9720 | 0.00000 |
| 478 | 5.9894 | 0.00000 |

|     |        |         |
|-----|--------|---------|
| 479 | 6.0039 | 0.00000 |
| 480 | 6.0504 | 0.00000 |

spin component 2

k-point 1 : 0.0000 0.0000 0.0000

| band No. | band energies | occupation |
|----------|---------------|------------|
| 1        | -26.8239      | 1.00000    |
| 2        | -21.5704      | 1.00000    |
| 3        | -21.4725      | 1.00000    |
| 4        | -21.1011      | 1.00000    |
| 5        | -21.0707      | 1.00000    |
| 6        | -21.0149      | 1.00000    |
| 7        | -20.9799      | 1.00000    |
| 8        | -20.9775      | 1.00000    |
| 9        | -20.8831      | 1.00000    |
| 10       | -20.5581      | 1.00000    |
| 11       | -20.5030      | 1.00000    |
| 12       | -20.4031      | 1.00000    |
| 13       | -20.3910      | 1.00000    |
| 14       | -20.1254      | 1.00000    |
| 15       | -19.9552      | 1.00000    |

|    |          |         |
|----|----------|---------|
| 16 | -19.7038 | 1.00000 |
| 17 | -19.6294 | 1.00000 |
| 18 | -19.6004 | 1.00000 |
| 19 | -19.5805 | 1.00000 |
| 20 | -19.5299 | 1.00000 |
| 21 | -19.5277 | 1.00000 |
| 22 | -19.4785 | 1.00000 |
| 23 | -19.4642 | 1.00000 |
| 24 | -19.1126 | 1.00000 |
| 25 | -19.0761 | 1.00000 |
| 26 | -18.9711 | 1.00000 |
| 27 | -18.9579 | 1.00000 |
| 28 | -18.8988 | 1.00000 |
| 29 | -18.7064 | 1.00000 |
| 30 | -18.5047 | 1.00000 |
| 31 | -18.3551 | 1.00000 |
| 32 | -18.2497 | 1.00000 |
| 33 | -18.2296 | 1.00000 |
| 34 | -18.1814 | 1.00000 |
| 35 | -18.1791 | 1.00000 |
| 36 | -18.0622 | 1.00000 |
| 37 | -18.0590 | 1.00000 |

|    |          |         |
|----|----------|---------|
| 38 | -17.5613 | 1.00000 |
| 39 | -17.2999 | 1.00000 |
| 40 | -17.2902 | 1.00000 |
| 41 | -17.2761 | 1.00000 |
| 42 | -17.2102 | 1.00000 |
| 43 | -17.2091 | 1.00000 |
| 44 | -17.1768 | 1.00000 |
| 45 | -17.0219 | 1.00000 |
| 46 | -16.9444 | 1.00000 |
| 47 | -16.9252 | 1.00000 |
| 48 | -16.8732 | 1.00000 |
| 49 | -16.8721 | 1.00000 |
| 50 | -16.8319 | 1.00000 |
| 51 | -16.8257 | 1.00000 |
| 52 | -16.8208 | 1.00000 |
| 53 | -16.8182 | 1.00000 |
| 54 | -16.7337 | 1.00000 |
| 55 | -16.7276 | 1.00000 |
| 56 | -16.1780 | 1.00000 |
| 57 | -15.7315 | 1.00000 |
| 58 | -15.6605 | 1.00000 |
| 59 | -15.6467 | 1.00000 |

|    |          |         |
|----|----------|---------|
| 60 | -15.6235 | 1.00000 |
| 61 | -15.5691 | 1.00000 |
| 62 | -15.5303 | 1.00000 |
| 63 | -15.5276 | 1.00000 |
| 64 | -15.1748 | 1.00000 |
| 65 | -14.8099 | 1.00000 |
| 66 | -14.6094 | 1.00000 |
| 67 | -14.5630 | 1.00000 |
| 68 | -14.5029 | 1.00000 |
| 69 | -14.5011 | 1.00000 |
| 70 | -14.4673 | 1.00000 |
| 71 | -14.4411 | 1.00000 |
| 72 | -14.3335 | 1.00000 |
| 73 | -14.3008 | 1.00000 |
| 74 | -14.2706 | 1.00000 |
| 75 | -14.2665 | 1.00000 |
| 76 | -14.1668 | 1.00000 |
| 77 | -14.1635 | 1.00000 |
| 78 | -13.8915 | 1.00000 |
| 79 | -13.7607 | 1.00000 |
| 80 | -13.5940 | 1.00000 |
| 81 | -13.5406 | 1.00000 |

|     |          |         |
|-----|----------|---------|
| 82  | -13.5209 | 1.00000 |
| 83  | -13.4973 | 1.00000 |
| 84  | -13.4470 | 1.00000 |
| 85  | -13.3461 | 1.00000 |
| 86  | -13.3434 | 1.00000 |
| 87  | -13.1908 | 1.00000 |
| 88  | -12.7830 | 1.00000 |
| 89  | -12.7526 | 1.00000 |
| 90  | -12.7212 | 1.00000 |
| 91  | -12.6800 | 1.00000 |
| 92  | -12.6731 | 1.00000 |
| 93  | -12.6248 | 1.00000 |
| 94  | -12.4511 | 1.00000 |
| 95  | -12.4339 | 1.00000 |
| 96  | -12.3812 | 1.00000 |
| 97  | -12.3254 | 1.00000 |
| 98  | -12.2109 | 1.00000 |
| 99  | -12.2006 | 1.00000 |
| 100 | -12.1662 | 1.00000 |
| 101 | -11.9462 | 1.00000 |
| 102 | -11.6836 | 1.00000 |
| 103 | -11.6116 | 1.00000 |

|     |          |         |
|-----|----------|---------|
| 104 | -11.5943 | 1.00000 |
| 105 | -11.5683 | 1.00000 |
| 106 | -11.0912 | 1.00000 |
| 107 | -11.0530 | 1.00000 |
| 108 | -10.8911 | 1.00000 |
| 109 | -10.8792 | 1.00000 |
| 110 | -10.8301 | 1.00000 |
| 111 | -10.7073 | 1.00000 |
| 112 | -10.6778 | 1.00000 |
| 113 | -10.6604 | 1.00000 |
| 114 | -10.6443 | 1.00000 |
| 115 | -10.5838 | 1.00000 |
| 116 | -10.5765 | 1.00000 |
| 117 | -10.5717 | 1.00000 |
| 118 | -10.5678 | 1.00000 |
| 119 | -10.5180 | 1.00000 |
| 120 | -10.5172 | 1.00000 |
| 121 | -10.5039 | 1.00000 |
| 122 | -10.4992 | 1.00000 |
| 123 | -10.3805 | 1.00000 |
| 124 | -10.2923 | 1.00000 |
| 125 | -10.2575 | 1.00000 |

|     |          |         |
|-----|----------|---------|
| 126 | -10.1865 | 1.00000 |
| 127 | -10.1854 | 1.00000 |
| 128 | -10.0321 | 1.00000 |
| 129 | -9.9807  | 1.00000 |
| 130 | -9.8867  | 1.00000 |
| 131 | -9.8588  | 1.00000 |
| 132 | -9.7859  | 1.00000 |
| 133 | -9.7794  | 1.00000 |
| 134 | -9.7457  | 1.00000 |
| 135 | -9.6777  | 1.00000 |
| 136 | -9.4464  | 1.00000 |
| 137 | -9.4230  | 1.00000 |
| 138 | -9.3864  | 1.00000 |
| 139 | -9.3812  | 1.00000 |
| 140 | -9.3727  | 1.00000 |
| 141 | -9.3618  | 1.00000 |
| 142 | -9.3104  | 1.00000 |
| 143 | -9.3031  | 1.00000 |
| 144 | -9.2942  | 1.00000 |
| 145 | -9.2821  | 1.00000 |
| 146 | -9.2492  | 1.00000 |
| 147 | -9.0920  | 1.00000 |

|     |         |         |
|-----|---------|---------|
| 148 | -9.0023 | 1.00000 |
| 149 | -8.9715 | 1.00000 |
| 150 | -8.9453 | 1.00000 |
| 151 | -8.9416 | 1.00000 |
| 152 | -8.7924 | 1.00000 |
| 153 | -8.7401 | 1.00000 |
| 154 | -8.7346 | 1.00000 |
| 155 | -8.7147 | 1.00000 |
| 156 | -8.7075 | 1.00000 |
| 157 | -8.6725 | 1.00000 |
| 158 | -8.6662 | 1.00000 |
| 159 | -8.6583 | 1.00000 |
| 160 | -8.6551 | 1.00000 |
| 161 | -8.5790 | 1.00000 |
| 162 | -8.5732 | 1.00000 |
| 163 | -8.5684 | 1.00000 |
| 164 | -8.5514 | 1.00000 |
| 165 | -8.4903 | 1.00000 |
| 166 | -8.4590 | 1.00000 |
| 167 | -8.4367 | 1.00000 |
| 168 | -8.3454 | 1.00000 |
| 169 | -8.2969 | 1.00000 |

|     |         |         |
|-----|---------|---------|
| 170 | -8.2749 | 1.00000 |
| 171 | -8.2354 | 1.00000 |
| 172 | -8.2318 | 1.00000 |
| 173 | -8.2297 | 1.00000 |
| 174 | -8.1436 | 1.00000 |
| 175 | -8.1361 | 1.00000 |
| 176 | -8.0759 | 1.00000 |
| 177 | -8.0445 | 1.00000 |
| 178 | -8.0158 | 1.00000 |
| 179 | -8.0088 | 1.00000 |
| 180 | -7.9709 | 1.00000 |
| 181 | -7.9619 | 1.00000 |
| 182 | -7.9226 | 1.00000 |
| 183 | -7.8933 | 1.00000 |
| 184 | -7.8734 | 1.00000 |
| 185 | -7.8659 | 1.00000 |
| 186 | -7.7940 | 1.00000 |
| 187 | -7.7902 | 1.00000 |
| 188 | -7.7401 | 1.00000 |
| 189 | -7.6813 | 1.00000 |
| 190 | -7.6383 | 1.00000 |
| 191 | -7.6001 | 1.00000 |

|     |         |         |
|-----|---------|---------|
| 192 | -7.5794 | 1.00000 |
| 193 | -7.5571 | 1.00000 |
| 194 | -7.5422 | 1.00000 |
| 195 | -7.4748 | 1.00000 |
| 196 | -7.4746 | 1.00000 |
| 197 | -7.4299 | 1.00000 |
| 198 | -7.3262 | 1.00000 |
| 199 | -7.2383 | 1.00000 |
| 200 | -7.1529 | 1.00000 |
| 201 | -7.0582 | 1.00000 |
| 202 | -7.0385 | 1.00000 |
| 203 | -7.0178 | 1.00000 |
| 204 | -6.9876 | 1.00000 |
| 205 | -6.9799 | 1.00000 |
| 206 | -6.9748 | 1.00000 |
| 207 | -6.9434 | 1.00000 |
| 208 | -6.8650 | 1.00000 |
| 209 | -6.8186 | 1.00000 |
| 210 | -6.7976 | 1.00000 |
| 211 | -6.7902 | 1.00000 |
| 212 | -6.7275 | 1.00000 |
| 213 | -6.6792 | 1.00000 |

|     |         |         |
|-----|---------|---------|
| 214 | -6.4705 | 1.00000 |
| 215 | -6.3975 | 1.00000 |
| 216 | -6.3852 | 1.00000 |
| 217 | -6.3806 | 1.00000 |
| 218 | -6.3657 | 1.00000 |
| 219 | -6.3410 | 1.00000 |
| 220 | -6.3061 | 1.00000 |
| 221 | -6.2782 | 1.00000 |
| 222 | -6.2317 | 1.00000 |
| 223 | -6.2303 | 1.00000 |
| 224 | -6.2250 | 1.00000 |
| 225 | -6.0494 | 1.00000 |
| 226 | -6.0115 | 1.00000 |
| 227 | -5.7586 | 1.00000 |
| 228 | -5.7139 | 1.00000 |
| 229 | -5.6951 | 1.00000 |
| 230 | -5.6379 | 1.00000 |
| 231 | -5.6254 | 1.00000 |
| 232 | -5.5465 | 1.00000 |
| 233 | -5.5257 | 1.00000 |
| 234 | -5.4438 | 1.00000 |
| 235 | -5.4144 | 1.00000 |

|     |         |         |
|-----|---------|---------|
| 236 | -5.1450 | 1.00000 |
| 237 | -5.0625 | 1.00000 |
| 238 | -5.0287 | 1.00000 |
| 239 | -5.0250 | 1.00000 |
| 240 | -4.9622 | 1.00000 |
| 241 | -4.8802 | 1.00000 |
| 242 | -4.8569 | 1.00000 |
| 243 | -4.8056 | 1.00000 |
| 244 | -4.7804 | 1.00000 |
| 245 | -4.6523 | 1.00000 |
| 246 | -4.5813 | 1.00000 |
| 247 | -4.5782 | 1.00000 |
| 248 | -4.4784 | 1.00000 |
| 249 | -4.4237 | 1.00000 |
| 250 | -4.3976 | 1.00000 |
| 251 | -4.2989 | 1.00000 |
| 252 | -4.2298 | 1.00000 |
| 253 | -4.1777 | 1.00000 |
| 254 | -3.5382 | 1.00000 |
| 255 | -3.3117 | 1.00000 |
| 256 | -3.1454 | 1.00000 |
| 257 | -2.9464 | 1.00000 |

|     |         |         |
|-----|---------|---------|
| 258 | -2.8018 | 1.00000 |
| 259 | -2.7430 | 1.00000 |
| 260 | -2.0636 | 0.00000 |
| 261 | -1.9167 | 0.00000 |
| 262 | -1.7256 | 0.00000 |
| 263 | -1.6821 | 0.00000 |
| 264 | -1.3177 | 0.00000 |
| 265 | -1.2865 | 0.00000 |
| 266 | -1.1648 | 0.00000 |
| 267 | -0.7293 | 0.00000 |
| 268 | -0.5865 | 0.00000 |
| 269 | -0.5135 | 0.00000 |
| 270 | -0.2832 | 0.00000 |
| 271 | -0.2802 | 0.00000 |
| 272 | -0.2625 | 0.00000 |
| 273 | -0.1592 | 0.00000 |
| 274 | -0.0610 | 0.00000 |
| 275 | -0.0511 | 0.00000 |
| 276 | 0.0105  | 0.00000 |
| 277 | 0.0376  | 0.00000 |
| 278 | 0.0759  | 0.00000 |
| 279 | 0.2058  | 0.00000 |

|     |        |         |
|-----|--------|---------|
| 280 | 0.2532 | 0.00000 |
| 281 | 0.2772 | 0.00000 |
| 282 | 0.4315 | 0.00000 |
| 283 | 0.4491 | 0.00000 |
| 284 | 0.4807 | 0.00000 |
| 285 | 0.6015 | 0.00000 |
| 286 | 0.6873 | 0.00000 |
| 287 | 0.8211 | 0.00000 |
| 288 | 0.8781 | 0.00000 |
| 289 | 1.0558 | 0.00000 |
| 290 | 1.1035 | 0.00000 |
| 291 | 1.1388 | 0.00000 |
| 292 | 1.1747 | 0.00000 |
| 293 | 1.2311 | 0.00000 |
| 294 | 1.2494 | 0.00000 |
| 295 | 1.3073 | 0.00000 |
| 296 | 1.3189 | 0.00000 |
| 297 | 1.3589 | 0.00000 |
| 298 | 1.4289 | 0.00000 |
| 299 | 1.4769 | 0.00000 |
| 300 | 1.4997 | 0.00000 |
| 301 | 1.5759 | 0.00000 |

|     |        |         |
|-----|--------|---------|
| 302 | 1.6018 | 0.00000 |
| 303 | 1.6482 | 0.00000 |
| 304 | 1.6854 | 0.00000 |
| 305 | 1.7571 | 0.00000 |
| 306 | 1.7719 | 0.00000 |
| 307 | 1.8767 | 0.00000 |
| 308 | 1.8971 | 0.00000 |
| 309 | 1.9058 | 0.00000 |
| 310 | 1.9174 | 0.00000 |
| 311 | 2.1404 | 0.00000 |
| 312 | 2.1989 | 0.00000 |
| 313 | 2.2188 | 0.00000 |
| 314 | 2.2511 | 0.00000 |
| 315 | 2.2881 | 0.00000 |
| 316 | 2.2959 | 0.00000 |
| 317 | 2.3363 | 0.00000 |
| 318 | 2.3599 | 0.00000 |
| 319 | 2.3814 | 0.00000 |
| 320 | 2.4063 | 0.00000 |
| 321 | 2.4256 | 0.00000 |
| 322 | 2.4344 | 0.00000 |
| 323 | 2.4454 | 0.00000 |

|     |        |         |
|-----|--------|---------|
| 324 | 2.4579 | 0.00000 |
| 325 | 2.4662 | 0.00000 |
| 326 | 2.5286 | 0.00000 |
| 327 | 2.5459 | 0.00000 |
| 328 | 2.7056 | 0.00000 |
| 329 | 2.7348 | 0.00000 |
| 330 | 2.7521 | 0.00000 |
| 331 | 2.7584 | 0.00000 |
| 332 | 2.7737 | 0.00000 |
| 333 | 2.8253 | 0.00000 |
| 334 | 2.8450 | 0.00000 |
| 335 | 2.8726 | 0.00000 |
| 336 | 2.9020 | 0.00000 |
| 337 | 2.9317 | 0.00000 |
| 338 | 2.9545 | 0.00000 |
| 339 | 2.9827 | 0.00000 |
| 340 | 3.0059 | 0.00000 |
| 341 | 3.0372 | 0.00000 |
| 342 | 3.0490 | 0.00000 |
| 343 | 3.0714 | 0.00000 |
| 344 | 3.0915 | 0.00000 |
| 345 | 3.1530 | 0.00000 |

|     |        |         |
|-----|--------|---------|
| 346 | 3.1699 | 0.00000 |
| 347 | 3.1879 | 0.00000 |
| 348 | 3.2001 | 0.00000 |
| 349 | 3.3075 | 0.00000 |
| 350 | 3.3282 | 0.00000 |
| 351 | 3.3613 | 0.00000 |
| 352 | 3.3717 | 0.00000 |
| 353 | 3.3927 | 0.00000 |
| 354 | 3.4398 | 0.00000 |
| 355 | 3.4818 | 0.00000 |
| 356 | 3.4904 | 0.00000 |
| 357 | 3.4923 | 0.00000 |
| 358 | 3.5029 | 0.00000 |
| 359 | 3.6398 | 0.00000 |
| 360 | 3.6767 | 0.00000 |
| 361 | 3.6998 | 0.00000 |
| 362 | 3.7381 | 0.00000 |
| 363 | 3.7534 | 0.00000 |
| 364 | 3.7595 | 0.00000 |
| 365 | 3.7766 | 0.00000 |
| 366 | 3.7973 | 0.00000 |
| 367 | 3.8134 | 0.00000 |

|     |        |         |
|-----|--------|---------|
| 368 | 3.8398 | 0.00000 |
| 369 | 3.8466 | 0.00000 |
| 370 | 3.8649 | 0.00000 |
| 371 | 3.8792 | 0.00000 |
| 372 | 3.8919 | 0.00000 |
| 373 | 3.9200 | 0.00000 |
| 374 | 3.9344 | 0.00000 |
| 375 | 3.9471 | 0.00000 |
| 376 | 3.9588 | 0.00000 |
| 377 | 3.9827 | 0.00000 |
| 378 | 3.9869 | 0.00000 |
| 379 | 4.0215 | 0.00000 |
| 380 | 4.0774 | 0.00000 |
| 381 | 4.1710 | 0.00000 |
| 382 | 4.2595 | 0.00000 |
| 383 | 4.2621 | 0.00000 |
| 384 | 4.2695 | 0.00000 |
| 385 | 4.2931 | 0.00000 |
| 386 | 4.3217 | 0.00000 |
| 387 | 4.3348 | 0.00000 |
| 388 | 4.3505 | 0.00000 |
| 389 | 4.3802 | 0.00000 |

|     |        |         |
|-----|--------|---------|
| 390 | 4.3849 | 0.00000 |
| 391 | 4.4232 | 0.00000 |
| 392 | 4.4487 | 0.00000 |
| 393 | 4.4747 | 0.00000 |
| 394 | 4.4832 | 0.00000 |
| 395 | 4.4919 | 0.00000 |
| 396 | 4.4995 | 0.00000 |
| 397 | 4.5216 | 0.00000 |
| 398 | 4.5545 | 0.00000 |
| 399 | 4.5925 | 0.00000 |
| 400 | 4.6106 | 0.00000 |
| 401 | 4.6282 | 0.00000 |
| 402 | 4.6459 | 0.00000 |
| 403 | 4.6595 | 0.00000 |
| 404 | 4.6849 | 0.00000 |
| 405 | 4.7082 | 0.00000 |
| 406 | 4.7367 | 0.00000 |
| 407 | 4.7512 | 0.00000 |
| 408 | 4.7705 | 0.00000 |
| 409 | 4.7859 | 0.00000 |
| 410 | 4.7884 | 0.00000 |
| 411 | 4.8024 | 0.00000 |

|     |        |         |
|-----|--------|---------|
| 412 | 4.8332 | 0.00000 |
| 413 | 4.8671 | 0.00000 |
| 414 | 4.8843 | 0.00000 |
| 415 | 4.9023 | 0.00000 |
| 416 | 4.9420 | 0.00000 |
| 417 | 4.9929 | 0.00000 |
| 418 | 5.0094 | 0.00000 |
| 419 | 5.0127 | 0.00000 |
| 420 | 5.0378 | 0.00000 |
| 421 | 5.0440 | 0.00000 |
| 422 | 5.0678 | 0.00000 |
| 423 | 5.0857 | 0.00000 |
| 424 | 5.1181 | 0.00000 |
| 425 | 5.1212 | 0.00000 |
| 426 | 5.1409 | 0.00000 |
| 427 | 5.1441 | 0.00000 |
| 428 | 5.1691 | 0.00000 |
| 429 | 5.1793 | 0.00000 |
| 430 | 5.1882 | 0.00000 |
| 431 | 5.1929 | 0.00000 |
| 432 | 5.2221 | 0.00000 |
| 433 | 5.2369 | 0.00000 |

|     |        |         |
|-----|--------|---------|
| 434 | 5.2452 | 0.00000 |
| 435 | 5.2616 | 0.00000 |
| 436 | 5.2970 | 0.00000 |
| 437 | 5.3017 | 0.00000 |
| 438 | 5.3113 | 0.00000 |
| 439 | 5.3359 | 0.00000 |
| 440 | 5.3525 | 0.00000 |
| 441 | 5.3702 | 0.00000 |
| 442 | 5.3800 | 0.00000 |
| 443 | 5.3940 | 0.00000 |
| 444 | 5.4289 | 0.00000 |
| 445 | 5.4591 | 0.00000 |
| 446 | 5.4684 | 0.00000 |
| 447 | 5.4866 | 0.00000 |
| 448 | 5.4990 | 0.00000 |
| 449 | 5.5238 | 0.00000 |
| 450 | 5.5670 | 0.00000 |
| 451 | 5.5722 | 0.00000 |
| 452 | 5.5936 | 0.00000 |
| 453 | 5.6077 | 0.00000 |
| 454 | 5.6233 | 0.00000 |
| 455 | 5.6691 | 0.00000 |

|     |        |         |
|-----|--------|---------|
| 456 | 5.6909 | 0.00000 |
| 457 | 5.7180 | 0.00000 |
| 458 | 5.7271 | 0.00000 |
| 459 | 5.7484 | 0.00000 |
| 460 | 5.7626 | 0.00000 |
| 461 | 5.7889 | 0.00000 |
| 462 | 5.7914 | 0.00000 |
| 463 | 5.7971 | 0.00000 |
| 464 | 5.8035 | 0.00000 |
| 465 | 5.8197 | 0.00000 |
| 466 | 5.8253 | 0.00000 |
| 467 | 5.8540 | 0.00000 |
| 468 | 5.8610 | 0.00000 |
| 469 | 5.8801 | 0.00000 |
| 470 | 5.8853 | 0.00000 |
| 471 | 5.8897 | 0.00000 |
| 472 | 5.9060 | 0.00000 |
| 473 | 5.9203 | 0.00000 |
| 474 | 5.9468 | 0.00000 |
| 475 | 5.9514 | 0.00000 |
| 476 | 5.9690 | 0.00000 |
| 477 | 5.9755 | 0.00000 |

|     |        |         |
|-----|--------|---------|
| 478 | 5.9883 | 0.00000 |
| 479 | 6.0092 | 0.00000 |
| 480 | 6.0414 | 0.00000 |

-----

soft charge-density along one line, spin component

1

|   |   |   |   |   |   |   |   |
|---|---|---|---|---|---|---|---|
| 0 | 1 | 2 | 3 | 4 | 5 | 6 | 7 |
|---|---|---|---|---|---|---|---|

8 9

total charge-density along one line

soft charge-density along one line, spin component

2

|   |   |   |   |   |   |   |   |
|---|---|---|---|---|---|---|---|
| 0 | 1 | 2 | 3 | 4 | 5 | 6 | 7 |
|---|---|---|---|---|---|---|---|

8 9

total charge-density along one line

pseudopotential strength for first ion, spin component:

1

|        |        |        |       |       |
|--------|--------|--------|-------|-------|
| -2.331 | -4.014 | -0.002 | 0.000 | 0.000 |
|--------|--------|--------|-------|-------|

|        |        |        |       |        |
|--------|--------|--------|-------|--------|
| -4.014 | -6.828 | -0.006 | 0.000 | -0.000 |
|--------|--------|--------|-------|--------|

|        |        |        |        |       |
|--------|--------|--------|--------|-------|
| -0.002 | -0.006 | -0.336 | -0.000 | 0.000 |
|--------|--------|--------|--------|-------|

0.000 0.000 -0.000 -0.341 -0.000

0.000 -0.000 0.000 -0.000 -0.341

pseudopotential strength for first ion, spin component: 2

-2.331 -4.014 -0.002 0.000 0.000

-4.014 -6.828 -0.006 0.000 -0.000

-0.002 -0.006 -0.336 -0.000 0.000

0.000 0.000 -0.000 -0.341 -0.000

0.000 -0.000 0.000 -0.000 -0.341

total augmentation occupancy for first ion, spin component: 1

3.579 -0.646 0.444 -0.034 -0.000

-0.646 0.130 -0.082 0.006 0.000

0.444 -0.082 0.056 -0.003 -0.000

-0.034 0.006 -0.003 0.011 0.000

-0.000 0.000 -0.000 0.000 0.007

total augmentation occupancy for first ion, spin component: 2

-0.000 0.000 -0.000 0.000 0.000

0.000 -0.000 0.000 -0.000 -0.000

-0.000 0.000 -0.000 -0.000 -0.000

0.000 -0.000 -0.000 -0.000 -0.000

0.000 -0.000 -0.000 -0.000 -0.000

----- aborting loop because EDIFF is reached -----

total charge

| # of ion | s     | p     | d     | tot   |
|----------|-------|-------|-------|-------|
| 1        | 0.646 | 0.043 | 0.000 | 0.690 |
| 2        | 0.646 | 0.043 | 0.000 | 0.690 |
| 3        | 0.646 | 0.043 | 0.000 | 0.690 |
| 4        | 0.646 | 0.043 | 0.000 | 0.690 |
| 5        | 0.646 | 0.043 | 0.000 | 0.690 |
| 6        | 0.646 | 0.043 | 0.000 | 0.690 |
| 7        | 0.646 | 0.043 | 0.000 | 0.690 |
| 8        | 0.646 | 0.043 | 0.000 | 0.690 |
| 9        | 0.646 | 0.043 | 0.000 | 0.690 |
| 10       | 0.646 | 0.043 | 0.000 | 0.690 |
| 11       | 0.646 | 0.043 | 0.000 | 0.690 |
| 12       | 0.646 | 0.043 | 0.000 | 0.690 |

|    |       |       |       |       |
|----|-------|-------|-------|-------|
| 13 | 0.646 | 0.043 | 0.000 | 0.689 |
| 14 | 0.646 | 0.043 | 0.000 | 0.689 |
| 15 | 0.648 | 0.045 | 0.000 | 0.693 |
| 16 | 0.646 | 0.043 | 0.000 | 0.689 |
| 17 | 0.646 | 0.043 | 0.000 | 0.689 |
| 18 | 0.646 | 0.043 | 0.000 | 0.689 |
| 19 | 0.646 | 0.043 | 0.000 | 0.689 |
| 20 | 0.646 | 0.043 | 0.000 | 0.689 |
| 21 | 0.646 | 0.043 | 0.000 | 0.689 |
| 22 | 0.646 | 0.044 | 0.000 | 0.690 |
| 23 | 0.542 | 0.015 | 0.000 | 0.557 |
| 24 | 0.541 | 0.015 | 0.000 | 0.556 |
| 25 | 0.870 | 1.763 | 0.000 | 2.633 |
| 26 | 0.867 | 1.785 | 0.000 | 2.653 |
| 27 | 0.867 | 1.786 | 0.000 | 2.653 |
| 28 | 0.870 | 1.762 | 0.000 | 2.632 |
| 29 | 0.865 | 1.783 | 0.000 | 2.648 |
| 30 | 0.870 | 1.763 | 0.000 | 2.633 |
| 31 | 0.867 | 1.786 | 0.000 | 2.653 |
| 32 | 0.867 | 1.786 | 0.000 | 2.653 |
| 33 | 0.870 | 1.762 | 0.000 | 2.632 |
| 34 | 0.865 | 1.783 | 0.000 | 2.648 |

|    |       |       |       |       |
|----|-------|-------|-------|-------|
| 35 | 0.870 | 1.763 | 0.000 | 2.633 |
| 36 | 0.868 | 1.787 | 0.000 | 2.654 |
| 37 | 0.867 | 1.786 | 0.000 | 2.653 |
| 38 | 0.870 | 1.763 | 0.000 | 2.633 |
| 39 | 0.865 | 1.784 | 0.000 | 2.649 |
| 40 | 0.870 | 1.763 | 0.000 | 2.633 |
| 41 | 0.868 | 1.787 | 0.000 | 2.655 |
| 42 | 0.867 | 1.786 | 0.000 | 2.653 |
| 43 | 0.871 | 1.764 | 0.000 | 2.634 |
| 44 | 0.865 | 1.783 | 0.000 | 2.648 |
| 45 | 0.870 | 1.763 | 0.000 | 2.633 |
| 46 | 0.867 | 1.786 | 0.000 | 2.653 |
| 47 | 0.867 | 1.786 | 0.000 | 2.653 |
| 48 | 0.871 | 1.763 | 0.000 | 2.634 |
| 49 | 0.865 | 1.783 | 0.000 | 2.648 |
| 50 | 0.870 | 1.763 | 0.000 | 2.633 |
| 51 | 0.867 | 1.786 | 0.000 | 2.653 |
| 52 | 0.867 | 1.786 | 0.000 | 2.653 |
| 53 | 0.870 | 1.762 | 0.000 | 2.632 |
| 54 | 0.865 | 1.784 | 0.000 | 2.648 |
| 55 | 0.865 | 1.784 | 0.000 | 2.649 |
| 56 | 0.865 | 1.786 | 0.000 | 2.651 |

|    |       |       |       |       |
|----|-------|-------|-------|-------|
| 57 | 0.866 | 1.787 | 0.000 | 2.653 |
| 58 | 0.866 | 1.790 | 0.000 | 2.656 |
| 59 | 0.865 | 1.786 | 0.000 | 2.651 |
| 60 | 0.866 | 1.786 | 0.000 | 2.651 |
| 61 | 0.866 | 1.788 | 0.000 | 2.654 |
| 62 | 0.867 | 1.791 | 0.000 | 2.658 |
| 63 | 0.865 | 1.784 | 0.000 | 2.649 |
| 64 | 0.865 | 1.786 | 0.000 | 2.651 |
| 65 | 0.866 | 1.787 | 0.000 | 2.652 |
| 66 | 0.865 | 1.788 | 0.000 | 2.653 |
| 67 | 0.865 | 1.786 | 0.000 | 2.651 |
| 68 | 0.866 | 1.785 | 0.000 | 2.651 |
| 69 | 0.865 | 1.787 | 0.000 | 2.652 |
| 70 | 0.866 | 1.787 | 0.000 | 2.653 |
| 71 | 0.865 | 1.784 | 0.000 | 2.649 |
| 72 | 0.865 | 1.786 | 0.000 | 2.651 |
| 73 | 0.866 | 1.786 | 0.000 | 2.652 |
| 74 | 0.864 | 1.785 | 0.000 | 2.649 |
| 75 | 0.865 | 1.786 | 0.000 | 2.651 |
| 76 | 0.866 | 1.786 | 0.000 | 2.651 |
| 77 | 0.865 | 1.786 | 0.000 | 2.651 |
| 78 | 0.865 | 1.784 | 0.000 | 2.649 |

|     |       |       |       |       |
|-----|-------|-------|-------|-------|
| 79  | 0.865 | 1.784 | 0.000 | 2.649 |
| 80  | 0.865 | 1.786 | 0.000 | 2.651 |
| 81  | 0.865 | 1.785 | 0.000 | 2.650 |
| 82  | 0.863 | 1.782 | 0.000 | 2.645 |
| 83  | 0.865 | 1.786 | 0.000 | 2.651 |
| 84  | 0.866 | 1.786 | 0.000 | 2.651 |
| 85  | 0.865 | 1.784 | 0.000 | 2.648 |
| 86  | 0.862 | 1.774 | 0.000 | 2.636 |
| 87  | 0.865 | 1.784 | 0.000 | 2.649 |
| 88  | 0.865 | 1.787 | 0.000 | 2.652 |
| 89  | 0.865 | 1.785 | 0.000 | 2.650 |
| 90  | 0.865 | 1.788 | 0.000 | 2.653 |
| 91  | 0.865 | 1.786 | 0.000 | 2.651 |
| 92  | 0.866 | 1.786 | 0.000 | 2.651 |
| 93  | 0.864 | 1.783 | 0.000 | 2.647 |
| 94  | 0.866 | 1.785 | 0.000 | 2.651 |
| 95  | 0.865 | 1.784 | 0.000 | 2.649 |
| 96  | 0.865 | 1.786 | 0.000 | 2.651 |
| 97  | 0.866 | 1.787 | 0.000 | 2.653 |
| 98  | 0.866 | 1.789 | 0.000 | 2.655 |
| 99  | 0.865 | 1.786 | 0.000 | 2.651 |
| 100 | 0.866 | 1.786 | 0.000 | 2.651 |

|     |       |       |       |       |
|-----|-------|-------|-------|-------|
| 101 | 0.865 | 1.787 | 0.000 | 2.652 |
| 102 | 0.867 | 1.790 | 0.000 | 2.657 |
| 103 | 0.865 | 1.786 | 0.000 | 2.651 |
| 104 | 0.867 | 1.785 | 0.000 | 2.653 |
| 105 | 0.866 | 1.786 | 0.000 | 2.652 |
| 106 | 0.870 | 1.778 | 0.000 | 2.648 |
| 107 | 0.869 | 1.765 | 0.000 | 2.635 |
| 108 | 0.865 | 1.783 | 0.000 | 2.648 |
| 109 | 0.869 | 1.789 | 0.000 | 2.658 |
| 110 | 0.865 | 1.786 | 0.000 | 2.651 |
| 111 | 0.867 | 1.785 | 0.000 | 2.653 |
| 112 | 0.867 | 1.789 | 0.000 | 2.655 |
| 113 | 0.871 | 1.782 | 0.000 | 2.653 |
| 114 | 0.869 | 1.765 | 0.000 | 2.634 |
| 115 | 0.865 | 1.783 | 0.000 | 2.648 |
| 116 | 0.870 | 1.791 | 0.000 | 2.661 |
| 117 | 0.865 | 1.786 | 0.000 | 2.651 |
| 118 | 0.867 | 1.786 | 0.000 | 2.653 |
| 119 | 0.865 | 1.782 | 0.000 | 2.647 |
| 120 | 0.858 | 1.707 | 0.000 | 2.564 |
| 121 | 0.869 | 1.765 | 0.000 | 2.634 |
| 122 | 0.865 | 1.783 | 0.000 | 2.648 |

|     |       |       |       |       |
|-----|-------|-------|-------|-------|
| 123 | 0.866 | 1.778 | 0.000 | 2.644 |
| 124 | 0.866 | 1.786 | 0.000 | 2.652 |
| 125 | 0.868 | 1.785 | 0.000 | 2.653 |
| 126 | 0.862 | 1.776 | 0.000 | 2.638 |
| 127 | 0.849 | 1.830 | 0.000 | 2.679 |
| 128 | 0.870 | 1.767 | 0.000 | 2.637 |
| 129 | 0.865 | 1.783 | 0.000 | 2.648 |
| 130 | 0.860 | 1.757 | 0.000 | 2.617 |
| 131 | 0.866 | 1.786 | 0.000 | 2.652 |
| 132 | 0.867 | 1.784 | 0.000 | 2.652 |
| 133 | 0.864 | 1.787 | 0.000 | 2.651 |
| 134 | 0.869 | 1.789 | 0.000 | 2.659 |
| 135 | 0.869 | 1.767 | 0.000 | 2.636 |
| 136 | 0.865 | 1.783 | 0.000 | 2.648 |
| 137 | 0.866 | 1.772 | 0.000 | 2.638 |
| 138 | 0.866 | 1.786 | 0.000 | 2.652 |
| 139 | 0.867 | 1.785 | 0.000 | 2.652 |
| 140 | 0.866 | 1.788 | 0.000 | 2.654 |
| 141 | 0.870 | 1.779 | 0.000 | 2.649 |
| 142 | 0.869 | 1.766 | 0.000 | 2.635 |
| 143 | 0.865 | 1.783 | 0.000 | 2.648 |
| 144 | 0.869 | 1.790 | 0.000 | 2.659 |

|       |         |         |       |         |
|-------|---------|---------|-------|---------|
| 145   | 0.938   | 1.707   | 0.000 | 2.645   |
| 146   | 1.240   | 1.546   | 0.074 | 2.860   |
| 147   | 1.632   | 3.514   | 0.000 | 5.146   |
| ----- |         |         |       |         |
| tot   | 123.057 | 221.523 | 0.074 | 344.655 |

magnetization (x)

| # of ion | s      | p      | d     | tot    |
|----------|--------|--------|-------|--------|
| -----    |        |        |       |        |
| 1        | 0.000  | -0.000 | 0.000 | 0.000  |
| 2        | -0.000 | 0.000  | 0.000 | -0.000 |
| 3        | 0.000  | -0.000 | 0.000 | 0.000  |
| 4        | -0.000 | 0.000  | 0.000 | -0.000 |
| 5        | 0.000  | -0.000 | 0.000 | 0.000  |
| 6        | -0.000 | 0.000  | 0.000 | -0.000 |
| 7        | 0.000  | -0.000 | 0.000 | 0.000  |
| 8        | -0.000 | 0.000  | 0.000 | -0.000 |
| 9        | 0.000  | -0.000 | 0.000 | 0.000  |
| 10       | -0.000 | 0.000  | 0.000 | -0.000 |

|    |        |        |       |        |
|----|--------|--------|-------|--------|
| 11 | 0.000  | -0.000 | 0.000 | 0.000  |
| 12 | -0.000 | 0.000  | 0.000 | -0.000 |
| 13 | 0.000  | -0.000 | 0.000 | 0.000  |
| 14 | -0.004 | 0.002  | 0.000 | -0.002 |
| 15 | 0.000  | -0.000 | 0.000 | 0.000  |
| 16 | -0.004 | 0.002  | 0.000 | -0.002 |
| 17 | -0.004 | 0.002  | 0.000 | -0.002 |
| 18 | 0.000  | -0.000 | 0.000 | 0.000  |
| 19 | -0.003 | 0.001  | 0.000 | -0.002 |
| 20 | 0.000  | -0.000 | 0.000 | 0.000  |
| 21 | -0.003 | 0.002  | 0.000 | -0.002 |
| 22 | -0.003 | 0.002  | 0.000 | -0.002 |
| 23 | -0.000 | 0.000  | 0.000 | -0.000 |
| 24 | -0.000 | 0.000  | 0.000 | -0.000 |
| 25 | -0.000 | -0.007 | 0.000 | -0.008 |
| 26 | -0.000 | -0.002 | 0.000 | -0.002 |
| 27 | 0.000  | 0.003  | 0.000 | 0.003  |
| 28 | 0.000  | 0.005  | 0.000 | 0.005  |
| 29 | 0.000  | 0.003  | 0.000 | 0.003  |
| 30 | -0.000 | -0.007 | 0.000 | -0.008 |
| 31 | -0.000 | -0.002 | 0.000 | -0.002 |
| 32 | 0.000  | 0.003  | 0.000 | 0.003  |

|    |        |        |       |        |
|----|--------|--------|-------|--------|
| 33 | 0.000  | 0.005  | 0.000 | 0.005  |
| 34 | 0.000  | 0.002  | 0.000 | 0.002  |
| 35 | -0.000 | -0.007 | 0.000 | -0.008 |
| 36 | -0.000 | -0.002 | 0.000 | -0.002 |
| 37 | 0.000  | 0.003  | 0.000 | 0.003  |
| 38 | 0.000  | 0.006  | 0.000 | 0.007  |
| 39 | 0.000  | 0.002  | 0.000 | 0.002  |
| 40 | -0.000 | -0.007 | 0.000 | -0.008 |
| 41 | -0.000 | -0.002 | 0.000 | -0.002 |
| 42 | 0.000  | 0.002  | 0.000 | 0.003  |
| 43 | 0.000  | 0.005  | 0.000 | 0.006  |
| 44 | 0.000  | 0.004  | 0.000 | 0.004  |
| 45 | -0.000 | -0.007 | 0.000 | -0.008 |
| 46 | -0.000 | -0.002 | 0.000 | -0.002 |
| 47 | 0.000  | 0.003  | 0.000 | 0.003  |
| 48 | 0.000  | 0.005  | 0.000 | 0.006  |
| 49 | 0.000  | 0.001  | 0.000 | 0.002  |
| 50 | -0.000 | -0.007 | 0.000 | -0.008 |
| 51 | -0.000 | -0.002 | 0.000 | -0.002 |
| 52 | 0.000  | 0.002  | 0.000 | 0.003  |
| 53 | 0.000  | 0.006  | 0.000 | 0.007  |
| 54 | 0.000  | 0.002  | 0.000 | 0.002  |

|    |        |        |       |        |
|----|--------|--------|-------|--------|
| 55 | -0.000 | -0.005 | 0.000 | -0.006 |
| 56 | -0.000 | -0.007 | 0.000 | -0.007 |
| 57 | -0.000 | -0.001 | 0.000 | -0.001 |
| 58 | -0.000 | -0.001 | 0.000 | -0.001 |
| 59 | 0.000  | 0.006  | 0.000 | 0.007  |
| 60 | 0.000  | 0.003  | 0.000 | 0.003  |
| 61 | 0.000  | 0.001  | 0.000 | 0.001  |
| 62 | 0.000  | 0.003  | 0.000 | 0.003  |
| 63 | -0.000 | -0.005 | 0.000 | -0.006 |
| 64 | -0.000 | -0.007 | 0.000 | -0.007 |
| 65 | -0.000 | -0.001 | 0.000 | -0.001 |
| 66 | -0.000 | -0.001 | 0.000 | -0.001 |
| 67 | 0.000  | 0.006  | 0.000 | 0.006  |
| 68 | 0.000  | 0.003  | 0.000 | 0.003  |
| 69 | 0.000  | 0.001  | 0.000 | 0.001  |
| 70 | 0.000  | 0.002  | 0.000 | 0.002  |
| 71 | -0.000 | -0.005 | 0.000 | -0.006 |
| 72 | -0.000 | -0.007 | 0.000 | -0.007 |
| 73 | -0.000 | -0.001 | 0.000 | -0.001 |
| 74 | -0.000 | -0.002 | 0.000 | -0.002 |
| 75 | 0.000  | 0.006  | 0.000 | 0.007  |
| 76 | 0.000  | 0.003  | 0.000 | 0.004  |

|    |        |        |       |        |
|----|--------|--------|-------|--------|
| 77 | 0.000  | 0.003  | 0.000 | 0.003  |
| 78 | 0.000  | 0.001  | 0.000 | 0.001  |
| 79 | -0.000 | -0.005 | 0.000 | -0.006 |
| 80 | -0.000 | -0.007 | 0.000 | -0.007 |
| 81 | -0.000 | -0.001 | 0.000 | -0.002 |
| 82 | -0.000 | -0.002 | 0.000 | -0.002 |
| 83 | 0.001  | 0.007  | 0.000 | 0.008  |
| 84 | 0.000  | 0.003  | 0.000 | 0.003  |
| 85 | 0.000  | 0.002  | 0.000 | 0.002  |
| 86 | 0.000  | 0.005  | 0.000 | 0.006  |
| 87 | -0.000 | -0.005 | 0.000 | -0.005 |
| 88 | -0.000 | -0.007 | 0.000 | -0.007 |
| 89 | -0.000 | -0.001 | 0.000 | -0.002 |
| 90 | -0.000 | -0.002 | 0.000 | -0.002 |
| 91 | 0.001  | 0.008  | 0.000 | 0.008  |
| 92 | 0.000  | 0.003  | 0.000 | 0.003  |
| 93 | 0.000  | 0.002  | 0.000 | 0.003  |
| 94 | 0.000  | 0.001  | 0.000 | 0.001  |
| 95 | -0.000 | -0.005 | 0.000 | -0.006 |
| 96 | -0.000 | -0.007 | 0.000 | -0.007 |
| 97 | -0.000 | -0.001 | 0.000 | -0.001 |
| 98 | -0.000 | -0.001 | 0.000 | -0.001 |

|     |        |        |       |        |
|-----|--------|--------|-------|--------|
| 99  | 0.001  | 0.007  | 0.000 | 0.007  |
| 100 | 0.000  | 0.003  | 0.000 | 0.004  |
| 101 | 0.000  | 0.003  | 0.000 | 0.003  |
| 102 | 0.000  | 0.002  | 0.000 | 0.002  |
| 103 | -0.001 | -0.010 | 0.000 | -0.011 |
| 104 | -0.003 | -0.028 | 0.000 | -0.031 |
| 105 | -0.000 | -0.001 | 0.000 | -0.002 |
| 106 | -0.000 | -0.004 | 0.000 | -0.005 |
| 107 | 0.007  | 0.116  | 0.000 | 0.122  |
| 108 | 0.001  | 0.010  | 0.000 | 0.011  |
| 109 | 0.000  | 0.001  | 0.000 | 0.001  |
| 110 | -0.001 | -0.010 | 0.000 | -0.011 |
| 111 | -0.003 | -0.028 | 0.000 | -0.031 |
| 112 | -0.000 | -0.001 | 0.000 | -0.002 |
| 113 | -0.000 | -0.003 | 0.000 | -0.004 |
| 114 | 0.007  | 0.120  | 0.000 | 0.127  |
| 115 | 0.001  | 0.010  | 0.000 | 0.011  |
| 116 | 0.000  | 0.001  | 0.000 | 0.002  |
| 117 | -0.001 | -0.010 | 0.000 | -0.011 |
| 118 | -0.003 | -0.026 | 0.000 | -0.029 |
| 119 | -0.000 | -0.002 | 0.000 | -0.002 |
| 120 | -0.000 | -0.002 | 0.000 | -0.002 |

|     |        |        |       |        |
|-----|--------|--------|-------|--------|
| 121 | 0.007  | 0.115  | 0.000 | 0.122  |
| 122 | 0.001  | 0.010  | 0.000 | 0.010  |
| 123 | 0.000  | 0.003  | 0.000 | 0.003  |
| 124 | -0.001 | -0.010 | 0.000 | -0.011 |
| 125 | -0.003 | -0.024 | 0.000 | -0.027 |
| 126 | -0.000 | -0.002 | 0.000 | -0.002 |
| 127 | -0.000 | 0.001  | 0.000 | 0.001  |
| 128 | 0.006  | 0.105  | 0.000 | 0.111  |
| 129 | 0.001  | 0.009  | 0.000 | 0.010  |
| 130 | 0.000  | 0.004  | 0.000 | 0.004  |
| 131 | -0.001 | -0.009 | 0.000 | -0.010 |
| 132 | -0.003 | -0.024 | 0.000 | -0.027 |
| 133 | -0.000 | -0.002 | 0.000 | -0.002 |
| 134 | -0.000 | -0.002 | 0.000 | -0.002 |
| 135 | 0.006  | 0.097  | 0.000 | 0.102  |
| 136 | 0.001  | 0.009  | 0.000 | 0.010  |
| 137 | 0.000  | 0.004  | 0.000 | 0.005  |
| 138 | -0.001 | -0.010 | 0.000 | -0.011 |
| 139 | -0.003 | -0.026 | 0.000 | -0.029 |
| 140 | -0.000 | -0.002 | 0.000 | -0.002 |
| 141 | -0.000 | -0.003 | 0.000 | -0.004 |
| 142 | 0.006  | 0.105  | 0.000 | 0.111  |

|     |        |       |        |       |
|-----|--------|-------|--------|-------|
| 143 | 0.001  | 0.010 | 0.000  | 0.010 |
| 144 | 0.000  | 0.002 | 0.000  | 0.003 |
| 145 | 0.000  | 0.005 | 0.000  | 0.006 |
| 146 | -0.000 | 0.000 | -0.000 | 0.000 |
| 147 | 0.000  | 0.004 | 0.000  | 0.004 |

-----

|     |       |       |        |       |
|-----|-------|-------|--------|-------|
| tot | 0.001 | 0.513 | -0.000 | 0.514 |
|-----|-------|-------|--------|-------|

|         |          |         |           |        |
|---------|----------|---------|-----------|--------|
| CHARGE: | cpu time | 0.5240: | real time | 0.5257 |
| FORLOC: | cpu time | 0.0201: | real time | 0.0201 |
| FORNL : | cpu time | 2.0621: | real time | 2.0695 |
| STRESS: | cpu time | 6.1906: | real time | 6.2234 |
| FORCOR: | cpu time | 0.1444: | real time | 0.1467 |
| FORHAR: | cpu time | 0.0332: | real time | 0.0332 |
| MIXING: | cpu time | 0.0109: | real time | 0.0109 |
| OFIELD: | cpu time | 0.0001: | real time | 0.0001 |

-----

DFTD3 V3.0 Rev 1

Edisp (eV) -6.61762

E6 (eV): -3.9313

E8 (eV): -2.6864

% E8 : 40.59

FORVDW: cpu time 1.8462: real time 1.8740

FORCE on cell =-STRESS in cart. coord. units (eV):

| Direction | XX | YY | ZZ | XY | YZ | ZX |
|-----------|----|----|----|----|----|----|
|-----------|----|----|----|----|----|----|

-----  
Alpha Z 233.50077 233.50077 233.50077

Ewald 107573.96915 23465.01840-39717.09885 9.24782 3455.95470 128.35758

Hartree106090.43772 25023.78292-23786.10531 -6.78414 2948.89587 93.17815

E(xc) -1914.17382 -1916.53750 -1979.82649 0.13016 1.82426 0.13045

Local \*\*\*\*\*-53938.08770 56997.24171 0.79545 -6363.11138 -218.13863

n-local -472.57980 -482.30124 -439.47598 -0.66641 -0.64403 -0.31312

augment -38.29967 -38.56659 -34.32470 0.01357 -0.97993 0.00008

Kinetic 7634.81071 7638.77469 8713.33513 -3.06305 -41.83229 -3.22353

Fock 0.00000 0.00000 0.00000 0.00000 0.00000 0.00000

vdW -2.64272 -1.49191 -6.59373 0.00135 -0.07445 0.01110

-----  
Total -17.77497 -15.90815 -19.34745 -0.32523 0.03276 0.00209

in kB -4.90155 -4.38676 -5.33517 -0.08968 0.00903 0.00058

external pressure = -4.87 kB Pullay stress = 0.00 kB

VOLUME and BASIS-vectors are now :

-----

energy-cutoff : 400.00

volume of cell : 5810.14

direct lattice vectors

reciprocal lattice vectors

|              |              |              |             |             |             |
|--------------|--------------|--------------|-------------|-------------|-------------|
| 14.780600000 | 0.000000000  | 0.000000000  | 0.067656252 | 0.000000000 | 0.000000000 |
| 0.000000000  | 21.333900000 | 0.000000000  | 0.000000000 | 0.046873755 | 0.000000000 |
| 0.000000000  | 0.000000000  | 18.425700000 | 0.000000000 | 0.000000000 | 0.054272022 |

length of vectors

|              |              |              |             |             |             |
|--------------|--------------|--------------|-------------|-------------|-------------|
| 14.780600000 | 21.333900000 | 18.425700000 | 0.067656252 | 0.046873755 | 0.054272022 |
|--------------|--------------|--------------|-------------|-------------|-------------|

FORCES acting on ions

electron-ion (+dipol)

ewald-force

non-local-force

convergence-correction

-----

|           |           |           |           |           |           |           |           |   |
|-----------|-----------|-----------|-----------|-----------|-----------|-----------|-----------|---|
| 0.474E-02 | 0.154E+03 | 0.361E+02 | -.324E-02 | -.160E+03 | -.357E+02 | -.180E-02 | 0.566E+01 | - |
| .438E+00  | 0.203E-07 | -.442E-06 | -.639E-06 |           |           |           |           |   |
| -.184E-01 | 0.155E+03 | -.340E+02 | 0.160E-01 | -.160E+03 | 0.335E+02 | 0.116E-02 | 0.565E+01 |   |

0.541E+00 0.804E-06 0.275E-06 0.267E-06  
0.184E+00 0.154E+03 0.360E+02 -0.184E+00 -0.160E+03 -0.356E+02 0.690E-05 0.565E+01 -  
.443E+00 0.205E-06 -0.652E-06 -0.359E-06  
0.112E+00 0.155E+03 -0.341E+02 -0.987E-01 -0.160E+03 0.336E+02 -0.175E-01 0.565E+01  
0.535E+00 -0.457E-09 -0.698E-07 0.494E-06  
0.171E+00 0.154E+03 0.362E+02 -0.173E+00 -0.160E+03 -0.357E+02 0.116E-02 0.566E+01 -  
.440E+00 0.252E-06 -0.639E-06 -0.777E-06  
0.126E+00 0.154E+03 -0.340E+02 -0.108E+00 -0.160E+03 0.334E+02 -0.211E-01 0.565E+01  
0.541E+00 -0.745E-06 -0.137E-07 -0.302E-06  
-0.194E-01 0.154E+03 0.363E+02 0.183E-01 -0.160E+03 -0.359E+02 0.159E-02 0.566E+01 -  
.431E+00 0.529E-07 -0.477E-06 -0.146E-05  
-0.130E-01 0.154E+03 -0.338E+02 0.198E-01 -0.160E+03 0.332E+02 -0.721E-02 0.565E+01  
0.555E+00 -0.688E-06 0.561E-06 -0.132E-05  
-0.182E+00 0.154E+03 0.363E+02 0.182E+00 -0.160E+03 -0.359E+02 0.257E-03 0.566E+01 -  
.429E+00 -0.248E-06 -0.340E-06 -0.174E-05  
-0.128E+00 0.155E+03 -0.337E+02 0.115E+00 -0.160E+03 0.331E+02 0.109E-01 0.565E+01  
0.561E+00 -0.353E-07 0.793E-06 -0.153E-05  
-0.174E+00 0.154E+03 0.362E+02 0.175E+00 -0.160E+03 -0.358E+02 -0.176E-02 0.566E+01 -  
.432E+00 -0.279E-06 -0.270E-06 -0.132E-05  
-0.115E+00 0.155E+03 -0.338E+02 0.956E-01 -0.160E+03 0.332E+02 0.192E-01 0.565E+01  
0.555E+00 0.679E-06 0.762E-06 -0.762E-06  
0.228E+01 -0.150E+03 -0.386E+02 -0.227E+01 0.156E+03 0.386E+02 -0.103E-01 -0.566E+01

0.766E-01 - .491E-06 0.307E-06 -.154E-06  
-.412E+00 -.151E+03 0.388E+02 0.413E+00 0.157E+03 -.386E+02 -.127E-02 -.567E+01 -  
.269E+00 0.172E-06 0.547E-06 -.844E-07  
0.136E+02 -.146E+03 -.413E+02 -.138E+02 0.151E+03 0.413E+02 0.257E+00 -.567E+01 -  
.348E-01 -.754E-07 0.169E-06 0.100E-06  
0.162E+01 -.151E+03 0.402E+02 -.162E+01 0.156E+03 -.399E+02 -.101E-02 -.567E+01 -  
.229E+00 -.305E-06 0.273E-06 -.834E-06  
0.352E+01 -.149E+03 0.443E+02 -.352E+01 0.155E+03 -.441E+02 -.204E-02 -.567E+01 -  
.180E+00 -.540E-06 0.228E-06 -.601E-06  
-.148E+02 -.146E+03 -.330E+02 0.149E+02 0.151E+03 0.329E+02 -.950E-01 -.566E+01  
0.476E-01 0.519E-06 0.451E-06 -.721E-06  
-.297E+01 -.149E+03 0.432E+02 0.296E+01 0.155E+03 -.430E+02 0.115E-01 -.567E+01 -  
.241E+00 0.294E-06 0.463E-06 0.855E-06  
-.379E+01 -.150E+03 -.385E+02 0.379E+01 0.156E+03 0.385E+02 -.610E-02 -.566E+01  
0.239E-01 0.137E-06 0.647E-06 -.350E-06  
-.207E+01 -.151E+03 0.395E+02 0.207E+01 0.156E+03 -.392E+02 0.153E-02 -.566E+01 -  
.282E+00 0.555E-06 0.692E-06 0.674E-06  
-.444E-02 -.148E+03 0.486E+02 0.120E-01 0.154E+03 -.484E+02 -.551E-02 -.570E+01 -  
.158E+00 -.223E-06 0.316E-06 0.408E-06  
0.196E+02 -.103E+03 0.222E+02 -.212E+02 0.103E+03 -.246E+02 0.153E+01 0.138E+00  
0.238E+01 0.309E-06 0.868E-06 -.393E-06  
-.192E+02 -.103E+03 0.153E+02 0.216E+02 0.103E+03 -.168E+02 -.241E+01 -.119E+00

0.151E+01 - .127E-06 0.130E-05 -.800E-06  
0.717E-01 0.461E+03 0.202E+03 -.749E-01 -.462E+03 -.201E+03 0.384E-02 0.102E+01 -  
.219E+00 -.417E-06 -.169E-06 -.123E-05  
0.212E+00 0.353E+03 -.234E+03 -.212E+00 -.353E+03 0.234E+03 0.260E-02 0.443E+00 -  
.371E-01 0.875E-06 0.732E-07 0.306E-05  
-.243E-01 0.351E+03 0.240E+03 0.229E-01 -.351E+03 -.241E+03 0.316E-02 0.408E+00  
0.565E-01 -.106E-05 0.111E-05 -.181E-05  
-.173E+00 0.462E+03 -.195E+03 0.179E+00 -.463E+03 0.195E+03 -.662E-02 0.105E+01  
0.233E+00 0.219E-05 0.102E-05 0.216E-05  
-.622E-01 0.210E+03 -.272E+03 0.662E-01 -.210E+03 0.272E+03 -.448E-02 0.941E-01  
0.560E-01 0.321E-06 -.506E-06 0.205E-05  
0.562E+00 0.461E+03 0.202E+03 -.564E+00 -.462E+03 -.201E+03 0.201E-02 0.102E+01 -  
.214E+00 0.643E-06 -.800E-06 -.346E-06  
0.106E+01 0.352E+03 -.234E+03 -.107E+01 -.353E+03 0.234E+03 0.159E-01 0.449E+00 -  
.425E-01 -.120E-05 0.102E-06 0.184E-05  
0.413E+00 0.351E+03 0.240E+03 -.415E+00 -.351E+03 -.240E+03 0.303E-02 0.408E+00  
0.492E-01 0.655E-08 0.823E-06 0.128E-07  
0.578E+00 0.462E+03 -.195E+03 -.583E+00 -.463E+03 0.195E+03 0.478E-02 0.105E+01  
0.235E+00 -.154E-06 -.485E-06 0.281E-05  
0.689E+00 0.210E+03 -.272E+03 -.694E+00 -.210E+03 0.272E+03 0.604E-02 0.918E-01  
0.616E-01 -.631E-06 -.351E-06 0.120E-05  
0.425E+00 0.461E+03 0.202E+03 -.428E+00 -.462E+03 -.202E+03 0.383E-02 0.102E+01 -

.213E+00 0.136E-05 -.789E-06 -.216E-05  
0.938E+00 0.352E+03 -.233E+03 -.954E+00 -.352E+03 0.233E+03 0.151E-01 0.442E+00 -  
.377E-01 -.134E-05 0.217E-05 -.139E-05  
0.478E+00 0.351E+03 0.241E+03 -.480E+00 -.351E+03 -.241E+03 0.249E-02 0.406E+00  
0.513E-01 0.112E-05 0.592E-06 -.526E-06  
0.704E+00 0.462E+03 -.194E+03 -.715E+00 -.463E+03 0.194E+03 0.783E-02 0.106E+01  
0.242E+00 -.216E-05 0.109E-05 -.140E-06  
0.724E+00 0.210E+03 -.271E+03 -.733E+00 -.210E+03 0.271E+03 0.647E-02 0.916E-01  
0.592E-01 -.489E-06 0.102E-05 -.686E-06  
-.182E+00 0.461E+03 0.202E+03 0.178E+00 -.462E+03 -.202E+03 0.448E-02 0.102E+01 -  
.218E+00 0.539E-06 -.442E-06 -.489E-05  
-.294E+00 0.352E+03 -.233E+03 0.298E+00 -.352E+03 0.233E+03 -.209E-02 0.441E+00 -  
.300E-01 -.100E-05 0.402E-05 -.343E-05  
0.398E-01 0.351E+03 0.241E+03 -.387E-01 -.351E+03 -.241E+03 0.222E-02 0.409E+00  
0.559E-01 0.121E-05 0.452E-06 -.294E-05  
0.499E-01 0.462E+03 -.194E+03 -.560E-01 -.463E+03 0.194E+03 0.395E-02 0.106E+01  
0.232E+00 -.194E-05 0.386E-05 -.373E-05  
-.478E-01 0.210E+03 -.271E+03 0.458E-01 -.210E+03 0.271E+03 -.240E-03 0.938E-01  
0.324E-01 -.580E-06 0.234E-05 -.176E-05  
-.551E+00 0.461E+03 0.202E+03 0.549E+00 -.462E+03 -.202E+03 0.775E-03 0.102E+01 -  
.220E+00 -.827E-06 -.646E-08 -.580E-05  
-.119E+01 0.352E+03 -.233E+03 0.120E+01 -.353E+03 0.233E+03 -.162E-01 0.448E+00 -

.330E-01 0.102E-05 0.386E-05 -.222E-05  
-.353E+00 0.351E+03 0.241E+03 0.349E+00 -.351E+03 -.241E+03 0.207E-02 0.414E+00  
0.625E-01 -.939E-07 0.623E-06 -.485E-05  
-.411E+00 0.462E+03 -.194E+03 0.425E+00 -.463E+03 0.194E+03 -.115E-01 0.106E+01  
0.230E+00 0.422E-07 0.521E-05 -.428E-05  
-.560E+00 0.210E+03 -.271E+03 0.565E+00 -.210E+03 0.271E+03 -.935E-02 0.920E-01  
0.525E-01 0.602E-06 0.214E-05 -.883E-06  
-.474E+00 0.461E+03 0.202E+03 0.473E+00 -.462E+03 -.202E+03 0.308E-02 0.102E+01 -  
.220E+00 -.130E-05 0.172E-06 -.392E-05  
-.805E+00 0.353E+03 -.234E+03 0.819E+00 -.353E+03 0.234E+03 -.149E-01 0.448E+00 -  
.393E-01 0.161E-05 0.218E-05 0.971E-06  
-.373E+00 0.351E+03 0.241E+03 0.367E+00 -.351E+03 -.241E+03 0.979E-03 0.411E+00  
0.627E-01 -.117E-05 0.994E-06 -.428E-05  
-.594E+00 0.462E+03 -.194E+03 0.607E+00 -.463E+03 0.194E+03 -.170E-01 0.105E+01  
0.234E+00 0.211E-05 0.393E-05 -.152E-05  
-.587E+00 0.210E+03 -.272E+03 0.598E+00 -.210E+03 0.272E+03 -.102E-01 0.997E-01  
0.567E-01 0.763E-06 0.853E-06 0.967E-06  
-.805E-02 0.206E+03 0.279E+03 0.114E-01 -.206E+03 -.279E+03 -.360E-02 0.689E-01 -  
.411E-01 -.968E-06 0.136E-05 -.746E-06  
0.669E+00 0.303E+02 0.296E+03 -.664E+00 -.302E+02 -.296E+03 -.468E-02 -.408E-01  
0.768E-02 -.252E-06 0.153E-05 -.618E-06  
-.845E+00 0.144E+03 -.282E+03 0.847E+00 -.144E+03 0.282E+03 -.319E-02 0.137E+00

0.286E-01 0.194E-06 -.159E-06 0.109E-05  
0.534E+00 -.215E+02 -.285E+03 -.534E+00 0.214E+02 0.285E+03 -.791E-03 0.391E-01  
0.185E-01 -.227E-06 -.538E-06 -.114E-05  
0.502E+00 -.294E+02 0.293E+03 -.499E+00 0.294E+02 -.293E+03 -.553E-02 0.255E-01 -  
.302E-01 0.229E-06 0.739E-06 -.769E-06  
0.525E+00 0.139E+03 0.289E+03 -.525E+00 -.139E+03 -.289E+03 0.179E-02 0.104E+00 -  
.247E-01 -.573E-06 0.161E-05 0.456E-08  
-.126E+01 0.364E+02 -.287E+03 0.126E+01 -.364E+02 0.287E+03 0.239E-04 -.703E-02  
0.138E-01 -.251E-06 -.494E-06 -.413E-06  
0.167E+01 -.130E+03 -.271E+03 -.169E+01 0.130E+03 0.271E+03 0.106E-01 -.875E-01  
0.371E-01 -.311E-06 -.450E-06 -.185E-05  
0.397E+00 0.207E+03 0.280E+03 -.395E+00 -.207E+03 -.280E+03 0.703E-03 0.697E-01 -  
.369E-01 -.230E-06 0.160E-05 0.471E-06  
0.919E+00 0.312E+02 0.296E+03 -.922E+00 -.311E+02 -.296E+03 0.223E-02 -.409E-01  
0.124E-01 -.945E-07 0.154E-05 -.350E-06  
0.133E+01 0.144E+03 -.282E+03 -.133E+01 -.144E+03 0.282E+03 0.502E-02 0.127E+00  
0.279E-01 -.195E-06 -.699E-06 0.109E-05  
0.341E+01 -.199E+02 -.285E+03 -.343E+01 0.199E+02 0.285E+03 0.134E-01 0.418E-01  
0.134E-01 0.228E-06 -.710E-06 -.879E-06  
0.139E+01 -.287E+02 0.294E+03 -.139E+01 0.287E+02 -.294E+03 -.349E-02 0.254E-01 -  
.306E-01 -.192E-06 0.143E-05 -.108E-05  
0.677E+00 0.139E+03 0.290E+03 -.678E+00 -.139E+03 -.290E+03 0.605E-03 0.103E+00 -

.294E-01 0.315E-06 0.160E-05 0.412E-06  
0.160E+01 0.367E+02 -.287E+03 -.159E+01 -.366E+02 0.287E+03 -.129E-01 -.200E-01  
0.128E-01 -.115E-06 -.771E-06 -.517E-06  
0.611E+01 -.125E+03 -.271E+03 -.613E+01 0.125E+03 0.271E+03 0.219E-01 -.889E-01  
0.146E-01 0.181E-06 -.594E-06 -.103E-05  
0.366E+00 0.207E+03 0.280E+03 -.371E+00 -.207E+03 -.280E+03 0.925E-04 0.686E-01 -  
.364E-01 0.983E-06 0.117E-05 0.149E-06  
-.401E-01 0.319E+02 0.296E+03 0.314E-01 -.318E+02 -.296E+03 0.105E-01 -.361E-01  
0.140E-01 0.173E-06 0.275E-06 0.713E-07  
0.210E+01 0.144E+03 -.281E+03 -.211E+01 -.144E+03 0.281E+03 0.121E-01 0.121E+00  
0.239E-01 -.337E-06 0.239E-06 0.684E-09  
0.303E+01 -.172E+02 -.283E+03 -.305E+01 0.171E+02 0.283E+03 0.246E-01 0.885E-01  
0.601E-01 0.229E-06 -.543E-06 -.578E-06  
0.105E+01 -.272E+02 0.294E+03 -.105E+01 0.272E+02 -.294E+03 0.287E-02 0.244E-01 -  
.374E-01 -.379E-06 0.736E-06 -.387E-06  
0.952E-01 0.140E+03 0.290E+03 -.968E-01 -.140E+03 -.290E+03 0.129E-02 0.107E+00 -  
.230E-01 0.890E-06 0.626E-06 -.273E-06  
0.276E+01 0.387E+02 -.286E+03 -.277E+01 -.387E+02 0.286E+03 0.129E-02 -.102E-01  
0.290E-01 0.148E-06 -.384E-06 -.562E-06  
0.594E+01 -.115E+03 -.267E+03 -.610E+01 0.115E+03 0.267E+03 0.155E+00 0.364E-02  
0.129E+00 0.305E-06 -.493E-06 -.437E-06  
-.243E+00 0.207E+03 0.280E+03 0.241E+00 -.207E+03 -.280E+03 0.437E-02 0.719E-01 -

.385E-01 0.111E-05 0.354E-06 -.147E-05  
-.115E+01 0.314E+02 0.294E+03 0.114E+01 -.314E+02 -.294E+03 0.918E-02 -.310E-01  
0.560E-02 0.196E-06 -.872E-06 0.147E-06  
0.594E+00 0.144E+03 -.281E+03 -.611E+00 -.144E+03 0.281E+03 0.177E-01 0.126E+00  
0.437E-01 -.117E-06 0.110E-05 -.111E-05  
-.940E+00 -.159E+02 -.286E+03 0.932E+00 0.158E+02 0.285E+03 0.597E-02 0.916E-01  
0.799E-01 0.322E-07 -.703E-06 -.580E-06  
-.647E+00 -.265E+02 0.293E+03 0.643E+00 0.265E+02 -.293E+03 0.491E-02 0.235E-01 -  
.269E-01 -.119E-06 -.739E-06 0.590E-06  
-.535E+00 0.139E+03 0.289E+03 0.531E+00 -.139E+03 -.289E+03 0.655E-02 0.114E+00 -  
.212E-01 0.521E-06 -.259E-06 -.141E-05  
0.776E+00 0.408E+02 -.287E+03 -.788E+00 -.408E+02 0.287E+03 0.504E-02 0.255E-02 -  
.192E-01 0.343E-06 0.181E-06 -.706E-06  
-.461E+00 -.113E+03 -.276E+03 0.427E+00 0.113E+03 0.276E+03 0.347E-01 0.615E-01 -  
.269E+00 -.156E-06 0.164E-05 -.793E-06  
-.572E+00 0.206E+03 0.279E+03 0.570E+00 -.206E+03 -.279E+03 0.115E-02 0.723E-01 -  
.454E-01 0.311E-07 -.255E-07 -.276E-05  
-.782E+00 0.304E+02 0.294E+03 0.786E+00 -.304E+02 -.294E+03 -.753E-02 -.307E-01 -  
.122E-02 0.853E-07 -.795E-06 -.156E-06  
-.123E+01 0.144E+03 -.281E+03 0.124E+01 -.145E+03 0.281E+03 -.156E-01 0.123E+00  
0.504E-01 -.125E-06 0.165E-05 -.114E-05  
-.365E+01 -.174E+02 -.283E+03 0.369E+01 0.173E+02 0.283E+03 -.310E-01 0.118E+00

0.580E-01 0.101E-06 -.411E-06 -.638E-06  
-.130E+01 -.277E+02 0.291E+03 0.129E+01 0.277E+02 -.291E+03 -.131E-02 0.342E-01 -  
.217E-01 0.821E-07 -.123E-05 0.880E-06  
-.347E+00 0.139E+03 0.289E+03 0.346E+00 -.139E+03 -.289E+03 0.211E-04 0.112E+00 -  
.145E-01 -.276E-06 -.261E-06 -.187E-05  
-.828E+00 0.400E+02 -.287E+03 0.820E+00 -.400E+02 0.287E+03 0.126E-01 -.703E-02 -  
.184E-01 -.312E-06 0.474E-06 -.719E-06  
-.785E+01 -.119E+03 -.267E+03 0.804E+01 0.119E+03 0.267E+03 -.191E+00 0.510E-02  
0.338E-01 0.195E-06 -.549E-06 -.760E-06  
-.408E+00 0.206E+03 0.279E+03 0.410E+00 -.206E+03 -.279E+03 -.279E-02 0.718E-01 -  
.463E-01 -.919E-06 0.515E-06 -.242E-05  
-.609E-01 0.300E+02 0.294E+03 0.706E-01 -.299E+02 -.294E+03 -.947E-02 -.346E-01  
0.138E-02 -.143E-06 0.351E-06 -.508E-06  
-.206E+01 0.145E+03 -.282E+03 0.208E+01 -.145E+03 0.282E+03 -.190E-01 0.133E+00  
0.256E-01 0.646E-06 0.124E-05 -.131E-07  
-.256E+01 -.208E+02 -.285E+03 0.259E+01 0.208E+02 0.285E+03 -.290E-01 0.413E-01  
0.317E-01 -.432E-06 -.374E-06 -.835E-06  
-.549E+00 -.290E+02 0.291E+03 0.554E+00 0.290E+02 -.291E+03 -.284E-02 0.293E-01 -  
.249E-01 0.385E-06 -.543E-06 0.167E-06  
0.602E-01 0.139E+03 0.289E+03 -.603E-01 -.139E+03 -.289E+03 -.327E-03 0.109E+00 -  
.207E-01 -.899E-06 0.745E-06 -.115E-05  
-.289E+01 0.378E+02 -.286E+03 0.291E+01 -.377E+02 0.286E+03 -.148E-01 -.306E-02

0.208E-01 0.271E-06 -.637E-07 -.481E-06  
-.513E+01 -.128E+03 -.271E+03 0.518E+01 0.128E+03 0.271E+03 -.464E-01 -.858E-01

0.375E-01 -.312E-06 -.490E-06 -.121E-05  
0.405E+00 -.137E+03 0.280E+03 -.397E+00 0.137E+03 -.280E+03 -.968E-02 -.127E+00 -

.154E-01 0.806E-06 0.303E-06 -.107E-05  
0.194E+01 -.343E+03 0.233E+03 -.195E+01 0.344E+03 -.233E+03 0.913E-02 -.460E+00 -

.543E-01 0.429E-06 0.472E-06 -.256E-05  
-.252E+01 -.197E+03 -.259E+03 0.253E+01 0.197E+03 0.259E+03 -.954E-02 -.197E+00

0.367E-01 -.410E-06 0.151E-06 -.161E-05  
0.691E+01 -.447E+03 -.198E+03 -.693E+01 0.448E+03 0.198E+03 0.965E-02 -.112E+01

0.875E-01 -.111E-05 -.176E-06 -.965E-06  
-.451E+00 -.451E+03 0.204E+03 0.452E+00 0.452E+03 -.204E+03 -.201E-02 -.108E+01 -

.112E+00 0.119E-05 0.167E-05 -.931E-06  
0.172E+01 -.203E+03 0.269E+03 -.171E+01 0.203E+03 -.269E+03 -.480E-02 -.925E-01 -

.317E-01 0.489E-06 0.538E-06 -.222E-05  
-.210E+01 -.338E+03 -.222E+03 0.214E+01 0.338E+03 0.222E+03 -.444E-01 -.604E+00

0.536E-01 -.212E-06 0.638E-06 -.107E-05  
0.219E+01 -.136E+03 0.282E+03 -.218E+01 0.136E+03 -.282E+03 -.638E-02 -.126E+00 -

.920E-02 -.246E-06 0.811E-06 -.220E-05  
0.671E+01 -.339E+03 0.238E+03 -.670E+01 0.340E+03 -.238E+03 -.128E-01 -.461E+00 -

.456E-01 -.143E-05 -.156E-06 -.299E-05  
0.678E+01 -.193E+03 -.258E+03 -.679E+01 0.193E+03 0.258E+03 0.112E-01 -.145E+00

0.633E-01    -.298E-06 -.538E-07 -.146E-05  
                  0.312E+02 -.427E+03 -.198E+03    -.313E+02 0.428E+03 0.197E+03    0.725E-01 -.972E+00  
0.135E+00    -.235E-06 -.920E-06 0.818E-07  
                  0.544E+01 -.449E+03 0.209E+03    -.545E+01 0.450E+03 -.209E+03    0.549E-03 -.108E+01 -  
.795E-01    -.822E-06 0.825E-06 -.341E-05  
                  0.368E+01 -.201E+03 0.272E+03    -.368E+01 0.201E+03 -.272E+03    -.771E-03 -.975E-01 -  
.303E-01    -.962E-06 0.232E-06 -.230E-05  
                  0.124E+02 -.332E+03 -.223E+03    -.125E+02 0.332E+03 0.223E+03    0.121E+00 -.534E+00  
0.313E-01    -.896E-06 -.313E-06 -.761E-06  
                  0.219E+01 -.133E+03 0.283E+03    -.219E+01 0.133E+03 -.283E+03    0.506E-03 -.128E+00 -  
.421E-02    -.102E-05 0.776E-07 -.976E-06  
                  0.491E+01 -.332E+03 0.245E+03    -.488E+01 0.332E+03 -.245E+03    -.320E-01 -.476E+00 -  
.372E-01    -.154E-05 -.785E-06 0.211E-06  
                  0.112E+02 -.182E+03 -.258E+03    -.113E+02 0.182E+03 0.258E+03    0.475E-01 -.991E-01 -  
.104E+00    0.399E-06 -.664E-06 -.479E-06  
                  0.317E+02 -.399E+03 -.175E+03    -.320E+02 0.401E+03 0.174E+03    0.300E+00 -.143E+01  
0.131E+01    -.119E-05 -.232E-05 -.263E-05  
                  0.929E+01 -.443E+03 0.219E+03    -.929E+01 0.444E+03 -.219E+03    -.578E-02 -.110E+01 -  
.483E-01    -.203E-05 -.827E-07 -.203E-05  
                  0.168E+01 -.196E+03 0.273E+03    -.169E+01 0.197E+03 -.273E+03    0.549E-02 -.109E+00 -  
.508E-01    -.136E-05 -.812E-06 0.249E-06  
                  0.172E+02 -.310E+03 -.216E+03    -.175E+02 0.310E+03 0.216E+03    0.326E+00 -.219E+00

0.122E+00 0.105E-05 -.862E-07 -.595E-06  
-.104E+01 -.132E+03 0.281E+03 0.103E+01 0.132E+03 -.281E+03 0.103E-01 -.127E+00  
0.383E-03 -.770E-06 -.103E-05 0.138E-05  
-.513E+01 -.332E+03 0.239E+03 0.513E+01 0.332E+03 -.239E+03 0.890E-02 -.494E+00 -  
.415E-01 -.323E-06 -.816E-06 0.355E-05  
0.156E+01 -.170E+03 -.261E+03 -.168E+01 0.169E+03 0.261E+03 0.119E+00 0.379E+00 -  
.888E-01 0.206E-05 0.196E-05 -.106E-05  
-.657E+01 -.302E+03 -.189E+03 0.610E+01 0.297E+03 0.185E+03 0.477E+00 0.506E+01  
0.395E+01 0.359E-06 -.828E-05 -.409E-05  
-.642E+00 -.436E+03 0.227E+03 0.639E+00 0.437E+03 -.227E+03 0.171E-02 -.120E+01 -  
.478E-01 -.114E-05 -.319E-06 0.208E-05  
-.303E+01 -.197E+03 0.268E+03 0.302E+01 0.197E+03 -.268E+03 0.146E-01 -.112E+00 -  
.426E-01 -.316E-06 -.145E-05 0.282E-05  
0.325E+01 -.281E+03 -.215E+03 -.518E+01 0.280E+03 0.214E+03 0.192E+01 0.647E+00  
0.817E+00 0.168E-05 -.498E-05 -.333E-05  
-.274E+01 -.134E+03 0.277E+03 0.274E+01 0.134E+03 -.277E+03 0.249E-02 -.123E+00 -  
.183E-01 0.155E-06 -.147E-05 0.251E-05  
-.600E+01 -.338E+03 0.230E+03 0.599E+01 0.339E+03 -.230E+03 0.113E-01 -.494E+00 -  
.456E-01 0.101E-05 -.277E-06 0.362E-05  
-.649E+01 -.171E+03 -.257E+03 0.656E+01 0.170E+03 0.257E+03 -.789E-01 0.491E+00  
0.229E-01 -.191E-05 0.181E-05 -.140E-05  
-.441E+02 -.422E+03 -.184E+03 0.447E+02 0.424E+03 0.183E+03 -.563E+00 -.111E+01

0.624E+00 0.185E-05 -.828E-06 -.303E-05  
-.868E+01 -.441E+03 0.211E+03 0.867E+01 0.443E+03 -.211E+03 0.144E-01 -.112E+01 -  
.748E-01 0.649E-06 0.280E-06 0.398E-05  
-.292E+01 -.201E+03 0.265E+03 0.293E+01 0.201E+03 -.265E+03 -.915E-02 -.110E+00 -  
.201E-01 0.806E-06 -.127E-05 0.275E-05  
-.144E+02 -.290E+03 -.209E+03 0.164E+02 0.289E+03 0.208E+03 -.198E+01 0.607E+00  
0.782E+00 -.189E-05 -.398E-05 -.392E-05  
-.138E+01 -.136E+03 0.277E+03 0.139E+01 0.136E+03 -.277E+03 -.102E-01 -.125E+00 -  
.237E-01 0.102E-05 -.852E-06 0.116E-05  
-.278E+01 -.343E+03 0.230E+03 0.275E+01 0.343E+03 -.230E+03 0.235E-01 -.473E+00 -  
.589E-01 0.176E-05 0.444E-06 0.662E-06  
-.104E+02 -.189E+03 -.258E+03 0.104E+02 0.189E+03 0.258E+03 -.774E-01 -.139E+00 -  
.530E-01 0.240E-06 -.324E-06 -.923E-06  
-.149E+02 -.446E+03 -.196E+03 0.150E+02 0.447E+03 0.196E+03 -.695E-01 -.113E+01  
0.101E+00 0.342E-06 0.817E-06 -.852E-06  
-.547E+01 -.448E+03 0.204E+03 0.548E+01 0.449E+03 -.203E+03 -.481E-02 -.109E+01 -  
.125E+00 0.196E-05 0.158E-05 0.259E-05  
-.904E+00 -.203E+03 0.267E+03 0.912E+00 0.203E+03 -.267E+03 -.909E-02 -.102E+00 -  
.314E-01 0.131E-05 -.300E-06 0.185E-06  
-.163E+02 -.329E+03 -.218E+03 0.166E+02 0.329E+03 0.218E+03 -.360E+00 -.480E+00  
0.430E-01 0.831E-07 0.465E-06 -.134E-05  
-.378E+01 -.260E+03 -.193E+03 0.287E+01 0.253E+03 0.189E+03 0.969E+00 0.771E+01

0.500E+01 0.233E-05 0.152E-04 0.667E-05  
 0.528E+02 -.518E+03 -.137E+03 -.539E+02 0.522E+03 0.141E+03 0.106E+01 -.396E+01 -  
 .382E+01 -.104E-05 0.475E-05 -.208E-05  
 -.460E+02 -.581E+03 -.447E+03 0.517E+02 0.630E+03 0.481E+03 -.576E+01 -.501E+02 -  
 .345E+02 0.303E-05 0.313E-05 -.964E-05  
 -----  
 0.426E+01 0.270E+02 0.226E+02 -.256E-12 -.227E-12 0.182E-11 -.430E+01 -.270E+02 -  
 .226E+02 0.409E-05 0.540E-04 -.104E-03

| POSITION | TOTAL-FORCE (eV/Angst) |         |           |           |           |  |
|----------|------------------------|---------|-----------|-----------|-----------|--|
| 1.24575  | 4.02870                | 5.43979 | 0.000042  | 0.001038  | -0.000406 |  |
| 1.21024  | 4.07581                | 8.43726 | -0.000988 | 0.002654  | -0.001084 |  |
| 3.70862  | 4.02890                | 5.43965 | 0.000311  | 0.001910  | -0.001092 |  |
| 3.67998  | 4.07733                | 8.43690 | -0.004029 | -0.000377 | -0.002843 |  |
| 6.17157  | 4.02854                | 5.43942 | -0.000002 | -0.000118 | -0.001747 |  |
| 6.14482  | 4.08292                | 8.43295 | -0.002826 | -0.003260 | -0.003126 |  |
| 8.63513  | 4.02801                | 5.43869 | 0.000782  | -0.000421 | -0.001996 |  |
| 8.60339  | 4.08732                | 8.43089 | -0.000128 | -0.001139 | -0.002136 |  |
| 11.09928 | 4.02784                | 5.43885 | 0.000875  | 0.001994  | -0.002705 |  |
| 11.06021 | 4.08619                | 8.43099 | -0.001744 | 0.000742  | -0.000566 |  |

|          |          |         |           |           |           |
|----------|----------|---------|-----------|-----------|-----------|
| 13.56311 | 4.02807  | 5.43972 | 0.000331  | 0.001642  | -0.001613 |
| 13.52141 | 4.08047  | 8.43349 | 0.000398  | -0.002213 | 0.000363  |
| 2.44241  | 15.48073 | 8.85224 | -0.000618 | -0.005349 | 0.002417  |
| 0.01714  | 15.44624 | 5.32469 | 0.000336  | 0.001520  | -0.001206 |
| 4.86040  | 15.47728 | 8.86623 | 0.001317  | 0.000074  | -0.000238 |
| 2.48016  | 15.44854 | 5.27562 | 0.000370  | -0.001216 | -0.000526 |
| 4.94382  | 15.44925 | 5.24869 | 0.001821  | -0.003061 | 0.000368  |
| 12.31531 | 15.48242 | 9.00211 | -0.005930 | 0.001144  | 0.003558  |
| 9.86772  | 15.44556 | 5.34176 | 0.000429  | -0.001152 | 0.000930  |
| 14.76279 | 15.48245 | 8.89951 | -0.006240 | -0.000606 | 0.005662  |
| 12.33384 | 15.44510 | 5.36128 | 0.001345  | -0.003247 | -0.001267 |
| 7.40743  | 15.44616 | 5.26463 | 0.002349  | 0.001457  | 0.001436  |
| 6.44846  | 16.34427 | 7.40648 | -0.003873 | -0.002024 | 0.000195  |
| 8.60064  | 16.47644 | 7.89249 | 0.004852  | 0.002679  | 0.006040  |
| 1.24544  | 5.11881  | 5.35500 | 0.000944  | 0.000065  | -0.002392 |
| 2.44348  | 5.83889  | 8.62292 | 0.002422  | -0.004404 | 0.001247  |
| 0.01380  | 5.79530  | 5.28573 | 0.002081  | -0.002386 | 0.000491  |
| 1.21063  | 5.16420  | 8.54151 | 0.000274  | -0.000510 | -0.001919 |
| 2.44351  | 7.27931  | 8.74832 | -0.000067 | -0.001273 | -0.000104 |
| 3.70866  | 5.11896  | 5.35390 | -0.000426 | -0.001723 | 0.000398  |
| 4.90800  | 5.84315  | 8.62123 | -0.001055 | 0.003834  | -0.000706 |
| 2.47701  | 5.79561  | 5.28397 | 0.001455  | -0.000536 | -0.002589 |

|          |         |         |           |           |           |
|----------|---------|---------|-----------|-----------|-----------|
| 3.67679  | 5.16572 | 8.54000 | -0.000129 | 0.001649  | -0.000064 |
| 4.90764  | 7.28398 | 8.74777 | 0.000663  | -0.000628 | 0.001025  |
| 6.17184  | 5.11860 | 5.35433 | 0.001474  | 0.000286  | 0.000962  |
| 7.37096  | 5.84929 | 8.62094 | -0.000643 | 0.007121  | -0.002425 |
| 4.94029  | 5.79548 | 5.28340 | 0.000611  | -0.002620 | -0.001155 |
| 6.14080  | 5.17108 | 8.53715 | -0.002512 | 0.002511  | 0.002436  |
| 7.37071  | 7.28983 | 8.75132 | -0.002038 | 0.001556  | 0.000150  |
| 8.63543  | 5.11820 | 5.35521 | 0.001237  | 0.001234  | -0.000998 |
| 9.83233  | 5.85166 | 8.62337 | 0.002798  | 0.000802  | -0.001074 |
| 7.40374  | 5.79498 | 5.28512 | 0.003470  | -0.002611 | -0.001317 |
| 8.60194  | 5.17528 | 8.53759 | -0.001878 | -0.000480 | -0.000249 |
| 9.83204  | 7.29110 | 8.75719 | -0.001806 | -0.002740 | -0.002421 |
| 11.09930 | 5.11814 | 5.35578 | -0.000871 | -0.003462 | -0.001292 |
| 12.29449 | 5.84673 | 8.62385 | 0.000028  | 0.005783  | -0.002174 |
| 9.86750  | 5.79468 | 5.28678 | -0.000741 | -0.000641 | 0.001573  |
| 11.06261 | 5.17409 | 8.53894 | 0.002652  | 0.002627  | -0.000435 |
| 12.29428 | 7.28729 | 8.75533 | -0.004481 | 0.001129  | -0.001508 |
| 13.56278 | 5.11829 | 5.35605 | 0.002655  | 0.000429  | -0.001917 |
| 14.75895 | 5.83988 | 8.62434 | -0.000271 | -0.002647 | -0.002146 |
| 12.33118 | 5.79480 | 5.28692 | -0.004503 | -0.001391 | 0.002615  |
| 13.52535 | 5.16844 | 8.54022 | -0.003478 | 0.003763  | -0.001457 |
| 14.75917 | 7.28012 | 8.75179 | 0.000992  | 0.002524  | -0.000702 |

|         |          |         |           |           |           |
|---------|----------|---------|-----------|-----------|-----------|
| 0.01434 | 7.23830  | 5.19017 | 0.000079  | -0.000221 | 0.000108  |
| 1.24689 | 9.38061  | 5.13160 | 0.000549  | -0.001881 | 0.000030  |
| 1.21085 | 7.98059  | 8.79588 | -0.000921 | -0.000468 | 0.001584  |
| 2.44214 | 10.12243 | 8.87141 | -0.000881 | 0.003580  | -0.004996 |
| 0.01532 | 10.08686 | 5.14049 | -0.002038 | -0.000131 | -0.002373 |
| 1.24606 | 7.94244  | 5.15775 | 0.002016  | -0.002596 | 0.000852  |
| 1.21082 | 9.41592  | 8.85782 | -0.000818 | 0.004255  | 0.000207  |
| 2.44072 | 11.55513 | 8.88414 | -0.006083 | -0.003086 | 0.001638  |
| 2.47747 | 7.23842  | 5.18585 | 0.002792  | 0.002863  | 0.001341  |
| 3.70997 | 9.38055  | 5.12566 | -0.001093 | -0.003033 | 0.000076  |
| 3.67534 | 7.98360  | 8.79349 | -0.000602 | 0.001066  | 0.000987  |
| 4.90487 | 10.12925 | 8.87518 | 0.000224  | -0.000038 | 0.000095  |
| 2.47867 | 10.08713 | 5.12695 | -0.002262 | 0.001496  | 0.000790  |
| 3.70939 | 7.94242  | 5.15441 | 0.000833  | -0.004006 | -0.001676 |
| 3.67589 | 9.41970  | 8.85445 | -0.001419 | 0.001815  | -0.000137 |
| 4.90263 | 11.56506 | 8.89086 | -0.000220 | 0.000986  | 0.000954  |
| 4.94085 | 7.23830  | 5.18552 | -0.004708 | 0.002237  | 0.000859  |
| 6.17318 | 9.38002  | 5.13173 | 0.002006  | 0.002063  | 0.001863  |
| 6.13864 | 7.99044  | 8.79647 | 0.002528  | -0.000204 | -0.001673 |
| 7.36780 | 10.13760 | 8.89473 | -0.000359 | 0.003394  | 0.000521  |
| 4.94196 | 10.08682 | 5.12700 | 0.004149  | 0.001481  | -0.001131 |
| 6.17284 | 7.94199  | 5.15766 | -0.000045 | 0.000564  | 0.003056  |

|          |          |         |           |           |           |
|----------|----------|---------|-----------|-----------|-----------|
| 6.13939  | 9.42660  | 8.86164 | 0.000774  | -0.000354 | -0.002254 |
| 7.36410  | 11.57721 | 8.92935 | -0.001507 | -0.001768 | 0.004493  |
| 7.40426  | 7.23794  | 5.19012 | 0.002137  | 0.001745  | 0.001108  |
| 8.63700  | 9.37970  | 5.14543 | -0.000553 | 0.002917  | 0.000986  |
| 8.60086  | 7.99568  | 8.80617 | 0.001137  | -0.000328 | -0.000962 |
| 9.83068  | 10.14286 | 8.92842 | -0.002238 | 0.002991  | -0.000972 |
| 7.40553  | 10.08627 | 5.14064 | 0.001228  | -0.003555 | 0.003168  |
| 8.63637  | 7.94166  | 5.16555 | 0.002619  | 0.001798  | -0.001382 |
| 8.60077  | 9.43254  | 8.88532 | -0.005993 | 0.002095  | -0.001233 |
| 9.82927  | 11.58244 | 9.00096 | 0.001122  | 0.002105  | 0.000597  |
| 9.86805  | 7.23787  | 5.19489 | -0.000373 | 0.000087  | -0.000180 |
| 11.10106 | 9.37979  | 5.15156 | -0.003834 | -0.001060 | 0.000697  |
| 11.06331 | 7.99411  | 8.80818 | -0.000338 | -0.001438 | 0.000224  |
| 12.29815 | 10.12943 | 8.90340 | -0.001123 | -0.000891 | 0.001279  |
| 9.86930  | 10.08593 | 5.15631 | -0.005442 | -0.001442 | 0.001433  |
| 11.10021 | 7.94175  | 5.16862 | -0.000589 | -0.003066 | 0.001415  |
| 11.06206 | 9.43062  | 8.88839 | 0.004577  | 0.001593  | 0.002108  |
| 12.30255 | 11.56557 | 8.94694 | 0.003994  | -0.000634 | 0.000289  |
| 12.33169 | 7.23799  | 5.19447 | -0.001034 | 0.000229  | -0.001719 |
| 13.56437 | 9.38021  | 5.14435 | 0.000735  | 0.001622  | -0.000544 |
| 13.52754 | 7.98555  | 8.80171 | -0.000796 | -0.002456 | -0.003107 |
| 14.76233 | 10.12320 | 8.88285 | -0.005198 | 0.001111  | -0.001575 |

|          |          |         |           |           |           |
|----------|----------|---------|-----------|-----------|-----------|
| 12.33257 | 10.08637 | 5.15511 | 0.002642  | 0.000550  | -0.001515 |
| 13.56350 | 7.94214  | 5.16485 | -0.000077 | -0.000889 | -0.000348 |
| 13.52731 | 9.42040  | 8.86925 | -0.000131 | 0.003171  | -0.000635 |
| 14.76430 | 11.55727 | 8.90646 | -0.002300 | -0.001099 | 0.001668  |
| 0.01611  | 11.52516 | 5.16621 | -0.001079 | -0.002602 | 0.000421  |
| 1.24770  | 13.67535 | 5.22209 | 0.001809  | -0.002531 | -0.002466 |
| 1.21217  | 12.26335 | 8.89409 | 0.000489  | -0.000177 | 0.001245  |
| 2.43998  | 14.38728 | 8.86748 | -0.002703 | 0.001790  | 0.000834  |
| 0.01699  | 14.35408 | 5.27295 | -0.000405 | -0.000409 | -0.001914 |
| 1.24794  | 12.22963 | 5.17275 | 0.001067  | 0.000825  | -0.001339 |
| 1.21434  | 13.70818 | 8.88771 | 0.002454  | 0.001379  | 0.003900  |
| 2.47958  | 11.52580 | 5.14547 | -0.001612 | -0.000231 | -0.001447 |
| 3.71218  | 13.67636 | 5.19535 | 0.004718  | 0.000353  | 0.001060  |
| 3.66932  | 12.26248 | 8.88184 | -0.002101 | 0.000149  | -0.000587 |
| 4.89370  | 14.38589 | 8.86075 | 0.004611  | -0.000078 | -0.002615 |
| 2.48000  | 14.35596 | 5.23149 | 0.001279  | -0.000925 | 0.001742  |
| 3.71150  | 12.23022 | 5.15602 | 0.000906  | -0.004571 | 0.001037  |
| 3.66212  | 13.70366 | 8.87117 | -0.005459 | 0.003161  | -0.000483 |
| 4.94290  | 11.52542 | 5.14351 | -0.000082 | -0.001821 | -0.001573 |
| 6.17627  | 13.67505 | 5.20032 | 0.000833  | 0.000302  | 0.000058  |
| 6.13145  | 12.27911 | 8.90591 | 0.005283  | 0.006493  | 0.004749  |
| 7.36614  | 14.42967 | 8.88203 | 0.001889  | 0.002006  | 0.001017  |

|          |          |         |           |           |           |
|----------|----------|---------|-----------|-----------|-----------|
| 4.94347  | 14.35627 | 5.21375 | 0.000058  | -0.001628 | 0.001036  |
| 6.17493  | 12.22917 | 5.16623 | -0.001432 | -0.001037 | 0.001593  |
| 6.11879  | 13.72336 | 8.87765 | 0.005322  | -0.000938 | -0.000933 |
| 7.40625  | 11.52413 | 5.16368 | 0.000899  | -0.003427 | 0.000384  |
| 8.63876  | 13.67323 | 5.24377 | 0.001799  | 0.001762  | -0.001320 |
| 8.58939  | 12.29067 | 9.00208 | 0.003018  | 0.001315  | 0.000437  |
| 9.83855  | 14.39048 | 9.30305 | 0.010542  | 0.023828  | 0.011970  |
| 7.40672  | 14.35386 | 5.23530 | -0.001151 | 0.000085  | -0.000729 |
| 8.63820  | 12.22778 | 5.19800 | 0.000322  | -0.001253 | 0.001098  |
| 8.55571  | 13.73596 | 9.04598 | -0.006941 | -0.005033 | -0.004440 |
| 9.86985  | 11.52338 | 5.18893 | 0.001736  | -0.002047 | -0.000080 |
| 11.10099 | 13.67352 | 5.27669 | 0.003244  | -0.001170 | -0.000965 |
| 11.07378 | 12.27333 | 9.00891 | -0.006340 | 0.004426  | -0.001442 |
| 12.30694 | 14.38896 | 9.00333 | -0.002357 | 0.001734  | 0.001819  |
| 9.86934  | 14.35300 | 5.29564 | 0.002897  | 0.000388  | 0.000110  |
| 11.10161 | 12.22804 | 5.21650 | -0.001101 | -0.002726 | 0.001082  |
| 11.11464 | 13.70636 | 9.07877 | 0.008449  | -0.001120 | -0.007297 |
| 12.33326 | 11.52411 | 5.18815 | -0.000922 | 0.000226  | 0.000562  |
| 13.56430 | 13.67399 | 5.25995 | 0.001525  | -0.000267 | 0.000094  |
| 13.53626 | 12.26601 | 8.93587 | -0.002328 | 0.004320  | 0.002312  |
| 14.76266 | 14.38906 | 8.90426 | -0.004719 | 0.002418  | 0.003508  |
| 12.33397 | 14.35288 | 5.30710 | 0.002803  | -0.001564 | -0.001706 |

|          |          |          |           |           |           |
|----------|----------|----------|-----------|-----------|-----------|
| 13.56505 | 12.22870 | 5.20105  | 0.000125  | 0.000077  | -0.001114 |
| 13.54921 | 13.70690 | 8.94399  | 0.000062  | -0.005679 | 0.001233  |
| 9.91126  | 15.53185 | 9.99472  | 0.067955  | 0.586669  | 0.455603  |
| 7.28864  | 16.40884 | 8.69813  | 0.003703  | -0.002215 | 0.001549  |
| 10.02526 | 16.50365 | 10.65998 | -0.070271 | -0.613357 | -0.454288 |

-----

|              |  |  |           |          |           |
|--------------|--|--|-----------|----------|-----------|
| total drift: |  |  | -0.044688 | 0.025694 | -0.026853 |
|--------------|--|--|-----------|----------|-----------|

-----

FREE ENERGIE OF THE ION-ELECTRON SYSTEM (eV)

-----

free energy TOTEN = -1209.38584555 eV

energy without entropy= -1209.38584555 energy(sigma->0) = -1209.38584555

d Force = 0.4547907E-02[-0.160E-01, 0.251E-01] d Energy = 0.4043418E-02 0.504E-03

d Force = 0.1679345E+02[ 0.167E+02, 0.169E+02] d Ewald = 0.1679265E+02 0.800E-03

---

POTLOK:  cpu time     0.1764: real time     0.1768

---

stress matrix after NEB project (eV)

|           |           |           |
|-----------|-----------|-----------|
| -17.77497 | -0.32523  | 0.00209   |
| -0.32523  | -15.90815 | 0.03276   |
| 0.00209   | 0.03276   | -19.34745 |

FORCES: max atom, RMS     0.766500     0.088213

FORCE total and by dimension     1.069530     0.613357

Stress total and by dimension     30.717366     19.347454

Finite differences progress:

Degree of freedom:     6/  6

Displacement:             1/  2

Total:                    11/ 12

LATTYP: Found a simple orthorhombic cell.

ALAT = 14.7806000000

B/A-ratio = 1.2466138046

C/A-ratio = 1.4433717170

Lattice vectors:

A1 = ( -14.7806000000, 0.0000000000, 0.0000000000)

A2 = ( 0.0000000000, 0.0000000000, -18.4257000000)

A3 = ( 0.0000000000, -21.3339000000, 0.0000000000)

Analysis of symmetry for initial positions (statically):

=====

Subroutine PRICEL returns:

Original cell was already a primitive cell.

Routine SETGRP: Setting up the symmetry group for a  
simple orthorhombic supercell.

Subroutine GETGRP returns: Found 1 space group operations

(whereof 1 operations were pure point group operations)

out of a pool of 8 trial point group operations.

The static configuration has the point symmetry  $C_1$ .

Analysis of symmetry for dynamics (positions and initial velocities):

=====

Subroutine PRICEL returns:

Original cell was already a primitive cell.

Routine SETGRP: Setting up the symmetry group for a  
simple orthorhombic supercell.

Subroutine GETGRP returns: Found 1 space group operations

(whereof 1 operations were pure point group operations)

out of a pool of 8 trial point group operations.

The dynamic configuration has the point symmetry  $C_1$ .

Analysis of constrained symmetry for selective dynamics:

=====

Subroutine PRICEL returns:

Original cell was already a primitive cell.

Routine SETGRP: Setting up the symmetry group for a  
simple orthorhombic supercell.

Subroutine GETGRP returns: Found 1 space group operations  
(whereof 1 operations were pure point group operations)  
out of a pool of 8 trial point group operations.

The constrained configuration has the point symmetry  $C_1$ .

Analysis of structural, dynamic, and magnetic symmetry:

---

---

Subroutine PRICEL returns:

Original cell was already a primitive cell.

Routine SETGRP: Setting up the symmetry group for a  
simple orthorhombic supercell.

Subroutine GETGRP returns: Found 1 space group operations  
(whereof 1 operations were pure point group operations)  
out of a pool of 8 trial point group operations.

The magnetic configuration has the point symmetry C<sub>1</sub>.

Subroutine INISYM returns: Found 1 space group operations  
(whereof 1 operations are pure point group operations),  
and found 1 'primitive' translations

KPOINTS: KPT-Resolved Value to Generate K-Mesh: 0

Automatic generation of k-mesh.

Space group operators:

| irotn    | det(A)   | alpha    | n_x      | n_y      | n_z      | tau_x    |
|----------|----------|----------|----------|----------|----------|----------|
| tau_y    | tau_z    |          |          |          |          |          |
| 1        | 1.000000 | 0.000000 | 1.000000 | 0.000000 | 0.000000 | 0.000000 |
| 0.000000 | 0.000000 |          |          |          |          |          |

Subroutine IBZKPT returns following result:

=====

Found 1 irreducible k-points:

Following reciprocal coordinates:

| Coordinates |          |          | Weight   |
|-------------|----------|----------|----------|
| 0.000000    | 0.000000 | 0.000000 | 1.000000 |

Following cartesian coordinates:

| Coordinates |          |          | Weight   |
|-------------|----------|----------|----------|
| 0.000000    | 0.000000 | 0.000000 | 1.000000 |

WAVPRE: cpu time 0.1227: real time 0.1371  
FEWALD: cpu time 0.0026: real time 0.0027  
ORTHCH: cpu time 0.9980: real time 1.0013  
LOOP+: cpu time 181.7522: real time 182.8113

----- Iteration 13( 1) -----

POTLOK: cpu time 0.1650: real time 0.1785  
SETDIJ: cpu time 0.0101: real time 0.0101  
EDDIAG: cpu time 1.9284: real time 1.9354  
RMM-DIIS: cpu time 7.1161: real time 7.1416  
ORTHCH: cpu time 0.3539: real time 0.3550  
DOS: cpu time 0.0003: real time 0.0003  
CHARGE: cpu time 0.5249: real time 0.5265  
MIXING: cpu time 0.0045: real time 0.0045

-----  
LOOP: cpu time 10.1031: real time 10.1519

eigenvalue-minimisations : 1928

total energy-change (2. order) :-0.2280951E-01 (-0.5169459E+00)

|                    |             |               |           |
|--------------------|-------------|---------------|-----------|
| number of electron | 518.9999715 | magnetization | 0.9999998 |
| augmentation part  | 11.7385970  | magnetization | 0.0542874 |

Broyden mixing:

rms(total) = 0.36749E-01      rms(broyden)= 0.36176E-01

rms(prec ) = 0.37597E-01

weight for this iteration      100.00

Free energy of the ion-electron system (eV)

-----

alpha Z      PSCENC =      233.50077011

Ewald energy      TEWEN =      91336.43504288

-Hartree energy      DENC =      -107340.82083503

-exchange      EXHF =      0.00000000

-V(xc)+E(xc)      XCENC =      1743.80795069

PAW double counting      =      52162.76655977      -52225.67521870

entropy T\*S      EENTRO =      -0.00000000

eigenvalues      EBANDS =      -5817.13522346

atomic energy      EATOM =      18704.32991668

Solvation      Ediel\_sol =      0.00000000

-----

free energy      TOTEN =      -1202.79103707 eV

energy without entropy = -1202.79103707 energy(sigma->0) = -1202.79103707

-----

----- Iteration 13( 2) -----

|           |          |         |           |        |
|-----------|----------|---------|-----------|--------|
| POTLOK:   | cpu time | 0.1648: | real time | 0.1699 |
| SETDIJ:   | cpu time | 0.0101: | real time | 0.0101 |
| EDDIAG:   | cpu time | 1.9247: | real time | 1.9319 |
| RMM-DIIS: | cpu time | 7.3124: | real time | 7.3360 |
| ORTHCH:   | cpu time | 0.3534: | real time | 0.3545 |
| DOS:      | cpu time | 0.0004: | real time | 0.0004 |
| CHARGE:   | cpu time | 0.5253: | real time | 0.5271 |
| MIXING:   | cpu time | 0.0047: | real time | 0.0046 |

-----

|       |          |          |           |         |
|-------|----------|----------|-----------|---------|
| LOOP: | cpu time | 10.2959: | real time | 10.3344 |
|-------|----------|----------|-----------|---------|

eigenvalue-minimisations : 1943

total energy-change (2. order) : 0.2224865E-01 (-0.3774268E-02)

number of electron      518.9999715 magnetization      0.9999998

augmentation part      11.7439406 magnetization      0.0542722

Broyden mixing:

rms(total) = 0.30390E-01      rms(broyden)= 0.30353E-01

rms(prec ) = 0.31688E-01

weight for this iteration      100.00

eigenvalues of (default mixing \* dielectric matrix)

average eigenvalue GAMMA=      0.7551

0.7551

Free energy of the ion-electron system (eV)

-----

alpha Z      PSCENC =      233.50077011

Ewald energy      TEWEN =      91336.43504288

-Hartree energ DENC =      -107341.63854682

-exchange      EXHF =      0.00000000

-V(xc)+E(xc)      XCENC =      1743.81691003

PAW double counting = 52172.71634441 -52235.62927431

entropy T\*S EENTRO = -0.00000000

eigenvalues EBANDS = -5816.29995141

atomic energy EATOM = 18704.32991668

Solvation Ediel\_sol = 0.00000000

-----

free energy TOTEN = -1202.76878842 eV

energy without entropy = -1202.76878842 energy(sigma->0) = -1202.76878842

-----

----- Iteration 13( 3) -----

POTLOK: cpu time 0.1662: real time 0.1843

SETDIJ: cpu time 0.0101: real time 0.0102

EDDIAG: cpu time 1.9261: real time 1.9321

|           |          |          |           |         |
|-----------|----------|----------|-----------|---------|
| RMM-DIIS: | cpu time | 7.0829:  | real time | 7.1026  |
| ORTHCH:   | cpu time | 0.3526:  | real time | 0.3535  |
| DOS:      | cpu time | 0.0004:  | real time | 0.0004  |
| CHARGE:   | cpu time | 0.5247:  | real time | 0.5262  |
| MIXING:   | cpu time | 0.0048:  | real time | 0.0049  |
| -----     |          |          |           |         |
| LOOP:     | cpu time | 10.0677: | real time | 10.1142 |

eigenvalue-minimisations : 1926

total energy-change (2. order) : 0.1010947E-02 (-0.2040965E-03)

number of electron      518.9999715 magnetization      0.9999998

augmentation part      11.7413801 magnetization      0.0542751

Broyden mixing:

rms(total) = 0.16849E-01      rms(broyden)= 0.16844E-01

rms(prec ) = 0.17414E-01

weight for this iteration      100.00

eigenvalues of (default mixing \* dielectric matrix)

average eigenvalue GAMMA=      1.3850

2.1279    0.6421

Free energy of the ion-electron system (eV)

-----

alpha Z        PSCENC =        233.50077011

Ewald energy    TEWEN =        91336.43504288

-Hartree energy DENC =    -107342.07331397

-exchange       EXHF =            0.00000000

-V(xc)+E(xc)    XCENC =        1743.83870421

PAW double counting =    52177.74382866    -52240.66498885

entropy T\*S     EENTRO =        -0.00000000

eigenvalues     EBANDS =       -5815.87773720

atomic energy   EATOM =        18704.32991668

Solvation    Ediel\_sol =        0.00000000

-----

free energy     TOTEN =       -1202.76777748 eV

energy without entropy =    -1202.76777748    energy(sigma->0) =    -1202.76777748

-----

----- Iteration 13( 4) -----

POTLOK: cpu time 0.1628: real time 0.1682  
SETDIJ: cpu time 0.0101: real time 0.0102  
EDDIAG: cpu time 1.9271: real time 1.9334  
RMM-DIIS: cpu time 7.1870: real time 7.2155  
ORTHCH: cpu time 0.3535: real time 0.3546  
DOS: cpu time 0.0004: real time 0.0004  
CHARGE: cpu time 0.5260: real time 0.5278  
MIXING: cpu time 0.0054: real time 0.0054

-----

LOOP: cpu time 10.1723: real time 10.2155

eigenvalue-minimisations : 1932

total energy-change (2. order) :-0.8858703E-04 (-0.2035647E-03)

number of electron 518.9999715 magnetization 0.9999998

augmentation part 11.7397596 magnetization 0.0542758

Broyden mixing:

rms(total) = 0.74847E-02 rms(broyden)= 0.74760E-02

rms( prec ) = 0.82135E-02

weight for this iteration      100.00

eigenvalues of (default mixing \* dielectric matrix)

average eigenvalue GAMMA=    1.3282

2.3186   0.8331   0.8331

Free energy of the ion-electron system (eV)

-----

alpha Z          PSCENC =          233.50077011

Ewald energy    TEWEN =          91336.43504288

-Hartree energ DENC =   -107342.93953291

-exchange       EXHF =           0.00000000

-V(xc)+E(xc)    XCENC =          1743.86138850

PAW double counting =    52188.93113613   -52251.86206993

entropy T\*S     EENTRO =          -0.00000000

eigenvalues     EBANDS =       -5815.02451752

atomic energy   EATOM =          18704.32991668

Solvation    Ediel\_sol =          0.00000000

-----

free energy     TOTEN =         -1202.76786606 eV

energy without entropy = -1202.76786606 energy(sigma->0) = -1202.76786606

-----

----- Iteration 13( 5) -----

|           |          |          |           |         |
|-----------|----------|----------|-----------|---------|
| POTLOK:   | cpu time | 0.1687:  | real time | 0.1737  |
| SETDIJ:   | cpu time | 0.0102:  | real time | 0.0103  |
| EDDIAG:   | cpu time | 1.9290:  | real time | 1.9344  |
| RMM-DIIS: | cpu time | 7.0893:  | real time | 7.1162  |
| ORTHCH:   | cpu time | 0.3528:  | real time | 0.3537  |
| DOS:      | cpu time | 0.0004:  | real time | 0.0004  |
| CHARGE:   | cpu time | 0.5256:  | real time | 0.5272  |
| MIXING:   | cpu time | 0.0057:  | real time | 0.0057  |
| -----     |          |          |           |         |
| LOOP:     | cpu time | 10.0817: | real time | 10.1216 |

eigenvalue-minimisations : 1913

total energy-change (2. order) : 0.1309032E-03 (-0.9830713E-05)

number of electron      518.9999715 magnetization      0.9999998

augmentation part      11.7405381 magnetization      0.0542717

Broyden mixing:

rms(total) = 0.24648E-02      rms(broyden)= 0.24610E-02

rms(prec ) = 0.27390E-02

weight for this iteration      100.00

eigenvalues of (default mixing \* dielectric matrix)

average eigenvalue GAMMA=      1.3987

2.3302   1.6396   0.8125   0.8125

Free energy of the ion-electron system (eV)

-----

alpha Z      PSCENC =      233.50077011

Ewald energy      TEWEN =      91336.43504288

-Hartree energ DENC =      -107343.07295804

-exchange      EXHF =      0.00000000

-V(xc)+E(xc)      XCENC =      1743.85659030

PAW double counting =      52190.39499756      -52253.32466643

entropy T\*S    EENTRO =        -0.00000000

eigenvalues    EBANDS =       -5814.88742823

atomic energy  EATOM  =       18704.32991668

Solvation    Ediel\_sol  =        0.00000000

-----

free energy    TOTEN  =       -1202.76773516 eV

energy without entropy =    -1202.76773516    energy(sigma->0) =    -1202.76773516

-----

----- Iteration    13( 6) -----

POTLOK:    cpu time    0.1674: real time    0.1930

SETDIJ:    cpu time    0.0102: real time    0.0102

EDDIAG:    cpu time    1.9260: real time    1.9325

RMM-DIIS:    cpu time    6.9437: real time    6.9905

ORTHCH: cpu time 0.3541: real time 0.3552

DOS: cpu time 0.0004: real time 0.0004

CHARGE: cpu time 0.5256: real time 0.5274

MIXING: cpu time 0.0059: real time 0.0059

-----

LOOP: cpu time 9.9333: real time 10.0152

eigenvalue-minimisations : 1896

total energy-change (2. order) :-0.6196409E-05 (-0.5490530E-05)

number of electron 518.9999715 magnetization 0.9999998

augmentation part 11.7410478 magnetization 0.0542703

Broyden mixing:

rms(total) = 0.14212E-02 rms(broyden)= 0.14157E-02

rms(prec ) = 0.15801E-02

weight for this iteration 100.00

eigenvalues of (default mixing \* dielectric matrix)

average eigenvalue GAMMA= 1.4100

2.4873 1.8847 0.7550 0.9616 0.9616

Free energy of the ion-electron system (eV)

---

alpha Z        PSCENC =        233.50077011

Ewald energy    TEWEN =        91336.43504288

-Hartree energ DENC =    -107343.18426981

-exchange       EXHF =            0.00000000

-V(xc)+E(xc)    XCENC =        1743.85316818

PAW double counting =    52191.05269600    -52253.98126648

entropy T\*S     EENTRO =        -0.00000000

eigenvalues     EBANDS =        -5814.77379892

atomic energy   EATOM =        18704.32991668

Solvation    Ediel\_sol =        0.00000000

---

free energy     TOTEN =        -1202.76774136 eV

energy without entropy =    -1202.76774136    energy(sigma->0) =    -1202.76774136

---

----- Iteration 13( 7) -----

|           |          |         |           |        |
|-----------|----------|---------|-----------|--------|
| POTLOK:   | cpu time | 0.1659: | real time | 0.1815 |
| SETDIJ:   | cpu time | 0.0100: | real time | 0.0101 |
| EDDIAG:   | cpu time | 1.9258: | real time | 1.9325 |
| RMM-DIIS: | cpu time | 6.8997: | real time | 6.9239 |
| ORTHCH:   | cpu time | 0.3528: | real time | 0.3539 |
| DOS:      | cpu time | 0.0004: | real time | 0.0004 |
| CHARGE:   | cpu time | 0.5251: | real time | 0.5268 |
| MIXING:   | cpu time | 0.0061: | real time | 0.0061 |
| -----     |          |         |           |        |
| LOOP:     | cpu time | 9.8857: | real time | 9.9351 |

eigenvalue-minimisations : 1855

total energy-change (2. order) :-0.1259329E-04 (-0.7936526E-06)

number of electron 518.9999715 magnetization 0.9999998

augmentation part 11.7409116 magnetization 0.0542692

Broyden mixing:

rms(total) = 0.35718E-03 rms(broyden)= 0.35693E-03

rms(prec ) = 0.54343E-03

weight for this iteration      100.00

eigenvalues of (default mixing \* dielectric matrix)

average eigenvalue GAMMA=    1.3500

2.5410   1.9619   1.0312   1.0312   0.8021   0.7324

Free energy of the ion-electron system (eV)

-----  
alpha Z          PSCENC =          233.50077011

Ewald energy    TEWEN =          91336.43504288

-Hartree energ DENC =   -107343.29376789

-exchange       EXHF =            0.00000000

-V(xc)+E(xc)   XCENC =          1743.85460588

PAW double counting =    52191.35246590   -52254.28140743

entropy T\*S     EENTRO =          -0.00000000

eigenvalues     EBANDS =          -5814.66538008

atomic energy   EATOM =          18704.32991668

Solvation    Ediel\_sol =          0.00000000

-----  
free energy      TOTEN =          -1202.76775395 eV

energy without entropy =   -1202.76775395    energy(sigma->0) =   -1202.76775395

-----

----- Iteration 13( 8) -----

|           |          |         |           |        |
|-----------|----------|---------|-----------|--------|
| POTLOK:   | cpu time | 0.1645: | real time | 0.1737 |
| SETDIJ:   | cpu time | 0.0100: | real time | 0.0100 |
| EDDIAG:   | cpu time | 1.9280: | real time | 1.9342 |
| RMM-DIIS: | cpu time | 6.1593: | real time | 6.1863 |
| ORTHCH:   | cpu time | 0.3531: | real time | 0.3541 |
| DOS:      | cpu time | 0.0004: | real time | 0.0004 |
| CHARGE:   | cpu time | 0.5254: | real time | 0.5268 |
| MIXING:   | cpu time | 0.0063: | real time | 0.0064 |
| -----     |          |         |           |        |
| LOOP:     | cpu time | 9.1470: | real time | 9.1919 |

eigenvalue-minimisations : 1682

total energy-change (2. order) :-0.1539907E-04 (-0.1631728E-06)

number of electron      518.9999715 magnetization      0.9999998

augmentation part      11.7408683 magnetization      0.0542690

Broyden mixing:

rms(total) = 0.22773E-03      rms(broyden)= 0.22744E-03

rms(prec ) = 0.40539E-03

weight for this iteration      100.00

eigenvalues of (default mixing \* dielectric matrix)

average eigenvalue GAMMA=      1.3888

2.4539   2.4539   1.3577   1.0066   1.0066   0.7778   0.6653

Free energy of the ion-electron system (eV)

-----

alpha Z      PSCENC =      233.50077011

Ewald energy      TEWEN =      91336.43504288

-Hartree energ DENC =      -107343.36769588

-exchange      EXHF =      0.00000000

-V(xc)+E(xc)      XCENC =      1743.85521855

PAW double counting =      52191.31740740      -52254.24647293

entropy T\*S      EENTRO =      -0.00000000

eigenvalues EBANDS = -5814.59195616

atomic energy EATOM = 18704.32991668

Solvation Ediel\_sol = 0.00000000

-----  
free energy TOTEN = -1202.76776935 eV

energy without entropy = -1202.76776935 energy(sigma->0) = -1202.76776935

----- Iteration 13( 9) -----

POTLOK: cpu time 0.1652: real time 0.1723

SETDIJ: cpu time 0.0101: real time 0.0101

EDDIAG: cpu time 1.9251: real time 1.9311

RMM-DIIS: cpu time 6.0520: real time 6.0792

ORTHCH: cpu time 0.3537: real time 0.3546

DOS: cpu time 0.0004: real time 0.0004

CHARGE: cpu time 0.5260: real time 0.5277

MIXING: cpu time 0.0066: real time 0.0066

-----

LOOP: cpu time 9.0390: real time 9.0821

eigenvalue-minimisations : 1627

total energy-change (2. order) :-0.2325241E-04 (-0.7171427E-07)

number of electron 518.9999715 magnetization 0.9999998

augmentation part 11.7408887 magnetization 0.0542689

Broyden mixing:

rms(total) = 0.11626E-03 rms(broyden)= 0.11612E-03

rms(prec ) = 0.24075E-03

weight for this iteration 100.00

eigenvalues of (default mixing \* dielectric matrix)

average eigenvalue GAMMA= 1.4589

2.9930 2.6377 1.6582 0.9898 0.9898 0.9838 0.7750 0.6441

Free energy of the ion-electron system (eV)

-----

alpha Z PSCENC = 233.50077011  
Ewald energy TEWEN = 91336.43504288  
-Hartree energy DENC = -107343.47149478  
-exchange EXHF = 0.00000000  
-V(xc)+E(xc) XCENC = 1743.85561782  
PAW double counting = 52191.19614696 -52254.12525014  
entropy T\*S EENTRO = -0.00000000  
eigenvalues EBANDS = -5814.48854214  
atomic energy EATOM = 18704.32991668  
Solvation Ediel\_sol = 0.00000000

-----

free energy TOTEN = -1202.76779260 eV

energy without entropy = -1202.76779260 energy(sigma->0) = -1202.76779260

-----

|           |          |         |           |        |
|-----------|----------|---------|-----------|--------|
| POTLOK:   | cpu time | 0.1677: | real time | 0.1870 |
| SETDIJ:   | cpu time | 0.0100: | real time | 0.0101 |
| EDDIAG:   | cpu time | 1.9291: | real time | 1.9341 |
| RMM-DIIS: | cpu time | 5.9106: | real time | 5.9245 |
| ORTHCH:   | cpu time | 0.3554: | real time | 0.3563 |
| DOS:      | cpu time | 0.0005: | real time | 0.0005 |
| CHARGE:   | cpu time | 0.5255: | real time | 0.5269 |
| MIXING:   | cpu time | 0.0072: | real time | 0.0072 |
| -----     |          |         |           |        |
| LOOP:     | cpu time | 8.9061: | real time | 8.9466 |

eigenvalue-minimisations : 1596

total energy-change (2. order) :-0.2080721E-04 (-0.6742736E-07)

number of electron      518.9999715 magnetization      0.9999998

augmentation part      11.7408968 magnetization      0.0542684

Broyden mixing:

rms(total) = 0.85608E-04      rms(broyden)= 0.85505E-04

rms(prec ) = 0.14853E-03

weight for this iteration      100.00

eigenvalues of (default mixing \* dielectric matrix)

average eigenvalue GAMMA= 1.4868

3.5399 2.5775 1.8275 1.0583 1.0583 1.1257 0.7795 0.7795 0.6348

Free energy of the ion-electron system (eV)

-----

alpha Z PSCENC = 233.50077011

Ewald energy TEWEN = 91336.43504288

-Hartree energy DENC = -107343.56108892

-exchange EXHF = 0.00000000

-V(xc)+E(xc) XCENC = 1743.85604322

PAW double counting = 52191.12219619 -52254.05135600

entropy T\*S EENTRO = -0.00000000

eigenvalues EBANDS = -5814.39933757

atomic energy EATOM = 18704.32991668

Solvation Ediel\_sol = 0.00000000

-----

free energy TOTEN = -1202.76781341 eV

energy without entropy = -1202.76781341 energy(sigma->0) = -1202.76781341

-----

----- Iteration 13( 11) -----

|           |          |         |           |        |
|-----------|----------|---------|-----------|--------|
| POTLOK:   | cpu time | 0.1666: | real time | 0.1751 |
| SETDIJ:   | cpu time | 0.0100: | real time | 0.0100 |
| EDDIAG:   | cpu time | 1.9260: | real time | 1.9327 |
| RMM-DIIS: | cpu time | 5.7583: | real time | 5.7769 |
| ORTHCH:   | cpu time | 0.3560: | real time | 0.3572 |
| DOS:      | cpu time | 0.0004: | real time | 0.0004 |
| CHARGE:   | cpu time | 0.5252: | real time | 0.5270 |
| MIXING:   | cpu time | 0.0074: | real time | 0.0074 |

-----

|       |          |         |           |        |
|-------|----------|---------|-----------|--------|
| LOOP: | cpu time | 8.7498: | real time | 8.7866 |
|-------|----------|---------|-----------|--------|

eigenvalue-minimisations : 1559

total energy-change (2. order) :-0.1581067E-04 (-0.4273747E-07)

number of electron      518.9999715 magnetization      0.9999998

augmentation part      11.7408926 magnetization      0.0542683

Broyden mixing:

rms(total) = 0.60856E-04      rms(broyden)= 0.60825E-04

rms(prec ) = 0.94224E-04

weight for this iteration      100.00

eigenvalues of (default mixing \* dielectric matrix)

average eigenvalue GAMMA=      1.6089

4.7295   2.5694   2.1304   1.5695   1.0049   1.0049   0.9965   0.7724   0.6889   0.6221

Free energy of the ion-electron system (eV)

-----

alpha Z      PSCENC =      233.50077011

Ewald energy      TEWEN =      91336.43504288

-Hartree energ DENC =      -107343.61562200

-exchange      EXHF =      0.00000000

-V(xc)+E(xc)      XCENC =      1743.85630386

PAW double counting =      52191.10348316      -52254.03266969

entropy T\*S      EENTRO =      -0.00000000

eigenvalues      EBANDS =      -5814.34505423

atomic energy EATOM = 18704.32991668

Solvation Ediel\_sol = 0.00000000

-----  
free energy TOTEN = -1202.76782922 eV

energy without entropy = -1202.76782922 energy(sigma->0) = -1202.76782922

----- Iteration 13( 12) -----

POTLOK: cpu time 0.1645: real time 0.1685

SETDIJ: cpu time 0.0101: real time 0.0101

EDDIAG: cpu time 1.9276: real time 1.9342

RMM-DIIS: cpu time 5.2182: real time 5.2384

ORTHCH: cpu time 0.3534: real time 0.3547

DOS: cpu time 0.0004: real time 0.0004

CHARGE:  cpu time     0.5249: real time     0.5266

MIXING:  cpu time     0.0078: real time     0.0078

-----

LOOP:  cpu time     8.2070: real time     8.2408

eigenvalue-minimisations  :  1443

total energy-change (2. order) :-0.8936768E-05  (-0.1385461E-07)

number of electron       518.9999715 magnetization       0.9999998

augmentation part       11.7408960 magnetization       0.0542681

Broyden mixing:

rms(total) = 0.36893E-04     rms(broyden)= 0.36874E-04

rms(prec ) = 0.59680E-04

weight for this iteration     100.00

eigenvalues of (default mixing \* dielectric matrix)

average eigenvalue GAMMA=    1.6640

5.6027  2.5978  2.2181  1.6736  1.0524  1.0524  1.1203  0.9136  0.7860  0.6712

0.6164

Free energy of the ion-electron system (eV)

-----

alpha Z        PSCENC =        233.50077011  
Ewald energy    TEWEN =        91336.43504288  
-Hartree energ DENC =    -107343.64325912  
-exchange       EXHF =        0.00000000  
-V(xc)+E(xc)   XCENC =        1743.85637820  
PAW double counting =    52191.09715666   -52254.02633571  
entropy T\*S     EENTRO =        -0.00000000  
eigenvalues     EBANDS =        -5814.31750786  
atomic energy   EATOM =        18704.32991668  
Solvation    Ediel\_sol =        0.00000000

-----

free energy     TOTEN =        -1202.76783816 eV

energy without entropy =    -1202.76783816    energy(sigma->0) =    -1202.76783816

-----

|           |          |         |           |        |
|-----------|----------|---------|-----------|--------|
| POTLOK:   | cpu time | 0.1655: | real time | 0.1740 |
| SETDIJ:   | cpu time | 0.0100: | real time | 0.0101 |
| EDDIAG:   | cpu time | 1.9235: | real time | 1.9429 |
| RMM-DIIS: | cpu time | 4.9823: | real time | 5.0115 |
| ORTHCH:   | cpu time | 0.3529: | real time | 0.3540 |
| DOS:      | cpu time | 0.0004: | real time | 0.0004 |
| CHARGE:   | cpu time | 0.5257: | real time | 0.5275 |
| MIXING:   | cpu time | 0.0083: | real time | 0.0084 |
| -----     |          |         |           |        |
| LOOP:     | cpu time | 7.9687: | real time | 8.0288 |

eigenvalue-minimisations : 1369

total energy-change (2. order) :-0.6661565E-05 (-0.6117372E-08)

number of electron 518.9999715 magnetization 0.9999998

augmentation part 11.7409002 magnetization 0.0542681

Broyden mixing:

rms(total) = 0.21850E-04 rms(broyden)= 0.21818E-04

rms(prec ) = 0.38145E-04

weight for this iteration 100.00

eigenvalues of (default mixing \* dielectric matrix)

average eigenvalue GAMMA= 1.7582

6.4859 2.8032 2.4754 1.9120 1.4388 1.0203 1.0203 1.0445 0.8094 0.8094

0.6640 0.6155

Free energy of the ion-electron system (eV)

-----  
alpha Z PSCENC = 233.50077011

Ewald energy TEWEN = 91336.43504288

-Hartree energ DENC = -107343.65507710

-exchange EXHF = 0.00000000

-V(xc)+E(xc) XCENC = 1743.85637435

PAW double counting = 52191.10020984 -52254.02937476

entropy T\*S EENTRO = -0.00000000

eigenvalues EBANDS = -5814.30570682

atomic energy EATOM = 18704.32991668

Solvation Ediel\_sol = 0.00000000

-----  
free energy TOTEN = -1202.76784482 eV

energy without entropy = -1202.76784482 energy(sigma->0) = -1202.76784482

-----

----- Iteration 13( 14) -----

|           |          |         |           |        |
|-----------|----------|---------|-----------|--------|
| POTLOK:   | cpu time | 0.1783: | real time | 0.1946 |
| SETDIJ:   | cpu time | 0.0101: | real time | 0.0101 |
| EDDIAG:   | cpu time | 1.9277: | real time | 1.9340 |
| RMM-DIIS: | cpu time | 5.0018: | real time | 5.0305 |
| ORTHCH:   | cpu time | 0.3525: | real time | 0.3538 |
| DOS:      | cpu time | 0.0004: | real time | 0.0004 |
| CHARGE:   | cpu time | 0.5252: | real time | 0.5268 |
| MIXING:   | cpu time | 0.0084: | real time | 0.0084 |
| -----     |          |         |           |        |
| LOOP:     | cpu time | 8.0045: | real time | 8.0586 |

eigenvalue-minimisations : 1402

total energy-change (2. order) :-0.6393933E-05 (-0.6102247E-08)

number of electron      518.9999715 magnetization      0.9999998

augmentation part      11.7408987 magnetization      0.0542681

Broyden mixing:

rms(total) = 0.12301E-04      rms(broyden)= 0.12295E-04

rms(prec ) = 0.20521E-04

weight for this iteration      100.00

eigenvalues of (default mixing \* dielectric matrix)

average eigenvalue GAMMA=      1.7638

6.9143   3.1461   2.5264   1.9883   1.3406   1.2454   1.0334   1.0334   0.8761   0.7894

0.7625   0.6573   0.6169

Free energy of the ion-electron system (eV)

-----

alpha Z      PSCENC =      233.50077011

Ewald energy      TEWEN =      91336.43504288

-Hartree energ      DENC =      -107343.66329204

-exchange      EXHF =      0.00000000

-V(xc)+E(xc)      XCENC =      1743.85638221

PAW double counting =      52191.10855329      -52254.03771526

entropy T\*S    EENTRO =        -0.00000000

eigenvalues    EBANDS =        -5814.29750909

atomic energy  EATOM  =        18704.32991668

Solvation    Ediel\_sol  =        0.00000000

-----  
free energy    TOTEN  =        -1202.76785121 eV

energy without entropy =    -1202.76785121    energy(sigma->0) =    -1202.76785121

-----  
----- Iteration        13( 15) -----

POTLOK:    cpu time        0.1669: real time        0.1689

SETDIJ:    cpu time        0.0101: real time        0.0102

EDDIAG:    cpu time        1.9274: real time        1.9339

RMM-DIIS:    cpu time        4.7194: real time        4.7402

ORTHCH: cpu time 0.3601: real time 0.3612

DOS: cpu time 0.0004: real time 0.0004

CHARGE: cpu time 0.5265: real time 0.5285

MIXING: cpu time 0.0090: real time 0.0090

-----

LOOP: cpu time 7.7198: real time 7.7521

eigenvalue-minimisations : 1281

total energy-change (2. order) :-0.2289620E-05 (-0.1467913E-08)

number of electron 518.9999715 magnetization 0.9999998

augmentation part 11.7408984 magnetization 0.0542681

Broyden mixing:

rms(total) = 0.87674E-05 rms(broyden)= 0.87627E-05

rms(prec ) = 0.14056E-04

weight for this iteration 100.00

eigenvalues of (default mixing \* dielectric matrix)

average eigenvalue GAMMA= 1.8907

7.5068 4.0069 2.5537 2.3369 1.8061 1.5317 1.0353 1.0353 1.0291 0.8757

0.8011 0.6906 0.6186 0.6425

Free energy of the ion-electron system (eV)

-----

alpha Z        PSCENC =        233.50077011

Ewald energy    TEWEN =        91336.43504288

-Hartree energy DENC =   -107343.66474909

-exchange       EXHF =            0.00000000

-V(xc)+E(xc)    XCENC =        1743.85637250

PAW double counting =    52191.10895551   -52254.03811874

entropy T\*S     EENTRO =       -0.00000000

eigenvalues     EBANDS =       -5814.29604335

atomic energy   EATOM =       18704.32991668

Solvation    Ediel\_sol =        0.00000000

-----

free energy     TOTEN =       -1202.76785350 eV

energy without entropy =   -1202.76785350    energy(sigma->0) =   -1202.76785350

-----

----- Iteration 13( 16) -----

|           |          |         |           |        |
|-----------|----------|---------|-----------|--------|
| POTLOK:   | cpu time | 0.1643: | real time | 0.1791 |
| SETDIJ:   | cpu time | 0.0098: | real time | 0.0099 |
| EDDIAG:   | cpu time | 1.9247: | real time | 1.9311 |
| RMM-DIIS: | cpu time | 4.8116: | real time | 4.8325 |
| ORTHCH:   | cpu time | 0.3530: | real time | 0.3542 |
| DOS:      | cpu time | 0.0004: | real time | 0.0004 |
| CHARGE:   | cpu time | 0.5262: | real time | 0.5281 |
| MIXING:   | cpu time | 0.0102: | real time | 0.0102 |

-----

|       |          |         |           |        |
|-------|----------|---------|-----------|--------|
| LOOP: | cpu time | 7.8002: | real time | 7.8454 |
|-------|----------|---------|-----------|--------|

eigenvalue-minimisations : 1312

total energy-change (2. order) :-0.1648314E-05 (-0.1303079E-08)

|                    |             |               |           |
|--------------------|-------------|---------------|-----------|
| number of electron | 518.9999715 | magnetization | 0.9999998 |
|--------------------|-------------|---------------|-----------|

|                   |            |               |           |
|-------------------|------------|---------------|-----------|
| augmentation part | 11.7408987 | magnetization | 0.0542681 |
|-------------------|------------|---------------|-----------|

Broyden mixing:

|                          |                           |
|--------------------------|---------------------------|
| rms(total) = 0.41857E-05 | rms(broyden)= 0.41824E-05 |
|--------------------------|---------------------------|

rms(prec ) = 0.70445E-05

weight for this iteration 100.00

eigenvalues of (default mixing \* dielectric matrix)

average eigenvalue GAMMA= 1.9035

7.8643 4.5611 2.6209 2.5057 1.9104 1.3857 1.0411 1.0411 1.0176 1.0176

0.8257 0.8257 0.6841 0.6167 0.6353

Free energy of the ion-electron system (eV)

-----

alpha Z PSCENC = 233.50077011

Ewald energy TEWEN = 91336.43504288

-Hartree energy DENC = -107343.66560637

-exchange EXHF = 0.00000000

-V(xc)+E(xc) XCENC = 1743.85635697

PAW double counting = 52191.10630533 -52254.03547130

entropy T\*S EENTRO = -0.00000000

eigenvalues EBANDS = -5814.29516945

atomic energy EATOM = 18704.32991668

Solvation Ediel\_sol = 0.00000000

-----

free energy TOTEN = -1202.76785515 eV

energy without entropy = -1202.76785515 energy(sigma->0) = -1202.76785515

-----

----- Iteration 13( 17) -----

|           |          |         |           |        |
|-----------|----------|---------|-----------|--------|
| POTLOK:   | cpu time | 0.1703: | real time | 0.1725 |
| SETDIJ:   | cpu time | 0.0099: | real time | 0.0100 |
| EDDIAG:   | cpu time | 1.9386: | real time | 1.9448 |
| RMM-DIIS: | cpu time | 4.2734: | real time | 4.2873 |
| ORTHCH:   | cpu time | 0.3553: | real time | 0.3564 |
| DOS:      | cpu time | 0.0004: | real time | 0.0004 |
| CHARGE:   | cpu time | 0.5254: | real time | 0.5272 |
| MIXING:   | cpu time | 0.0096: | real time | 0.0096 |

-----

|       |          |         |           |        |
|-------|----------|---------|-----------|--------|
| LOOP: | cpu time | 7.2829: | real time | 7.3081 |
|-------|----------|---------|-----------|--------|

eigenvalue-minimisations : 1046

total energy-change (2. order) :-0.3504101E-06 (-0.2954215E-09)

number of electron      518.9999715 magnetization      0.9999998

augmentation part      11.7408986 magnetization      0.0542681

Broyden mixing:

rms(total) = 0.27162E-05      rms(broyden)= 0.27153E-05

rms(prec ) = 0.47157E-05

weight for this iteration      100.00

eigenvalues of (default mixing \* dielectric matrix)

average eigenvalue GAMMA=      1.9269

8.0614  4.9591  2.7569  2.5493  1.9932  1.5107  1.5107  1.0375  1.0375  1.0540

0.8807  0.8005  0.7549  0.6781  0.6148  0.6316

Free energy of the ion-electron system (eV)

-----

alpha Z      PSCENC =      233.50077011

Ewald energy      TEWEN =      91336.43504288

-Hartree energ DENC      =      -107343.66583546

-exchange      EXHF =      0.00000000

-V(xc)+E(xc) XCENC = 1743.85635561

PAW double counting = 52191.10467360 -52254.03384116

entropy T\*S EENTRO = -0.00000000

eigenvalues EBANDS = -5814.29493776

atomic energy EATOM = 18704.32991668

Solvation Ediel\_sol = 0.00000000

-----

free energy TOTEN = -1202.76785550 eV

energy without entropy = -1202.76785550 energy(sigma->0) = -1202.76785550

-----

----- Iteration 13( 18) -----

POTLOK: cpu time 0.1687: real time 0.1887

SETDIJ: cpu time 0.0142: real time 0.0179

|           |          |         |           |        |
|-----------|----------|---------|-----------|--------|
| EDDIAG:   | cpu time | 1.9315: | real time | 1.9379 |
| RMM-DIIS: | cpu time | 4.2957: | real time | 4.3226 |
| ORTHCH:   | cpu time | 0.3528: | real time | 0.3540 |
| DOS:      | cpu time | 0.0004: | real time | 0.0004 |
| CHARGE:   | cpu time | 0.5244: | real time | 0.5261 |
| MIXING:   | cpu time | 0.0102: | real time | 0.0103 |
| -----     |          |         |           |        |
| LOOP:     | cpu time | 7.2979: | real time | 7.3579 |

eigenvalue-minimisations : 1060

total energy-change (2. order) :-0.2259840E-06 (-0.1785141E-09)

|                    |             |               |           |
|--------------------|-------------|---------------|-----------|
| number of electron | 518.9999715 | magnetization | 0.9999998 |
| augmentation part  | 11.7408985  | magnetization | 0.0542682 |

Broyden mixing:

rms(total) = 0.19290E-05      rms(broyden)= 0.19281E-05

rms(prec ) = 0.29924E-05

weight for this iteration      100.00

eigenvalues of (default mixing \* dielectric matrix)

average eigenvalue GAMMA=      1.9717

8.2619   5.4959   3.1894   2.5684   2.2690   1.8506   1.3872   1.0391   1.0391   1.0730

1.0730 0.8305 0.8305 0.6972 0.6682 0.6157 0.6296

Free energy of the ion-electron system (eV)

-----

alpha Z        PSCENC =        233.50077011

Ewald energy    TEWEN =        91336.43504288

-Hartree energ DENC =   -107343.66588577

-exchange       EXHF =            0.00000000

-V(xc)+E(xc)    XCENC =        1743.85635284

PAW double counting =    52191.10401072   -52254.03317867

entropy T\*S     EENTRO =        -0.00000000

eigenvalues     EBANDS =       -5814.29488452

atomic energy   EATOM =        18704.32991668

Solvation    Ediel\_sol =        0.00000000

-----

free energy     TOTEN =       -1202.76785573 eV

energy without entropy =   -1202.76785573    energy(sigma->0) =   -1202.76785573

-----

----- Iteration 13( 19) -----

POTLOK: cpu time 0.1643: real time 0.1725  
SETDIJ: cpu time 0.0101: real time 0.0101  
EDDIAG: cpu time 1.9238: real time 1.9307  
RMM-DIIS: cpu time 4.1888: real time 4.2060  
ORTHCH: cpu time 0.3557: real time 0.3569  
DOS: cpu time 0.0003: real time 0.0003

-----

LOOP: cpu time 6.6431: real time 6.6765

eigenvalue-minimisations : 988

total energy-change (2. order) :-0.7505878E-07 (-0.9728574E-10)

number of electron 518.9999715 magnetization 0.9999998

augmentation part 11.7408985 magnetization 0.0542682

Free energy of the ion-electron system (eV)

-----

alpha Z        PSCENC =        233.50077011  
Ewald energy    TEWEN =        91336.43504288  
  
-Hartree energ DENC =    -107343.66587034  
  
-exchange       EXHF =        0.00000000  
  
-V(xc)+E(xc)   XCENC =        1743.85634892  
  
PAW double counting =    52191.10418114    -52254.03334866  
  
entropy T\*S     EENTRO =        -0.00000000  
  
eigenvalues     EBANDS =        -5814.29489654  
  
atomic energy   EATOM =        18704.32991668  
  
Solvation    Ediel\_sol =        0.00000000

-----

free energy     TOTEN =        -1202.76785580 eV

energy without entropy =    -1202.76785580    energy(sigma->0) =    -1202.76785580

-----

average (electrostatic) potential at core

the test charge radii are      0.5201   0.6991   1.0621   0.7215

(the norm of the test charge is                      1.0000)

|             |             |             |             |              |
|-------------|-------------|-------------|-------------|--------------|
| 1 -40.7509  | 2 -40.7487  | 3 -40.7502  | 4 -40.7487  | 5 -40.7509   |
| 6 -40.7530  | 7 -40.7506  | 8 -40.7583  | 9 -40.7502  | 10 -40.7578  |
| 11 -40.7516 | 12 -40.7536 | 13 -40.6470 | 14 -40.6939 | 15 -40.7672  |
| 16 -40.6960 | 17 -40.6901 | 18 -40.8602 | 19 -40.6772 | 20 -40.6642  |
| 21 -40.6866 | 22 -40.6597 | 23 -40.0868 | 24 -40.1283 | 25 -57.4568  |
| 26 -57.6677 | 27 -57.6548 | 28 -57.4665 | 29 -57.6610 | 30 -57.4568  |
| 31 -57.6675 | 32 -57.6544 | 33 -57.4645 | 34 -57.6658 | 35 -57.4576  |
| 36 -57.6694 | 37 -57.6544 | 38 -57.4668 | 39 -57.6717 | 40 -57.4567  |
| 41 -57.6734 | 42 -57.6546 | 43 -57.4716 | 44 -57.6864 | 45 -57.4567  |
| 46 -57.6724 | 47 -57.6554 | 48 -57.4719 | 49 -57.6773 | 50 -57.4578  |
| 51 -57.6690 | 52 -57.6552 | 53 -57.4695 | 54 -57.6637 | 55 -57.6346  |
| 56 -57.6605 | 57 -57.6845 | 58 -57.6804 | 59 -57.6642 | 60 -57.6671  |
| 61 -57.6873 | 62 -57.6718 | 63 -57.6348 | 64 -57.6600 | 65 -57.6866  |
| 66 -57.6920 | 67 -57.6625 | 68 -57.6669 | 69 -57.6910 | 70 -57.6981  |
| 71 -57.6343 | 72 -57.6614 | 73 -57.6942 | 74 -57.7189 | 75 -57.6634  |
| 76 -57.6675 | 77 -57.7033 | 78 -57.7480 | 79 -57.6345 | 80 -57.6640  |
| 81 -57.7080 | 82 -57.7495 | 83 -57.6666 | 84 -57.6690 | 85 -57.7348  |
| 86 -57.8387 | 87 -57.6369 | 88 -57.6647 | 89 -57.7099 | 90 -57.7143  |
| 91 -57.6713 | 92 -57.6693 | 93 -57.7395 | 94 -57.7563 | 95 -57.6353  |
| 96 -57.6628 | 97 -57.6936 | 98 -57.6878 | 99 -57.6686 | 100 -57.6680 |

|              |              |              |              |              |
|--------------|--------------|--------------|--------------|--------------|
| 101 -57.7052 | 102 -57.6830 | 103 -57.6580 | 104 -57.6285 | 105 -57.6425 |
| 106 -57.2862 | 107 -57.3856 | 108 -57.6289 | 109 -57.5941 | 110 -57.6569 |
| 111 -57.6285 | 112 -57.6390 | 113 -57.3049 | 114 -57.3913 | 115 -57.6282 |
| 116 -57.5960 | 117 -57.6562 | 118 -57.6203 | 119 -57.6950 | 120 -57.6782 |
| 121 -57.3850 | 122 -57.6270 | 123 -57.7060 | 124 -57.6571 | 125 -57.6230 |
| 126 -57.8293 | 127 -58.3163 | 128 -57.3584 | 129 -57.6323 | 130 -58.1389 |
| 131 -57.6651 | 132 -57.6323 | 133 -57.7969 | 134 -57.4116 | 135 -57.3696 |
| 136 -57.6362 | 137 -58.0738 | 138 -57.6615 | 139 -57.6280 | 140 -57.6682 |
| 141 -57.2951 | 142 -57.3757 | 143 -57.6315 | 144 -57.6445 | 145 -60.8684 |
| 146 -57.3151 | 147 -81.3358 |              |              |              |

E-fermi : -2.3779      XC(G=0): -2.7342      alpha+bet : -2.2521

spin component 1

k-point    1 :        0.0000    0.0000    0.0000

band No.   band energies    occupation

1        -27.1411        1.00000

2        -21.5658        1.00000

|    |          |         |
|----|----------|---------|
| 3  | -21.4693 | 1.00000 |
| 4  | -21.0967 | 1.00000 |
| 5  | -21.0660 | 1.00000 |
| 6  | -21.0122 | 1.00000 |
| 7  | -20.9765 | 1.00000 |
| 8  | -20.9745 | 1.00000 |
| 9  | -20.8889 | 1.00000 |
| 10 | -20.5549 | 1.00000 |
| 11 | -20.5007 | 1.00000 |
| 12 | -20.4095 | 1.00000 |
| 13 | -20.3958 | 1.00000 |
| 14 | -20.1237 | 1.00000 |
| 15 | -19.9737 | 1.00000 |
| 16 | -19.7005 | 1.00000 |
| 17 | -19.6247 | 1.00000 |
| 18 | -19.5971 | 1.00000 |
| 19 | -19.5814 | 1.00000 |
| 20 | -19.5265 | 1.00000 |
| 21 | -19.5247 | 1.00000 |
| 22 | -19.4965 | 1.00000 |
| 23 | -19.4789 | 1.00000 |
| 24 | -19.1093 | 1.00000 |

|    |          |         |
|----|----------|---------|
| 25 | -19.0726 | 1.00000 |
| 26 | -18.9764 | 1.00000 |
| 27 | -18.9627 | 1.00000 |
| 28 | -18.8980 | 1.00000 |
| 29 | -18.7315 | 1.00000 |
| 30 | -18.5021 | 1.00000 |
| 31 | -18.3566 | 1.00000 |
| 32 | -18.2732 | 1.00000 |
| 33 | -18.2500 | 1.00000 |
| 34 | -18.1809 | 1.00000 |
| 35 | -18.1788 | 1.00000 |
| 36 | -18.0777 | 1.00000 |
| 37 | -18.0738 | 1.00000 |
| 38 | -17.5591 | 1.00000 |
| 39 | -17.3112 | 1.00000 |
| 40 | -17.2849 | 1.00000 |
| 41 | -17.2802 | 1.00000 |
| 42 | -17.2078 | 1.00000 |
| 43 | -17.2014 | 1.00000 |
| 44 | -17.1743 | 1.00000 |
| 45 | -17.0202 | 1.00000 |
| 46 | -16.9478 | 1.00000 |

|    |          |         |
|----|----------|---------|
| 47 | -16.9302 | 1.00000 |
| 48 | -16.8910 | 1.00000 |
| 49 | -16.8892 | 1.00000 |
| 50 | -16.8479 | 1.00000 |
| 51 | -16.8395 | 1.00000 |
| 52 | -16.8183 | 1.00000 |
| 53 | -16.8164 | 1.00000 |
| 54 | -16.7273 | 1.00000 |
| 55 | -16.7240 | 1.00000 |
| 56 | -16.1747 | 1.00000 |
| 57 | -15.7274 | 1.00000 |
| 58 | -15.6899 | 1.00000 |
| 59 | -15.6580 | 1.00000 |
| 60 | -15.6343 | 1.00000 |
| 61 | -15.6141 | 1.00000 |
| 62 | -15.5516 | 1.00000 |
| 63 | -15.5478 | 1.00000 |
| 64 | -15.1724 | 1.00000 |
| 65 | -14.8081 | 1.00000 |
| 66 | -14.6058 | 1.00000 |
| 67 | -14.5761 | 1.00000 |
| 68 | -14.5328 | 1.00000 |

|    |          |         |
|----|----------|---------|
| 69 | -14.4963 | 1.00000 |
| 70 | -14.4663 | 1.00000 |
| 71 | -14.4397 | 1.00000 |
| 72 | -14.3314 | 1.00000 |
| 73 | -14.3033 | 1.00000 |
| 74 | -14.2775 | 1.00000 |
| 75 | -14.2697 | 1.00000 |
| 76 | -14.1805 | 1.00000 |
| 77 | -14.1766 | 1.00000 |
| 78 | -13.8886 | 1.00000 |
| 79 | -13.7571 | 1.00000 |
| 80 | -13.5910 | 1.00000 |
| 81 | -13.5462 | 1.00000 |
| 82 | -13.5273 | 1.00000 |
| 83 | -13.4950 | 1.00000 |
| 84 | -13.4435 | 1.00000 |
| 85 | -13.3621 | 1.00000 |
| 86 | -13.3435 | 1.00000 |
| 87 | -13.1859 | 1.00000 |
| 88 | -12.7841 | 1.00000 |
| 89 | -12.7573 | 1.00000 |
| 90 | -12.7251 | 1.00000 |

|     |          |         |
|-----|----------|---------|
| 91  | -12.6940 | 1.00000 |
| 92  | -12.6842 | 1.00000 |
| 93  | -12.6213 | 1.00000 |
| 94  | -12.4591 | 1.00000 |
| 95  | -12.4444 | 1.00000 |
| 96  | -12.3795 | 1.00000 |
| 97  | -12.3223 | 1.00000 |
| 98  | -12.2110 | 1.00000 |
| 99  | -12.2014 | 1.00000 |
| 100 | -12.1629 | 1.00000 |
| 101 | -11.9491 | 1.00000 |
| 102 | -11.6836 | 1.00000 |
| 103 | -11.6281 | 1.00000 |
| 104 | -11.6092 | 1.00000 |
| 105 | -11.5842 | 1.00000 |
| 106 | -11.1194 | 1.00000 |
| 107 | -11.0868 | 1.00000 |
| 108 | -10.8974 | 1.00000 |
| 109 | -10.8860 | 1.00000 |
| 110 | -10.8314 | 1.00000 |
| 111 | -10.7087 | 1.00000 |
| 112 | -10.6820 | 1.00000 |

|     |          |         |
|-----|----------|---------|
| 113 | -10.6616 | 1.00000 |
| 114 | -10.6443 | 1.00000 |
| 115 | -10.5875 | 1.00000 |
| 116 | -10.5791 | 1.00000 |
| 117 | -10.5692 | 1.00000 |
| 118 | -10.5654 | 1.00000 |
| 119 | -10.5243 | 1.00000 |
| 120 | -10.5233 | 1.00000 |
| 121 | -10.5085 | 1.00000 |
| 122 | -10.5008 | 1.00000 |
| 123 | -10.3763 | 1.00000 |
| 124 | -10.2967 | 1.00000 |
| 125 | -10.2562 | 1.00000 |
| 126 | -10.1859 | 1.00000 |
| 127 | -10.1849 | 1.00000 |
| 128 | -10.1297 | 1.00000 |
| 129 | -10.0638 | 1.00000 |
| 130 | -9.8921  | 1.00000 |
| 131 | -9.8657  | 1.00000 |
| 132 | -9.7957  | 1.00000 |
| 133 | -9.7842  | 1.00000 |
| 134 | -9.7647  | 1.00000 |

|     |         |         |
|-----|---------|---------|
| 135 | -9.6984 | 1.00000 |
| 136 | -9.4515 | 1.00000 |
| 137 | -9.4244 | 1.00000 |
| 138 | -9.3933 | 1.00000 |
| 139 | -9.3862 | 1.00000 |
| 140 | -9.3791 | 1.00000 |
| 141 | -9.3674 | 1.00000 |
| 142 | -9.3090 | 1.00000 |
| 143 | -9.3046 | 1.00000 |
| 144 | -9.2994 | 1.00000 |
| 145 | -9.2849 | 1.00000 |
| 146 | -9.2693 | 1.00000 |
| 147 | -9.0905 | 1.00000 |
| 148 | -9.0031 | 1.00000 |
| 149 | -8.9924 | 1.00000 |
| 150 | -8.9572 | 1.00000 |
| 151 | -8.9550 | 1.00000 |
| 152 | -8.7913 | 1.00000 |
| 153 | -8.7436 | 1.00000 |
| 154 | -8.7321 | 1.00000 |
| 155 | -8.7158 | 1.00000 |
| 156 | -8.7066 | 1.00000 |

|     |         |         |
|-----|---------|---------|
| 157 | -8.6849 | 1.00000 |
| 158 | -8.6765 | 1.00000 |
| 159 | -8.6660 | 1.00000 |
| 160 | -8.6518 | 1.00000 |
| 161 | -8.5926 | 1.00000 |
| 162 | -8.5807 | 1.00000 |
| 163 | -8.5741 | 1.00000 |
| 164 | -8.5657 | 1.00000 |
| 165 | -8.4851 | 1.00000 |
| 166 | -8.4547 | 1.00000 |
| 167 | -8.4338 | 1.00000 |
| 168 | -8.3429 | 1.00000 |
| 169 | -8.2950 | 1.00000 |
| 170 | -8.2727 | 1.00000 |
| 171 | -8.2614 | 1.00000 |
| 172 | -8.2310 | 1.00000 |
| 173 | -8.2300 | 1.00000 |
| 174 | -8.1495 | 1.00000 |
| 175 | -8.1430 | 1.00000 |
| 176 | -8.0759 | 1.00000 |
| 177 | -8.0420 | 1.00000 |
| 178 | -8.0239 | 1.00000 |

|     |         |         |
|-----|---------|---------|
| 179 | -8.0194 | 1.00000 |
| 180 | -7.9707 | 1.00000 |
| 181 | -7.9620 | 1.00000 |
| 182 | -7.9222 | 1.00000 |
| 183 | -7.8983 | 1.00000 |
| 184 | -7.8830 | 1.00000 |
| 185 | -7.8700 | 1.00000 |
| 186 | -7.7987 | 1.00000 |
| 187 | -7.7951 | 1.00000 |
| 188 | -7.7456 | 1.00000 |
| 189 | -7.7083 | 1.00000 |
| 190 | -7.6638 | 1.00000 |
| 191 | -7.5972 | 1.00000 |
| 192 | -7.5823 | 1.00000 |
| 193 | -7.5735 | 1.00000 |
| 194 | -7.5446 | 1.00000 |
| 195 | -7.4784 | 1.00000 |
| 196 | -7.4778 | 1.00000 |
| 197 | -7.4262 | 1.00000 |
| 198 | -7.3217 | 1.00000 |
| 199 | -7.2471 | 1.00000 |
| 200 | -7.1579 | 1.00000 |

|     |         |         |
|-----|---------|---------|
| 201 | -7.0643 | 1.00000 |
| 202 | -7.0398 | 1.00000 |
| 203 | -7.0256 | 1.00000 |
| 204 | -7.0109 | 1.00000 |
| 205 | -6.9941 | 1.00000 |
| 206 | -6.9872 | 1.00000 |
| 207 | -6.9730 | 1.00000 |
| 208 | -6.8641 | 1.00000 |
| 209 | -6.8184 | 1.00000 |
| 210 | -6.7994 | 1.00000 |
| 211 | -6.7908 | 1.00000 |
| 212 | -6.7297 | 1.00000 |
| 213 | -6.6850 | 1.00000 |
| 214 | -6.4681 | 1.00000 |
| 215 | -6.4225 | 1.00000 |
| 216 | -6.3936 | 1.00000 |
| 217 | -6.3888 | 1.00000 |
| 218 | -6.3715 | 1.00000 |
| 219 | -6.3697 | 1.00000 |
| 220 | -6.3144 | 1.00000 |
| 221 | -6.3047 | 1.00000 |
| 222 | -6.2343 | 1.00000 |

|     |         |         |
|-----|---------|---------|
| 223 | -6.2275 | 1.00000 |
| 224 | -6.2270 | 1.00000 |
| 225 | -6.0751 | 1.00000 |
| 226 | -6.0350 | 1.00000 |
| 227 | -5.7902 | 1.00000 |
| 228 | -5.7496 | 1.00000 |
| 229 | -5.6909 | 1.00000 |
| 230 | -5.6389 | 1.00000 |
| 231 | -5.6347 | 1.00000 |
| 232 | -5.5562 | 1.00000 |
| 233 | -5.5281 | 1.00000 |
| 234 | -5.4653 | 1.00000 |
| 235 | -5.4365 | 1.00000 |
| 236 | -5.1640 | 1.00000 |
| 237 | -5.0561 | 1.00000 |
| 238 | -5.0479 | 1.00000 |
| 239 | -5.0156 | 1.00000 |
| 240 | -4.9863 | 1.00000 |
| 241 | -4.9080 | 1.00000 |
| 242 | -4.8510 | 1.00000 |
| 243 | -4.8197 | 1.00000 |
| 244 | -4.7869 | 1.00000 |

|     |         |         |
|-----|---------|---------|
| 245 | -4.6796 | 1.00000 |
| 246 | -4.5700 | 1.00000 |
| 247 | -4.5687 | 1.00000 |
| 248 | -4.5027 | 1.00000 |
| 249 | -4.4432 | 1.00000 |
| 250 | -4.3811 | 1.00000 |
| 251 | -4.2905 | 1.00000 |
| 252 | -4.2628 | 1.00000 |
| 253 | -4.2102 | 1.00000 |
| 254 | -3.5533 | 1.00000 |
| 255 | -3.3520 | 1.00000 |
| 256 | -3.1969 | 1.00000 |
| 257 | -2.9371 | 1.00000 |
| 258 | -2.8457 | 1.00000 |
| 259 | -2.8210 | 1.00000 |
| 260 | -2.6035 | 1.00000 |
| 261 | -1.9064 | 0.00000 |
| 262 | -1.7648 | 0.00000 |
| 263 | -1.7159 | 0.00000 |
| 264 | -1.3409 | 0.00000 |
| 265 | -1.2829 | 0.00000 |
| 266 | -1.1746 | 0.00000 |

|     |         |         |
|-----|---------|---------|
| 267 | -0.7386 | 0.00000 |
| 268 | -0.5821 | 0.00000 |
| 269 | -0.4977 | 0.00000 |
| 270 | -0.3054 | 0.00000 |
| 271 | -0.3032 | 0.00000 |
| 272 | -0.2875 | 0.00000 |
| 273 | -0.1802 | 0.00000 |
| 274 | -0.0548 | 0.00000 |
| 275 | -0.0464 | 0.00000 |
| 276 | -0.0076 | 0.00000 |
| 277 | 0.0374  | 0.00000 |
| 278 | 0.0878  | 0.00000 |
| 279 | 0.1754  | 0.00000 |
| 280 | 0.2230  | 0.00000 |
| 281 | 0.2506  | 0.00000 |
| 282 | 0.4225  | 0.00000 |
| 283 | 0.4509  | 0.00000 |
| 284 | 0.4842  | 0.00000 |
| 285 | 0.5982  | 0.00000 |
| 286 | 0.6822  | 0.00000 |
| 287 | 0.8193  | 0.00000 |
| 288 | 0.8749  | 0.00000 |

|     |        |         |
|-----|--------|---------|
| 289 | 1.0476 | 0.00000 |
| 290 | 1.0879 | 0.00000 |
| 291 | 1.1247 | 0.00000 |
| 292 | 1.1645 | 0.00000 |
| 293 | 1.2239 | 0.00000 |
| 294 | 1.2455 | 0.00000 |
| 295 | 1.2889 | 0.00000 |
| 296 | 1.3147 | 0.00000 |
| 297 | 1.3474 | 0.00000 |
| 298 | 1.4135 | 0.00000 |
| 299 | 1.4683 | 0.00000 |
| 300 | 1.4830 | 0.00000 |
| 301 | 1.5551 | 0.00000 |
| 302 | 1.5878 | 0.00000 |
| 303 | 1.6288 | 0.00000 |
| 304 | 1.6788 | 0.00000 |
| 305 | 1.7518 | 0.00000 |
| 306 | 1.7643 | 0.00000 |
| 307 | 1.8743 | 0.00000 |
| 308 | 1.8984 | 0.00000 |
| 309 | 1.9072 | 0.00000 |
| 310 | 1.9172 | 0.00000 |

|     |        |         |
|-----|--------|---------|
| 311 | 2.1221 | 0.00000 |
| 312 | 2.1859 | 0.00000 |
| 313 | 2.2095 | 0.00000 |
| 314 | 2.2378 | 0.00000 |
| 315 | 2.2771 | 0.00000 |
| 316 | 2.2922 | 0.00000 |
| 317 | 2.3318 | 0.00000 |
| 318 | 2.3547 | 0.00000 |
| 319 | 2.3735 | 0.00000 |
| 320 | 2.3995 | 0.00000 |
| 321 | 2.4239 | 0.00000 |
| 322 | 2.4308 | 0.00000 |
| 323 | 2.4448 | 0.00000 |
| 324 | 2.4534 | 0.00000 |
| 325 | 2.4626 | 0.00000 |
| 326 | 2.5224 | 0.00000 |
| 327 | 2.5372 | 0.00000 |
| 328 | 2.7012 | 0.00000 |
| 329 | 2.7287 | 0.00000 |
| 330 | 2.7542 | 0.00000 |
| 331 | 2.7574 | 0.00000 |
| 332 | 2.7652 | 0.00000 |

|     |        |         |
|-----|--------|---------|
| 333 | 2.8184 | 0.00000 |
| 334 | 2.8361 | 0.00000 |
| 335 | 2.8580 | 0.00000 |
| 336 | 2.8914 | 0.00000 |
| 337 | 2.9250 | 0.00000 |
| 338 | 2.9476 | 0.00000 |
| 339 | 2.9793 | 0.00000 |
| 340 | 3.0059 | 0.00000 |
| 341 | 3.0347 | 0.00000 |
| 342 | 3.0461 | 0.00000 |
| 343 | 3.0664 | 0.00000 |
| 344 | 3.0858 | 0.00000 |
| 345 | 3.1496 | 0.00000 |
| 346 | 3.1634 | 0.00000 |
| 347 | 3.1808 | 0.00000 |
| 348 | 3.1917 | 0.00000 |
| 349 | 3.3010 | 0.00000 |
| 350 | 3.3222 | 0.00000 |
| 351 | 3.3518 | 0.00000 |
| 352 | 3.3669 | 0.00000 |
| 353 | 3.3898 | 0.00000 |
| 354 | 3.4314 | 0.00000 |

|     |        |         |
|-----|--------|---------|
| 355 | 3.4760 | 0.00000 |
| 356 | 3.4858 | 0.00000 |
| 357 | 3.4876 | 0.00000 |
| 358 | 3.5004 | 0.00000 |
| 359 | 3.6340 | 0.00000 |
| 360 | 3.6732 | 0.00000 |
| 361 | 3.6864 | 0.00000 |
| 362 | 3.7320 | 0.00000 |
| 363 | 3.7531 | 0.00000 |
| 364 | 3.7598 | 0.00000 |
| 365 | 3.7727 | 0.00000 |
| 366 | 3.7947 | 0.00000 |
| 367 | 3.8131 | 0.00000 |
| 368 | 3.8351 | 0.00000 |
| 369 | 3.8392 | 0.00000 |
| 370 | 3.8529 | 0.00000 |
| 371 | 3.8774 | 0.00000 |
| 372 | 3.8847 | 0.00000 |
| 373 | 3.9109 | 0.00000 |
| 374 | 3.9249 | 0.00000 |
| 375 | 3.9353 | 0.00000 |
| 376 | 3.9581 | 0.00000 |

|     |        |         |
|-----|--------|---------|
| 377 | 3.9730 | 0.00000 |
| 378 | 3.9834 | 0.00000 |
| 379 | 4.0164 | 0.00000 |
| 380 | 4.0701 | 0.00000 |
| 381 | 4.1643 | 0.00000 |
| 382 | 4.2464 | 0.00000 |
| 383 | 4.2574 | 0.00000 |
| 384 | 4.2584 | 0.00000 |
| 385 | 4.2853 | 0.00000 |
| 386 | 4.3131 | 0.00000 |
| 387 | 4.3277 | 0.00000 |
| 388 | 4.3413 | 0.00000 |
| 389 | 4.3718 | 0.00000 |
| 390 | 4.3818 | 0.00000 |
| 391 | 4.4175 | 0.00000 |
| 392 | 4.4447 | 0.00000 |
| 393 | 4.4687 | 0.00000 |
| 394 | 4.4801 | 0.00000 |
| 395 | 4.4867 | 0.00000 |
| 396 | 4.4964 | 0.00000 |
| 397 | 4.5169 | 0.00000 |
| 398 | 4.5511 | 0.00000 |

|     |        |         |
|-----|--------|---------|
| 399 | 4.5911 | 0.00000 |
| 400 | 4.6078 | 0.00000 |
| 401 | 4.6277 | 0.00000 |
| 402 | 4.6430 | 0.00000 |
| 403 | 4.6570 | 0.00000 |
| 404 | 4.6801 | 0.00000 |
| 405 | 4.7044 | 0.00000 |
| 406 | 4.7320 | 0.00000 |
| 407 | 4.7465 | 0.00000 |
| 408 | 4.7670 | 0.00000 |
| 409 | 4.7837 | 0.00000 |
| 410 | 4.7843 | 0.00000 |
| 411 | 4.7979 | 0.00000 |
| 412 | 4.8283 | 0.00000 |
| 413 | 4.8641 | 0.00000 |
| 414 | 4.8730 | 0.00000 |
| 415 | 4.8984 | 0.00000 |
| 416 | 4.9314 | 0.00000 |
| 417 | 4.9839 | 0.00000 |
| 418 | 5.0047 | 0.00000 |
| 419 | 5.0109 | 0.00000 |
| 420 | 5.0353 | 0.00000 |

|     |        |         |
|-----|--------|---------|
| 421 | 5.0393 | 0.00000 |
| 422 | 5.0660 | 0.00000 |
| 423 | 5.0819 | 0.00000 |
| 424 | 5.1138 | 0.00000 |
| 425 | 5.1178 | 0.00000 |
| 426 | 5.1371 | 0.00000 |
| 427 | 5.1409 | 0.00000 |
| 428 | 5.1551 | 0.00000 |
| 429 | 5.1754 | 0.00000 |
| 430 | 5.1853 | 0.00000 |
| 431 | 5.1884 | 0.00000 |
| 432 | 5.2148 | 0.00000 |
| 433 | 5.2362 | 0.00000 |
| 434 | 5.2403 | 0.00000 |
| 435 | 5.2558 | 0.00000 |
| 436 | 5.2904 | 0.00000 |
| 437 | 5.2965 | 0.00000 |
| 438 | 5.3097 | 0.00000 |
| 439 | 5.3320 | 0.00000 |
| 440 | 5.3497 | 0.00000 |
| 441 | 5.3675 | 0.00000 |
| 442 | 5.3748 | 0.00000 |

|     |        |         |
|-----|--------|---------|
| 443 | 5.3940 | 0.00000 |
| 444 | 5.4214 | 0.00000 |
| 445 | 5.4537 | 0.00000 |
| 446 | 5.4648 | 0.00000 |
| 447 | 5.4820 | 0.00000 |
| 448 | 5.4943 | 0.00000 |
| 449 | 5.5207 | 0.00000 |
| 450 | 5.5511 | 0.00000 |
| 451 | 5.5690 | 0.00000 |
| 452 | 5.5759 | 0.00000 |
| 453 | 5.5955 | 0.00000 |
| 454 | 5.6168 | 0.00000 |
| 455 | 5.6586 | 0.00000 |
| 456 | 5.6823 | 0.00000 |
| 457 | 5.7099 | 0.00000 |
| 458 | 5.7229 | 0.00000 |
| 459 | 5.7436 | 0.00000 |
| 460 | 5.7574 | 0.00000 |
| 461 | 5.7821 | 0.00000 |
| 462 | 5.7904 | 0.00000 |
| 463 | 5.7957 | 0.00000 |
| 464 | 5.8018 | 0.00000 |

|     |        |         |
|-----|--------|---------|
| 465 | 5.8074 | 0.00000 |
| 466 | 5.8235 | 0.00000 |
| 467 | 5.8437 | 0.00000 |
| 468 | 5.8540 | 0.00000 |
| 469 | 5.8737 | 0.00000 |
| 470 | 5.8822 | 0.00000 |
| 471 | 5.8870 | 0.00000 |
| 472 | 5.9104 | 0.00000 |
| 473 | 5.9149 | 0.00000 |
| 474 | 5.9414 | 0.00000 |
| 475 | 5.9478 | 0.00000 |
| 476 | 5.9678 | 0.00000 |
| 477 | 5.9730 | 0.00000 |
| 478 | 5.9895 | 0.00000 |
| 479 | 6.0070 | 0.00000 |
| 480 | 6.0480 | 0.00000 |

spin component 2

k-point 1 : 0.0000 0.0000 0.0000

band No. band energies occupation

1 -27.1345 1.00000

|    |          |         |
|----|----------|---------|
| 2  | -21.5646 | 1.00000 |
| 3  | -21.4677 | 1.00000 |
| 4  | -21.0948 | 1.00000 |
| 5  | -21.0651 | 1.00000 |
| 6  | -21.0095 | 1.00000 |
| 7  | -20.9751 | 1.00000 |
| 8  | -20.9726 | 1.00000 |
| 9  | -20.8783 | 1.00000 |
| 10 | -20.5520 | 1.00000 |
| 11 | -20.4972 | 1.00000 |
| 12 | -20.3984 | 1.00000 |
| 13 | -20.3862 | 1.00000 |
| 14 | -20.1195 | 1.00000 |
| 15 | -19.9506 | 1.00000 |
| 16 | -19.6977 | 1.00000 |
| 17 | -19.6235 | 1.00000 |
| 18 | -19.5949 | 1.00000 |
| 19 | -19.5750 | 1.00000 |
| 20 | -19.5252 | 1.00000 |
| 21 | -19.5229 | 1.00000 |
| 22 | -19.4739 | 1.00000 |
| 23 | -19.4594 | 1.00000 |

|    |          |         |
|----|----------|---------|
| 24 | -19.1068 | 1.00000 |
| 25 | -19.0702 | 1.00000 |
| 26 | -18.9664 | 1.00000 |
| 27 | -18.9532 | 1.00000 |
| 28 | -18.8932 | 1.00000 |
| 29 | -18.7019 | 1.00000 |
| 30 | -18.4990 | 1.00000 |
| 31 | -18.3495 | 1.00000 |
| 32 | -18.2451 | 1.00000 |
| 33 | -18.2248 | 1.00000 |
| 34 | -18.1757 | 1.00000 |
| 35 | -18.1734 | 1.00000 |
| 36 | -18.0576 | 1.00000 |
| 37 | -18.0543 | 1.00000 |
| 38 | -17.5557 | 1.00000 |
| 39 | -17.2947 | 1.00000 |
| 40 | -17.2843 | 1.00000 |
| 41 | -17.2711 | 1.00000 |
| 42 | -17.2055 | 1.00000 |
| 43 | -17.2044 | 1.00000 |
| 44 | -17.1713 | 1.00000 |
| 45 | -17.0162 | 1.00000 |

|    |          |         |
|----|----------|---------|
| 46 | -16.9388 | 1.00000 |
| 47 | -16.9197 | 1.00000 |
| 48 | -16.8684 | 1.00000 |
| 49 | -16.8674 | 1.00000 |
| 50 | -16.8271 | 1.00000 |
| 51 | -16.8204 | 1.00000 |
| 52 | -16.8153 | 1.00000 |
| 53 | -16.8130 | 1.00000 |
| 54 | -16.7289 | 1.00000 |
| 55 | -16.7230 | 1.00000 |
| 56 | -16.1720 | 1.00000 |
| 57 | -15.7267 | 1.00000 |
| 58 | -15.6552 | 1.00000 |
| 59 | -15.6405 | 1.00000 |
| 60 | -15.6188 | 1.00000 |
| 61 | -15.5645 | 1.00000 |
| 62 | -15.5257 | 1.00000 |
| 63 | -15.5230 | 1.00000 |
| 64 | -15.1687 | 1.00000 |
| 65 | -14.8059 | 1.00000 |
| 66 | -14.6036 | 1.00000 |
| 67 | -14.5585 | 1.00000 |

|    |          |         |
|----|----------|---------|
| 68 | -14.4982 | 1.00000 |
| 69 | -14.4964 | 1.00000 |
| 70 | -14.4623 | 1.00000 |
| 71 | -14.4354 | 1.00000 |
| 72 | -14.3279 | 1.00000 |
| 73 | -14.2955 | 1.00000 |
| 74 | -14.2659 | 1.00000 |
| 75 | -14.2616 | 1.00000 |
| 76 | -14.1624 | 1.00000 |
| 77 | -14.1590 | 1.00000 |
| 78 | -13.8878 | 1.00000 |
| 79 | -13.7547 | 1.00000 |
| 80 | -13.5883 | 1.00000 |
| 81 | -13.5356 | 1.00000 |
| 82 | -13.5162 | 1.00000 |
| 83 | -13.4915 | 1.00000 |
| 84 | -13.4418 | 1.00000 |
| 85 | -13.3416 | 1.00000 |
| 86 | -13.3389 | 1.00000 |
| 87 | -13.1843 | 1.00000 |
| 88 | -12.7776 | 1.00000 |
| 89 | -12.7478 | 1.00000 |

|     |          |         |
|-----|----------|---------|
| 90  | -12.7161 | 1.00000 |
| 91  | -12.6755 | 1.00000 |
| 92  | -12.6685 | 1.00000 |
| 93  | -12.6191 | 1.00000 |
| 94  | -12.4465 | 1.00000 |
| 95  | -12.4295 | 1.00000 |
| 96  | -12.3760 | 1.00000 |
| 97  | -12.3214 | 1.00000 |
| 98  | -12.2064 | 1.00000 |
| 99  | -12.1962 | 1.00000 |
| 100 | -12.1614 | 1.00000 |
| 101 | -11.9463 | 1.00000 |
| 102 | -11.6807 | 1.00000 |
| 103 | -11.6134 | 1.00000 |
| 104 | -11.5900 | 1.00000 |
| 105 | -11.5751 | 1.00000 |
| 106 | -11.1167 | 1.00000 |
| 107 | -11.0846 | 1.00000 |
| 108 | -10.8884 | 1.00000 |
| 109 | -10.8755 | 1.00000 |
| 110 | -10.8284 | 1.00000 |
| 111 | -10.7027 | 1.00000 |

|     |          |         |
|-----|----------|---------|
| 112 | -10.6809 | 1.00000 |
| 113 | -10.6585 | 1.00000 |
| 114 | -10.6394 | 1.00000 |
| 115 | -10.5794 | 1.00000 |
| 116 | -10.5719 | 1.00000 |
| 117 | -10.5665 | 1.00000 |
| 118 | -10.5625 | 1.00000 |
| 119 | -10.5137 | 1.00000 |
| 120 | -10.5127 | 1.00000 |
| 121 | -10.4994 | 1.00000 |
| 122 | -10.4948 | 1.00000 |
| 123 | -10.3755 | 1.00000 |
| 124 | -10.2957 | 1.00000 |
| 125 | -10.2549 | 1.00000 |
| 126 | -10.1824 | 1.00000 |
| 127 | -10.1813 | 1.00000 |
| 128 | -10.1144 | 1.00000 |
| 129 | -10.0613 | 1.00000 |
| 130 | -9.8893  | 1.00000 |
| 131 | -9.8639  | 1.00000 |
| 132 | -9.7891  | 1.00000 |
| 133 | -9.7751  | 1.00000 |

|     |         |         |
|-----|---------|---------|
| 134 | -9.7606 | 1.00000 |
| 135 | -9.6965 | 1.00000 |
| 136 | -9.4499 | 1.00000 |
| 137 | -9.4209 | 1.00000 |
| 138 | -9.3819 | 1.00000 |
| 139 | -9.3776 | 1.00000 |
| 140 | -9.3720 | 1.00000 |
| 141 | -9.3576 | 1.00000 |
| 142 | -9.3067 | 1.00000 |
| 143 | -9.3022 | 1.00000 |
| 144 | -9.2978 | 1.00000 |
| 145 | -9.2849 | 1.00000 |
| 146 | -9.2464 | 1.00000 |
| 147 | -9.0893 | 1.00000 |
| 148 | -8.9996 | 1.00000 |
| 149 | -8.9885 | 1.00000 |
| 150 | -8.9431 | 1.00000 |
| 151 | -8.9406 | 1.00000 |
| 152 | -8.7888 | 1.00000 |
| 153 | -8.7355 | 1.00000 |
| 154 | -8.7298 | 1.00000 |
| 155 | -8.7104 | 1.00000 |

|     |         |         |
|-----|---------|---------|
| 156 | -8.7036 | 1.00000 |
| 157 | -8.6679 | 1.00000 |
| 158 | -8.6615 | 1.00000 |
| 159 | -8.6543 | 1.00000 |
| 160 | -8.6511 | 1.00000 |
| 161 | -8.5755 | 1.00000 |
| 162 | -8.5690 | 1.00000 |
| 163 | -8.5642 | 1.00000 |
| 164 | -8.5470 | 1.00000 |
| 165 | -8.4847 | 1.00000 |
| 166 | -8.4540 | 1.00000 |
| 167 | -8.4322 | 1.00000 |
| 168 | -8.3401 | 1.00000 |
| 169 | -8.2917 | 1.00000 |
| 170 | -8.2712 | 1.00000 |
| 171 | -8.2310 | 1.00000 |
| 172 | -8.2273 | 1.00000 |
| 173 | -8.2253 | 1.00000 |
| 174 | -8.1394 | 1.00000 |
| 175 | -8.1318 | 1.00000 |
| 176 | -8.0726 | 1.00000 |
| 177 | -8.0398 | 1.00000 |

|     |         |         |
|-----|---------|---------|
| 178 | -8.0109 | 1.00000 |
| 179 | -8.0052 | 1.00000 |
| 180 | -7.9660 | 1.00000 |
| 181 | -7.9571 | 1.00000 |
| 182 | -7.9181 | 1.00000 |
| 183 | -7.8886 | 1.00000 |
| 184 | -7.8691 | 1.00000 |
| 185 | -7.8612 | 1.00000 |
| 186 | -7.7898 | 1.00000 |
| 187 | -7.7858 | 1.00000 |
| 188 | -7.7361 | 1.00000 |
| 189 | -7.6767 | 1.00000 |
| 190 | -7.6339 | 1.00000 |
| 191 | -7.5950 | 1.00000 |
| 192 | -7.5745 | 1.00000 |
| 193 | -7.5523 | 1.00000 |
| 194 | -7.5374 | 1.00000 |
| 195 | -7.4703 | 1.00000 |
| 196 | -7.4702 | 1.00000 |
| 197 | -7.4251 | 1.00000 |
| 198 | -7.3208 | 1.00000 |
| 199 | -7.2338 | 1.00000 |

|     |         |         |
|-----|---------|---------|
| 200 | -7.1549 | 1.00000 |
| 201 | -7.0530 | 1.00000 |
| 202 | -7.0341 | 1.00000 |
| 203 | -7.0137 | 1.00000 |
| 204 | -6.9831 | 1.00000 |
| 205 | -6.9750 | 1.00000 |
| 206 | -6.9698 | 1.00000 |
| 207 | -6.9386 | 1.00000 |
| 208 | -6.8604 | 1.00000 |
| 209 | -6.8141 | 1.00000 |
| 210 | -6.7932 | 1.00000 |
| 211 | -6.7856 | 1.00000 |
| 212 | -6.7230 | 1.00000 |
| 213 | -6.6756 | 1.00000 |
| 214 | -6.4648 | 1.00000 |
| 215 | -6.3926 | 1.00000 |
| 216 | -6.3804 | 1.00000 |
| 217 | -6.3761 | 1.00000 |
| 218 | -6.3604 | 1.00000 |
| 219 | -6.3360 | 1.00000 |
| 220 | -6.3007 | 1.00000 |
| 221 | -6.2732 | 1.00000 |

|     |         |         |
|-----|---------|---------|
| 222 | -6.2272 | 1.00000 |
| 223 | -6.2258 | 1.00000 |
| 224 | -6.2199 | 1.00000 |
| 225 | -6.0445 | 1.00000 |
| 226 | -6.0064 | 1.00000 |
| 227 | -5.7540 | 1.00000 |
| 228 | -5.7089 | 1.00000 |
| 229 | -5.6893 | 1.00000 |
| 230 | -5.6334 | 1.00000 |
| 231 | -5.6203 | 1.00000 |
| 232 | -5.5415 | 1.00000 |
| 233 | -5.5209 | 1.00000 |
| 234 | -5.4388 | 1.00000 |
| 235 | -5.4091 | 1.00000 |
| 236 | -5.1420 | 1.00000 |
| 237 | -5.0576 | 1.00000 |
| 238 | -5.0236 | 1.00000 |
| 239 | -5.0198 | 1.00000 |
| 240 | -4.9567 | 1.00000 |
| 241 | -4.8752 | 1.00000 |
| 242 | -4.8519 | 1.00000 |
| 243 | -4.7999 | 1.00000 |

|     |         |         |
|-----|---------|---------|
| 244 | -4.7750 | 1.00000 |
| 245 | -4.6491 | 1.00000 |
| 246 | -4.5762 | 1.00000 |
| 247 | -4.5731 | 1.00000 |
| 248 | -4.4729 | 1.00000 |
| 249 | -4.4189 | 1.00000 |
| 250 | -4.3922 | 1.00000 |
| 251 | -4.2943 | 1.00000 |
| 252 | -4.2240 | 1.00000 |
| 253 | -4.1728 | 1.00000 |
| 254 | -3.5267 | 1.00000 |
| 255 | -3.3065 | 1.00000 |
| 256 | -3.1374 | 1.00000 |
| 257 | -2.9421 | 1.00000 |
| 258 | -2.7966 | 1.00000 |
| 259 | -2.7372 | 1.00000 |
| 260 | -2.0577 | 0.00000 |
| 261 | -1.9124 | 0.00000 |
| 262 | -1.7196 | 0.00000 |
| 263 | -1.6758 | 0.00000 |
| 264 | -1.2828 | 0.00000 |
| 265 | -1.2573 | 0.00000 |

|     |         |         |
|-----|---------|---------|
| 266 | -1.1467 | 0.00000 |
| 267 | -0.7173 | 0.00000 |
| 268 | -0.5814 | 0.00000 |
| 269 | -0.5053 | 0.00000 |
| 270 | -0.2782 | 0.00000 |
| 271 | -0.2751 | 0.00000 |
| 272 | -0.2573 | 0.00000 |
| 273 | -0.1536 | 0.00000 |
| 274 | -0.0544 | 0.00000 |
| 275 | -0.0453 | 0.00000 |
| 276 | 0.0162  | 0.00000 |
| 277 | 0.0425  | 0.00000 |
| 278 | 0.0827  | 0.00000 |
| 279 | 0.2105  | 0.00000 |
| 280 | 0.2580  | 0.00000 |
| 281 | 0.2822  | 0.00000 |
| 282 | 0.4367  | 0.00000 |
| 283 | 0.4548  | 0.00000 |
| 284 | 0.4853  | 0.00000 |
| 285 | 0.6031  | 0.00000 |
| 286 | 0.7025  | 0.00000 |
| 287 | 0.8221  | 0.00000 |

|     |        |         |
|-----|--------|---------|
| 288 | 0.8819 | 0.00000 |
| 289 | 1.0559 | 0.00000 |
| 290 | 1.1072 | 0.00000 |
| 291 | 1.1453 | 0.00000 |
| 292 | 1.1795 | 0.00000 |
| 293 | 1.2327 | 0.00000 |
| 294 | 1.2512 | 0.00000 |
| 295 | 1.3101 | 0.00000 |
| 296 | 1.3205 | 0.00000 |
| 297 | 1.3612 | 0.00000 |
| 298 | 1.4323 | 0.00000 |
| 299 | 1.4798 | 0.00000 |
| 300 | 1.5016 | 0.00000 |
| 301 | 1.5790 | 0.00000 |
| 302 | 1.6041 | 0.00000 |
| 303 | 1.6577 | 0.00000 |
| 304 | 1.6875 | 0.00000 |
| 305 | 1.7591 | 0.00000 |
| 306 | 1.7746 | 0.00000 |
| 307 | 1.8776 | 0.00000 |
| 308 | 1.9025 | 0.00000 |
| 309 | 1.9102 | 0.00000 |

|     |        |         |
|-----|--------|---------|
| 310 | 1.9272 | 0.00000 |
| 311 | 2.1385 | 0.00000 |
| 312 | 2.1973 | 0.00000 |
| 313 | 2.2212 | 0.00000 |
| 314 | 2.2562 | 0.00000 |
| 315 | 2.2907 | 0.00000 |
| 316 | 2.2969 | 0.00000 |
| 317 | 2.3371 | 0.00000 |
| 318 | 2.3622 | 0.00000 |
| 319 | 2.3843 | 0.00000 |
| 320 | 2.4096 | 0.00000 |
| 321 | 2.4303 | 0.00000 |
| 322 | 2.4361 | 0.00000 |
| 323 | 2.4557 | 0.00000 |
| 324 | 2.4588 | 0.00000 |
| 325 | 2.4697 | 0.00000 |
| 326 | 2.5249 | 0.00000 |
| 327 | 2.5430 | 0.00000 |
| 328 | 2.7065 | 0.00000 |
| 329 | 2.7346 | 0.00000 |
| 330 | 2.7544 | 0.00000 |
| 331 | 2.7600 | 0.00000 |

|     |        |         |
|-----|--------|---------|
| 332 | 2.7736 | 0.00000 |
| 333 | 2.8327 | 0.00000 |
| 334 | 2.8490 | 0.00000 |
| 335 | 2.8714 | 0.00000 |
| 336 | 2.9027 | 0.00000 |
| 337 | 2.9334 | 0.00000 |
| 338 | 2.9571 | 0.00000 |
| 339 | 2.9841 | 0.00000 |
| 340 | 3.0075 | 0.00000 |
| 341 | 3.0387 | 0.00000 |
| 342 | 3.0527 | 0.00000 |
| 343 | 3.0720 | 0.00000 |
| 344 | 3.0932 | 0.00000 |
| 345 | 3.1522 | 0.00000 |
| 346 | 3.1725 | 0.00000 |
| 347 | 3.1892 | 0.00000 |
| 348 | 3.1998 | 0.00000 |
| 349 | 3.3067 | 0.00000 |
| 350 | 3.3268 | 0.00000 |
| 351 | 3.3603 | 0.00000 |
| 352 | 3.3704 | 0.00000 |
| 353 | 3.3930 | 0.00000 |

|     |        |         |
|-----|--------|---------|
| 354 | 3.4369 | 0.00000 |
| 355 | 3.4813 | 0.00000 |
| 356 | 3.4920 | 0.00000 |
| 357 | 3.4967 | 0.00000 |
| 358 | 3.5070 | 0.00000 |
| 359 | 3.6390 | 0.00000 |
| 360 | 3.6771 | 0.00000 |
| 361 | 3.6988 | 0.00000 |
| 362 | 3.7380 | 0.00000 |
| 363 | 3.7567 | 0.00000 |
| 364 | 3.7616 | 0.00000 |
| 365 | 3.7777 | 0.00000 |
| 366 | 3.7995 | 0.00000 |
| 367 | 3.8160 | 0.00000 |
| 368 | 3.8422 | 0.00000 |
| 369 | 3.8480 | 0.00000 |
| 370 | 3.8672 | 0.00000 |
| 371 | 3.8814 | 0.00000 |
| 372 | 3.8942 | 0.00000 |
| 373 | 3.9219 | 0.00000 |
| 374 | 3.9367 | 0.00000 |
| 375 | 3.9498 | 0.00000 |

|     |        |         |
|-----|--------|---------|
| 376 | 3.9599 | 0.00000 |
| 377 | 3.9828 | 0.00000 |
| 378 | 3.9864 | 0.00000 |
| 379 | 4.0223 | 0.00000 |
| 380 | 4.0793 | 0.00000 |
| 381 | 4.1708 | 0.00000 |
| 382 | 4.2588 | 0.00000 |
| 383 | 4.2622 | 0.00000 |
| 384 | 4.2691 | 0.00000 |
| 385 | 4.2929 | 0.00000 |
| 386 | 4.3213 | 0.00000 |
| 387 | 4.3344 | 0.00000 |
| 388 | 4.3505 | 0.00000 |
| 389 | 4.3818 | 0.00000 |
| 390 | 4.3867 | 0.00000 |
| 391 | 4.4233 | 0.00000 |
| 392 | 4.4487 | 0.00000 |
| 393 | 4.4737 | 0.00000 |
| 394 | 4.4831 | 0.00000 |
| 395 | 4.4935 | 0.00000 |
| 396 | 4.4991 | 0.00000 |
| 397 | 4.5202 | 0.00000 |

|     |        |         |
|-----|--------|---------|
| 398 | 4.5556 | 0.00000 |
| 399 | 4.5942 | 0.00000 |
| 400 | 4.6106 | 0.00000 |
| 401 | 4.6294 | 0.00000 |
| 402 | 4.6464 | 0.00000 |
| 403 | 4.6600 | 0.00000 |
| 404 | 4.6859 | 0.00000 |
| 405 | 4.7092 | 0.00000 |
| 406 | 4.7378 | 0.00000 |
| 407 | 4.7514 | 0.00000 |
| 408 | 4.7705 | 0.00000 |
| 409 | 4.7874 | 0.00000 |
| 410 | 4.7899 | 0.00000 |
| 411 | 4.8034 | 0.00000 |
| 412 | 4.8331 | 0.00000 |
| 413 | 4.8694 | 0.00000 |
| 414 | 4.8856 | 0.00000 |
| 415 | 4.9038 | 0.00000 |
| 416 | 4.9421 | 0.00000 |
| 417 | 4.9937 | 0.00000 |
| 418 | 5.0101 | 0.00000 |
| 419 | 5.0134 | 0.00000 |

|     |        |         |
|-----|--------|---------|
| 420 | 5.0388 | 0.00000 |
| 421 | 5.0444 | 0.00000 |
| 422 | 5.0701 | 0.00000 |
| 423 | 5.0862 | 0.00000 |
| 424 | 5.1172 | 0.00000 |
| 425 | 5.1219 | 0.00000 |
| 426 | 5.1411 | 0.00000 |
| 427 | 5.1443 | 0.00000 |
| 428 | 5.1713 | 0.00000 |
| 429 | 5.1801 | 0.00000 |
| 430 | 5.1893 | 0.00000 |
| 431 | 5.1932 | 0.00000 |
| 432 | 5.2198 | 0.00000 |
| 433 | 5.2386 | 0.00000 |
| 434 | 5.2435 | 0.00000 |
| 435 | 5.2615 | 0.00000 |
| 436 | 5.2990 | 0.00000 |
| 437 | 5.3038 | 0.00000 |
| 438 | 5.3127 | 0.00000 |
| 439 | 5.3364 | 0.00000 |
| 440 | 5.3536 | 0.00000 |
| 441 | 5.3715 | 0.00000 |

|     |        |         |
|-----|--------|---------|
| 442 | 5.3823 | 0.00000 |
| 443 | 5.3966 | 0.00000 |
| 444 | 5.4297 | 0.00000 |
| 445 | 5.4599 | 0.00000 |
| 446 | 5.4715 | 0.00000 |
| 447 | 5.4876 | 0.00000 |
| 448 | 5.4988 | 0.00000 |
| 449 | 5.5276 | 0.00000 |
| 450 | 5.5687 | 0.00000 |
| 451 | 5.5750 | 0.00000 |
| 452 | 5.5956 | 0.00000 |
| 453 | 5.6076 | 0.00000 |
| 454 | 5.6266 | 0.00000 |
| 455 | 5.6710 | 0.00000 |
| 456 | 5.6930 | 0.00000 |
| 457 | 5.7192 | 0.00000 |
| 458 | 5.7274 | 0.00000 |
| 459 | 5.7478 | 0.00000 |
| 460 | 5.7624 | 0.00000 |
| 461 | 5.7901 | 0.00000 |
| 462 | 5.7935 | 0.00000 |
| 463 | 5.7987 | 0.00000 |

|     |        |         |
|-----|--------|---------|
| 464 | 5.8046 | 0.00000 |
| 465 | 5.8208 | 0.00000 |
| 466 | 5.8257 | 0.00000 |
| 467 | 5.8556 | 0.00000 |
| 468 | 5.8611 | 0.00000 |
| 469 | 5.8838 | 0.00000 |
| 470 | 5.8875 | 0.00000 |
| 471 | 5.8921 | 0.00000 |
| 472 | 5.9097 | 0.00000 |
| 473 | 5.9215 | 0.00000 |
| 474 | 5.9485 | 0.00000 |
| 475 | 5.9534 | 0.00000 |
| 476 | 5.9699 | 0.00000 |
| 477 | 5.9765 | 0.00000 |
| 478 | 5.9893 | 0.00000 |
| 479 | 6.0122 | 0.00000 |
| 480 | 6.0414 | 0.00000 |

---

soft charge-density along one line, spin component

1

0 1 2 3 4 5 6 7

8 9

total charge-density along one line

soft charge-density along one line, spin component

2

0 1 2 3 4 5 6 7

8 9

total charge-density along one line

pseudopotential strength for first ion, spin component:

1

-2.331 -4.014 -0.002 0.000 0.000

-4.014 -6.828 -0.006 0.000 -0.000

-0.002 -0.006 -0.336 -0.000 0.000

0.000 0.000 -0.000 -0.341 -0.000

0.000 -0.000 0.000 -0.000 -0.341

pseudopotential strength for first ion, spin component:

2

-2.331 -4.014 -0.002 0.000 0.000

-4.014 -6.828 -0.006 0.000 -0.000

-0.002 -0.006 -0.336 -0.000 0.000

0.000 0.000 -0.000 -0.341 -0.000

0.000 -0.000 0.000 -0.000 -0.341

total augmentation occupancy for first ion, spin component: 1

|        |        |        |        |        |
|--------|--------|--------|--------|--------|
| 3.579  | -0.646 | 0.444  | -0.034 | -0.000 |
| -0.646 | 0.130  | -0.082 | 0.006  | 0.000  |
| 0.444  | -0.082 | 0.056  | -0.003 | -0.000 |
| -0.034 | 0.006  | -0.003 | 0.011  | 0.000  |
| -0.000 | 0.000  | -0.000 | 0.000  | 0.007  |

total augmentation occupancy for first ion, spin component: 2

|        |        |        |        |        |
|--------|--------|--------|--------|--------|
| -0.000 | 0.000  | -0.000 | 0.000  | 0.000  |
| 0.000  | -0.000 | 0.000  | -0.000 | -0.000 |
| -0.000 | 0.000  | -0.000 | -0.000 | -0.000 |
| 0.000  | -0.000 | -0.000 | -0.000 | -0.000 |
| 0.000  | -0.000 | -0.000 | -0.000 | -0.000 |

----- aborting loop because EDIFF is reached -----

total charge

| # of ion | s     | p     | d     | tot   |
|----------|-------|-------|-------|-------|
| 1        | 0.646 | 0.043 | 0.000 | 0.690 |
| 2        | 0.646 | 0.043 | 0.000 | 0.690 |
| 3        | 0.646 | 0.043 | 0.000 | 0.690 |
| 4        | 0.646 | 0.043 | 0.000 | 0.690 |
| 5        | 0.646 | 0.043 | 0.000 | 0.690 |
| 6        | 0.646 | 0.043 | 0.000 | 0.690 |
| 7        | 0.646 | 0.043 | 0.000 | 0.690 |
| 8        | 0.646 | 0.043 | 0.000 | 0.690 |
| 9        | 0.646 | 0.043 | 0.000 | 0.690 |
| 10       | 0.646 | 0.043 | 0.000 | 0.690 |
| 11       | 0.646 | 0.043 | 0.000 | 0.690 |
| 12       | 0.646 | 0.043 | 0.000 | 0.690 |
| 13       | 0.646 | 0.043 | 0.000 | 0.689 |
| 14       | 0.646 | 0.043 | 0.000 | 0.689 |
| 15       | 0.648 | 0.045 | 0.000 | 0.693 |
| 16       | 0.646 | 0.043 | 0.000 | 0.689 |
| 17       | 0.646 | 0.043 | 0.000 | 0.689 |
| 18       | 0.646 | 0.043 | 0.000 | 0.689 |
| 19       | 0.646 | 0.043 | 0.000 | 0.689 |
| 20       | 0.646 | 0.043 | 0.000 | 0.689 |

|    |       |       |       |       |
|----|-------|-------|-------|-------|
| 21 | 0.646 | 0.043 | 0.000 | 0.689 |
| 22 | 0.646 | 0.044 | 0.000 | 0.690 |
| 23 | 0.541 | 0.015 | 0.000 | 0.557 |
| 24 | 0.541 | 0.015 | 0.000 | 0.556 |
| 25 | 0.870 | 1.763 | 0.000 | 2.633 |
| 26 | 0.867 | 1.785 | 0.000 | 2.653 |
| 27 | 0.867 | 1.786 | 0.000 | 2.653 |
| 28 | 0.870 | 1.762 | 0.000 | 2.632 |
| 29 | 0.865 | 1.783 | 0.000 | 2.648 |
| 30 | 0.870 | 1.763 | 0.000 | 2.633 |
| 31 | 0.867 | 1.786 | 0.000 | 2.653 |
| 32 | 0.867 | 1.786 | 0.000 | 2.653 |
| 33 | 0.870 | 1.762 | 0.000 | 2.632 |
| 34 | 0.865 | 1.783 | 0.000 | 2.648 |
| 35 | 0.870 | 1.763 | 0.000 | 2.633 |
| 36 | 0.868 | 1.787 | 0.000 | 2.654 |
| 37 | 0.867 | 1.786 | 0.000 | 2.653 |
| 38 | 0.870 | 1.763 | 0.000 | 2.633 |
| 39 | 0.865 | 1.784 | 0.000 | 2.649 |
| 40 | 0.870 | 1.763 | 0.000 | 2.633 |
| 41 | 0.868 | 1.787 | 0.000 | 2.655 |
| 42 | 0.867 | 1.786 | 0.000 | 2.653 |

|    |       |       |       |       |
|----|-------|-------|-------|-------|
| 43 | 0.871 | 1.764 | 0.000 | 2.634 |
| 44 | 0.865 | 1.783 | 0.000 | 2.648 |
| 45 | 0.870 | 1.763 | 0.000 | 2.633 |
| 46 | 0.867 | 1.786 | 0.000 | 2.653 |
| 47 | 0.867 | 1.786 | 0.000 | 2.653 |
| 48 | 0.871 | 1.763 | 0.000 | 2.634 |
| 49 | 0.865 | 1.783 | 0.000 | 2.648 |
| 50 | 0.870 | 1.763 | 0.000 | 2.633 |
| 51 | 0.867 | 1.786 | 0.000 | 2.653 |
| 52 | 0.867 | 1.786 | 0.000 | 2.653 |
| 53 | 0.870 | 1.762 | 0.000 | 2.632 |
| 54 | 0.865 | 1.784 | 0.000 | 2.648 |
| 55 | 0.865 | 1.784 | 0.000 | 2.649 |
| 56 | 0.865 | 1.786 | 0.000 | 2.651 |
| 57 | 0.866 | 1.787 | 0.000 | 2.653 |
| 58 | 0.866 | 1.790 | 0.000 | 2.656 |
| 59 | 0.865 | 1.786 | 0.000 | 2.651 |
| 60 | 0.866 | 1.786 | 0.000 | 2.651 |
| 61 | 0.866 | 1.788 | 0.000 | 2.654 |
| 62 | 0.867 | 1.791 | 0.000 | 2.658 |
| 63 | 0.865 | 1.784 | 0.000 | 2.649 |
| 64 | 0.865 | 1.786 | 0.000 | 2.651 |

|    |       |       |       |       |
|----|-------|-------|-------|-------|
| 65 | 0.866 | 1.787 | 0.000 | 2.652 |
| 66 | 0.865 | 1.788 | 0.000 | 2.653 |
| 67 | 0.865 | 1.786 | 0.000 | 2.651 |
| 68 | 0.866 | 1.785 | 0.000 | 2.651 |
| 69 | 0.865 | 1.787 | 0.000 | 2.652 |
| 70 | 0.866 | 1.787 | 0.000 | 2.653 |
| 71 | 0.865 | 1.784 | 0.000 | 2.649 |
| 72 | 0.865 | 1.786 | 0.000 | 2.651 |
| 73 | 0.866 | 1.786 | 0.000 | 2.652 |
| 74 | 0.864 | 1.785 | 0.000 | 2.649 |
| 75 | 0.865 | 1.786 | 0.000 | 2.651 |
| 76 | 0.866 | 1.786 | 0.000 | 2.651 |
| 77 | 0.865 | 1.786 | 0.000 | 2.651 |
| 78 | 0.865 | 1.784 | 0.000 | 2.649 |
| 79 | 0.865 | 1.784 | 0.000 | 2.649 |
| 80 | 0.865 | 1.786 | 0.000 | 2.651 |
| 81 | 0.865 | 1.785 | 0.000 | 2.650 |
| 82 | 0.863 | 1.782 | 0.000 | 2.645 |
| 83 | 0.865 | 1.786 | 0.000 | 2.651 |
| 84 | 0.866 | 1.786 | 0.000 | 2.651 |
| 85 | 0.865 | 1.784 | 0.000 | 2.648 |
| 86 | 0.862 | 1.774 | 0.000 | 2.636 |

|     |       |       |       |       |
|-----|-------|-------|-------|-------|
| 87  | 0.865 | 1.784 | 0.000 | 2.649 |
| 88  | 0.865 | 1.787 | 0.000 | 2.652 |
| 89  | 0.865 | 1.785 | 0.000 | 2.650 |
| 90  | 0.865 | 1.788 | 0.000 | 2.653 |
| 91  | 0.865 | 1.786 | 0.000 | 2.651 |
| 92  | 0.866 | 1.786 | 0.000 | 2.651 |
| 93  | 0.864 | 1.783 | 0.000 | 2.647 |
| 94  | 0.866 | 1.785 | 0.000 | 2.651 |
| 95  | 0.865 | 1.784 | 0.000 | 2.649 |
| 96  | 0.865 | 1.786 | 0.000 | 2.651 |
| 97  | 0.866 | 1.787 | 0.000 | 2.653 |
| 98  | 0.866 | 1.789 | 0.000 | 2.655 |
| 99  | 0.865 | 1.786 | 0.000 | 2.651 |
| 100 | 0.866 | 1.786 | 0.000 | 2.651 |
| 101 | 0.865 | 1.787 | 0.000 | 2.652 |
| 102 | 0.867 | 1.790 | 0.000 | 2.657 |
| 103 | 0.865 | 1.786 | 0.000 | 2.651 |
| 104 | 0.867 | 1.785 | 0.000 | 2.653 |
| 105 | 0.866 | 1.786 | 0.000 | 2.652 |
| 106 | 0.870 | 1.778 | 0.000 | 2.648 |
| 107 | 0.869 | 1.765 | 0.000 | 2.635 |
| 108 | 0.865 | 1.783 | 0.000 | 2.648 |

|     |       |       |       |       |
|-----|-------|-------|-------|-------|
| 109 | 0.869 | 1.789 | 0.000 | 2.658 |
| 110 | 0.865 | 1.786 | 0.000 | 2.651 |
| 111 | 0.867 | 1.785 | 0.000 | 2.653 |
| 112 | 0.867 | 1.789 | 0.000 | 2.655 |
| 113 | 0.871 | 1.782 | 0.000 | 2.653 |
| 114 | 0.869 | 1.765 | 0.000 | 2.634 |
| 115 | 0.865 | 1.783 | 0.000 | 2.648 |
| 116 | 0.870 | 1.791 | 0.000 | 2.661 |
| 117 | 0.865 | 1.786 | 0.000 | 2.651 |
| 118 | 0.867 | 1.786 | 0.000 | 2.653 |
| 119 | 0.865 | 1.782 | 0.000 | 2.647 |
| 120 | 0.857 | 1.707 | 0.000 | 2.564 |
| 121 | 0.869 | 1.765 | 0.000 | 2.634 |
| 122 | 0.865 | 1.783 | 0.000 | 2.648 |
| 123 | 0.866 | 1.778 | 0.000 | 2.644 |
| 124 | 0.866 | 1.786 | 0.000 | 2.652 |
| 125 | 0.867 | 1.785 | 0.000 | 2.653 |
| 126 | 0.862 | 1.776 | 0.000 | 2.638 |
| 127 | 0.849 | 1.831 | 0.000 | 2.680 |
| 128 | 0.870 | 1.767 | 0.000 | 2.637 |
| 129 | 0.865 | 1.783 | 0.000 | 2.648 |
| 130 | 0.860 | 1.757 | 0.000 | 2.617 |

|     |       |       |       |       |
|-----|-------|-------|-------|-------|
| 131 | 0.866 | 1.786 | 0.000 | 2.652 |
| 132 | 0.867 | 1.784 | 0.000 | 2.652 |
| 133 | 0.864 | 1.787 | 0.000 | 2.651 |
| 134 | 0.869 | 1.790 | 0.000 | 2.659 |
| 135 | 0.869 | 1.767 | 0.000 | 2.636 |
| 136 | 0.865 | 1.783 | 0.000 | 2.648 |
| 137 | 0.866 | 1.772 | 0.000 | 2.638 |
| 138 | 0.866 | 1.786 | 0.000 | 2.652 |
| 139 | 0.867 | 1.785 | 0.000 | 2.652 |
| 140 | 0.866 | 1.788 | 0.000 | 2.654 |
| 141 | 0.870 | 1.779 | 0.000 | 2.649 |
| 142 | 0.869 | 1.766 | 0.000 | 2.635 |
| 143 | 0.865 | 1.783 | 0.000 | 2.648 |
| 144 | 0.869 | 1.790 | 0.000 | 2.659 |
| 145 | 0.946 | 1.730 | 0.000 | 2.676 |
| 146 | 1.240 | 1.546 | 0.074 | 2.860 |
| 147 | 1.635 | 3.538 | 0.000 | 5.173 |

-----

tot            123.067 221.574    0.074 344.715

magnetization (x)

| # of ion | s      | p      | d     | tot    |
|----------|--------|--------|-------|--------|
| 1        | 0.000  | -0.000 | 0.000 | 0.000  |
| 2        | -0.000 | 0.000  | 0.000 | -0.000 |
| 3        | 0.000  | -0.000 | 0.000 | 0.000  |
| 4        | -0.000 | 0.000  | 0.000 | -0.000 |
| 5        | 0.000  | -0.000 | 0.000 | 0.000  |
| 6        | -0.000 | 0.000  | 0.000 | -0.000 |
| 7        | 0.000  | -0.000 | 0.000 | 0.000  |
| 8        | -0.000 | 0.000  | 0.000 | -0.000 |
| 9        | 0.000  | -0.000 | 0.000 | 0.000  |
| 10       | -0.000 | 0.000  | 0.000 | -0.000 |
| 11       | 0.000  | -0.000 | 0.000 | 0.000  |
| 12       | -0.000 | 0.000  | 0.000 | -0.000 |
| 13       | 0.000  | -0.000 | 0.000 | 0.000  |
| 14       | -0.004 | 0.002  | 0.000 | -0.002 |
| 15       | 0.000  | -0.000 | 0.000 | 0.000  |
| 16       | -0.004 | 0.002  | 0.000 | -0.002 |
| 17       | -0.004 | 0.002  | 0.000 | -0.002 |
| 18       | 0.000  | -0.000 | 0.000 | 0.000  |

|    |        |        |       |        |
|----|--------|--------|-------|--------|
| 19 | -0.003 | 0.001  | 0.000 | -0.002 |
| 20 | 0.000  | -0.000 | 0.000 | 0.000  |
| 21 | -0.003 | 0.002  | 0.000 | -0.002 |
| 22 | -0.003 | 0.002  | 0.000 | -0.002 |
| 23 | -0.000 | 0.000  | 0.000 | -0.000 |
| 24 | -0.000 | 0.000  | 0.000 | -0.000 |
| 25 | -0.000 | -0.007 | 0.000 | -0.008 |
| 26 | -0.000 | -0.002 | 0.000 | -0.002 |
| 27 | 0.000  | 0.003  | 0.000 | 0.003  |
| 28 | 0.000  | 0.005  | 0.000 | 0.005  |
| 29 | 0.000  | 0.003  | 0.000 | 0.003  |
| 30 | -0.000 | -0.007 | 0.000 | -0.008 |
| 31 | -0.000 | -0.002 | 0.000 | -0.002 |
| 32 | 0.000  | 0.003  | 0.000 | 0.003  |
| 33 | 0.000  | 0.005  | 0.000 | 0.005  |
| 34 | 0.000  | 0.002  | 0.000 | 0.002  |
| 35 | -0.000 | -0.007 | 0.000 | -0.008 |
| 36 | -0.000 | -0.002 | 0.000 | -0.002 |
| 37 | 0.000  | 0.003  | 0.000 | 0.003  |
| 38 | 0.000  | 0.006  | 0.000 | 0.007  |
| 39 | 0.000  | 0.002  | 0.000 | 0.002  |
| 40 | -0.000 | -0.007 | 0.000 | -0.008 |

|    |        |        |       |        |
|----|--------|--------|-------|--------|
| 41 | -0.000 | -0.002 | 0.000 | -0.002 |
| 42 | 0.000  | 0.002  | 0.000 | 0.003  |
| 43 | 0.000  | 0.005  | 0.000 | 0.005  |
| 44 | 0.000  | 0.004  | 0.000 | 0.004  |
| 45 | -0.000 | -0.007 | 0.000 | -0.008 |
| 46 | -0.000 | -0.002 | 0.000 | -0.002 |
| 47 | 0.000  | 0.002  | 0.000 | 0.003  |
| 48 | 0.000  | 0.005  | 0.000 | 0.006  |
| 49 | 0.000  | 0.001  | 0.000 | 0.001  |
| 50 | -0.000 | -0.007 | 0.000 | -0.008 |
| 51 | -0.000 | -0.002 | 0.000 | -0.002 |
| 52 | 0.000  | 0.002  | 0.000 | 0.003  |
| 53 | 0.000  | 0.006  | 0.000 | 0.007  |
| 54 | 0.000  | 0.002  | 0.000 | 0.002  |
| 55 | -0.000 | -0.005 | 0.000 | -0.006 |
| 56 | -0.000 | -0.007 | 0.000 | -0.007 |
| 57 | -0.000 | -0.001 | 0.000 | -0.001 |
| 58 | -0.000 | -0.001 | 0.000 | -0.001 |
| 59 | 0.000  | 0.006  | 0.000 | 0.007  |
| 60 | 0.000  | 0.003  | 0.000 | 0.003  |
| 61 | 0.000  | 0.001  | 0.000 | 0.001  |
| 62 | 0.000  | 0.003  | 0.000 | 0.003  |

|    |        |        |       |        |
|----|--------|--------|-------|--------|
| 63 | -0.000 | -0.005 | 0.000 | -0.006 |
| 64 | -0.000 | -0.007 | 0.000 | -0.007 |
| 65 | -0.000 | -0.001 | 0.000 | -0.001 |
| 66 | -0.000 | -0.001 | 0.000 | -0.001 |
| 67 | 0.000  | 0.006  | 0.000 | 0.006  |
| 68 | 0.000  | 0.003  | 0.000 | 0.003  |
| 69 | 0.000  | 0.001  | 0.000 | 0.001  |
| 70 | 0.000  | 0.002  | 0.000 | 0.002  |
| 71 | -0.000 | -0.005 | 0.000 | -0.006 |
| 72 | -0.000 | -0.007 | 0.000 | -0.007 |
| 73 | -0.000 | -0.001 | 0.000 | -0.001 |
| 74 | -0.000 | -0.002 | 0.000 | -0.002 |
| 75 | 0.000  | 0.006  | 0.000 | 0.007  |
| 76 | 0.000  | 0.003  | 0.000 | 0.004  |
| 77 | 0.000  | 0.003  | 0.000 | 0.003  |
| 78 | 0.000  | 0.001  | 0.000 | 0.001  |
| 79 | -0.000 | -0.005 | 0.000 | -0.006 |
| 80 | -0.000 | -0.007 | 0.000 | -0.007 |
| 81 | -0.000 | -0.001 | 0.000 | -0.002 |
| 82 | -0.000 | -0.002 | 0.000 | -0.002 |
| 83 | 0.001  | 0.007  | 0.000 | 0.008  |
| 84 | 0.000  | 0.003  | 0.000 | 0.003  |

|     |        |        |       |        |
|-----|--------|--------|-------|--------|
| 85  | 0.000  | 0.002  | 0.000 | 0.002  |
| 86  | 0.000  | 0.005  | 0.000 | 0.006  |
| 87  | -0.000 | -0.005 | 0.000 | -0.005 |
| 88  | -0.000 | -0.007 | 0.000 | -0.007 |
| 89  | -0.000 | -0.001 | 0.000 | -0.002 |
| 90  | -0.000 | -0.002 | 0.000 | -0.002 |
| 91  | 0.001  | 0.008  | 0.000 | 0.008  |
| 92  | 0.000  | 0.003  | 0.000 | 0.003  |
| 93  | 0.000  | 0.002  | 0.000 | 0.003  |
| 94  | 0.000  | 0.001  | 0.000 | 0.001  |
| 95  | -0.000 | -0.005 | 0.000 | -0.006 |
| 96  | -0.000 | -0.007 | 0.000 | -0.007 |
| 97  | -0.000 | -0.001 | 0.000 | -0.001 |
| 98  | -0.000 | -0.001 | 0.000 | -0.001 |
| 99  | 0.001  | 0.007  | 0.000 | 0.007  |
| 100 | 0.000  | 0.003  | 0.000 | 0.004  |
| 101 | 0.000  | 0.003  | 0.000 | 0.003  |
| 102 | 0.000  | 0.002  | 0.000 | 0.002  |
| 103 | -0.001 | -0.010 | 0.000 | -0.011 |
| 104 | -0.003 | -0.028 | 0.000 | -0.031 |
| 105 | -0.000 | -0.001 | 0.000 | -0.002 |
| 106 | -0.000 | -0.004 | 0.000 | -0.005 |

|     |        |        |       |        |
|-----|--------|--------|-------|--------|
| 107 | 0.007  | 0.116  | 0.000 | 0.122  |
| 108 | 0.001  | 0.010  | 0.000 | 0.011  |
| 109 | 0.000  | 0.001  | 0.000 | 0.001  |
| 110 | -0.001 | -0.010 | 0.000 | -0.011 |
| 111 | -0.003 | -0.028 | 0.000 | -0.031 |
| 112 | -0.000 | -0.001 | 0.000 | -0.002 |
| 113 | -0.000 | -0.003 | 0.000 | -0.004 |
| 114 | 0.007  | 0.120  | 0.000 | 0.127  |
| 115 | 0.001  | 0.010  | 0.000 | 0.011  |
| 116 | 0.000  | 0.001  | 0.000 | 0.002  |
| 117 | -0.001 | -0.010 | 0.000 | -0.011 |
| 118 | -0.003 | -0.026 | 0.000 | -0.029 |
| 119 | -0.000 | -0.002 | 0.000 | -0.002 |
| 120 | -0.000 | -0.002 | 0.000 | -0.002 |
| 121 | 0.007  | 0.115  | 0.000 | 0.122  |
| 122 | 0.001  | 0.010  | 0.000 | 0.010  |
| 123 | 0.000  | 0.003  | 0.000 | 0.003  |
| 124 | -0.001 | -0.010 | 0.000 | -0.011 |
| 125 | -0.003 | -0.024 | 0.000 | -0.027 |
| 126 | -0.000 | -0.002 | 0.000 | -0.002 |
| 127 | -0.000 | 0.001  | 0.000 | 0.001  |
| 128 | 0.006  | 0.105  | 0.000 | 0.111  |

|       |        |        |        |        |
|-------|--------|--------|--------|--------|
| 129   | 0.001  | 0.009  | 0.000  | 0.010  |
| 130   | 0.000  | 0.004  | 0.000  | 0.004  |
| 131   | -0.001 | -0.009 | 0.000  | -0.010 |
| 132   | -0.003 | -0.024 | 0.000  | -0.027 |
| 133   | -0.000 | -0.002 | 0.000  | -0.002 |
| 134   | -0.000 | -0.002 | 0.000  | -0.002 |
| 135   | 0.006  | 0.097  | 0.000  | 0.102  |
| 136   | 0.001  | 0.009  | 0.000  | 0.010  |
| 137   | 0.000  | 0.004  | 0.000  | 0.005  |
| 138   | -0.001 | -0.010 | 0.000  | -0.011 |
| 139   | -0.003 | -0.026 | 0.000  | -0.029 |
| 140   | -0.000 | -0.002 | 0.000  | -0.002 |
| 141   | -0.000 | -0.003 | 0.000  | -0.004 |
| 142   | 0.006  | 0.105  | 0.000  | 0.111  |
| 143   | 0.001  | 0.010  | 0.000  | 0.010  |
| 144   | 0.000  | 0.002  | 0.000  | 0.003  |
| 145   | 0.000  | 0.005  | 0.000  | 0.006  |
| 146   | -0.000 | 0.000  | -0.000 | 0.000  |
| 147   | 0.000  | 0.004  | 0.000  | 0.004  |
| ----- |        |        |        |        |
| tot   | 0.001  | 0.513  | -0.000 | 0.514  |

CHARGE:  cpu time    0.5207: real time    0.5225  
FORLOC:  cpu time    0.0200: real time    0.0200  
FORNL :  cpu time    2.0395: real time    2.0467  
STRESS:  cpu time    6.0482: real time    6.1297  
FORCOR:  cpu time    0.1385: real time    0.1394  
FORHAR:  cpu time    0.0331: real time    0.0332  
MIXING:  cpu time    0.0108: real time    0.0108  
OFIELD:  cpu time    0.0001: real time    0.0001

-----

DFTD3 V3.0 Rev 1

Edisp (eV)   -6.61796

E6   (eV):   -3.9313

E8   (eV):   -2.6867

% E8        : 40.60

FORVDW:  cpu time    1.7843: real time    1.8311

FORCE on cell =-STRESS in cart. coord.   units (eV):

Direction   XX            YY            ZZ            XY            YZ            ZX

-----

|         |              |              |              |          |             |            |
|---------|--------------|--------------|--------------|----------|-------------|------------|
| Alpha Z | 233.50077    | 233.50077    | 233.50077    |          |             |            |
| Ewald   | 107585.33206 | 23489.11467  | -39738.14176 | 10.22187 | 3453.74406  | 128.63845  |
| Hartree | 106105.06727 | 25041.40737  | -23802.80868 | -6.67003 | 2945.37234  | 93.20003   |
| E(xc)   | -1914.30055  | -1916.63916  | -1979.96915  | 0.13357  | 1.81986     | 0.12973    |
| Local   | *****        | -53978.07964 | 57034.52900  | -0.05361 | -6356.87834 | -218.39297 |
| n-local | -472.72733   | -482.63651   | -439.61069   | -0.69503 | -0.75894    | -0.32313   |
| augment | -38.27302    | -38.61717    | -34.28739    | 0.00537  | -0.98261    | 0.00032    |
| Kinetic | 7635.49820   | 7638.82569   | 8714.61503   | -3.11030 | -41.35382   | -3.15643   |
| Fock    | 0.00000      | 0.00000      | 0.00000      | 0.00000  | 0.00000     | 0.00000    |
| vdW     | -2.64123     | -1.49237     | -6.59252     | 0.00142  | -0.07447    | 0.01226    |

-----

|                     |           |           |                 |          |         |         |
|---------------------|-----------|-----------|-----------------|----------|---------|---------|
| Total               | -17.71170 | -14.61635 | -18.76538       | -0.16675 | 0.88807 | 0.10826 |
| in kB               | -4.88410  | -4.03054  | -5.17466        | -0.04598 | 0.24489 | 0.02985 |
| external pressure = |           | -4.70 kB  | Pullay stress = |          | 0.00 kB |         |

VOLUME and BASIS-vectors are now :

-----

energy-cutoff : 400.00

volume of cell : 5810.14

|                                      |                                     |
|--------------------------------------|-------------------------------------|
| direct lattice vectors               | reciprocal lattice vectors          |
| 14.780600000 0.000000000 0.000000000 | 0.067656252 0.000000000 0.000000000 |

|             |              |              |             |             |             |
|-------------|--------------|--------------|-------------|-------------|-------------|
| 0.000000000 | 21.333900000 | 0.000000000  | 0.000000000 | 0.046873755 | 0.000000000 |
| 0.000000000 | 0.000000000  | 18.425700000 | 0.000000000 | 0.000000000 | 0.054272022 |

length of vectors

|              |              |              |             |             |             |
|--------------|--------------|--------------|-------------|-------------|-------------|
| 14.780600000 | 21.333900000 | 18.425700000 | 0.067656252 | 0.046873755 | 0.054272022 |
|--------------|--------------|--------------|-------------|-------------|-------------|

FORCES acting on ions

|                       |             |                 |
|-----------------------|-------------|-----------------|
| electron-ion (+dipol) | ewald-force | non-local-force |
|-----------------------|-------------|-----------------|

convergence-correction

-----

|           |           |           |           |           |           |           |           |   |
|-----------|-----------|-----------|-----------|-----------|-----------|-----------|-----------|---|
| 0.447E-02 | 0.154E+03 | 0.361E+02 | -.296E-02 | -.160E+03 | -.357E+02 | -.180E-02 | 0.566E+01 | - |
| .438E+00  | 0.882E-07 | 0.729E-06 | 0.476E-06 |           |           |           |           |   |
| -.187E-01 | 0.155E+03 | -.340E+02 | 0.163E-01 | -.160E+03 | 0.335E+02 | 0.115E-02 | 0.565E+01 |   |
| 0.541E+00 | -.671E-06 | 0.254E-06 | -.265E-06 |           |           |           |           |   |
| 0.184E+00 | 0.154E+03 | 0.360E+02 | -.184E+00 | -.160E+03 | -.356E+02 | 0.961E-05 | 0.565E+01 | - |
| .443E+00  | -.177E-06 | 0.844E-06 | 0.246E-06 |           |           |           |           |   |
| 0.112E+00 | 0.155E+03 | -.341E+02 | -.989E-01 | -.160E+03 | 0.336E+02 | -.175E-01 | 0.565E+01 |   |
| 0.535E+00 | 0.856E-07 | 0.558E-06 | -.504E-06 |           |           |           |           |   |
| 0.172E+00 | 0.154E+03 | 0.362E+02 | -.173E+00 | -.160E+03 | -.357E+02 | 0.117E-02 | 0.566E+01 | - |
| .440E+00  | -.310E-06 | 0.844E-06 | 0.705E-06 |           |           |           |           |   |
| 0.126E+00 | 0.154E+03 | -.340E+02 | -.108E+00 | -.160E+03 | 0.334E+02 | -.211E-01 | 0.565E+01 |   |

0.541E+00 0.711E-06 0.266E-06 0.254E-06  
-.191E-01 0.154E+03 0.363E+02 0.179E-01 -.160E+03 -.359E+02 0.159E-02 0.566E+01 -  
.431E+00 -.159E-06 0.671E-06 0.139E-05  
-.127E-01 0.154E+03 -.338E+02 0.196E-01 -.160E+03 0.332E+02 -.720E-02 0.565E+01  
0.555E+00 0.557E-06 -.154E-06 0.119E-05  
-.182E+00 0.154E+03 0.363E+02 0.182E+00 -.160E+03 -.359E+02 0.254E-03 0.566E+01 -  
.429E+00 0.230E-06 0.644E-06 0.158E-05  
-.128E+00 0.155E+03 -.337E+02 0.115E+00 -.160E+03 0.331E+02 0.109E-01 0.565E+01  
0.561E+00 -.498E-07 -.476E-06 0.140E-05  
-.174E+00 0.154E+03 0.362E+02 0.176E+00 -.160E+03 -.358E+02 -.177E-02 0.566E+01 -  
.432E+00 0.329E-06 0.655E-06 0.115E-05  
-.115E+00 0.155E+03 -.338E+02 0.961E-01 -.160E+03 0.332E+02 0.192E-01 0.565E+01  
0.555E+00 -.630E-06 -.290E-06 0.689E-06  
0.228E+01 -.150E+03 -.387E+02 -.227E+01 0.156E+03 0.386E+02 -.103E-01 -.566E+01  
0.767E-01 0.522E-06 -.133E-07 0.192E-06  
-.420E+00 -.151E+03 0.388E+02 0.421E+00 0.157E+03 -.386E+02 -.130E-02 -.567E+01 -  
.269E+00 -.307E-06 -.196E-06 -.254E-06  
0.136E+02 -.146E+03 -.413E+02 -.138E+02 0.151E+03 0.413E+02 0.257E+00 -.567E+01 -  
.348E-01 0.116E-07 -.750E-07 -.880E-07  
0.162E+01 -.151E+03 0.402E+02 -.162E+01 0.156E+03 -.400E+02 -.998E-03 -.567E+01 -  
.229E+00 0.253E-06 0.673E-07 0.570E-06  
0.353E+01 -.149E+03 0.443E+02 -.353E+01 0.155E+03 -.441E+02 -.195E-02 -.567E+01 -

.180E+00 0.658E-06 0.425E-07 0.277E-06  
-.149E+02 -.146E+03 -.330E+02 0.150E+02 0.151E+03 0.329E+02 -.966E-01 -.566E+01  
0.498E-01 -.108E-05 0.588E-06 0.117E-05  
-.297E+01 -.149E+03 0.432E+02 0.296E+01 0.155E+03 -.430E+02 0.115E-01 -.567E+01 -  
.241E+00 -.294E-06 -.334E-06 -.124E-05  
-.380E+01 -.150E+03 -.385E+02 0.380E+01 0.156E+03 0.385E+02 -.631E-02 -.566E+01  
0.241E-01 0.393E-07 -.162E-06 0.291E-06  
-.208E+01 -.151E+03 0.395E+02 0.208E+01 0.156E+03 -.392E+02 0.149E-02 -.566E+01 -  
.282E+00 -.656E-06 -.385E-06 -.113E-05  
0.775E-02 -.148E+03 0.486E+02 -.688E-04 0.154E+03 -.484E+02 -.556E-02 -.569E+01 -  
.158E+00 0.391E-06 -.823E-07 -.740E-06  
0.196E+02 -.103E+03 0.222E+02 -.212E+02 0.103E+03 -.246E+02 0.154E+01 0.139E+00  
0.238E+01 0.104E-06 -.553E-06 0.449E-06  
-.191E+02 -.103E+03 0.154E+02 0.215E+02 0.103E+03 -.169E+02 -.241E+01 -.119E+00  
0.152E+01 0.110E-06 -.960E-06 0.121E-05  
0.709E-01 0.461E+03 0.202E+03 -.741E-01 -.462E+03 -.201E+03 0.382E-02 0.102E+01 -  
.219E+00 0.651E-06 0.190E-06 0.125E-05  
0.212E+00 0.353E+03 -.234E+03 -.212E+00 -.353E+03 0.234E+03 0.260E-02 0.442E+00 -  
.370E-01 -.678E-06 0.214E-05 -.247E-05  
-.255E-01 0.351E+03 0.240E+03 0.241E-01 -.351E+03 -.241E+03 0.313E-02 0.408E+00  
0.563E-01 0.119E-05 -.151E-05 0.201E-05  
-.173E+00 0.462E+03 -.195E+03 0.180E+00 -.463E+03 0.195E+03 -.666E-02 0.105E+01

0.233E+00 -.181E-05 0.124E-05 -.170E-05  
-.623E-01 0.210E+03 -.272E+03 0.664E-01 -.210E+03 0.272E+03 -.449E-02 0.931E-01  
0.560E-01 -.226E-06 0.102E-05 -.157E-05  
0.562E+00 0.461E+03 0.202E+03 -.565E+00 -.462E+03 -.201E+03 0.202E-02 0.102E+01 -  
.214E+00 -.626E-06 0.366E-06 0.534E-06  
0.106E+01 0.352E+03 -.234E+03 -.107E+01 -.353E+03 0.234E+03 0.160E-01 0.448E+00 -  
.424E-01 0.721E-06 0.181E-05 -.128E-05  
0.413E+00 0.351E+03 0.240E+03 -.415E+00 -.351E+03 -.240E+03 0.302E-02 0.408E+00  
0.490E-01 0.539E-08 -.137E-05 0.430E-06  
0.579E+00 0.462E+03 -.195E+03 -.584E+00 -.463E+03 0.195E+03 0.481E-02 0.105E+01  
0.235E+00 0.304E-06 0.222E-05 -.238E-05  
0.690E+00 0.210E+03 -.272E+03 -.696E+00 -.210E+03 0.272E+03 0.602E-02 0.907E-01  
0.615E-01 0.824E-07 0.397E-06 -.657E-06  
0.426E+00 0.461E+03 0.202E+03 -.429E+00 -.462E+03 -.202E+03 0.387E-02 0.102E+01 -  
.214E+00 -.146E-05 0.566E-06 0.227E-05  
0.939E+00 0.352E+03 -.233E+03 -.956E+00 -.352E+03 0.233E+03 0.151E-01 0.440E+00 -  
.377E-01 0.152E-05 -.446E-06 0.148E-05  
0.479E+00 0.351E+03 0.241E+03 -.481E+00 -.351E+03 -.241E+03 0.251E-02 0.406E+00  
0.511E-01 -.102E-05 -.122E-05 0.100E-05  
0.705E+00 0.462E+03 -.194E+03 -.716E+00 -.463E+03 0.194E+03 0.789E-02 0.106E+01  
0.242E+00 0.193E-05 0.374E-06 0.329E-06  
0.725E+00 0.210E+03 -.271E+03 -.734E+00 -.210E+03 0.271E+03 0.661E-02 0.905E-01

0.593E-01 0.209E-06 -.121E-05 0.943E-06  
-.181E+00 0.461E+03 0.202E+03 0.177E+00 -.462E+03 -.202E+03 0.450E-02 0.102E+01 -  
.218E+00 -.841E-06 0.530E-06 0.469E-05  
-.294E+00 0.352E+03 -.233E+03 0.298E+00 -.352E+03 0.233E+03 -.205E-02 0.440E+00 -  
.299E-01 0.241E-06 -.283E-05 0.329E-05  
0.410E-01 0.351E+03 0.241E+03 -.400E-01 -.351E+03 -.241E+03 0.225E-02 0.409E+00  
0.556E-01 -.149E-05 -.783E-06 0.311E-05  
0.505E-01 0.462E+03 -.194E+03 -.567E-01 -.463E+03 0.194E+03 0.400E-02 0.106E+01  
0.232E+00 0.137E-05 -.223E-05 0.340E-05  
-.477E-01 0.210E+03 -.271E+03 0.457E-01 -.210E+03 0.271E+03 -.249E-03 0.928E-01  
0.325E-01 0.607E-07 -.260E-05 0.192E-05  
-.552E+00 0.461E+03 0.202E+03 0.550E+00 -.462E+03 -.202E+03 0.759E-03 0.102E+01 -  
.220E+00 0.886E-06 0.306E-06 0.526E-05  
-.119E+01 0.352E+03 -.233E+03 0.120E+01 -.353E+03 0.233E+03 -.162E-01 0.447E+00 -  
.330E-01 -.661E-06 -.202E-05 0.230E-05  
-.352E+00 0.351E+03 0.241E+03 0.349E+00 -.351E+03 -.241E+03 0.206E-02 0.413E+00  
0.622E-01 0.219E-07 -.658E-06 0.458E-05  
-.412E+00 0.462E+03 -.194E+03 0.426E+00 -.463E+03 0.194E+03 -.115E-01 0.106E+01  
0.230E+00 -.223E-06 -.337E-05 0.400E-05  
-.561E+00 0.210E+03 -.271E+03 0.566E+00 -.210E+03 0.271E+03 -.949E-02 0.909E-01  
0.525E-01 -.122E-06 -.234E-05 0.122E-05  
-.476E+00 0.461E+03 0.202E+03 0.475E+00 -.462E+03 -.202E+03 0.305E-02 0.102E+01 -

.221E+00 0.142E-05 -.226E-07 0.362E-05  
-.806E+00 0.353E+03 -.234E+03 0.820E+00 -.353E+03 0.234E+03 -.150E-01 0.447E+00 -  
.393E-01 -.105E-05 0.283E-06 -.568E-06  
-.374E+00 0.351E+03 0.241E+03 0.369E+00 -.351E+03 -.241E+03 0.941E-03 0.411E+00  
0.625E-01 0.126E-05 -.124E-05 0.403E-05  
-.595E+00 0.462E+03 -.194E+03 0.608E+00 -.463E+03 0.194E+03 -.170E-01 0.105E+01  
0.234E+00 -.166E-05 -.175E-05 0.158E-05  
-.588E+00 0.210E+03 -.272E+03 0.599E+00 -.210E+03 0.272E+03 -.102E-01 0.986E-01  
0.566E-01 0.145E-06 -.652E-06 -.553E-06  
-.957E-02 0.206E+03 0.279E+03 0.129E-01 -.206E+03 -.279E+03 -.361E-02 0.685E-01 -  
.413E-01 0.102E-05 -.178E-05 0.141E-05  
0.667E+00 0.303E+02 0.296E+03 -.662E+00 -.302E+02 -.296E+03 -.468E-02 -.411E-01  
0.736E-02 0.722E-07 -.232E-05 0.145E-05  
-.846E+00 0.144E+03 -.282E+03 0.848E+00 -.144E+03 0.282E+03 -.316E-02 0.136E+00  
0.286E-01 0.151E-06 -.239E-06 -.709E-06  
0.534E+00 -.215E+02 -.285E+03 -.534E+00 0.214E+02 0.285E+03 -.781E-03 0.383E-01  
0.186E-01 0.371E-06 -.206E-05 0.144E-05  
0.497E+00 -.294E+02 0.293E+03 -.494E+00 0.294E+02 -.293E+03 -.553E-02 0.253E-01 -  
.305E-01 -.395E-06 -.160E-05 0.878E-06  
0.524E+00 0.139E+03 0.289E+03 -.524E+00 -.139E+03 -.289E+03 0.178E-02 0.103E+00 -  
.249E-01 0.555E-06 -.233E-05 0.947E-06  
-.127E+01 0.364E+02 -.287E+03 0.127E+01 -.364E+02 0.287E+03 -.115E-03 -.806E-02

0.138E-01 0.984E-06 -.139E-05 0.773E-06  
0.167E+01 -.130E+03 -.271E+03 -.169E+01 0.130E+03 0.271E+03 0.106E-01 -.882E-01  
0.373E-01 0.489E-06 -.254E-05 0.228E-05  
0.397E+00 0.207E+03 0.280E+03 -.395E+00 -.207E+03 -.280E+03 0.713E-03 0.694E-01 -  
.372E-01 0.471E-07 -.231E-05 0.483E-06  
0.920E+00 0.312E+02 0.296E+03 -.924E+00 -.311E+02 -.296E+03 0.226E-02 -.411E-01  
0.121E-01 0.503E-07 -.230E-05 0.124E-05  
0.133E+01 0.144E+03 -.282E+03 -.133E+01 -.144E+03 0.282E+03 0.497E-02 0.126E+00  
0.279E-01 -.206E-06 0.264E-06 -.690E-06  
0.342E+01 -.199E+02 -.285E+03 -.343E+01 0.199E+02 0.285E+03 0.136E-01 0.409E-01  
0.138E-01 -.172E-05 -.203E-05 0.125E-05  
0.139E+01 -.287E+02 0.294E+03 -.139E+01 0.287E+02 -.294E+03 -.348E-02 0.252E-01 -  
.309E-01 0.250E-07 -.226E-05 0.181E-05  
0.678E+00 0.139E+03 0.290E+03 -.678E+00 -.139E+03 -.290E+03 0.629E-03 0.103E+00 -  
.296E-01 -.368E-06 -.243E-05 0.582E-06  
0.160E+01 0.367E+02 -.287E+03 -.159E+01 -.367E+02 0.287E+03 -.127E-01 -.210E-01  
0.129E-01 -.601E-06 -.955E-06 0.762E-06  
0.612E+01 -.125E+03 -.271E+03 -.614E+01 0.125E+03 0.271E+03 0.219E-01 -.898E-01  
0.148E-01 -.162E-05 -.228E-05 0.141E-05  
0.368E+00 0.207E+03 0.280E+03 -.373E+00 -.207E+03 -.280E+03 0.119E-03 0.683E-01 -  
.366E-01 -.782E-06 -.194E-05 0.748E-06  
-.358E-01 0.319E+02 0.296E+03 0.271E-01 -.319E+02 -.296E+03 0.106E-01 -.363E-01

0.137E-01 0.184E-06 -.112E-05 0.341E-06  
0.210E+01 0.144E+03 -.281E+03 -.211E+01 -.144E+03 0.281E+03 0.121E-01 0.120E+00  
0.241E-01 -.887E-07 -.142E-05 0.384E-06  
0.303E+01 -.171E+02 -.283E+03 -.306E+01 0.171E+02 0.283E+03 0.242E-01 0.857E-01  
0.614E-01 -.943E-06 -.376E-05 0.774E-06  
0.106E+01 -.272E+02 0.294E+03 -.106E+01 0.272E+02 -.294E+03 0.289E-02 0.242E-01 -  
.377E-01 0.597E-06 -.151E-05 0.764E-06  
0.975E-01 0.140E+03 0.290E+03 -.991E-01 -.140E+03 -.290E+03 0.131E-02 0.107E+00 -  
.233E-01 -.661E-06 -.130E-05 0.102E-05  
0.277E+01 0.387E+02 -.286E+03 -.277E+01 -.387E+02 0.286E+03 0.103E-02 -.115E-01  
0.294E-01 -.828E-06 -.208E-05 0.990E-06  
0.597E+01 -.115E+03 -.267E+03 -.612E+01 0.115E+03 0.267E+03 0.152E+00 -.650E-03  
0.130E+00 -.259E-05 -.306E-05 0.468E-06  
-.242E+00 0.207E+03 0.280E+03 0.239E+00 -.207E+03 -.280E+03 0.439E-02 0.715E-01 -  
.388E-01 -.996E-06 -.785E-06 0.195E-05  
-.114E+01 0.314E+02 0.294E+03 0.113E+01 -.314E+02 -.294E+03 0.918E-02 -.312E-01  
0.528E-02 -.727E-07 0.229E-06 -.346E-06  
0.595E+00 0.144E+03 -.281E+03 -.612E+00 -.144E+03 0.281E+03 0.179E-01 0.125E+00  
0.437E-01 -.891E-06 -.200E-05 0.137E-05  
-.939E+00 -.159E+02 -.286E+03 0.931E+00 0.158E+02 0.286E+03 0.603E-02 0.900E-01  
0.805E-01 -.152E-05 -.420E-05 0.604E-06  
-.641E+00 -.265E+02 0.293E+03 0.637E+00 0.265E+02 -.293E+03 0.491E-02 0.233E-01 -

.272E-01 0.583E-06 -.850E-07 -.849E-06  
-.534E+00 0.139E+03 0.289E+03 0.530E+00 -.139E+03 -.289E+03 0.655E-02 0.114E+00 -  
.215E-01 -.539E-06 -.937E-07 0.160E-05  
0.779E+00 0.408E+02 -.287E+03 -.791E+00 -.408E+02 0.287E+03 0.525E-02 0.166E-02 -  
.190E-01 -.135E-05 -.353E-05 0.889E-06  
-.458E+00 -.113E+03 -.276E+03 0.424E+00 0.113E+03 0.277E+03 0.349E-01 0.589E-01 -  
.268E+00 -.123E-05 -.378E-05 0.734E-06  
-.572E+00 0.206E+03 0.279E+03 0.570E+00 -.206E+03 -.279E+03 0.115E-02 0.719E-01 -  
.456E-01 -.195E-06 -.241E-06 0.276E-05  
-.784E+00 0.304E+02 0.294E+03 0.788E+00 -.304E+02 -.294E+03 -.756E-02 -.309E-01 -  
.153E-02 -.241E-06 0.180E-06 -.339E-06  
-.123E+01 0.144E+03 -.281E+03 0.125E+01 -.145E+03 0.281E+03 -.159E-01 0.122E+00  
0.504E-01 0.419E-06 -.331E-05 0.140E-05  
-.366E+01 -.174E+02 -.283E+03 0.369E+01 0.173E+02 0.283E+03 -.307E-01 0.115E+00  
0.595E-01 0.138E-05 -.472E-05 0.785E-06  
-.130E+01 -.277E+02 0.291E+03 0.129E+01 0.277E+02 -.291E+03 -.133E-02 0.340E-01 -  
.220E-01 -.301E-06 0.572E-06 -.173E-05  
-.348E+00 0.139E+03 0.289E+03 0.347E+00 -.139E+03 -.289E+03 0.121E-04 0.111E+00 -  
.148E-01 0.140E-06 -.119E-06 0.183E-05  
-.830E+00 0.400E+02 -.287E+03 0.822E+00 -.400E+02 0.287E+03 0.125E-01 -.793E-02 -  
.181E-01 0.570E-06 -.423E-05 0.947E-06  
-.787E+01 -.119E+03 -.267E+03 0.806E+01 0.119E+03 0.267E+03 -.189E+00 0.138E-02

0.353E-01 0.221E-05 -.399E-05 0.593E-06  
-.410E+00 0.206E+03 0.279E+03 0.411E+00 -.206E+03 -.279E+03 -.281E-02 0.714E-01 -  
.466E-01 0.902E-06 -.902E-06 0.250E-05  
-.653E-01 0.300E+02 0.294E+03 0.750E-01 -.299E+02 -.294E+03 -.949E-02 -.348E-01  
0.106E-02 0.170E-07 -.104E-05 0.522E-06  
-.206E+01 0.145E+03 -.282E+03 0.208E+01 -.145E+03 0.282E+03 -.189E-01 0.132E+00  
0.257E-01 0.463E-06 -.239E-05 0.409E-06  
-.257E+01 -.208E+02 -.285E+03 0.259E+01 0.208E+02 0.285E+03 -.292E-01 0.405E-01  
0.319E-01 0.234E-05 -.281E-05 0.123E-05  
-.555E+00 -.290E+02 0.291E+03 0.560E+00 0.290E+02 -.291E+03 -.286E-02 0.291E-01 -  
.252E-01 -.490E-06 -.950E-07 -.940E-06  
0.579E-01 0.139E+03 0.289E+03 -.580E-01 -.139E+03 -.289E+03 -.354E-03 0.109E+00 -  
.209E-01 0.875E-06 -.121E-05 0.154E-05  
-.290E+01 0.378E+02 -.286E+03 0.291E+01 -.378E+02 0.286E+03 -.147E-01 -.431E-02  
0.211E-01 0.122E-05 -.280E-05 0.878E-06  
-.514E+01 -.128E+03 -.271E+03 0.519E+01 0.128E+03 0.271E+03 -.463E-01 -.866E-01  
0.381E-01 0.262E-05 -.315E-05 0.147E-05  
0.395E+00 -.137E+03 0.280E+03 -.387E+00 0.137E+03 -.280E+03 -.971E-02 -.128E+00 -  
.158E-01 -.115E-05 -.898E-06 0.238E-06  
0.193E+01 -.343E+03 0.233E+03 -.194E+01 0.344E+03 -.233E+03 0.910E-02 -.461E+00 -  
.549E-01 -.751E-06 -.318E-06 0.110E-05  
-.253E+01 -.197E+03 -.259E+03 0.254E+01 0.197E+03 0.259E+03 -.941E-02 -.198E+00

0.371E-01 0.198E-05 -.360E-05 0.202E-05  
0.691E+01 -.447E+03 -.198E+03 -.693E+01 0.448E+03 0.198E+03 0.966E-02 -.112E+01

0.887E-01 0.174E-05 0.941E-06 0.147E-05  
-.476E+00 -.451E+03 0.204E+03 0.477E+00 0.452E+03 -.204E+03 -.213E-02 -.108E+01 -

.113E+00 -.181E-05 -.447E-06 -.983E-06  
0.171E+01 -.203E+03 0.269E+03 -.170E+01 0.203E+03 -.269E+03 -.481E-02 -.927E-01 -

.322E-01 -.697E-06 -.127E-05 0.139E-05  
-.211E+01 -.338E+03 -.222E+03 0.216E+01 0.338E+03 0.222E+03 -.441E-01 -.605E+00

0.540E-01 0.132E-05 -.558E-06 0.151E-05  
0.218E+01 -.136E+03 0.282E+03 -.218E+01 0.136E+03 -.282E+03 -.634E-02 -.126E+00 -

.962E-02 0.135E-06 -.153E-05 0.205E-05  
0.672E+01 -.339E+03 0.238E+03 -.671E+01 0.340E+03 -.238E+03 -.126E-01 -.461E+00 -

.462E-01 0.163E-05 0.271E-06 0.170E-05  
0.679E+01 -.193E+03 -.259E+03 -.680E+01 0.193E+03 0.258E+03 0.111E-01 -.146E+00

0.634E-01 -.395E-06 -.287E-05 0.199E-05  
0.313E+02 -.427E+03 -.198E+03 -.313E+02 0.428E+03 0.197E+03 0.727E-01 -.968E+00

0.135E+00 -.179E-05 0.281E-05 0.309E-06  
0.544E+01 -.449E+03 0.209E+03 -.544E+01 0.450E+03 -.209E+03 0.654E-03 -.108E+01 -

.801E-01 0.779E-06 0.268E-06 0.212E-05  
0.369E+01 -.201E+03 0.272E+03 -.368E+01 0.201E+03 -.272E+03 -.701E-03 -.976E-01 -

.308E-01 0.112E-05 -.870E-06 0.165E-05  
0.124E+02 -.332E+03 -.223E+03 -.125E+02 0.332E+03 0.223E+03 0.120E+00 -.535E+00

0.316E-01 0.926E-06 0.481E-06 0.143E-05  
0.219E+01 -.133E+03 0.283E+03 -.219E+01 0.133E+03 -.283E+03 0.578E-03 -.128E+00 -  
.463E-02 0.134E-05 -.530E-06 0.463E-06  
0.494E+01 -.332E+03 0.245E+03 -.490E+01 0.332E+03 -.245E+03 -.319E-01 -.476E+00 -  
.377E-01 0.211E-05 0.102E-05 -.198E-05  
0.112E+02 -.182E+03 -.258E+03 -.113E+02 0.182E+03 0.258E+03 0.469E-01 -.986E-01 -  
.105E+00 -.241E-05 -.302E-05 0.847E-06  
0.319E+02 -.399E+03 -.175E+03 -.321E+02 0.401E+03 0.174E+03 0.292E+00 -.140E+01  
0.133E+01 0.465E-05 0.588E-05 0.352E-05  
0.931E+01 -.443E+03 0.219E+03 -.931E+01 0.444E+03 -.219E+03 -.546E-02 -.109E+01 -  
.483E-01 0.263E-05 0.914E-06 0.479E-06  
0.170E+01 -.196E+03 0.273E+03 -.170E+01 0.197E+03 -.273E+03 0.551E-02 -.109E+00 -  
.513E-01 0.177E-05 0.499E-06 -.148E-05  
0.172E+02 -.310E+03 -.216E+03 -.175E+02 0.310E+03 0.216E+03 0.324E+00 -.219E+00  
0.123E+00 -.164E-05 0.165E-05 0.109E-05  
-.103E+01 -.132E+03 0.281E+03 0.102E+01 0.132E+03 -.281E+03 0.103E-01 -.127E+00 -  
.780E-04 0.117E-05 0.700E-06 -.257E-05  
-.511E+01 -.331E+03 0.239E+03 0.511E+01 0.332E+03 -.239E+03 0.877E-02 -.494E+00 -  
.422E-01 0.890E-06 0.157E-05 -.558E-05  
0.159E+01 -.169E+03 -.261E+03 -.171E+01 0.169E+03 0.261E+03 0.116E+00 0.365E+00 -  
.980E-01 -.177E-05 0.115E-07 0.153E-05  
-.650E+01 -.301E+03 -.189E+03 0.602E+01 0.296E+03 0.185E+03 0.469E+00 0.502E+01

0.412E+01    -.270E-05 0.840E-05 0.478E-05  
              -.604E+00 -.436E+03 0.227E+03    0.602E+00 0.437E+03 -.227E+03    0.157E-02 -.120E+01 -  
.483E-01    0.179E-05 0.134E-05 -.394E-05  
              -.302E+01 -.197E+03 0.268E+03    0.300E+01 0.197E+03 -.268E+03    0.146E-01 -.112E+00 -  
.431E-01    0.625E-06 0.116E-05 -.463E-05  
              0.341E+01 -.280E+03 -.215E+03    -.532E+01 0.280E+03 0.214E+03    0.191E+01 0.639E+00  
0.824E+00    0.995E-06 0.914E-05 0.502E-05  
              -.274E+01 -.134E+03 0.277E+03    0.274E+01 0.134E+03 -.277E+03    0.246E-02 -.123E+00 -  
.187E-01    -.329E-06 0.115E-05 -.425E-05  
              -.602E+01 -.338E+03 0.230E+03    0.601E+01 0.339E+03 -.230E+03    0.112E-01 -.494E+00 -  
.463E-01    -.153E-05 0.105E-05 -.609E-05  
              -.651E+01 -.171E+03 -.257E+03    0.659E+01 0.170E+03 0.257E+03    -.760E-01 0.480E+00  
0.132E-01    -.506E-06 -.115E-05 0.174E-05  
              -.443E+02 -.422E+03 -.184E+03    0.449E+02 0.423E+03 0.183E+03    -.563E+00 -.109E+01  
0.631E+00    -.379E-05 0.633E-05 0.404E-05  
              -.867E+01 -.441E+03 0.211E+03    0.866E+01 0.442E+03 -.211E+03    0.143E-01 -.111E+01 -  
.757E-01    -.773E-06 0.107E-05 -.603E-05  
              -.293E+01 -.201E+03 0.265E+03    0.294E+01 0.201E+03 -.265E+03    -.918E-02 -.110E+00 -  
.206E-01    -.102E-05 0.103E-05 -.498E-05  
              -.145E+02 -.290E+03 -.209E+03    0.165E+02 0.289E+03 0.209E+03    -.197E+01 0.602E+00  
0.785E+00    -.268E-05 0.851E-05 0.559E-05  
              -.139E+01 -.136E+03 0.277E+03    0.140E+01 0.136E+03 -.277E+03    -.102E-01 -.125E+00 -

|           |           |           |           |           |           |           |           |           |   |
|-----------|-----------|-----------|-----------|-----------|-----------|-----------|-----------|-----------|---|
| .241E-01  | -.109E-05 | 0.487E-06 | -.298E-05 |           |           |           |           |           |   |
|           | -.280E+01 | -.343E+03 | 0.230E+03 | 0.278E+01 | 0.343E+03 | -.230E+03 | 0.234E-01 | -.473E+00 | - |
| .595E-01  | -.218E-05 | -.601E-07 | -.307E-05 |           |           |           |           |           |   |
|           | -.104E+02 | -.189E+03 | -.258E+03 | 0.105E+02 | 0.189E+03 | 0.258E+03 | -.768E-01 | -.139E+00 | - |
| .521E-01  | 0.313E-05 | -.360E-05 | 0.843E-06 |           |           |           |           |           |   |
|           | -.150E+02 | -.446E+03 | -.196E+03 | 0.150E+02 | 0.447E+03 | 0.196E+03 | -.692E-01 | -.112E+01 |   |
| 0.987E-01 | 0.192E-05 | 0.186E-05 | 0.783E-06 |           |           |           |           |           |   |
|           | -.551E+01 | -.448E+03 | 0.204E+03 | 0.552E+01 | 0.449E+03 | -.204E+03 | -.490E-02 | -.108E+01 | - |
| .125E+00  | -.249E-05 | -.132E-06 | -.507E-05 |           |           |           |           |           |   |
|           | -.920E+00 | -.203E+03 | 0.267E+03 | 0.929E+00 | 0.203E+03 | -.267E+03 | -.912E-02 | -.102E+00 | - |
| .319E-01  | -.174E-05 | -.236E-06 | -.203E-05 |           |           |           |           |           |   |
|           | -.163E+02 | -.329E+03 | -.218E+03 | 0.167E+02 | 0.329E+03 | 0.218E+03 | -.360E+00 | -.480E+00 |   |
| 0.428E-01 | 0.129E-05 | 0.171E-05 | 0.133E-05 |           |           |           |           |           |   |
|           | -.291E+01 | -.253E+03 | -.195E+03 | 0.184E+01 | 0.244E+03 | 0.189E+03 | 0.989E+00 | 0.789E+01 |   |
| 0.478E+01 | 0.703E-06 | 0.155E-04 | 0.138E-04 |           |           |           |           |           |   |
|           | 0.533E+02 | -.518E+03 | -.137E+03 | -.544E+02 | 0.522E+03 | 0.141E+03 | 0.105E+01 | -.395E+01 | - |
| .382E+01  | 0.397E-05 | -.286E-05 | 0.313E-05 |           |           |           |           |           |   |
|           | -.472E+02 | -.590E+03 | -.446E+03 | 0.532E+02 | 0.643E+03 | 0.480E+03 | -.596E+01 | -.518E+02 | - |
| .340E+02  | -.111E-05 | -.523E-05 | -.165E-05 |           |           |           |           |           |   |
| -----     |           |           |           |           |           |           |           |           |   |
|           | 0.447E+01 | 0.286E+02 | 0.221E+02 | -.291E-12 | 0.693E-11 | 0.142E-11 | -.451E+01 | -.286E+02 | - |
| .221E+02  | 0.383E-05 | -.550E-04 | 0.102E-03 |           |           |           |           |           |   |

POSITION

TOTAL-FORCE (eV/Angst)

-----

|          |          |         |           |           |           |
|----------|----------|---------|-----------|-----------|-----------|
| 1.24575  | 4.02870  | 5.43979 | 0.000048  | 0.000996  | -0.000420 |
| 1.21024  | 4.07581  | 8.43726 | -0.000975 | 0.002561  | -0.001203 |
| 3.70862  | 4.02890  | 5.43965 | 0.000312  | 0.001868  | -0.001105 |
| 3.67998  | 4.07733  | 8.43690 | -0.004033 | -0.000471 | -0.002960 |
| 6.17157  | 4.02854  | 5.43942 | -0.000005 | -0.000162 | -0.001765 |
| 6.14482  | 4.08292  | 8.43295 | -0.002835 | -0.003356 | -0.003257 |
| 8.63513  | 4.02801  | 5.43869 | 0.000780  | -0.000468 | -0.002016 |
| 8.60339  | 4.08732  | 8.43089 | -0.000133 | -0.001225 | -0.002289 |
| 11.09928 | 4.02784  | 5.43885 | 0.000879  | 0.001946  | -0.002727 |
| 11.06021 | 4.08619  | 8.43099 | -0.001740 | 0.000655  | -0.000723 |
| 13.56311 | 4.02807  | 5.43972 | 0.000340  | 0.001597  | -0.001634 |
| 13.52141 | 4.08047  | 8.43349 | 0.000413  | -0.002307 | 0.000225  |
| 2.44241  | 15.48073 | 8.85224 | -0.000619 | -0.005204 | 0.002228  |
| 0.01714  | 15.44624 | 5.32469 | 0.000363  | 0.001540  | -0.001194 |
| 4.86040  | 15.47728 | 8.86623 | 0.000880  | 0.000346  | -0.000480 |
| 2.48016  | 15.44854 | 5.27562 | 0.000364  | -0.001203 | -0.000501 |
| 4.94382  | 15.44925 | 5.24869 | 0.001747  | -0.002950 | 0.000241  |
| 12.31531 | 15.48242 | 9.00211 | -0.002638 | 0.002021  | 0.004781  |

|          |          |         |           |           |           |
|----------|----------|---------|-----------|-----------|-----------|
| 9.86772  | 15.44556 | 5.34176 | 0.000432  | -0.001061 | 0.000878  |
| 14.76279 | 15.48245 | 8.89951 | -0.006013 | -0.000350 | 0.005369  |
| 12.33384 | 15.44510 | 5.36128 | 0.001385  | -0.003197 | -0.001303 |
| 7.40743  | 15.44616 | 5.26463 | 0.002401  | 0.001621  | 0.001339  |
| 6.44846  | 16.34427 | 7.40648 | -0.001481 | -0.000341 | 0.003869  |
| 8.60064  | 16.47644 | 7.89249 | 0.005279  | 0.001497  | 0.004161  |
| 1.24544  | 5.11881  | 5.35500 | 0.000955  | 0.000245  | -0.002527 |
| 2.44348  | 5.83889  | 8.62292 | 0.002426  | -0.004469 | 0.001184  |
| 0.01380  | 5.79530  | 5.28573 | 0.002078  | -0.002539 | 0.000444  |
| 1.21063  | 5.16420  | 8.54151 | 0.000246  | -0.000530 | -0.001877 |
| 2.44351  | 7.27931  | 8.74832 | -0.000082 | -0.001251 | -0.000152 |
| 3.70866  | 5.11896  | 5.35390 | -0.000418 | -0.001545 | 0.000263  |
| 4.90800  | 5.84315  | 8.62123 | -0.001098 | 0.003815  | -0.000812 |
| 2.47701  | 5.79561  | 5.28397 | 0.001451  | -0.000676 | -0.002634 |
| 3.67679  | 5.16572  | 8.54000 | -0.000109 | 0.001619  | -0.000026 |
| 4.90764  | 7.28398  | 8.74777 | 0.000742  | -0.000606 | 0.001033  |
| 6.17184  | 5.11860  | 5.35433 | 0.001487  | 0.000480  | 0.000824  |
| 7.37096  | 5.84929  | 8.62094 | -0.000596 | 0.007042  | -0.002486 |
| 4.94029  | 5.79548  | 5.28340 | 0.000601  | -0.002772 | -0.001202 |
| 6.14080  | 5.17108  | 8.53715 | -0.002516 | 0.002549  | 0.002485  |
| 7.37071  | 7.28983  | 8.75132 | -0.001936 | 0.001641  | 0.000117  |
| 8.63543  | 5.11820  | 5.35521 | 0.001250  | 0.001453  | -0.001146 |

|          |          |         |           |           |           |
|----------|----------|---------|-----------|-----------|-----------|
| 9.83233  | 5.85166  | 8.62337 | 0.002787  | 0.000497  | -0.001124 |
| 7.40374  | 5.79498  | 5.28512 | 0.003449  | -0.002781 | -0.001366 |
| 8.60194  | 5.17528  | 8.53759 | -0.001894 | -0.000385 | -0.000179 |
| 9.83204  | 7.29110  | 8.75719 | -0.001853 | -0.002481 | -0.002453 |
| 11.09930 | 5.11814  | 5.35578 | -0.000861 | -0.003242 | -0.001441 |
| 12.29449 | 5.84673  | 8.62385 | 0.000033  | 0.005700  | -0.002231 |
| 9.86750  | 5.79468  | 5.28678 | -0.000748 | -0.000808 | 0.001522  |
| 11.06261 | 5.17409  | 8.53894 | 0.002670  | 0.002734  | -0.000361 |
| 12.29428 | 7.28729  | 8.75533 | -0.004570 | 0.001231  | -0.001539 |
| 13.56278 | 5.11829  | 5.35605 | 0.002665  | 0.000627  | -0.002056 |
| 14.75895 | 5.83988  | 8.62434 | -0.000185 | -0.002683 | -0.002253 |
| 12.33118 | 5.79480  | 5.28692 | -0.004500 | -0.001561 | 0.002564  |
| 13.52535 | 5.16844  | 8.54022 | -0.003526 | 0.003816  | -0.001405 |
| 14.75917 | 7.28012  | 8.75179 | 0.000902  | 0.002540  | -0.000704 |
| 0.01434  | 7.23830  | 5.19017 | 0.000098  | -0.000208 | 0.000041  |
| 1.24689  | 9.38061  | 5.13160 | 0.000545  | -0.001853 | -0.000038 |
| 1.21085  | 7.98059  | 8.79588 | -0.000938 | -0.000504 | 0.001498  |
| 2.44214  | 10.12243 | 8.87141 | -0.000913 | 0.002986  | -0.005031 |
| 0.01532  | 10.08686 | 5.14049 | -0.002037 | -0.000153 | -0.002429 |
| 1.24606  | 7.94244  | 5.15775 | 0.002009  | -0.002620 | 0.000802  |
| 1.21082  | 9.41592  | 8.85782 | -0.000702 | 0.004508  | 0.000157  |
| 2.44072  | 11.55513 | 8.88414 | -0.006183 | -0.002536 | 0.001627  |

|         |          |         |           |           |           |
|---------|----------|---------|-----------|-----------|-----------|
| 2.47747 | 7.23842  | 5.18585 | 0.002805  | 0.002878  | 0.001276  |
| 3.70997 | 9.38055  | 5.12566 | -0.001069 | -0.003000 | 0.000008  |
| 3.67534 | 7.98360  | 8.79349 | -0.000521 | 0.001019  | 0.000907  |
| 4.90487 | 10.12925 | 8.87518 | 0.000285  | -0.000491 | -0.000038 |
| 2.47867 | 10.08713 | 5.12695 | -0.002268 | 0.001493  | 0.000734  |
| 3.70939 | 7.94242  | 5.15441 | 0.000814  | -0.004029 | -0.001727 |
| 3.67589 | 9.41970  | 8.85445 | -0.001499 | 0.002036  | -0.000160 |
| 4.90263 | 11.56506 | 8.89086 | -0.000578 | 0.001884  | 0.000863  |
| 4.94085 | 7.23830  | 5.18552 | -0.004695 | 0.002252  | 0.000795  |
| 6.17318 | 9.38002  | 5.13173 | 0.002054  | 0.002109  | 0.001796  |
| 6.13864 | 7.99044  | 8.79647 | 0.002401  | -0.000435 | -0.001670 |
| 7.36780 | 10.13760 | 8.89473 | -0.000924 | 0.002933  | 0.000619  |
| 4.94196 | 10.08682 | 5.12700 | 0.004127  | 0.001461  | -0.001185 |
| 6.17284 | 7.94199  | 5.15766 | -0.000053 | 0.000534  | 0.003002  |
| 6.13939 | 9.42660  | 8.86164 | 0.000765  | -0.000483 | -0.002120 |
| 7.36410 | 11.57721 | 8.92935 | 0.000172  | -0.002602 | 0.002510  |
| 7.40426 | 7.23794  | 5.19012 | 0.002154  | 0.001767  | 0.001033  |
| 8.63700 | 9.37970  | 5.14543 | -0.000524 | 0.002957  | 0.000909  |
| 8.60086 | 7.99568  | 8.80617 | 0.001076  | -0.000758 | -0.001180 |
| 9.83068 | 10.14286 | 8.92842 | -0.002260 | 0.002038  | -0.000445 |
| 7.40553 | 10.08627 | 5.14064 | 0.001187  | -0.003611 | 0.003117  |
| 8.63637 | 7.94166  | 5.16555 | 0.002612  | 0.001759  | -0.001439 |

|          |          |         |           |           |           |
|----------|----------|---------|-----------|-----------|-----------|
| 8.60077  | 9.43254  | 8.88532 | -0.006120 | 0.002633  | -0.001307 |
| 9.82927  | 11.58244 | 9.00096 | 0.001081  | 0.004460  | 0.001417  |
| 9.86805  | 7.23787  | 5.19489 | -0.000357 | 0.000098  | -0.000254 |
| 11.10106 | 9.37979  | 5.15156 | -0.003822 | -0.001021 | 0.000620  |
| 11.06331 | 7.99411  | 8.80818 | -0.000196 | -0.001826 | 0.000008  |
| 12.29815 | 10.12943 | 8.90340 | -0.000518 | -0.001285 | 0.001463  |
| 9.86930  | 10.08593 | 5.15631 | -0.005454 | -0.001492 | 0.001378  |
| 11.10021 | 7.94175  | 5.16862 | -0.000609 | -0.003102 | 0.001361  |
| 11.06206 | 9.43062  | 8.88839 | 0.004659  | 0.002032  | 0.002015  |
| 12.30255 | 11.56557 | 8.94694 | 0.002639  | -0.001068 | -0.001893 |
| 12.33169 | 7.23799  | 5.19447 | -0.001021 | 0.000242  | -0.001792 |
| 13.56437 | 9.38021  | 5.14435 | 0.000723  | 0.001653  | -0.000614 |
| 13.52754 | 7.98555  | 8.80171 | -0.000725 | -0.002685 | -0.003126 |
| 14.76233 | 10.12320 | 8.88285 | -0.005210 | 0.000687  | -0.001660 |
| 12.33257 | 10.08637 | 5.15511 | 0.002646  | 0.000506  | -0.001570 |
| 13.56350 | 7.94214  | 5.16485 | -0.000087 | -0.000909 | -0.000401 |
| 13.52731 | 9.42040  | 8.86925 | -0.000177 | 0.003093  | -0.000443 |
| 14.76430 | 11.55727 | 8.90646 | -0.002149 | -0.000356 | 0.001842  |
| 0.01611  | 11.52516 | 5.16621 | -0.001072 | -0.002540 | 0.000355  |
| 1.24770  | 13.67535 | 5.22209 | 0.001870  | -0.002135 | -0.002505 |
| 1.21217  | 12.26335 | 8.89409 | 0.000745  | -0.000466 | 0.001111  |
| 2.43998  | 14.38728 | 8.86748 | -0.002666 | -0.000044 | 0.000783  |

|         |          |         |           |           |           |
|---------|----------|---------|-----------|-----------|-----------|
| 0.01699 | 14.35408 | 5.27295 | -0.000470 | -0.000924 | -0.002034 |
| 1.24794 | 12.22963 | 5.17275 | 0.001047  | 0.000865  | -0.001392 |
| 1.21434 | 13.70818 | 8.88771 | 0.001694  | 0.003295  | 0.003638  |
| 2.47958 | 11.52580 | 5.14547 | -0.001613 | -0.000182 | -0.001523 |
| 3.71218 | 13.67636 | 5.19535 | 0.004555  | 0.000794  | 0.001068  |
| 3.66932 | 12.26248 | 8.88184 | -0.002115 | -0.000120 | -0.000663 |
| 4.89370 | 14.38589 | 8.86075 | 0.003394  | -0.002885 | -0.002297 |
| 2.48000 | 14.35596 | 5.23149 | 0.001294  | -0.001430 | 0.001627  |
| 3.71150 | 12.23022 | 5.15602 | 0.000902  | -0.004508 | 0.000973  |
| 3.66212 | 13.70366 | 8.87117 | -0.004951 | 0.005162  | -0.000814 |
| 4.94290 | 11.52542 | 5.14351 | -0.000051 | -0.001747 | -0.001637 |
| 6.17627 | 13.67505 | 5.20032 | 0.000882  | 0.000877  | 0.000057  |
| 6.13145 | 12.27911 | 8.90591 | 0.005218  | 0.006552  | 0.004489  |
| 7.36614 | 14.42967 | 8.88203 | -0.002236 | -0.002924 | -0.000480 |
| 4.94347 | 14.35627 | 5.21375 | 0.000158  | -0.002172 | 0.001091  |
| 6.17493 | 12.22917 | 5.16623 | -0.001405 | -0.001070 | 0.001509  |
| 6.11879 | 13.72336 | 8.87765 | 0.005267  | 0.003331  | 0.001166  |
| 7.40625 | 11.52413 | 5.16368 | 0.000929  | -0.003293 | 0.000316  |
| 8.63876 | 13.67323 | 5.24377 | 0.001915  | 0.002421  | -0.001338 |
| 8.58939 | 12.29067 | 9.00208 | -0.004017 | 0.000009  | -0.002177 |
| 9.83855 | 14.39048 | 9.30305 | -0.001465 | -0.028817 | -0.007376 |
| 7.40672 | 14.35386 | 5.23530 | -0.001128 | -0.000802 | -0.000780 |

|          |          |          |           |           |           |
|----------|----------|----------|-----------|-----------|-----------|
| 8.63820  | 12.22778 | 5.19800  | 0.000303  | -0.001241 | 0.001011  |
| 8.55571  | 13.73596 | 9.04598  | 0.009008  | -0.004878 | 0.012772  |
| 9.86985  | 11.52338 | 5.18893  | 0.001772  | -0.001919 | -0.000146 |
| 11.10099 | 13.67352 | 5.27669  | 0.003129  | -0.000571 | -0.001012 |
| 11.07378 | 12.27333 | 9.00891  | -0.000615 | 0.003336  | -0.004110 |
| 12.30694 | 14.38896 | 9.00333  | -0.000002 | -0.003883 | 0.001007  |
| 9.86934  | 14.35300 | 5.29564  | 0.002958  | -0.000358 | -0.000199 |
| 11.10161 | 12.22804 | 5.21650  | -0.001120 | -0.002737 | 0.001026  |
| 11.11464 | 13.70636 | 9.07877  | -0.004949 | 0.001616  | 0.007275  |
| 12.33326 | 11.52411 | 5.18815  | -0.000923 | 0.000322  | 0.000502  |
| 13.56430 | 13.67399 | 5.25995  | 0.001604  | 0.000212  | 0.000064  |
| 13.53626 | 12.26601 | 8.93587  | -0.002239 | 0.004156  | 0.001899  |
| 14.76266 | 14.38906 | 8.90426  | -0.002785 | 0.000011  | 0.003752  |
| 12.33397 | 14.35288 | 5.30710  | 0.002752  | -0.002234 | -0.001828 |
| 13.56505 | 12.22870 | 5.20105  | 0.000085  | 0.000097  | -0.001167 |
| 13.54921 | 13.70690 | 8.94399  | -0.001244 | -0.001554 | 0.000850  |
| 9.91126  | 15.53185 | 9.99472  | -0.067463 | -0.612990 | -0.450926 |
| 7.28864  | 16.40884 | 8.69813  | -0.003844 | -0.006340 | -0.007187 |
| 10.02526 | 16.50365 | 10.62998 | 0.079652  | 0.646707  | 0.461999  |

-----

|              |  |  |           |          |           |
|--------------|--|--|-----------|----------|-----------|
| total drift: |  |  | -0.045009 | 0.026010 | -0.018126 |
|--------------|--|--|-----------|----------|-----------|

---

FREE ENERGIE OF THE ION-ELECTRON SYSTEM (eV)

---

free energy TOTEN = -1209.38581936 eV

energy without entropy= -1209.38581936 energy(sigma->0) = -1209.38581936

d Force =-0.1156613E-03[-0.139E-01, 0.136E-01] d Energy =-0.2619393E-04-0.895E-04

d Force =-0.1441507E+02[-0.144E+02,-0.144E+02] d Ewald =-0.1441624E+02 0.117E-02

---

POTLOK: cpu time 0.1734: real time 0.1747

---

stress matrix after NEB project (eV)

|           |           |           |
|-----------|-----------|-----------|
| -17.71170 | -0.16675  | 0.10826   |
| -0.16675  | -14.61635 | 0.88807   |
| 0.10826   | 0.88807   | -18.76538 |

FORCES: max atom, RMS      0.798760    0.091163

FORCE total and by dimension      1.105288    0.646707

Stress total and by dimension    29.683967    18.765379

Finite differences progress:

Degree of freedom:    6/ 6

Displacement:        2/ 2

Total:                12/ 12

SECOND DERIVATIVES (NOT SYMMETRIZED)

-----

|      | 145X       | 145Y       | 145Z       | 147X      | 147Y       | 147Z       |
|------|------------|------------|------------|-----------|------------|------------|
| 145X | -14.344316 | -8.619292  | -5.642213  | 5.387912  | 6.720885   | 4.507638   |
| 145Y | -8.667646  | -98.734334 | -59.519549 | 7.136466  | 62.909021  | 40.038571  |
| 145Z | -5.655137  | -59.500180 | -45.396676 | 4.651738  | 39.828980  | 30.215045  |
| 147X | 5.390744   | 7.120607   | 4.646428   | -3.238222 | -7.284748  | -4.986668  |
| 147Y | 6.739275   | 62.913522  | 39.876533  | -7.314380 | -64.999566 | -42.058262 |

147Z      4.513933    39.988644    30.217639    -4.997413    -42.002149    -30.542910

Eigenvectors and eigenvalues of the dynamical matrix

-----

1 f =    62.138107 THz    390.425242 2PiTHz 2072.704086 cm-1    256.982647 meV

|           | X         | Y        | Z | dx | dy | dz |
|-----------|-----------|----------|---|----|----|----|
| 1.245750  | 4.028696  | 5.439790 |   | 0  | 0  | 0  |
| 1.210240  | 4.075813  | 8.437264 |   | 0  | 0  | 0  |
| 3.708620  | 4.028896  | 5.439647 |   | 0  | 0  | 0  |
| 3.679981  | 4.077333  | 8.436900 |   | 0  | 0  | 0  |
| 6.171574  | 4.028537  | 5.439423 |   | 0  | 0  | 0  |
| 6.144822  | 4.082922  | 8.432952 |   | 0  | 0  | 0  |
| 8.635129  | 4.028007  | 5.438685 |   | 0  | 0  | 0  |
| 8.603386  | 4.087320  | 8.430892 |   | 0  | 0  | 0  |
| 11.099276 | 4.027838  | 5.438849 |   | 0  | 0  | 0  |
| 11.060208 | 4.086191  | 8.430988 |   | 0  | 0  | 0  |
| 13.563114 | 4.028068  | 5.439721 |   | 0  | 0  | 0  |
| 13.521407 | 4.080469  | 8.433485 |   | 0  | 0  | 0  |
| 2.442410  | 15.480732 | 8.852243 |   | 0  | 0  | 0  |

|           |           |          |   |   |   |
|-----------|-----------|----------|---|---|---|
| 0.017143  | 15.446242 | 5.324686 | 0 | 0 | 0 |
| 4.860405  | 15.477285 | 8.866232 | 0 | 0 | 0 |
| 2.480161  | 15.448544 | 5.275619 | 0 | 0 | 0 |
| 4.943820  | 15.449251 | 5.248689 | 0 | 0 | 0 |
| 12.315308 | 15.482418 | 9.002109 | 0 | 0 | 0 |
| 9.867716  | 15.445563 | 5.341755 | 0 | 0 | 0 |
| 14.762794 | 15.482453 | 8.899515 | 0 | 0 | 0 |
| 12.333845 | 15.445098 | 5.361284 | 0 | 0 | 0 |
| 7.407428  | 15.446161 | 5.264635 | 0 | 0 | 0 |
| 6.448461  | 16.344273 | 7.406481 | 0 | 0 | 0 |
| 8.600641  | 16.476444 | 7.892492 | 0 | 0 | 0 |
| 1.245442  | 5.118809  | 5.355005 | 0 | 0 | 0 |
| 2.443484  | 5.838886  | 8.622924 | 0 | 0 | 0 |
| 0.013795  | 5.795296  | 5.285730 | 0 | 0 | 0 |
| 1.210631  | 5.164204  | 8.541507 | 0 | 0 | 0 |
| 2.443506  | 7.279307  | 8.748318 | 0 | 0 | 0 |
| 3.708657  | 5.118963  | 5.353897 | 0 | 0 | 0 |
| 4.907998  | 5.843148  | 8.621230 | 0 | 0 | 0 |
| 2.477011  | 5.795606  | 5.283967 | 0 | 0 | 0 |
| 3.676791  | 5.165724  | 8.540005 | 0 | 0 | 0 |
| 4.907637  | 7.283976  | 8.747768 | 0 | 0 | 0 |
| 6.171844  | 5.118599  | 5.354330 | 0 | 0 | 0 |

|           |          |          |   |   |   |
|-----------|----------|----------|---|---|---|
| 7.370958  | 5.849291 | 8.620941 | 0 | 0 | 0 |
| 4.940290  | 5.795478 | 5.283402 | 0 | 0 | 0 |
| 6.140801  | 5.171085 | 8.537152 | 0 | 0 | 0 |
| 7.370710  | 7.289828 | 8.751319 | 0 | 0 | 0 |
| 8.635429  | 5.118198 | 5.355206 | 0 | 0 | 0 |
| 9.832333  | 5.851658 | 8.623372 | 0 | 0 | 0 |
| 7.403740  | 5.794978 | 5.285116 | 0 | 0 | 0 |
| 8.601944  | 5.175280 | 8.537586 | 0 | 0 | 0 |
| 9.832040  | 7.291102 | 8.757194 | 0 | 0 | 0 |
| 11.099301 | 5.118139 | 5.355778 | 0 | 0 | 0 |
| 12.294487 | 5.846734 | 8.623846 | 0 | 0 | 0 |
| 9.867501  | 5.794678 | 5.286784 | 0 | 0 | 0 |
| 11.062615 | 5.174090 | 8.538935 | 0 | 0 | 0 |
| 12.294275 | 7.287294 | 8.755327 | 0 | 0 | 0 |
| 13.562782 | 5.118287 | 5.356054 | 0 | 0 | 0 |
| 14.758955 | 5.839879 | 8.624340 | 0 | 0 | 0 |
| 12.331181 | 5.794804 | 5.286924 | 0 | 0 | 0 |
| 13.525352 | 5.168439 | 8.540216 | 0 | 0 | 0 |
| 14.759167 | 7.280119 | 8.751789 | 0 | 0 | 0 |
| 0.014336  | 7.238301 | 5.190167 | 0 | 0 | 0 |
| 1.246890  | 9.380615 | 5.131604 | 0 | 0 | 0 |
| 1.210852  | 7.980592 | 8.795883 | 0 | 0 | 0 |

|          |           |          |   |   |   |
|----------|-----------|----------|---|---|---|
| 2.442140 | 10.122434 | 8.871408 | 0 | 0 | 0 |
| 0.015317 | 10.086865 | 5.140485 | 0 | 0 | 0 |
| 1.246057 | 7.942443  | 5.157748 | 0 | 0 | 0 |
| 1.210824 | 9.415918  | 8.857817 | 0 | 0 | 0 |
| 2.440724 | 11.555126 | 8.884137 | 0 | 0 | 0 |
| 2.477470 | 7.238419  | 5.185851 | 0 | 0 | 0 |
| 3.709968 | 9.380553  | 5.125659 | 0 | 0 | 0 |
| 3.675342 | 7.983601  | 8.793493 | 0 | 0 | 0 |
| 4.904874 | 10.129253 | 8.875180 | 0 | 0 | 0 |
| 2.478671 | 10.087127 | 5.126952 | 0 | 0 | 0 |
| 3.709392 | 7.942417  | 5.154413 | 0 | 0 | 0 |
| 3.675893 | 9.419704  | 8.854452 | 0 | 0 | 0 |
| 4.902634 | 11.565058 | 8.890860 | 0 | 0 | 0 |
| 4.940845 | 7.238299  | 5.185525 | 0 | 0 | 0 |
| 6.173182 | 9.380022  | 5.131732 | 0 | 0 | 0 |
| 6.138637 | 7.990443  | 8.796473 | 0 | 0 | 0 |
| 7.367803 | 10.137604 | 8.894732 | 0 | 0 | 0 |
| 4.941960 | 10.086817 | 5.126998 | 0 | 0 | 0 |
| 6.172836 | 7.941986  | 5.157656 | 0 | 0 | 0 |
| 6.139386 | 9.426599  | 8.861638 | 0 | 0 | 0 |
| 7.364099 | 11.577214 | 8.929347 | 0 | 0 | 0 |
| 7.404261 | 7.237943  | 5.190115 | 0 | 0 | 0 |

|           |           |          |   |   |   |
|-----------|-----------|----------|---|---|---|
| 8.637001  | 9.379701  | 5.145427 | 0 | 0 | 0 |
| 8.600855  | 7.995677  | 8.806165 | 0 | 0 | 0 |
| 9.830681  | 10.142862 | 8.928417 | 0 | 0 | 0 |
| 7.405532  | 10.086269 | 5.140638 | 0 | 0 | 0 |
| 8.636371  | 7.941660  | 5.165549 | 0 | 0 | 0 |
| 8.600773  | 9.432544  | 8.885323 | 0 | 0 | 0 |
| 9.829269  | 11.582438 | 9.000960 | 0 | 0 | 0 |
| 9.868054  | 7.237874  | 5.194891 | 0 | 0 | 0 |
| 11.101065 | 9.379793  | 5.151558 | 0 | 0 | 0 |
| 11.063307 | 7.994108  | 8.808185 | 0 | 0 | 0 |
| 12.298149 | 10.129431 | 8.903401 | 0 | 0 | 0 |
| 9.869303  | 10.085933 | 5.156309 | 0 | 0 | 0 |
| 11.100208 | 7.941749  | 5.168618 | 0 | 0 | 0 |
| 11.062057 | 9.430623  | 8.888392 | 0 | 0 | 0 |
| 12.302548 | 11.565567 | 8.946939 | 0 | 0 | 0 |
| 12.331694 | 7.237995  | 5.194469 | 0 | 0 | 0 |
| 13.564367 | 9.380209  | 5.144347 | 0 | 0 | 0 |
| 13.527537 | 7.985546  | 8.801711 | 0 | 0 | 0 |
| 14.762327 | 10.123195 | 8.882854 | 0 | 0 | 0 |
| 12.332567 | 10.086366 | 5.155112 | 0 | 0 | 0 |
| 13.563503 | 7.942142  | 5.164851 | 0 | 0 | 0 |
| 13.527308 | 9.420405  | 8.869248 | 0 | 0 | 0 |

|           |           |          |   |   |   |
|-----------|-----------|----------|---|---|---|
| 14.764303 | 11.557270 | 8.906463 | 0 | 0 | 0 |
| 0.016106  | 11.525163 | 5.166210 | 0 | 0 | 0 |
| 1.247700  | 13.675348 | 5.222087 | 0 | 0 | 0 |
| 1.212166  | 12.263355 | 8.894092 | 0 | 0 | 0 |
| 2.439982  | 14.387277 | 8.867485 | 0 | 0 | 0 |
| 0.016989  | 14.354079 | 5.272951 | 0 | 0 | 0 |
| 1.247937  | 12.229631 | 5.172747 | 0 | 0 | 0 |
| 1.214345  | 13.708176 | 8.887715 | 0 | 0 | 0 |
| 2.479583  | 11.525801 | 5.145468 | 0 | 0 | 0 |
| 3.712181  | 13.676356 | 5.195353 | 0 | 0 | 0 |
| 3.669320  | 12.262483 | 8.881842 | 0 | 0 | 0 |
| 4.893701  | 14.385890 | 8.860749 | 0 | 0 | 0 |
| 2.480004  | 14.355964 | 5.231485 | 0 | 0 | 0 |
| 3.711497  | 12.230218 | 5.156022 | 0 | 0 | 0 |
| 3.662122  | 13.703663 | 8.871173 | 0 | 0 | 0 |
| 4.942897  | 11.525420 | 5.143507 | 0 | 0 | 0 |
| 6.176274  | 13.675051 | 5.200324 | 0 | 0 | 0 |
| 6.131455  | 12.279109 | 8.905909 | 0 | 0 | 0 |
| 7.366144  | 14.429670 | 8.882028 | 0 | 0 | 0 |
| 4.943471  | 14.356269 | 5.213748 | 0 | 0 | 0 |
| 6.174933  | 12.229172 | 5.166227 | 0 | 0 | 0 |
| 6.118786  | 13.723364 | 8.877654 | 0 | 0 | 0 |

|           |           |          |          |          |          |
|-----------|-----------|----------|----------|----------|----------|
| 7.406253  | 11.524130 | 5.163677 | 0        | 0        | 0        |
| 8.638758  | 13.673235 | 5.243767 | 0        | 0        | 0        |
| 8.589395  | 12.290668 | 9.002075 | 0        | 0        | 0        |
| 9.838554  | 14.390477 | 9.303050 | 0        | 0        | 0        |
| 7.406718  | 14.353861 | 5.235297 | 0        | 0        | 0        |
| 8.638200  | 12.227779 | 5.198004 | 0        | 0        | 0        |
| 8.555707  | 13.735963 | 9.045978 | 0        | 0        | 0        |
| 9.869847  | 11.523381 | 5.188925 | 0        | 0        | 0        |
| 11.100990 | 13.673517 | 5.276688 | 0        | 0        | 0        |
| 11.073784 | 12.273332 | 9.008906 | 0        | 0        | 0        |
| 12.306938 | 14.388964 | 9.003328 | 0        | 0        | 0        |
| 9.869336  | 14.352999 | 5.295636 | 0        | 0        | 0        |
| 11.101606 | 12.228036 | 5.216496 | 0        | 0        | 0        |
| 11.114641 | 13.706356 | 9.078765 | 0        | 0        | 0        |
| 12.333258 | 11.524106 | 5.188149 | 0        | 0        | 0        |
| 13.564299 | 13.673994 | 5.259947 | 0        | 0        | 0        |
| 13.536260 | 12.266008 | 8.935868 | 0        | 0        | 0        |
| 14.762665 | 14.389058 | 8.904260 | 0        | 0        | 0        |
| 12.333972 | 14.352875 | 5.307100 | 0        | 0        | 0        |
| 13.565052 | 12.228698 | 5.201052 | 0        | 0        | 0        |
| 13.549212 | 13.706896 | 8.943993 | 0        | 0        | 0        |
| 9.911257  | 15.531849 | 9.994722 | 0.072317 | 0.696480 | 0.455417 |

7.288643 16.408837 8.698126 0 0 0  
10.025257 16.503653 10.644976 -0.053949 -0.454239 -0.305020

2 f = 19.764670 THz 124.185082 2PiTHz 659.278395 cm-1 81.740133 meV

|  | X         | Y         | Z        | dx | dy | dz |
|--|-----------|-----------|----------|----|----|----|
|  | 1.245750  | 4.028696  | 5.439790 | 0  | 0  | 0  |
|  | 1.210240  | 4.075813  | 8.437264 | 0  | 0  | 0  |
|  | 3.708620  | 4.028896  | 5.439647 | 0  | 0  | 0  |
|  | 3.679981  | 4.077333  | 8.436900 | 0  | 0  | 0  |
|  | 6.171574  | 4.028537  | 5.439423 | 0  | 0  | 0  |
|  | 6.144822  | 4.082922  | 8.432952 | 0  | 0  | 0  |
|  | 8.635129  | 4.028007  | 5.438685 | 0  | 0  | 0  |
|  | 8.603386  | 4.087320  | 8.430892 | 0  | 0  | 0  |
|  | 11.099276 | 4.027838  | 5.438849 | 0  | 0  | 0  |
|  | 11.060208 | 4.086191  | 8.430988 | 0  | 0  | 0  |
|  | 13.563114 | 4.028068  | 5.439721 | 0  | 0  | 0  |
|  | 13.521407 | 4.080469  | 8.433485 | 0  | 0  | 0  |
|  | 2.442410  | 15.480732 | 8.852243 | 0  | 0  | 0  |
|  | 0.017143  | 15.446242 | 5.324686 | 0  | 0  | 0  |
|  | 4.860405  | 15.477285 | 8.866232 | 0  | 0  | 0  |
|  | 2.480161  | 15.448544 | 5.275619 | 0  | 0  | 0  |
|  | 4.943820  | 15.449251 | 5.248689 | 0  | 0  | 0  |

|           |           |          |   |   |   |
|-----------|-----------|----------|---|---|---|
| 12.315308 | 15.482418 | 9.002109 | 0 | 0 | 0 |
| 9.867716  | 15.445563 | 5.341755 | 0 | 0 | 0 |
| 14.762794 | 15.482453 | 8.899515 | 0 | 0 | 0 |
| 12.333845 | 15.445098 | 5.361284 | 0 | 0 | 0 |
| 7.407428  | 15.446161 | 5.264635 | 0 | 0 | 0 |
| 6.448461  | 16.344273 | 7.406481 | 0 | 0 | 0 |
| 8.600641  | 16.476444 | 7.892492 | 0 | 0 | 0 |
| 1.245442  | 5.118809  | 5.355005 | 0 | 0 | 0 |
| 2.443484  | 5.838886  | 8.622924 | 0 | 0 | 0 |
| 0.013795  | 5.795296  | 5.285730 | 0 | 0 | 0 |
| 1.210631  | 5.164204  | 8.541507 | 0 | 0 | 0 |
| 2.443506  | 7.279307  | 8.748318 | 0 | 0 | 0 |
| 3.708657  | 5.118963  | 5.353897 | 0 | 0 | 0 |
| 4.907998  | 5.843148  | 8.621230 | 0 | 0 | 0 |
| 2.477011  | 5.795606  | 5.283967 | 0 | 0 | 0 |
| 3.676791  | 5.165724  | 8.540005 | 0 | 0 | 0 |
| 4.907637  | 7.283976  | 8.747768 | 0 | 0 | 0 |
| 6.171844  | 5.118599  | 5.354330 | 0 | 0 | 0 |
| 7.370958  | 5.849291  | 8.620941 | 0 | 0 | 0 |
| 4.940290  | 5.795478  | 5.283402 | 0 | 0 | 0 |
| 6.140801  | 5.171085  | 8.537152 | 0 | 0 | 0 |
| 7.370710  | 7.289828  | 8.751319 | 0 | 0 | 0 |

|           |           |          |   |   |   |
|-----------|-----------|----------|---|---|---|
| 8.635429  | 5.118198  | 5.355206 | 0 | 0 | 0 |
| 9.832333  | 5.851658  | 8.623372 | 0 | 0 | 0 |
| 7.403740  | 5.794978  | 5.285116 | 0 | 0 | 0 |
| 8.601944  | 5.175280  | 8.537586 | 0 | 0 | 0 |
| 9.832040  | 7.291102  | 8.757194 | 0 | 0 | 0 |
| 11.099301 | 5.118139  | 5.355778 | 0 | 0 | 0 |
| 12.294487 | 5.846734  | 8.623846 | 0 | 0 | 0 |
| 9.867501  | 5.794678  | 5.286784 | 0 | 0 | 0 |
| 11.062615 | 5.174090  | 8.538935 | 0 | 0 | 0 |
| 12.294275 | 7.287294  | 8.755327 | 0 | 0 | 0 |
| 13.562782 | 5.118287  | 5.356054 | 0 | 0 | 0 |
| 14.758955 | 5.839879  | 8.624340 | 0 | 0 | 0 |
| 12.331181 | 5.794804  | 5.286924 | 0 | 0 | 0 |
| 13.525352 | 5.168439  | 8.540216 | 0 | 0 | 0 |
| 14.759167 | 7.280119  | 8.751789 | 0 | 0 | 0 |
| 0.014336  | 7.238301  | 5.190167 | 0 | 0 | 0 |
| 1.246890  | 9.380615  | 5.131604 | 0 | 0 | 0 |
| 1.210852  | 7.980592  | 8.795883 | 0 | 0 | 0 |
| 2.442140  | 10.122434 | 8.871408 | 0 | 0 | 0 |
| 0.015317  | 10.086865 | 5.140485 | 0 | 0 | 0 |
| 1.246057  | 7.942443  | 5.157748 | 0 | 0 | 0 |
| 1.210824  | 9.415918  | 8.857817 | 0 | 0 | 0 |

|          |           |          |   |   |   |
|----------|-----------|----------|---|---|---|
| 2.440724 | 11.555126 | 8.884137 | 0 | 0 | 0 |
| 2.477470 | 7.238419  | 5.185851 | 0 | 0 | 0 |
| 3.709968 | 9.380553  | 5.125659 | 0 | 0 | 0 |
| 3.675342 | 7.983601  | 8.793493 | 0 | 0 | 0 |
| 4.904874 | 10.129253 | 8.875180 | 0 | 0 | 0 |
| 2.478671 | 10.087127 | 5.126952 | 0 | 0 | 0 |
| 3.709392 | 7.942417  | 5.154413 | 0 | 0 | 0 |
| 3.675893 | 9.419704  | 8.854452 | 0 | 0 | 0 |
| 4.902634 | 11.565058 | 8.890860 | 0 | 0 | 0 |
| 4.940845 | 7.238299  | 5.185525 | 0 | 0 | 0 |
| 6.173182 | 9.380022  | 5.131732 | 0 | 0 | 0 |
| 6.138637 | 7.990443  | 8.796473 | 0 | 0 | 0 |
| 7.367803 | 10.137604 | 8.894732 | 0 | 0 | 0 |
| 4.941960 | 10.086817 | 5.126998 | 0 | 0 | 0 |
| 6.172836 | 7.941986  | 5.157656 | 0 | 0 | 0 |
| 6.139386 | 9.426599  | 8.861638 | 0 | 0 | 0 |
| 7.364099 | 11.577214 | 8.929347 | 0 | 0 | 0 |
| 7.404261 | 7.237943  | 5.190115 | 0 | 0 | 0 |
| 8.637001 | 9.379701  | 5.145427 | 0 | 0 | 0 |
| 8.600855 | 7.995677  | 8.806165 | 0 | 0 | 0 |
| 9.830681 | 10.142862 | 8.928417 | 0 | 0 | 0 |
| 7.405532 | 10.086269 | 5.140638 | 0 | 0 | 0 |

|           |           |          |   |   |   |
|-----------|-----------|----------|---|---|---|
| 8.636371  | 7.941660  | 5.165549 | 0 | 0 | 0 |
| 8.600773  | 9.432544  | 8.885323 | 0 | 0 | 0 |
| 9.829269  | 11.582438 | 9.000960 | 0 | 0 | 0 |
| 9.868054  | 7.237874  | 5.194891 | 0 | 0 | 0 |
| 11.101065 | 9.379793  | 5.151558 | 0 | 0 | 0 |
| 11.063307 | 7.994108  | 8.808185 | 0 | 0 | 0 |
| 12.298149 | 10.129431 | 8.903401 | 0 | 0 | 0 |
| 9.869303  | 10.085933 | 5.156309 | 0 | 0 | 0 |
| 11.100208 | 7.941749  | 5.168618 | 0 | 0 | 0 |
| 11.062057 | 9.430623  | 8.888392 | 0 | 0 | 0 |
| 12.302548 | 11.565567 | 8.946939 | 0 | 0 | 0 |
| 12.331694 | 7.237995  | 5.194469 | 0 | 0 | 0 |
| 13.564367 | 9.380209  | 5.144347 | 0 | 0 | 0 |
| 13.527537 | 7.985546  | 8.801711 | 0 | 0 | 0 |
| 14.762327 | 10.123195 | 8.882854 | 0 | 0 | 0 |
| 12.332567 | 10.086366 | 5.155112 | 0 | 0 | 0 |
| 13.563503 | 7.942142  | 5.164851 | 0 | 0 | 0 |
| 13.527308 | 9.420405  | 8.869248 | 0 | 0 | 0 |
| 14.764303 | 11.557270 | 8.906463 | 0 | 0 | 0 |
| 0.016106  | 11.525163 | 5.166210 | 0 | 0 | 0 |
| 1.247700  | 13.675348 | 5.222087 | 0 | 0 | 0 |
| 1.212166  | 12.263355 | 8.894092 | 0 | 0 | 0 |

|          |           |          |   |   |   |
|----------|-----------|----------|---|---|---|
| 2.439982 | 14.387277 | 8.867485 | 0 | 0 | 0 |
| 0.016989 | 14.354079 | 5.272951 | 0 | 0 | 0 |
| 1.247937 | 12.229631 | 5.172747 | 0 | 0 | 0 |
| 1.214345 | 13.708176 | 8.887715 | 0 | 0 | 0 |
| 2.479583 | 11.525801 | 5.145468 | 0 | 0 | 0 |
| 3.712181 | 13.676356 | 5.195353 | 0 | 0 | 0 |
| 3.669320 | 12.262483 | 8.881842 | 0 | 0 | 0 |
| 4.893701 | 14.385890 | 8.860749 | 0 | 0 | 0 |
| 2.480004 | 14.355964 | 5.231485 | 0 | 0 | 0 |
| 3.711497 | 12.230218 | 5.156022 | 0 | 0 | 0 |
| 3.662122 | 13.703663 | 8.871173 | 0 | 0 | 0 |
| 4.942897 | 11.525420 | 5.143507 | 0 | 0 | 0 |
| 6.176274 | 13.675051 | 5.200324 | 0 | 0 | 0 |
| 6.131455 | 12.279109 | 8.905909 | 0 | 0 | 0 |
| 7.366144 | 14.429670 | 8.882028 | 0 | 0 | 0 |
| 4.943471 | 14.356269 | 5.213748 | 0 | 0 | 0 |
| 6.174933 | 12.229172 | 5.166227 | 0 | 0 | 0 |
| 6.118786 | 13.723364 | 8.877654 | 0 | 0 | 0 |
| 7.406253 | 11.524130 | 5.163677 | 0 | 0 | 0 |
| 8.638758 | 13.673235 | 5.243767 | 0 | 0 | 0 |
| 8.589395 | 12.290668 | 9.002075 | 0 | 0 | 0 |
| 9.838554 | 14.390477 | 9.303050 | 0 | 0 | 0 |

|           |           |           |           |          |          |
|-----------|-----------|-----------|-----------|----------|----------|
| 7.406718  | 14.353861 | 5.235297  | 0         | 0        | 0        |
| 8.638200  | 12.227779 | 5.198004  | 0         | 0        | 0        |
| 8.555707  | 13.735963 | 9.045978  | 0         | 0        | 0        |
| 9.869847  | 11.523381 | 5.188925  | 0         | 0        | 0        |
| 11.100990 | 13.673517 | 5.276688  | 0         | 0        | 0        |
| 11.073784 | 12.273332 | 9.008906  | 0         | 0        | 0        |
| 12.306938 | 14.388964 | 9.003328  | 0         | 0        | 0        |
| 9.869336  | 14.352999 | 5.295636  | 0         | 0        | 0        |
| 11.101606 | 12.228036 | 5.216496  | 0         | 0        | 0        |
| 11.114641 | 13.706356 | 9.078765  | 0         | 0        | 0        |
| 12.333258 | 11.524106 | 5.188149  | 0         | 0        | 0        |
| 13.564299 | 13.673994 | 5.259947  | 0         | 0        | 0        |
| 13.536260 | 12.266008 | 8.935868  | 0         | 0        | 0        |
| 14.762665 | 14.389058 | 8.904260  | 0         | 0        | 0        |
| 12.333972 | 14.352875 | 5.307100  | 0         | 0        | 0        |
| 13.565052 | 12.228698 | 5.201052  | 0         | 0        | 0        |
| 13.549212 | 13.706896 | 8.943993  | 0         | 0        | 0        |
| 9.911257  | 15.531849 | 9.994722  | -0.109154 | 0.508971 | 0.230654 |
| 7.288643  | 16.408837 | 8.698126  | 0         | 0        | 0        |
| 10.025257 | 16.503653 | 10.644976 | 0.110052  | 0.669101 | 0.464786 |

3 f = 17.229065 THz 108.253405 2PiTHz 574.699715 cm-1 71.253709 meV

|  | X         | Y         | Z        | dx | dy | dz |
|--|-----------|-----------|----------|----|----|----|
|  | 1.245750  | 4.028696  | 5.439790 | 0  | 0  | 0  |
|  | 1.210240  | 4.075813  | 8.437264 | 0  | 0  | 0  |
|  | 3.708620  | 4.028896  | 5.439647 | 0  | 0  | 0  |
|  | 3.679981  | 4.077333  | 8.436900 | 0  | 0  | 0  |
|  | 6.171574  | 4.028537  | 5.439423 | 0  | 0  | 0  |
|  | 6.144822  | 4.082922  | 8.432952 | 0  | 0  | 0  |
|  | 8.635129  | 4.028007  | 5.438685 | 0  | 0  | 0  |
|  | 8.603386  | 4.087320  | 8.430892 | 0  | 0  | 0  |
|  | 11.099276 | 4.027838  | 5.438849 | 0  | 0  | 0  |
|  | 11.060208 | 4.086191  | 8.430988 | 0  | 0  | 0  |
|  | 13.563114 | 4.028068  | 5.439721 | 0  | 0  | 0  |
|  | 13.521407 | 4.080469  | 8.433485 | 0  | 0  | 0  |
|  | 2.442410  | 15.480732 | 8.852243 | 0  | 0  | 0  |
|  | 0.017143  | 15.446242 | 5.324686 | 0  | 0  | 0  |
|  | 4.860405  | 15.477285 | 8.866232 | 0  | 0  | 0  |
|  | 2.480161  | 15.448544 | 5.275619 | 0  | 0  | 0  |
|  | 4.943820  | 15.449251 | 5.248689 | 0  | 0  | 0  |
|  | 12.315308 | 15.482418 | 9.002109 | 0  | 0  | 0  |
|  | 9.867716  | 15.445563 | 5.341755 | 0  | 0  | 0  |
|  | 14.762794 | 15.482453 | 8.899515 | 0  | 0  | 0  |
|  | 12.333845 | 15.445098 | 5.361284 | 0  | 0  | 0  |

|          |           |          |   |   |   |
|----------|-----------|----------|---|---|---|
| 7.407428 | 15.446161 | 5.264635 | 0 | 0 | 0 |
| 6.448461 | 16.344273 | 7.406481 | 0 | 0 | 0 |
| 8.600641 | 16.476444 | 7.892492 | 0 | 0 | 0 |
| 1.245442 | 5.118809  | 5.355005 | 0 | 0 | 0 |
| 2.443484 | 5.838886  | 8.622924 | 0 | 0 | 0 |
| 0.013795 | 5.795296  | 5.285730 | 0 | 0 | 0 |
| 1.210631 | 5.164204  | 8.541507 | 0 | 0 | 0 |
| 2.443506 | 7.279307  | 8.748318 | 0 | 0 | 0 |
| 3.708657 | 5.118963  | 5.353897 | 0 | 0 | 0 |
| 4.907998 | 5.843148  | 8.621230 | 0 | 0 | 0 |
| 2.477011 | 5.795606  | 5.283967 | 0 | 0 | 0 |
| 3.676791 | 5.165724  | 8.540005 | 0 | 0 | 0 |
| 4.907637 | 7.283976  | 8.747768 | 0 | 0 | 0 |
| 6.171844 | 5.118599  | 5.354330 | 0 | 0 | 0 |
| 7.370958 | 5.849291  | 8.620941 | 0 | 0 | 0 |
| 4.940290 | 5.795478  | 5.283402 | 0 | 0 | 0 |
| 6.140801 | 5.171085  | 8.537152 | 0 | 0 | 0 |
| 7.370710 | 7.289828  | 8.751319 | 0 | 0 | 0 |
| 8.635429 | 5.118198  | 5.355206 | 0 | 0 | 0 |
| 9.832333 | 5.851658  | 8.623372 | 0 | 0 | 0 |
| 7.403740 | 5.794978  | 5.285116 | 0 | 0 | 0 |
| 8.601944 | 5.175280  | 8.537586 | 0 | 0 | 0 |

|           |           |          |   |   |   |
|-----------|-----------|----------|---|---|---|
| 9.832040  | 7.291102  | 8.757194 | 0 | 0 | 0 |
| 11.099301 | 5.118139  | 5.355778 | 0 | 0 | 0 |
| 12.294487 | 5.846734  | 8.623846 | 0 | 0 | 0 |
| 9.867501  | 5.794678  | 5.286784 | 0 | 0 | 0 |
| 11.062615 | 5.174090  | 8.538935 | 0 | 0 | 0 |
| 12.294275 | 7.287294  | 8.755327 | 0 | 0 | 0 |
| 13.562782 | 5.118287  | 5.356054 | 0 | 0 | 0 |
| 14.758955 | 5.839879  | 8.624340 | 0 | 0 | 0 |
| 12.331181 | 5.794804  | 5.286924 | 0 | 0 | 0 |
| 13.525352 | 5.168439  | 8.540216 | 0 | 0 | 0 |
| 14.759167 | 7.280119  | 8.751789 | 0 | 0 | 0 |
| 0.014336  | 7.238301  | 5.190167 | 0 | 0 | 0 |
| 1.246890  | 9.380615  | 5.131604 | 0 | 0 | 0 |
| 1.210852  | 7.980592  | 8.795883 | 0 | 0 | 0 |
| 2.442140  | 10.122434 | 8.871408 | 0 | 0 | 0 |
| 0.015317  | 10.086865 | 5.140485 | 0 | 0 | 0 |
| 1.246057  | 7.942443  | 5.157748 | 0 | 0 | 0 |
| 1.210824  | 9.415918  | 8.857817 | 0 | 0 | 0 |
| 2.440724  | 11.555126 | 8.884137 | 0 | 0 | 0 |
| 2.477470  | 7.238419  | 5.185851 | 0 | 0 | 0 |
| 3.709968  | 9.380553  | 5.125659 | 0 | 0 | 0 |
| 3.675342  | 7.983601  | 8.793493 | 0 | 0 | 0 |

|          |           |          |   |   |   |
|----------|-----------|----------|---|---|---|
| 4.904874 | 10.129253 | 8.875180 | 0 | 0 | 0 |
| 2.478671 | 10.087127 | 5.126952 | 0 | 0 | 0 |
| 3.709392 | 7.942417  | 5.154413 | 0 | 0 | 0 |
| 3.675893 | 9.419704  | 8.854452 | 0 | 0 | 0 |
| 4.902634 | 11.565058 | 8.890860 | 0 | 0 | 0 |
| 4.940845 | 7.238299  | 5.185525 | 0 | 0 | 0 |
| 6.173182 | 9.380022  | 5.131732 | 0 | 0 | 0 |
| 6.138637 | 7.990443  | 8.796473 | 0 | 0 | 0 |
| 7.367803 | 10.137604 | 8.894732 | 0 | 0 | 0 |
| 4.941960 | 10.086817 | 5.126998 | 0 | 0 | 0 |
| 6.172836 | 7.941986  | 5.157656 | 0 | 0 | 0 |
| 6.139386 | 9.426599  | 8.861638 | 0 | 0 | 0 |
| 7.364099 | 11.577214 | 8.929347 | 0 | 0 | 0 |
| 7.404261 | 7.237943  | 5.190115 | 0 | 0 | 0 |
| 8.637001 | 9.379701  | 5.145427 | 0 | 0 | 0 |
| 8.600855 | 7.995677  | 8.806165 | 0 | 0 | 0 |
| 9.830681 | 10.142862 | 8.928417 | 0 | 0 | 0 |
| 7.405532 | 10.086269 | 5.140638 | 0 | 0 | 0 |
| 8.636371 | 7.941660  | 5.165549 | 0 | 0 | 0 |
| 8.600773 | 9.432544  | 8.885323 | 0 | 0 | 0 |
| 9.829269 | 11.582438 | 9.000960 | 0 | 0 | 0 |
| 9.868054 | 7.237874  | 5.194891 | 0 | 0 | 0 |

|           |           |          |   |   |   |
|-----------|-----------|----------|---|---|---|
| 11.101065 | 9.379793  | 5.151558 | 0 | 0 | 0 |
| 11.063307 | 7.994108  | 8.808185 | 0 | 0 | 0 |
| 12.298149 | 10.129431 | 8.903401 | 0 | 0 | 0 |
| 9.869303  | 10.085933 | 5.156309 | 0 | 0 | 0 |
| 11.100208 | 7.941749  | 5.168618 | 0 | 0 | 0 |
| 11.062057 | 9.430623  | 8.888392 | 0 | 0 | 0 |
| 12.302548 | 11.565567 | 8.946939 | 0 | 0 | 0 |
| 12.331694 | 7.237995  | 5.194469 | 0 | 0 | 0 |
| 13.564367 | 9.380209  | 5.144347 | 0 | 0 | 0 |
| 13.527537 | 7.985546  | 8.801711 | 0 | 0 | 0 |
| 14.762327 | 10.123195 | 8.882854 | 0 | 0 | 0 |
| 12.332567 | 10.086366 | 5.155112 | 0 | 0 | 0 |
| 13.563503 | 7.942142  | 5.164851 | 0 | 0 | 0 |
| 13.527308 | 9.420405  | 8.869248 | 0 | 0 | 0 |
| 14.764303 | 11.557270 | 8.906463 | 0 | 0 | 0 |
| 0.016106  | 11.525163 | 5.166210 | 0 | 0 | 0 |
| 1.247700  | 13.675348 | 5.222087 | 0 | 0 | 0 |
| 1.212166  | 12.263355 | 8.894092 | 0 | 0 | 0 |
| 2.439982  | 14.387277 | 8.867485 | 0 | 0 | 0 |
| 0.016989  | 14.354079 | 5.272951 | 0 | 0 | 0 |
| 1.247937  | 12.229631 | 5.172747 | 0 | 0 | 0 |
| 1.214345  | 13.708176 | 8.887715 | 0 | 0 | 0 |

|          |           |          |   |   |   |
|----------|-----------|----------|---|---|---|
| 2.479583 | 11.525801 | 5.145468 | 0 | 0 | 0 |
| 3.712181 | 13.676356 | 5.195353 | 0 | 0 | 0 |
| 3.669320 | 12.262483 | 8.881842 | 0 | 0 | 0 |
| 4.893701 | 14.385890 | 8.860749 | 0 | 0 | 0 |
| 2.480004 | 14.355964 | 5.231485 | 0 | 0 | 0 |
| 3.711497 | 12.230218 | 5.156022 | 0 | 0 | 0 |
| 3.662122 | 13.703663 | 8.871173 | 0 | 0 | 0 |
| 4.942897 | 11.525420 | 5.143507 | 0 | 0 | 0 |
| 6.176274 | 13.675051 | 5.200324 | 0 | 0 | 0 |
| 6.131455 | 12.279109 | 8.905909 | 0 | 0 | 0 |
| 7.366144 | 14.429670 | 8.882028 | 0 | 0 | 0 |
| 4.943471 | 14.356269 | 5.213748 | 0 | 0 | 0 |
| 6.174933 | 12.229172 | 5.166227 | 0 | 0 | 0 |
| 6.118786 | 13.723364 | 8.877654 | 0 | 0 | 0 |
| 7.406253 | 11.524130 | 5.163677 | 0 | 0 | 0 |
| 8.638758 | 13.673235 | 5.243767 | 0 | 0 | 0 |
| 8.589395 | 12.290668 | 9.002075 | 0 | 0 | 0 |
| 9.838554 | 14.390477 | 9.303050 | 0 | 0 | 0 |
| 7.406718 | 14.353861 | 5.235297 | 0 | 0 | 0 |
| 8.638200 | 12.227779 | 5.198004 | 0 | 0 | 0 |
| 8.555707 | 13.735963 | 9.045978 | 0 | 0 | 0 |
| 9.869847 | 11.523381 | 5.188925 | 0 | 0 | 0 |

|           |           |           |           |           |           |
|-----------|-----------|-----------|-----------|-----------|-----------|
| 11.100990 | 13.673517 | 5.276688  | 0         | 0         | 0         |
| 11.073784 | 12.273332 | 9.008906  | 0         | 0         | 0         |
| 12.306938 | 14.388964 | 9.003328  | 0         | 0         | 0         |
| 9.869336  | 14.352999 | 5.295636  | 0         | 0         | 0         |
| 11.101606 | 12.228036 | 5.216496  | 0         | 0         | 0         |
| 11.114641 | 13.706356 | 9.078765  | 0         | 0         | 0         |
| 12.333258 | 11.524106 | 5.188149  | 0         | 0         | 0         |
| 13.564299 | 13.673994 | 5.259947  | 0         | 0         | 0         |
| 13.536260 | 12.266008 | 8.935868  | 0         | 0         | 0         |
| 14.762665 | 14.389058 | 8.904260  | 0         | 0         | 0         |
| 12.333972 | 14.352875 | 5.307100  | 0         | 0         | 0         |
| 13.565052 | 12.228698 | 5.201052  | 0         | 0         | 0         |
| 13.549212 | 13.706896 | 8.943993  | 0         | 0         | 0         |
| 9.911257  | 15.531849 | 9.994722  | -0.946664 | -0.014731 | 0.014422  |
| 7.288643  | 16.408837 | 8.698126  | 0         | 0         | 0         |
| 10.025257 | 16.503653 | 10.644976 | 0.279249  | -0.130396 | -0.091751 |

$$4 f = 12.865144 \text{ THz} \quad 80.834085 \text{ 2PiTHz} \quad 429.135008 \text{ cm-1} \quad 53.205979 \text{ meV}$$

|          | X        | Y        | Z | dx | dy | dz |
|----------|----------|----------|---|----|----|----|
| 1.245750 | 4.028696 | 5.439790 |   | 0  | 0  | 0  |
| 1.210240 | 4.075813 | 8.437264 |   | 0  | 0  | 0  |
| 3.708620 | 4.028896 | 5.439647 |   | 0  | 0  | 0  |

|           |           |          |   |   |   |
|-----------|-----------|----------|---|---|---|
| 3.679981  | 4.077333  | 8.436900 | 0 | 0 | 0 |
| 6.171574  | 4.028537  | 5.439423 | 0 | 0 | 0 |
| 6.144822  | 4.082922  | 8.432952 | 0 | 0 | 0 |
| 8.635129  | 4.028007  | 5.438685 | 0 | 0 | 0 |
| 8.603386  | 4.087320  | 8.430892 | 0 | 0 | 0 |
| 11.099276 | 4.027838  | 5.438849 | 0 | 0 | 0 |
| 11.060208 | 4.086191  | 8.430988 | 0 | 0 | 0 |
| 13.563114 | 4.028068  | 5.439721 | 0 | 0 | 0 |
| 13.521407 | 4.080469  | 8.433485 | 0 | 0 | 0 |
| 2.442410  | 15.480732 | 8.852243 | 0 | 0 | 0 |
| 0.017143  | 15.446242 | 5.324686 | 0 | 0 | 0 |
| 4.860405  | 15.477285 | 8.866232 | 0 | 0 | 0 |
| 2.480161  | 15.448544 | 5.275619 | 0 | 0 | 0 |
| 4.943820  | 15.449251 | 5.248689 | 0 | 0 | 0 |
| 12.315308 | 15.482418 | 9.002109 | 0 | 0 | 0 |
| 9.867716  | 15.445563 | 5.341755 | 0 | 0 | 0 |
| 14.762794 | 15.482453 | 8.899515 | 0 | 0 | 0 |
| 12.333845 | 15.445098 | 5.361284 | 0 | 0 | 0 |
| 7.407428  | 15.446161 | 5.264635 | 0 | 0 | 0 |
| 6.448461  | 16.344273 | 7.406481 | 0 | 0 | 0 |
| 8.600641  | 16.476444 | 7.892492 | 0 | 0 | 0 |
| 1.245442  | 5.118809  | 5.355005 | 0 | 0 | 0 |

|           |          |          |   |   |   |
|-----------|----------|----------|---|---|---|
| 2.443484  | 5.838886 | 8.622924 | 0 | 0 | 0 |
| 0.013795  | 5.795296 | 5.285730 | 0 | 0 | 0 |
| 1.210631  | 5.164204 | 8.541507 | 0 | 0 | 0 |
| 2.443506  | 7.279307 | 8.748318 | 0 | 0 | 0 |
| 3.708657  | 5.118963 | 5.353897 | 0 | 0 | 0 |
| 4.907998  | 5.843148 | 8.621230 | 0 | 0 | 0 |
| 2.477011  | 5.795606 | 5.283967 | 0 | 0 | 0 |
| 3.676791  | 5.165724 | 8.540005 | 0 | 0 | 0 |
| 4.907637  | 7.283976 | 8.747768 | 0 | 0 | 0 |
| 6.171844  | 5.118599 | 5.354330 | 0 | 0 | 0 |
| 7.370958  | 5.849291 | 8.620941 | 0 | 0 | 0 |
| 4.940290  | 5.795478 | 5.283402 | 0 | 0 | 0 |
| 6.140801  | 5.171085 | 8.537152 | 0 | 0 | 0 |
| 7.370710  | 7.289828 | 8.751319 | 0 | 0 | 0 |
| 8.635429  | 5.118198 | 5.355206 | 0 | 0 | 0 |
| 9.832333  | 5.851658 | 8.623372 | 0 | 0 | 0 |
| 7.403740  | 5.794978 | 5.285116 | 0 | 0 | 0 |
| 8.601944  | 5.175280 | 8.537586 | 0 | 0 | 0 |
| 9.832040  | 7.291102 | 8.757194 | 0 | 0 | 0 |
| 11.099301 | 5.118139 | 5.355778 | 0 | 0 | 0 |
| 12.294487 | 5.846734 | 8.623846 | 0 | 0 | 0 |
| 9.867501  | 5.794678 | 5.286784 | 0 | 0 | 0 |

|           |           |          |   |   |   |
|-----------|-----------|----------|---|---|---|
| 11.062615 | 5.174090  | 8.538935 | 0 | 0 | 0 |
| 12.294275 | 7.287294  | 8.755327 | 0 | 0 | 0 |
| 13.562782 | 5.118287  | 5.356054 | 0 | 0 | 0 |
| 14.758955 | 5.839879  | 8.624340 | 0 | 0 | 0 |
| 12.331181 | 5.794804  | 5.286924 | 0 | 0 | 0 |
| 13.525352 | 5.168439  | 8.540216 | 0 | 0 | 0 |
| 14.759167 | 7.280119  | 8.751789 | 0 | 0 | 0 |
| 0.014336  | 7.238301  | 5.190167 | 0 | 0 | 0 |
| 1.246890  | 9.380615  | 5.131604 | 0 | 0 | 0 |
| 1.210852  | 7.980592  | 8.795883 | 0 | 0 | 0 |
| 2.442140  | 10.122434 | 8.871408 | 0 | 0 | 0 |
| 0.015317  | 10.086865 | 5.140485 | 0 | 0 | 0 |
| 1.246057  | 7.942443  | 5.157748 | 0 | 0 | 0 |
| 1.210824  | 9.415918  | 8.857817 | 0 | 0 | 0 |
| 2.440724  | 11.555126 | 8.884137 | 0 | 0 | 0 |
| 2.477470  | 7.238419  | 5.185851 | 0 | 0 | 0 |
| 3.709968  | 9.380553  | 5.125659 | 0 | 0 | 0 |
| 3.675342  | 7.983601  | 8.793493 | 0 | 0 | 0 |
| 4.904874  | 10.129253 | 8.875180 | 0 | 0 | 0 |
| 2.478671  | 10.087127 | 5.126952 | 0 | 0 | 0 |
| 3.709392  | 7.942417  | 5.154413 | 0 | 0 | 0 |
| 3.675893  | 9.419704  | 8.854452 | 0 | 0 | 0 |

|           |           |          |   |   |   |
|-----------|-----------|----------|---|---|---|
| 4.902634  | 11.565058 | 8.890860 | 0 | 0 | 0 |
| 4.940845  | 7.238299  | 5.185525 | 0 | 0 | 0 |
| 6.173182  | 9.380022  | 5.131732 | 0 | 0 | 0 |
| 6.138637  | 7.990443  | 8.796473 | 0 | 0 | 0 |
| 7.367803  | 10.137604 | 8.894732 | 0 | 0 | 0 |
| 4.941960  | 10.086817 | 5.126998 | 0 | 0 | 0 |
| 6.172836  | 7.941986  | 5.157656 | 0 | 0 | 0 |
| 6.139386  | 9.426599  | 8.861638 | 0 | 0 | 0 |
| 7.364099  | 11.577214 | 8.929347 | 0 | 0 | 0 |
| 7.404261  | 7.237943  | 5.190115 | 0 | 0 | 0 |
| 8.637001  | 9.379701  | 5.145427 | 0 | 0 | 0 |
| 8.600855  | 7.995677  | 8.806165 | 0 | 0 | 0 |
| 9.830681  | 10.142862 | 8.928417 | 0 | 0 | 0 |
| 7.405532  | 10.086269 | 5.140638 | 0 | 0 | 0 |
| 8.636371  | 7.941660  | 5.165549 | 0 | 0 | 0 |
| 8.600773  | 9.432544  | 8.885323 | 0 | 0 | 0 |
| 9.829269  | 11.582438 | 9.000960 | 0 | 0 | 0 |
| 9.868054  | 7.237874  | 5.194891 | 0 | 0 | 0 |
| 11.101065 | 9.379793  | 5.151558 | 0 | 0 | 0 |
| 11.063307 | 7.994108  | 8.808185 | 0 | 0 | 0 |
| 12.298149 | 10.129431 | 8.903401 | 0 | 0 | 0 |
| 9.869303  | 10.085933 | 5.156309 | 0 | 0 | 0 |

|           |           |          |   |   |   |
|-----------|-----------|----------|---|---|---|
| 11.100208 | 7.941749  | 5.168618 | 0 | 0 | 0 |
| 11.062057 | 9.430623  | 8.888392 | 0 | 0 | 0 |
| 12.302548 | 11.565567 | 8.946939 | 0 | 0 | 0 |
| 12.331694 | 7.237995  | 5.194469 | 0 | 0 | 0 |
| 13.564367 | 9.380209  | 5.144347 | 0 | 0 | 0 |
| 13.527537 | 7.985546  | 8.801711 | 0 | 0 | 0 |
| 14.762327 | 10.123195 | 8.882854 | 0 | 0 | 0 |
| 12.332567 | 10.086366 | 5.155112 | 0 | 0 | 0 |
| 13.563503 | 7.942142  | 5.164851 | 0 | 0 | 0 |
| 13.527308 | 9.420405  | 8.869248 | 0 | 0 | 0 |
| 14.764303 | 11.557270 | 8.906463 | 0 | 0 | 0 |
| 0.016106  | 11.525163 | 5.166210 | 0 | 0 | 0 |
| 1.247700  | 13.675348 | 5.222087 | 0 | 0 | 0 |
| 1.212166  | 12.263355 | 8.894092 | 0 | 0 | 0 |
| 2.439982  | 14.387277 | 8.867485 | 0 | 0 | 0 |
| 0.016989  | 14.354079 | 5.272951 | 0 | 0 | 0 |
| 1.247937  | 12.229631 | 5.172747 | 0 | 0 | 0 |
| 1.214345  | 13.708176 | 8.887715 | 0 | 0 | 0 |
| 2.479583  | 11.525801 | 5.145468 | 0 | 0 | 0 |
| 3.712181  | 13.676356 | 5.195353 | 0 | 0 | 0 |
| 3.669320  | 12.262483 | 8.881842 | 0 | 0 | 0 |
| 4.893701  | 14.385890 | 8.860749 | 0 | 0 | 0 |

|           |           |          |   |   |   |
|-----------|-----------|----------|---|---|---|
| 2.480004  | 14.355964 | 5.231485 | 0 | 0 | 0 |
| 3.711497  | 12.230218 | 5.156022 | 0 | 0 | 0 |
| 3.662122  | 13.703663 | 8.871173 | 0 | 0 | 0 |
| 4.942897  | 11.525420 | 5.143507 | 0 | 0 | 0 |
| 6.176274  | 13.675051 | 5.200324 | 0 | 0 | 0 |
| 6.131455  | 12.279109 | 8.905909 | 0 | 0 | 0 |
| 7.366144  | 14.429670 | 8.882028 | 0 | 0 | 0 |
| 4.943471  | 14.356269 | 5.213748 | 0 | 0 | 0 |
| 6.174933  | 12.229172 | 5.166227 | 0 | 0 | 0 |
| 6.118786  | 13.723364 | 8.877654 | 0 | 0 | 0 |
| 7.406253  | 11.524130 | 5.163677 | 0 | 0 | 0 |
| 8.638758  | 13.673235 | 5.243767 | 0 | 0 | 0 |
| 8.589395  | 12.290668 | 9.002075 | 0 | 0 | 0 |
| 9.838554  | 14.390477 | 9.303050 | 0 | 0 | 0 |
| 7.406718  | 14.353861 | 5.235297 | 0 | 0 | 0 |
| 8.638200  | 12.227779 | 5.198004 | 0 | 0 | 0 |
| 8.555707  | 13.735963 | 9.045978 | 0 | 0 | 0 |
| 9.869847  | 11.523381 | 5.188925 | 0 | 0 | 0 |
| 11.100990 | 13.673517 | 5.276688 | 0 | 0 | 0 |
| 11.073784 | 12.273332 | 9.008906 | 0 | 0 | 0 |
| 12.306938 | 14.388964 | 9.003328 | 0 | 0 | 0 |
| 9.869336  | 14.352999 | 5.295636 | 0 | 0 | 0 |

|           |           |           |          |           |           |
|-----------|-----------|-----------|----------|-----------|-----------|
| 11.101606 | 12.228036 | 5.216496  | 0        | 0         | 0         |
| 11.114641 | 13.706356 | 9.078765  | 0        | 0         | 0         |
| 12.333258 | 11.524106 | 5.188149  | 0        | 0         | 0         |
| 13.564299 | 13.673994 | 5.259947  | 0        | 0         | 0         |
| 13.536260 | 12.266008 | 8.935868  | 0        | 0         | 0         |
| 14.762665 | 14.389058 | 8.904260  | 0        | 0         | 0         |
| 12.333972 | 14.352875 | 5.307100  | 0        | 0         | 0         |
| 13.565052 | 12.228698 | 5.201052  | 0        | 0         | 0         |
| 13.549212 | 13.706896 | 8.943993  | 0        | 0         | 0         |
| 9.911257  | 15.531849 | 9.994722  | 0.011699 | -0.455998 | 0.781392  |
| 7.288643  | 16.408837 | 8.698126  | 0        | 0         | 0         |
| 10.025257 | 16.503653 | 10.644976 | 0.010244 | 0.292567  | -0.309280 |

5 f = 3.487700 THz 21.913864 2PiTHz 116.337141 cm-1 14.423972 meV

|          | X        | Y        | Z | dx | dy | dz |
|----------|----------|----------|---|----|----|----|
| 1.245750 | 4.028696 | 5.439790 | 0 | 0  | 0  |    |
| 1.210240 | 4.075813 | 8.437264 | 0 | 0  | 0  |    |
| 3.708620 | 4.028896 | 5.439647 | 0 | 0  | 0  |    |
| 3.679981 | 4.077333 | 8.436900 | 0 | 0  | 0  |    |
| 6.171574 | 4.028537 | 5.439423 | 0 | 0  | 0  |    |
| 6.144822 | 4.082922 | 8.432952 | 0 | 0  | 0  |    |
| 8.635129 | 4.028007 | 5.438685 | 0 | 0  | 0  |    |

|           |           |          |   |   |   |
|-----------|-----------|----------|---|---|---|
| 8.603386  | 4.087320  | 8.430892 | 0 | 0 | 0 |
| 11.099276 | 4.027838  | 5.438849 | 0 | 0 | 0 |
| 11.060208 | 4.086191  | 8.430988 | 0 | 0 | 0 |
| 13.563114 | 4.028068  | 5.439721 | 0 | 0 | 0 |
| 13.521407 | 4.080469  | 8.433485 | 0 | 0 | 0 |
| 2.442410  | 15.480732 | 8.852243 | 0 | 0 | 0 |
| 0.017143  | 15.446242 | 5.324686 | 0 | 0 | 0 |
| 4.860405  | 15.477285 | 8.866232 | 0 | 0 | 0 |
| 2.480161  | 15.448544 | 5.275619 | 0 | 0 | 0 |
| 4.943820  | 15.449251 | 5.248689 | 0 | 0 | 0 |
| 12.315308 | 15.482418 | 9.002109 | 0 | 0 | 0 |
| 9.867716  | 15.445563 | 5.341755 | 0 | 0 | 0 |
| 14.762794 | 15.482453 | 8.899515 | 0 | 0 | 0 |
| 12.333845 | 15.445098 | 5.361284 | 0 | 0 | 0 |
| 7.407428  | 15.446161 | 5.264635 | 0 | 0 | 0 |
| 6.448461  | 16.344273 | 7.406481 | 0 | 0 | 0 |
| 8.600641  | 16.476444 | 7.892492 | 0 | 0 | 0 |
| 1.245442  | 5.118809  | 5.355005 | 0 | 0 | 0 |
| 2.443484  | 5.838886  | 8.622924 | 0 | 0 | 0 |
| 0.013795  | 5.795296  | 5.285730 | 0 | 0 | 0 |
| 1.210631  | 5.164204  | 8.541507 | 0 | 0 | 0 |
| 2.443506  | 7.279307  | 8.748318 | 0 | 0 | 0 |

|           |          |          |   |   |   |
|-----------|----------|----------|---|---|---|
| 3.708657  | 5.118963 | 5.353897 | 0 | 0 | 0 |
| 4.907998  | 5.843148 | 8.621230 | 0 | 0 | 0 |
| 2.477011  | 5.795606 | 5.283967 | 0 | 0 | 0 |
| 3.676791  | 5.165724 | 8.540005 | 0 | 0 | 0 |
| 4.907637  | 7.283976 | 8.747768 | 0 | 0 | 0 |
| 6.171844  | 5.118599 | 5.354330 | 0 | 0 | 0 |
| 7.370958  | 5.849291 | 8.620941 | 0 | 0 | 0 |
| 4.940290  | 5.795478 | 5.283402 | 0 | 0 | 0 |
| 6.140801  | 5.171085 | 8.537152 | 0 | 0 | 0 |
| 7.370710  | 7.289828 | 8.751319 | 0 | 0 | 0 |
| 8.635429  | 5.118198 | 5.355206 | 0 | 0 | 0 |
| 9.832333  | 5.851658 | 8.623372 | 0 | 0 | 0 |
| 7.403740  | 5.794978 | 5.285116 | 0 | 0 | 0 |
| 8.601944  | 5.175280 | 8.537586 | 0 | 0 | 0 |
| 9.832040  | 7.291102 | 8.757194 | 0 | 0 | 0 |
| 11.099301 | 5.118139 | 5.355778 | 0 | 0 | 0 |
| 12.294487 | 5.846734 | 8.623846 | 0 | 0 | 0 |
| 9.867501  | 5.794678 | 5.286784 | 0 | 0 | 0 |
| 11.062615 | 5.174090 | 8.538935 | 0 | 0 | 0 |
| 12.294275 | 7.287294 | 8.755327 | 0 | 0 | 0 |
| 13.562782 | 5.118287 | 5.356054 | 0 | 0 | 0 |
| 14.758955 | 5.839879 | 8.624340 | 0 | 0 | 0 |

|           |           |          |   |   |   |
|-----------|-----------|----------|---|---|---|
| 12.331181 | 5.794804  | 5.286924 | 0 | 0 | 0 |
| 13.525352 | 5.168439  | 8.540216 | 0 | 0 | 0 |
| 14.759167 | 7.280119  | 8.751789 | 0 | 0 | 0 |
| 0.014336  | 7.238301  | 5.190167 | 0 | 0 | 0 |
| 1.246890  | 9.380615  | 5.131604 | 0 | 0 | 0 |
| 1.210852  | 7.980592  | 8.795883 | 0 | 0 | 0 |
| 2.442140  | 10.122434 | 8.871408 | 0 | 0 | 0 |
| 0.015317  | 10.086865 | 5.140485 | 0 | 0 | 0 |
| 1.246057  | 7.942443  | 5.157748 | 0 | 0 | 0 |
| 1.210824  | 9.415918  | 8.857817 | 0 | 0 | 0 |
| 2.440724  | 11.555126 | 8.884137 | 0 | 0 | 0 |
| 2.477470  | 7.238419  | 5.185851 | 0 | 0 | 0 |
| 3.709968  | 9.380553  | 5.125659 | 0 | 0 | 0 |
| 3.675342  | 7.983601  | 8.793493 | 0 | 0 | 0 |
| 4.904874  | 10.129253 | 8.875180 | 0 | 0 | 0 |
| 2.478671  | 10.087127 | 5.126952 | 0 | 0 | 0 |
| 3.709392  | 7.942417  | 5.154413 | 0 | 0 | 0 |
| 3.675893  | 9.419704  | 8.854452 | 0 | 0 | 0 |
| 4.902634  | 11.565058 | 8.890860 | 0 | 0 | 0 |
| 4.940845  | 7.238299  | 5.185525 | 0 | 0 | 0 |
| 6.173182  | 9.380022  | 5.131732 | 0 | 0 | 0 |
| 6.138637  | 7.990443  | 8.796473 | 0 | 0 | 0 |

|           |           |          |   |   |   |
|-----------|-----------|----------|---|---|---|
| 7.367803  | 10.137604 | 8.894732 | 0 | 0 | 0 |
| 4.941960  | 10.086817 | 5.126998 | 0 | 0 | 0 |
| 6.172836  | 7.941986  | 5.157656 | 0 | 0 | 0 |
| 6.139386  | 9.426599  | 8.861638 | 0 | 0 | 0 |
| 7.364099  | 11.577214 | 8.929347 | 0 | 0 | 0 |
| 7.404261  | 7.237943  | 5.190115 | 0 | 0 | 0 |
| 8.637001  | 9.379701  | 5.145427 | 0 | 0 | 0 |
| 8.600855  | 7.995677  | 8.806165 | 0 | 0 | 0 |
| 9.830681  | 10.142862 | 8.928417 | 0 | 0 | 0 |
| 7.405532  | 10.086269 | 5.140638 | 0 | 0 | 0 |
| 8.636371  | 7.941660  | 5.165549 | 0 | 0 | 0 |
| 8.600773  | 9.432544  | 8.885323 | 0 | 0 | 0 |
| 9.829269  | 11.582438 | 9.000960 | 0 | 0 | 0 |
| 9.868054  | 7.237874  | 5.194891 | 0 | 0 | 0 |
| 11.101065 | 9.379793  | 5.151558 | 0 | 0 | 0 |
| 11.063307 | 7.994108  | 8.808185 | 0 | 0 | 0 |
| 12.298149 | 10.129431 | 8.903401 | 0 | 0 | 0 |
| 9.869303  | 10.085933 | 5.156309 | 0 | 0 | 0 |
| 11.100208 | 7.941749  | 5.168618 | 0 | 0 | 0 |
| 11.062057 | 9.430623  | 8.888392 | 0 | 0 | 0 |
| 12.302548 | 11.565567 | 8.946939 | 0 | 0 | 0 |
| 12.331694 | 7.237995  | 5.194469 | 0 | 0 | 0 |

|           |           |          |   |   |   |
|-----------|-----------|----------|---|---|---|
| 13.564367 | 9.380209  | 5.144347 | 0 | 0 | 0 |
| 13.527537 | 7.985546  | 8.801711 | 0 | 0 | 0 |
| 14.762327 | 10.123195 | 8.882854 | 0 | 0 | 0 |
| 12.332567 | 10.086366 | 5.155112 | 0 | 0 | 0 |
| 13.563503 | 7.942142  | 5.164851 | 0 | 0 | 0 |
| 13.527308 | 9.420405  | 8.869248 | 0 | 0 | 0 |
| 14.764303 | 11.557270 | 8.906463 | 0 | 0 | 0 |
| 0.016106  | 11.525163 | 5.166210 | 0 | 0 | 0 |
| 1.247700  | 13.675348 | 5.222087 | 0 | 0 | 0 |
| 1.212166  | 12.263355 | 8.894092 | 0 | 0 | 0 |
| 2.439982  | 14.387277 | 8.867485 | 0 | 0 | 0 |
| 0.016989  | 14.354079 | 5.272951 | 0 | 0 | 0 |
| 1.247937  | 12.229631 | 5.172747 | 0 | 0 | 0 |
| 1.214345  | 13.708176 | 8.887715 | 0 | 0 | 0 |
| 2.479583  | 11.525801 | 5.145468 | 0 | 0 | 0 |
| 3.712181  | 13.676356 | 5.195353 | 0 | 0 | 0 |
| 3.669320  | 12.262483 | 8.881842 | 0 | 0 | 0 |
| 4.893701  | 14.385890 | 8.860749 | 0 | 0 | 0 |
| 2.480004  | 14.355964 | 5.231485 | 0 | 0 | 0 |
| 3.711497  | 12.230218 | 5.156022 | 0 | 0 | 0 |
| 3.662122  | 13.703663 | 8.871173 | 0 | 0 | 0 |
| 4.942897  | 11.525420 | 5.143507 | 0 | 0 | 0 |

|           |           |          |   |   |   |
|-----------|-----------|----------|---|---|---|
| 6.176274  | 13.675051 | 5.200324 | 0 | 0 | 0 |
| 6.131455  | 12.279109 | 8.905909 | 0 | 0 | 0 |
| 7.366144  | 14.429670 | 8.882028 | 0 | 0 | 0 |
| 4.943471  | 14.356269 | 5.213748 | 0 | 0 | 0 |
| 6.174933  | 12.229172 | 5.166227 | 0 | 0 | 0 |
| 6.118786  | 13.723364 | 8.877654 | 0 | 0 | 0 |
| 7.406253  | 11.524130 | 5.163677 | 0 | 0 | 0 |
| 8.638758  | 13.673235 | 5.243767 | 0 | 0 | 0 |
| 8.589395  | 12.290668 | 9.002075 | 0 | 0 | 0 |
| 9.838554  | 14.390477 | 9.303050 | 0 | 0 | 0 |
| 7.406718  | 14.353861 | 5.235297 | 0 | 0 | 0 |
| 8.638200  | 12.227779 | 5.198004 | 0 | 0 | 0 |
| 8.555707  | 13.735963 | 9.045978 | 0 | 0 | 0 |
| 9.869847  | 11.523381 | 5.188925 | 0 | 0 | 0 |
| 11.100990 | 13.673517 | 5.276688 | 0 | 0 | 0 |
| 11.073784 | 12.273332 | 9.008906 | 0 | 0 | 0 |
| 12.306938 | 14.388964 | 9.003328 | 0 | 0 | 0 |
| 9.869336  | 14.352999 | 5.295636 | 0 | 0 | 0 |
| 11.101606 | 12.228036 | 5.216496 | 0 | 0 | 0 |
| 11.114641 | 13.706356 | 9.078765 | 0 | 0 | 0 |
| 12.333258 | 11.524106 | 5.188149 | 0 | 0 | 0 |
| 13.564299 | 13.673994 | 5.259947 | 0 | 0 | 0 |

|           |           |           |          |           |          |
|-----------|-----------|-----------|----------|-----------|----------|
| 13.536260 | 12.266008 | 8.935868  | 0        | 0         | 0        |
| 14.762665 | 14.389058 | 8.904260  | 0        | 0         | 0        |
| 12.333972 | 14.352875 | 5.307100  | 0        | 0         | 0        |
| 13.565052 | 12.228698 | 5.201052  | 0        | 0         | 0        |
| 13.549212 | 13.706896 | 8.943993  | 0        | 0         | 0        |
| 9.911257  | 15.531849 | 9.994722  | 0.270913 | -0.095741 | 0.129572 |
| 7.288643  | 16.408837 | 8.698126  | 0        | 0         | 0        |
| 10.025257 | 16.503653 | 10.644976 | 0.874409 | -0.255961 | 0.265601 |

6 f = 2.689367 THz 16.897791 2PiTHz 89.707622 cm-1 11.122332 meV

|           | X        | Y        | Z | dx | dy | dz |
|-----------|----------|----------|---|----|----|----|
| 1.245750  | 4.028696 | 5.439790 | 0 | 0  | 0  |    |
| 1.210240  | 4.075813 | 8.437264 | 0 | 0  | 0  |    |
| 3.708620  | 4.028896 | 5.439647 | 0 | 0  | 0  |    |
| 3.679981  | 4.077333 | 8.436900 | 0 | 0  | 0  |    |
| 6.171574  | 4.028537 | 5.439423 | 0 | 0  | 0  |    |
| 6.144822  | 4.082922 | 8.432952 | 0 | 0  | 0  |    |
| 8.635129  | 4.028007 | 5.438685 | 0 | 0  | 0  |    |
| 8.603386  | 4.087320 | 8.430892 | 0 | 0  | 0  |    |
| 11.099276 | 4.027838 | 5.438849 | 0 | 0  | 0  |    |
| 11.060208 | 4.086191 | 8.430988 | 0 | 0  | 0  |    |
| 13.563114 | 4.028068 | 5.439721 | 0 | 0  | 0  |    |

|           |           |          |   |   |   |
|-----------|-----------|----------|---|---|---|
| 13.521407 | 4.080469  | 8.433485 | 0 | 0 | 0 |
| 2.442410  | 15.480732 | 8.852243 | 0 | 0 | 0 |
| 0.017143  | 15.446242 | 5.324686 | 0 | 0 | 0 |
| 4.860405  | 15.477285 | 8.866232 | 0 | 0 | 0 |
| 2.480161  | 15.448544 | 5.275619 | 0 | 0 | 0 |
| 4.943820  | 15.449251 | 5.248689 | 0 | 0 | 0 |
| 12.315308 | 15.482418 | 9.002109 | 0 | 0 | 0 |
| 9.867716  | 15.445563 | 5.341755 | 0 | 0 | 0 |
| 14.762794 | 15.482453 | 8.899515 | 0 | 0 | 0 |
| 12.333845 | 15.445098 | 5.361284 | 0 | 0 | 0 |
| 7.407428  | 15.446161 | 5.264635 | 0 | 0 | 0 |
| 6.448461  | 16.344273 | 7.406481 | 0 | 0 | 0 |
| 8.600641  | 16.476444 | 7.892492 | 0 | 0 | 0 |
| 1.245442  | 5.118809  | 5.355005 | 0 | 0 | 0 |
| 2.443484  | 5.838886  | 8.622924 | 0 | 0 | 0 |
| 0.013795  | 5.795296  | 5.285730 | 0 | 0 | 0 |
| 1.210631  | 5.164204  | 8.541507 | 0 | 0 | 0 |
| 2.443506  | 7.279307  | 8.748318 | 0 | 0 | 0 |
| 3.708657  | 5.118963  | 5.353897 | 0 | 0 | 0 |
| 4.907998  | 5.843148  | 8.621230 | 0 | 0 | 0 |
| 2.477011  | 5.795606  | 5.283967 | 0 | 0 | 0 |
| 3.676791  | 5.165724  | 8.540005 | 0 | 0 | 0 |

|           |          |          |   |   |   |
|-----------|----------|----------|---|---|---|
| 4.907637  | 7.283976 | 8.747768 | 0 | 0 | 0 |
| 6.171844  | 5.118599 | 5.354330 | 0 | 0 | 0 |
| 7.370958  | 5.849291 | 8.620941 | 0 | 0 | 0 |
| 4.940290  | 5.795478 | 5.283402 | 0 | 0 | 0 |
| 6.140801  | 5.171085 | 8.537152 | 0 | 0 | 0 |
| 7.370710  | 7.289828 | 8.751319 | 0 | 0 | 0 |
| 8.635429  | 5.118198 | 5.355206 | 0 | 0 | 0 |
| 9.832333  | 5.851658 | 8.623372 | 0 | 0 | 0 |
| 7.403740  | 5.794978 | 5.285116 | 0 | 0 | 0 |
| 8.601944  | 5.175280 | 8.537586 | 0 | 0 | 0 |
| 9.832040  | 7.291102 | 8.757194 | 0 | 0 | 0 |
| 11.099301 | 5.118139 | 5.355778 | 0 | 0 | 0 |
| 12.294487 | 5.846734 | 8.623846 | 0 | 0 | 0 |
| 9.867501  | 5.794678 | 5.286784 | 0 | 0 | 0 |
| 11.062615 | 5.174090 | 8.538935 | 0 | 0 | 0 |
| 12.294275 | 7.287294 | 8.755327 | 0 | 0 | 0 |
| 13.562782 | 5.118287 | 5.356054 | 0 | 0 | 0 |
| 14.758955 | 5.839879 | 8.624340 | 0 | 0 | 0 |
| 12.331181 | 5.794804 | 5.286924 | 0 | 0 | 0 |
| 13.525352 | 5.168439 | 8.540216 | 0 | 0 | 0 |
| 14.759167 | 7.280119 | 8.751789 | 0 | 0 | 0 |
| 0.014336  | 7.238301 | 5.190167 | 0 | 0 | 0 |

|          |           |          |   |   |   |
|----------|-----------|----------|---|---|---|
| 1.246890 | 9.380615  | 5.131604 | 0 | 0 | 0 |
| 1.210852 | 7.980592  | 8.795883 | 0 | 0 | 0 |
| 2.442140 | 10.122434 | 8.871408 | 0 | 0 | 0 |
| 0.015317 | 10.086865 | 5.140485 | 0 | 0 | 0 |
| 1.246057 | 7.942443  | 5.157748 | 0 | 0 | 0 |
| 1.210824 | 9.415918  | 8.857817 | 0 | 0 | 0 |
| 2.440724 | 11.555126 | 8.884137 | 0 | 0 | 0 |
| 2.477470 | 7.238419  | 5.185851 | 0 | 0 | 0 |
| 3.709968 | 9.380553  | 5.125659 | 0 | 0 | 0 |
| 3.675342 | 7.983601  | 8.793493 | 0 | 0 | 0 |
| 4.904874 | 10.129253 | 8.875180 | 0 | 0 | 0 |
| 2.478671 | 10.087127 | 5.126952 | 0 | 0 | 0 |
| 3.709392 | 7.942417  | 5.154413 | 0 | 0 | 0 |
| 3.675893 | 9.419704  | 8.854452 | 0 | 0 | 0 |
| 4.902634 | 11.565058 | 8.890860 | 0 | 0 | 0 |
| 4.940845 | 7.238299  | 5.185525 | 0 | 0 | 0 |
| 6.173182 | 9.380022  | 5.131732 | 0 | 0 | 0 |
| 6.138637 | 7.990443  | 8.796473 | 0 | 0 | 0 |
| 7.367803 | 10.137604 | 8.894732 | 0 | 0 | 0 |
| 4.941960 | 10.086817 | 5.126998 | 0 | 0 | 0 |
| 6.172836 | 7.941986  | 5.157656 | 0 | 0 | 0 |
| 6.139386 | 9.426599  | 8.861638 | 0 | 0 | 0 |

|           |           |          |   |   |   |
|-----------|-----------|----------|---|---|---|
| 7.364099  | 11.577214 | 8.929347 | 0 | 0 | 0 |
| 7.404261  | 7.237943  | 5.190115 | 0 | 0 | 0 |
| 8.637001  | 9.379701  | 5.145427 | 0 | 0 | 0 |
| 8.600855  | 7.995677  | 8.806165 | 0 | 0 | 0 |
| 9.830681  | 10.142862 | 8.928417 | 0 | 0 | 0 |
| 7.405532  | 10.086269 | 5.140638 | 0 | 0 | 0 |
| 8.636371  | 7.941660  | 5.165549 | 0 | 0 | 0 |
| 8.600773  | 9.432544  | 8.885323 | 0 | 0 | 0 |
| 9.829269  | 11.582438 | 9.000960 | 0 | 0 | 0 |
| 9.868054  | 7.237874  | 5.194891 | 0 | 0 | 0 |
| 11.101065 | 9.379793  | 5.151558 | 0 | 0 | 0 |
| 11.063307 | 7.994108  | 8.808185 | 0 | 0 | 0 |
| 12.298149 | 10.129431 | 8.903401 | 0 | 0 | 0 |
| 9.869303  | 10.085933 | 5.156309 | 0 | 0 | 0 |
| 11.100208 | 7.941749  | 5.168618 | 0 | 0 | 0 |
| 11.062057 | 9.430623  | 8.888392 | 0 | 0 | 0 |
| 12.302548 | 11.565567 | 8.946939 | 0 | 0 | 0 |
| 12.331694 | 7.237995  | 5.194469 | 0 | 0 | 0 |
| 13.564367 | 9.380209  | 5.144347 | 0 | 0 | 0 |
| 13.527537 | 7.985546  | 8.801711 | 0 | 0 | 0 |
| 14.762327 | 10.123195 | 8.882854 | 0 | 0 | 0 |
| 12.332567 | 10.086366 | 5.155112 | 0 | 0 | 0 |

|           |           |          |   |   |   |
|-----------|-----------|----------|---|---|---|
| 13.563503 | 7.942142  | 5.164851 | 0 | 0 | 0 |
| 13.527308 | 9.420405  | 8.869248 | 0 | 0 | 0 |
| 14.764303 | 11.557270 | 8.906463 | 0 | 0 | 0 |
| 0.016106  | 11.525163 | 5.166210 | 0 | 0 | 0 |
| 1.247700  | 13.675348 | 5.222087 | 0 | 0 | 0 |
| 1.212166  | 12.263355 | 8.894092 | 0 | 0 | 0 |
| 2.439982  | 14.387277 | 8.867485 | 0 | 0 | 0 |
| 0.016989  | 14.354079 | 5.272951 | 0 | 0 | 0 |
| 1.247937  | 12.229631 | 5.172747 | 0 | 0 | 0 |
| 1.214345  | 13.708176 | 8.887715 | 0 | 0 | 0 |
| 2.479583  | 11.525801 | 5.145468 | 0 | 0 | 0 |
| 3.712181  | 13.676356 | 5.195353 | 0 | 0 | 0 |
| 3.669320  | 12.262483 | 8.881842 | 0 | 0 | 0 |
| 4.893701  | 14.385890 | 8.860749 | 0 | 0 | 0 |
| 2.480004  | 14.355964 | 5.231485 | 0 | 0 | 0 |
| 3.711497  | 12.230218 | 5.156022 | 0 | 0 | 0 |
| 3.662122  | 13.703663 | 8.871173 | 0 | 0 | 0 |
| 4.942897  | 11.525420 | 5.143507 | 0 | 0 | 0 |
| 6.176274  | 13.675051 | 5.200324 | 0 | 0 | 0 |
| 6.131455  | 12.279109 | 8.905909 | 0 | 0 | 0 |
| 7.366144  | 14.429670 | 8.882028 | 0 | 0 | 0 |
| 4.943471  | 14.356269 | 5.213748 | 0 | 0 | 0 |

|           |           |          |   |   |   |
|-----------|-----------|----------|---|---|---|
| 6.174933  | 12.229172 | 5.166227 | 0 | 0 | 0 |
| 6.118786  | 13.723364 | 8.877654 | 0 | 0 | 0 |
| 7.406253  | 11.524130 | 5.163677 | 0 | 0 | 0 |
| 8.638758  | 13.673235 | 5.243767 | 0 | 0 | 0 |
| 8.589395  | 12.290668 | 9.002075 | 0 | 0 | 0 |
| 9.838554  | 14.390477 | 9.303050 | 0 | 0 | 0 |
| 7.406718  | 14.353861 | 5.235297 | 0 | 0 | 0 |
| 8.638200  | 12.227779 | 5.198004 | 0 | 0 | 0 |
| 8.555707  | 13.735963 | 9.045978 | 0 | 0 | 0 |
| 9.869847  | 11.523381 | 5.188925 | 0 | 0 | 0 |
| 11.100990 | 13.673517 | 5.276688 | 0 | 0 | 0 |
| 11.073784 | 12.273332 | 9.008906 | 0 | 0 | 0 |
| 12.306938 | 14.388964 | 9.003328 | 0 | 0 | 0 |
| 9.869336  | 14.352999 | 5.295636 | 0 | 0 | 0 |
| 11.101606 | 12.228036 | 5.216496 | 0 | 0 | 0 |
| 11.114641 | 13.706356 | 9.078765 | 0 | 0 | 0 |
| 12.333258 | 11.524106 | 5.188149 | 0 | 0 | 0 |
| 13.564299 | 13.673994 | 5.259947 | 0 | 0 | 0 |
| 13.536260 | 12.266008 | 8.935868 | 0 | 0 | 0 |
| 14.762665 | 14.389058 | 8.904260 | 0 | 0 | 0 |
| 12.333972 | 14.352875 | 5.307100 | 0 | 0 | 0 |
| 13.565052 | 12.228698 | 5.201052 | 0 | 0 | 0 |

|           |           |           |           |           |          |
|-----------|-----------|-----------|-----------|-----------|----------|
| 13.549212 | 13.706896 | 8.943993  | 0         | 0         | 0        |
| 9.911257  | 15.531849 | 9.994722  | -0.114679 | -0.196333 | 0.334400 |
| 7.288643  | 16.408837 | 8.698126  | 0         | 0         | 0        |
| 10.025257 | 16.503653 | 10.644976 | -0.377230 | -0.421730 | 0.718554 |

Finite differences POTIM= 1.5000000000000000E-002

LATTYP: Found a simple orthorhombic cell.

ALAT = 14.7806000000

B/A-ratio = 1.2466138046

C/A-ratio = 1.4433717170

Lattice vectors:

A1 = (-14.7806000000, 0.0000000000, 0.0000000000)

A2 = ( 0.0000000000, 0.0000000000, -18.4257000000)

A3 = ( 0.0000000000, -21.3339000000, 0.0000000000)

Analysis of symmetry for initial positions (statically):

---

Subroutine PRICEL returns:

Original cell was already a primitive cell.

Routine SETGRP: Setting up the symmetry group for a simple orthorhombic supercell.

Subroutine GETGRP returns: Found 1 space group operations (whereof 1 operations were pure point group operations) out of a pool of 8 trial point group operations.

The static configuration has the point symmetry  $C_1$ .

Analysis of symmetry for dynamics (positions and initial velocities):

---

Subroutine PRICEL returns:

Original cell was already a primitive cell.

Routine SETGRP: Setting up the symmetry group for a simple orthorhombic supercell.

Subroutine GETGRP returns: Found 1 space group operations

(whereof 1 operations were pure point group operations)

out of a pool of 8 trial point group operations.

The dynamic configuration has the point symmetry  $C_1$ .

Analysis of constrained symmetry for selective dynamics:

=====

Subroutine PRICEL returns:

Original cell was already a primitive cell.

Routine SETGRP: Setting up the symmetry group for a

simple orthorhombic supercell.

Subroutine GETGRP returns: Found 1 space group operations

(whereof 1 operations were pure point group operations)

out of a pool of 8 trial point group operations.

The constrained configuration has the point symmetry  $C_1$ .

Analysis of structural, dynamic, and magnetic symmetry:

---

Subroutine PRICEL returns:

Original cell was already a primitive cell.

Routine SETGRP: Setting up the symmetry group for a  
simple orthorhombic supercell.

Subroutine GETGRP returns: Found 1 space group operations

(whereof 1 operations were pure point group operations)

out of a pool of 8 trial point group operations.

The magnetic configuration has the point symmetry  $C_1$ .

Subroutine INISYM returns: Found 1 space group operations

(whereof 1 operations are pure point group operations),

and found 1 'primitive' translations

KPOINTS: KPT-Resolved Value to Generate K-Mesh: 0

Automatic generation of k-mesh.

Space group operators:

| irotn | det(A)   | alpha    | n_x      | n_y      | n_z      | tau_x    | tau_y    | tau_z    |
|-------|----------|----------|----------|----------|----------|----------|----------|----------|
| 1     | 1.000000 | 0.000000 | 1.000000 | 0.000000 | 0.000000 | 0.000000 | 0.000000 | 0.000000 |

Subroutine IBZKPT returns following result:

=====

Found 1 irreducible k-points:

Following reciprocal coordinates:

| Coordinates |          |          | Weight   |
|-------------|----------|----------|----------|
| 0.000000    | 0.000000 | 0.000000 | 1.000000 |

Following cartesian coordinates:

| Coordinates |          |          | Weight   |
|-------------|----------|----------|----------|
| 0.000000    | 0.000000 | 0.000000 | 1.000000 |

LOOP+: cpu time 178.2267: real time 179.2464

4ORBIT: cpu time 0.0000: real time 0.0000

total charge

| # of ion | s     | p     | d     | tot   |
|----------|-------|-------|-------|-------|
| -----    |       |       |       |       |
| 1        | 0.646 | 0.043 | 0.000 | 0.690 |
| 2        | 0.646 | 0.043 | 0.000 | 0.690 |
| 3        | 0.646 | 0.043 | 0.000 | 0.690 |
| 4        | 0.646 | 0.043 | 0.000 | 0.690 |
| 5        | 0.646 | 0.043 | 0.000 | 0.690 |
| 6        | 0.646 | 0.043 | 0.000 | 0.690 |

|    |       |       |       |       |
|----|-------|-------|-------|-------|
| 7  | 0.646 | 0.043 | 0.000 | 0.690 |
| 8  | 0.646 | 0.043 | 0.000 | 0.690 |
| 9  | 0.646 | 0.043 | 0.000 | 0.690 |
| 10 | 0.646 | 0.043 | 0.000 | 0.690 |
| 11 | 0.646 | 0.043 | 0.000 | 0.690 |
| 12 | 0.646 | 0.043 | 0.000 | 0.690 |
| 13 | 0.646 | 0.043 | 0.000 | 0.689 |
| 14 | 0.646 | 0.043 | 0.000 | 0.689 |
| 15 | 0.648 | 0.045 | 0.000 | 0.693 |
| 16 | 0.646 | 0.043 | 0.000 | 0.689 |
| 17 | 0.646 | 0.043 | 0.000 | 0.689 |
| 18 | 0.646 | 0.043 | 0.000 | 0.689 |
| 19 | 0.646 | 0.043 | 0.000 | 0.689 |
| 20 | 0.646 | 0.043 | 0.000 | 0.689 |
| 21 | 0.646 | 0.043 | 0.000 | 0.689 |
| 22 | 0.646 | 0.044 | 0.000 | 0.690 |
| 23 | 0.541 | 0.015 | 0.000 | 0.557 |
| 24 | 0.541 | 0.015 | 0.000 | 0.556 |
| 25 | 0.870 | 1.763 | 0.000 | 2.633 |
| 26 | 0.867 | 1.785 | 0.000 | 2.653 |
| 27 | 0.867 | 1.786 | 0.000 | 2.653 |
| 28 | 0.870 | 1.762 | 0.000 | 2.632 |

|    |       |       |       |       |
|----|-------|-------|-------|-------|
| 29 | 0.865 | 1.783 | 0.000 | 2.648 |
| 30 | 0.870 | 1.763 | 0.000 | 2.633 |
| 31 | 0.867 | 1.786 | 0.000 | 2.653 |
| 32 | 0.867 | 1.786 | 0.000 | 2.653 |
| 33 | 0.870 | 1.762 | 0.000 | 2.632 |
| 34 | 0.865 | 1.783 | 0.000 | 2.648 |
| 35 | 0.870 | 1.763 | 0.000 | 2.633 |
| 36 | 0.868 | 1.787 | 0.000 | 2.654 |
| 37 | 0.867 | 1.786 | 0.000 | 2.653 |
| 38 | 0.870 | 1.763 | 0.000 | 2.633 |
| 39 | 0.865 | 1.784 | 0.000 | 2.649 |
| 40 | 0.870 | 1.763 | 0.000 | 2.633 |
| 41 | 0.868 | 1.787 | 0.000 | 2.655 |
| 42 | 0.867 | 1.786 | 0.000 | 2.653 |
| 43 | 0.871 | 1.764 | 0.000 | 2.634 |
| 44 | 0.865 | 1.783 | 0.000 | 2.648 |
| 45 | 0.870 | 1.763 | 0.000 | 2.633 |
| 46 | 0.867 | 1.786 | 0.000 | 2.653 |
| 47 | 0.867 | 1.786 | 0.000 | 2.653 |
| 48 | 0.871 | 1.763 | 0.000 | 2.634 |
| 49 | 0.865 | 1.783 | 0.000 | 2.648 |
| 50 | 0.870 | 1.763 | 0.000 | 2.633 |

|    |       |       |       |       |
|----|-------|-------|-------|-------|
| 51 | 0.867 | 1.786 | 0.000 | 2.653 |
| 52 | 0.867 | 1.786 | 0.000 | 2.653 |
| 53 | 0.870 | 1.762 | 0.000 | 2.632 |
| 54 | 0.865 | 1.784 | 0.000 | 2.648 |
| 55 | 0.865 | 1.784 | 0.000 | 2.649 |
| 56 | 0.865 | 1.786 | 0.000 | 2.651 |
| 57 | 0.866 | 1.787 | 0.000 | 2.653 |
| 58 | 0.866 | 1.790 | 0.000 | 2.656 |
| 59 | 0.865 | 1.786 | 0.000 | 2.651 |
| 60 | 0.866 | 1.786 | 0.000 | 2.651 |
| 61 | 0.866 | 1.788 | 0.000 | 2.654 |
| 62 | 0.867 | 1.791 | 0.000 | 2.658 |
| 63 | 0.865 | 1.784 | 0.000 | 2.649 |
| 64 | 0.865 | 1.786 | 0.000 | 2.651 |
| 65 | 0.866 | 1.787 | 0.000 | 2.652 |
| 66 | 0.865 | 1.788 | 0.000 | 2.653 |
| 67 | 0.865 | 1.786 | 0.000 | 2.651 |
| 68 | 0.866 | 1.785 | 0.000 | 2.651 |
| 69 | 0.865 | 1.787 | 0.000 | 2.652 |
| 70 | 0.866 | 1.787 | 0.000 | 2.653 |
| 71 | 0.865 | 1.784 | 0.000 | 2.649 |
| 72 | 0.865 | 1.786 | 0.000 | 2.651 |

|    |       |       |       |       |
|----|-------|-------|-------|-------|
| 73 | 0.866 | 1.786 | 0.000 | 2.652 |
| 74 | 0.864 | 1.785 | 0.000 | 2.649 |
| 75 | 0.865 | 1.786 | 0.000 | 2.651 |
| 76 | 0.866 | 1.786 | 0.000 | 2.651 |
| 77 | 0.865 | 1.786 | 0.000 | 2.651 |
| 78 | 0.865 | 1.784 | 0.000 | 2.649 |
| 79 | 0.865 | 1.784 | 0.000 | 2.649 |
| 80 | 0.865 | 1.786 | 0.000 | 2.651 |
| 81 | 0.865 | 1.785 | 0.000 | 2.650 |
| 82 | 0.863 | 1.782 | 0.000 | 2.645 |
| 83 | 0.865 | 1.786 | 0.000 | 2.651 |
| 84 | 0.866 | 1.786 | 0.000 | 2.651 |
| 85 | 0.865 | 1.784 | 0.000 | 2.648 |
| 86 | 0.862 | 1.774 | 0.000 | 2.636 |
| 87 | 0.865 | 1.784 | 0.000 | 2.649 |
| 88 | 0.865 | 1.787 | 0.000 | 2.652 |
| 89 | 0.865 | 1.785 | 0.000 | 2.650 |
| 90 | 0.865 | 1.788 | 0.000 | 2.653 |
| 91 | 0.865 | 1.786 | 0.000 | 2.651 |
| 92 | 0.866 | 1.786 | 0.000 | 2.651 |
| 93 | 0.864 | 1.783 | 0.000 | 2.647 |
| 94 | 0.866 | 1.785 | 0.000 | 2.651 |

|     |       |       |       |       |
|-----|-------|-------|-------|-------|
| 95  | 0.865 | 1.784 | 0.000 | 2.649 |
| 96  | 0.865 | 1.786 | 0.000 | 2.651 |
| 97  | 0.866 | 1.787 | 0.000 | 2.653 |
| 98  | 0.866 | 1.789 | 0.000 | 2.655 |
| 99  | 0.865 | 1.786 | 0.000 | 2.651 |
| 100 | 0.866 | 1.786 | 0.000 | 2.651 |
| 101 | 0.865 | 1.787 | 0.000 | 2.652 |
| 102 | 0.867 | 1.790 | 0.000 | 2.657 |
| 103 | 0.865 | 1.786 | 0.000 | 2.651 |
| 104 | 0.867 | 1.785 | 0.000 | 2.653 |
| 105 | 0.866 | 1.786 | 0.000 | 2.652 |
| 106 | 0.870 | 1.778 | 0.000 | 2.648 |
| 107 | 0.869 | 1.765 | 0.000 | 2.635 |
| 108 | 0.865 | 1.783 | 0.000 | 2.648 |
| 109 | 0.869 | 1.789 | 0.000 | 2.658 |
| 110 | 0.865 | 1.786 | 0.000 | 2.651 |
| 111 | 0.867 | 1.785 | 0.000 | 2.653 |
| 112 | 0.867 | 1.789 | 0.000 | 2.655 |
| 113 | 0.871 | 1.782 | 0.000 | 2.653 |
| 114 | 0.869 | 1.765 | 0.000 | 2.634 |
| 115 | 0.865 | 1.783 | 0.000 | 2.648 |
| 116 | 0.870 | 1.791 | 0.000 | 2.661 |

|     |       |       |       |       |
|-----|-------|-------|-------|-------|
| 117 | 0.865 | 1.786 | 0.000 | 2.651 |
| 118 | 0.867 | 1.786 | 0.000 | 2.653 |
| 119 | 0.865 | 1.782 | 0.000 | 2.647 |
| 120 | 0.857 | 1.707 | 0.000 | 2.564 |
| 121 | 0.869 | 1.765 | 0.000 | 2.634 |
| 122 | 0.865 | 1.783 | 0.000 | 2.648 |
| 123 | 0.866 | 1.778 | 0.000 | 2.644 |
| 124 | 0.866 | 1.786 | 0.000 | 2.652 |
| 125 | 0.867 | 1.785 | 0.000 | 2.653 |
| 126 | 0.862 | 1.776 | 0.000 | 2.638 |
| 127 | 0.849 | 1.831 | 0.000 | 2.680 |
| 128 | 0.870 | 1.767 | 0.000 | 2.637 |
| 129 | 0.865 | 1.783 | 0.000 | 2.648 |
| 130 | 0.860 | 1.757 | 0.000 | 2.617 |
| 131 | 0.866 | 1.786 | 0.000 | 2.652 |
| 132 | 0.867 | 1.784 | 0.000 | 2.652 |
| 133 | 0.864 | 1.787 | 0.000 | 2.651 |
| 134 | 0.869 | 1.790 | 0.000 | 2.659 |
| 135 | 0.869 | 1.767 | 0.000 | 2.636 |
| 136 | 0.865 | 1.783 | 0.000 | 2.648 |
| 137 | 0.866 | 1.772 | 0.000 | 2.638 |
| 138 | 0.866 | 1.786 | 0.000 | 2.652 |

|     |       |       |       |       |
|-----|-------|-------|-------|-------|
| 139 | 0.867 | 1.785 | 0.000 | 2.652 |
| 140 | 0.866 | 1.788 | 0.000 | 2.654 |
| 141 | 0.870 | 1.779 | 0.000 | 2.649 |
| 142 | 0.869 | 1.766 | 0.000 | 2.635 |
| 143 | 0.865 | 1.783 | 0.000 | 2.648 |
| 144 | 0.869 | 1.790 | 0.000 | 2.659 |
| 145 | 0.946 | 1.730 | 0.000 | 2.676 |
| 146 | 1.240 | 1.546 | 0.074 | 2.860 |
| 147 | 1.635 | 3.538 | 0.000 | 5.173 |

-----

tot            123.067 221.574    0.074 344.715

magnetization (x)

| # of ion | s | p | d | tot |
|----------|---|---|---|-----|
|----------|---|---|---|-----|

-----

|   |        |        |       |        |
|---|--------|--------|-------|--------|
| 1 | 0.000  | -0.000 | 0.000 | 0.000  |
| 2 | -0.000 | 0.000  | 0.000 | -0.000 |
| 3 | 0.000  | -0.000 | 0.000 | 0.000  |
| 4 | -0.000 | 0.000  | 0.000 | -0.000 |

|    |        |        |       |        |
|----|--------|--------|-------|--------|
| 5  | 0.000  | -0.000 | 0.000 | 0.000  |
| 6  | -0.000 | 0.000  | 0.000 | -0.000 |
| 7  | 0.000  | -0.000 | 0.000 | 0.000  |
| 8  | -0.000 | 0.000  | 0.000 | -0.000 |
| 9  | 0.000  | -0.000 | 0.000 | 0.000  |
| 10 | -0.000 | 0.000  | 0.000 | -0.000 |
| 11 | 0.000  | -0.000 | 0.000 | 0.000  |
| 12 | -0.000 | 0.000  | 0.000 | -0.000 |
| 13 | 0.000  | -0.000 | 0.000 | 0.000  |
| 14 | -0.004 | 0.002  | 0.000 | -0.002 |
| 15 | 0.000  | -0.000 | 0.000 | 0.000  |
| 16 | -0.004 | 0.002  | 0.000 | -0.002 |
| 17 | -0.004 | 0.002  | 0.000 | -0.002 |
| 18 | 0.000  | -0.000 | 0.000 | 0.000  |
| 19 | -0.003 | 0.001  | 0.000 | -0.002 |
| 20 | 0.000  | -0.000 | 0.000 | 0.000  |
| 21 | -0.003 | 0.002  | 0.000 | -0.002 |
| 22 | -0.003 | 0.002  | 0.000 | -0.002 |
| 23 | -0.000 | 0.000  | 0.000 | -0.000 |
| 24 | -0.000 | 0.000  | 0.000 | -0.000 |
| 25 | -0.000 | -0.007 | 0.000 | -0.008 |
| 26 | -0.000 | -0.002 | 0.000 | -0.002 |

|    |        |        |       |        |
|----|--------|--------|-------|--------|
| 27 | 0.000  | 0.003  | 0.000 | 0.003  |
| 28 | 0.000  | 0.005  | 0.000 | 0.005  |
| 29 | 0.000  | 0.003  | 0.000 | 0.003  |
| 30 | -0.000 | -0.007 | 0.000 | -0.008 |
| 31 | -0.000 | -0.002 | 0.000 | -0.002 |
| 32 | 0.000  | 0.003  | 0.000 | 0.003  |
| 33 | 0.000  | 0.005  | 0.000 | 0.005  |
| 34 | 0.000  | 0.002  | 0.000 | 0.002  |
| 35 | -0.000 | -0.007 | 0.000 | -0.008 |
| 36 | -0.000 | -0.002 | 0.000 | -0.002 |
| 37 | 0.000  | 0.003  | 0.000 | 0.003  |
| 38 | 0.000  | 0.006  | 0.000 | 0.007  |
| 39 | 0.000  | 0.002  | 0.000 | 0.002  |
| 40 | -0.000 | -0.007 | 0.000 | -0.008 |
| 41 | -0.000 | -0.002 | 0.000 | -0.002 |
| 42 | 0.000  | 0.002  | 0.000 | 0.003  |
| 43 | 0.000  | 0.005  | 0.000 | 0.005  |
| 44 | 0.000  | 0.004  | 0.000 | 0.004  |
| 45 | -0.000 | -0.007 | 0.000 | -0.008 |
| 46 | -0.000 | -0.002 | 0.000 | -0.002 |
| 47 | 0.000  | 0.002  | 0.000 | 0.003  |
| 48 | 0.000  | 0.005  | 0.000 | 0.006  |

|    |        |        |       |        |
|----|--------|--------|-------|--------|
| 49 | 0.000  | 0.001  | 0.000 | 0.001  |
| 50 | -0.000 | -0.007 | 0.000 | -0.008 |
| 51 | -0.000 | -0.002 | 0.000 | -0.002 |
| 52 | 0.000  | 0.002  | 0.000 | 0.003  |
| 53 | 0.000  | 0.006  | 0.000 | 0.007  |
| 54 | 0.000  | 0.002  | 0.000 | 0.002  |
| 55 | -0.000 | -0.005 | 0.000 | -0.006 |
| 56 | -0.000 | -0.007 | 0.000 | -0.007 |
| 57 | -0.000 | -0.001 | 0.000 | -0.001 |
| 58 | -0.000 | -0.001 | 0.000 | -0.001 |
| 59 | 0.000  | 0.006  | 0.000 | 0.007  |
| 60 | 0.000  | 0.003  | 0.000 | 0.003  |
| 61 | 0.000  | 0.001  | 0.000 | 0.001  |
| 62 | 0.000  | 0.003  | 0.000 | 0.003  |
| 63 | -0.000 | -0.005 | 0.000 | -0.006 |
| 64 | -0.000 | -0.007 | 0.000 | -0.007 |
| 65 | -0.000 | -0.001 | 0.000 | -0.001 |
| 66 | -0.000 | -0.001 | 0.000 | -0.001 |
| 67 | 0.000  | 0.006  | 0.000 | 0.006  |
| 68 | 0.000  | 0.003  | 0.000 | 0.003  |
| 69 | 0.000  | 0.001  | 0.000 | 0.001  |
| 70 | 0.000  | 0.002  | 0.000 | 0.002  |

|    |        |        |       |        |
|----|--------|--------|-------|--------|
| 71 | -0.000 | -0.005 | 0.000 | -0.006 |
| 72 | -0.000 | -0.007 | 0.000 | -0.007 |
| 73 | -0.000 | -0.001 | 0.000 | -0.001 |
| 74 | -0.000 | -0.002 | 0.000 | -0.002 |
| 75 | 0.000  | 0.006  | 0.000 | 0.007  |
| 76 | 0.000  | 0.003  | 0.000 | 0.004  |
| 77 | 0.000  | 0.003  | 0.000 | 0.003  |
| 78 | 0.000  | 0.001  | 0.000 | 0.001  |
| 79 | -0.000 | -0.005 | 0.000 | -0.006 |
| 80 | -0.000 | -0.007 | 0.000 | -0.007 |
| 81 | -0.000 | -0.001 | 0.000 | -0.002 |
| 82 | -0.000 | -0.002 | 0.000 | -0.002 |
| 83 | 0.001  | 0.007  | 0.000 | 0.008  |
| 84 | 0.000  | 0.003  | 0.000 | 0.003  |
| 85 | 0.000  | 0.002  | 0.000 | 0.002  |
| 86 | 0.000  | 0.005  | 0.000 | 0.006  |
| 87 | -0.000 | -0.005 | 0.000 | -0.005 |
| 88 | -0.000 | -0.007 | 0.000 | -0.007 |
| 89 | -0.000 | -0.001 | 0.000 | -0.002 |
| 90 | -0.000 | -0.002 | 0.000 | -0.002 |
| 91 | 0.001  | 0.008  | 0.000 | 0.008  |
| 92 | 0.000  | 0.003  | 0.000 | 0.003  |

|     |        |        |       |        |
|-----|--------|--------|-------|--------|
| 93  | 0.000  | 0.002  | 0.000 | 0.003  |
| 94  | 0.000  | 0.001  | 0.000 | 0.001  |
| 95  | -0.000 | -0.005 | 0.000 | -0.006 |
| 96  | -0.000 | -0.007 | 0.000 | -0.007 |
| 97  | -0.000 | -0.001 | 0.000 | -0.001 |
| 98  | -0.000 | -0.001 | 0.000 | -0.001 |
| 99  | 0.001  | 0.007  | 0.000 | 0.007  |
| 100 | 0.000  | 0.003  | 0.000 | 0.004  |
| 101 | 0.000  | 0.003  | 0.000 | 0.003  |
| 102 | 0.000  | 0.002  | 0.000 | 0.002  |
| 103 | -0.001 | -0.010 | 0.000 | -0.011 |
| 104 | -0.003 | -0.028 | 0.000 | -0.031 |
| 105 | -0.000 | -0.001 | 0.000 | -0.002 |
| 106 | -0.000 | -0.004 | 0.000 | -0.005 |
| 107 | 0.007  | 0.116  | 0.000 | 0.122  |
| 108 | 0.001  | 0.010  | 0.000 | 0.011  |
| 109 | 0.000  | 0.001  | 0.000 | 0.001  |
| 110 | -0.001 | -0.010 | 0.000 | -0.011 |
| 111 | -0.003 | -0.028 | 0.000 | -0.031 |
| 112 | -0.000 | -0.001 | 0.000 | -0.002 |
| 113 | -0.000 | -0.003 | 0.000 | -0.004 |
| 114 | 0.007  | 0.120  | 0.000 | 0.127  |

|     |        |        |       |        |
|-----|--------|--------|-------|--------|
| 115 | 0.001  | 0.010  | 0.000 | 0.011  |
| 116 | 0.000  | 0.001  | 0.000 | 0.002  |
| 117 | -0.001 | -0.010 | 0.000 | -0.011 |
| 118 | -0.003 | -0.026 | 0.000 | -0.029 |
| 119 | -0.000 | -0.002 | 0.000 | -0.002 |
| 120 | -0.000 | -0.002 | 0.000 | -0.002 |
| 121 | 0.007  | 0.115  | 0.000 | 0.122  |
| 122 | 0.001  | 0.010  | 0.000 | 0.010  |
| 123 | 0.000  | 0.003  | 0.000 | 0.003  |
| 124 | -0.001 | -0.010 | 0.000 | -0.011 |
| 125 | -0.003 | -0.024 | 0.000 | -0.027 |
| 126 | -0.000 | -0.002 | 0.000 | -0.002 |
| 127 | -0.000 | 0.001  | 0.000 | 0.001  |
| 128 | 0.006  | 0.105  | 0.000 | 0.111  |
| 129 | 0.001  | 0.009  | 0.000 | 0.010  |
| 130 | 0.000  | 0.004  | 0.000 | 0.004  |
| 131 | -0.001 | -0.009 | 0.000 | -0.010 |
| 132 | -0.003 | -0.024 | 0.000 | -0.027 |
| 133 | -0.000 | -0.002 | 0.000 | -0.002 |
| 134 | -0.000 | -0.002 | 0.000 | -0.002 |
| 135 | 0.006  | 0.097  | 0.000 | 0.102  |
| 136 | 0.001  | 0.009  | 0.000 | 0.010  |

|       |        |        |        |        |
|-------|--------|--------|--------|--------|
| 137   | 0.000  | 0.004  | 0.000  | 0.005  |
| 138   | -0.001 | -0.010 | 0.000  | -0.011 |
| 139   | -0.003 | -0.026 | 0.000  | -0.029 |
| 140   | -0.000 | -0.002 | 0.000  | -0.002 |
| 141   | -0.000 | -0.003 | 0.000  | -0.004 |
| 142   | 0.006  | 0.105  | 0.000  | 0.111  |
| 143   | 0.001  | 0.010  | 0.000  | 0.010  |
| 144   | 0.000  | 0.002  | 0.000  | 0.003  |
| 145   | 0.000  | 0.005  | 0.000  | 0.006  |
| 146   | -0.000 | 0.000  | -0.000 | 0.000  |
| 147   | 0.000  | 0.004  | 0.000  | 0.004  |
| ----- |        |        |        |        |
| tot   | 0.001  | 0.513  | -0.000 | 0.514  |

total amount of memory used by VASP MPI-rank0 132380. kBytes

=====

base : 30000. kBytes  
nonlr-proj: 13792. kBytes  
fftplans : 5354. kBytes  
grid : 63770. kBytes

one-center: 2384. kBytes  
wavefun : 17080. kBytes

General timing and accounting informations for this job:

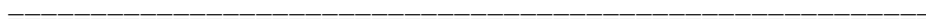

|                             |          |
|-----------------------------|----------|
| Total CPU time used (sec):  | 2537.479 |
| User time (sec):            | 2482.034 |
| System time (sec):          | 55.445   |
| Elapsed time (sec):         | 2554.695 |
| Maximum memory used (kb):   | 1120776. |
| Average memory used (kb):   | 0.       |
| Minor page faults:          | 2568508  |
| Major page faults:          | 0        |
| Voluntary context switches: | 7791     |
